# Supplementary material for: Comparative transcriptome analysis reveals molecular regulation of salt tolerance in two contrasting chickpea genotypes
Source: Front Plant Sci. 2023 May 30;14:1191457. doi: 10.3389/fpls.2023.1191457 (PMC10289292; doi:10.3389/fpls.2023.1191457)
Supplement: Supplementary file 1 [file Table_1.xlsx]

## Sheet: Sheet1
Summary of sequence data generated, trimmed reads and aligned reads. BR: Biological Replicate, TR: Technical Replicate
Sample Name	Total Sequences (comprising R1 and R2)	Input Read Pairs	Both Surviving Pairs After Trimming	%	Number of uniquely mapped reads	%	Multimapped reads	%	Unmapped reads	%
Genesis_Control_BR1_TR1	22180378	11090189	10737307	96.8181	9389071	0.874434	562232	0.0523625	786004	0.0732031
Genesis_Control_BR1_TR2	22029758	11014879	10666272	96.8351	9231231	0.86546	553779	0.0519187	881262	0.0826214
Genesis_Control_BR1_TR3	22011982	11005991	10658159	96.8396	9298050	0.872388	559166	0.0524637	800943	0.0751483
Genesis_Control_BR1_TR4	22180379	11025353	10676379	96.8348	9314453	0.872436	559815	0.0524349	802111	0.0751295
Genesis_Control_BR2_TR1	22310936	11155468	10643281	95.4086	9247671	0.868874	552704	0.0519299	842906	0.0791961
Genesis_Control_BR2_TR2	22175768	11087884	10579827	95.4179	9099921	0.86012	544017	0.0514202	935889	0.0884598
Genesis_Control_BR2_TR3	22180380	11076208	10570449	95.4338	9166089	0.867143	547061	0.0517538	857299	0.0811034
Genesis_Control_BR2_TR4	22229788	11114894	10607759	95.4373	9202011	0.867479	549405	0.0517927	856343	0.080728
Genesis_Control_BR3_TR1	22419000	11209500	10906742	97.2991	9522465	0.873081	487488	0.044696	896789	0.0822234
Genesis_Control_BR3_TR2	22180381	11106218	10807533	97.3107	9337964	0.864024	479574	0.044374	989995	0.0916023
Genesis_Control_BR3_TR3	22174246	11087123	10789079	97.3118	9398091	0.871074	481266	0.0446068	909722	0.0843188
Genesis_Control_BR3_TR4	22210772	11105386	10807221	97.3151	9414493	0.87113	483384	0.0447279	909344	0.0841423
Genesis_Control_BR4_TR1	22180382	10865827	10638859	97.9112	9269875	0.871322	526789	0.0495156	842195	0.0791622
Genesis_Control_BR4_TR2	21600600	10800300	10575153	97.9154	9121910	0.862579	517190	0.0489061	936053	0.0885144
Genesis_Control_BR4_TR3	21575126	10787563	10562692	97.9155	9182408	0.869325	521035	0.0493279	859249	0.0813475
Genesis_Control_BR4_TR4	22180383	10808821	10584265	97.9225	9202342	0.869436	523133	0.0494255	858790	0.0811384
Genesis_Control_BR5_TR1	22170778	11085389	10741324	96.8962	9384932	0.873722	527769	0.0491344	828623	0.0771435
Genesis_Control_BR5_TR2	22064398	11032199	10691137	96.9085	9247975	0.865013	519811	0.0486207	923351	0.086366
Genesis_Control_BR5_TR3	22180384	11015940	10674273	96.8984	9307337	0.871941	524241	0.0491126	842695	0.0789464
Genesis_Control_BR5_TR4	22084428	11042214	10700522	96.9056	9332800	0.872182	525235	0.049085	842487	0.0787333
Genesis_Control_BR6_TR1	24478338	12239169	11897002	97.2043	10469194	0.879986	551866	0.046387	875942	0.0736271
Genesis_Control_BR6_TR2	22180385	12149045	11809300	97.2035	10287739	0.871156	542914	0.0459734	978647	0.0828709
Genesis_Control_BR6_TR3	24267656	12133828	11795885	97.2149	10355997	0.877933	546636	0.0463412	893252	0.0757257
Genesis_Control_BR6_TR4	24326742	12163371	11824879	97.2171	10385270	0.878256	546747	0.046237	892862	0.0755071
Genesis_Treated_BR1_TR1	22932946	11466473	11129644	97.0625	9877138	0.887462	452597	0.0406659	799909	0.0718719
Genesis_Treated_BR1_TR2	22782710	11391355	11058961	97.0821	9715790	0.878545	445452	0.0402797	897719	0.0811757
Genesis_Treated_BR1_TR3	22749474	11374737	11042305	97.0775	9777093	0.885421	448142	0.0405841	817070	0.0739945
Genesis_Treated_BR1_TR4	22830126	11415063	11080676	97.0707	9814771	0.885756	450550	0.0406609	815355	0.0735835
Genesis_Treated_BR2_TR1	21310784	10655392	10346277	97.099	9070556	0.876698	501443	0.048466	774278	0.0748364
Genesis_Treated_BR2_TR2	21164980	10582490	10277973	97.1224	8918206	0.867701	491578	0.0478283	868189	0.0844708
Genesis_Treated_BR2_TR3	21145012	10572506	10268179	97.1215	8980789	0.874623	494922	0.0481996	792468	0.0771771
Genesis_Treated_BR2_TR4	21189660	10594830	10291034	97.1326	9003660	0.874903	497224	0.0483162	790150	0.0767804
Genesis_Treated_BR3_TR1	22957464	11478732	11093428	96.6433	9792588	0.882738	458046	0.0412899	842794	0.0759724
Genesis_Treated_BR3_TR2	22801162	11400581	11019203	96.6547	9628283	0.873773	450366	0.040871	940554	0.0853559
Genesis_Treated_BR3_TR3	22765842	11382921	11003366	96.6656	9691038	0.880734	453503	0.0412149	858825	0.0780511
Genesis_Treated_BR3_TR4	22822124	11411062	11030302	96.6632	9717513	0.880983	455112	0.0412602	857677	0.0777564
Genesis_Treated_BR4_TR1	23179718	11589859	11217315	96.7856	9857209	0.878749	495962	0.044214	864144	0.0770366
Genesis_Treated_BR4_TR2	22946160	11473080	11105069	96.7924	9657006	0.869603	485578	0.0437258	962485	0.0866708
Genesis_Treated_BR4_TR3	22893946	11446973	11081935	96.8111	9715546	0.876701	487338	0.0439759	879051	0.0793229
Genesis_Treated_BR4_TR4	22921204	11460602	11094738	96.8076	9732083	0.87718	489678	0.0441361	872977	0.0786839
Genesis_Treated_BR5_TR1	22478818	11239409	10888972	96.8821	9642069	0.885489	455205	0.0418042	791698	0.0727064
Genesis_Treated_BR5_TR2	22216998	11108499	10763438	96.8937	9427020	0.875837	445141	0.0413568	891277	0.082806
Genesis_Treated_BR5_TR3	22166844	11083422	10739145	96.8938	9482657	0.882999	448591	0.0417716	807897	0.0752292
Genesis_Treated_BR5_TR4	22190434	11095217	10750066	96.8892	9496472	0.883387	448680	0.0417374	804914	0.0748753
Genesis_Treated_BR6_TR1	22278342	11139171	10778475	96.7619	9375584	0.869843	468705	0.0434853	934186	0.0866714
Genesis_Treated_BR6_TR2	22144940	11072470	10716622	96.7862	9229762	0.861257	460242	0.0429466	1026618	0.0957968
Genesis_Treated_BR6_TR3	22112416	11056208	10700549	96.7832	9287556	0.867951	464782	0.0434353	948211	0.0886133
Genesis_Treated_BR6_TR4	22152232	11076116	10719916	96.7841	9307985	0.868289	465199	0.0433958	946732	0.0883152
Rupali_Control_BR1_TR1	22469110	11234555	10879825	96.8425	9540625	0.87691	529341	0.0486534	809859	0.0744368
Rupali_Control_BR1_TR2	22313946	11156973	10806091	96.855	9382743	0.868283	517270	0.0478684	906078	0.0838488
Rupali_Control_BR1_TR3	22293466	11146733	10796676	96.8596	9448129	0.875096	521917	0.0483405	826630	0.0765634
Rupali_Control_BR1_TR4	22330556	11165278	10814776	96.8608	9466035	0.875287	525230	0.048566	823511	0.0761468
Rupali_Control_BR2_TR1	23101462	11550731	11192760	96.9009	9771209	0.872994	621542	0.0555307	800009	0.0714756
Rupali_Control_BR2_TR2	22948426	11474213	11119651	96.9099	9605362	0.863819	610408	0.0548945	903881	0.0812868
Rupali_Control_BR2_TR3	22905676	11452838	11098798	96.9087	9663280	0.87066	615091	0.0554196	820427	0.0739203
Rupali_Control_BR2_TR4	22958338	11479169	11125054	96.9152	9689460	0.870958	617890	0.0555404	817704	0.0735011
Rupali_Control_BR3_TR1	22706594	11353297	11010316	96.979	9638074	0.875368	580636	0.0527356	791606	0.0718968
Rupali_Control_BR3_TR2	22573442	11286721	10947355	96.9932	9482551	0.866196	571810	0.0522327	892994	0.0815717
Rupali_Control_BR3_TR3	22537614	11268807	10930311	96.9962	9546775	0.873422	572686	0.0523943	810850	0.0741836
Rupali_Control_BR3_TR4	22589942	11294971	10955749	96.9967	9568883	0.873412	576814	0.0526494	810052	0.0739385
Rupali_Control_BR4_TR1	21389866	10694933	10331306	96.6	9070375	0.87795	506868	0.0490614	754063	0.0729882
Rupali_Control_BR4_TR2	21252288	10626144	10265817	96.6091	8919065	0.868812	499028	0.0486106	847724	0.0825774
Rupali_Control_BR4_TR3	21232364	10616182	10257826	96.6244	8982256	0.875649	503689	0.0491029	771881	0.075248
Rupali_Control_BR4_TR4	21281176	10640588	10280968	96.6203	9005970	0.875985	505594	0.0491777	769404	0.0748377
Rupali_Control_BR5_TR1	22599680	11299840	11016552	97.493	9758278	0.885783	519752	0.0471792	738522	0.0670375
Rupali_Control_BR5_TR2	22475138	11237569	10957173	97.5048	9607563	0.876829	512319	0.0467565	837291	0.0764149
Rupali_Control_BR5_TR3	22461816	11230908	10950253	97.501	9681552	0.88414	513575	0.0469007	755126	0.0689597
Rupali_Control_BR5_TR4	22501680	11250840	10970933	97.5121	9700650	0.884214	517046	0.0471287	753237	0.0686575
Rupali_Control_BR6_TR1	22693634	11346817	11049758	97.382	9774181	0.884561	521167	0.0471655	754410	0.0682739
Rupali_Control_BR6_TR2	22567274	11283637	10988663	97.3858	9620614	0.875504	512066	0.0465995	855983	0.0778969
Rupali_Control_BR6_TR3	22549834	11274917	10980555	97.3892	9691523	0.882608	515430	0.0469403	773602	0.070452
Rupali_Control_BR6_TR4	22602914	11301457	11006323	97.3885	9719499	0.883083	514533	0.0467489	772291	0.0701679
Rupali_Treated_BR1_TR1	22196472	11098236	10764455	96.9925	9461683	0.878975	450546	0.041855	852226	0.0791704
Rupali_Treated_BR1_TR2	22065016	11032508	10701713	97.0016	9313679	0.870298	443844	0.0414741	944190	0.0882279
Rupali_Treated_BR1_TR3	22058904	11029452	10698268	96.9973	9385969	0.877335	447242	0.0418051	865057	0.0808595
Rupali_Treated_BR1_TR4	22099900	11049950	10717065	96.9875	9404465	0.877522	448228	0.0418238	864372	0.0806538
Rupali_Treated_BR2_TR1	22224990	11112495	10753097	96.7658	9402846	0.874431	497965	0.046309	852286	0.0792596
Rupali_Treated_BR2_TR2	22077022	11038511	10682598	96.7757	9247621	0.865672	489863	0.0458562	945114	0.0884723
Rupali_Treated_BR2_TR3	22047102	11023551	10669039	96.784	9309166	0.87254	493056	0.0462137	866817	0.081246
Rupali_Treated_BR2_TR4	22087684	11043842	10688121	96.779	9331250	0.873049	494396	0.0462566	862475	0.0806947
Rupali_Treated_BR3_TR1	22437670	11218835	10858858	96.7913	9531400	0.877753	490012	0.0451256	837446	0.077121
Rupali_Treated_BR3_TR2	22288472	11144236	10787103	96.7954	9375226	0.869114	481241	0.0446126	930636	0.086273
Rupali_Treated_BR3_TR3	22247534	11123767	10767388	96.7962	9432928	0.876065	484937	0.0450376	849523	0.0788978
Rupali_Treated_BR3_TR4	22300676	11150338	10794727	96.8108	9459238	0.876283	484969	0.0449265	850520	0.0787903
Rupali_Treated_BR4_TR1	21933882	10966941	10567917	96.3616	9225972	0.873017	479597	0.0453824	862348	0.0816006
Rupali_Treated_BR4_TR2	21805350	10902675	10507038	96.3712	9075623	0.863766	471047	0.0448316	960368	0.0914024
Rupali_Treated_BR4_TR3	21776464	10888232	10493306	96.3729	9138143	0.870855	474128	0.0451839	881035	0.0839616
Rupali_Treated_BR4_TR4	21815034	10907517	10512659	96.3799	9156303	0.870979	476003	0.045279	880353	0.0837422
Rupali_Treated_BR5_TR1	20918740	10459370	10157541	97.1143	8994773	0.885527	416430	0.0409971	746338	0.0734762
Rupali_Treated_BR5_TR2	20786618	10393309	10094973	97.1295	8845685	0.876247	410348	0.0406487	838940	0.0831047
Rupali_Treated_BR5_TR3	20770458	10385229	10087567	97.1338	8914089	0.883671	412167	0.0408589	761311	0.0754702
Rupali_Treated_BR5_TR4	20819404	10409702	10111913	97.1393	8937130	0.883822	414050	0.0409468	760733	0.0752314
Rupali_Treated_BR6_TR1	22966850	11483425	11143867	97.0431	9839441	0.882947	483833	0.043417	820593	0.0736363
Rupali_Treated_BR6_TR2	22807002	11403501	11067256	97.0514	9673518	0.874067	475347	0.0429508	918391	0.0829827
Rupali_Treated_BR6_TR3	22779966	11389983	11055048	97.0594	9741426	0.881174	477376	0.0431817	836246	0.0756438
Rupali_Treated_BR6_TR4	22836032	11418016	11081436	97.0522	9764758	0.881182	480510	0.0433617	836168	0.0754566
