# Supplementary material for: Comparative transcriptome analysis reveals molecular regulation of salt tolerance in two contrasting chickpea genotypes
Source: Front Plant Sci. 2023 May 30;14:1191457. doi: 10.3389/fpls.2023.1191457 (PMC10289292; doi:10.3389/fpls.2023.1191457)
Supplement: Supplementary file 3 [file Table_3.xlsx]

## Sheet: Genesis salt-responsive DEGs
Salt-responsive genes in Genesis836
Gene ID	Chr	Start	End	logFC	AveExpr	t	P.Value	adj.P.Val	B	Chickpea Annotation	At Homologue	At Annotation	Mt Homologue	Mt Annotation
Ca06843	Ca1	205105	207844	0.317937	3.17789	5.15673	3.03033e-05	0.000378667	2.27561	RAB GTPase-like protein B1C n_3 Tax_Papilionoideae RepID_Q1SL04_MEDTR	AT4G17530.1	RAB GTPase homolog 1C	Medtr7g081700.1	RAB GTPase-like protein B1C
Ca06865	Ca1	298091	301830	0.5309	3.13634	5.89438	4.93006e-06	0.000108967	4.04831	PREDICTED: tRNA pseudouridine synthase-like 1 isoform X1 n_2 Tax_Cicer arietinum RepID_UPI00032AD21D	AT1G09800.1	Pseudouridine synthase family protein	Medtr2g005830.1	tRNA pseudouridine synthase A
Ca06864	Ca1	332318	338438	0.846483	3.78388	5.57515	1.07578e-05	0.000178849	3.21236	PREDICTED: ribosome biogenesis protein BOP1 homolog n_1 Tax_Cicer arietinum RepID_UPI00032A7585	AT2G40360.1	Transducin/WD40 repeat-like superfamily protein	Medtr2g006020.1	transducin/WD40 repeat protein
Ca06879	Ca1	407433	413820	0.364031	6.28573	4.94537	5.13522e-05	0.000554292	1.63868	Uncharacterized protein n_11 Tax_Papilionoideae RepID_A0A0S3S1S1_PHAAN	AT1G10950.1	transmembrane nine 1	Medtr8g088730.1	endomembrane protein 70 family protein
Ca06872	Ca1	415463	418579	0.759003	3.30112	5.82654	5.81444e-06	0.000120504	3.88736	Uncharacterized protein n_8 Tax_Papilionoideae RepID_I1LTF6_SOYBN	AT5G08590.1	SNF1-related protein kinase 2.1	Medtr2g006330.2	sucrose non-fermenting-like kinase 2 family protein
Ca06896	Ca1	594188	599786	-0.306352	4.98463	-5.00793	4.39192e-05	0.000495302	1.79012	Ribosomal protein S7 n_3 Tax_Medicago truncatula RepID_A2Q3T8_MEDTR	#N/A	#N/A	#N/A
Ca06893	Ca1	679217	681275	1.00845	3.6672	5.32891	1.97575e-05	0.000277774	2.62031	PREDICTED: mRNA turnover protein 4 homolog n_1 Tax_Cicer arietinum RepID_UPI00032ACC76	AT1G25260.1	Ribosomal protein L10 family protein	Medtr2g007780.1	ribosomal protein L10 family protein
Ca06915	Ca1	705766	709485	0.384967	4.76771	4.80436	7.30933e-05	0.000718484	1.28806	PREDICTED: pinin n_1 Tax_Cicer arietinum RepID_UPI00032A565A	AT1G15200.2	protein-protein interaction regulator family protein	Medtr2g007800.1	protein interaction regulator family protein
Ca06924	Ca1	939333	950691	1.09235	2.1098	4.96356	4.90682e-05	0.000536454	1.90801	PREDICTED: high affinity sulfate transporter 2-like n_2 Tax_Cicer arietinum RepID_UPI00032A6DC0	AT1G22150.1	sulfate transporter 1;3	Medtr2g008470.1	high affinity sulfate transporter type 1
Ca06927	Ca1	962238	968062	-0.699483	7.59038	-7.79702	6.00108e-08	5.99912e-06	8.35789	PREDICTED: probable protein phosphatase 2C 62 n_1 Tax_Cicer arietinum RepID_UPI00032AB6A1	#N/A	#N/A	Medtr2g008590.2	SpoIIE-like protein phosphatase domain protein
Ca06920	Ca1	969516	970851	-0.355355	11.4961	-5.99153	3.89568e-06	9.18095e-05	4.06865	Light-harvesting complex I chlorophyll A/B-binding protein n_12 Tax_Papilionoideae RepID_G7INT9_MEDTR	AT1G15820.1	light harvesting complex photosystem II subunit 6	Medtr2g008610.1	light-harvesting complex I chlorophyll A/B-binding protein
Ca06932	Ca1	980577	986528	-0.535746	7.72957	-6.65867	7.95171e-07	3.1185e-05	5.78306	PREDICTED: uncharacterized protein LOC101510618 isoform X1 n_1 Tax_Cicer arietinum RepID_UPI00032AA6B3	AT5G64170.2	dentin sialophosphoprotein-related	Medtr2g008750.2	dentin sialophosphoprotein-like protein%2C putative
Ca06969	Ca1	1036154	1039254	0.623625	4.7081	6.99374	3.65249e-07	1.96707e-05	6.56334	PREDICTED: ribosome biogenesis regulatory protein homolog n_1 Tax_Cicer arietinum RepID_UPI00032A6AE8	AT2G37990.1	ribosome biogenesis regulatory protein (RRS1) family protein	Medtr2g008870.1	ribosome biogenesis regulatory family protein
Ca06968	Ca1	1040607	1043018	-0.938999	0.553565	-5.0256	4.20234e-05	0.000479663	2.19455	PREDICTED: monoacylglycerol lipase ABHD6 n_1 Tax_Cicer arietinum RepID_UPI00032A7F04	AT5G09430.1	alpha/beta-Hydrolases superfamily protein	Medtr2g008880.1	alpha/beta-hydrolase superfamily protein
Ca06976	Ca1	1049441	1059753	-1.04189	5.7996	-6.15329	2.63782e-06	7.06575e-05	4.58652	PREDICTED: metacaspase-3-like isoform X1 n_2 Tax_Cicer arietinum RepID_UPI00032ABAB4	AT1G02170.1	metacaspase 1	Medtr2g008980.1	ICE-like protease (caspase) p20 domain protein
Ca06974	Ca1	1078755	1084004	0.324075	7.68597	6.25505	2.06706e-06	5.91947e-05	4.82295	PREDICTED: phospho-2-dehydro-3-deoxyheptonate aldolase 2 - chloroplastic-like n_1 Tax_Cicer arietinum RepID_UPI00032A71CC	AT4G33510.2	3-deoxy-d-arabino-heptulosonate 7-phosphate synthase	Medtr2g009080.1	phospho-2-dehydro-3-deoxyheptonate aldolase
Ca06962	Ca1	1110972	1114236	-0.367609	8.3846	-6.798	5.74414e-07	2.58402e-05	6.0916	2-oxoglutarate/malate translocator n_2 Tax_Papilionoideae RepID_G7IPL2_MEDTR	AT5G64290.1	dicarboxylate transport 2.1	Medtr2g009220.1	2-oxoglutarate/malate translocator
Ca06952	Ca1	1122537	1122863	2.83896	3.49573	7.92251	4.56081e-08	5.01853e-06	8.7103	PREDICTED: classical arabinogalactan protein 1-like n_1 Tax_Cicer arietinum RepID_UPI00032A9934	#N/A	#N/A	#N/A
Ca07340	Ca1	1392021	1395645	0.766003	6.45939	7.87902	5.0147e-08	5.29055e-06	8.53994	Heat shock 70 kDa protein - mitochondrial n_25 Tax_rosids RepID_HSP7M_PHAVU	AT5G09590.1	mitochondrial HSO70 2	Medtr4g092920.1	heat shock 70 kDa protein
Ca07336	Ca1	1397623	1404381	0.638974	4.31326	4.825	6.94088e-05	0.000693405	1.3519	PREDICTED: DNA polymerase V n_1 Tax_Cicer arietinum RepID_UPI00032A7018	AT5G64420.1	DNA polymerase V family	Medtr2g010110.1	DNA polymerase V-like protein%2C putative
Ca07363	Ca1	1404696	1407361	0.417774	5.1336	7.31599	1.75189e-07	1.23627e-05	7.29104	PREDICTED: transcription factor GTE7-like n_1 Tax_Cicer arietinum RepID_UPI00032AC638	AT5G65630.1	global transcription factor group E7	Medtr4g092900.4	global transcription factor group protein
Ca07354	Ca1	1513212	1515312	-1.00899	3.58108	-7.86136	5.21197e-08	5.29055e-06	8.56137	PREDICTED: uncharacterized protein LOC101507431 n_1 Tax_Cicer arietinum RepID_UPI00032A717E	AT5G64510.1	#N/A	Medtr2g010460.1	nicotiana tabacum ORF protein
Ca07344	Ca1	1525847	1530170	0.484232	4.75409	5.5178	1.23887e-05	0.000196766	3.0514	PREDICTED: proline iminopeptidase n_1 Tax_Cicer arietinum RepID_UPI00032AA6A8	AT2G14260.2	proline iminopeptidase	Medtr2g010480.1	proline iminopeptidase
Ca07335	Ca1	1677535	1680115	-1.05268	2.38787	-7.44843	1.30039e-07	1.02523e-05	7.69797	PREDICTED: transcription factor bHLH112-like isoform X1 n_2 Tax_Cicer arietinum RepID_UPI00032AAE63	AT1G61660.3	basic helix-loop-helix (bHLH) DNA-binding superfamily protein	Medtr2g011070.1	BHLH transcription factor-like protein
Ca06984	Ca1	1750428	1752891	-0.805354	2.11521	-6.37843	1.54044e-06	4.85878e-05	5.31208	PREDICTED: protein PLANT CADMIUM RESISTANCE 8-like n_1 Tax_Cicer arietinum RepID_UPI000640F4EA	#N/A	#N/A	Medtr2g011490.2	PLAC8 family protein
Ca06986	Ca1	1752956	1753238	-0.669684	0.741356	-4.79063	7.56536e-05	0.00073505	1.66098	No Hits	#N/A	#N/A	#N/A
Ca07004	Ca1	1817615	1822820	-0.610724	5.05176	-7.14602	2.57676e-07	1.58279e-05	6.90786	PREDICTED: putative PAP-specific phosphatase - mitochondrial isoform X1 n_2 Tax_Cicer arietinum RepID_UPI00032A7073	AT4G05090.1	Inositol monophosphatase family protein	Medtr2g011680.1	inositol monophosphatase family protein
Ca07014	Ca1	1914436	1924171	0.320484	4.50951	6.04778	3.4006e-06	8.40262e-05	4.34163	AP2/B3 transcription factor family protein n_2 Tax_Papilionoideae RepID_G7ILC5_MEDTR	AT4G32010.1	HSI2-like 1	Medtr2g011940.1	AP2/B3 transcription factor family protein
Ca07026	Ca1	2076719	2082790	1.11021	2.74471	5.41543	1.59492e-05	0.000238278	2.98265	PREDICTED: protein STRUBBELIG-RECEPTOR FAMILY 3-like n_1 Tax_Cicer arietinum RepID_UPI00032A555B	AT4G03390.1	STRUBBELIG-receptor family 3	Medtr2g012670.1	strubbelig receptor family 3 protein
Ca07049	Ca1	2215491	2217349	-0.675436	2.09975	-5.92415	4.58637e-06	0.000104171	4.24227	PREDICTED: CBS domain-containing protein CBSX5-like n_1 Tax_Cicer arietinum RepID_UPI00032AAB26	AT4G27460.1	Cystathionine beta-synthase (CBS) family protein	Medtr2g013110.1	CBS domain CBSX5-like protein
Ca07051	Ca1	2239614	2252564	-0.368188	3.27025	-5.11078	3.39783e-05	0.000407927	2.1448	PREDICTED: mediator of RNA polymerase II transcription subunit 16-like isoform X1 n_4 Tax_Cicer arietinum RepID_UPI00032A570D	AT4G04920.2	sensitive to freezing 6	Medtr4g088965.1	mediator of RNA polymerase II transcription subunit 16
Ca07062	Ca1	2299787	2300629	-2.01066	1.64504	-5.61399	9.77855e-06	0.000168237	3.54159	PREDICTED: dof zinc finger protein DOF4.7-like n_1 Tax_Cicer arietinum RepID_UPI00032AA63E	AT1G28310.2	Dof-type zinc finger DNA-binding family protein	Medtr2g013370.1	Dof domain zinc finger protein
Ca07067	Ca1	2319694	2320410	-0.343673	3.4858	-4.79141	7.55062e-05	0.00073505	1.32965	PREDICTED: enoyl-CoA delta isomerase 2 - peroxisomal-like n_1 Tax_Cicer arietinum RepID_UPI00032A5FCD	AT4G14440.1	3-hydroxyacyl-CoA dehydratase 1	Medtr2g013460.1	enoyl-CoA hydratase/isomerase family protein
Ca07073	Ca1	2331047	2331736	0.548272	2.78265	4.6576	0.000105623	0.00091686	1.00986	PREDICTED: E3 ubiquitin-protein ligase RMA1H1-like n_1 Tax_Cicer arietinum RepID_UPI00032A95BD	AT4G27470.1	RING membrane-anchor 3	Medtr2g013550.2	E3 ubiquitin-protein ligase RMA1H1-like protein
Ca07081	Ca1	2409991	2413817	-0.679173	3.85703	-6.14984	2.65978e-06	7.09971e-05	4.65206	PREDICTED: serine/threonine-protein kinase HT1-like n_1 Tax_Cicer arietinum RepID_UPI00032A7078	AT5G58950.1	Protein kinase superfamily protein	Medtr2g013900.1	tyrosine kinase family protein
Ca07076	Ca1	2455698	2460409	0.564017	3.81934	6.50138	1.15118e-06	4.02143e-05	5.43787	PREDICTED: protein SMG7L isoform X1 n_3 Tax_Cicer arietinum RepID_UPI00032A5148	AT1G28260.2	Telomerase activating protein Est1	Medtr2g013980.3	telomerase activating protein Est1
Ca07169	Ca1	3084427	3090506	-0.431084	4.27651	-5.39204	1.68985e-05	0.000249481	2.75595	Maternal effect embryo arrest 18 protein n_2 Tax_Papilionoideae RepID_G7ILI7_MEDTR	AT2G34090.1	maternal effect embryo arrest 18	Medtr2g015860.1	maternal effect embryo arrest 18 protein
Ca07229	Ca1	3633027	3634760	-0.575696	1.77309	-5.07095	3.75264e-05	0.000438974	2.25759	PREDICTED: uncharacterized protein LOC101495581 n_1 Tax_Cicer arietinum RepID_UPI00032A4D3D	AT5G45660.1	#N/A	Medtr2g018105.1	transmembrane protein%2C putative
Ca07230	Ca1	3678656	3680607	0.242802	4.60142	4.71813	9.07382e-05	0.000830049	1.08407	PREDICTED: eukaryotic translation initiation factor 4E-1-like n_1 Tax_Cicer arietinum RepID_UPI00032A7ABC	AT4G18040.1	eukaryotic translation initiation factor 4E	Medtr2g018260.1	eukaryotic translation initiation factor 4E
Ca07255	Ca1	3814640	3819268	0.538426	5.30594	4.98723	4.62503e-05	0.000513855	1.73909	PREDICTED: uncharacterized protein LOC101501722 n_1 Tax_Cicer arietinum RepID_UPI00032A78E5	AT2G34640.1	plastid transcriptionally active 12	Medtr2g018740.1	plastid transcriptionally active protein
Ca07259	Ca1	3936260	3937645	0.527259	4.89002	6.59111	9.31808e-07	3.46834e-05	5.62554	PREDICTED: transcription factor TCP2 n_1 Tax_Cicer arietinum RepID_UPI00032A5C4F	AT1G30210.2	TEOSINTE BRANCHED 1, cycloidea, and PCF family 24	Medtr7g015010.1	TCP family transcription factor
Ca07262	Ca1	3955163	3956371	-0.392305	4.38651	-5.90344	4.82279e-06	0.00010756	3.99744	F-box plant-like protein n_2 Tax_Papilionoideae RepID_G7IP60_MEDTR	AT5G46170.1	F-box family protein	Medtr2g019080.2	F-box plant-like protein
Ca07273	Ca1	4119200	4121737	-0.492968	3.66418	-4.87385	6.14168e-05	0.000637992	1.52633	PREDICTED: uncharacterized protein LOC101514291 n_1 Tax_Cicer arietinum RepID_UPI00032A9FB8	AT5G46220.1	Protein of unknown function (DUF616)	Medtr2g019450.1	transmembrane protein
Ca07280	Ca1	4232597	4238457	-0.276873	4.18349	-4.94122	5.18883e-05	0.000559684	1.64437	PREDICTED: zinc finger CCCH domain-containing protein 34-like n_1 Tax_Cicer arietinum RepID_UPI00032A9CBF	AT5G18550.1	Zinc finger C-x8-C-x5-C-x3-H type family protein	Medtr2g019740.1	zinc finger C-x8-C-x5-C-x3-H type protein
Ca07294	Ca1	4485710	4487694	0.527488	5.12575	4.80536	7.29116e-05	0.000717159	1.28892	PREDICTED: acyl carrier protein 1 - chloroplastic-like n_1 Tax_Cicer arietinum RepID_UPI00032A6F4A	#N/A	#N/A	Medtr2g020360.3	acyl carrier protein
Ca07308	Ca1	4544206	4568349	-0.553549	6.9679	-6.31468	1.79281e-06	5.32385e-05	4.97325	PREDICTED: probable 1-deoxy-D-xylulose-5-phosphate synthase - chloroplastic n_1 Tax_Cicer arietinum RepID_UPI000640C227	AT4G15560.1	Deoxyxylulose-5-phosphate synthase	Medtr4g118640.1	1-deoxy-D-xylulose-5-phosphate synthase
Ca07304	Ca1	4577001	4583210	-0.265161	5.24572	-5.05219	3.93241e-05	0.000455999	1.898	PREDICTED: squamosa promoter-binding-like protein 7 n_1 Tax_Cicer arietinum RepID_UPI0006415C0F	AT5G18830.2	squamosa promoter binding protein-like 7	Medtr2g020620.1	squamosa promoter-binding-like protein
Ca07388	Ca1	4835153	4838894	0.329765	4.26401	5.15514	3.04236e-05	0.000378773	2.17886	PREDICTED: protein ABCI12 - chloroplastic isoform X1 n_3 Tax_Cicer arietinum RepID_UPI00032A841C	AT3G21580.1	cobalt ion transmembrane transporters	Medtr2g021220.1	cobalt ion transmembrane transporters protein
Ca07384	Ca1	4854634	4864090	1.27804	0.621176	5.93437	4.47404e-06	0.000102903	4.22564	PREDICTED: uncharacterized protein LOC101512873 isoform X1 n_2 Tax_Cicer arietinum RepID_UPI000640DCF8	AT4G02930.1	GTP binding Elongation factor Tu family protein	Medtr2g021300.1	GTP-binding elongation factor Tu family protein
Ca07390	Ca1	4875438	4881635	-0.777661	6.91272	-6.93984	4.13548e-07	2.14869e-05	6.43586	Mitogen-activated protein kinase n_12 Tax_Papilionoideae RepID_A0A0B2RMI2_GLYSO	AT2G42880.1	MAP kinase 20	Medtr2g021330.1	MAP kinase-like protein
Ca07399	Ca1	4985953	4989139	-0.389986	5.39838	-6.08732	3.09142e-06	7.88679e-05	4.42656	Uncharacterized protein n_33 Tax_Pentapetalae RepID_K4B9Q9_SOLLC	AT4G04860.1	DERLIN-2.2	Medtr2g022890.1	derlin-2 protein
Ca07424	Ca1	5035619	5037587	3.35679	4.28124	6.85777	4.9998e-07	2.36025e-05	6.28544	Glucose-6-phosphate/phosphate translocator-like protein n_2 Tax_Papilionoideae RepID_A0A072VF80_MEDTR	AT1G61800.1	glucose-6-phosphate/phosphate translocator 2,regulation of photosynthesis, antiporter activity,transmembrane transporter activity	Medtr2g022700.1	glucose-6-phosphate/phosphate translocator-like protein
Ca07408	Ca1	5097292	5101366	0.382632	3.82386	6.74242	6.5379e-07	2.8156e-05	6.01363	PREDICTED: ATP-dependent (S)-NAD(P)H-hydrate dehydratase isoform X1 n_2 Tax_Cicer arietinum RepID_UPI00032AC6C7	AT5G19150.2	pfkB-like carbohydrate kinase family protein	Medtr2g022530.2	ATP-dependent (S)-NAD(P)H-hydrate dehydratase
Ca07466	Ca1	5470001	5477001	0.373742	8.12893	4.85748	6.39867e-05	0.00065683	1.40538	PREDICTED: putative lactoylglutathione lyase n_1 Tax_Cicer arietinum RepID_UPI00032AC84C	AT1G11840.6	glyoxalase I homolog	Medtr2g023500.4	lactoylglutathione lyase-like protein
Ca07499	Ca1	5770909	5773061	0.62145	3.94799	5.25495	2.37369e-05	0.000316539	2.46013	1-aminocyclopropane-1-carboxylate oxidase n_4 Tax_Papilionoideae RepID_Q19PX3_MEDSA	AT1G05010.1	ethylene-forming enzyme	Medtr2g025120.2	1-aminocyclopropane-1-carboxylate oxidase
Ca07526	Ca1	5792165	5796750	0.548355	7.00939	5.7581	6.87076e-06	0.000134729	3.62752	PREDICTED: ubiquinol oxidase 4 - chloroplastic/chromoplastic n_1 Tax_Cicer arietinum RepID_UPI00032ABEC8	AT4G22260.1	Alternative oxidase family protein	Medtr2g025140.1	ubiquinol oxidase
Ca07524	Ca1	5823350	5826361	-0.383751	3.07808	-4.7446	8.49088e-05	0.000794785	1.26855	PREDICTED: uncharacterized membrane protein At1g16860 n_1 Tax_Cicer arietinum RepID_UPI00032AC24E	AT4G22290.1	Ubiquitin-specific protease family C19-related protein	Medtr2g025190.1	ubiquitin-specific protease family C19 protein
Ca07517	Ca1	5897593	5903121	0.274029	5.48726	4.72956	8.81723e-05	0.00081437	1.10029	Phosphatidate cytidylyltransferase n_3 Tax_Medicago truncatula RepID_G7IM02_MEDTR	AT4G22340.1	cytidinediphosphate diacylglycerol synthase 2	Medtr2g025550.2	phosphatidate cytidylyltransferase family protein
Ca07511	Ca1	5924942	5929997	0.299624	6.51063	5.84924	5.50182e-06	0.000116069	3.85683	Fumarylacetoacetase n_2 Tax_Papilionoideae RepID_Q2HT34_MEDTR	AT1G12050.1	fumarylacetoacetase, putative	Medtr2g025640.1	fumarylacetoacetase
Ca07518	Ca1	5943323	5946735	-0.668511	3.80586	-7.55133	1.03325e-07	8.65568e-06	7.86333	PREDICTED: rho GDP-dissociation inhibitor 1 n_1 Tax_Cicer arietinum RepID_UPI00032AA2FC	AT3G07880.1	Immunoglobulin E-set superfamily protein	Medtr2g025740.1	Rho GDP-dissociation inhibitor-like protein
Ca07531	Ca1	5996590	6000659	-0.674778	2.95767	-5.43147	1.53292e-05	0.00023168	2.99288	PREDICTED: tonoplast dicarboxylate transporter n_1 Tax_Cicer arietinum RepID_UPI00032A7080	AT5G47560.1	tonoplast dicarboxylate transporter, anion transmembrane transport	Medtr2g026030.1	tonoplast dicarboxylate transporter
Ca07534	Ca1	6018701	6023326	-0.37473	5.64588	-5.15465	3.04603e-05	0.000378773	2.15322	PREDICTED: putative MO25-like protein At5g47540 n_1 Tax_Cicer arietinum RepID_UPI00032AC932	AT5G47540.1	Mo25 family protein	Medtr2g026050.1	calcium-binding protein
Ca07533	Ca1	6027006	6031810	-0.3959	7.28008	-4.78702	7.63412e-05	0.00073948	1.24403	Inositol monophosphatase family protein n_3 Tax_Papilionoideae RepID_G7IP84_MEDTR	AT3G02870.1	Inositol monophosphatase family protein	Medtr2g026060.1	inositol monophosphatase family protein
Ca07559	Ca1	6278135	6282252	-0.595318	3.70937	-4.98713	4.62621e-05	0.000513855	1.80854	PREDICTED: FK506-binding protein 5-like n_1 Tax_Cicer arietinum RepID_UPI00032AC691	#N/A	#N/A	Medtr2g026685.3	heavy metal transport/detoxification superfamily protein
Ca07570	Ca1	6373496	6375268	0.46816	2.2382	6.13229	2.7743e-06	7.34133e-05	4.72662	C2 n_2 Tax_Medicago truncatula RepID_Q2HV28_MEDTR	AT5G47710.2	Calcium-dependent lipid-binding (CaLB domain) family protein	Medtr2g027100.1	ADP-ribosylation factor GTPase-activating AGD12-like protein
Ca07601	Ca1	6492994	6494680	-0.675026	1.40537	-5.46664	1.40542e-05	0.000216693	3.20904	PREDICTED: uncharacterized protein At4g26485-like n_1 Tax_Cicer arietinum RepID_UPI00032AC2A4	AT1G55800.1	Domain of unknown function (DUF2431)	Medtr2g027540.1	nucleic acid-binding protein%2C putative
Ca07589	Ca1	6530617	6539298	0.434106	4.94444	5.53251	1.19478e-05	0.000192393	3.08382	PREDICTED: enhancer of mRNA-decapping protein 4-like isoform X1 n_1 Tax_Cicer arietinum RepID_UPI00032A8C47	AT3G13300.2	Transducin/WD40 repeat-like superfamily protein	Medtr2g027690.2	enhancer of mRNA-decapping-like protein
Ca07638	Ca1	6723574	6726444	0.346198	4.70702	6.67918	7.57891e-07	3.05923e-05	5.83283	PREDICTED: protein TIC 20-IV - chloroplastic-like n_1 Tax_Cicer arietinum RepID_UPI00032AB662	AT4G03320.1	translocon at the inner envelope membrane of chloroplasts 20-IV	Medtr2g090045.1	TIC protein 20-IV%2C related protein
Ca07645	Ca1	6899416	6904513	-0.546314	7.37556	-6.28972	1.90278e-06	5.53722e-05	4.9106	PREDICTED: putative E3 ubiquitin-protein ligase LIN isoform X1 n_2 Tax_Cicer arietinum RepID_UPI00032A6D39	#N/A	#N/A	Medtr2g028940.2	E3 ubiquitin-protein ligase LIN-like protein%2C putative
Ca07652	Ca1	7066344	7068476	1.39231	1.33334	4.89307	5.85317e-05	0.000615783	1.89425	PREDICTED: patatin-like protein 7 n_1 Tax_Cicer arietinum RepID_UPI00032ABB6F	AT3G54950.1	patatin-like protein 6	Medtr2g029510.1	patatin-like phospholipase
Ca07670	Ca1	7109188	7157888	-0.974991	6.47059	-5.8511	5.47706e-06	0.000115707	3.86107	Peroxidase n_1 Tax_Leersia perrieri RepID_A0A0D9X2X2_9ORYZ	AT2G38380.1	Peroxidase superfamily protein	Medtr2g029820.1	peroxidase family protein
Ca07669	Ca1	7160136	7163565	0.713387	2.93447	5.37275	1.77248e-05	0.000257456	2.79007	PREDICTED: U3 small nucleolar RNA-interacting protein 2-like n_1 Tax_Cicer arietinum RepID_UPI00032ACB30	AT4G05410.1	Transducin/WD40 repeat-like superfamily protein	Medtr2g029940.1	U3 small nucleolar RNA-associated-like protein
Ca07674	Ca1	7164812	7180898	-0.243318	5.39947	-4.86092	6.34369e-05	0.0006525	1.42492	PREDICTED: serine/threonine-protein phosphatase 6 regulatory subunit 3 isoform X1 n_3 Tax_Cicer arietinum RepID_UPI000640D783	AT1G30470.3	SIT4 phosphatase-associated family protein	Medtr2g029960.1	SIT4 phosphatase-associated family protein
Ca07660	Ca1	7190669	7194107	0.825984	1.81926	7.24584	2.0534e-07	1.36551e-05	7.2569	PREDICTED: uncharacterized mitochondrial protein ymf11 n_1 Tax_Cicer arietinum RepID_UPI00032A7E1E	AT5G46920.1	Intron maturase, type II family protein	#N/A
Ca07723	Ca1	7687996	7690236	1.43839	3.41733	5.49474	1.31131e-05	0.000205235	3.08876	PREDICTED: patellin-4 n_1 Tax_Cicer arietinum RepID_UPI00032A9DD6	AT1G30690.2	Sec14p-like phosphatidylinositol transfer family protein	Medtr2g031610.1	Sec14p-like phosphatidylinositol transfer family protein
Ca07724	Ca1	7708386	7717410	0.384263	3.96871	7.11343	2.77585e-07	1.64561e-05	6.85788	PREDICTED: primase homolog protein n_1 Tax_Cicer arietinum RepID_UPI00032A5D1D	ATMG00860.1	DNA/RNA polymerases superfamily protein	Medtr1g052140.1	DNA/RNA polymerase superfamily protein%2C putative
Ca07737	Ca1	7976403	7978231	0.464879	2.76087	4.92974	5.33993e-05	0.000572751	1.78223	PREDICTED: probable protein phosphatase 2C 13 n_1 Tax_Cicer arietinum RepID_UPI00032A55EA	AT1G48040.1	Protein phosphatase 2C family protein	Medtr2g033000.1	protein phosphatase 2C-like protein
Ca07746	Ca1	8171795	8178018	-0.385274	4.93538	-5.51358	1.2518e-05	0.000198406	3.03687	PREDICTED: uncharacterized protein LOC101493668 n_1 Tax_Cicer arietinum RepID_UPI00032AB86B	AT5G49580.1	Chaperone DnaJ-domain superfamily protein	Medtr2g033460.2	chaperone DnaJ-domain protein
Ca07771	Ca1	8179607	8183155	0.682902	4.69847	9.2932	2.60787e-09	6.76057e-07	11.4815	PREDICTED: uncharacterized protein LOC101493348 n_1 Tax_Cicer arietinum RepID_UPI00032A8CC8	AT3G17170.1	Translation elongation factor EF1B/ribosomal protein S6 family protein	Medtr2g033490.1	30S ribosomal protein S6
Ca07803	Ca1	8612820	8614166	-0.997778	6.13431	-10.3236	3.55611e-10	1.90432e-07	13.452	Non-specific serine/threonine protein kinase n_2 Tax_Papilionoideae RepID_A0A072VCV6_MEDTR	AT5G25110.1	CBL-interacting protein kinase 25, involved in signal transduction	Medtr2g105010.1	CBL-interacting kinase
Ca07861	Ca1	8853690	8856757	0.385248	4.54672	5.47922	1.36246e-05	0.000210919	2.95941	Pti1-like kinase n_2 Tax_Papilionoideae RepID_G7II77_MEDTR	AT1G52540.1	Protein kinase superfamily protein	Medtr2g103950.1	Pti1-like kinase
Ca07840	Ca1	8953598	8955251	-0.658417	5.34965	-5.36425	1.81017e-05	0.00026144	2.66827	PREDICTED: DCC family protein At1g52590 - chloroplastic n_1 Tax_Cicer arietinum RepID_UPI00032AC0CA	#N/A	#N/A	Medtr2g103590.1	thiol-disulfide oxidoreductase DCC
Ca07880	Ca1	9213936	9218441	-0.435417	3.43337	-6.74059	6.56585e-07	2.8156e-05	6.04771	Alpha/beta fold hydrolase n_2 Tax_Papilionoideae RepID_G7IMG6_MEDTR	AT1G15490.1	alpha/beta-Hydrolases superfamily protein	Medtr2g102800.1	alpha/beta fold hydrolase
Ca07899	Ca1	9329287	9341675	0.463345	4.50626	6.48855	1.18662e-06	4.09484e-05	5.39184	Amino-terminal acetyltransferase - putative n_3 Tax_Papilionoideae RepID_A0A072VDQ9_MEDTR	AT1G80410.1	tetratricopeptide repeat (TPR)-containing protein	Medtr2g102435.1	amine-terminal acetyltransferase%2C putative
Ca07904	Ca1	9419801	9420611	-0.607999	0.659732	-5.16291	2.98407e-05	0.000374724	2.51958	No Hits	#N/A	#N/A	#N/A
Ca07905	Ca1	9427510	9438920	-1.04934	3.31245	-7.92684	4.51798e-08	5.00743e-06	8.68942	PREDICTED: regulator of telomere elongation helicase 1 n_1 Tax_Cicer arietinum RepID_UPI00032AB9B0	AT1G79950.1	RAD3-like DNA-binding helicase protein	Medtr2g102150.3	regulator of telomere elongation helicase-like protein
Ca07909	Ca1	9440928	9441815	-0.684873	4.17765	-6.10599	2.95548e-06	7.64875e-05	4.49447	PREDICTED: transcription repressor OFP14 n_1 Tax_Cicer arietinum RepID_UPI00032A50FA	AT1G79960.1	ovate family protein 14	Medtr2g102140.1	ovate transcriptional repressor
Ca07922	Ca1	9526410	9529212	-1.27059	1.52081	-9.37174	2.22998e-09	6.09062e-07	11.2316	PREDICTED: rop guanine nucleotide exchange factor 12-like n_1 Tax_Cicer arietinum RepID_UPI00032A7521	AT4G13240.1	RHO guanyl-nucleotide exchange factor 9	Medtr2g101830.1	RHO guanyl-nucleotide exchange factor
Ca07928	Ca1	9575607	9579100	1.12095	2.22357	4.83586	6.75473e-05	0.000681038	1.58406	PREDICTED: protein NRT1/ PTR FAMILY 1.2-like n_1 Tax_Cicer arietinum RepID_UPI00032A5D8A	AT1G52190.1	Major facilitator superfamily protein	Medtr2g101640.1	peptide/nitrate transporter plant
Ca07931	Ca1	9585423	9589168	-0.638948	2.96555	-4.84274	6.63921e-05	0.000675627	1.56977	PREDICTED: transcription factor bHLH68-like n_1 Tax_Cicer arietinum RepID_UPI00032A6162	#N/A	#N/A	Medtr2g101520.1	BHLH transcription factor-like protein
Ca07942	Ca1	9616769	9619300	-0.455568	4.356	-6.32744	1.73914e-06	5.20552e-05	5.01765	PREDICTED: uncharacterized protein LOC101515592 n_1 Tax_Cicer arietinum RepID_UPI00032A5045	AT3G16200.1	#N/A	Medtr2g101480.1	transmembrane protein%2C putative
Ca07949	Ca1	9624002	9626775	-0.718291	4.84822	-4.79285	7.52335e-05	0.000734575	1.26165	PREDICTED: ALA-interacting subunit 1-like n_1 Tax_Cicer arietinum RepID_UPI00032A7311	AT1G79450.2	ALA-interacting subunit 5	Medtr2g101400.1	LEM3 (ligand-effect modulator 3) family protein
Ca07947	Ca1	9643675	9648743	0.684256	3.70316	6.50828	1.13259e-06	3.9963e-05	5.44914	PREDICTED: zinc phosphodiesterase ELAC protein 2 isoform X1 n_2 Tax_Cicer arietinum RepID_UPI00032AAD85	AT3G16260.1	tRNAse Z4	Medtr2g101390.1	zinc phosphodiesterase%2C putative
Ca08205	Ca1	10037259	10043896	0.362812	4.08984	6.05384	3.35124e-06	8.3346e-05	4.38047	Myosin-like protein n_3 Tax_Papilionoideae RepID_G7ZWG9_MEDTR	AT1G55170.1	#N/A	Medtr2g100240.9	myosin-like protein
Ca07972	Ca1	10053226	10056827	0.416125	4.63863	4.83916	6.6991e-05	0.000677663	1.37192	PREDICTED: uncharacterized protein LOC101508069 n_1 Tax_Cicer arietinum RepID_UPI00032AAD1E	AT1G55140.1	Ribonuclease III family protein	Medtr2g100220.1	ribonuclease III domain protein
Ca07983	Ca1	10230563	10235575	-0.469429	6.16847	-9.43167	1.97993e-09	5.71376e-07	11.7538	Casein kinase I-like protein n_3 Tax_Papilionoideae RepID_G7IS36_MEDTR	AT4G26100.1	casein kinase 1	Medtr2g099670.1	casein kinase I-like protein
Ca07995	Ca1	10302970	10306789	1.08466	3.14707	10.3154	3.61068e-10	1.90432e-07	13.4187	PREDICTED: nuclear transcription factor Y subunit A-3-like n_1 Tax_Cicer arietinum RepID_UPI00032AD2F9	AT1G72830.2	nuclear factor Y, subunit A3	Medtr2g099490.1	CCAAT-binding transcription factor
Ca08003	Ca1	10433547	10437577	-0.88172	4.64429	-10.8564	1.33456e-10	1.4089e-07	14.4167	PREDICTED: uncharacterized protein LOC101502274 n_1 Tax_Cicer arietinum RepID_UPI00032A56B0	AT1G08760.1	Plant protein of unknown function (DUF936)	Medtr2g099095.1	DUF936 family protein
Ca08006	Ca1	10440104	10443141	-0.758062	6.54703	-9.87606	8.31384e-10	3.26052e-07	12.6132	PREDICTED: hydroxyacylglutathione hydrolase 2 - mitochondrial-like isoform X1 n_2 Tax_Cicer arietinum RepID_UPI00032A6F87	AT1G06130.2	glyoxalase 2-4	Medtr2g099090.1	hydroxyacylglutathione hydrolase
Ca08002	Ca1	10466048	10467465	-1.04641	7.13086	-12.6368	6.33008e-12	1.61364e-08	17.3986	PREDICTED: B-box zinc finger protein 25-like n_1 Tax_Cicer arietinum RepID_UPI00032AB539	AT1G06040.2	B-box zinc finger family protein	Medtr2g099010.3	salt tolerance-like protein
Ca08040	Ca1	10693819	10697040	0.627285	5.5941	9.43531	1.96571e-09	5.71376e-07	11.7602	PREDICTED: uncharacterized protein LOC101488901 isoform X1 n_6 Tax_Cicer arietinum RepID_UPI00032ABA46	AT5G12930.1	#N/A	Medtr2g098330.1	hypothetical protein
Ca08043	Ca1	10851477	10855823	0.26412	4.37837	4.76748	8.01742e-05	0.000764981	1.21129	Polyadenylate-binding protein RBP47B n_3 Tax_Papilionoideae RepID_G7IUB4_MEDTR	AT5G19350.2	RNA-binding (RRM/RBD/RNP motifs) family protein	Medtr2g097960.1	polyadenylate-binding protein RBP47B
Ca08058	Ca1	10893759	10895610	0.393429	3.77606	4.91376	5.55775e-05	0.000592278	1.60081	Import inner membrane translocase protein n_2 Tax_Papilionoideae RepID_G7IRZ4_MEDTR	#N/A	#N/A	#N/A
Ca08057	Ca1	10933630	10937469	0.925802	2.81658	6.90069	4.52688e-07	2.2335e-05	6.44899	PREDICTED: protein TOC75 - chloroplastic-like n_1 Tax_Cicer arietinum RepID_UPI00032A90FE	AT3G46740.1	translocon at the outer envelope membrane of chloroplasts 75-III	Medtr2g097700.1	translocon at the outer envelope membrane ofs protein 75-III
Ca08066	Ca1	10949775	10957008	0.602588	5.49384	4.8103	7.20144e-05	0.000711014	1.30139	Nucleic acid binding NABP n_3 Tax_Papilionoideae RepID_Q2HS37_MEDTR	AT2G29190.2	pumilio 2	Medtr2g097670.2	pumilio Mpt5 protein%2C putative
Ca08072	Ca1	10994277	10996226	1.14974	4.03552	7.81628	5.75281e-08	5.78877e-06	8.42324	PREDICTED: uncharacterized protein C24B11.05-like n_1 Tax_Cicer arietinum RepID_UPI00032A7A50	AT5G59480.1	Haloacid dehalogenase-like hydrolase (HAD) superfamily protein	Medtr2g097520.1	haloacid dehalogenase-like hydrolase
Ca08068	Ca1	11051147	11053134	-1.11462	5.99777	-6.61689	8.77029e-07	3.30398e-05	5.68443	Uncharacterized protein n_2 Tax_Soja RepID_I1LK20_SOYBN	AT2G28950.1	expansin A6	Medtr2g097030.2	expansin A10
Ca08079	Ca1	11099850	11102131	0.407724	9.05163	4.80155	7.36104e-05	0.000722175	1.23259	PREDICTED: outer envelope pore protein 16 - chloroplastic n_1 Tax_Cicer arietinum RepID_UPI00032A611E	#N/A	#N/A	Medtr2g096920.1	outer envelope pore protein
Ca08133	Ca1	11596490	11600844	0.382935	2.80765	5.06538	3.8051e-05	0.000443929	2.07512	Uncharacterized protein n_10 Tax_Papilionoideae RepID_I1LTM0_SOYBN	AT2G28070.1	ABC-2 type transporter family protein	Medtr2g095390.1	white-brown-complex ABC transporter family protein
Ca08146	Ca1	11815658	11820763	0.315612	4.54575	5.8093	6.06393e-06	0.000123664	3.76841	PREDICTED: GATA transcription factor 11-like n_1 Tax_Cicer arietinum RepID_UPI00032A9041	AT1G08000.2	GATA transcription factor 10	Medtr2g094600.1	GATA type zinc finger transcription factor family protein
Ca08165	Ca1	11897978	11898747	1.04796	2.43552	6.16781	2.54744e-06	6.8597e-05	4.7836	PREDICTED: uncharacterized protein LOC101512341 n_1 Tax_Cicer arietinum RepID_UPI00032A5D36	AT5G60680.1	Protein of unknown function, DUF584	Medtr2g094410.1	senescence regulator
Ca08155	Ca1	11914717	11916305	0.890956	8.18047	5.60114	1.0092e-05	0.000172273	3.23798	Aquaporin n_5 Tax_Papilionoideae RepID_Q8W4T8_MEDTR	AT2G39010.1	plasma membrane intrinsic protein 2E	Medtr2g094270.2	major intrinsic protein (MIP) family transporter
Ca08169	Ca1	11996511	11997389	-1.71461	1.02271	-6.22135	2.2406e-06	6.28806e-05	4.96173	PREDICTED: fasciclin-like arabinogalactan protein 12 n_1 Tax_Cicer arietinum RepID_UPI00032A675E	AT5G60490.1	FASCICLIN-like arabinogalactan-protein 12	Medtr2g093970.1	fasciclin domain protein
Ca08223	Ca1	12270401	12287183	-0.459588	5.46836	-5.68202	8.27603e-06	0.000151032	3.44621	MAP kinase kinase kinase-like protein n_4 Tax_Papilionoideae RepID_G7IU31_MEDTR	AT2G31010.2	Protein kinase superfamily protein	Medtr2g092980.1	MAP kinase kinase kinase-like protein
Ca08217	Ca1	12339333	12343345	-0.914601	0.840047	-4.55033	0.000138271	0.00111308	1.10158	PREDICTED: cingulin-like n_1 Tax_Cicer arietinum RepID_UPI00032A814D	#N/A	#N/A	Medtr2g093010.1	frigida-LIKE protein
Ca08221	Ca1	12385111	12388994	1.15035	3.78499	6.72993	6.73119e-07	2.84402e-05	6.01935	PREDICTED: ketol-acid reductoisomerase - chloroplastic n_1 Tax_Cicer arietinum RepID_UPI00032ACB61	AT3G58610.3	ketol-acid reductoisomerase	Medtr4g079780.1	ketol-acid reductoisomerase
Ca08231	Ca1	12396335	12399313	-0.35262	3.30925	-5.56202	1.11109e-05	0.000182732	3.23713	Adaptin ear-binding coat-associated protein 1 n_2 Tax_Papilionoideae RepID_I3T5Y3_MEDTR	AT3G58600.1	Adaptin ear-binding coat-associated protein 1 NECAP-1	Medtr2g091185.1	adaptin ear-binding coat-associated protein 1
Ca08278	Ca1	12805312	12809575	0.411436	4.27701	7.03036	3.35765e-07	1.8659e-05	6.65029	PREDICTED: mannan endo-1 -4-beta-mannosidase 2 n_1 Tax_Cicer arietinum RepID_UPI00032ABF8F	AT2G20680.1	Glycosyl hydrolase superfamily protein	Medtr2g090390.1	glycoside hydrolase family 5 protein
Ca08274	Ca1	12902571	12907771	0.418436	5.07303	5.60515	9.99325e-06	0.000171161	3.26107	PREDICTED: probable L-type lectin-domain containing receptor kinase VII.2 n_1 Tax_Cicer arietinum RepID_UPI00032A5E96	AT4G04960.1	Concanavalin A-like lectin protein kinase family protein	Medtr2g090250.1	lectin receptor kinase
Ca08275	Ca1	12914818	12920018	0.423006	5.09735	5.58483	1.05048e-05	0.000175982	3.21122	PREDICTED: probable L-type lectin-domain containing receptor kinase VII.2 n_1 Tax_Cicer arietinum RepID_UPI00032A5E96	AT4G04960.1	Concanavalin A-like lectin protein kinase family protein	Medtr2g090250.1	lectin receptor kinase
Ca08312	Ca1	13320173	13322603	2.14221	4.88101	5.42048	1.57512e-05	0.000236191	2.81263	Xyloglucan endotransglucosylase/hydrolase n_4 Tax_Papilionoideae RepID_G7IRJ7_MEDTR	AT4G03210.2	xyloglucan endotransglucosylase/hydrolase 9,cell wall biogenesis	Medtr2g089140.2	xyloglucan endotransglucosylase/hydrolase family protein
Ca08321	Ca1	13420432	13425478	-0.652273	6.80743	-5.27415	2.2632e-05	0.000306048	2.45083	Beta-amylase n_1 Tax_Medicago truncatula RepID_G7IKM6_MEDTR	AT2G32290.1	beta-amylase 6	Medtr2g089030.1	beta-amylase
Ca08325	Ca1	13488825	13490076	-0.898844	6.74917	-7.76386	6.45464e-08	6.35543e-06	8.2889	PREDICTED: cyclin-U1-1 n_1 Tax_Cicer arietinum RepID_UPI00032A74F8	AT3G21870.1	cyclin p2;1	Medtr2g088860.1	cyclin p4
Ca08368	Ca1	13915355	13917760	1.29268	0.748098	4.79396	7.50247e-05	0.000734167	1.66492	PREDICTED: fasciclin-like arabinogalactan protein 15 n_1 Tax_Cicer arietinum RepID_UPI00032A9D04	AT2G35860.1	FASCICLIN-like arabinogalactan protein 16 precursor	Medtr2g087810.1	fasciclin-like arabinogalactan protein 16 precursor
Ca08373	Ca1	13979026	13981382	0.592535	6.60717	4.9685	4.84663e-05	0.000531774	1.69527	Chaperone dnaJ 3-like protein n_3 Tax_Pentapetalae RepID_A0A0B0ML43_GOSAR	AT3G44110.2	DNAJ homologue 3	Medtr2g087660.2	DnaJ-class molecular chaperone
Ca08376	Ca1	13990259	13992448	0.588631	2.15203	5.42381	1.5622e-05	0.000234945	3.0507	PREDICTED: uncharacterized protein LOC101490206 n_1 Tax_Cicer arietinum RepID_UPI00032A8D8B	AT5G22070.1	Core-2/I-branching beta-1,6-N-acetylglucosaminyltransferase family protein	Medtr2g087610.1	core-2/I-branching enzyme
Ca08386	Ca1	14098629	14102152	-0.779504	2.32665	-4.72712	8.87135e-05	0.000817886	1.29683	PREDICTED: probable receptor protein kinase TMK1 isoform X1 n_1 Tax_Cicer arietinum RepID_UPI00032A8BB8	AT2G01820.1	Leucine-rich repeat protein kinase family protein	Medtr2g087230.1	receptor kinase TMK1-like protein
Ca08387	Ca1	14118815	14125655	-0.635473	3.73237	-4.78445	7.68336e-05	0.000743778	1.3268	PREDICTED: serine/threonine-protein kinase Nek6-like isoform X1 n_2 Tax_Cicer arietinum RepID_UPI00032A85B4	AT3G44200.1	NIMA (never in mitosis, gene A)-related 6	Medtr2g087090.1	Serine/Threonine-kinase Nek4
Ca08393	Ca1	14245569	14247625	-0.98483	2.26074	-7.7477	6.68829e-08	6.46105e-06	8.33635	PREDICTED: uncharacterized protein LOC101502277 n_1 Tax_Cicer arietinum RepID_UPI00032AA613	AT5G22430.1	Pollen Ole e 1 allergen and extensin family protein	Medtr2g086680.1	pollen Ole e I family allergens
Ca08406	Ca1	14395809	14398593	-0.973191	0.662445	-4.84236	6.64558e-05	0.000675826	1.77886	PREDICTED: zinc finger protein WIP3-like n_1 Tax_Cicer arietinum RepID_UPI00032A831E	AT1G08290.1	WIP domain protein 3	Medtr1g093095.1	C2H2-type zinc finger protein
Ca08432	Ca1	14528538	14533308	0.64091	1.86642	5.19331	2.76666e-05	0.000354406	2.55418	PREDICTED: serine/threonine-protein kinase D6PKL2 n_1 Tax_Cicer arietinum RepID_UPI00032A7CD0	AT3G44610.1	Protein kinase superfamily protein	Medtr2g085065.1	Serine/Threonine kinase family protein
Ca08442	Ca1	14694645	14697629	1.09492	4.42308	4.75349	8.30367e-05	0.000783229	1.17067	PREDICTED: histone deacetylase HDT1-like n_1 Tax_Cicer arietinum RepID_UPI00032A9377	#N/A	#N/A	Medtr2g084815.4	histone deacetylase 2a%2C putative
Ca08555	Ca1	16008149	16009310	-0.402967	11.9546	-5.35426	1.85548e-05	0.000265976	2.49149	Chlorophyll a-b binding protein 13 - chloroplastic n_89 Tax_Mesangiospermae RepID_CB23_SOLLC	AT5G54270.1	light-harvesting chlorophyll B-binding protein 3	Medtr2g081090.1	light-harvesting complex I chlorophyll A/B-binding protein
Ca08581	Ca1	16413006	16422123	-0.28554	4.12144	-5.08641	3.61063e-05	0.000427104	2.00935	PREDICTED: plant intracellular Ras-group-related LRR protein 6 n_1 Tax_Cicer arietinum RepID_UPI00032A68F3	AT3G15410.1	Leucine-rich repeat (LRR) family protein	Medtr2g079560.2	LRR receptor-like kinase
Ca08587	Ca1	16575394	16580705	-0.42814	7.20268	-5.04805	3.97326e-05	0.000458303	1.89267	Ubiquitin ligase cop1 - putative n_2 Tax_Papilionoideae RepID_G7IRA7_MEDTR	AT3G15354.1	SPA1-related 3	Medtr2g085210.3	ubiquitin ligase cop1%2C putative
Ca08612	Ca1	16967115	16970641	-1.11961	2.51617	-4.79065	7.56498e-05	0.00073505	1.46911	PREDICTED: uncharacterized protein LOC101495491 n_1 Tax_Cicer arietinum RepID_UPI00032A5531	#N/A	#N/A	Medtr2g034750.2	cAMP-regulated phosphoprotein-like protein
Ca08643	Ca1	17137822	17141169	1.02832	5.38699	5.33824	1.93062e-05	0.000273184	2.60659	PREDICTED: probable polygalacturonase n_1 Tax_Cicer arietinum RepID_UPI00032A6D84	AT3G06770.3	Pectin lyase-like superfamily protein	Medtr2g435340.3	polygalacturonase/glycoside hydrolase family protein
Ca08663	Ca1	17506425	17514672	0.665273	4.24053	4.81649	7.09053e-05	0.00070285	1.32398	PREDICTED: putative E3 ubiquitin-protein ligase LIN-1 n_1 Tax_Cicer arietinum RepID_UPI00032A9A31	AT3G06880.2	Transducin/WD40 repeat-like superfamily protein	Medtr2g436530.1	E3 ubiquitin-protein ligase LIN-like protein%2C putative
Ca08664	Ca1	17577654	17586547	0.606254	4.70416	6.00762	3.74697e-06	8.97673e-05	4.23968	PREDICTED: ABC transporter C family member 14-like n_1 Tax_Cicer arietinum RepID_UPI00032A4E7D	AT3G62700.1	multidrug resistance-associated protein 10	Medtr2g436730.1	multidrug resistance protein ABC transporter family protein
Ca08682	Ca1	17821492	17822655	-1.07877	3.59011	-7.31343	1.76206e-07	1.23627e-05	7.39007	PREDICTED: B-box zinc finger protein 18-like n_1 Tax_Cicer arietinum RepID_UPI00032A9FC3	AT4G27310.1	B-box type zinc finger family protein	Medtr2g089310.1	B-box type zinc finger protein
Ca08718	Ca1	18237955	18241851	-0.591809	4.29193	-5.5973	1.01877e-05	0.000173143	3.26726	PREDICTED: haloacid dehalogenase-like hydrolase domain-containing protein 3 isoform X1 n_4 Tax_Cicer arietinum RepID_UPI0006414B91	AT5G44730.2	Haloacid dehalogenase-like hydrolase (HAD) superfamily protein	Medtr2g035440.4	haloacid dehalogenase-like hydrolase domain protein
Ca08747	Ca1	18562354	18569083	-0.374819	4.49079	-5.62996	9.40273e-06	0.000163426	3.33072	Uncharacterized protein n_14 Tax_Papilionoideae RepID_I1L2T5_SOYBN	AT5G60620.1	glycerol-3-phosphate acyltransferase 9	Medtr4g127910.1	phospholipid/glycerol acyltransferase family protein
Ca08782	Ca1	18942540	18953632	0.262262	5.53867	5.17458	2.89865e-05	0.000367924	2.20256	PREDICTED: pumilio homolog 6 - chloroplastic n_1 Tax_Cicer arietinum RepID_UPI0006412DFC	AT4G25880.1	pumilio 6	Medtr2g036900.2	pumilio-family RNA-binding repeatprotein
Ca08806	Ca1	19269335	19299035	0.419826	4.07663	5.71641	7.60785e-06	0.000143127	3.56032	PREDICTED: putative pentatricopeptide repeat-containing protein At3g01580 n_1 Tax_Cicer arietinum RepID_UPI00032A7025	AT3G01580.1	Tetratricopeptide repeat (TPR)-like superfamily protein	Medtr4g015760.4	PPR containing plant-like protein
Ca08857	Ca1	20119021	20124764	-0.487255	5.3333	-4.89578	5.81356e-05	0.000613654	1.51117	PREDICTED: uncharacterized protein LOC101498984 isoform X1 n_2 Tax_Cicer arietinum RepID_UPI0006411DC6	#N/A	#N/A	Medtr2g038710.1	hypothetical protein
Ca08864	Ca1	20218538	20225904	0.383018	5.49992	6.45208	1.29352e-06	4.3578e-05	5.29616	FVE n_14 Tax_Papilionoideae RepID_Q52ZH8_PEA	AT2G19520.1	Transducin family protein / WD-40 repeat family protein	Medtr2g039250.1	nucleosome/chromatin assembly factor group protein
Ca08960	Ca1	20578328	20606063	0.614698	6.97048	4.70145	9.46163e-05	0.000854788	1.03249	Nucleosome assembly protein n_7 Tax_Papilionoideae RepID_G7IIL4_MEDTR	AT4G23160.1	cysteine-rich RLK (RECEPTOR-like protein kinase) 8	Medtr2g039680.2	nucleosome assembly protein
Ca08899	Ca1	21148302	21156394	0.302436	4.22528	5.1957	2.75027e-05	0.000352783	2.27005	PREDICTED: tubulin--tyrosine ligase-like protein 12 isoform X1 n_2 Tax_Cicer arietinum RepID_UPI00032A9B0B	AT1G77550.1	tubulin-tyrosine ligases;tubulin-tyrosine ligases	Medtr2g041640.1	tubulin-tyrosine ligase family protein
Ca08914	Ca1	21369766	21373025	-0.526671	8.65412	-5.25939	2.34762e-05	0.000314421	2.38498	Light-harvesting complex I chlorophyll A/B-binding protein n_4 Tax_Papilionoideae RepID_G7IIP1_MEDTR	AT1G19150.1	photosystem I light harvesting complex gene 6	Medtr2g042720.1	light-harvesting complex I chlorophyll A/B-binding protein
Ca08949	Ca1	21875667	21882488	0.460806	2.72992	4.70006	9.49466e-05	0.000856255	1.18469	PREDICTED: DEAD-box ATP-dependent RNA helicase 17 isoform X1 n_2 Tax_Cicer arietinum RepID_UPI00032A63A8	AT2G40700.1	P-loop containing nucleoside triphosphate hydrolases superfamily protein	Medtr4g059460.1	DEAD-box ATP-dependent RNA helicase-like protein
Ca09029	Ca1	23022622	23023641	0.827337	0.364938	4.7539	8.29507e-05	0.000783168	1.56085	PREDICTED: uncharacterized protein LOC101497792 isoform X1 n_2 Tax_Cicer arietinum RepID_UPI00032A7D92	#N/A	#N/A	#N/A
Ca09030	Ca1	23083270	23087360	-0.384052	5.02656	-6.50777	1.13396e-06	3.9963e-05	5.42707	PREDICTED: aspartic proteinase-like isoform X1 n_2 Tax_Cicer arietinum RepID_UPI00032A864C	AT1G11910.1	aspartic proteinase A1	Medtr2g045420.1	fungal proteinase A%2C aspartic proteinase superfamily protein
Ca09041	Ca1	23293545	23300107	-1.09649	0.305163	-5.73415	7.2849e-06	0.000139812	3.7414	PREDICTED: CBL-interacting serine/threonine-protein kinase 1-like isoform X1 n_2 Tax_Cicer arietinum RepID_UPI00032A9BE7	AT3G17510.1	CBL-interacting protein kinase 1, response to osmotic stress, response to salt stress	Medtr4g123940.2	CBL-interacting kinase
Ca09044	Ca1	23322987	23326147	-0.986952	4.28187	-6.6396	8.31531e-07	3.19012e-05	5.76633	Mitochondrial pyruvate dehydrogenase kinase isoform 3 n_6 Tax_Papilionoideae RepID_A8I367_PEA	AT3G06483.1	pyruvate dehydrogenase kinase	Medtr2g045490.6	pyruvate dehydrogenase (acetyl-transferring) kinase
Ca09067	Ca1	23719009	23725792	2.068	2.84804	8.62277	1.02496e-08	1.76144e-06	10.152	Subtilisin-like serine protease n_2 Tax_Papilionoideae RepID_A0A072V7Z5_MEDTR	AT5G44530.1	Subtilase family protein	Medtr2g046740.1	subtilisin-like serine protease
Ca09113	Ca1	24413918	24417025	0.845949	4.75305	4.80302	7.33393e-05	0.00072044	1.29969	PREDICTED: uncharacterized protein LOC101489232 n_1 Tax_Cicer arietinum RepID_UPI00032A786A	AT4G20170.1	Domain of unknown function (DUF23)	Medtr2g437660.1	glycosyltransferase family 92 protein
Ca09190	Ca1	25708972	25720254	-0.50739	3.48005	-5.26583	2.31038e-05	0.000310521	2.51472	PREDICTED: uncharacterized protein LOC101505921 n_1 Tax_Cicer arietinum RepID_UPI00032ACA02	AT4G23160.1	cysteine-rich RLK (RECEPTOR-like protein kinase) 8	Medtr2g048360.3	DUF630 family protein
Ca09213	Ca1	25829545	25837257	0.845779	4.72602	8.49111	1.35034e-08	2.17435e-06	9.85433	PREDICTED: probable inositol transporter 2 isoform X1 n_2 Tax_Cicer arietinum RepID_UPI00032AAAD2	AT1G30220.1	inositol transporter 2	Medtr2g048720.1	inositol transporter 4
Ca09637	Ca1	26004037	26009343	0.633116	2.2412	5.29312	2.1591e-05	0.000295556	2.69044	PREDICTED: DNA-directed RNA polymerases I and III subunit RPAC1-like n_2 Tax_Cicer arietinum RepID_UPI00032A666F	AT1G60850.2	DNA-directed RNA polymerase family protein	Medtr3g060690.1	DNA-directed RNA polymerase
Ca09636	Ca1	26434914	26439869	-0.509365	4.77249	-5.11872	3.33124e-05	0.000402777	2.07378	PREDICTED: phytochrome E isoform X1 n_2 Tax_Cicer arietinum RepID_UPI00032AB8E9	AT4G18130.1	phytochrome E	Medtr2g049520.1	phytochrome protein
Ca09239	Ca1	26744123	26746354	-1.13471	5.04502	-10.758	1.59532e-10	1.43532e-07	14.2421	No Hits	AT2G34620.1	Mitochondrial transcription termination factor family protein	Medtr2g049780.1	transcription termination factor family protein
Ca09275	Ca1	27442503	27449511	0.814428	4.30272	6.92907	4.23958e-07	2.16871e-05	6.424	PREDICTED: DEAD-box ATP-dependent RNA helicase 51 n_1 Tax_Cicer arietinum RepID_UPI00032AD376	AT3G18600.1	P-loop containing nucleoside triphosphate hydrolases superfamily protein	Medtr2g055850.1	DEAD-box ATP-dependent RNA helicase-like protein
Ca09290	Ca1	27722609	27728099	-0.859974	3.22156	-6.93732	4.15957e-07	2.14869e-05	6.50588	PREDICTED: translation initiation factor eIF-2B subunit delta-like isoform X1 n_3 Tax_Cicer arietinum RepID_UPI00064129F1	AT5G38640.1	NagB/RpiA/CoA transferase-like superfamily protein	Medtr2g055750.5	translation initiation factor eIF-2B delta subunit
Ca09313	Ca1	28400475	28401947	-0.745632	3.93137	-5.38587	1.71586e-05	0.000251862	2.79979	Myb/SANT-like DNA-binding domain protein n_1 Tax_Medicago truncatula RepID_A0A072U248_MEDTR	#N/A	#N/A	Medtr7g094990.1	Myb/SANT-like DNA-binding domain protein
Ca09363	Ca1	29367196	29370878	0.810934	3.80262	8.12408	2.94791e-08	3.80807e-06	9.09237	PREDICTED: actin-related protein 6 n_1 Tax_Cicer arietinum RepID_UPI00032AAEF2	AT3G33520.1	actin-related protein 6	Medtr2g445210.2	actin-related protein ARP4
Ca09388	Ca1	30079192	30095158	0.825188	2.50863	5.778	6.54492e-06	0.000130175	3.86469	PREDICTED: truncated transcription factor CAULIFLOWER A-like n_1 Tax_Cicer arietinum RepID_UPI00032A89AD	AT4G23160.1	cysteine-rich RLK (RECEPTOR-like protein kinase) 8	Medtr2g461710.1	MADS-box transcription factor family protein
Ca09397	Ca1	30346856	30349560	1.89343	3.1101	8.00347	3.82502e-08	4.36595e-06	8.85172	Alpha-1 -4-glucan-protein synthase [UDP-forming]-like protein n_2 Tax_Papilionoideae RepID_A0A072V8I1_MEDTR	AT3G02230.1	reversibly glycosylated polypeptide 1	Medtr2g461970.1	alpha-1%2C4-glucan-protein synthase [UDP-forming]-like protein
Ca09442	Ca1	31071652	31084966	-0.331494	5.70409	-5.55016	1.14397e-05	0.000186734	3.12594	PREDICTED: uncharacterized methyltransferase At2g41040 - chloroplastic n_1 Tax_Cicer arietinum RepID_UPI00032A7C72	ATMG00860.1	DNA/RNA polymerases superfamily protein	Medtr1478s0010.1	hypothetical protein
Ca09549	Ca1	32878800	32884338	-0.445212	4.39038	-4.69572	9.59853e-05	0.00085954	1.03007	PREDICTED: origin of replication complex subunit 3 n_1 Tax_Cicer arietinum RepID_UPI00032A5B42	AT5G16690.1	origin recognition complex subunit 3	Medtr5g082610.1	origin recognition complex subunit 3
Ca09563	Ca1	33053234	33063653	-0.623593	4.77244	-7.23239	2.11698e-07	1.39566e-05	7.10588	PREDICTED: CBL-interacting serine/threonine-protein kinase 23 n_1 Tax_Cicer arietinum RepID_UPI00032A60A2	AT1G30270.1	CBL-interacting protein kinase 23, response to water deprivation, stomatal movement	Medtr2g049790.1	CBL-interacting kinase
Ca09608	Ca1	33624983	33627338	0.842886	3.4971	6.12631	2.81449e-06	7.3965e-05	4.55927	Ribosomal protein L7Ae/L30e/S12e/Gadd45 family protein n_1 Tax_Arabidopsis thaliana RepID_F4JRD3_ARATH	AT5G20160.3	Ribosomal protein L7Ae/L30e/S12e/Gadd45 family protein	Medtr0011s0330.1	ribosomal protein L7Ae/L30e/S12e/Gadd45 family protein
Ca09619	Ca1	33833821	33836238	-0.594221	4.41002	-5.40522	1.63568e-05	0.000243837	2.78589	Myb-like transcription factor family protein n_4 Tax_Papilionoideae RepID_A0A072U8X3_MEDTR	AT1G79430.2	Homeodomain-like superfamily protein	Medtr6g444980.2	myb-like transcription factor family protein
Ca09735	Ca1	35653139	35659445	-0.315809	7.06101	-5.39088	1.69471e-05	0.000249716	2.73663	PREDICTED: ABC transporter D family member 2 - chloroplastic isoform X2 n_1 Tax_Cicer arietinum RepID_UPI000640C697	AT1G54350.1	ABC transporter family protein	Medtr2g062790.1	ABC transporter D family protein
Ca09791	Ca1	36569377	36590348	-0.675672	2.39372	-5.35347	1.85913e-05	0.000266249	2.84148	PREDICTED: putative callose synthase 8 n_1 Tax_Cicer arietinum RepID_UPI0006416D03	AT4G23160.1	cysteine-rich RLK (RECEPTOR-like protein kinase) 8	Medtr2g072160.1	callose synthase-like protein
Ca09810	Ca1	37110084	37115096	-0.513669	4.6921	-7.46806	1.24444e-07	9.96533e-06	7.6365	Mitogen-activated protein kinase n_7 Tax_Papilionoideae RepID_Q9XF36_MEDSA	AT1G53510.1	mitogen-activated protein kinase 18	Medtr2g072840.2	MAP kinase-like protein
Ca09847	Ca1	37634516	37643151	-0.409215	6.67463	-6.54633	1.03538e-06	3.74377e-05	5.52197	Probable bifunctional methylthioribulose-1-phosphate dehydratase/enolase-phosphatase E1 n_3 Tax_Papilionoideae RepID_I3SWS0_MEDTR	AT5G53850.2	haloacid dehalogenase-like hydrolase family protein	Medtr2g079110.1	methylthioribulose-1-phosphate dehydratase
Ca09869	Ca1	37786446	37789558	0.587528	3.01934	4.87987	6.04974e-05	0.000631417	1.6224	Branched-chain-amino-acid aminotransferase-like protein n_3 Tax_Papilionoideae RepID_I3SQ86_MEDTR	AT5G57850.1	D-aminoacid aminotransferase-like PLP-dependent enzymes superfamily protein	Medtr2g078730.1	branched-chain-amino-acid aminotransferase-like protein
Ca09889	Ca1	37914637	37996310	-1.14928	6.92799	-6.18114	2.46723e-06	6.72884e-05	4.65487	PREDICTED: terpene synthase 10-like isoform X1 n_4 Tax_Cicer arietinum RepID_UPI00032A5DE4	AT4G23160.1	cysteine-rich RLK (RECEPTOR-like protein kinase) 8	Medtr2g017850.1	hypothetical protein
Ca09890	Ca1	38026326	38031525	0.950878	3.64857	6.26421	2.0223e-06	5.82253e-05	4.9104	Glyceraldehyde-3-phosphate dehydrogenase n_4 Tax_Papilionoideae RepID_G7IQT1_MEDTR	AT1G79530.1	glyceraldehyde-3-phosphate dehydrogenase of plastid 1	Medtr2g065470.3	glyceraldehyde-3-phosphate dehydrogenase
Ca09893	Ca1	38298230	38304720	-0.602806	6.34965	-4.69213	9.68534e-05	0.000864783	1.01236	PREDICTED: uncharacterized protein LOC101511072 n_1 Tax_Cicer arietinum RepID_UPI00032AA737	AT1G79570.1	Protein kinase superfamily protein with octicosapeptide/Phox/Bem1p domain	Medtr8g442400.1	octicosapeptide/phox/Bem1p domain kinase superfamily protein
Ca09933	Ca1	38466564	38569469	-0.433658	7.32686	-6.47588	1.22269e-06	4.16506e-05	5.35278	Sulfurtransferase n_2 Tax_Papilionoideae RepID_G8A093_MEDTR	AT3G01660.1	S-adenosyl-L-methionine-dependent methyltransferases superfamily protein	Medtr7g032900.1	methyltransferase type 11
Ca09932	Ca1	38583934	38588303	0.699193	2.83839	5.03763	4.07799e-05	0.000467212	1.99708	PREDICTED: GATA zinc finger domain-containing protein 14 n_1 Tax_Cicer arietinum RepID_UPI00032AA2C1	AT5G18440.2	#N/A	Medtr2g067220.2	nuclear fragile X mental retardation-interacting protein
Ca09910	Ca1	38711732	38713597	-0.57114	3.17739	-6.524	1.09134e-06	3.89092e-05	5.56307	PREDICTED: uncharacterized protein LOC101489878 n_1 Tax_Cicer arietinum RepID_UPI00032A5316	AT1G79160.1	PTHR33177:SF6 - F3O9.30 (1 of 2)	Medtr2g066700.1	YUP8H12R.23 protein%2C putative
Ca09962	Ca1	39531977	39535801	0.497977	4.09991	6.87406	4.81464e-07	2.33038e-05	6.2995	PREDICTED: pentatricopeptide repeat-containing protein At1g20230-like - partial n_1 Tax_Cicer arietinum RepID_UPI00032A8837	AT1G20230.1	Pentatricopeptide repeat (PPR) superfamily protein	Medtr7g076350.1	pentatricopeptide (PPR) repeat protein
Ca10010	Ca1	40426088	40432821	-0.519518	7.2863	-7.34588	1.6376e-07	1.19272e-05	7.35858	PREDICTED: lycopene epsilon cyclase - chloroplastic n_1 Tax_Cicer arietinum RepID_UPI00032AA629	AT5G57030.1	Lycopene beta/epsilon cyclase protein	Medtr2g040060.1	lycopene epsilon cyclase
Ca10013	Ca1	40545989	40549161	-0.589796	5.59134	-4.75416	8.28967e-05	0.000783168	1.16131	PREDICTED: probable protein phosphatase 2C 53 n_1 Tax_Cicer arietinum RepID_UPI00032AC94A	AT1G72770.3	homology to ABI1	Medtr2g040500.1	protein phosphatase 2C ABI2-like protein
Ca10033	Ca1	40759816	40765747	-0.616642	6.5148	-5.11249	3.3834e-05	0.000407794	2.05253	PREDICTED: protein FAR1-RELATED SEQUENCE 6-like n_1 Tax_Cicer arietinum RepID_UPI00032ACF5E	#N/A	#N/A	Medtr7g056020.1	F-box/RNI/FBD-like domain protein
Ca10116	Ca1	42351960	42352738	-1.02644	1.13996	-6.37959	1.53619e-06	4.85878e-05	5.29381	No Hits	#N/A	#N/A	#N/A
Ca10118	Ca1	42352827	42354214	-0.85329	1.3101	-6.34522	1.66705e-06	5.09951e-05	5.24086	No Hits	#N/A	#N/A	#N/A
Ca10137	Ca1	42751770	42762243	3.87731	1.0061	6.62452	8.61474e-07	3.26104e-05	5.77366	PREDICTED: probable flavin-containing monooxygenase 1 n_1 Tax_Cicer arietinum RepID_UPI00032A780D	AT4G23160.1	cysteine-rich RLK (RECEPTOR-like protein kinase) 8	Medtr2g450310.1	flavin-binding monooxygenase-like protein
Ca10177	Ca1	43329667	43335468	0.57864	5.31813	6.89624	4.57377e-07	2.24938e-05	6.33386	PREDICTED: 1-acyl-sn-glycerol-3-phosphate acyltransferase 1 - chloroplastic n_1 Tax_Cicer arietinum RepID_UPI00032A5678	AT4G30580.1	Phospholipid/glycerol acyltransferase family protein	Medtr5g043620.1	1-acyl-sn-glycerol-3-phosphate acyltransferase
Ca10281	Ca1	44736077	44738646	1.06926	3.36842	5.9351	4.46611e-06	0.000102875	4.13743	PREDICTED: uncharacterized protein LOC101515712 isoform X3 n_1 Tax_Cicer arietinum RepID_UPI00032A7088	AT2G24300.2	Calmodulin-binding protein	Medtr2g450080.1	calmodulin-binding protein
Ca10321	Ca1	45884627	45892640	0.334651	5.29528	5.32414	1.99924e-05	0.00027951	2.56996	Serine/Threonine kinase receptor-associated-like protein n_3 Tax_Papilionoideae RepID_A0A072V826_MEDTR	AT3G15610.1	Transducin/WD40 repeat-like superfamily protein	Medtr2g054920.1	Serine/Threonine kinase receptor-associated-like protein
Ca10355	Ca1	47058266	47077260	-0.328032	7.96505	-4.82238	6.98675e-05	0.000695266	1.32082	PREDICTED: adenylate kinase 5 - chloroplastic n_1 Tax_Cicer arietinum RepID_UPI00032AAFE8	AT4G23160.1	cysteine-rich RLK (RECEPTOR-like protein kinase) 8	Medtr3g093120.1	SPFH domain/band 7 family protein
Ca10380	Ca1	47465603	47468720	0.891991	1.32233	5.48665	1.33772e-05	0.000208321	3.23905	PREDICTED: protein SRG1-like n_1 Tax_Cicer arietinum RepID_UPI00032AA2B3	AT1G17020.1	senescence-related gene 1	Medtr2g072890.1	2OG-Fe(II) oxygenase family oxidoreductase
Ca10393	Ca1	47591928	47595869	-0.53027	4.25735	-7.22401	2.15766e-07	1.41637e-05	7.09582	PREDICTED: uncharacterized protein LOC101511922 n_1 Tax_Cicer arietinum RepID_UPI00032AAEAC	AT1G78620.1	Protein of unknown function DUF92, transmembrane	Medtr2g073380.1	integral membrane family protein
Ca10416	Ca1	47809761	47819443	-0.39575	5.29733	-5.33783	1.93256e-05	0.000273184	2.6028	Uncharacterized protein n_2 Tax_Papilionoideae RepID_G7IR00_MEDTR	AT4G23160.1	cysteine-rich RLK (RECEPTOR-like protein kinase) 8	Medtr2g075340.1	hypothetical protein
Ca10417	Ca1	47847747	47850642	0.657726	2.06384	5.65664	8.80701e-06	0.000156268	3.53605	PREDICTED: uncharacterized protein LOC101489138 n_2 Tax_Cicer arietinum RepID_UPI00032AC90E	#N/A	#N/A	Medtr2g075470.2	plant/T3F20-21 protein%2C putative
Ca10425	Ca1	47975432	47979623	-0.553438	2.76923	-5.09062	3.57295e-05	0.000423958	2.171	PREDICTED: ubiquitin domain-containing protein 2 n_1 Tax_Cicer arietinum RepID_UPI00032A58B3	AT1G53400.1	Ubiquitin domain-containing protein	Medtr2g075840.1	ubiquitin domain protein
Ca10461	Ca1	48525489	48528520	1.11425	5.45936	5.51832	1.23728e-05	0.000196718	3.04841	Nucleolar GTP-binding protein 1 n_10 Tax_Papilionoideae RepID_V7AEK0_PHAVU	AT1G50920.1	Nucleolar GTP-binding protein	Medtr8g018150.1	nucleolar GTP-binding-like protein
Ca10462	Ca1	48530164	48534595	-0.263446	7.97581	-4.80108	7.3698e-05	0.000722571	1.26951	PREDICTED: protein DJ-1 homolog B n_1 Tax_Cicer arietinum RepID_UPI00032A7209	AT1G53280.1	Class I glutamine amidotransferase-like superfamily protein	Medtr2g078060.1	class I glutamine amidotransferase superfamily protein
Ca10460	Ca1	48547265	48550470	0.567196	5.92408	5.43951	1.50277e-05	0.000228478	2.8569	PREDICTED: multiple organellar RNA editing factor 8 - chloroplastic/mitochondrial n_1 Tax_Cicer arietinum RepID_UPI00032A7474	AT3G15000.1	cobalt ion binding	Medtr2g078090.1	plastid developmental protein DAG
Ca10470	Ca1	48642176	48645287	-0.82213	3.64403	-5.58493	1.05021e-05	0.000175982	3.28434	PREDICTED: uncharacterized protein LOC101504963 isoform X1 n_2 Tax_Cicer arietinum RepID_UPI00032AC30E	#N/A	#N/A	Medtr2g078220.1	hypothetical protein
Ca10481	Ca1	48690155	48695604	0.500426	6.09258	6.25918	2.04674e-06	5.87332e-05	4.84134	Proliferation-associated 2G4-like protein n_4 Tax_Papilionoideae RepID_A0A072V9Z9_MEDTR	AT3G51800.2	metallopeptidase M24 family protein	Medtr2g078290.1	proliferation-associated 2G4-like protein
Ca28683	Ca2	97407	103050	-0.403297	6.3362	-4.94879	5.09145e-05	0.000551904	1.64731	PREDICTED: protein TWIN LOV 1 isoform X1 n_2 Tax_Cicer arietinum RepID_UPI00032AC64E	AT2G02710.3	PAS/LOV protein B	Medtr5g038420.5	TWIN LOV protein
Ca28699	Ca2	302021	306115	0.514686	5.17867	5.29	2.17586e-05	0.000297141	2.4916	Uncharacterized protein n_12 Tax_Papilionoideae RepID_I1J5M4_SOYBN	AT1G14370.1	protein kinase 2A	Medtr5g038870.1	Serine/Threonine kinase family protein
Ca28710	Ca2	563957	564523	-1.11517	3.1295	-5.67034	8.51617e-06	0.00015333	3.58701	PREDICTED: uncharacterized protein LOC101512365 n_1 Tax_Cicer arietinum RepID_UPI00032A5AAA	#N/A	#N/A	#N/A
Ca28788	Ca2	1466470	1475501	0.313687	5.68324	4.88811	5.92622e-05	0.000620832	1.49441	PREDICTED: uncharacterized protein LOC101507145 isoform X1 n_2 Tax_Cicer arietinum RepID_UPI00032A57F8	AT2G03150.1	ATP/GTP-binding protein family	Medtr5g042000.1	ATP/GTP-binding family protein%2C putative
Ca28796	Ca2	1499355	1500815	-0.486538	4.42631	-7.02344	3.41144e-07	1.8769e-05	6.64774	PREDICTED: uncharacterized protein LOC101507654 n_1 Tax_Cicer arietinum RepID_UPI00032A8185	AT1G26761.1	Arabinanase/levansucrase/invertase	Medtr5g042100.1	arabinanase/levansucrase/invertase%2C putative
Ca28817	Ca2	1776250	1781345	1.01764	2.76517	6.69467	7.30927e-07	2.99661e-05	5.96462	PREDICTED: protein argonaute 7 n_1 Tax_Cicer arietinum RepID_UPI00032A5FD2	AT1G69440.1	Argonaute family protein	Medtr5g042590.1	eukaryotic translation initiation factor 2c
Ca28842	Ca2	2004957	2010441	-0.452215	2.5645	-4.96648	4.87123e-05	0.000533706	1.88773	Uncharacterized protein n_11 Tax_Papilionoideae RepID_I1JE95_SOYBN	AT1G26640.1	Amino acid kinase family protein	Medtr5g042980.2	amino acid kinase family protein
Ca28852	Ca2	2013448	2022406	1.01426	5.04291	8.03032	3.6089e-08	4.24247e-06	8.87005	PREDICTED: mitotic checkpoint protein BUB3.3-like n_1 Tax_Cicer arietinum RepID_UPI000640E2E0	AT1G13950.1	eukaryotic elongation factor 5A-1	Medtr5g043000.1	transducin/WD40 repeat protein
Ca28849	Ca2	2043531	2046533	0.962166	3.25637	5.42458	1.55924e-05	0.000234874	2.9445	DUF538 family protein n_4 Tax_Papilionoideae RepID_G7JWQ2_MEDTR	AT2G03350.1	Protein of unknown function, DUF538	Medtr5g043190.1	DUF538 family protein
Ca28855	Ca2	2135030	2139929	-0.443309	4.66461	-6.58589	9.43301e-07	3.50189e-05	5.61488	PREDICTED: uncharacterized protein LOC101493792 n_1 Tax_Cicer arietinum RepID_UPI00032A94BC	AT1G69360.1	Plant protein of unknown function (DUF863)	Medtr5g043430.1	DUF863 family protein
Ca28863	Ca2	2155122	2159207	-0.445665	6.55323	-5.86788	5.25798e-06	0.000112951	3.90262	PREDICTED: uncharacterized protein LOC101494419 isoform X1 n_2 Tax_Cicer arietinum RepID_UPI00032A524A	AT2G03390.1	uvrB/uvrC motif-containing protein	Medtr5g043480.2	UvrB/uvrC domain protein
Ca28864	Ca2	2179027	2183384	0.442398	2.44725	5.01242	4.34291e-05	0.000490582	1.99222	PREDICTED: 26S proteasome non-ATPase regulatory subunit 10 n_1 Tax_Cicer arietinum RepID_UPI00032A7264	AT2G03430.1	Ankyrin repeat family protein	Medtr5g043640.1	26S proteasome non-ATPase regulatory subunit 10
Ca28942	Ca2	3018314	3021348	-0.329697	6.59524	-5.32089	2.01542e-05	0.00028049	2.56682	Uncharacterized protein n_3 Tax_Papilionoideae RepID_G7JZ19_MEDTR	#N/A	#N/A	#N/A
Ca28961	Ca2	3186428	3190210	0.880556	4.532	5.07279	3.73545e-05	0.000438478	1.95483	PREDICTED: fructokinase-like 2 - chloroplastic n_1 Tax_Cicer arietinum RepID_UPI00032AABA1	AT1G69200.1	fructokinase-like 2	Medtr5g044990.1	pfkB family carbohydrate kinase
Ca28952	Ca2	3190418	3193141	0.598783	1.52099	4.83292	6.8046e-05	0.000684262	1.69076	PREDICTED: folate synthesis bifunctional protein - mitochondrial n_1 Tax_Cicer arietinum RepID_UPI00032AA15E	AT4G30000.1	Dihydropterin pyrophosphokinase / Dihydropteroate synthase	Medtr5g044980.1	dihydropterin pyrophosphokinase/dihydropteroate synthase
Ca29113	Ca2	5366313	5371227	-1.11993	1.99395	-9.55864	1.54128e-09	4.71479e-07	11.9194	Protein NSP-INTERACTING KINASE 2 n_7 Tax_Phaseoleae RepID_A0A0B2PJ86_GLYSO	AT5G16000.1	NSP-interacting kinase 1	Medtr0049s0070.2	NSP-interacting kinase-like protein
Ca29248	Ca2	7645930	7651447	-0.473621	6.50974	-4.98214	4.68419e-05	0.000518039	1.73057	Cryptochrome protein n_18 Tax_Papilionoideae RepID_A2Q6E2_MEDTR	AT4G08920.1	cryptochrome 1	Medtr5g063920.3	cryptochrome protein
Ca29269	Ca2	7972513	7975036	-0.195735	8.36253	-4.79172	7.54477e-05	0.00073505	1.2402	14-3-3-like protein A n_20 Tax_Pentapetalae RepID_1433A_VICFA	AT1G78300.1	general regulatory factor 2	Medtr5g064580.1	general regulatory factor 2
Ca29331	Ca2	8866225	8869510	-0.387553	5.62215	-5.36768	1.79486e-05	0.000259966	2.67896	Transport inhibitor response protein - putative n_2 Tax_Papilionoideae RepID_G7KBF5_MEDTR	AT5G49980.1	auxin F-box protein 5	Medtr5g065490.1	transport inhibitor response protein%2C putative
Ca29368	Ca2	9204741	9208371	0.484	6.48925	5.35085	1.87123e-05	0.000267256	2.63939	PREDICTED: transcription factor bHLH143-like isoform X1 n_1 Tax_Cicer arietinum RepID_UPI00032A9CCF	AT5G50010.1	sequence-specific DNA binding transcription factors;transcription regulators	Medtr5g065670.1	transcription factor
Ca29382	Ca2	9501287	9509470	-0.549563	7.91711	-4.97342	4.78742e-05	0.000526789	1.69684	Glucose-6-phosphate isomerase n_2 Tax_Papilionoideae RepID_G7KBI3_MEDTR	AT4G24620.2	phosphoglucose isomerase 1	Medtr5g065880.1	glucose-6-phosphate isomerase
Ca29392	Ca2	9780191	9787148	-0.329474	2.87428	-4.63214	0.000112592	0.000959803	1.01669	PREDICTED: ubiquitin carboxyl-terminal hydrolase 16-like n_1 Tax_Cicer arietinum RepID_UPI00032A5E73	AT4G24560.1	ubiquitin-specific protease 16	Medtr5g066000.1	ubiquitin carboxy-terminal hydrolase
Ca29416	Ca2	10135876	10138012	0.427854	2.47739	5.16752	2.94999e-05	0.000372278	2.39424	PREDICTED: uncharacterized protein LOC101505615 n_1 Tax_Cicer arietinum RepID_UPI00032A65F8	#N/A	#N/A	Medtr5g066450.2	hydroxyproline-rich glycoprotein family protein%2C putative
Ca29451	Ca2	10608565	10615223	-0.551912	5.01762	-5.90604	4.79244e-06	0.00010751	3.99057	Serine hydroxymethyltransferase n_4 Tax_Papilionoideae RepID_G7K5Z4_MEDTR	AT5G26780.3	serine hydroxymethyltransferase 2	Medtr5g067060.1	serine transhydroxymethyltransferase
Ca29465	Ca2	10854585	10858309	-0.678224	8.36421	-6.64373	8.23503e-07	3.19012e-05	5.73639	Glutamyl-tRNA reductase n_2 Tax_Papilionoideae RepID_B7FLG0_MEDTR	AT1G58290.1	Glutamyl-tRNA reductase family protein	Medtr5g067410.1	glutamyl-tRNA reductase
Ca29473	Ca2	11054939	11058771	-0.337363	2.85763	-5.89533	4.91867e-06	0.000108873	4.09321	PREDICTED: rhodanese-like domain-containing protein 7 n_1 Tax_Cicer arietinum RepID_UPI00032AB4B5	AT2G40760.1	Rhodanese/Cell cycle control phosphatase superfamily protein	Medtr5g067730.2	rhodanese-related sulfurtransferase
Ca29481	Ca2	11164018	11169854	-0.404279	7.39721	-5.66609	8.60537e-06	0.00015423	3.4072	ABC1 family kinase n_2 Tax_Papilionoideae RepID_G7KD96_MEDTR	AT5G05200.1	Protein kinase superfamily protein	Medtr5g068050.1	ABC1 family kinase
Ca29502	Ca2	11434072	11436096	-0.402053	6.16918	-4.88485	5.97483e-05	0.000625069	1.4863	PREDICTED: L-type lectin-domain containing receptor kinase VIII.1-like n_1 Tax_Cicer arietinum RepID_UPI00032A8D0B	AT5G01560.1	lectin receptor kinase a4.3	Medtr5g068770.1	lectin-like receptor kinase%2C putative
Ca29508	Ca2	11441414	11444041	-0.858083	4.3846	-7.64406	8.40887e-08	7.65557e-06	8.0398	PREDICTED: zinc finger with UFM1-specific peptidase domain protein-like isoform X1 n_2 Tax_Cicer arietinum RepID_UPI00032AA107	AT5G24680.1	Peptidase C78, ubiquitin fold modifier-specific peptidase 1/ 2	Medtr5g068730.1	zinc finger with UFM1-specific peptidase domain protein
Ca29569	Ca2	12190019	12192116	-0.465681	4.84084	-5.38234	1.73091e-05	0.0002531	2.71652	PREDICTED: cytochrome P450 CYP736A12-like n_3 Tax_Cicer arietinum RepID_UPI000640F9E7	AT4G36220.1	ferulic acid 5-hydroxylase 1	Medtr5g070700.1	cytochrome P450 family 71 protein
Ca29577	Ca2	12341676	12348163	-0.559243	4.22815	-4.71646	9.11195e-05	0.000833038	1.08794	Uncharacterized protein n_1 Tax_Phaseolus angularis RepID_A0A0L9UY07_PHAAN	AT1G19720.1	Pentatricopeptide repeat (PPR-like) superfamily protein	Medtr5g071190.1	PPR containing plant-like protein
Ca29585	Ca2	12412663	12416230	-1.05618	0.488124	-5.40361	1.64219e-05	0.000244331	3.06323	PREDICTED: protein PMR5-like n_1 Tax_Cicer arietinum RepID_UPI00032A7351	AT5G58600.2	Plant protein of unknown function (DUF828)	Medtr5g071350.1	Pmr5/Cas1p GDSL/SGNH-like acyl-esterase family protein
Ca29594	Ca2	12548956	12551744	-0.350376	2.82436	-5.85444	5.43276e-06	0.000115241	4.00526	PREDICTED: U11/U12 small nuclear ribonucleoprotein 31 kDa protein n_1 Tax_Cicer arietinum RepID_UPI00032AA40A	#N/A	#N/A	Medtr5g071540.1	RNA-binding (RRM/RBD/RNP motif) family protein
Ca29615	Ca2	12835932	12839695	0.413504	3.95263	5.54448	1.16007e-05	0.000188157	3.15827	PREDICTED: serine carboxypeptidase-like 42 n_1 Tax_Cicer arietinum RepID_UPI00032A74D6	AT5G42240.1	serine carboxypeptidase-like 42	Medtr5g072570.1	serine carboxypeptidase-like protein
Ca29617	Ca2	12845783	12848840	-0.901578	4.6124	-8.54851	1.19706e-08	2.01198e-06	9.97949	Uncharacterized protein n_1 Tax_Medicago truncatula RepID_A0A072UBB0_MEDTR	#N/A	#N/A	#N/A
Ca29613	Ca2	12874258	12875598	0.613737	1.7214	5.29467	2.15082e-05	0.000295038	2.53407	PREDICTED: protein CHLOROPLAST IMPORT APPARATUS 2 isoform X2 n_1 Tax_Cicer arietinum RepID_UPI00032A6E78	AT1G07050.1	CCT motif family protein	Medtr5g072780.1	CCT motif protein
Ca29636	Ca2	13054016	13057864	0.406081	3.72669	4.73289	8.74385e-05	0.00081102	1.16632	PREDICTED: adenylosuccinate lyase-like n_1 Tax_Cicer arietinum RepID_UPI00032A4D76	AT4G18440.1	L-Aspartase-like family protein	Medtr7g092860.3	adenylosuccinate lyase
Ca29653	Ca2	13355036	13356295	2.74621	1.76076	7.39942	1.45163e-07	1.1066e-05	7.45936	PREDICTED: trans-resveratrol di-O-methyltransferase-like n_1 Tax_Cicer arietinum RepID_UPI00032A5AF4	AT4G35160.1	O-methyltransferase family protein,melatonin biosynthetic process, methylation	Medtr5g074580.1	orcinol O-methyltransferase
Ca29695	Ca2	13800406	13804891	1.3903	7.30265	8.0536	3.43178e-08	4.133e-06	8.91078	Trans-cinnamate 4-monooxygenase n_14 Tax_Papilionoideae RepID_TCMO_CICAR	AT2G30490.1	cinnamate-4-hydroxylase	Medtr5g075450.1	cytochrome P450 family cinnamate 4-hydroxylase
Ca29714	Ca2	14099412	14102160	0.657582	3.08844	5.3982	1.66431e-05	0.000247142	2.87896	Receptor-like kinase n_2 Tax_Papilionoideae RepID_G7K0V8_MEDTR	AT5G58300.2	Leucine-rich repeat protein kinase family protein	Medtr5g075630.1	receptor-like kinase
Ca29716	Ca2	14151171	14154668	0.271545	6.24027	5.29376	2.15569e-05	0.000295442	2.4991	Uncharacterized protein n_4 Tax_Papilionoideae RepID_I3S109_MEDTR	AT5G05370.1	Cytochrome b-c1 complex, subunit 8 protein	Medtr5g075690.1	cytochrome B-c1 complex%2C subunit 8
Ca29742	Ca2	14438364	14442591	-0.420403	8.50908	-7.86076	5.21892e-08	5.29055e-06	8.48884	Squalene/phytoene synthase n_2 Tax_Papilionoideae RepID_G7KFR8_MEDTR	AT5G17230.2	PHYTOENE SYNTHASE	Medtr5g076620.7	squalene/phytoene synthase
Ca29753	Ca2	14512574	14516145	1.86948	3.86303	5.50377	1.28245e-05	0.000202217	3.17401	PREDICTED: protein REVEILLE 2 isoform X1 n_2 Tax_Cicer arietinum RepID_UPI00032AA309	#N/A	#N/A	Medtr5g076960.2	myb transcription factor
Ca29749	Ca2	14531736	14539346	0.227777	9.06774	4.92877	5.35289e-05	0.000573738	1.5509	UTP-glucose-1-phosphate uridylyltransferase n_2 Tax_Medicago truncatula RepID_G7KFV1_MEDTR	AT3G03250.1	UDP-GLUCOSE PYROPHOSPHORYLASE 1	Medtr5g077000.1	UTP-glucose-1-phosphate uridylyltransferase
Ca29854	Ca2	15785406	15793418	-0.455497	5.20995	-5.76393	6.77373e-06	0.000133511	3.64527	PREDICTED: pyridoxal kinase isoform X1 n_2 Tax_Cicer arietinum RepID_UPI00032A4FA3	#N/A	#N/A	Medtr5g079730.2	pyridoxal kinase
Ca29875	Ca2	16108233	16109905	0.616485	1.37118	4.55276	0.000137429	0.00110981	1.06982	PREDICTED: rRNA methyltransferase 2 - mitochondrial n_1 Tax_Cicer arietinum RepID_UPI00032A84AE	AT5G13830.1	FtsJ-like methyltransferase family protein	Medtr5g080020.1	ribosomal RNA large subunit methyltransferase
Ca29889	Ca2	16196351	16199779	0.807141	6.29144	5.80351	6.15019e-06	0.000124758	3.74446	23S rRNA m2A2503 methyltransferase n_2 Tax_Papilionoideae RepID_G7KBR0_MEDTR	AT2G39670.2	Radical SAM superfamily protein	Medtr5g079860.1	23S rRNA m2A2503 methyltransferase
Ca29884	Ca2	16273197	16276791	-0.481784	7.0695	-6.36984	1.5722e-06	4.92761e-05	5.10316	Uncharacterized protein n_8 Tax_Pentapetalae RepID_M1B9V2_SOLTU	AT2G39770.2	Glucose-1-phosphate adenylyltransferase family protein	Medtr5g080770.1	mannose-1-phosphate guanylyltransferase-like protein
Ca29882	Ca2	16283109	16285311	1.07082	2.87014	6.47836	1.21554e-06	4.14992e-05	5.44306	PREDICTED: uncharacterized protein At2g39795 - mitochondrial-like n_1 Tax_Cicer arietinum RepID_UPI00032A9C67	AT3G55605.1	Mitochondrial glycoprotein family protein	Medtr5g080880.1	glycoprotein family protein
Ca29905	Ca2	16393840	16398580	-1.78412	3.144	-8.02279	3.66825e-08	4.24247e-06	8.90012	PREDICTED: uncharacterized protein LOC101512469 isoform X1 n_2 Tax_Cicer arietinum RepID_UPI00032A5CDA	#N/A	#N/A	#N/A
Ca29904	Ca2	16447330	16449552	1.34182	4.68062	6.7402	6.57189e-07	2.8156e-05	5.98946	PREDICTED: uncharacterized protein LOC101513331 n_1 Tax_Cicer arietinum RepID_UPI00032A8771	#N/A	#N/A	Medtr5g081460.1	hypothetical protein
Ca29911	Ca2	16552889	16556589	0.616259	4.96519	4.70602	9.35377e-05	0.000849056	1.04414	60S ribosomal L35a-1-like protein n_3 Tax_rosids RepID_A0A0B0N9V3_GOSAR	AT1G74270.1	Ribosomal protein L35Ae family protein	Medtr5g081705.1	60S ribosomal protein L35a-3
Ca29934	Ca2	16783760	16789411	0.525024	3.83087	4.67371	0.000101436	0.000892157	1.02833	Auxin transporter-like protein 1 n_5 Tax_Papilionoideae RepID_LAX1_MEDTR	AT5G01240.2	like AUXIN RESISTANT 1	Medtr5g082220.1	auxin influx transporter
Ca29944	Ca2	16918077	16923251	1.06792	2.80225	6.67796	7.60057e-07	3.05923e-05	5.91495	PREDICTED: phosphoinositide phospholipase C 6-like isoform X1 n_3 Tax_Cicer arietinum RepID_UPI00032A8308	AT2G40116.1	Phosphoinositide-specific phospholipase C family protein	Medtr5g082590.1	phosphoinositide-specific phospholipase C family protein
Ca29945	Ca2	16971766	16976988	-0.328934	5.26847	-5.11757	3.34084e-05	0.000403619	2.05974	Uncharacterized protein n_5 Tax_Papilionoideae RepID_A0A0L9UVZ0_PHAAN	AT3G55960.1	Haloacid dehalogenase-like hydrolase (HAD) superfamily protein	Medtr5g082660.1	NLI interacting factor-like phosphatase
Ca30014	Ca2	18007133	18011331	-2.08497	3.02705	-7.62542	8.76346e-08	7.79285e-06	8.07207	PREDICTED: GDSL esterase/lipase At4g26790-like n_1 Tax_Cicer arietinum RepID_UPI00032A698D	AT2G42990.1	GDSL-like Lipase/Acylhydrolase superfamily protein,lipid catabolic process	Medtr5g084750.1	GDSL-like lipase/acylhydrolase
Ca30090	Ca2	18852360	18858987	0.428514	5.17679	4.72776	8.85712e-05	0.000817066	1.09607	T-complex protein 1 subunit eta n_72 Tax_Mesangiospermae RepID_TCPH_ARATH	AT3G11830.1	TCP-1/cpn60 chaperonin family protein	Medtr5g087560.1	TCP-1/cpn60 chaperonin family protein
Ca30121	Ca2	19094668	19096522	0.357023	7.25731	6.55505	1.01431e-06	3.69379e-05	5.53939	Uncharacterized protein n_2 Tax_Eukaryota RepID_A0A067LFG9_JATCU	AT3G43810.1	calmodulin 7	Medtr5g088320.1	EF hand calcium-binding family protein
Ca30123	Ca2	19105262	19109549	0.376118	6.55035	5.39657	1.67103e-05	0.000247419	2.75209	PREDICTED: protein TRIGALACTOSYLDIACYLGLYCEROL 2 - chloroplastic-like n_1 Tax_Cicer arietinum RepID_UPI00032AC390	AT3G20320.2	trigalactosyldiacylglycerol2	Medtr5g088340.3	ABC-type transport system protein
Ca30124	Ca2	19257905	19260076	0.405363	4.29104	5.4802	1.35917e-05	0.000210623	2.96968	PREDICTED: blue copper protein-like n_1 Tax_Cicer arietinum RepID_UPI00032A82EF	AT1G08500.1	early nodulin-like protein 18	Medtr5g088990.1	plastocyanin-like domain protein
Ca30137	Ca2	19322067	19325262	-0.655304	3.92513	-5.76031	6.83384e-06	0.000134374	3.69967	PREDICTED: F-box protein At2g26850-like n_1 Tax_Cicer arietinum RepID_UPI00032A5F7F	AT2G32560.1	F-box family protein	Medtr5g089110.2	F-box plant-like protein
Ca30138	Ca2	19358608	19360273	0.689821	2.47016	5.49712	1.30365e-05	0.000204296	3.14993	Small nuclear ribonucleoprotein family protein n_1 Tax_Theobroma cacao RepID_A0A061G7A6_THECC	#N/A	#N/A	#N/A
Ca30166	Ca2	19747349	19751411	0.308577	4.03597	5.63901	9.19617e-06	0.000161117	3.37541	PREDICTED: GTP-binding protein At3g49725 - chloroplastic n_1 Tax_Cicer arietinum RepID_UPI00032AC076	AT3G49725.1	GTP-binding protein, HflX	Medtr5g089970.1	GTP-binding protein HflX
Ca30203	Ca2	20135157	20137783	-0.645935	7.37466	-5.21541	2.61871e-05	0.000339231	2.30317	PREDICTED: phytoene synthase 2 - chloroplastic-like n_1 Tax_Cicer arietinum RepID_UPI00032AB4E8	AT5G17230.2	PHYTOENE SYNTHASE	Medtr5g090780.1	squalene/phytoene synthase
Ca30205	Ca2	20196179	20198287	0.366805	7.06026	5.1108	3.39761e-05	0.000407927	2.04635	PREDICTED: 4-hydroxyphenylpyruvate dioxygenase n_1 Tax_Cicer arietinum RepID_UPI00032A9592	AT1G06570.2	phytoene desaturation 1	Medtr5g091060.1	4-hydroxyphenylpyruvate dioxygenase
Ca30240	Ca2	20458082	20466301	-0.459332	5.13755	-5.09124	3.5674e-05	0.00042394	1.99799	PREDICTED: probable LRR receptor-like serine/threonine-protein kinase At1g07650 isoform X1 n_2 Tax_Cicer arietinum RepID_UPI00032A8850	AT1G07650.1	Leucine-rich repeat transmembrane protein kinase	Medtr5g091950.3	LRR receptor-like kinase
Ca30248	Ca2	20493203	20495597	0.935636	5.0366	4.79532	7.4769e-05	0.000732602	1.26537	PREDICTED: uncharacterized protein LOC101488254 n_1 Tax_Cicer arietinum RepID_UPI00032ABC62	#N/A	#N/A	Medtr5g091960.1	peroxisomal small heat shock protein
Ca30251	Ca2	20557333	20558178	0.431048	4.15881	4.80571	7.28474e-05	0.000717159	1.30016	Small nuclear ribonucleoprotein-associated protein n_9 Tax_Papilionoideae RepID_I1JJ67_SOYBN	AT4G20440.4	small nuclear ribonucleoprotein associated protein B	Medtr5g092010.1	snRNP Sm family protein
Ca30288	Ca2	20812582	20814600	0.59086	1.33476	4.74688	8.44234e-05	0.00079219	1.48776	PREDICTED: mitochondrial acidic protein MAM33 n_1 Tax_Cicer arietinum RepID_UPI00032AA5DD	AT4G32605.1	Mitochondrial glycoprotein family protein	Medtr5g093000.1	glycoprotein family protein
Ca30312	Ca2	21005715	21009717	0.803802	4.78337	6.68482	7.47955e-07	3.05066e-05	5.8444	PREDICTED: aspartate carbamoyltransferase 1 - chloroplastic isoform X1 n_1 Tax_Cicer arietinum RepID_UPI00032A90C8	AT3G20330.1	PYRIMIDINE B	Medtr5g093570.1	aspartate carbamoyltransferase%2C catalytic chain
Ca30314	Ca2	21080394	21083343	-0.524221	4.60248	-5.69627	7.99223e-06	0.000147992	3.49129	PREDICTED: syntaxin-52-like isoform X1 n_2 Tax_Cicer arietinum RepID_UPI00032A902C	AT1G16240.2	syntaxin of plants 51	Medtr3g055200.1	syntaxin of plants protein
Ca30353	Ca2	21334996	21340532	5.60345	1.11147	5.47411	1.37975e-05	0.000213381	3.08809	PREDICTED: cytochrome P450 71D10-like n_1 Tax_Cicer arietinum RepID_UPI000640C2B2	AT2G45560.1	cytochrome P450, family 76, subfamily C, polypeptide 1,oxidation-reduction process	Medtr4g048580.1	cytochrome P450 family 71 protein
Ca30357	Ca2	21357978	21361636	-0.706511	3.90659	-5.17369	2.90503e-05	0.000368428	2.32117	PREDICTED: zinc finger CCCH domain-containing protein 18-like isoform X1 n_2 Tax_Cicer arietinum RepID_UPI00032A9DBF	AT2G05160.1	CCCH-type zinc fingerfamily protein with RNA-binding domain	Medtr5g094700.1	RNA-binding domain CCCH-type zinc finger protein
Ca30370	Ca2	21440793	21444650	0.463461	3.16411	5.00679	4.40448e-05	0.000495785	1.86678	PREDICTED: mitochondrial import inner membrane translocase subunit TIM50 n_1 Tax_Cicer arietinum RepID_UPI00032AC8E0	AT1G55900.1	Haloacid dehalogenase-like hydrolase (HAD) superfamily protein	Medtr5g095530.1	import inner membrane translocase subunit TIM50
Ca30365	Ca2	21463624	21465318	-0.766739	2.662	-5.72823	7.39101e-06	0.000140954	3.75594	PREDICTED: two-pore potassium channel 1 n_1 Tax_Cicer arietinum RepID_UPI00032AABBD	AT5G55630.2	Outward rectifying potassium channel protein, regulation of stomatal movement, cellular response to electrical stimulus	Medtr5g095650.2	outward rectifying potassium channel protein
Ca30391	Ca2	21594483	21598432	-0.565269	5.1246	-5.30813	2.08021e-05	0.000287414	2.53026	PREDICTED: oligopeptide transporter 1-like n_1 Tax_Cicer arietinum RepID_UPI00032AAF3E	AT4G10770.1	oligopeptide transporter 7	Medtr5g096200.1	oligopeptide transporter OPT family protein
Ca30397	Ca2	21655581	21658942	0.469208	8.09326	6.05103	3.37405e-06	8.35049e-05	4.3289	Heat shock protein 90-2 n_220 Tax_Eukaryota RepID_HS902_ARATH	AT5G56030.2	heat shock protein 81-2	Medtr5g096460.1	heat shock protein 81-2
Ca30400	Ca2	21686026	21689176	-0.751922	3.87306	-5.60025	1.01142e-05	0.000172461	3.28735	PREDICTED: probable LRR receptor-like serine/threonine-protein kinase At4g26540 n_1 Tax_Cicer arietinum RepID_UPI00032A94D2	AT4G26540.1	Leucine-rich repeat receptor-like protein kinase family protein	Medtr5g096530.1	LRR receptor-like kinase family protein
Ca30420	Ca2	21942141	21949559	0.412138	3.51415	4.80547	7.28908e-05	0.000717159	1.33601	PREDICTED: nuclear pore complex protein NUP133 isoform X1 n_2 Tax_Cicer arietinum RepID_UPI000640F676	AT2G05120.1	Nucleoporin, Nup133/Nup155-like	Medtr5g097260.1	Nup133/Nup155-like nucleoporin
Ca30428	Ca2	21952004	21964399	-0.45813	4.50524	-6.11876	2.8661e-06	7.50634e-05	4.51655	PREDICTED: calcium-transporting ATPase 12 - plasma membrane-type-like n_1 Tax_Cicer arietinum RepID_UPI00064117E6	AT5G20250.3	Raffinose synthase family protein	Medtr5g097270.1	cation-transporting ATPase plant
Ca30448	Ca2	22119114	22120277	2.42353	2.12661	5.368	1.79343e-05	0.000259966	2.99398	Putative uncharacterized protein n_2 Tax_Cicer arietinum RepID_O65745_CICAR	#N/A	#N/A	#N/A
Ca30450	Ca2	22160894	22164696	0.525841	2.89271	6.95744	3.97098e-07	2.09435e-05	6.59059	PREDICTED: RPM1-interacting protein 4-like n_1 Tax_Cicer arietinum RepID_UPI00032A5C95	AT5G55850.2	RPM1-interacting protein 4 (RIN4) family protein	Medtr5g098300.1	transmembrane protein%2C putative
Ca30477	Ca2	22283444	22284844	-0.698413	4.58638	-5.09599	3.52538e-05	0.000420271	2.02856	Glycosyltransferase n_1 Tax_Cicer arietinum RepID_A0A067XTA2_CICAR	AT3G21760.1	UDP-Glycosyltransferase superfamily protein	Medtr5g098930.1	UDP-glucose flavonoid 3-O-glucosyltransferase
Ca30479	Ca2	22431167	22434791	-0.430376	5.38018	-6.20528	2.3285e-06	6.43367e-05	4.7091	PREDICTED: chloride channel protein CLC-e n_1 Tax_Cicer arietinum RepID_UPI00032A5AF3	AT4G35440.1	chloride channel E	Medtr5g099290.3	ClC chloride channel family protein
Ca30488	Ca2	22488100	22494133	0.320048	7.42514	4.82403	6.95781e-05	0.000693405	1.33286	Pyruvate dehydrogenase E1 component subunit beta - mitochondrial n_3 Tax_Papilionoideae RepID_A0A0B2QV25_GLYSO	AT5G50850.1	Transketolase family protein	Medtr7g005380.2	pyruvate dehydrogenase E1 beta subunit
Ca30582	Ca2	24943952	24952585	-0.582214	6.20463	-5.73412	7.2854e-06	0.000139812	3.57779	PREDICTED: pheophytinase - chloroplastic n_1 Tax_Cicer arietinum RepID_UPI00032A8A74	AT5G19850.1	alpha/beta-Hydrolases superfamily protein	Medtr5g056200.1	alpha/beta fold hydrolase
Ca30659	Ca2	26392385	26398033	-0.684674	3.73552	-6.78542	5.91466e-07	2.64517e-05	6.13372	PREDICTED: random slug protein 5-like n_1 Tax_Cicer arietinum RepID_UPI00032A5641	AT1G22180.3	Sec14p-like phosphatidylinositol transfer family protein	Medtr5g062310.3	Sec14p-like phosphatidylinositol transfer family protein
Ca30666	Ca2	26636758	26643099	-1.12443	9.14991	-7.57547	9.79202e-08	8.38393e-06	7.85548	Nitrate reductase n_2 Tax_Papilionoideae RepID_E7ELN7_MEDTR	AT1G77760.1	nitrate reductase 1	Medtr5g059820.1	nitrate reductase [NADH]-like protein
Ca30737	Ca2	28140798	28151332	0.859647	2.21262	4.70614	9.35075e-05	0.000849056	1.20641	PREDICTED: uncharacterized protein At3g06530-like n_1 Tax_Cicer arietinum RepID_UPI00032ABA0A	AT3G06530.2	ARM repeat superfamily protein	Medtr5g092370.1	U3 small nucleolar RNA-associated protein
Ca30774	Ca2	28422946	28428692	-0.229498	5.74655	-5.01326	4.33383e-05	0.000490524	1.80464	PREDICTED: uncharacterized protein LOC101502703 n_1 Tax_Cicer arietinum RepID_UPI00032A9F97	AT5G14460.1	Pseudouridine synthase family protein	Medtr6g004400.2	tRNA pseudouridine synthase B
Ca30762	Ca2	28446219	28450258	1.24814	0.504602	4.66573	0.000103487	0.000905422	1.3635	PREDICTED: uncharacterized protein LOC101503999 n_1 Tax_Cicer arietinum RepID_UPI00032A7DCF	AT3G27550.1	RNA-binding CRS1 / YhbY (CRM) domain protein	Medtr6g004480.1	CRS1/YhbY (CRM) domain protein
Ca30780	Ca2	28540490	28547016	-0.279828	4.01217	-5.38677	1.71204e-05	0.000251543	2.76213	PREDICTED: zinc finger CCCH domain-containing protein 41 n_1 Tax_Cicer arietinum RepID_UPI00032AAAE7	AT3G27700.2	zinc finger (CCCH-type) family protein / RNA recognition motif (RRM)-containing protein	Medtr6g004970.1	zinc finger CCCH domain protein
Ca30794	Ca2	28580161	28607737	0.422814	5.67985	4.69841	9.53406e-05	0.00085829	1.02571	Uncharacterized protein n_1 Tax_Glycine max RepID_K7KNP5_SOYBN	AT5G40480.1	embryo defective 3012	Medtr6g004840.1	embryo defective 3012 protein
Ca30809	Ca2	28682076	28690591	1.61753	1.23099	6.66446	7.84472e-07	3.0924e-05	5.96714	Uncharacterized protein n_1 Tax_Phaseolus vulgaris RepID_V7C0V9_PHAVU	AT5G14580.1	polyribonucleotide nucleotidyltransferase, putative	Medtr6g005460.1	polyribonucleotide nucleotidyltransferase
Ca30802	Ca2	28714199	28718452	-0.897366	6.20363	-5.33257	1.95792e-05	0.000276004	2.59156	PREDICTED: phosphoenolpyruvate/phosphate translocator 2 - chloroplastic-like n_1 Tax_Cicer arietinum RepID_UPI00032AAD45	AT3G01550.1	phosphoenolpyruvate (pep)/phosphate translocator 2	Medtr6g005480.1	plastid phosphate translocator
Ca30807	Ca2	28732215	28739367	-0.41996	3.29304	-5.22871	2.53358e-05	0.000332057	2.4453	PREDICTED: DNA (cytosine-5)-methyltransferase DRM2 n_1 Tax_Cicer arietinum RepID_UPI00032A832C	AT5G14620.1	domains rearranged methyltransferase 2	Medtr6g005580.1	DNA (cytosine-5)-methyltransferase DRM1/2
Ca30816	Ca2	28822120	28826611	0.833218	3.30636	8.35726	1.79142e-08	2.73997e-06	9.59535	PREDICTED: tetraketide alpha-pyrone reductase 2 n_1 Tax_Cicer arietinum RepID_UPI00032A5C4D	AT5G14700.1	NAD(P)-binding Rossmann-fold superfamily protein	Medtr6g406250.1	cinnamoyl-CoA reductase
Ca30827	Ca2	28913006	28917733	-0.414264	7.99728	-6.9824	3.74908e-07	2.01201e-05	6.52592	Trypsin-like serine protease n_2 Tax_Papilionoideae RepID_G7KIR6_MEDTR	AT3G27925.1	DegP protease 1	Medtr6g007030.1	trypsin-like serine protease
Ca30832	Ca2	28973014	28976358	1.12718	5.70214	6.67363	7.67797e-07	3.0742e-05	5.81789	Formate dehydrogenase n_5 Tax_Papilionoideae RepID_B6VPZ9_LOTJA	AT5G14780.1	formate dehydrogenase	Medtr6g007170.1	D-glycerate dehydrogenase/hydroxypyruvate reductase
Ca30835	Ca2	28987373	28992340	0.366715	2.2147	4.75995	8.17015e-05	0.000774721	1.4082	PREDICTED: deoxynucleoside triphosphate triphosphohydrolase SAMHD1 homolog isoform X1 n_1 Tax_Cicer arietinum RepID_UPI00032A58FC	AT5G40270.1	HD domain-containing metal-dependent phosphohydrolase family protein	Medtr6g007210.1	metal-dependent phosphohydrolase
Ca30831	Ca2	29048335	29056962	0.406388	4.21978	6.33471	1.70926e-06	5.1437e-05	5.0331	Metal-dependent phosphohydrolase n_3 Tax_Papilionoideae RepID_A0A072U697_MEDTR	AT1G18880.1	Major facilitator superfamily protein	Medtr4g107510.1	peptide/nitrate transporter
Ca30830	Ca2	29062222	29066728	-0.363336	2.99574	-4.65284	0.000106891	0.000926285	1.04491	Serine/Threonine-kinase HT1-like protein n_1 Tax_Medicago truncatula RepID_A0A072U6Y5_MEDTR	AT3G01490.1	Protein kinase superfamily protein	Medtr6g007603.1	Serine/Threonine-kinase HT1-like protein
Ca30847	Ca2	29113811	29117241	-1.25078	5.29324	-10.5894	2.1718e-10	1.58267e-07	13.9383	Homeobox associated leucine zipper protein n_3 Tax_Papilionoideae RepID_A0A072U6Z4_MEDTR	AT3G01470.1	homeobox 1	Medtr6g007647.2	homeobox associated leucine zipper protein
Ca30861	Ca2	29338816	29340140	0.985992	3.45753	5.41973	1.57803e-05	0.000236396	2.85953	PREDICTED: peroxidase 63 n_1 Tax_Cicer arietinum RepID_UPI00032A6940	AT5G40150.1	Peroxidase superfamily protein	Medtr6g008075.1	peroxidase family protein
Ca30872	Ca2	29378021	29385353	-0.510028	6.0834	-5.89611	4.90933e-06	0.000108824	3.96931	PREDICTED: chloroplastic group IIA intron splicing facilitator CRS1 - chloroplastic isoform X1 n_2 Tax_Cicer arietinum RepID_UPI00032A4E88	AT3G01370.1	CRM family member 2	Medtr6g008410.1	group IIA intron splicing facilitator CRS1
Ca30877	Ca2	29393809	29407574	-0.783537	7.4518	-5.99794	3.83566e-06	9.10504e-05	4.21624	PREDICTED: cytochrome P450 82A3-like n_1 Tax_Prunus mume RepID_UPI00046DD720	AT4G31970.1	cytochrome P450, family 82, subfamily C, polypeptide 2	Medtr6g008500.1	cytochrome P450 family 82 protein
Ca30881	Ca2	29411194	29423169	-0.766479	3.82447	-6.52026	1.10102e-06	3.9072e-05	5.501	Peptide/nitrate transporter plant-like protein n_2 Tax_Papilionoideae RepID_G7KJG0_MEDTR	AT5G14940.1	Major facilitator superfamily protein	Medtr6g008690.1	peptide/nitrate transporter plant-like protein
Ca30892	Ca2	29525183	29534481	-0.313244	7.23059	-5.15612	3.03491e-05	0.000378773	2.15759	Glucose-6-phosphate isomerase n_8 Tax_Papilionoideae RepID_G7KJZ8_MEDTR	AT5G42740.1	Sugar isomerase (SIS) family protein	Medtr6g009330.1	glucose-6-phosphate isomerase
Ca30890	Ca2	29555162	29559783	0.403952	4.01866	5.39753	1.6671e-05	0.000247226	2.77881	PREDICTED: uncharacterized protein LOC101503254 n_1 Tax_Cicer arietinum RepID_UPI00032A8D58	#N/A	#N/A	Medtr6g009400.1	rRNA methyltransferase YlbH-like protein%2C putative
Ca30885	Ca2	29574300	29578763	-0.259096	4.92388	-6.00777	3.74557e-06	8.97673e-05	4.23571	PREDICTED: uncharacterized protein LOC101503571 n_1 Tax_Cicer arietinum RepID_UPI00032A9FA9	AT1G10410.1	Protein of unknown function (DUF1336)	Medtr6g009410.2	plant/F14N23-31 protein
Ca30934	Ca2	30181275	30183137	-1.27399	3.2025	-7.1847	2.35937e-07	1.49118e-05	7.09725	Expansin A10 n_2 Tax_Papilionoideae RepID_G7KKW0_MEDTR	AT1G69530.3	expansin A1	Medtr7g011060.1	expansin A10
Ca30946	Ca2	30316372	30319555	-0.662633	2.69518	-5.07732	3.69346e-05	0.000434983	2.16549	Pectinesterase n_2 Tax_Papilionoideae RepID_G7KKY7_MEDTR	AT3G29090.1	pectin methylesterase 31	Medtr6g012800.1	pectinesterase
Ca30955	Ca2	30473780	30477563	-0.755509	6.948	-6.0315	3.53689e-06	8.62786e-05	4.29708	DUF4336 domain protein n_3 Tax_Papilionoideae RepID_G7KLT0_MEDTR	AT3G01060.3	#N/A	Medtr6g013750.1	DUF4336 domain protein
Ca30972	Ca2	30505872	30512831	0.355751	7.76645	4.83063	6.84379e-05	0.0006873	1.34043	Chaperone protein ClpB3 n_2 Tax_Papilionoideae RepID_G7KLS1_MEDTR	AT5G15450.1	casein lytic proteinase B3	Medtr6g013660.1	chaperone protein ClpB3
Ca30978	Ca2	30628840	30633979	1.06379	2.31366	6.17105	2.52768e-06	6.82669e-05	4.74521	PREDICTED: ribosome biogenesis protein WDR12 homolog n_1 Tax_Cicer arietinum RepID_UPI00032A9D0F	AT5G15550.1	Transducin/WD40 repeat-like superfamily protein	Medtr7g099170.1	transducin/WD40 repeat protein
Ca30986	Ca2	30677606	30678973	1.6512	4.10533	7.57456	9.81186e-08	8.38393e-06	7.89185	PREDICTED: phenolic glucoside malonyltransferase 1-like n_1 Tax_Cicer arietinum RepID_UPI00032A6152	AT5G39050.1	HXXXD-type acyl-transferase family protein	Medtr6g015315.1	malonyl-CoA:isoflavone 7-O-glucoside malonyltransferase
Ca31007	Ca2	30906410	30913869	0.372196	5.71484	7.09636	2.88628e-07	1.69791e-05	6.79288	Sugar porter (SP) family MFS transporter n_2 Tax_Papilionoideae RepID_A0A072U7Q1_MEDTR	AT5G16150.3	plastidic GLC translocator	Medtr6g018790.1	sugar porter (SP) family MFS transporter
Ca31016	Ca2	31029682	31055315	0.855778	11.0588	5.85578	5.41505e-06	0.000115032	3.74412	Elongation factor 1-alpha n_30 Tax_Streptophyta RepID_A0A0D3FEJ1_9ORYZ	AT5G60390.3	GTP binding Elongation factor Tu family protein	Medtr1g095650.2	GTP-binding elongation factor Tu family protein
Ca31037	Ca2	31231902	31235640	0.356589	4.44359	4.77339	7.89943e-05	0.000757978	1.21035	PREDICTED: plant UBX domain-containing protein 1 isoform X1 n_2 Tax_Cicer arietinum RepID_UPI00032ACE6F	#N/A	#N/A	Medtr0531s0010.1	tether containing UBX domain for GLUT4-like protein
Ca31066	Ca2	31662694	31665683	0.616997	3.92328	4.83014	6.85215e-05	0.000687688	1.38038	PREDICTED: mitochondrial import receptor subunit TOM20-like n_1 Tax_Cicer arietinum RepID_UPI00032A6441	AT1G27390.1	translocase outer membrane 20-2	Medtr6g024140.1	plant-specific import receptor subunit TOM20
Ca31071	Ca2	31674466	31677085	-0.288443	3.2994	-4.76605	8.04617e-05	0.000766767	1.29074	DNA-directed RNA polymerase II subunit RPB7 n_6 Tax_Phaseoleae RepID_RPB7_SOYBN	AT5G59180.1	DNA-directed RNA polymerase II	Medtr4g096810.1	DNA-directed RNA polymerase II subunit Rpb7
Ca31114	Ca2	32164076	32168649	0.620274	2.83027	5.21485	2.62238e-05	0.000339231	2.43429	PREDICTED: protein trichome birefringence-like 19 n_1 Tax_Cicer arietinum RepID_UPI00032A8641	AT5G15900.1	TRICHOME BIREFRINGENCE-LIKE 19	Medtr6g016880.1	Pmr5/Cas1p GDSL/SGNH-like acyl-esterase family protein
Ca31144	Ca2	32259138	32321077	0.286746	5.29549	4.7407	8.57441e-05	0.000799964	1.12768	PREDICTED: isoprenylcysteine alpha-carbonyl methylesterase ICME n_1 Tax_Cicer arietinum RepID_UPI00032AB483	AT5G15870.1	glycosyl hydrolase family 81 protein	Medtr6g016785.1	glycoside hydrolase family 81 protein
Ca31145	Ca2	32736918	32740812	2.01424	0.75434	5.37882	1.74606e-05	0.000254828	3.02485	PREDICTED: proline dehydrogenase 2 - mitochondrial-like n_1 Tax_Cicer arietinum RepID_UPI00032A93A5	AT5G38710.1	Methylenetetrahydrofolate reductase family protein,oxidation-reduction process, response to osmotic stress, response to water deprivation	Medtr6g016640.1	proline dehydrogenase
Ca31180	Ca2	32890050	32893938	0.644978	3.76843	4.76824	8.0021e-05	0.000763995	1.27483	NSP-interacting kinase-like protein n_2 Tax_Papilionoideae RepID_A0A072U7V9_MEDTR	AT5G16000.1	NSP-interacting kinase 1	Medtr6g016495.1	NSP-interacting kinase-like protein
Ca31182	Ca2	32912680	32915430	-0.413986	5.16358	-5.0186	4.27642e-05	0.000485581	1.818	Hexosyltransferase n_2 Tax_Papilionoideae RepID_G7ZV05_MEDTR	AT3G02350.1	galacturonosyltransferase 9	Medtr6g016380.1	glycosyltransferase Quasimodo protein%2C putative
Ca31183	Ca2	32950593	32954644	-0.568469	7.45562	-6.08694	3.09424e-06	7.88679e-05	4.4289	PREDICTED: ATP sulfurylase 2 n_1 Tax_Cicer arietinum RepID_UPI00032AD054	AT1G19920.1	Pseudouridine synthase/archaeosine transglycosylase-like family protein	Medtr6g016335.1	ATP sulfurylase
Ca31198	Ca2	33138434	33139531	1.42549	4.86989	9.81301	9.38893e-10	3.27493e-07	12.4957	PREDICTED: proline-rich protein 4 n_1 Tax_Cicer arietinum RepID_UPI00032A82A0	AT5G15780.1	Pollen Ole e 1 allergen and extensin family protein	Medtr6g015995.1	pollen Ole e I family allergens
Ca31203	Ca2	33220629	33236384	-1.43518	0.389427	-4.52199	0.000148472	0.00117419	1.02159	PREDICTED: cytochrome P450 85A-like n_1 Tax_Cicer arietinum RepID_UPI00032A64DC	AT3G30180.1	brassinosteroid-6-oxidase 2	Medtr6g015910.1	cytochrome P450 family protein
Ca31207	Ca2	33245002	33251604	0.422953	4.20051	5.46379	1.41533e-05	0.000218001	2.93751	PREDICTED: probable tRNA (guanine(26)-N(2))-dimethyltransferase 1 isoform X1 n_3 Tax_Cicer arietinum RepID_UPI00032AC68D	AT3G02320.1	N2,N2-dimethylguanosine tRNA methyltransferase	Medtr6g015885.1	N(2)%2CN(2)-dimethylguanosine tRNA methyltransferase%2C putative
Ca31208	Ca2	33283869	33286284	0.480333	3.72227	5.30761	2.0829e-05	0.000287527	2.57238	PREDICTED: nonsense-mediated mRNA decay protein 2 n_1 Tax_Cicer arietinum RepID_UPI00032AA9F7	AT3G02220.1	KOG3241 - Uncharacterized conserved protein (1 of 1)	Medtr6g015855.1	DUF2039 family protein
Ca31230	Ca2	33521082	33524022	-1.40113	5.5366	-5.27266	2.27157e-05	0.000306652	2.44799	PREDICTED: uncharacterized protein LOC101503941 isoform X1 n_2 Tax_Cicer arietinum RepID_UPI00032AB325	#N/A	#N/A	Medtr6g018690.1	hypothetical protein
Ca31243	Ca2	33745378	33749473	-0.857763	7.33536	-10.5211	2.4633e-10	1.58267e-07	13.8141	PREDICTED: uncharacterized protein LOC101511229 n_1 Tax_Cicer arietinum RepID_UPI00032AC532	AT5G38510.2	Rhomboid-related intramembrane serine protease family protein	Medtr0024s0260.2	S54 family peptidase
Ca31282	Ca2	34242377	34248534	0.259887	5.33507	5.04098	4.04397e-05	0.000463662	1.87111	Uncharacterized protein n_13 Tax_Papilionoideae RepID_I1MNU1_SOYBN	AT3G03960.1	TCP-1/cpn60 chaperonin family protein	Medtr6g032870.1	TCP-1/cpn60 chaperonin family protein
Ca31311	Ca2	34483174	34491066	-0.314862	4.38212	-4.75011	8.37432e-05	0.000787732	1.17986	PREDICTED: probable magnesium transporter NIPA8 n_1 Tax_Cicer arietinum RepID_UPI00032A627C	AT3G26670.3	Protein of unknown function (DUF803)	Medtr6g033100.1	magnesium transporter NIPA protein
Ca31338	Ca2	35004447	35008387	0.685332	5.28386	8.21837	2.40803e-08	3.28846e-06	9.26986	Spermidine synthase n_3 Tax_Medicago RepID_G7K1F1_MEDTR	AT1G23820.1	spermidine synthase 1	Medtr5g034470.2	spermidine synthase
Ca31342	Ca2	35014144	35023401	0.766749	0.955134	4.67705	0.000100591	0.000887787	1.33042	PREDICTED: LOW QUALITY PROTEIN: WD repeat-containing protein DDB_G0290555-like n_1 Tax_Cicer arietinum RepID_UPI000640CC91	AT1G29320.1	Transducin/WD40 repeat-like superfamily protein	Medtr7g106650.1	transducin/WD-like repeat-protein
Ca31360	Ca2	35321463	35350636	-0.474808	5.60608	-5.50027	1.29353e-05	0.000203336	3.00249	PREDICTED: uncharacterized aarF domain-containing protein kinase At1g71810 - chloroplastic isoform X1 n_2 Tax_Cicer arietinum RepID_UPI00032A7933	AT4G23160.1	cysteine-rich RLK (RECEPTOR-like protein kinase) 8	Medtr4g079363.1	hypothetical protein
Ca31376	Ca2	35501605	35504842	-0.382315	5.12976	-5.22013	2.58818e-05	0.000336617	2.31343	PREDICTED: uncharacterized protein LOC101490347 n_1 Tax_Cicer arietinum RepID_UPI000640E30C	AT1G24040.2	Acyl-CoA N-acyltransferases (NAT) superfamily protein	Medtr5g035060.1	GNAT family acetyltransferase
Ca31375	Ca2	35516241	35517869	0.523005	2.50671	5.06946	3.76659e-05	0.000440107	2.14865	Uncharacterized protein n_8 Tax_Phaseoleae RepID_I1J5C7_SOYBN	AT1G70230.1	TRICHOME BIREFRINGENCE-LIKE 27	Medtr5g035070.1	Pmr5/Cas1p GDSL/SGNH-like acyl-esterase family protein
Ca31378	Ca2	35653764	35655162	-0.578708	4.35089	-5.61727	9.70017e-06	0.000167454	3.30802	PREDICTED: uncharacterized protein LOC101515721 n_1 Tax_Cicer arietinum RepID_UPI00032A6B75	AT1G60010.1	PF14009 - Domain of unknown function (DUF4228) (DUF4228) (1 of 28)	Medtr5g035430.1	DUF4228 domain protein
Ca31422	Ca2	36111116	36137142	-0.582065	4.51469	-8.07392	3.28438e-08	4.10144e-06	8.9687	PREDICTED: type I inositol 1 -4 -5-trisphosphate 5-phosphatase 1-like isoform X1 n_4 Tax_Cicer arietinum RepID_UPI00032AA28D	AT1G71710.2	DNAse I-like superfamily protein	Medtr6g042240.3	type I inositol-1%2C4%2C5-trisphosphate 5-phosphatase
Ca31420	Ca2	36157061	36162081	0.651158	5.36167	6.03672	3.49261e-06	8.54711e-05	4.30677	PREDICTED: ran-binding protein 1 homolog b-like n_1 Tax_Cicer arietinum RepID_UPI00032A9948	AT1G07140.1	Pleckstrin homology (PH) domain superfamily protein	Medtr6g042530.1	Ran-binding protein 2%2C Ran-binding domain protein
Ca31429	Ca2	36252015	36258687	0.389752	4.50531	5.04416	4.012e-05	0.000461727	1.89055	PREDICTED: nucleolar complex protein 2 homolog n_1 Tax_Cicer arietinum RepID_UPI00032ABF65	AT3G55510.1	Noc2p family	Medtr6g033410.1	Noc2p family protein
Ca31433	Ca2	36340360	36343658	-0.998722	2.62158	-4.62399	0.00011492	0.00097272	1.06256	PREDICTED: microtubule-associated protein TORTIFOLIA1 n_1 Tax_Cicer arietinum RepID_UPI00032AA282	AT1G27210.1	ARM repeat superfamily protein	Medtr5g036950.1	microtubule-associated TORTIFOLIA-like protein
Ca31434	Ca2	36383516	36386274	-0.52156	5.41938	-5.15011	3.08068e-05	0.000380606	2.14065	PREDICTED: transcription factor MYB1R1-like n_1 Tax_Cicer arietinum RepID_UPI00032AA66E	AT1G70000.2	myb-like transcription factor family protein	Medtr5g037080.1	MYB-like transcription factor family protein
Ca31447	Ca2	36457143	36460433	-0.641253	4.30757	-7.33635	1.67318e-07	1.20714e-05	7.34265	PREDICTED: transcription factor bHLH79-like n_1 Tax_Cicer arietinum RepID_UPI00032A6C94	#N/A	#N/A	Medtr5g037250.1	transcription factor
Ca31453	Ca2	36547427	36549632	-0.553708	5.19361	-5.42758	1.54774e-05	0.000233458	2.82385	Glutathione S-transferase - amino-terminal domain protein n_2 Tax_Medicago truncatula RepID_G7K8A6_MEDTR	AT1G10370.1	Glutathione S-transferase family protein	Medtr5g037380.1	glutathione S-transferase%2C amine-terminal domain protein
Ca31464	Ca2	36746089	36751473	1.18023	5.99625	7.54108	1.05712e-07	8.78733e-06	7.79554	PREDICTED: protein NRT1/ PTR FAMILY 2.13-like n_1 Tax_Cicer arietinum RepID_UPI00032AD278	AT1G69870.1	nitrate transporter 1.7	Medtr5g038060.1	peptide/nitrate transporter
Ca31469	Ca2	36844531	36849212	-0.674528	3.64423	-6.77479	6.06285e-07	2.68787e-05	6.12684	PREDICTED: uncharacterized protein LOC101492605 isoform X1 n_3 Tax_Cicer arietinum RepID_UPI0006410CB0	AT1G27070.1	5'-AMP-activated protein kinase-related	Medtr5g038210.1	carbohydrate-binding module family 48 protein
Ca24222	Ca3	16597	17856	0.8347	1.7142	6.44579	1.31295e-06	4.39421e-05	5.47239	PREDICTED: myb-like protein AA n_1 Tax_Cicer arietinum RepID_UPI00032A6B95	#N/A	#N/A	Medtr7g005500.1	Humj1%2C putative
Ca24233	Ca3	246804	252992	-0.433308	4.33817	-6.28939	1.90427e-06	5.53722e-05	4.9269	Transcription initiation factor TFIID subunit 10 n_15 Tax_Papilionoideae RepID_G7KSG1_MEDTR	#N/A	#N/A	#N/A
Ca24263	Ca3	511489	515199	-0.572962	2.86755	-4.83502	6.76895e-05	0.000681574	1.51366	PREDICTED: uncharacterized protein LOC101492945 n_1 Tax_Cicer arietinum RepID_UPI00032ABDCF	AT3G07210.1	#N/A	Medtr7g056243.1	hypothetical protein
Ca24288	Ca3	866848	867886	-0.677802	5.29914	-5.69994	7.92059e-06	0.0001472	3.49003	PREDICTED: uncharacterized protein LOC101513848 n_1 Tax_Cicer arietinum RepID_UPI00032A8905	AT3G01660.1	S-adenosyl-L-methionine-dependent methyltransferases superfamily protein	Medtr7g032900.1	methyltransferase type 11
Ca24407	Ca3	2923116	2926591	-1.00614	6.264	-5.73052	7.34973e-06	0.00014063	3.56692	PREDICTED: probable leucine-rich repeat receptor-like serine/threonine-protein kinase At3g14840 n_1 Tax_Cicer arietinum RepID_UPI00032AA7D9	AT2G45340.1	Leucine-rich repeat protein kinase family protein	Medtr7g038690.1	LRR receptor-like kinase
Ca24470	Ca3	3802435	3807060	0.618724	5.37861	9.99701	6.59298e-10	2.90083e-07	12.8426	PREDICTED: ethylene-responsive transcription factor-like protein At4g13040 isoform X1 n_5 Tax_Cicer arietinum RepID_UPI00032A70BD	AT4G13040.1	Integrase-type DNA-binding superfamily protein	Medtr7g055857.1	ethylene response factor
Ca24486	Ca3	4022293	4117518	0.791196	1.77964	5.70951	7.7374e-06	0.000145029	3.786	PREDICTED: BEL1-like homeodomain protein 9 n_1 Tax_Cicer arietinum RepID_UPI00032A891B	AT5G02030.1	POX (plant homeobox) family protein	Medtr7g065050.1	BEL1-like homeodomain protein
Ca24557	Ca3	5132325	5132870	-0.656627	5.66434	-7.126	2.69728e-07	1.62678e-05	6.86057	PREDICTED: vasodilator-stimulated phosphoprotein-like n_1 Tax_Cicer arietinum RepID_UPI00032A51A5	#N/A	#N/A	Medtr7g056413.1	hypothetical protein
Ca24577	Ca3	5387446	5392923	0.417029	3.49379	4.72633	8.88897e-05	0.000819017	1.19801	PREDICTED: translation initiation factor eIF-2B subunit delta-like isoform X1 n_2 Tax_Cicer arietinum RepID_UPI00032A5B17	AT5G38640.1	NagB/RpiA/CoA transferase-like superfamily protein	Medtr6g017100.2	translation initiation factor eIF-2B delta subunit
Ca24627	Ca3	6225296	6231435	-0.429444	5.29942	-5.88631	5.02763e-06	0.000110168	3.94238	PREDICTED: uncharacterized membrane protein At3g27390-like n_1 Tax_Cicer arietinum RepID_UPI00032A5974	AT3G27390.1	#N/A	Medtr7g031900.1	transmembrane protein%2C putative
Ca24741	Ca3	7687836	7690987	1.10526	0.645616	4.68328	9.90301e-05	0.000876035	1.40679	Peroxisomal Ca-dependent solute carrier protein n_2 Tax_Papilionoideae RepID_G7L5K1_MEDTR	AT3G55640.1	Mitochondrial substrate carrier family protein	Medtr7g064980.1	peroxisomal Ca-dependent solute carrier protein
Ca24768	Ca3	8056085	8056540	-1.01225	0.832865	-5.07313	3.73223e-05	0.000438437	2.31369	Putative ATP synthase CFi alpha subunit (Fragment) n_1 Tax_Prunus dulcis RepID_A7Y7P3_PRUDU	ATCG00120.1	ATP synthase subunit alpha	Medtr2g008350.1	ATP synthase subunit alpha
Ca24778	Ca3	8363212	8364309	-0.828471	6.3689	-8.23357	2.33105e-08	3.26365e-06	9.30242	PREDICTED: uncharacterized protein At3g28850-like n_1 Tax_Cicer arietinum RepID_UPI00032A9479	AT1G64500.1	Glutaredoxin family protein	Medtr8g099665.1	glutaredoxin (GRX) family protein
Ca24789	Ca3	8483095	8486233	-0.715966	1.15318	-5.38898	1.70272e-05	0.000250656	3.04416	PREDICTED: LOW QUALITY PROTEIN: G-type lectin S-receptor-like serine/threonine-protein kinase At1g11300 n_1 Tax_Cicer arietinum RepID_UPI000640EC81	AT1G11330.1	S-locus lectin protein kinase family protein	Medtr7g056667.1	G-type lectin S-receptor-like Serine/Threonine-kinase
Ca24786	Ca3	8512115	8521239	-0.493113	3.71729	-6.25434	2.07056e-06	5.91947e-05	4.87234	PREDICTED: pentatricopeptide repeat-containing protein At5g48730 - chloroplastic n_1 Tax_Cicer arietinum RepID_UPI00032A7D38	AT5G48730.1	Pentatricopeptide repeat (PPR) superfamily protein	Medtr7g056613.1	PPR containing plant-like protein
Ca24809	Ca3	8812786	8818447	-0.413132	6.09338	-6.0792	3.1525e-06	7.96984e-05	4.41043	PREDICTED: uncharacterized protein LOC101511308 isoform X2 n_1 Tax_Cicer arietinum RepID_UPI00032AB52D	#N/A	#N/A	Medtr7g057180.1	transmembrane protein%2C putative
Ca24861	Ca3	9732419	9733987	-0.828753	6.7843	-4.74688	8.44243e-05	0.00079219	1.1475	PREDICTED: uncharacterized protein LOC101510131 n_1 Tax_Cicer arietinum RepID_UPI00032ABFEA	AT5G02160.1	#N/A	Medtr7g062470.1	transmembrane protein%2C putative
Ca24938	Ca3	11366189	11376046	2.00116	0.645179	4.72389	8.94366e-05	0.000821701	1.50606	PREDICTED: triacylglycerol lipase 2 n_1 Tax_Cicer arietinum RepID_UPI00032A5D6B	AT5G14180.1	Myzus persicae-induced lipase 1,lipid catabolic process	Medtr1g054775.1	endonuclease/exonuclease/phosphatase family protein
Ca24942	Ca3	11423390	11426989	-0.522308	3.14541	-5.87504	5.16719e-06	0.000111648	4.03352	Plant U-box protein n_1 Tax_Medicago truncatula RepID_G7I5N0_MEDTR	#N/A	#N/A	Medtr4g065073.1	DUF688 family protein
Ca24996	Ca3	13553567	13556891	-0.400272	6.20733	-4.74302	8.52467e-05	0.000797461	1.13742	PREDICTED: probable plastid-lipid-associated protein 11 isoform X1 n_2 Tax_Cicer arietinum RepID_UPI00032A8B8C	AT4G00030.1	Plastid-lipid associated protein PAP / fibrillin family protein	Medtr7g444820.1	plastid lipid-associated protein
Ca25005	Ca3	13849235	13856152	-0.714299	7.71894	-6.62777	8.54931e-07	3.24471e-05	5.70602	PREDICTED: transcription factor UNE10 n_1 Tax_Cicer arietinum RepID_UPI00032A8573	AT4G00050.1	basic helix-loop-helix (bHLH) DNA-binding superfamily protein	Medtr7g039110.1	transcription factor
Ca25013	Ca3	13977138	13978656	-1.3421	2.5009	-6.86909	4.87041e-07	2.34018e-05	6.41041	Uncharacterized protein n_2 Tax_Papilionoideae RepID_B7FJB0_MEDTR	AT3G60550.1	cyclin p3;2	Medtr4g028060.1	cyclin p4
Ca25050	Ca3	15182697	15205392	-0.566879	5.2851	-6.48858	1.18653e-06	4.09484e-05	5.382	PREDICTED: phosphoglucan phosphatase LSF1 - chloroplastic isoform X1 n_2 Tax_Cicer arietinum RepID_UPI00032A5BB1	AT4G23160.1	cysteine-rich RLK (RECEPTOR-like protein kinase) 8	Medtr7g034465.1	phosphoglucan phosphatase LSF1
Ca25066	Ca3	15739367	15744014	-0.583131	4.74682	-5.12789	3.25601e-05	0.000397452	2.0907	Four ACT domain ACT domain protein which protein n_4 Tax_Papilionoideae RepID_G7L275_MEDTR	AT3G01990.1	ACT domain repeat 6	Medtr7g028050.1	four ACT domain ACT domain protein which protein
Ca25102	Ca3	16312234	16322469	-0.68927	1.43823	-5.7734	6.6188e-06	0.000131473	3.93114	PREDICTED: histone-lysine N-methyltransferase setd3 n_1 Tax_Cicer arietinum RepID_UPI0006414F47	AT4G23160.1	cysteine-rich RLK (RECEPTOR-like protein kinase) 8	Medtr3g093120.1	SPFH domain/band 7 family protein
Ca25099	Ca3	16345164	16350914	-0.516721	7.20978	-5.07169	3.74567e-05	0.000438668	1.94817	PREDICTED: uncharacterized protein LOC101504453 n_1 Tax_Cicer arietinum RepID_UPI00032A5F3D	AT3G27110.2	Peptidase family M48 family protein	Medtr7g033405.1	M48 family peptidase
Ca25100	Ca3	16361113	16376007	-0.402087	6.78886	-4.69608	9.58989e-05	0.00085927	1.02221	PREDICTED: sulfite oxidase-like isoform X1 n_2 Tax_Cicer arietinum RepID_UPI00032A5043	AT4G23160.1	cysteine-rich RLK (RECEPTOR-like protein kinase) 8	Medtr7g033410.1	sulfite oxidase-like protein
Ca25164	Ca3	17941444	17949298	-1.32543	3.47404	-5.69117	8.09256e-06	0.00014859	3.58066	Transmembrane amino acid transporter family protein n_2 Tax_Papilionoideae RepID_G7II25_MEDTR	AT5G40780.2	lysine histidine transporter 1	Medtr2g101920.1	transmembrane amino acid transporter family protein
Ca25173	Ca3	18164542	18166384	-0.839991	3.84141	-4.99459	4.54074e-05	0.000508051	1.80332	Cytochrome b/b6 (Fragment) n_1 Tax_Cynara cardunculus var. scolymus RepID_A0A118K2H4_CYNCS	ATCG00720.1	photosynthetic electron transfer B	Medtr4g034790.1	cytochrome B(amine-terminal)/b6/petB protein
Ca25175	Ca3	18175761	18180341	-0.810723	2.56686	-5.20023	2.71942e-05	0.000349819	2.45891	Ribosomal protein S7 n_28 Tax_Mesangiospermae RepID_G7J101_MEDTR	ATCG01250.1	NADH-Ubiquinone/plastoquinone (complex I) protein	Medtr3g035660.1	NAD(P)H-quinone oxidoreductase subunit 2
Ca25182	Ca3	18181312	18185023	-0.863457	0.75394	-4.84627	6.58084e-05	0.000671384	1.78986	Protein Ycf2 n_1 Tax_Cicer arietinum RepID_B5LMR5_CICAR	ATCG00860.1	Chloroplast Ycf2;ATPase, AAA type, core	Medtr0689s0010.1	Ycf2%3B ATPase%2C AAA type%2C core protein
Ca25186	Ca3	18199621	18201476	-0.647165	0.98011	-4.60597	0.00012024	0.00100858	1.2168	Ribosomal protein S7 n_28 Tax_Mesangiospermae RepID_G7J101_MEDTR	ATCG01250.1	NADH-Ubiquinone/plastoquinone (complex I) protein	Medtr0002s0310.1	NADH-quinone oxidoreductase protein
Ca25339	Ca3	21472494	21473483	0.6038	4.04591	4.76621	8.04297e-05	0.000766767	1.21696	Ribonucleoside-diphosphate reductase small chain n_6 Tax_Papilionoideae RepID_A0A072VJ25_MEDTR	AT3G27060.1	Ferritin/ribonucleotide reductase-like family protein	Medtr1g050472.1	ribonucleoside-diphosphate reductase small chain
Ca25337	Ca3	21474001	21491883	0.587343	4.15182	4.7241	8.93885e-05	0.000821701	1.10712	Ribonucleoside-diphosphate reductase small chain n_6 Tax_Papilionoideae RepID_A0A072VJ25_MEDTR	AT3G27060.1	Ferritin/ribonucleotide reductase-like family protein	Medtr1g050472.1	ribonucleoside-diphosphate reductase small chain
Ca25356	Ca3	22012526	22020948	0.403244	5.12997	5.83091	5.75296e-06	0.000119879	3.80884	Uncharacterized protein n_1 Tax_Phaseolus angularis RepID_A0A0L9UM47_PHAAN	AT5G20890.1	TCP-1/cpn60 chaperonin family protein	Medtr7g113470.1	TCP-1/cpn60 chaperonin family protein
Ca25422	Ca3	23884092	23900225	-0.973077	0.992556	-6.41791	1.40262e-06	4.57422e-05	5.35154	PREDICTED: mitochondrial pyruvate carrier 1-like isoform X1 n_2 Tax_Cicer arietinum RepID_UPI00064143AA	AT4G23160.1	cysteine-rich RLK (RECEPTOR-like protein kinase) 8	Medtr6g472230.1	disease resistance protein (TIR-NBS-LRR class)%2C putative
Ca25442	Ca3	24503256	24508883	-0.526241	2.05368	-5.33501	1.9461e-05	0.000274845	2.85103	PREDICTED: putative pentatricopeptide repeat-containing protein At1g16830 n_1 Tax_Cicer arietinum RepID_UPI000640E5C8	AT1G16830.1	Pentatricopeptide repeat (PPR) superfamily protein	Medtr7g025610.1	PPR containing plant-like protein%2C putative
Ca26900	Ca3	25851583	25858017	0.686274	5.06407	6.09625	3.02563e-06	7.80389e-05	4.45027	PREDICTED: pescadillo homolog n_4 Tax_Cicer arietinum RepID_UPI00032AA0C1	AT5G14520.1	pescadillo-related	Medtr7g100040.2	pescadillo-like protein
Ca25588	Ca3	27905439	27909055	-1.22513	5.63009	-7.11728	2.75148e-07	1.6439e-05	6.84616	PREDICTED: glycerol-3-phosphate 2-O-acyltransferase 6-like n_1 Tax_Cicer arietinum RepID_UPI000640D57A	AT2G38110.1	glycerol-3-phosphate acyltransferase 6	Medtr7g067380.1	glycerol-3-phosphate acyltransferase
Ca25599	Ca3	27998606	28006264	-1.16647	5.1518	-6.86817	4.88079e-07	2.34018e-05	6.26992	Auxin transporter-like protein 2 n_15 Tax_rosids RepID_LAX2_MEDTR	AT2G38120.1	Transmembrane amino acid transporter family protein	Medtr7g067450.1	auxin influx transporter
Ca25625	Ca3	28501588	28504781	0.572793	3.23713	5.32486	1.9957e-05	0.000279271	2.64807	PREDICTED: protein SCO1 homolog 1 - mitochondrial n_1 Tax_Cicer arietinum RepID_UPI00032A6AB0	AT3G08950.1	electron transport SCO1/SenC family protein	Medtr7g069070.1	electron transport SCO1/SenC family protein%2C putative
Ca25622	Ca3	28563758	28567832	0.34513	6.03655	6.73411	6.66591e-07	2.83208e-05	5.95988	Proliferation-associated protein 2G4 n_25 Tax_Papilionoideae RepID_A0A0B2S4F2_GLYSO	AT3G51800.2	metallopeptidase M24 family protein	Medtr7g069390.1	proliferation-associated 2G4-like protein
Ca25658	Ca3	28811228	28813741	-0.431278	3.66997	-4.74598	8.46152e-05	0.000793009	1.19106	Uncharacterized protein n_7 Tax_Papilionoideae RepID_A0A0S3RTW7_PHAAN	AT3G08890.2	Protein of unknown function, DUF538	Medtr7g070000.1	DUF538 family protein
Ca25662	Ca3	28914958	28917079	0.4678	6.67462	5.08834	3.59328e-05	0.00042604	1.99151	Os04g0502300 protein n_15 Tax_Poaceae RepID_Q0JBY8_ORYSJ	AT3G48930.1	Nucleic acid-binding, OB-fold-like protein	Medtr8g076830.1	40S ribosomal protein S11-1
Ca25661	Ca3	28942513	28951619	0.928148	3.17419	5.85596	5.4126e-06	0.000115032	3.9162	PREDICTED: LOW QUALITY PROTEIN: nucleolar complex protein 3 homolog n_1 Tax_Cicer arietinum RepID_UPI00032A814B	AT1G79150.1	binding	Medtr7g070240.1	nucleolar complex-associated protein
Ca25680	Ca3	29154954	29170721	-1.22638	0.681228	-7.35035	1.62119e-07	1.19272e-05	7.38296	UDP-glycosyltransferase n_1 Tax_Cicer arietinum RepID_A0A067XT78_CICAR	AT2G15490.3	UDP-glycosyltransferase 73B4	Medtr7g070800.1	UDP-glucosyltransferase family protein
Ca25695	Ca3	29377577	29381541	0.498369	4.78304	6.37869	1.53951e-06	4.85878e-05	5.13139	PREDICTED: alpha-soluble NSF attachment protein 2-like isoform X1 n_1 Tax_Cicer arietinum RepID_UPI00032A7A95	AT3G56190.2	alpha-soluble NSF attachment protein 2	Medtr7g072000.3	alpha-soluble NSF attachment protein
Ca25760	Ca3	30124692	30127382	0.581844	5.5357	4.91618	5.52423e-05	0.000589624	1.56337	PREDICTED: receptor-like protein kinase FERONIA n_1 Tax_Cicer arietinum RepID_UPI00032AA793	AT3G51550.1	Malectin/receptor-like protein kinase family protein	Medtr7g073660.1	feronia receptor-like kinase
Ca25755	Ca3	30193770	30197801	-0.489989	5.75711	-6.2306	2.19155e-06	6.17306e-05	4.77111	PREDICTED: probable acetyltransferase NSI n_1 Tax_Cicer arietinum RepID_UPI00032A5019	#N/A	#N/A	Medtr7g073990.1	acetyltransferase NSI-like protein
Ca25758	Ca3	30234987	30240150	0.424535	4.87936	4.83688	6.73743e-05	0.000680192	1.36902	RNA-binding KH domain protein n_2 Tax_Papilionoideae RepID_G7KY84_MEDTR	AT2G38610.2	RNA-binding KH domain-containing protein	Medtr8g005550.1	RNA-binding KH domain protein
Ca25776	Ca3	30337484	30341076	0.463399	4.09467	7.38443	1.50141e-07	1.13684e-05	7.46146	PREDICTED: uncharacterized protein LOC101512486 n_1 Tax_Cicer arietinum RepID_UPI00032A8827	AT3G54190.1	Transducin/WD40 repeat-like superfamily protein	Medtr7g074450.1	transducin/WD40 repeat protein
Ca25781	Ca3	30355536	30360571	0.486587	7.89549	6.7749	6.0613e-07	2.68787e-05	6.03659	Uncharacterized protein n_10 Tax_Papilionoideae RepID_I1L6W0_SOYBN	AT1G09780.1	Phosphoglycerate mutase, 2,3-bisphosphoglycerate-independent	Medtr7g074570.2	2%2C3-bisphosphoglycerate-independent phosphoglycerate mutase
Ca25801	Ca3	30678007	30678598	-0.710958	3.02245	-5.6642	8.64539e-06	0.000154616	3.5251	PREDICTED: uncharacterized protein LOC101502833 n_1 Tax_Cicer arietinum RepID_UPI00032A9AA5	#N/A	#N/A	Medtr7g075120.1	hypothetical protein
Ca25821	Ca3	30969952	30972069	0.786855	0.968316	5.37933	1.74386e-05	0.000254751	3.02132	PREDICTED: ataxin-10 n_1 Tax_Cicer arietinum RepID_UPI00032A861D	AT4G00231.1	ARM repeat superfamily protein	Medtr7g075940.1	ARM repeat protein
Ca25868	Ca3	31312202	31316563	-0.554887	5.64717	-5.32578	1.99116e-05	0.000279215	2.57331	PREDICTED: uncharacterized protein LOC101494441 n_1 Tax_Cicer arietinum RepID_UPI00032A71C7	AT4G23890.1	PF11623 - Protein of unknown function (DUF3252) (DUF3252) (1 of 1)	Medtr7g076620.2	hypothetical protein
Ca25864	Ca3	31318200	31323640	0.361485	3.6198	4.73653	8.66445e-05	0.000806647	1.1898	PREDICTED: pumilio homolog 23 n_1 Tax_Cicer arietinum RepID_UPI00032AAA94	AT1G72320.1	pumilio 23	Medtr7g117545.1	pumilio-family RNA-binding repeatprotein
Ca25875	Ca3	31517973	31522999	-0.40183	4.24941	-4.92729	5.37273e-05	0.000575462	1.60856	LRR receptor-like kinase n_2 Tax_Papilionoideae RepID_G7L3M7_MEDTR	AT4G00710.1	BR-signaling kinase 3	Medtr7g077150.2	LRR receptor-like kinase
Ca25926	Ca3	31583622	31591348	-0.388966	3.82683	-5.15824	3.01898e-05	0.000377983	2.2128	Beta-amylase n_2 Tax_Papilionoideae RepID_A0A072U1V6_MEDTR	AT2G45880.1	beta-amylase 7	Medtr7g077410.1	beta-amylase-like protein
Ca25927	Ca3	31710555	31715761	1.03356	4.2574	9.3225	2.45969e-09	6.48636e-07	11.5442	PREDICTED: U-box domain-containing protein 33 isoform X1 n_2 Tax_Cicer arietinum RepID_UPI00032A5842	AT2G45910.1	U-box domain-containing protein kinase family protein	Medtr7g077780.1	U-box kinase family protein
Ca25928	Ca3	31772728	31778204	-0.790445	7.50879	-7.25954	1.99058e-07	1.33823e-05	7.16413	Phosphate transporter n_2 Tax_Papilionoideae RepID_G7L4P4_MEDTR	AT4G00370.1	Major facilitator superfamily protein	Medtr7g077830.1	phosphate transporter
Ca25943	Ca3	32005373	32005686	-0.808339	2.68606	-7.20629	2.24629e-07	1.44357e-05	7.14735	No Hits	#N/A	#N/A	#N/A
Ca25940	Ca3	32015616	32019421	-0.37327	5.99683	-4.89202	5.86849e-05	0.000616474	1.50346	Brassinosteroid insensitive 1-associated receptor kinase n_2 Tax_Papilionoideae RepID_G7L6L4_MEDTR	AT1G01540.1	Protein kinase superfamily protein	Medtr7g078730.1	brassinosteroid insensitive 1-associated receptor kinase
Ca25946	Ca3	32170373	32174460	-0.796978	4.61472	-7.88146	4.98806e-08	5.29055e-06	8.55569	Proline iminopeptidase-like protein n_2 Tax_Medicago truncatula RepID_G7L6P1_MEDTR	AT3G61540.1	alpha/beta-Hydrolases superfamily protein	Medtr7g079030.2	proline iminopeptidase-like protein
Ca25974	Ca3	32369220	32372317	-0.616846	6.17894	-5.88208	5.07958e-06	0.000110989	3.935	PREDICTED: CBS domain-containing protein CBSX6 n_1 Tax_Cicer arietinum RepID_UPI00032A9BA5	AT1G65320.1	Cystathionine beta-synthase (CBS) family protein	Medtr7g079680.1	CBS domain CBSX5-like protein
Ca25993	Ca3	32435022	32442887	-0.588449	7.68749	-5.37611	1.75781e-05	0.000256055	2.6969	Zinc finger CCCH domain-containing protein ZFN-like n_6 Tax_Papilionoideae RepID_ZFNL_PEA	AT3G02830.1	zinc finger protein 1	Medtr7g079840.2	zinc finger CCCH domain protein
Ca25971	Ca3	32527758	32534548	0.525515	4.922	5.45371	1.45101e-05	0.000222376	2.89228	PREDICTED: isopentenyl-diphosphate Delta-isomerase I n_1 Tax_Cicer arietinum RepID_UPI00032AA9DF	AT3G02780.1	isopentenyl pyrophosphate:dimethylallyl pyrophosphate isomerase 2	Medtr7g080060.1	isopentenyl-diphosphate delta-isomerase
Ca26037	Ca3	33050057	33052814	-0.298039	3.88696	-5.08528	3.62083e-05	0.00042798	2.02506	PREDICTED: uncharacterized protein LOC101503595 n_1 Tax_Cicer arietinum RepID_UPI00032A992E	AT5G23520.1	smr (Small MutS Related) domain-containing protein	Medtr7g081260.2	Smr (small MutS-related) domain protein
Ca26247	Ca3	33276077	33278521	-0.525818	1.8375	-4.89463	5.83023e-05	0.000614564	1.8325	PREDICTED: probable LRR receptor-like serine/threonine-protein kinase At4g08850 n_2 Tax_Cicer arietinum RepID_UPI00032A6028	AT4G08850.2	Leucine-rich repeat receptor-like protein kinase family protein	Medtr7g081720.1	LRR receptor-like kinase
Ca26063	Ca3	33318800	33322869	0.43721	6.82989	6.30784	1.82231e-06	5.37037e-05	4.95597	PREDICTED: protein SQS1-like n_1 Tax_Cicer arietinum RepID_UPI00032ACCAA	#N/A	#N/A	Medtr7g081660.1	nuclear RNA-binding-like protein
Ca26065	Ca3	33372905	33375799	0.735551	2.63564	4.95082	5.06568e-05	0.000550281	1.82917	PREDICTED: serine/threonine-protein kinase D6PK-like n_1 Tax_Cicer arietinum RepID_UPI00032A532B	AT2G44830.1	Protein kinase superfamily protein	Medtr7g081665.1	Serine/Threonine kinase family protein
Ca26075	Ca3	33762851	33766447	0.290699	7.20887	4.75338	8.30596e-05	0.000783229	1.16033	PREDICTED: ATP-dependent Clp protease proteolytic subunit 3 - chloroplastic n_1 Tax_Cicer arietinum RepID_UPI00064168D5	AT1G66670.1	CLP protease proteolytic subunit 3	Medtr7g082980.1	ATP-dependent Clp protease proteolytic protein
Ca26102	Ca3	33788002	33791426	0.937409	2.93416	6.80674	5.62854e-07	2.54819e-05	6.24969	PREDICTED: uncharacterized protein LOC101498821 n_1 Tax_Cicer arietinum RepID_UPI00032AB887	AT2G39650.1	Protein of unknown function (DUF506)	Medtr7g083080.1	plant-specific domain TIGR01615 family protein
Ca26087	Ca3	33924706	33925946	-1.02353	2.83556	-7.19277	2.31643e-07	1.47423e-05	7.12721	PREDICTED: NAC domain-containing protein 45-like n_1 Tax_Cicer arietinum RepID_UPI00032A68E9	#N/A	#N/A	Medtr7g083330.1	NAC transcription factor-like protein
Ca26091	Ca3	33939017	33941792	-1.33449	1.7907	-4.7509	8.35774e-05	0.000786656	1.3799	Glycerophosphoryl diester phosphodiesterase family protein n_3 Tax_Papilionoideae RepID_G7KW66_MEDTR	AT5G41080.2	PLC-like phosphodiesterases superfamily protein	Medtr7g083410.1	glycerophosphoryl diester phosphodiesterase family protein
Ca26088	Ca3	33961308	33966643	-0.233877	5.00506	-4.7217	8.99287e-05	0.000825111	1.08145	PREDICTED: probable protein S-acyltransferase 7 n_1 Tax_Cicer arietinum RepID_UPI00032A7558	AT3G26935.1	DHHC-type zinc finger family protein	Medtr7g083480.1	DHHC type zinc finger protein
Ca26129	Ca3	33998020	34000782	0.332103	5.53277	5.49442	1.31232e-05	0.000205235	2.98831	Translocon-associated protein beta family-like protein n_3 Tax_Papilionoideae RepID_G7KW77_MEDTR	AT5G14030.4	translocon-associated protein beta (TRAPB) family protein	Medtr7g083560.2	translocon-associated protein beta family-like protein
Ca26149	Ca3	34297175	34300235	0.706994	3.28269	5.58295	1.05534e-05	0.000176377	3.3001	PREDICTED: protein Mpv17-like - partial n_1 Tax_Cicer arietinum RepID_UPI00064134A4	AT5G19750.1	Peroxisomal membrane 22 kDa (Mpv17/PMP22) family protein	#N/A
Ca26140	Ca3	34420093	34421308	0.693954	1.77447	5.81966	5.91277e-06	0.000121549	4.01884	PREDICTED: UPF0496 protein At3g19330-like n_1 Tax_Cicer arietinum RepID_UPI00032A698C	AT3G19330.1	Protein of unknown function (DUF677)	Medtr7g084240.3	transmembrane protein%2C putative
Ca26139	Ca3	34455828	34458023	1.29021	7.83331	6.01212	3.70644e-06	8.9665e-05	4.2341	Uncharacterized protein n_16 Tax_fabids RepID_I1N828_SOYBN	AT5G13930.1	Chalcone and stilbene synthase family protein	Medtr7g084300.1	chalcone and stilbene synthase family protein
Ca26198	Ca3	34577175	34580083	-0.792844	4.8394	-9.24255	2.8861e-09	7.11981e-07	11.3821	Substrate carrier family protein n_3 Tax_Papilionoideae RepID_A0A072UCC3_MEDTR	AT5G51050.1	Mitochondrial substrate carrier family protein	Medtr7g084400.1	substrate carrier family protein
Ca26180	Ca3	34714705	34717722	-0.55651	5.05164	-5.12484	3.28084e-05	0.00039889	2.08157	PREDICTED: pentatricopeptide repeat-containing protein At3g26630 - chloroplastic n_1 Tax_Cicer arietinum RepID_UPI00064172E4	AT3G26630.1	Tetratricopeptide repeat (TPR)-like superfamily protein	Medtr7g084830.1	PPR containing plant-like protein
Ca26184	Ca3	34927347	34930425	0.417754	5.32012	4.84076	6.67221e-05	0.000676734	1.376	PREDICTED: uncharacterized protein LOC101500308 n_1 Tax_Cicer arietinum RepID_UPI00032ABDBC	AT2G39050.1	hydroxyproline-rich glycoprotein family protein	Medtr7g085240.1	ricin-type beta-trefoil lectin domain protein
Ca26183	Ca3	34974077	34976250	1.01545	4.66447	5.12641	3.268e-05	0.000398279	2.11247	PREDICTED: thioredoxin-like 1-1 - chloroplastic n_1 Tax_Cicer arietinum RepID_UPI00032A7AC8	AT1G08570.1	atypical CYS HIS rich thioredoxin 4	Medtr7g085310.2	thioredoxin-like protein 1-1
Ca26349	Ca3	35015650	35020391	-0.565073	5.98931	-6.31481	1.79228e-06	5.32385e-05	4.9739	PREDICTED: uncharacterized protein LOC101502729 n_1 Tax_Cicer arietinum RepID_UPI00032ABEEC	#N/A	#N/A	Medtr7g085420.2	HNH endonuclease domain protein
Ca26195	Ca3	35022445	35025078	-0.446707	3.6529	-4.74653	8.44996e-05	0.000792411	1.20205	PHD finger protein ING n_3 Tax_Papilionoideae RepID_A2Q5P5_MEDTR	AT1G54390.4	PHD finger protein-related	Medtr7g085450.1	PHD finger-like protein
Ca26223	Ca3	35254069	35261417	-0.642427	6.64518	-8.48678	1.36269e-08	2.17435e-06	9.83829	No Hits	AT3G03790.3	ankyrin repeat family protein / regulator of chromosome condensation (RCC1) family protein	Medtr7g086050.1	regulator of chromosome condensation (RCC1) family protein
Ca26225	Ca3	35261690	35261900	-0.954887	2.5948	-6.70695	7.10229e-07	2.94389e-05	6.0304	No Hits	#N/A	#N/A	#N/A
Ca26211	Ca3	35358019	35366177	0.782942	0.727148	6.21267	2.28768e-06	6.37342e-05	4.92379	PREDICTED: pentatricopeptide repeat-containing protein At4g39530 n_1 Tax_Cicer arietinum RepID_UPI00032AA758	AT4G39530.1	Tetratricopeptide repeat (TPR)-like superfamily protein	Medtr8g098250.1	PPR containing plant-like protein
Ca26228	Ca3	35388382	35390768	0.610114	2.9233	4.82253	6.98398e-05	0.000695266	1.40344	2-aminoethanethiol dioxygenase-like protein n_3 Tax_Papilionoideae RepID_Q2HVC5_MEDTR	AT5G15120.1	Protein of unknown function (DUF1637)	Medtr7g086380.1	2-aminoethanethiol dioxygenase-like protein
Ca26232	Ca3	35434443	35437871	0.762087	1.60298	5.64246	9.11859e-06	0.000160309	3.58242	PREDICTED: uncharacterized protein LOC101495749 n_1 Tax_Cicer arietinum RepID_UPI00032A770D	AT4G23620.1	Ribosomal protein L25/Gln-tRNA synthetase, anti-codon-binding domain	Medtr7g086470.2	50S ribosomal protein L25%2C putative
Ca26264	Ca3	35718947	35722338	1.80078	0.471928	4.74086	8.57094e-05	0.000799964	1.41105	PREDICTED: uncharacterized protein LOC101515079 n_1 Tax_Cicer arietinum RepID_UPI00032A61B8	#N/A	#N/A	#N/A
Ca26259	Ca3	35726399	35730373	0.519477	2.00947	4.9953	4.53265e-05	0.000507518	2.01674	PREDICTED: frataxin - mitochondrial n_1 Tax_Cicer arietinum RepID_UPI00032AC38E	#N/A	#N/A	Medtr6g071700.1	iron donor protein CyaY
Ca26255	Ca3	35732426	35734927	0.826314	2.23494	5.16441	2.97295e-05	0.000373941	2.38202	PREDICTED: p21-activated protein kinase-interacting protein 1-like n_1 Tax_Cicer arietinum RepID_UPI00032A6CB7	AT1G65030.1	Transducin/WD40 repeat-like superfamily protein	Medtr2g049300.1	p21-activated kinase-interacting-like protein
Ca26263	Ca3	35778607	35779908	-0.409901	2.74256	-5.15405	3.05058e-05	0.000379031	2.35089	PREDICTED: myb-related protein 306 n_1 Tax_Cicer arietinum RepID_UPI00032A6154	AT1G08810.1	myb domain protein 60	Medtr7g087130.1	myb transcription factor
Ca26284	Ca3	35809154	35812900	2.10294	3.88146	7.46187	1.26182e-07	1.00355e-05	7.67816	Protein DETOXIFICATION n_3 Tax_Papilionoideae RepID_G7L2P1_MEDTR	AT1G33110.2	MATE efflux family protein, transmembrane transport, antiporter activity	Medtr7g087410.1	MATE efflux family protein
Ca26252	Ca3	35894817	35897072	1.26434	5.0059	7.21961	2.17934e-07	1.41842e-05	7.07739	Serine hydrolase n_3 Tax_Papilionoideae RepID_G7L2Q8_MEDTR	#N/A	#N/A	Medtr7g087570.1	serine hydrolase
Ca28089	Ca3	36002724	36007369	0.324387	5.89492	5.35015	1.8745e-05	0.000267448	2.63645	Translocase of chloroplast 34 n_1 Tax_Pisum sativum RepID_TOC34_PEA	AT5G05000.3	translocon at the outer envelope membrane of chloroplasts 34	Medtr7g088050.2	translocon at the outer envelope membrane ofs protein
Ca26306	Ca3	36257982	36260228	0.647182	5.60776	5.25033	2.40107e-05	0.000318942	2.39023	Nascent proteinassociated complex alpha chain n_3 Tax_Papilionoideae RepID_G7L4T7_MEDTR	AT5G13850.1	nascent polypeptide-associated complex subunit alpha-like protein 3	Medtr7g088680.1	nascent proteinassociated complex alpha chain
Ca26302	Ca3	36406696	36409879	1.00256	5.64586	8.86333	6.22999e-09	1.24185e-06	10.6157	PREDICTED: protein NRT1/ PTR FAMILY 3.1-like n_1 Tax_Cicer arietinum RepID_UPI0006410332	AT1G68570.1	Major facilitator superfamily protein	Medtr7g088790.1	peptide/nitrate transporter
Ca26384	Ca3	36889979	36893511	1.07843	2.03258	5.12946	3.2433e-05	0.000396851	2.30755	PREDICTED: pentatricopeptide repeat-containing protein At1g80270 - mitochondrial-like isoform X1 n_2 Tax_Cicer arietinum RepID_UPI00032A6CB3	AT1G80270.3	PENTATRICOPEPTIDE REPEAT 596	Medtr7g089770.1	DNA-binding protein
Ca26389	Ca3	36903794	36916133	0.516217	5.90138	5.7407	7.16909e-06	0.000139456	3.59181	DNA gyrase subunit B n_2 Tax_Papilionoideae RepID_G7KQS0_MEDTR	AT5G42090.1	Lung seven transmembrane receptor family protein	Medtr7g089790.1	DNA gyrase subunit B
Ca26356	Ca3	37046773	37051579	1.36369	2.31598	6.35834	1.61579e-06	5.02308e-05	5.27355	PREDICTED: protein ECERIFERUM 1-like n_1 Tax_Cicer arietinum RepID_UPI00032AA1FD	AT1G02205.1	Fatty acid hydroxylase superfamily	Medtr7g090140.2	fatty acid hydroxylase superfamily protein
Ca26370	Ca3	37107942	37110068	0.44249	1.50075	4.63145	0.000112787	0.000959973	1.23838	Uncharacterized protein n_1 Tax_Medicago truncatula RepID_G7KRN5_MEDTR	#N/A	#N/A	Medtr7g090260.1	hypothetical protein
Ca26452	Ca3	37775241	37779906	1.63225	4.88935	4.72498	8.91925e-05	0.000821185	1.1018	Alkaline alpha-galactosidase n_4 Tax_Papilionoideae RepID_B3F0K7_PEA	AT3G57520.1	seed imbibition 2	Medtr7g091880.1	galactinol-raffinose galactosyltransferase
Ca26410	Ca3	37818680	37821796	-0.521872	4.74272	-5.18578	2.81898e-05	0.000360203	2.23867	Cytosolic guanylate kinase n_6 Tax_Papilionoideae RepID_W8VZ39_PEA	AT3G57550.2	guanylate kinase	Medtr7g092020.4	guanylate kinase-like protein
Ca26409	Ca3	37845853	37848767	0.759236	5.32661	5.23811	2.4751e-05	0.000326632	2.36089	ARM repeat CCCH-type zinc finger protein n_2 Tax_Papilionoideae RepID_A2Q3L5_MEDTR	AT2G41900.1	CCCH-type zinc finger protein with ARM repeat domain	Medtr7g092070.1	ARM repeat CCCH-type zinc finger protein
Ca26429	Ca3	37888095	37891005	0.418073	6.59138	6.20899	2.30789e-06	6.41803e-05	4.72198	Adenylosuccinate synthetase n_3 Tax_Papilionoideae RepID_G7KTL4_MEDTR	AT3G57610.1	adenylosuccinate synthase	Medtr7g092260.1	adenylosuccinate synthetase
Ca26425	Ca3	37978897	37982124	1.23724	1.76246	4.60276	0.000121214	0.00101261	1.18711	PREDICTED: probably inactive leucine-rich repeat receptor-like protein kinase At5g06940 n_1 Tax_Cicer arietinum RepID_UPI00032A98AE	AT5G06940.1	Leucine-rich repeat receptor-like protein kinase family protein	Medtr7g092430.1	LRR receptor-like kinase family protein
Ca26474	Ca3	38246300	38249185	0.658921	3.49443	4.78718	7.63097e-05	0.00073948	1.33478	Uncharacterized protein n_6 Tax_Phaseoleae RepID_V7CYE7_PHAVU	AT3G12130.1	KH domain-containing protein / zinc finger (CCCH type) family protein	Medtr7g093130.1	zinc finger C-x8-C-x5-C-x3-H type family protein
Ca26476	Ca3	38263820	38265689	0.502425	9.19084	4.87908	6.06175e-05	0.000632	1.41953	Oleate desaturase n_4 Tax_Papilionoideae RepID_A4ZYU3_9FABA	AT3G12120.2	fatty acid desaturase 2	Medtr7g093200.1	microsomal omega-3 fatty acid desaturase
Ca26499	Ca3	38550297	38551693	2.39996	1.02107	4.97906	4.72039e-05	0.000521288	2.07594	PREDICTED: gibberellin receptor GID1B-like n_1 Tax_Cicer arietinum RepID_UPI00032A9060	AT3G63010.1	alpha/beta-Hydrolases superfamily protein,positive regulation of gibberellic acid mediated signaling pathway,gibberellin mediated signaling pathway	Medtr7g093950.1	gibberellin receptor GID1c-like protein
Ca26524	Ca3	38614154	38618132	0.740778	4.36975	5.44579	1.47966e-05	0.000225638	2.87594	Elongation factor Tu n_1 Tax_Medicago truncatula RepID_A0A072U201_MEDTR	AT4G02930.1	GTP binding Elongation factor Tu family protein	Medtr7g094460.1	GTP-binding elongation factor Tu family protein
Ca26532	Ca3	38646933	38647700	1.59911	2.16858	5.32119	2.01395e-05	0.00028049	2.79864	PREDICTED: short-chain type dehydrogenase/reductase-like - partial n_1 Tax_Cicer arietinum RepID_UPI000640FEEA	AT3G03980.1	NAD(P)-binding Rossmann-fold superfamily protein	Medtr7g094520.1	short-chain dehydrogenase/reductase
Ca26574	Ca3	39026435	39029305	-0.888844	2.40033	-4.72827	8.84584e-05	0.000816518	1.3854	PREDICTED: type I inositol 1 -4 -5-trisphosphate 5-phosphatase CVP2-like n_1 Tax_Cicer arietinum RepID_UPI00032AC5F4	AT3G63240.1	DNAse I-like superfamily protein	Medtr7g095260.1	type I inositol 1%2C4%2C5-trisphosphate 5-phosphatase CVP2
Ca26590	Ca3	39111695	39121896	-1.12825	3.97529	-5.43868	1.50585e-05	0.000228491	2.93335	PREDICTED: heat stress transcription factor A-6b n_1 Tax_Cicer arietinum RepID_UPI00032AAAAD	AT3G22830.1	heat shock transcription factor A6B	Medtr7g095680.1	heat shock transcription factor A3
Ca26608	Ca3	39655342	39657264	1.03668	1.69471	5.79243	6.31861e-06	0.000126933	3.92611	PREDICTED: H/ACA ribonucleoprotein complex subunit 3-like protein n_1 Tax_Cicer arietinum RepID_UPI00032AA111	#N/A	#N/A	#N/A
Ca26649	Ca3	39814961	39821309	-0.412128	2.04179	-4.66216	0.00010442	0.000910583	1.22388	PREDICTED: histone-lysine N-methyltransferase SUVR2-like n_1 Tax_Cicer arietinum RepID_UPI00032A5C6C	AT5G43990.5	SET-domain containing protein lysine methyltransferase family protein	Medtr7g098390.1	histone-lysine N-methyltransferase SUVR2-like protein
Ca26642	Ca3	39856052	39861928	0.377285	5.67685	5.57105	1.08668e-05	0.000179684	3.17741	PREDICTED: putative G3BP-like protein n_1 Tax_Cicer arietinum RepID_UPI00032AB35E	AT5G43960.1	Nuclear transport factor 2 (NTF2) family protein with RNA binding (RRM-RBD-RNP motifs) domain	Medtr7g098440.1	ras GTPase-activating binding-like protein
Ca26679	Ca3	39982418	39986139	0.575976	4.68025	6.31392	1.79608e-06	5.32385e-05	4.97737	Transducin/WD-like repeat-protein n_2 Tax_Papilionoideae RepID_G7KYH2_MEDTR	AT2G20330.1	Transducin/WD40 repeat-like superfamily protein	Medtr7g098900.1	transducin/WD-like repeat-protein
Ca26665	Ca3	40244915	40249852	-0.765045	5.24355	-6.85165	5.07127e-07	2.38662e-05	6.22999	PREDICTED: uncharacterized protein LOC101495526 n_1 Tax_Cicer arietinum RepID_UPI000641081A	AT3G09450.1	PTHR30509:SF9 - F3L24.34 PROTEIN (1 of 1)	Medtr7g099710.1	fusaric acid resistance family protein
Ca26700	Ca3	40283050	40317013	-0.471793	3.90776	-4.69664	9.57634e-05	0.000858559	1.06786	PREDICTED: cation/H(+) antiporter 20-like n_1 Tax_Cicer arietinum RepID_UPI00032AD2C5	AT4G23160.1	cysteine-rich RLK (RECEPTOR-like protein kinase) 8	Medtr7g099800.1	cation/H+ exchanger 3
Ca26703	Ca3	40379181	40382652	1.43205	2.41266	7.02459	3.40243e-07	1.8769e-05	6.68332	PREDICTED: uncharacterized protein LOC101499143 n_1 Tax_Cicer arietinum RepID_UPI00032AA556	AT3G53630.1	#N/A	Medtr7g099970.1	hypothetical protein
Ca26730	Ca3	40629134	40629893	-0.420987	4.72874	-4.86767	6.23745e-05	0.000645043	1.45175	PREDICTED: uncharacterized protein LOC101511108 n_1 Tax_Cicer arietinum RepID_UPI00032AD3BE	AT3G53470.2	#N/A	Medtr7g061255.1	transmembrane protein%2C putative
Ca26756	Ca3	40752709	40754248	-0.478982	4.04738	-4.98272	4.67743e-05	0.000518039	1.77614	PREDICTED: uncharacterized protein LOC101488954 isoform X3 n_1 Tax_Cicer arietinum RepID_UPI000640CF39	#N/A	#N/A	Medtr7g100830.1	protamine P1 family protein
Ca26774	Ca3	40851327	40856274	0.650139	4.27854	4.74525	8.477e-05	0.000793973	1.17408	PREDICTED: probable E3 ubiquitin-protein ligase LOG2 n_1 Tax_Cicer arietinum RepID_UPI00032AAECA	AT3G09770.2	RING/U-box superfamily protein	Medtr7g101150.1	E3 ubiquitin-protein ligase%2C putative
Ca26778	Ca3	40861030	40863104	1.17819	1.99101	5.86226	5.33033e-06	0.000114024	4.12624	PREDICTED: V-type proton ATPase subunit G1-like n_1 Tax_Cicer arietinum RepID_UPI00032A71D1	AT3G01390.2	vacuolar membrane ATPase 10,proton transmembrane transport	Medtr7g101170.1	vacuolar (H+)-ATPase G subunit
Ca26739	Ca3	40945325	40949099	-0.363082	7.06051	-5.2696	2.28889e-05	0.000308445	2.44051	Phenylalanine ammonia-lyase 1 n_10 Tax_Papilionoideae RepID_PAL1_PEA	AT2G37040.1	PHE ammonia lyase 1	Medtr7g101395.1	phenylalanine ammonia-lyase-like protein
Ca26760	Ca3	41017291	41022930	-0.544181	5.02594	-4.84876	6.53989e-05	0.000668634	1.39483	PREDICTED: uncharacterized protein LOC101498248 n_1 Tax_Cicer arietinum RepID_UPI00032A5117	#N/A	#N/A	Medtr1g063900.2	cysteine proteinase superfamily protein
Ca26800	Ca3	41654466	41657922	-0.520635	5.92495	-6.551	1.02403e-06	3.7115e-05	5.52853	PREDICTED: zinc finger protein CONSTANS-LIKE 2 n_1 Tax_Cicer arietinum RepID_UPI00032A5F59	AT5G15850.1	CONSTANS-like 1	Medtr7g018170.1	zinc finger constans-like protein
Ca26844	Ca3	42004000	42009346	0.574399	4.93421	5.99576	3.85598e-06	9.11549e-05	4.20891	Pmr5/Cas1p GDSL/SGNH-like acyl-esterase family protein n_3 Tax_Papilionoideae RepID_A0A072TWN3_MEDTR	AT5G15900.1	TRICHOME BIREFRINGENCE-LIKE 19	Medtr7g019120.1	Pmr5/Cas1p GDSL/SGNH-like acyl-esterase family protein
Ca26854	Ca3	42172500	42177150	-0.527046	5.08723	-5.58499	1.05007e-05	0.000175982	3.21325	PREDICTED: binding partner of ACD11 1 n_1 Tax_Cicer arietinum RepID_UPI00032AAA00	AT3G01210.1	RNA-binding (RRM/RBD/RNP motifs) family protein	Medtr7g010100.1	RNA recognition motif%2C a.k.a. RRM%2C RBD protein
Ca26868	Ca3	42299588	42301620	-0.750017	3.59278	-8.18358	2.59428e-08	3.4504e-06	9.23326	PREDICTED: myb-related protein 306-like n_1 Tax_Cicer arietinum RepID_UPI00032AC44C	AT3G28910.1	myb domain protein 30	Medtr7g010210.1	R2R3-myb transcription factor
Ca26934	Ca3	43040784	43043620	-1.49629	1.13156	-5.84851	5.51167e-06	0.000116117	4.02942	PREDICTED: cytochrome P450 71A1-like n_1 Tax_Cicer arietinum RepID_UPI00032A5D0B	AT4G31500.1	cytochrome P450, family 83, subfamily B, polypeptide 1	Medtr7g012330.1	cytochrome P450 family 71 protein
Ca26928	Ca3	43107090	43111194	0.320683	2.8352	4.82808	6.88764e-05	0.00068944	1.50706	No Hits	#N/A	#N/A	#N/A
Ca26939	Ca3	43233258	43237705	-0.381216	9.60602	-5.78433	6.44471e-06	0.000128852	3.64481	Cystathionine gamma-synthase n_1 Tax_Cicer arietinum RepID_L0EK12_CICAR	AT3G01120.1	Pyridoxal phosphate (PLP)-dependent transferases superfamily protein	Medtr7g011230.1	cystathionine gamma-synthase
Ca26948	Ca3	43357205	43361397	-0.344353	4.77502	-5.02057	4.25539e-05	0.000483912	1.82456	Uncharacterized protein n_2 Tax_Medicago truncatula RepID_G7L326_MEDTR	AT5G39510.1	Vesicle transport v-SNARE family protein	Medtr7g011570.2	vesicle transport V-SNARE protein amine-terminal protein
Ca26969	Ca3	43562486	43568430	-0.514738	4.79038	-6.04372	3.4341e-06	8.45807e-05	4.32487	PREDICTED: probable WRKY transcription factor 4 n_1 Tax_Cicer arietinum RepID_UPI00032AC7A3	AT1G13960.2	WRKY DNA-binding protein 4	Medtr7g011820.1	WRKY transcription factor 3
Ca27061	Ca3	44401065	44406024	-0.405334	3.06375	-5.47213	1.38651e-05	0.000213992	3.05541	Chromosome condensation regulator RCC1 repeat protein n_3 Tax_Papilionoideae RepID_G7KR17_MEDTR	AT3G02300.1	Regulator of chromosome condensation (RCC1) family protein	Medtr7g016640.2	chromosome condensation regulator RCC1 repeat protein
Ca27192	Ca3	44744321	44813361	-0.77561	6.56988	-6.67414	7.66876e-07	3.0742e-05	5.82085	PREDICTED: copper transport protein CCH-like n_1 Tax_Cicer arietinum RepID_UPI00032AC7A2	AT5G45910.1	GDSL-like Lipase/Acylhydrolase superfamily protein	Medtr6g045307.1	IPP transferase
Ca27084	Ca3	44947148	44958180	-0.641166	4.89233	-5.76598	6.7398e-06	0.000133242	3.65296	Carboxypeptidase n_2 Tax_Papilionoideae RepID_A0A072TVX1_MEDTR	AT3G02110.1	serine carboxypeptidase-like 25	Medtr7g013790.1	serine carboxypeptidase-like protein
Ca27067	Ca3	45240426	45241887	-0.518518	5.62062	-6.53958	1.05198e-06	3.777e-05	5.50157	PREDICTED: malonyl-CoA:anthocyanidin 5-O-glucoside-6''''''''-O-malonyltransferase-like n_1 Tax_Cicer arietinum RepID_UPI00032A8D34	AT5G39090.1	HXXXD-type acyl-transferase family protein	Medtr7g014330.1	anthocyanin 5-aromatic acyltransferase
Ca27249	Ca3	45962018	45967467	-0.409084	5.15086	-4.69745	9.55699e-05	0.000858559	1.01975	Uncharacterized protein n_12 Tax_Papilionoideae RepID_I1JPQ0_SOYBN	AT2G36910.1	ATP binding cassette subfamily B1	Medtr7g102070.1	ABC transporter B family protein
Ca27139	Ca3	46158123	46159573	0.74022	10.2023	7.07606	3.0236e-07	1.73206e-05	6.67485	Probable aquaporin TIP-type n_7 Tax_Papilionoideae RepID_TIP1_MEDSA	AT2G36830.1	gamma tonoplast intrinsic protein	Medtr7g103030.1	tonoplast intrinsic protein
Ca27181	Ca3	46200907	46207108	1.26992	2.74644	5.16459	2.97158e-05	0.000373941	2.29377	Transducin family protein/WD-40 repeat protein n_2 Tax_Papilionoideae RepID_A0A072USV0_MEDTR	AT3G21540.1	transducin family protein / WD-40 repeat family protein	Medtr4g123597.1	transducin family protein/WD-40 repeat protein
Ca27144	Ca3	46477413	46479145	-0.948676	3.49222	-6.77031	6.12642e-07	2.70773e-05	6.14086	PREDICTED: cytochrome P450 76A1 n_1 Tax_Cicer arietinum RepID_UPI00032ABDEA	AT1G33730.1	cytochrome P450, family 76, subfamily C, polypeptide 5	Medtr7g103450.1	cytochrome P450 family protein
Ca27154	Ca3	46531066	46533656	0.277843	5.03449	4.96703	4.86448e-05	0.000533349	1.68952	Splicing factor U2af small subunit A-like protein n_3 Tax_Papilionoideae RepID_A0A072U424_MEDTR	AT1G27650.1	U2 snRNP auxiliary factor small subunit, putative	Medtr7g103630.1	splicing factor U2af small subunit A-like protein
Ca27176	Ca3	46604033	46607575	0.61164	3.62988	6.41472	1.41327e-06	4.58937e-05	5.27259	PREDICTED: uncharacterized protein LOC101499859 n_1 Tax_Cicer arietinum RepID_UPI00032A8AF0	#N/A	#N/A	Medtr1g060890.1	hypothetical protein
Ca27217	Ca3	47025847	47027871	-0.814832	5.19224	-4.86651	6.25554e-05	0.000645604	1.44165	PREDICTED: 1-aminocyclopropane-1-carboxylate oxidase homolog 4-like n_1 Tax_Cicer arietinum RepID_UPI00032AA591	AT1G03410.1	2-oxoglutarate (2OG) and Fe(II)-dependent oxygenase superfamily protein	Medtr7g105070.1	desacetoxyvindoline 4-hydroxylase%2C putative
Ca27227	Ca3	47063749	47071930	0.505369	4.0619	7.04937	3.21427e-07	1.80932e-05	6.7083	Peptidyl-prolyl cis-trans isomerase n_2 Tax_Glycine max RepID_K7MZ99_SOYBN	AT3G11530.2	Vacuolar protein sorting 55 (VPS55) family protein	Medtr7g105200.1	vacuolar protein sorting 55 protein
Ca27228	Ca3	47140251	47143525	-0.559149	2.86829	-5.58214	1.05745e-05	0.000176377	3.3432	PREDICTED: uncharacterized protein LOC101495425 n_1 Tax_Cicer arietinum RepID_UPI00032A9AEE	AT3G11590.1	#N/A	Medtr7g105430.1	plant/F24K9-26 protein
Ca27240	Ca3	47242860	47246048	0.415714	8.41661	5.49833	1.29975e-05	0.000204103	2.97849	1-cys peroxiredoxin PER1 n_3 Tax_Papilionoideae RepID_G7ZUV5_MEDTR	AT3G11630.1	Thioredoxin superfamily protein	Medtr7g105830.1	1-cys peroxiredoxin PER1
Ca27267	Ca3	47351123	47356877	-0.877643	6.51995	-9.84575	8.81381e-10	3.27493e-07	12.5554	Digalactosyldiacylglycerol synthase 1 - chloroplastic n_2 Tax_Papilionoideae RepID_DGDG1_LOTJA	AT3G11670.1	UDP-Glycosyltransferase superfamily protein	Medtr7g106250.1	digalactosyldiacylglycerol synthase
Ca27263	Ca3	47455242	47457599	0.424348	7.72657	7.34895	1.62632e-07	1.19272e-05	7.35916	PREDICTED: 33 kDa ribonucleoprotein - chloroplastic n_1 Tax_Cicer arietinum RepID_UPI00032ABE6F	AT3G52380.1	chloroplast RNA-binding protein 33	Medtr7g106440.1	33 kDa ribonucleoprotein
Ca27292	Ca3	47677075	47682777	1.29361	3.03463	6.90742	4.45696e-07	2.22492e-05	6.44808	PREDICTED: probable glutamate carboxypeptidase 2 n_1 Tax_Cicer arietinum RepID_UPI00032A6CF2	AT3G54720.1	Peptidase M28 family protein	Medtr7g107100.8	glutamate carboxypeptidase%2C putative
Ca27335	Ca3	47917547	47921741	0.321561	4.43287	5.89029	4.97931e-06	0.000109581	3.96709	OTU-like cysteine protease n_4 Tax_Papilionoideae RepID_G7KRS0_MEDTR	AT3G62940.1	Cysteine proteinases superfamily protein	Medtr7g108240.1	OTU-like cysteine protease
Ca27384	Ca3	48115783	48120229	0.552312	2.77414	5.14361	3.13098e-05	0.000385375	2.26344	PREDICTED: WD repeat-containing protein 89 homolog n_1 Tax_Cicer arietinum RepID_UPI00032AB088	AT2G47790.1	Transducin/WD40 repeat-like superfamily protein	Medtr7g108870.1	transducin/WD40 repeat protein
Ca27376	Ca3	48134714	48136405	-0.702148	6.03332	-5.87024	5.22786e-06	0.000112461	3.90641	PREDICTED: universal stress protein A-like protein n_1 Tax_Cicer arietinum RepID_UPI00032AD23D	AT2G47710.1	Adenine nucleotide alpha hydrolases-like superfamily protein	Medtr7g108830.1	universal stress family protein
Ca27370	Ca3	48398358	48401718	0.638123	5.3224	4.69762	9.55301e-05	0.000858559	1.02222	DnaJ heat shock amino-terminal domain protein n_3 Tax_Papilionoideae RepID_G7KSS0_MEDTR	AT2G47440.1	Tetratricopeptide repeat (TPR)-like superfamily protein	Medtr7g109360.5	DnaJ heat shock amine-terminal domain protein
Ca27493	Ca3	49180796	49184230	0.425912	2.98759	5.53335	1.1923e-05	0.000192365	3.20857	PREDICTED: 50S ribosomal protein L21 - mitochondrial n_1 Tax_Cicer arietinum RepID_UPI00032ABDE1	#N/A	#N/A	Medtr7g111750.1	50S ribosomal protein L21%2C related protein
Ca27459	Ca3	49282720	49287577	-0.507429	4.36908	-5.25524	2.37194e-05	0.000316539	2.40745	PREDICTED: uncharacterized protein LOC101508207 n_1 Tax_Cicer arietinum RepID_UPI00032AA8FA	AT3G58650.1	PTHR21726:SF29 - F1O19.10 PROTEIN (1 of 4)	Medtr7g112030.1	DUF4378 domain protein
Ca27514	Ca3	49509128	49512681	-0.688363	5.8915	-5.97738	4.03129e-06	9.45684e-05	4.16376	PREDICTED: probable protein phosphatase 2C 34 n_1 Tax_Cicer arietinum RepID_UPI00032A5040	AT5G27930.2	Protein phosphatase 2C family protein	Medtr7g112490.1	protein phosphatase 2C family protein
Ca27541	Ca3	49714037	49715635	-0.703377	3.36291	-7.0869	2.94946e-07	1.70401e-05	6.83822	PREDICTED: uncharacterized protein LOC101499471 n_1 Tax_Cicer arietinum RepID_UPI00032A7FAF	#N/A	#N/A	Medtr7g113110.1	heavy metal transport/detoxification superfamily protein
Ca27537	Ca3	49736910	49742170	0.641932	2.58029	6.1066	2.95113e-06	7.64875e-05	4.63776	PREDICTED: putative protease Do-like 14 isoform X1 n_2 Tax_Cicer arietinum RepID_UPI00032A8F77	AT5G27660.1	Trypsin family protein with PDZ domain	Medtr7g113170.1	trypsin-like serine protease
Ca27531	Ca3	49807469	49812513	-0.639991	4.14138	-5.50891	1.2663e-05	0.000200083	3.05496	PREDICTED: probable linoleate 9S-lipoxygenase 5 n_1 Tax_Cicer arietinum RepID_UPI00032A50FD	AT1G55020.1	lipoxygenase 1	Medtr7g113410.1	linoleate 9S-lipoxygenase-like protein
Ca27528	Ca3	49818506	49821503	0.493853	4.13937	5.46215	1.42107e-05	0.000218665	2.92865	PREDICTED: protein AUXIN RESPONSE 4 n_1 Tax_Cicer arietinum RepID_UPI00032AB6E3	AT1G54990.1	alpha/beta-Hydrolases superfamily protein	Medtr7g113420.2	alpha/beta hydrolase family protein
Ca27569	Ca3	50023406	50027461	-0.535315	4.29246	-4.71975	9.03697e-05	0.000828219	1.10572	PREDICTED: sugar transporter ERD6-like 5 n_1 Tax_Cicer arietinum RepID_UPI000640D7F9	AT1G54730.2	Major facilitator superfamily protein	Medtr7g113960.1	sugar porter (SP) family MFS transporter
Ca27574	Ca3	50163787	50171296	-0.689002	6.18061	-8.6665	9.35747e-09	1.66422e-06	10.212	PREDICTED: acyltransferase-like protein At1g54570 - chloroplastic n_1 Tax_Cicer arietinum RepID_UPI00032A5C0C	AT1G54570.1	Esterase/lipase/thioesterase family protein	Medtr7g114340.1	esterase/lipase/thioesterase-like protein
Ca27581	Ca3	50251676	50257597	-0.390273	7.21076	-5.83409	5.70858e-06	0.000119443	3.81813	PREDICTED: uncharacterized protein LOC101495636 n_1 Tax_Cicer arietinum RepID_UPI00032A4FE1	AT1G54520.1	PF07466 - Protein of unknown function (DUF1517) (DUF1517) (1 of 2)	Medtr7g114660.1	plant/F20D21-34 protein
Ca27614	Ca3	50473760	50476614	0.355568	2.98426	4.82407	6.95717e-05	0.000693405	1.49972	PREDICTED: myosin-binding protein 1 n_1 Tax_Cicer arietinum RepID_UPI00032A5096	AT1G08800.2	Protein of unknown function, DUF593	Medtr7g115350.4	zein-binding protein
Ca27608	Ca3	50563029	50565322	-1.41538	1.32741	-7.32362	1.72196e-07	1.225e-05	7.42217	PREDICTED: peroxygenase 2-like n_1 Tax_Cicer arietinum RepID_UPI00032A759D	AT2G33380.1	Caleosin-related family protein	Medtr7g115490.1	caleosin CLO1-1
Ca27633	Ca3	50598616	50601589	0.728221	3.73563	5.6658	8.61145e-06	0.00015423	3.45798	PREDICTED: uncharacterized protein LOC101512623 n_1 Tax_Cicer arietinum RepID_UPI00032A74DB	AT5G28910.1	#N/A	Medtr7g115570.7	coatomer protein
Ca27637	Ca3	50604204	50607353	0.261477	4.98858	5.6845	8.22593e-06	0.000150317	3.45361	Ankyrin repeat 13B-like protein n_3 Tax_Papilionoideae RepID_A0A072U620_MEDTR	AT3G04470.1	Ankyrin repeat family protein	Medtr7g115580.3	ankyrin repeat 13B-like protein
Ca27635	Ca3	50683225	50684676	0.742731	4.54392	5.52445	1.21874e-05	0.000194376	3.06356	PREDICTED: peptidyl-prolyl cis-trans isomerase CYP19-3-like n_3 Tax_Maleae RepID_UPI0004987608	AT3G56070.2	rotamase cyclophilin 2	Medtr7g116340.1	peptidyl-prolyl cis-trans isomerase
Ca27689	Ca3	50848591	50850742	-0.962362	2.2274	-5.89281	4.94892e-06	0.000109226	4.20093	PREDICTED: probable receptor-like protein kinase At5g18500 isoform X1 n_2 Tax_Cicer arietinum RepID_UPI000640F05C	AT5G48740.1	Leucine-rich repeat protein kinase family protein	Medtr7g116650.1	tyrosine kinase family protein
Ca27701	Ca3	50877509	50881579	0.442374	3.72051	6.86604	4.90488e-07	2.34266e-05	6.2988	Uncharacterized protein n_5 Tax_Papilionoideae RepID_A0A0S3SH36_PHAAN	#N/A	#N/A	Medtr7g116720.1	rRNA-processing protein PIN domain protein
Ca27671	Ca3	50916073	50918265	2.04836	0.701929	4.60477	0.000120602	0.00101075	1.23262	Lanatoside 15-O-acetylesterase n_3 Tax_Papilionoideae RepID_G7L3Z5_MEDTR	AT4G01130.1	GDSL-like Lipase/Acylhydrolase superfamily protein, lipid catabolic process	Medtr7g116870.1	lanatoside 15-O-acetylesterase
Ca27666	Ca3	50923116	50928418	0.75473	4.33793	7.70517	7.34585e-08	6.8509e-06	8.17378	PREDICTED: common plant regulatory factor 1-like n_1 Tax_Cicer arietinum RepID_UPI00032A5CCD	AT2G46270.2	G-box binding factor 3	Medtr7g116890.4	bZIP transcription factor family protein
Ca27704	Ca3	51077153	51078572	0.811531	3.48494	5.90272	4.83117e-06	0.00010756	4.05772	PREDICTED: uncharacterized protein LOC101510355 isoform X1 n_2 Tax_Cicer arietinum RepID_UPI000641451E	AT3G61770.1	Acid phosphatase/vanadium-dependent haloperoxidase-related protein	Medtr7g117385.1	acid phosphatase/vanadium-dependent haloperoxidase
Ca27910	Ca3	51350407	51355021	-0.777136	6.74892	-11.1388	8.04332e-11	1.02519e-07	14.9153	PREDICTED: two-component response regulator-like APRR9 n_1 Tax_Cicer arietinum RepID_UPI00032AB668	AT5G24470.1	pseudo-response regulator 5	Medtr7g118260.4	PRR response regulator
Ca27911	Ca3	51359285	51360473	-0.393018	10.0487	-6.39324	1.48718e-06	4.75865e-05	5.08536	PREDICTED: protein CURVATURE THYLAKOID 1B - chloroplastic-like n_1 Tax_Cicer arietinum RepID_UPI00032A6701	#N/A	#N/A	#N/A
Ca27721	Ca3	51388209	51396686	-0.843145	7.13215	-6.07606	3.17641e-06	8.00382e-05	4.40295	LATE ELONGATED HYPOCOTYL n_3 Tax_Cicer arietinum RepID_A0A023NE28_CICAR	AT1G01060.4	Homeodomain-like superfamily protein	Medtr7g118330.2	late elongated hypocotyl-like protein
Ca27723	Ca3	51397471	51400333	-1.14539	0.558143	-6.48781	1.18869e-06	4.09484e-05	5.44838	Inorganic pyrophosphatase n_1 Tax_Medicago truncatula RepID_Q2HTA8_MEDTR	AT1G01050.1	pyrophosphorylase 1	Medtr7g118340.1	soluble inorganic pyrophosphatase
Ca27718	Ca3	51437308	51438787	2.15694	1.384	5.6254	9.50842e-06	0.000164701	3.58323	PREDICTED: RNA-binding protein 24-like isoform X1 n_2 Tax_Cicer arietinum RepID_UPI00032AB2E6	AT1G76460.1	RNA-binding (RRM/RBD/RNP motifs) family protein	Medtr7g117495.1	RNA-binding (RRM/RBD/RNP motif) family protein
Ca27747	Ca3	51984225	51987764	-0.958841	0.707416	-5.66715	8.58309e-06	0.000154148	3.65527	PREDICTED: cysteine-rich repeat secretory protein 15 n_1 Tax_Cicer arietinum RepID_UPI00032ACBC1	AT3G60720.1	plasmodesmata-located protein 8	Medtr5g078030.1	salt stress response/antifungal domain protein
Ca27798	Ca3	52680221	52693634	1.25984	2.51602	7.25425	2.01459e-07	1.34555e-05	7.23697	PREDICTED: DNA-directed RNA polymerase 2 - chloroplastic/mitochondrial isoform X1 n_2 Tax_Cicer arietinum RepID_UPI00032A4E15	AT5G15700.2	DNA/RNA polymerases superfamily protein	Medtr7g017440.1	leguminosin group485 secreted peptide
Ca27907	Ca3	53657440	53661427	-0.413208	6.24648	-4.87569	6.11337e-05	0.000636082	1.46686	PREDICTED: peptidyl-prolyl cis-trans isomerase FKBP19 - chloroplastic n_1 Tax_Cicer arietinum RepID_UPI00032A9489	AT5G13410.1	FKBP-like peptidyl-prolyl cis-trans isomerase family protein	Medtr7g006570.1	FKBP-type peptidyl-prolyl cis-trans isomerase
Ca27894	Ca3	53763413	53765789	0.829516	2.64197	5.55933	1.11847e-05	0.000183551	3.28089	PREDICTED: uncharacterized protein At2g39795 - mitochondrial n_1 Tax_Cicer arietinum RepID_UPI00032AC5EB	AT5G02050.1	Mitochondrial glycoprotein family protein	Medtr7g063520.1	glycoprotein family protein
Ca27897	Ca3	53776271	53788554	0.572898	5.94605	5.23248	2.50995e-05	0.000329808	2.34683	Delta-1-pyrroline-5-carboxylate synthetase 2 n_4 Tax_Papilionoideae RepID_H0UST0_MEDTR	AT4G23160.1	cysteine-rich RLK (RECEPTOR-like protein kinase) 8	Medtr6g472230.1	disease resistance protein (TIR-NBS-LRR class)%2C putative
Ca27935	Ca3	54458444	54464430	1.60935	1.77065	7.08178	2.98422e-07	1.71592e-05	6.89663	Carboxypeptidase n_2 Tax_Papilionoideae RepID_G7KSX5_MEDTR	AT1G28110.2	serine carboxypeptidase-like 45	Medtr7g021130.1	serine carboxypeptidase-like protein
Ca27966	Ca3	54792014	54800190	-0.631635	2.97923	-8.06449	3.35195e-08	4.10144e-06	9.00745	Eukaryotic aspartyl protease family protein n_2 Tax_Papilionoideae RepID_G7KTS2_MEDTR	AT1G05840.1	Eukaryotic aspartyl protease family protein	Medtr7g021510.1	eukaryotic aspartyl protease family protein
Ca28033	Ca3	55714235	55719700	-0.441535	5.53038	-5.92236	4.60628e-06	0.000104375	4.02924	Uncharacterized protein n_19 Tax_fabids RepID_I1N523_SOYBN	AT2G39450.1	Cation efflux family protein	Medtr7g022890.2	cation diffusion facilitator family transporter
Ca28137	Ca3	57210181	57211749	0.587478	8.49406	4.69688	9.57059e-05	0.000858559	1.00386	Heat shock protein n_4 Tax_Spermatophyta RepID_A0A076KXD2_CICAR	AT3G12580.1	heat shock protein 70	Medtr7g024580.1	heat shock cognate 70 kDa protein
Ca28136	Ca3	57216046	57219663	0.629965	9.11516	5.18311	2.83775e-05	0.000361695	2.18859	Heat shock protein n_4 Tax_Spermatophyta RepID_A0A076KXD2_CICAR	AT3G12580.1	heat shock protein 70	Medtr7g024580.1	heat shock cognate 70 kDa protein
Ca28229	Ca3	58636474	58641122	-1.11053	2.30299	-5.44692	1.47553e-05	0.000225232	3.15908	PREDICTED: auxin response factor 9-like n_1 Tax_Cicer arietinum RepID_UPI000640CA95	AT4G23980.2	auxin response factor 9	Medtr7g062540.1	auxin response factor 2
Ca28209	Ca3	58763603	58766639	0.743173	0.694715	4.52964	0.000145644	0.00115962	1.04407	PREDICTED: CRS2-associated factor 2 - mitochondrial n_1 Tax_Cicer arietinum RepID_UPI00032A6114	AT5G54890.1	RNA-binding CRS1 / YhbY (CRM) domain-containing protein	Medtr0194s0020.1	CRS2-associated factor 1
Ca28334	Ca3	59841628	59845611	-0.564113	5.41481	-6.04084	3.45804e-06	8.50333e-05	4.31524	PREDICTED: acetylornithine aminotransferase - mitochondrial n_1 Tax_Cicer arietinum RepID_UPI00032A9C23	AT1G80600.1	HOPW1-1-interacting 1	Medtr7g451450.1	acetylornithine aminotransferase
Ca28354	Ca3	60040172	60063101	-0.723171	9.91583	-5.9334	4.48463e-06	0.000102992	3.98911	PREDICTED: pectinesterase-like n_1 Tax_Cicer arietinum RepID_UPI00032A6E08	AT1G11580.1	methylesterase PCR A	Medtr7g050870.1	pectinesterase/pectinesterase inhibitor
Ca28313	Ca3	60114843	60123771	-0.848641	3.57403	-5.83267	5.7284e-06	0.000119622	3.878	PREDICTED: ABC transporter B family member 15-like n_1 Tax_Cicer arietinum RepID_UPI00032A7012	AT3G28345.1	ABC transporter family protein	Medtr7g051100.1	ABC transporter B family protein
Ca28433	Ca3	60298014	60298806	0.360481	4.12481	5.71923	7.55546e-06	0.000142492	3.56933	PREDICTED: LOW QUALITY PROTEIN: eukaryotic translation initiation factor 4G-like n_1 Tax_Cicer arietinum RepID_UPI0006410FC8	AT3G60240.3	eukaryotic translation initiation factor 4G	Medtr8g008680.2	eukaryotic translation initiation factor 4G-like protein
Ca28650	Ca3	60695102	60697962	1.33406	4.63352	10.5007	2.55768e-10	1.58267e-07	13.7777	PREDICTED: probable sodium/metabolite cotransporter BASS3 - chloroplastic n_1 Tax_Cicer arietinum RepID_UPI00032A9094	AT3G25410.1	Sodium Bile acid symporter family	Medtr7g053090.1	Na+-bile acid cotransporter
Ca28349	Ca3	60859037	60862511	-0.452782	4.18875	-4.68863	9.77094e-05	0.000869151	1.02632	PREDICTED: uncharacterized protein LOC101502310 isoform X2 n_1 Tax_Cicer arietinum RepID_UPI00032AA1E8	#N/A	#N/A	#N/A
Ca28389	Ca3	61048010	61050995	0.618538	3.56796	6.69839	7.24596e-07	2.97922e-05	5.92378	PREDICTED: transcription factor bHLH62 isoform X1 n_2 Tax_Cicer arietinum RepID_UPI00032A6E85	AT3G07340.1	basic helix-loop-helix (bHLH) DNA-binding superfamily protein	Medtr7g053410.1	BHLH transcription factor
Ca28376	Ca3	61124285	61126734	0.460866	6.36984	4.76448	8.07799e-05	0.000768364	1.19057	40S ribosomal protein S8 n_3 Tax_Poaceae RepID_C5YDP0_SORBI	AT5G59240.1	Ribosomal protein S8e family protein	Medtr7g053450.1	40S ribosomal S8-like protein
Ca28373	Ca3	61171734	61174058	1.08916	0.741232	5.41534	1.59527e-05	0.000238278	3.08875	Glucan endo-1 -3-beta-glucosidase-like protein n_3 Tax_Papilionoideae RepID_A0A072TYH8_MEDTR	AT3G07320.1	O-Glycosyl hydrolases family 17 protein	Medtr7g053500.1	glucan endo-1%2C3-beta-glucosidase-like protein
Ca28411	Ca3	61729865	61731097	-0.55121	4.52179	-7.05463	3.17578e-07	1.79902e-05	6.70625	PREDICTED: F-box/kelch-repeat protein At3g24760 n_1 Tax_Cicer arietinum RepID_UPI00032AB850	AT3G24760.1	Galactose oxidase/kelch repeat superfamily protein	Medtr0197s0070.2	F-box/kelch-repeat plant protein
Ca28437	Ca3	61894377	61896014	-0.462353	3.33484	-5.70227	7.87565e-06	0.000146721	3.58932	PREDICTED: pentatricopeptide repeat-containing protein At5g16420 - mitochondrial n_1 Tax_Cicer arietinum RepID_UPI00032A914F	AT5G16420.1	Pentatricopeptide repeat (PPR-like) superfamily protein	Medtr7g060720.1	PPR containing plant-like protein%2C putative
Ca28468	Ca3	62764826	62767501	-0.577201	10.2742	-7.1585	2.50447e-07	1.5635e-05	6.86856	Fructose-1 -6-bisphosphatase - chloroplastic n_16 Tax_Papilionoideae RepID_F16P1_PEA	AT3G54050.2	high cyclic electron flow 1	Medtr7g066120.1	fructose-1%2C6-bisphosphatase
Ca28497	Ca3	63164454	63164840	-0.441175	4.59444	-5.70812	7.76368e-06	0.000145166	3.51836	PREDICTED: RNA polymerase sigma factor sigA-like n_1 Tax_Cicer arietinum RepID_UPI000640FA05	#N/A	#N/A	Medtr0172s0030.1	RNA polymerase sigma factor
Ca28573	Ca3	64880532	64893633	-0.802054	6.02888	-7.3713	1.54642e-07	1.16071e-05	7.41676	PREDICTED: yrdC domain-containing protein - mitochondrial n_1 Tax_Cicer arietinum RepID_UPI00032A6117	AT3G01920.1	DHBP synthase RibB-like alpha/beta domain	Medtr6g045307.1	IPP transferase
Ca28590	Ca3	65577724	65583622	-0.431445	4.96141	-4.72966	8.81513e-05	0.00081437	1.10316	PREDICTED: uncharacterized protein LOC101491530 n_1 Tax_Cicer arietinum RepID_UPI00032A7871	AT3G01810.2	#N/A	Medtr1g075790.1	hypothetical protein
Ca10531	Ca4	233371	239594	-0.480768	2.80328	-5.28644	2.19521e-05	0.000298983	2.65305	PREDICTED: 125 kDa kinesin-related protein n_1 Tax_Cicer arietinum RepID_UPI00032A9F81	AT2G37420.1	ATP binding microtubule motor family protein	Medtr1g067630.1	125 kDa kinesin-like protein
Ca10547	Ca4	340724	345340	0.29886	3.10843	4.80235	7.34632e-05	0.000721193	1.40777	Uncharacterized protein n_1 Tax_Medicago truncatula RepID_G7IBM1_MEDTR	#N/A	#N/A	Medtr1g068580.1	hypothetical protein
Ca10575	Ca4	584750	588299	-0.937242	3.95576	-6.42021	1.395e-06	4.56885e-05	5.27303	PREDICTED: uncharacterized protein LOC105851045 n_1 Tax_Cicer arietinum RepID_UPI00032AD1A6	AT4G28760.2	Protein of unknown function (DUF3741)	Medtr1g069190.1	DUF3741 family protein
Ca10627	Ca4	1127491	1129647	-0.518729	4.34432	-5.15103	3.07362e-05	0.00038004	2.18425	PREDICTED: patellin-4-like n_1 Tax_Cicer arietinum RepID_UPI00032AABA4	AT1G30690.2	Sec14p-like phosphatidylinositol transfer family protein	Medtr1g069915.1	CRAL/TRIO%2C amine-terminal domain protein
Ca10631	Ca4	1184794	1187058	0.918805	1.31505	4.98609	4.63821e-05	0.000514068	2.05467	PREDICTED: uncharacterized protein LOC101503717 n_1 Tax_Cicer arietinum RepID_UPI00032A63E0	AT2G31240.1	Tetratricopeptide repeat (TPR)-like superfamily protein	Medtr1g070145.1	kinesin light chain%2C putative
Ca10647	Ca4	1229831	1231625	0.783299	5.48533	7.06102	3.12961e-07	1.77946e-05	6.71301	PREDICTED: 1-aminocyclopropane-1-carboxylate oxidase homolog 1-like n_1 Tax_Cicer arietinum RepID_UPI00032A8524	AT5G59540.2	2-oxoglutarate (2OG) and Fe(II)-dependent oxygenase superfamily protein	Medtr1g070185.1	desacetoxyvindoline 4-hydroxylase%2C putative
Ca10643	Ca4	1237041	1240946	0.488398	4.17549	5.27668	2.24898e-05	0.000304679	2.46886	Alpha/beta-hydrolase superfamily protein n_2 Tax_Papilionoideae RepID_A0A072VLR1_MEDTR	AT2G42450.1	alpha/beta-Hydrolases superfamily protein	Medtr1g070195.1	alpha/beta-hydrolase superfamily protein
Ca10658	Ca4	1366419	1372650	0.316239	4.87058	5.2954	2.14693e-05	0.000294769	2.50328	PREDICTED: flowering locus K homology domain-like n_1 Tax_Cicer arietinum RepID_UPI00032AAAC2	AT3G04610.1	RNA-binding KH domain-containing protein	Medtr1g070380.1	poly(rC)-binding-like protein
Ca10668	Ca4	1395101	1396219	-0.995115	5.08386	-5.07884	3.67949e-05	0.000433908	1.96986	PREDICTED: histone H1 n_1 Tax_Cicer arietinum RepID_UPI00032A5A2A	AT1G06760.1	winged-helix DNA-binding transcription factor family protein	Medtr1g070440.1	linker histone H1 and h5 family protein
Ca10694	Ca4	1691629	1697706	0.597739	2.79626	5.55377	1.13386e-05	0.000185281	3.34704	PREDICTED: heat stress transcription factor A-6b-like n_1 Tax_Cicer arietinum RepID_UPI00032AA927	AT3G22830.1	heat shock transcription factor A6B	Medtr1g071360.2	heat shock transcription factor A3
Ca10691	Ca4	1782176	1787411	-0.842802	7.49046	-6.4115	1.42412e-06	4.61483e-05	5.20275	PREDICTED: sulfate transporter 3.1 n_1 Tax_Cicer arietinum RepID_UPI00032AC110	AT3G51895.1	sulfate transporter 3;1	Medtr1g071530.1	sulfate/bicarbonate/oxalate exchanger and transporter sat-1
Ca10700	Ca4	1840408	1843359	-1.10923	1.11389	-5.45721	1.43853e-05	0.000220685	3.20401	Type I inositol-1 -4 -5-trisphosphate 5-phosphatase n_2 Tax_Papilionoideae RepID_G7IDM2_MEDTR	AT3G63240.1	DNAse I-like superfamily protein	Medtr1g071680.1	type I inositol-1%2C4%2C5-trisphosphate 5-phosphatase
Ca10704	Ca4	1881850	1882440	-0.503447	3.83273	-4.71197	9.21498e-05	0.000838947	1.12929	PREDICTED: uncharacterized protein LOC101501474 n_1 Tax_Cicer arietinum RepID_UPI00032A5F57	AT4G02715.1	PF15365 - Proline-rich nuclear receptor coactivator (PNRC) (1 of 2)	Medtr1g071810.1	hypothetical protein
Ca10703	Ca4	1882805	1885344	-0.465803	4.85808	-5.32262	2.00682e-05	0.000280313	2.57223	PREDICTED: uncharacterized protein LOC101501474 n_1 Tax_Cicer arietinum RepID_UPI00032A5F57	AT4G02715.1	PF15365 - Proline-rich nuclear receptor coactivator (PNRC) (1 of 2)	Medtr1g071810.1	hypothetical protein
Ca10705	Ca4	1885709	1886742	-0.567704	4.08235	-5.34868	1.88132e-05	0.000268171	2.6787	No Hits	#N/A	#N/A	#N/A
Ca10724	Ca4	2025895	2032357	-0.486709	6.49151	-6.49258	1.17539e-06	4.0858e-05	5.39544	PREDICTED: uncharacterized protein LOC101505859 isoform X1 n_1 Tax_Cicer arietinum RepID_UPI00032A83C2	AT1G03160.2	FZO-like	Medtr1g072270.1	FZO-like protein
Ca10739	Ca4	2111941	2114205	-0.481999	3.99307	-4.84922	6.5323e-05	0.000668305	1.44858	PREDICTED: phenazine biosynthesis-like domain-containing protein 1 n_1 Tax_Cicer arietinum RepID_UPI00032A9736	AT4G02860.1	Phenazine biosynthesis PhzC/PhzF protein	Medtr1g072490.1	phenazine biosynthesis PhzC/PhzF family protein
Ca10738	Ca4	2179568	2183028	1.76922	1.24336	4.56997	0.000131615	0.00107535	1.06776	PREDICTED: protein PALE CRESS - chloroplastic n_1 Tax_Cicer arietinum RepID_UPI00032AA324	AT2G48120.2	pale cress protein (PAC)	Medtr1g072640.2	PALE CRESS protein (PAC)
Ca10750	Ca4	2187642	2191020	-0.403062	5.36204	-4.89729	5.79155e-05	0.000611753	1.51475	PREDICTED: BTB/POZ and MATH domain-containing protein 2-like isoform X2 n_1 Tax_Cicer arietinum RepID_UPI00032A62D3	AT3G06190.2	BTB-POZ and MATH domain 2	Medtr1g072650.1	BTB/POZ/MATH-domain protein
Ca10776	Ca4	2514238	2517791	0.400889	5.87891	5.09786	3.50904e-05	0.000418975	2.01377	Uncharacterized protein n_10 Tax_Phaseoleae RepID_A0A0S3SPK5_PHAAN	AT4G14300.1	RNA-binding (RRM/RBD/RNP motifs) family protein	Medtr1g073690.2	RNA-binding (RRM/RBD/RNP motif) family protein
Ca10791	Ca4	2633778	2637731	-0.500586	2.97211	-4.63202	0.000112626	0.000959803	1.06758	PREDICTED: LOW QUALITY PROTEIN: CASP-like protein 5B3 n_1 Tax_Cicer arietinum RepID_UPI00032A7F36	#N/A	#N/A	Medtr1g073950.1	CASP-like protein
Ca10794	Ca4	2652704	2655984	-0.485972	5.88385	-4.89547	5.81803e-05	0.000613702	1.51297	Uncharacterized protein n_9 Tax_Papilionoideae RepID_I1NI24_SOYBN	AT5G43430.2	electron transfer flavoprotein beta	Medtr1g074170.1	electron transfer flavoprotein subunit beta
Ca10808	Ca4	2843843	2844336	-1.12774	1.32993	-4.97736	4.74056e-05	0.000523137	2.08667	PREDICTED: uncharacterized protein LOC101494774 isoform X1 n_2 Tax_Cicer arietinum RepID_UPI00032A7D59	#N/A	#N/A	Medtr1g475250.3	P-loop nucleoside triphosphate hydrolase superfamily protein
Ca10852	Ca4	3192438	3198681	-0.496679	7.06574	-5.31813	2.02926e-05	0.000281903	2.5562	PREDICTED: cryptochrome-1-like n_1 Tax_Cicer arietinum RepID_UPI00032AB630	AT1G04400.2	cryptochrome 2	Medtr1g076190.2	cryptochrome 2B apoprotein
Ca10877	Ca4	3393192	3402835	0.686499	5.11067	5.28842	2.18446e-05	0.000298049	2.48385	Pyruvate kinase n_2 Tax_Papilionoideae RepID_A0A072VLB0_MEDTR	AT3G22960.1	Pyruvate kinase family protein	Medtr1g076540.1	pyruvate kinase family protein
Ca10924	Ca4	3945825	3946864	-0.81765	0.942619	-5.81913	5.92048e-06	0.000121549	4.04324	PREDICTED: mavicyanin n_1 Tax_Cicer arietinum RepID_UPI00032A52C3	AT1G64640.1	early nodulin-like protein 8	Medtr1g077790.1	plastocyanin-like domain protein
Ca10937	Ca4	4137812	4140180	-1.82671	0.70084	-9.41084	2.06337e-09	5.73805e-07	11.3079	PREDICTED: heavy metal-associated isoprenylated plant protein 26-like n_1 Tax_Cicer arietinum RepID_UPI00032A9C52	AT2G18196.1	Heavy metal transport/detoxification superfamily protein	Medtr1g078090.1	heavy metal transport/detoxification superfamily protein
Ca10951	Ca4	4268133	4285056	-0.455899	5.53609	-7.25859	1.99488e-07	1.33823e-05	7.16114	PREDICTED: putative F-box protein PP2-B12 n_1 Tax_Cicer arietinum RepID_UPI00032ACF4B	AT2G02360.1	phloem protein 2-B10	Medtr1g079140.1	F-box protein
Ca11003	Ca4	4759053	4760535	-2.00864	2.3677	-6.57707	9.63075e-07	3.54945e-05	5.76837	PREDICTED: uncharacterized protein At2g34160-like n_1 Tax_Cicer arietinum RepID_UPI00032A9AC5	#N/A	#N/A	#N/A
Ca11013	Ca4	4845116	4846363	0.318704	5.75191	5.56642	1.09912e-05	0.000181153	3.1652	PREDICTED: sec-independent protein translocase protein TATA - chloroplastic-like n_1 Tax_Cicer arietinum RepID_UPI00032A947A	AT5G28750.1	Bacterial sec-independent translocation protein mttA/Hcf106	Medtr1g080910.1	twin arginine translocase
Ca11011	Ca4	4860142	4863753	-0.401078	9.82111	-5.73735	7.22818e-06	0.000139812	3.50515	GDP-D-mannose-3 -5-epimerase n_3 Tax_Medicago truncatula RepID_A0A072VNM9_MEDTR	AT5G28840.2	GDP-D-mannose 3',5'-epimerase	Medtr1g080950.2	GDP-D-mannose-3%2C5-epimerase
Ca11030	Ca4	4908450	4911594	0.870348	2.98722	5.70729	7.77941e-06	0.000145282	3.64144	PREDICTED: trihelix transcription factor GTL2-like n_1 Tax_Cicer arietinum RepID_UPI00032A76DD	AT5G28300.1	Duplicated homeodomain-like superfamily protein	Medtr1g081180.1	trihelix transcription factor
Ca11025	Ca4	4973360	4975799	0.445001	4.51241	5.26234	2.33051e-05	0.000312403	2.4244	PREDICTED: 40S ribosomal protein S24-1-like n_1 Tax_Cicer arietinum RepID_UPI0006414FDF	AT5G28060.1	Ribosomal protein S24e family protein	Medtr1g081410.1	40S ribosomal protein S24-2
Ca11046	Ca4	5157571	5163976	0.272678	6.39801	4.75303	8.3133e-05	0.000783438	1.1628	Sodium/hydrogen exchanger n_11 Tax_Phaseoleae RepID_G3MDF0_VIGRA	AT3G05030.2	sodium hydrogen exchanger 2	Medtr1g081900.2	Na+/H+ exchanger 1
Ca11064	Ca4	5211691	5213757	-0.553303	4.99774	-5.92826	4.54079e-06	0.000103413	4.06325	PREDICTED: myosin-10 isoform X1 n_1 Tax_Cicer arietinum RepID_UPI00032A5931	#N/A	#N/A	Medtr1g082215.1	viral A-type inclusion protein%2C putative
Ca11068	Ca4	5259557	5264082	0.523655	3.62557	4.77559	7.85607e-05	0.00075619	1.25339	PREDICTED: uncharacterized protein LOC101510461 isoform X1 n_2 Tax_Cicer arietinum RepID_UPI00032A9E03	#N/A	#N/A	Medtr1g082380.2	protein translocase family protein
Ca11077	Ca4	5360008	5362725	1.47425	1.4382	4.58069	0.00012812	0.00105663	1.10909	PREDICTED: serine/threonine-protein kinase CDL1 n_1 Tax_Cicer arietinum RepID_UPI00032A93CC	AT1G54820.1	Protein kinase superfamily protein	Medtr1g082580.1	Serine/Threonine kinase family protein
Ca11072	Ca4	5378284	5380836	0.851279	4.25935	5.35887	1.83445e-05	0.000263207	2.67475	PREDICTED: uncharacterized protein DDB_G0283357 n_1 Tax_Cicer arietinum RepID_UPI00032AAF1F	#N/A	#N/A	Medtr1g082650.1	heavy-metal-associated domain protein
Ca11080	Ca4	5390251	5392267	0.329068	5.59649	6.75837	6.29934e-07	2.73717e-05	6.01499	Nuclear transcription factor Y protein n_2 Tax_Papilionoideae RepID_B7FI76_MEDTR	AT1G08970.4	nuclear factor Y, subunit C9	Medtr1g082660.1	nuclear transcription factor Y protein
Ca11115	Ca4	5676978	5681205	0.784927	2.75289	5.44448	1.48444e-05	0.000226141	3.04249	PREDICTED: serine/arginine-rich splicing factor SR30-like n_1 Tax_Cicer arietinum RepID_UPI00032AB4F1	#N/A	#N/A	#N/A
Ca11145	Ca4	5954497	5956603	-0.402443	2.94764	-5.82818	5.7913e-06	0.00012035	3.95577	PREDICTED: uncharacterized protein LOC101510246 n_1 Tax_Cicer arietinum RepID_UPI00032AA9AC	AT1G56423.1	#N/A	Medtr1g084040.1	hypothetical protein
Ca11168	Ca4	6018319	6023789	-0.631596	7.08808	-8.99807	4.72965e-09	1.06382e-06	10.8893	PREDICTED: solute carrier family 40 member 3 - chloroplastic n_1 Tax_Cicer arietinum RepID_UPI00032A50BA	AT5G26820.1	iron-regulated protein 3	Medtr1g084140.2	solute carrier family 40 protein
Ca11164	Ca4	6067824	6076431	0.373315	3.27208	4.82443	6.95089e-05	0.000693405	1.4223	Uncharacterized protein n_2 Tax_Papilionoideae RepID_A0A072VM73_MEDTR	AT1G09300.2	Metallopeptidase M24 family protein	Medtr1g084190.1	Xaa-pro aminopeptidase
Ca11162	Ca4	6083893	6084567	-0.501987	6.87157	-5.59728	1.01882e-05	0.000173143	3.24425	PREDICTED: uncharacterized protein LOC101504472 n_1 Tax_Cicer arietinum RepID_UPI0006412B54	AT1G09310.1	Protein of unknown function, DUF538	Medtr7g111900.1	plant/F25P12-18 protein
Ca11181	Ca4	6132028	6135645	-0.41081	3.33888	-6.64268	8.2554e-07	3.19012e-05	5.82582	PREDICTED: zinc finger CCCH domain-containing protein 3 n_1 Tax_Cicer arietinum RepID_UPI00032ACD61	AT5G26749.2	C2H2 and C2HC zinc fingers superfamily protein	Medtr1g084750.1	U1 zinc finger protein
Ca11185	Ca4	6285068	6288809	-0.728762	3.10953	-4.92012	5.46995e-05	0.000584238	1.7932	PREDICTED: transcription factor PIF3 isoform X1 n_2 Tax_Cicer arietinum RepID_UPI00032A5A77	#N/A	#N/A	Medtr1g084980.1	phytochrome-interacting factor 3.1
Ca11229	Ca4	6603120	6614794	-0.469295	7.99793	-5.8108	6.04179e-06	0.000123377	3.75067	Protein translocase subunit SecA - chloroplastic n_3 Tax_Papilionoideae RepID_SECA_PEA	AT4G01800.1	Albino or Glassy Yellow 1	Medtr1g086050.1	preprotein translocase subunit SecA
Ca11227	Ca4	6655509	6656242	-1.05051	4.13476	-5.28732	2.19043e-05	0.000298597	2.51967	PREDICTED: protein RADIALIS-like 3 n_1 Tax_Cicer arietinum RepID_UPI00032A9F08	#N/A	#N/A	Medtr1g086180.1	MYB family transcription factor
Ca11236	Ca4	6689569	6697440	0.443391	7.26131	7.87457	5.06373e-08	5.29055e-06	8.52884	PREDICTED: squamosa promoter-binding-like protein 1 n_1 Tax_Cicer arietinum RepID_UPI00032A5A47	AT2G47070.1	squamosa promoter binding protein-like 1	Medtr1g086250.2	squamosa promoter-binding-like protein
Ca11239	Ca4	6711235	6718391	-0.76976	5.88621	-5.12877	3.24884e-05	0.000396893	2.09147	Protein phosphatase 2C-like protein n_1 Tax_Medicago truncatula RepID_G7IBT7_MEDTR	AT3G62260.1	Protein phosphatase 2C family protein	Medtr1g086350.2	protein phosphatase 2C-like protein
Ca11261	Ca4	6909908	6916719	-0.441972	3.14405	-6.83006	5.33174e-07	2.44892e-05	6.25554	PREDICTED: uncharacterized protein LOC101499866 n_1 Tax_Cicer arietinum RepID_UPI00032A96AE	AT3G62370.1	heme binding	Medtr1g086810.1	heme-binding protein
Ca11271	Ca4	6918069	6919987	1.21996	2.91247	7.14017	2.61142e-07	1.59767e-05	6.94808	PREDICTED: pentatricopeptide repeat-containing protein At1g02370 - mitochondrial-like n_1 Tax_Cicer arietinum RepID_UPI00032A5146	AT1G02370.1	Tetratricopeptide repeat (TPR)-like superfamily protein	Medtr1g086820.1	PPR containing plant protein
Ca11259	Ca4	6920206	6922672	-1.07524	4.57309	-9.25352	2.82329e-09	7.07906e-07	11.4051	PREDICTED: beta-carotene isomerase D27 - chloroplastic isoform X1 n_2 Tax_Cicer arietinum RepID_UPI000641073B	AT4G01995.1	PF13225 - Domain of unknown function (DUF4033) (DUF4033) (1 of 3)	Medtr1g086840.1	D27 family protein%2C putative
Ca11285	Ca4	7105683	7108605	0.477233	4.00742	5.93203	4.49955e-06	0.000103179	4.08691	Late embryogenesis abundant protein (LEA) family protein n_2 Tax_Medicago truncatula RepID_G7IDS7_MEDTR	AT3G62580.1	Late embryogenesis abundant protein (LEA) family protein	Medtr1g087320.1	late embryogenesis abundant protein (LEA) family protein
Ca11286	Ca4	7138881	7145407	1.48061	3.41327	6.84338	5.16954e-07	2.41062e-05	6.24984	MYB transcription factor MYB112 n_1 Tax_Medicago truncatula RepID_D5FFI0_MEDTR	AT5G49330.1	myb domain protein 111	Medtr1g087540.1	myb transcription factor%2C putative
Ca11283	Ca4	7150235	7155016	0.410603	6.16029	5.20607	2.68026e-05	0.000345907	2.28261	Protein disufide isomerase-like protein n_15 Tax_Papilionoideae RepID_I1L7R5_SOYBN	AT2G47470.2	thioredoxin family protein	Medtr1g087520.1	protein disulfide isomerase-like protein
Ca11296	Ca4	7207854	7213348	-0.567681	4.01465	-8.23034	2.34719e-08	3.26365e-06	9.31658	PREDICTED: uncharacterized protein LOC101511423 n_1 Tax_Cicer arietinum RepID_UPI00032AD3FC	AT1G29220.1	transcriptional regulator family protein	Medtr1g087790.2	transcriptional regulator family protein%2C putative
Ca11313	Ca4	7288948	7291001	0.522975	6.44551	5.40071	1.65401e-05	0.000245852	2.76175	Ribosomal protein L19 n_9 Tax_rosids RepID_I3SA92_MEDTR	AT4G02230.1	Ribosomal protein L19e family protein	Medtr7g108955.2	60S ribosomal protein L19
Ca11316	Ca4	7300146	7301300	3.28346	0.275442	5.37348	1.76927e-05	0.000257234	2.97245	PREDICTED: ethylene-responsive transcription factor ERF113-like n_2 Tax_Cicer arietinum RepID_UPI00032A624C	AT2G47520.1	Integrase-type DNA-binding superfamily protein,cellular response to hypoxia, ethylene-activated signaling pathway	Medtr1g087920.1	ethylene response factor
Ca11319	Ca4	7454862	7464398	-0.566149	2.25936	-4.87972	6.05202e-05	0.000631417	1.71945	PREDICTED: poly [ADP-ribose] polymerase 2 n_1 Tax_Cicer arietinum RepID_UPI00032AC3FF	AT4G02390.1	poly(ADP-ribose) polymerase	Medtr1g088375.1	poly(ADP-ribose) polymerase domain protein
Ca11339	Ca4	7550614	7560119	0.734936	1.52847	4.70346	9.41404e-05	0.000852137	1.43104	PREDICTED: zinc finger CCCH domain-containing protein 31 n_1 Tax_Cicer arietinum RepID_UPI00032A68E4	AT2G47680.1	zinc finger (CCCH type) helicase family protein	Medtr1g088590.1	zinc finger CCCH domain protein
Ca11337	Ca4	7581445	7582470	0.549765	3.34663	5.24607	2.42663e-05	0.000321437	2.44878	PREDICTED: uncharacterized protein LOC101493731 n_1 Tax_Cicer arietinum RepID_UPI00032A8A10	AT1G02870.1	K14839 - nucleolar protein 16 (NOP16) (1 of 1)	Medtr1g088670.1	ribosome biogenesis protein Nop16
Ca11350	Ca4	7590523	7598281	0.89709	8.69509	5.18407	2.83096e-05	0.000361131	2.19356	PREDICTED: ABC transporter C family member 4-like n_1 Tax_Cicer arietinum RepID_UPI00032A559C	AT2G47800.1	multidrug resistance-associated protein 4	Medtr1g088680.1	multidrug resistance protein ABC transporter family protein
Ca11346	Ca4	7606558	7609421	0.590342	4.3134	6.21344	2.28344e-06	6.37342e-05	4.75399	PREDICTED: uncharacterized protein OsI_027940-like n_1 Tax_Cicer arietinum RepID_UPI00032A67A3	AT4G02450.2	HSP20-like chaperones superfamily protein	Medtr1g088700.1	CS domain protein
Ca11360	Ca4	7784286	7787738	-0.462422	5.73223	-6.08802	3.08619e-06	7.88679e-05	4.4289	PREDICTED: tubby-like F-box protein 3 n_1 Tax_Cicer arietinum RepID_UPI00032A5A22	AT2G47900.3	tubby like protein 3	Medtr1g088960.2	tubby-F-box-like protein
Ca11371	Ca4	7853505	7855082	1.35933	2.06103	5.52611	1.21375e-05	0.000193781	3.26877	PREDICTED: protein SLOW WALKER 1 n_1 Tax_Cicer arietinum RepID_UPI00032A5723	AT2G47990.1	transducin family protein / WD-40 repeat family protein	Medtr1g089260.1	U3 small nucleolar RNA-associated protein%2C putative
Ca11380	Ca4	7889340	7891885	1.24495	3.87889	5.04207	4.03299e-05	0.000463445	1.95584	Gibberellin receptor n_7 Tax_Papilionoideae RepID_E3VJP7_9FABA	AT3G63010.1	alpha/beta-Hydrolases superfamily protein	Medtr1g089310.1	gibberellin receptor GID1c-like protein
Ca11411	Ca4	8115049	8127026	1.25369	4.55242	5.76581	6.74269e-06	0.000133242	3.66071	GroEL-like chaperone - ATPase n_2 Tax_Papilionoideae RepID_Q1RSH4_MEDTR	AT3G23990.1	heat shock protein 60	Medtr1g090140.1	TCP-1/cpn60 chaperonin family protein
Ca11432	Ca4	8311024	8318521	-0.291915	5.39569	-4.94657	5.11976e-05	0.000553405	1.63744	Uncharacterized protein n_12 Tax_Papilionoideae RepID_I1NHT9_SOYBN	AT5G03540.2	exocyst subunit exo70 family protein A1	Medtr1g090620.1	exocyst subunit exo70 family protein
Ca11473	Ca4	8626475	8629053	0.720333	2.08024	5.90272	4.83122e-06	0.00010756	4.15373	PREDICTED: uncharacterized protein LOC101504590 n_1 Tax_Cicer arietinum RepID_UPI00032A62F4	AT3G52170.2	DNA binding	Medtr1g090853.1	DNA-binding protein PD2
Ca11476	Ca4	8654217	8658285	-0.34735	4.04116	-4.89076	5.88705e-05	0.000617999	1.52385	SEC12p-like protein n_3 Tax_Papilionoideae RepID_A0A072VNK4_MEDTR	AT3G52190.1	phosphate transporter traffic facilitator1	Medtr1g090873.1	SEC12p-like protein
Ca11512	Ca4	9049278	9053298	-0.57287	3.3551	-4.71943	9.04427e-05	0.000828336	1.15761	PREDICTED: uncharacterized protein LOC101489512 n_1 Tax_Cicer arietinum RepID_UPI00032AB1C3	AT5G04670.1	Enhancer of polycomb-like transcription factor protein	Medtr1g092650.2	enhancer of polycomb-like transcription factor protein
Ca11526	Ca4	9092276	9095136	0.519763	3.70384	6.42557	1.37738e-06	4.52347e-05	5.2839	PREDICTED: uncharacterized protein LOC101490156 n_1 Tax_Cicer arietinum RepID_UPI00032AAEDB	AT3G20930.1	RNA-binding (RRM/RBD/RNP motifs) family protein	Medtr1g092860.1	RNA-binding (RRM/RBD/RNP motif) family protein%2C putative
Ca11523	Ca4	9145202	9147582	-1.52332	4.19984	-13.0219	3.41512e-12	1.21499e-08	17.9678	Myb-like transcription factor family protein n_1 Tax_Medicago truncatula RepID_G7I465_MEDTR	#N/A	#N/A	Medtr1g093080.3	myb-like transcription factor family protein
Ca11545	Ca4	9389736	9393584	1.08175	1.6834	8.49723	1.33309e-08	2.17435e-06	9.8161	Uncharacterized protein n_2 Tax_Papilionoideae RepID_G7I4Z2_MEDTR	AT3G25620.1	ABC-2 type transporter family protein	Medtr1g093990.1	white-brown-complex ABC transporter family protein
Ca11542	Ca4	9395564	9396523	-1.63626	5.83423	-6.35697	1.62108e-06	5.0293e-05	5.07232	Putative uncharacterized protein (Fragment) n_1 Tax_Cicer arietinum RepID_B0L636_CICAR	#N/A	#N/A	#N/A
Ca11554	Ca4	9473948	9482755	-1.03958	0.865102	-5.16235	2.98822e-05	0.000374937	2.52149	No Hits	#N/A	#N/A	Medtr6g029530.1	galactose-1-phosphate uridylyltransferase
Ca11566	Ca4	9495812	9503498	-0.565533	2.97097	-5.91487	4.69083e-06	0.000105977	4.14335	PREDICTED: uncharacterized protein LOC101501047 n_1 Tax_Cicer arietinum RepID_UPI00032AC393	AT4G23160.1	cysteine-rich RLK (RECEPTOR-like protein kinase) 8	Medtr7g015680.1	hypothetical protein
Ca11565	Ca4	9517483	9518795	0.775909	2.52978	7.67047	7.93133e-08	7.26405e-06	8.17539	PREDICTED: 54S ribosomal protein L51 - mitochondrial-like n_1 Tax_Cicer arietinum RepID_UPI00032A8BC4	AT3G59650.2	mitochondrial ribosomal protein L51/S25/CI-B8 family protein	Medtr8g022770.1	ribosomal protein L51/S25/CI-B8 domain protein
Ca11559	Ca4	9577833	9582201	0.503541	5.7957	8.986	4.84734e-09	1.07449e-06	10.8651	PREDICTED: uncharacterized protein LOC101503937 isoform X1 n_2 Tax_Cicer arietinum RepID_UPI00032AA3B8	#N/A	#N/A	Medtr1g094190.1	RNA pseudouridine synthase
Ca11568	Ca4	9667695	9674394	-0.367001	5.45388	-5.07385	3.72554e-05	0.000437987	1.95213	PREDICTED: pumilio homolog 4 isoform X1 n_4 Tax_Cicer arietinum RepID_UPI00032A87CB	AT3G10360.1	pumilio 4	Medtr1g094630.1	pumilio-family RNA-binding repeatprotein
Ca11588	Ca4	9699125	9703324	-0.358577	6.65519	-7.02928	3.36599e-07	1.8659e-05	6.64251	Arsenical pump-driving ATPase-like protein n_5 Tax_Papilionoideae RepID_G7I505_MEDTR	AT3G10350.1	P-loop containing nucleoside triphosphate hydrolases superfamily protein	Medtr1g094680.2	arsenical pump-driving ATPase-like protein
Ca11589	Ca4	9834297	9837931	0.788156	4.57828	5.63917	9.1925e-06	0.000161117	3.35007	PREDICTED: GATA transcription factor 8 n_1 Tax_Cicer arietinum RepID_UPI00032ABED0	AT3G54810.2	Plant-specific GATA-type zinc finger transcription factor family protein	Medtr1g094930.1	GATA type zinc finger transcription factor family protein
Ca11606	Ca4	10064502	10067509	-0.555244	4.8431	-6.30829	1.82035e-06	5.37037e-05	4.96314	PREDICTED: serine carboxypeptidase-like 27 n_1 Tax_Cicer arietinum RepID_UPI00032ABC31	AT3G07990.1	serine carboxypeptidase-like 27	Medtr1g095560.2	serine carboxypeptidase-like protein
Ca11610	Ca4	10146458	10151529	0.349657	4.03002	4.98803	4.61581e-05	0.000513445	1.77583	Uncharacterized protein n_1 Tax_Populus trichocarpa RepID_U5GAS9_POPTR	AT5G51280.1	DEAD-box protein abstrakt, putative	Medtr1g095810.1	DEAD-box ATP-dependent RNA helicase
Ca11654	Ca4	10520737	10524814	-0.443516	6.8147	-4.69016	9.73352e-05	0.000867565	1.00751	Sucrose transport protein n_3 Tax_Papilionoideae RepID_O04077_VICFA	AT1G22710.1	sucrose-proton symporter 2	Medtr1g096910.1	sucrose proton symporter%2C putative
Ca11672	Ca4	10722523	10725127	0.872609	3.03952	6.44148	1.32642e-06	4.40626e-05	5.36935	Uncharacterized protein n_9 Tax_Papilionoideae RepID_I1LDA9_SOYBN	AT1G69640.1	sphingoid base hydroxylase 1	Medtr1g097310.2	sphingoid base hydroxylase-like protein
Ca11669	Ca4	10768217	10772177	1.03637	2.24902	4.78155	7.73946e-05	0.00074779	1.51769	PREDICTED: polyadenylate-binding protein 3-like isoform X1 n_2 Tax_Cicer arietinum RepID_UPI00032A8321	AT1G71770.2	poly(A)-binding protein 5	Medtr1g097440.2	polyadenylate-binding protein
Ca11707	Ca4	11051512	11054666	0.650041	7.93261	5.02815	4.17563e-05	0.00047697	1.82593	Putative uncharacterized protein n_10 Tax_Magnoliophyta RepID_F6GY49_VITVI	AT1G43170.4	ribosomal protein 1	Medtr1g098540.1	60S ribosomal protein L3B
Ca11719	Ca4	11143747	11147182	-0.384419	3.95284	-5.11029	3.40194e-05	0.000408099	2.10044	Tubby-like F-box protein n_2 Tax_Papilionoideae RepID_G7ICY3_MEDTR	AT1G76900.2	tubby like protein 1	Medtr1g098790.4	tubby-F-box-like protein
Ca11732	Ca4	11471432	11477919	0.350921	5.31738	5.14026	3.15716e-05	0.000388173	2.11663	ABC transporter-like family-protein n_3 Tax_Papilionoideae RepID_G7ID28_MEDTR	AT3G59140.1	multidrug resistance-associated protein 14	Medtr1g099280.1	ABC transporter-like family-protein
Ca11775	Ca4	11935191	11939455	-0.507579	4.84473	-5.65097	8.93027e-06	0.000158089	3.37824	PREDICTED: protein NLP6 n_1 Tax_Cicer arietinum RepID_UPI00032A8320	AT1G64530.1	Plant regulator RWP-RK family protein	Medtr1g100970.2	plant regulator RWP-RK family protein
Ca11784	Ca4	12065074	12067673	0.783537	2.37854	5.52076	1.22984e-05	0.000195942	3.21536	PREDICTED: zinc finger CCHC domain-containing protein 9-like n_1 Tax_Cicer arietinum RepID_UPI00032AB085	AT5G52380.1	VASCULAR-RELATED NAC-DOMAIN 6	#N/A
Ca11800	Ca4	12113327	12118174	4.45282	3.3987	4.86251	6.31844e-05	0.00065034	1.76351	PREDICTED: low-temperature-induced 65 kDa protein-like isoform X3 n_1 Tax_Cicer arietinum RepID_UPI000641089C	#N/A	#N/A	Medtr1g100627.1	hypothetical protein
Ca11817	Ca4	12390082	12393447	-1.51666	0.950353	-8.07406	3.28344e-08	4.10144e-06	8.65251	PREDICTED: F-box protein PP2-A13 n_1 Tax_Cicer arietinum RepID_UPI00032ACEC1	AT5G52120.1	phloem protein 2-A14	Medtr1g101390.1	F-box protein PP2-A13
Ca11819	Ca4	12440377	12443520	-0.508146	6.40634	-4.7248	8.92324e-05	0.000821185	1.0934	PREDICTED: traB domain-containing protein isoform X1 n_2 Tax_Cicer arietinum RepID_UPI00032AB0B2	AT5G52030.1	TraB family protein	Medtr1g101540.1	TraB family protein
Ca11832	Ca4	12560177	12564080	0.606871	3.96851	6.51597	1.11221e-06	3.93779e-05	5.47932	PfkB family carbohydrate kinase n_2 Tax_Papilionoideae RepID_G7IC32_MEDTR	AT1G66430.1	pfkB-like carbohydrate kinase family protein	Medtr1g101950.1	pfkB family carbohydrate kinase
Ca11843	Ca4	12620686	12623805	-0.862218	5.00338	-7.32736	1.70749e-07	1.22038e-05	7.3181	PREDICTED: uncharacterized protein LOC103333282 n_1 Tax_Prunus mume RepID_UPI00046DF5E3	AT5G62180.1	carboxyesterase 20	Medtr1g102160.1	gibberellin receptor GID1%2C putative
Ca11854	Ca4	12718261	12720116	0.397613	2.81541	4.7345	8.70872e-05	0.000808251	1.2873	PREDICTED: uncharacterized protein LOC101495111 n_1 Tax_Cicer arietinum RepID_UPI00032A6775	AT5G62200.1	Embryo-specific protein 3, (ATS3)	Medtr1g102420.1	embryo-specific protein
Ca11945	Ca4	13659572	13661606	0.340507	12.699	5.81621	5.96275e-06	0.000122089	3.57416	Thiazole biosynthetic enzyme n_4 Tax_Pentapetalae RepID_A0A072W0W5_MEDTR	AT5G54770.1	thiazole biosynthetic enzyme, chloroplast (ARA6) (THI1) (THI4)	Medtr1g105480.1	thiazole biosynthetic enzyme
Ca11953	Ca4	13714949	13717899	0.719676	1.38949	4.6719	0.000101897	0.000894961	1.29919	PREDICTED: uncharacterized protein LOC101508033 isoform X1 n_2 Tax_Cicer arietinum RepID_UPI00032A90CD	#N/A	#N/A	Medtr1g105555.1	transmembrane protein%2C putative
Ca11990	Ca4	14019302	14019841	1.11018	2.03941	8.32894	1.90237e-08	2.85154e-06	9.5372	PREDICTED: phytosulfokines 3-like n_1 Tax_Cicer arietinum RepID_UPI00032A4F06	#N/A	#N/A	Medtr1g106030.1	phytosulfokine precursor protein
Ca12042	Ca4	14453792	14455231	-0.371714	6.62515	-5.23588	2.48883e-05	0.000327878	2.35743	Glycosyltransferase n_1 Tax_Cicer arietinum RepID_A0A067XTJ2_CICAR	AT4G15480.1	UDP-Glycosyltransferase superfamily protein	Medtr3g049970.1	limonoid UDP-glucosyltransferase-like protein
Ca12047	Ca4	14533120	14536103	-0.837164	3.22208	-5.65788	8.78021e-06	0.000155974	3.55374	PREDICTED: receptor protein kinase-like protein At4g34220 n_1 Tax_Cicer arietinum RepID_UPI00032A9304	AT4G34220.1	Leucine-rich repeat protein kinase family protein	Medtr1g107460.1	LRR receptor-like kinase family protein
Ca12051	Ca4	14570000	14573221	1.26916	3.25132	5.87908	5.11671e-06	0.000111413	4.02049	D-3-phosphoglycerate dehydrogenase n_8 Tax_Papilionoideae RepID_A0A072VR00_MEDTR	AT4G34200.1	D-3-phosphoglycerate dehydrogenase	Medtr1g107480.1	D-3-phosphoglycerate dehydrogenase family protein
Ca12073	Ca4	14651824	14657980	-0.205514	5.87459	-4.93794	5.23147e-05	0.000563092	1.61892	Phosphatidylinositol-3 -4 -5-trisphosphate 3-phosphatase n_2 Tax_Papilionoideae RepID_A0A072VR13_MEDTR	AT3G50110.1	PTEN 3	Medtr1g107540.1	phosphatidylinositol-3%2C4%2C5-trisphosphate 3-phosphatase
Ca12074	Ca4	14672826	14676949	-0.92863	6.02219	-10.2072	4.42448e-10	2.11476e-07	13.2365	PREDICTED: multicopper oxidase LPR2-like n_1 Tax_Cicer arietinum RepID_UPI00032A993F	AT1G71040.1	Cupredoxin superfamily protein	Medtr1g107555.1	spore coat A-like protein
Ca12083	Ca4	14840950	14846472	-0.635796	5.37994	-4.97106	4.81569e-05	0.000529518	1.69784	Repressor of RNA polymerase III transcription n_3 Tax_Papilionoideae RepID_G7IAU6_MEDTR	#N/A	#N/A	Medtr1g108610.2	repressor of RNA polymerase III transcription MAF1 protein
Ca12098	Ca4	14904458	14907877	-0.441844	7.34535	-4.86488	6.28115e-05	0.00064781	1.43611	PREDICTED: fruit protein pKIWI502 n_1 Tax_Cicer arietinum RepID_UPI00032A54A9	AT1G15140.3	FAD/NAD(P)-binding oxidoreductase	Medtr1g108710.1	ferredoxin reductase-like NAD(P) binding domain protein
Ca12092	Ca4	14928905	14938346	0.396206	4.96378	5.65131	8.92292e-06	0.000158089	3.37313	PREDICTED: MATE efflux family protein 5-like n_1 Tax_Cicer arietinum RepID_UPI00032ACB33	AT1G15160.1	MATE efflux family protein	Medtr1g108840.1	MATE efflux family protein
Ca12101	Ca4	15002201	15006261	0.356466	6.01407	5.0708	3.75403e-05	0.000438974	1.94784	Fructose-bisphosphate aldolase n_6 Tax_Papilionoideae RepID_A0A072VQ58_MEDTR	AT2G01140.1	Aldolase superfamily protein	Medtr1g109200.1	fructose-bisphosphate aldolase
Ca12106	Ca4	15088987	15090779	0.688861	4.05193	5.70639	7.79661e-06	0.000145426	3.53863	PREDICTED: putative zinc finger protein At1g68190 n_1 Tax_Cicer arietinum RepID_UPI00032A539B	AT1G68190.1	B-box zinc finger family protein	Medtr1g109350.1	B-box zinc finger protein%2C putative
Ca12113	Ca4	15260026	15269555	-0.325157	4.25484	-5.36188	1.82081e-05	0.000261742	2.68185	Nucleotidyltransferase n_5 Tax_Papilionoideae RepID_A0A072VR82_MEDTR	ATMG00860.1	DNA/RNA polymerases superfamily protein	Medtr1g109590.2	nucleotidyltransferase
Ca12120	Ca4	15336821	15340954	-0.583335	5.17903	-7.07319	3.04351e-07	1.73696e-05	6.73915	PREDICTED: uncharacterized protein LOC101515007 n_1 Tax_Cicer arietinum RepID_UPI00032AAD93	AT1G15030.1	Protein of unknown function (DUF789)	Medtr1g110070.1	DUF789 family protein
Ca12154	Ca4	15867703	15870174	0.632338	4.26266	5.03552	4.09951e-05	0.000468976	1.88481	PREDICTED: ethylene-responsive transcription factor ERF118 n_1 Tax_Cicer arietinum RepID_UPI00032AA44A	AT1G68550.2	Integrase-type DNA-binding superfamily protein	Medtr8g023680.1	ethylene-responsive transcription factor ERF118-like protein
Ca12165	Ca4	16065650	16069685	-1.04284	6.61789	-8.85044	6.39727e-09	1.24185e-06	10.5898	PREDICTED: uncharacterized protein ycf45 n_1 Tax_Cicer arietinum RepID_UPI00032AA7D0	AT3G10420.2	P-loop containing nucleoside triphosphate hydrolases superfamily protein	Medtr1g111400.1	P-loop nucleoside triphosphate hydrolase superfamily protein
Ca12175	Ca4	16077493	16079679	0.346355	6.97093	4.7078	9.31194e-05	0.000846767	1.04867	40S ribosomal S3-like protein n_14 Tax_fabids RepID_B7FH64_MEDTR	AT2G31610.1	Ribosomal protein S3 family protein	Medtr1g044660.1	40S ribosomal S3-like protein
Ca12177	Ca4	16122774	16125526	0.304358	3.96848	5.39232	1.68869e-05	0.000249481	2.77888	PREDICTED: serine/threonine protein phosphatase 2A 57 kDa regulatory subunit B'''' beta isoform-like n_1 Tax_Cicer arietinum RepID_UPI00032A8A73	AT5G03470.1	Protein phosphatase 2A regulatory B subunit family protein	Medtr1g111570.1	protein phosphatase 2A regulatory B subunit family protein
Ca12179	Ca4	16129148	16135614	0.841846	2.70709	5.5392	1.17525e-05	0.000190015	3.21264	PREDICTED: probable pectate lyase 18 n_1 Tax_Cicer arietinum RepID_UPI00032AA159	AT5G04310.1	Pectin lyase-like superfamily protein	Medtr1g111590.1	pectate lyase family protein
Ca12195	Ca4	16301662	16303682	0.879142	0.870163	5.54018	1.17242e-05	0.000189758	3.39367	Putative uncharacterized protein n_2 Tax_Cicer arietinum RepID_Q8L5X7_CICAR	#N/A	#N/A	Medtr1g111990.1	transmembrane protein%2C putative
Ca12193	Ca4	16321337	16334156	0.397746	3.74832	4.77374	7.89258e-05	0.000757797	1.25611	PREDICTED: tubulin-folding cofactor D n_1 Tax_Cicer arietinum RepID_UPI00032A5D68	AT3G60740.1	ARM repeat superfamily protein	Medtr1g112130.2	beta-tubulin folding cofactor D
Ca12204	Ca4	16398004	16403262	0.296638	5.72286	4.91285	5.57047e-05	0.000592492	1.55558	Proteasome subunit alpha type-5-A isoform 1 n_2 Tax_Theobroma cacao RepID_A0A061GDA5_THECC	AT1G53850.2	20S proteasome alpha subunit E1	Medtr1g112250.2	20S proteasome subunit alpha
Ca12206	Ca4	16407430	16414461	0.320504	5.11261	6.41615	1.4085e-06	4.58361e-05	5.21118	PREDICTED: protein indeterminate-domain 5 - chloroplastic n_1 Tax_Cicer arietinum RepID_UPI00032AC6CF	AT2G02080.1	indeterminate(ID)-domain 4	Medtr1g112270.2	C2H2 zinc finger protein%2C putative
Ca12202	Ca4	16427305	16435937	-0.908807	5.0133	-4.84605	6.58435e-05	0.000671384	1.39049	PREDICTED: protein ACCUMULATION AND REPLICATION OF CHLOROPLASTS 3 isoform X1 n_2 Tax_Cicer arietinum RepID_UPI00032AA5CD	AT1G75010.1	GTP binding	Medtr1g112280.2	protein accumulation AND replication OFs protein
Ca12227	Ca4	16670736	16674289	0.434331	3.41561	6.53698	1.05845e-06	3.79134e-05	5.57259	PREDICTED: probable protein phosphatase 2C 79 n_1 Tax_Cicer arietinum RepID_UPI00032A8397	AT3G51370.2	Protein phosphatase 2C family protein	Medtr1g112840.1	serine/threonine phosphatase family%2C 2C domain protein
Ca12249	Ca4	16796407	16801315	0.921762	4.81745	6.35111	1.64383e-06	5.05883e-05	5.06178	PREDICTED: mechanosensitive ion channel protein 6-like n_1 Tax_Cicer arietinum RepID_UPI00032A6B3C	AT1G78610.1	mechanosensitive channel of small conductance-like 6	Medtr1g113850.1	mechanosensitive ion channel family protein
Ca12251	Ca4	16823477	16826511	1.40228	4.79108	7.01557	3.47365e-07	1.89748e-05	6.61211	Uncharacterized protein n_17 Tax_Papilionoideae RepID_I1MYV4_SOYBN	AT4G25630.1	fibrillarin 2	Medtr1g114000.1	mediator of RNA polymerase II transcription subunit 36a
Ca12280	Ca4	16992485	16995370	-0.401908	7.92458	-6.0779	3.16233e-06	7.9815e-05	4.39964	PREDICTED: thioredoxin X - chloroplastic n_1 Tax_Cicer arietinum RepID_UPI00032A66C4	AT1G50320.1	thioredoxin X	Medtr1g114290.1	thioredoxin-like protein
Ca12312	Ca4	17219947	17227299	-0.545629	5.37221	-4.76099	8.14886e-05	0.000773181	1.1773	PREDICTED: prolyl endopeptidase-like n_1 Tax_Cicer arietinum RepID_UPI00032AAB44	AT1G50380.1	Prolyl oligopeptidase family protein	Medtr1g115230.1	prolyl oligopeptidase family protein
Ca12309	Ca4	17228749	17231286	0.603804	4.34889	6.05384	3.35128e-06	8.3346e-05	4.3639	PREDICTED: uncharacterized protein LOC101496961 n_1 Tax_Cicer arietinum RepID_UPI00032ABC2E	AT2G31840.1	Thioredoxin superfamily protein	Medtr1g115235.3	thioredoxin superfamily protein%2C putative
Ca12314	Ca4	17294337	17299462	0.676986	3.89897	4.82884	6.87444e-05	0.00068902	1.38447	Elongator complex protein 1 n_4 Tax_Papilionoideae RepID_A0A072VSS4_MEDTR	AT5G13680.1	IKI3 family protein	Medtr1g115300.2	elongator complex protein
Ca12344	Ca4	17532912	17556066	-1.03386	3.41209	-5.85953	5.36591e-06	0.000114465	4.00799	PREDICTED: uncharacterized protein LOC106771799 n_1 Tax_Vigna radiata var. radiata RepID_UPI0007118821	AT5G66230.2	Chalcone-flavanone isomerase family protein	Medtr1g115820.1	chalcone-flavanone isomerase family protein
Ca12383	Ca4	17978042	17980645	0.311323	3.76308	6.01152	3.71179e-06	8.9665e-05	4.28432	PREDICTED: CDP-diacylglycerol--glycerol-3-phosphate 3-phosphatidyltransferase 2-like n_1 Tax_Cicer arietinum RepID_UPI00032A7EE5	#N/A	#N/A	#N/A
Ca12392	Ca4	18221019	18227049	0.530696	4.25194	4.90518	5.67837e-05	0.000601042	1.55624	PREDICTED: nucleolar complex protein 2 homolog n_1 Tax_Cicer arietinum RepID_UPI00032ABD10	AT2G18220.1	Noc2p family	Medtr1g110560.1	nucleolar complex-like protein
Ca12410	Ca4	18311568	18315189	0.498266	5.05743	6.07937	3.15118e-06	7.96984e-05	4.40924	PREDICTED: uncharacterized protein LOC101495445 n_1 Tax_Cicer arietinum RepID_UPI00032A8344	AT1G05870.4	Protein of unknown function (DUF1685)	Medtr1g116590.3	DUF1685 family protein
Ca12439	Ca4	18693631	18695129	-1.18528	2.46485	-8.2534	2.23438e-08	3.21594e-06	9.39725	PREDICTED: E3 ubiquitin-protein ligase SGR9 - amyloplastic-like n_1 Tax_Cicer arietinum RepID_UPI00032A7647	#N/A	#N/A	Medtr1g067260.1	hypothetical protein
Ca12445	Ca4	18819150	18821630	1.88688	4.90215	8.97635	4.94362e-09	1.08018e-06	10.8572	PREDICTED: glutathione S-transferase L3-like n_1 Tax_Cicer arietinum RepID_UPI00032ABB0B	AT5G02790.1	Glutathione S-transferase family protein	Medtr1g067180.4	glutathione S-transferase tau
Ca12464	Ca4	19046772	19048318	0.590141	6.5698	5.31968	2.0215e-05	0.00028108	2.56213	Uncharacterized protein n_8 Tax_Papilionoideae RepID_V7BG17_PHAVU	AT5G02960.1	Ribosomal protein S12/S23 family protein	Medtr1g066860.1	40S ribosomal protein S23-1
Ca12471	Ca4	19207783	19209799	1.06199	2.40724	7.31491	1.75618e-07	1.23627e-05	7.40784	PREDICTED: zinc finger protein JACKDAW-like n_1 Tax_Cicer arietinum RepID_UPI00032AA379	AT3G50700.1	indeterminate(ID)-domain 2	Medtr8g017210.1	C2H2-like zinc finger protein%2C putative
Ca12482	Ca4	19425901	19428526	0.423907	3.54266	6.73551	6.64423e-07	2.83074e-05	6.02356	PREDICTED: auxin response factor 18-like n_1 Tax_Cicer arietinum RepID_UPI00032A5F4B	AT4G30080.1	auxin response factor 16	Medtr1g064430.2	auxin response factor 1
Ca12489	Ca4	19610002	19613751	1.54084	8.16011	8.24435	2.27798e-08	3.22608e-06	9.31329	Phenylalanine ammonia-lyase n_13 Tax_Papilionoideae RepID_A5YMH3_ASTPN	AT2G37040.1	PHE ammonia lyase 1	Medtr1g064090.1	phenylalanine ammonia-lyase-like protein
Ca12522	Ca4	20029125	20031937	-0.879401	5.78268	-8.64836	9.71728e-09	1.70834e-06	10.1726	PREDICTED: uncharacterized protein LOC101514684 n_1 Tax_Cicer arietinum RepID_UPI00032A82FE	AT2G36895.2	#N/A	Medtr1g063100.1	hypothetical protein
Ca12567	Ca4	21034193	21040552	0.428001	7.10018	6.83455	5.27652e-07	2.43085e-05	6.19215	Pyruvate kinase n_24 Tax_Papilionoideae RepID_I1LZE1_SOYBN	AT3G52990.1	Pyruvate kinase family protein	Medtr7g103420.1	pyruvate kinase family protein
Ca12628	Ca4	22132554	22136159	0.499538	5.40914	5.04965	3.95739e-05	0.000457162	1.89886	PREDICTED: uncharacterized protein LOC101499059 isoform X1 n_3 Tax_Cicer arietinum RepID_UPI00032A5BF7	AT3G11760.1	PTHR31182:SF2 - F26K24.5 PROTEIN (1 of 1)	Medtr1g056180.1	EEIG1/EHBP1 protein amine-terminal domain protein
Ca12673	Ca4	22727780	22731912	0.447233	4.83953	4.81922	7.04215e-05	0.00069896	1.32355	PREDICTED: ribosome biogenesis protein NSA2 homolog n_2 Tax_Cicer arietinum RepID_UPI00032A7E73	AT5G06360.1	Ribosomal protein S8e family protein	Medtr3g088865.1	ribosomal protein S8e family protein
Ca12717	Ca4	23750782	23764146	0.427806	3.29632	5.04148	4.03895e-05	0.000463562	1.96689	PREDICTED: uncharacterized protein LOC101500533 n_1 Tax_Cicer arietinum RepID_UPI00032A7831	AT1G35660.1	PTHR15000:SF1 - ERYTHROID DIFFERENTIATION-RELATED FACTOR 1 (1 of 1)	Medtr1g050670.2	erythroid differentiation-related factor 1%2C putative
Ca12723	Ca4	23832084	23842008	0.431124	5.70797	7.86039	5.2231e-08	5.29055e-06	8.49824	Kinase and PP2C-like domain protein n_2 Tax_Papilionoideae RepID_G7I7C7_MEDTR	AT2G40860.1	protein kinase family protein / protein phosphatase 2C ( PP2C) family protein	Medtr1g050520.1	kinase and PP2C-like domain protein
Ca12741	Ca4	23914322	23917648	0.722577	2.25815	4.84096	6.66894e-05	0.000676734	1.56742	PREDICTED: pentatricopeptide repeat-containing protein At1g80270 - mitochondrial-like n_1 Tax_Cicer arietinum RepID_UPI0006415E99	AT1G80270.3	PENTATRICOPEPTIDE REPEAT 596	Medtr1g050750.1	DNA-binding protein
Ca12795	Ca4	24567414	24575152	0.465593	6.16706	7.67391	7.87115e-08	7.25236e-06	8.09116	GDT1-like protein n_2 Tax_Papilionoideae RepID_A0A072VSW1_MEDTR	AT4G13590.1	Uncharacterized protein family (UPF0016)	Medtr1g046730.1	GDT1-like protein
Ca12805	Ca4	24713928	24726664	-0.410463	8.80881	-4.93871	5.22143e-05	0.000562407	1.58381	ABC1/COQ8 Serine/Threonine kinase n_2 Tax_Papilionoideae RepID_A0A072VGN0_MEDTR	AT3G24190.1	Protein kinase superfamily protein	Medtr1g046620.1	ABC1/COQ8 Serine/Threonine kinase
Ca12812	Ca4	24823200	24827569	0.418811	6.35861	5.77855	6.53615e-06	0.000130175	3.68509	3-ketoacyl-CoA thiolase 2 - peroxisomal-like protein n_5 Tax_Papilionoideae RepID_A0A072VIH3_MEDTR	AT2G33150.1	peroxisomal 3-ketoacyl-CoA thiolase 3	Medtr1g047210.1	3-ketoacyl-CoA thiolase 2%2C peroxisomal-like protein
Ca12822	Ca4	25051636	25057692	-1.4498	6.60977	-5.8138	5.9978e-06	0.000122642	3.76923	Pectate lyase n_4 Tax_Papilionoideae RepID_A0A072VT00_MEDTR	AT1G04680.1	Pectin lyase-like superfamily protein	Medtr1g047370.1	pectate lyase family protein
Ca12861	Ca4	25735387	25737548	0.724271	6.29337	4.73698	8.6547e-05	0.000806647	1.1218	60S ribosomal L4-like protein n_7 Tax_Papilionoideae RepID_G7I6N5_MEDTR	AT3G09630.1	Ribosomal protein L4/L1 family	Medtr1g045410.1	60S ribosomal L4-like protein
Ca12862	Ca4	25754548	25757027	0.65301	6.56771	5.59581	1.02251e-05	0.000173172	3.23899	40S ribosomal S3-like protein n_14 Tax_fabids RepID_B7FH64_MEDTR	AT2G31610.1	Ribosomal protein S3 family protein	Medtr6g052140.1	40S ribosomal S3-like protein
Ca12868	Ca4	25871321	25879867	0.398848	5.17636	4.82825	6.88461e-05	0.00068944	1.34484	PREDICTED: pre-mRNA-processing factor 19 homolog 2 n_1 Tax_Cicer arietinum RepID_UPI00032A9D49	AT2G33340.3	MOS4-associated complex 3B	Medtr1g044720.1	Pre-mRNA-processing factor
Ca12895	Ca4	26205886	26207662	-0.347455	8.41393	-5.44789	1.47201e-05	0.000225144	2.86437	Proton gradient regulation protein n_11 Tax_Papilionoideae RepID_G7I6M5_MEDTR	AT2G05620.1	proton gradient regulation 5	Medtr1g045140.1	proton gradient regulation protein
Ca12892	Ca4	26214627	26215502	0.698148	3.45235	5.06469	3.81165e-05	0.000444125	2.04463	PREDICTED: uncharacterized protein LOC101491036 n_1 Tax_Cicer arietinum RepID_UPI00032A961A	#N/A	#N/A	Medtr1g045060.1	transmembrane protein%2C putative
Ca12928	Ca4	27081334	27086120	-0.70097	1.09462	-4.98664	4.63188e-05	0.000513988	2.11176	PREDICTED: uncharacterized protein LOC101498608 n_1 Tax_Cicer arietinum RepID_UPI00032A5CF7	#N/A	#N/A	Medtr1g042820.1	DUF761 domain protein
Ca12945	Ca4	27421878	27427957	-0.279821	5.59172	-5.88462	5.04833e-06	0.000110464	3.93951	Casein kinase I-like protein n_2 Tax_Papilionoideae RepID_G7I3R5_MEDTR	AT3G23340.1	casein kinase I-like 10	Medtr1g042280.2	casein kinase I-like protein
Ca12955	Ca4	27646054	27650186	-0.378965	6.63142	-6.4192	1.39834e-06	4.56999e-05	5.22222	PREDICTED: aldo-keto reductase n_1 Tax_Cicer arietinum RepID_UPI00032A6A49	AT1G04420.1	NAD(P)-linked oxidoreductase superfamily protein	Medtr1g042730.1	aldo/keto reductase family oxidoreductase
Ca13018	Ca4	28644531	28650193	-0.320204	7.03017	-6.50031	1.15411e-06	4.02143e-05	5.41165	PREDICTED: probable plastid-lipid-associated protein 13 - chloroplastic n_1 Tax_Cicer arietinum RepID_UPI00032A90B3	AT2G42130.1	Plastid-lipid associated protein PAP / fibrillin family protein	Medtr1g054070.2	plastid lipid-associated protein
Ca13055	Ca4	29412224	29414620	-0.46462	3.2005	-4.68652	9.82282e-05	0.000870542	1.1307	PREDICTED: protein QUIRKY-like n_1 Tax_Cicer arietinum RepID_UPI00032A8A6F	AT5G06850.1	C2 calcium/lipid-binding plant phosphoribosyltransferase family protein	Medtr0291s0010.1	calcium-dependent lipid-binding (CaLB domain) family protein
Ca13108	Ca4	30267226	30269677	-1.03912	0.731802	-4.57102	0.000131268	0.00107481	1.15481	PREDICTED: protein IQ-DOMAIN 14-like n_1 Tax_Cicer arietinum RepID_UPI00064177E9	AT4G14750.1	IQ-domain 19	Medtr1g041430.1	IQ calmodulin-binding motif protein
Ca13121	Ca4	30417222	30423471	-0.410677	3.58547	-5.00255	4.45136e-05	0.000500247	1.8443	Auxin canalization protein n_5 Tax_Papilionoideae RepID_A0A072VHY8_MEDTR	AT3G22810.1	Plant protein of unknown function (DUF828) with plant pleckstrin homology-like region	Medtr1g041395.2	auxin canalisation protein
Ca13143	Ca4	30751344	30753306	-0.420179	4.99285	-4.71259	9.20084e-05	0.000838159	1.05744	PREDICTED: uncharacterized protein LOC101505674 n_1 Tax_Cicer arietinum RepID_UPI00032AC53D	AT4G14620.1	Protein of unknown function (DUF506)	Medtr1g041155.1	DUF506 family protein
Ca13163	Ca4	31054825	31061604	1.18679	0.366676	4.79323	7.51621e-05	0.000734575	1.66587	PREDICTED: lysM domain receptor-like kinase 4 n_1 Tax_Cicer arietinum RepID_UPI00032A89FA	AT2G33580.1	Protein kinase superfamily protein	Medtr5g042440.1	LysM-domain receptor-like kinase
Ca13215	Ca4	31901795	31917408	-0.292598	5.92067	-5.87905	5.11719e-06	0.000111413	3.92824	PREDICTED: DNA helicase INO80-like isoform X2 n_1 Tax_Cicer arietinum RepID_UPI00032AC887	AT3G57300.2	INO80 ortholog	Medtr7g090960.1	DNA helicase INO80-like protein
Ca13283	Ca4	33062607	33064241	0.988507	2.75317	7.5154	1.11947e-07	9.20556e-06	7.83317	PREDICTED: protein ASPARTIC PROTEASE IN GUARD CELL 2 n_1 Tax_Cicer arietinum RepID_UPI00032AAE37	AT3G20015.1	Eukaryotic aspartyl protease family protein	Medtr1g039270.1	aspartic protease in GUARD CELL-like protein
Ca13295	Ca4	33304461	33309300	0.425505	4.32112	5.11647	3.35e-05	0.000404406	2.07414	Microtubule associated protein - MAP65/ASE1 family protein n_4 Tax_Papilionoideae RepID_G7IBG9_MEDTR	AT2G01910.2	Microtubule associated protein (MAP65/ASE1) family protein	Medtr1g038840.2	microtubule associated protein%2C MAP65/ASE1 family protein
Ca13354	Ca4	34086658	34089992	-0.344921	3.2547	-4.67565	0.000100943	0.000889646	1.08901	PREDICTED: tobamovirus multiplication protein 3-like n_1 Tax_Cicer arietinum RepID_UPI00032AD2D6	#N/A	#N/A	#N/A
Ca13373	Ca4	34286060	34290969	1.57934	0.841143	4.66988	0.000102416	0.000898311	1.38253	PREDICTED: extra-large guanine nucleotide-binding protein 1-like isoform X1 n_2 Tax_Cicer arietinum RepID_UPI00032AB865	AT2G23460.1	extra-large G-protein 1	Medtr1g034300.1	extra-large GTP-binding protein
Ca13370	Ca4	34354920	34356131	-1.11977	1.68048	-4.62561	0.000114453	0.000970677	1.24046	Uncharacterized protein n_3 Tax_Papilionoideae RepID_B7FND4_MEDTR	AT2G16050.1	Cysteine/Histidine-rich C1 domain family protein	Medtr1g034390.1	cysteine/histidine-rich C1 domain protein
Ca13392	Ca4	34497839	34499490	-0.337816	4.48659	-4.90808	5.63731e-05	0.000597938	1.55656	Splicing factor U2af small subunit A-like protein n_3 Tax_Papilionoideae RepID_G7IA30_MEDTR	AT5G42820.2	Zinc finger C-x8-C-x5-C-x3-H type family protein	Medtr1g035130.6	splicing factor U2af small subunit A-like protein
Ca13407	Ca4	34850859	34857061	1.45057	0.0889744	7.61431	8.98217e-08	7.94117e-06	7.81652	PREDICTED: probable RNA-dependent RNA polymerase 1 n_1 Tax_Cicer arietinum RepID_UPI00032A7394	AT1G14790.1	RNA-dependent RNA polymerase 1	Medtr1g032590.1	RNA-directed RNA polymerase
Ca13410	Ca4	34857752	34863074	-0.624423	4.18136	-4.77087	7.94944e-05	0.000760392	1.21353	PREDICTED: CRAL-TRIO domain-containing protein YKL091C isoform X1 n_2 Tax_Cicer arietinum RepID_UPI00032A6191	AT1G14820.2	Sec14p-like phosphatidylinositol transfer family protein	Medtr1g032580.1	Sec14p-like phosphatidylinositol transfer family protein
Ca13445	Ca4	35008428	35012146	0.547797	2.50183	7.35818	1.59283e-07	1.18264e-05	7.48971	PREDICTED: probable UDP-3-O-[3-hydroxymyristoyl] N-acetylglucosamine deacetylase 2 n_1 Tax_Cicer arietinum RepID_UPI00032A9F9D	AT1G24793.2	UDP-3-O-acyl N-acetylglycosamine deacetylase family protein	Medtr1g032430.2	UDP-3-O-[3-hydroxymyristoyl] N-acetylglucosamine deacetylase
Ca13447	Ca4	35273565	35277086	-0.738503	1.24368	-5.56424	1.10503e-05	0.000181932	3.45369	PREDICTED: dynein light chain 2 - cytoplasmic n_1 Tax_Cicer arietinum RepID_UPI00032A8C40	AT1G23220.1	Dynein light chain type 1 family protein	Medtr8g104900.1	dynein light chain type 1 family protein
Ca13430	Ca4	35296550	35305338	1.21875	1.13487	4.69943	9.5096e-05	0.000856913	1.45097	PREDICTED: uncharacterized protein LOC101492873 n_1 Tax_Cicer arietinum RepID_UPI00032AC66C	AT1G12280.1	LRR and NB-ARC domains-containing disease resistance protein	Medtr1g031830.1	NBS-LRR type disease resistance protein
Ca13434	Ca4	35383116	35384519	0.740599	3.81608	5.54863	1.14828e-05	0.00018684	3.19872	PREDICTED: uncharacterized protein At4g22758 n_1 Tax_Cicer arietinum RepID_UPI00032AA61E	AT1G70780.1	PTHR33270:SF5 - GB (1 of 3)	Medtr1g031680.1	senescence-associated protein%2C putative
Ca13454	Ca4	35408635	35412511	-0.682932	4.67887	-7.28528	1.87786e-07	1.28223e-05	7.22838	Uncharacterized protein n_2 Tax_Papilionoideae RepID_B7FHH9_MEDTR	AT1G23110.5	#N/A	Medtr1g031620.3	hypothetical protein
Ca13455	Ca4	35426405	35436457	-0.78028	3.811	-9.66386	1.25433e-09	3.95017e-07	12.2168	Uncharacterized protein n_10 Tax_Brassicaceae RepID_M4EBL5_BRARP	AT2G01480.1	O-fucosyltransferase family protein	Medtr1g031590.1	O-fucosyltransferase family protein
Ca13461	Ca4	35513979	35519191	-0.84202	6.66334	-6.70249	7.17684e-07	2.95875e-05	5.8868	Auxin efflux carrier component n_5 Tax_Papilionoideae RepID_Q769J4_PEA	AT1G70940.1	Auxin efflux carrier family protein	Medtr1g030890.1	auxin efflux carrier family transporter
Ca13473	Ca4	35661262	35667371	0.701494	3.79877	5.79541	6.27285e-06	0.000126407	3.75606	Uncharacterized protein n_13 Tax_Papilionoideae RepID_I1MNU1_SOYBN	AT3G03960.1	TCP-1/cpn60 chaperonin family protein	Medtr1g030650.1	TCP-1/cpn60 chaperonin family protein
Ca13478	Ca4	35777767	35781771	-0.61176	4.28913	-5.80242	6.16648e-06	0.000124922	3.76665	PREDICTED: bifunctional protein FolD 1 - mitochondrial-like n_1 Tax_Cicer arietinum RepID_UPI00032A91CC	AT2G38660.3	Amino acid dehydrogenase family protein	Medtr1g030450.1	methylenetetrahydrofolate dehydrogenase
Ca13489	Ca4	35915083	35922722	-0.859873	7.99015	-8.19661	2.52284e-08	3.38481e-06	9.21972	Chlorophyllide A oxygenase n_2 Tax_Papilionoideae RepID_G7I8G8_MEDTR	AT1G44446.3	Pheophorbide a oxygenase family protein with Rieske [2Fe-2S] domain	Medtr7g005870.1	PPR containing plant-like protein
Ca13501	Ca4	36139192	36147057	-0.776732	7.19342	-6.40295	1.45332e-06	4.67968e-05	5.18186	PREDICTED: NAD kinase 2 - chloroplastic-like n_1 Tax_Cicer arietinum RepID_UPI00032A86D7	AT1G21640.1	NAD kinase 2	Medtr1g029620.2	NAD/NADH kinase family protein
Ca13526	Ca4	36316137	36318911	0.897174	4.81627	7.15633	2.51692e-07	1.56489e-05	6.94279	PREDICTED: bidirectional sugar transporter SWEET1 n_1 Tax_Cicer arietinum RepID_UPI00032AC953	AT1G21460.1	Nodulin MtN3 family protein	Medtr1g029380.1	bidirectional sugar transporter
Ca13535	Ca4	36520014	36523861	0.371651	3.27209	5.0459	3.99469e-05	0.000460323	2.00769	PREDICTED: plastid division protein PDV1 n_1 Tax_Cicer arietinum RepID_UPI00032A7006	AT5G53280.1	plastid division1	Medtr1g028580.1	plastid division PDV1-like protein%2C putative
Ca13537	Ca4	36569139	36576208	-0.45021	2.73034	-4.98183	4.68781e-05	0.000518064	1.88858	PREDICTED: dihydrofolate synthetase n_1 Tax_Cicer arietinum RepID_UPI00032A7041	AT5G41480.1	Folylpolyglutamate synthetase family protein	Medtr7g100937.1	folylpolyglutamate synthase
Ca13545	Ca4	36644429	36646662	0.655512	3.04577	6.84777	5.11707e-07	2.39344e-05	6.27093	Abscisic acid receptor PYL9-like protein n_2 Tax_Papilionoideae RepID_A0A072VQL7_MEDTR	AT5G53160.2	regulatory components of ABA receptor 3	Medtr1g028380.1	abscisic acid receptor PYL9-like protein
Ca13574	Ca4	37128385	37132953	0.884895	4.20724	6.33672	1.70109e-06	5.14194e-05	5.03837	PREDICTED: la protein 1 n_1 Tax_Cicer arietinum RepID_UPI00032A51B7	#N/A	#N/A	Medtr1g026890.1	RNA recognition motif protein
Ca13602	Ca4	37550285	37555076	-0.323412	6.24182	-5.79873	6.22219e-06	0.000125884	3.73391	PREDICTED: RNA polymerase sigma factor sigC n_1 Tax_Cicer arietinum RepID_UPI00032AC3E1	AT3G53920.1	RNApolymerase sigma-subunit C	Medtr1g007370.2	RNA polymerase sigma factor
Ca13611	Ca4	37674065	37677828	0.69728	4.59118	4.84101	6.66802e-05	0.000676734	1.37935	PREDICTED: uncharacterized protein LOC101511767 n_1 Tax_Cicer arietinum RepID_UPI00032A7373	AT5G48470.1	#N/A	Medtr1g007490.1	hypothetical protein
Ca13628	Ca4	37710895	37717115	-0.477993	2.60571	-6.55628	1.01138e-06	3.69379e-05	5.68158	PREDICTED: exonuclease mut-7 homolog n_1 Tax_Cicer arietinum RepID_UPI00032A4F0F	AT5G24340.1	3'-5' exonuclease domain-containing protein	#N/A
Ca13622	Ca4	37787268	37788721	2.43892	2.94271	5.76006	6.838e-06	0.000134374	3.82155	PREDICTED: uncharacterized protein LOC101488636 n_1 Tax_Cicer arietinum RepID_UPI00032A88A5	#N/A	#N/A	Medtr1g007840.1	transmembrane protein%2C putative
Ca13629	Ca4	37792389	37800397	-0.357669	4.34894	-4.69448	9.62835e-05	0.000861203	1.04089	PREDICTED: uncharacterized protein LOC101488974 n_1 Tax_Cicer arietinum RepID_UPI00032A7716	AT5G53050.3	alpha/beta-Hydrolases superfamily protein	Medtr1g007860.1	alpha/beta fold hydrolase
Ca13645	Ca4	38062583	38065803	-1.04605	6.67625	-9.65932	1.2655e-09	3.95017e-07	12.1973	PREDICTED: dehydration-responsive protein RD22 n_1 Tax_Cicer arietinum RepID_UPI00032A7BE2	AT5G25610.1	BURP domain-containing protein	Medtr1g008500.1	dehydration-responsive protein RD22
Ca13676	Ca4	38449476	38450925	-0.713359	4.53936	-6.38624	1.51212e-06	4.8183e-05	5.15101	PREDICTED: probable serine/threonine-protein kinase kinX isoform X1 n_2 Tax_Cicer arietinum RepID_UPI00032AAEE4	AT5G24890.1	KOG4210 - Nuclear localization sequence binding protein (1 of 9)	Medtr1g009640.1	hypothetical protein
Ca13677	Ca4	38460153	38468449	0.278799	4.5244	5.09412	3.54193e-05	0.000421864	2.01987	PREDICTED: pentatricopeptide repeat-containing protein At5g10690 n_1 Tax_Cicer arietinum RepID_UPI00032A94E6	AT5G10690.1	pentatricopeptide (PPR) repeat-containing protein / CBS domain-containing protein	Medtr1g009650.1	pentatricopeptide (PPR) repeat protein
Ca13683	Ca4	38573115	38575783	0.455227	4.73306	5.05071	3.94699e-05	0.000456996	1.89904	PREDICTED: zinc finger protein 622-like n_1 Tax_Cicer arietinum RepID_UPI00032A9E47	AT4G31420.2	Zinc finger protein 622	Medtr1g009770.1	C2H2-type zinc finger protein
Ca13696	Ca4	38659970	38662696	-0.396854	8.3675	-6.40608	1.44256e-06	4.65483e-05	5.17304	Plastid lipid-associated protein n_3 Tax_Papilionoideae RepID_A0A072VE99_MEDTR	AT5G19940.2	Plastid-lipid associated protein PAP / fibrillin family protein	Medtr1g009980.1	plastid lipid-associated protein
Ca13710	Ca4	38731748	38734223	0.813126	2.64135	5.61016	9.8709e-06	0.000169445	3.39506	PREDICTED: probable RNA 3''''-terminal phosphate cyclase-like protein n_1 Tax_Cicer arietinum RepID_UPI00032A768D	AT5G22100.1	RNA cyclase family protein	Medtr8g098715.3	RNA 3-terminal phosphate cyclase-like protein%2C putative
Ca13714	Ca4	38849644	38852342	0.481975	3.06131	7.26529	1.96479e-07	1.32971e-05	7.24771	PREDICTED: glucan endo-1 -3-beta-glucosidase 5 n_1 Tax_Cicer arietinum RepID_UPI00032A8F0B	AT4G31140.1	O-Glycosyl hydrolases family 17 protein	Medtr1g010120.1	glucan endo-1%2C3-beta-glucosidase-like protein
Ca13753	Ca4	39191841	39202859	-0.426468	3.40089	-7.29081	1.85449e-07	1.27768e-05	7.28576	PREDICTED: carbon catabolite repressor protein 4 homolog 6 isoform X1 n_2 Tax_Cicer arietinum RepID_UPI0006410C72	AT5G11350.1	DNAse I-like superfamily protein	Medtr1g011720.1	carbon catabolite repressor-like protein
Ca13765	Ca4	39382266	39387929	1.17989	1.64794	5.58214	1.05745e-05	0.000176377	3.43077	PREDICTED: GTP-binding protein ERG n_1 Tax_Cicer arietinum RepID_UPI00032AC87B	AT1G30960.1	GTP-binding family protein	Medtr5g020440.1	GTP-binding ERG-like protein
Ca13803	Ca4	39870998	39874670	0.222	7.22784	4.89235	5.86359e-05	0.000616383	1.50342	Chaperone dnaJ-like protein n_2 Tax_Papilionoideae RepID_A0A072VK52_MEDTR	AT5G06130.1	chaperone protein dnaJ-related	Medtr1g059670.1	chaperone dnaJ-like protein
Ca13836	Ca4	40521167	40524950	0.35984	5.52085	4.75933	8.18288e-05	0.000775447	1.17461	S-adenosylmethionine synthase n_3 Tax_fabids RepID_A0A072VVP7_MEDTR	AT2G36880.2	methionine adenosyltransferase 3	Medtr1g063060.5	S-adenosylmethionine synthase-like protein
Ca13846	Ca4	40638649	40642737	-0.488847	3.42354	-5.53016	1.20171e-05	0.000192866	3.16066	PREDICTED: protein SUPPRESSOR OF GENE SILENCING 3 n_1 Tax_Cicer arietinum RepID_UPI00032AAA11	AT5G23570.1	XS domain-containing protein / XS zinc finger domain-containing protein-related	Medtr3g098260.1	suppressor OF protein silencing protein
Ca13843	Ca4	40673841	40677730	0.449509	3.96661	5.15966	3.0083e-05	0.000377148	2.19657	PREDICTED: 37S ribosomal protein S9 - mitochondrial n_1 Tax_Cicer arietinum RepID_UPI00032A5C03	AT3G49080.1	Ribosomal protein S5 domain 2-like superfamily protein	Medtr3g078370.1	30S ribosomal protein S9P
Ca13848	Ca4	40696173	40697926	0.452927	3.12251	5.32888	1.97593e-05	0.000277774	2.69451	PREDICTED: tankyrase n_1 Tax_Cicer arietinum RepID_UPI00032A8BC3	AT3G09890.1	Ankyrin repeat family protein	Medtr1g062770.1	ankyrin domain protein
Ca13899	Ca4	41692591	41776299	0.904458	5.23901	6.20542	2.32775e-06	6.43367e-05	4.71171	PREDICTED: DNA-directed RNA polymerase I subunit rpa1-like n_2 Tax_Cicer arietinum RepID_UPI0006411B8F	AT4G23160.1	cysteine-rich RLK (RECEPTOR-like protein kinase) 8	Medtr4g086290.1	DNA-directed RNA polymerase I protein
Ca13919	Ca4	42253429	42277094	1.21177	3.05416	5.71968	7.54714e-06	0.000142492	3.61155	PREDICTED: protein RRP5 homolog n_1 Tax_Cicer arietinum RepID_UPI00032AD0BE	AT3G11964.1	RNA binding;RNA binding	Medtr1g054710.1	pre-rRNA processing protein Rrp5
Ca13983	Ca4	43126532	43131797	0.282869	5.03098	5.12331	3.2934e-05	0.000399465	2.07474	Tyrosine-tRNA ligase-like protein n_5 Tax_Papilionoideae RepID_A0A072VU52_MEDTR	AT2G33840.1	Tyrosyl-tRNA synthetase, class Ib, bacterial/mitochondrial	Medtr1g053270.1	tyrosine-tRNA ligase-like protein
Ca13996	Ca4	43505536	43509689	0.548081	5.0044	5.29197	2.16528e-05	0.00029596	2.49174	PREDICTED: uncharacterized protein LOC101491980 isoform X2 n_1 Tax_Cicer arietinum RepID_UPI000640E4C2	AT5G53420.3	CCT motif family protein	Medtr1g008220.2	CCT motif protein
Ca14045	Ca4	44344096	44349411	-0.612396	4.81278	-6.90661	4.46537e-07	2.22492e-05	6.36304	Transcription initiation factor IIB-2 n_43 Tax_rosids RepID_TF2B2_ARATH	AT3G10330.1	Cyclin-like family protein	Medtr7g091230.1	transcription initiation factor IIB
Ca14090	Ca4	44953127	44980635	-0.643159	2.89567	-4.74242	8.53744e-05	0.000798167	1.27606	PREDICTED: probable sodium/metabolite cotransporter BASS4 - chloroplastic n_2 Tax_Cicer arietinum RepID_UPI00032AA2CC	AT4G23160.1	cysteine-rich RLK (RECEPTOR-like protein kinase) 8	Medtr3g093120.1	SPFH domain/band 7 family protein
Ca14120	Ca4	45575243	45581229	1.32913	2.14015	5.783	6.46564e-06	0.000129102	3.90352	PREDICTED: probable galactinol--sucrose galactosyltransferase 2 isoform X1 n_2 Tax_Cicer arietinum RepID_UPI000641378C	AT3G57520.3	seed imbibition 2	Medtr1g052515.1	galactinol-raffinose galactosyltransferase
Ca14140	Ca4	45952499	45955624	0.818188	0.138339	4.84804	6.55162e-05	0.000669386	1.79427	PREDICTED: guanylate kinase 1-like isoform X1 n_2 Tax_Cicer arietinum RepID_UPI000640BFDD	AT3G57550.1	guanylate kinase	Medtr7g092020.3	guanylate kinase-like protein
Ca14189	Ca4	46853186	46867195	1.28616	2.86641	5.675	8.41946e-06	0.000152578	3.53399	PREDICTED: nucleolar protein 10 n_1 Tax_Cicer arietinum RepID_UPI00032AA99F	AT3G56990.1	embryo sac development arrest 7	Medtr2g081080.1	embryo sac development arrest protein
Ca14198	Ca4	47107173	47121935	0.533113	3.48472	4.84413	6.6162e-05	0.000673734	1.46064	PREDICTED: pre-mRNA-processing ATP-dependent RNA helicase prp5 n_1 Tax_Cicer arietinum RepID_UPI00032AB7F7	ATMG00860.1	DNA/RNA polymerases superfamily protein	Medtr6g045307.1	IPP transferase
Ca14315	Ca4	49779609	49782408	1.5777	0.800769	5.89802	4.8867e-06	0.000108479	4.06215	PREDICTED: BTB/POZ domain-containing protein At3g19850-like n_1 Tax_Cicer arietinum RepID_UPI00032AD29B	AT3G19850.1	Phototropic-responsive NPH3 family protein	Medtr1g035720.1	phototropic-responsive NPH3 family protein
Ca14336	Ca4	49992532	49998562	-0.568185	8.37721	-6.35503	1.62856e-06	5.04226e-05	5.0541	DNA-binding protein SMUBP-2 n_2 Tax_Papilionoideae RepID_A0A072VHR8_MEDTR	AT5G35970.1	P-loop containing nucleoside triphosphate hydrolases superfamily protein	Medtr1g040155.1	DNA-binding protein SMUBP-2
Ca14362	Ca4	50476872	50481387	-1.29347	1.28083	-9.01446	4.57445e-09	1.06009e-06	10.7383	PREDICTED: uncharacterized protein LOC101495207 n_1 Tax_Cicer arietinum RepID_UPI00032A78C7	AT3G52610.1	unknown protein	Medtr1g059760.1	condensation domain protein
Ca14366	Ca4	50510854	50517980	-1.44471	0.0636866	-5.87549	5.16162e-06	0.000111648	4.15157	PREDICTED: 125 kDa kinesin-related protein-like n_1 Tax_Cicer arietinum RepID_UPI00032A5583	AT2G36200.1	P-loop containing nucleoside triphosphate hydrolases superfamily protein	Medtr1g059730.1	125 kDa kinesin-like protein
Ca14392	Ca4	51026252	51029208	0.338434	5.25258	5.96204	4.18391e-06	9.78486e-05	4.12627	PREDICTED: probable xyloglucan endotransglucosylase/hydrolase protein 28 n_2 Tax_Cicer arietinum RepID_UPI00032ABB5E	AT1G14720.1	xyloglucan endotransglucosylase/hydrolase 28	Medtr1g033420.1	xyloglucan endotransglucosylase/hydrolase family protein
Ca14460	Ca4	52452605	52457680	0.332596	4.5668	5.16675	2.95571e-05	0.000372692	2.19156	Calcium-binding EF-hand protein n_2 Tax_Medicago truncatula RepID_A0A072VJB4_MEDTR	AT3G10300.1	Calcium-binding EF-hand family protein	Medtr1g051895.3	calcium-binding EF-hand protein
Ca14477	Ca4	52735116	52736735	0.719889	2.07364	4.65796	0.000105526	0.000916533	1.25251	PREDICTED: alkane hydroxylase MAH1-like n_3 Tax_Cicer arietinum RepID_UPI00032A6C25	AT2G23180.1	cytochrome P450, family 96, subfamily A, polypeptide 1	Medtr1g050362.1	cytochrome P450 family protein
Ca14488	Ca4	52855892	52857305	-0.601983	0.159592	-4.57271	0.000130714	0.00107112	1.14338	PREDICTED: uncharacterized protein LOC101504964 n_1 Tax_Cicer arietinum RepID_UPI00032A751B	#N/A	#N/A	#N/A
Ca14499	Ca4	52952945	52958822	-0.301775	3.63291	-4.8209	7.01263e-05	0.000696934	1.39785	PREDICTED: tobamovirus multiplication protein 3-like n_1 Tax_Cicer arietinum RepID_UPI00032AD2D6	AT2G02180.1	tobamovirus multiplication protein 3	Medtr1g033830.2	tobamovirus multiplication-like protein
Ca14505	Ca4	53108965	53113957	2.22573	1.04651	6.20495	2.33034e-06	6.43367e-05	4.8911	PREDICTED: putative lysine-specific demethylase JMJD5 n_2 Tax_Cicer arietinum RepID_UPI00032A8E7B	AT3G20810.3	2-oxoglutarate (2OG) and Fe(II)-dependent oxygenase superfamily protein, regulation of circadian rhythm, oxidation-reduction process	Medtr4g066020.1	transcription factor jumonji (JmjC) domain protein
Ca14534	Ca4	53560071	53566159	0.53673	5.62998	4.79272	7.52585e-05	0.000734575	1.2576	PREDICTED: DEAD-box ATP-dependent RNA helicase 56-like isoform X1 n_2 Tax_Cicer arietinum RepID_UPI00032A73E7	AT5G11200.2	DEAD/DEAH box RNA helicase family protein	Medtr3g107420.4	DEAD-box ATP-dependent RNA helicase-like protein
Ca14532	Ca4	53573511	53579337	-0.808147	2.83578	-5.58601	1.04742e-05	0.000175982	3.36471	PREDICTED: tuliposide A-converting enzyme 1 - chloroplastic-like n_1 Tax_Cicer arietinum RepID_UPI0006410880	AT5G16080.1	carboxyesterase 17	Medtr1g012430.1	alpha/beta hydrolase fold protein
Ca14540	Ca4	53626460	53630442	0.660391	4.88053	5.49131	1.32245e-05	0.000206608	2.99302	EIN3-binding F-box-like protein n_2 Tax_Papilionoideae RepID_G7I706_MEDTR	AT2G25490.1	EIN3-binding F box protein 1	Medtr1g012520.1	EIN3-binding F-box-like protein
Ca14558	Ca4	53875267	53877969	0.564957	3.20954	5.32144	2.0127e-05	0.00028049	2.66586	Ribosomal RNA processing brix domain protein n_2 Tax_Medicago truncatula RepID_A0A072VCY8_MEDTR	AT3G15460.1	Ribosomal RNA processing Brix domain protein	Medtr7g069430.1	ribosomal RNA processing brix domain protein
Ca14565	Ca4	53918235	53922978	0.604037	5.47937	5.34046	1.92002e-05	0.000272924	2.61178	PREDICTED: probable receptor-like protein kinase At1g80640 isoform X1 n_1 Tax_Cicer arietinum RepID_UPI00032A92B1	AT5G11020.1	Protein kinase superfamily protein	Medtr1g013040.1	Serine/Threonine kinase family protein
Ca14570	Ca4	53959137	53961772	0.499952	2.19448	5.74697	7.06014e-06	0.000137912	3.8236	PREDICTED: deSI-like protein At4g17486 n_1 Tax_Cicer arietinum RepID_UPI00032A5D4E	AT5G25170.1	PPPDE putative thiol peptidase family protein	Medtr1g013110.1	PPPDE thiol peptidase family protein%2C putative
Ca14582	Ca4	54131398	54132239	2.70844	2.36679	5.83593	5.68301e-06	0.000119071	4.08093	PREDICTED: early nodulin-like protein 3 n_1 Tax_Cicer arietinum RepID_UPI00032A95A9	AT4G31840.1	early nodulin-like protein 15,electron transfer activity	Medtr3g105930.1	early nodulin-like protein
Ca14607	Ca4	54336610	54337959	-0.417119	6.10918	-4.96476	4.89218e-05	0.000535235	1.68556	PREDICTED: zinc finger protein CONSTANS-LIKE 4-like n_1 Tax_Cicer arietinum RepID_UPI00032A7696	AT3G02380.1	CONSTANS-like 2	Medtr1g013450.1	zinc finger constans-like protein
Ca14599	Ca4	54373805	54379026	-0.290608	4.1033	-4.97001	4.82841e-05	0.000530535	1.71343	PREDICTED: ubiquitin carboxyl-terminal hydrolase 18-like n_1 Tax_Cicer arietinum RepID_UPI00032A6CE8	AT2G24640.2	ubiquitin-specific protease 19	Medtr1g014680.1	ubiquitin carboxy-terminal hydrolase
Ca14611	Ca4	54412566	54417529	-0.644528	7.04211	-6.76406	6.21626e-07	2.70886e-05	6.02815	PREDICTED: uncharacterized protein LOC101514791 n_1 Tax_Cicer arietinum RepID_UPI00032AA6A4	AT3G43540.2	Protein of unknown function (DUF1350)	Medtr1g014730.2	DUF1350 family protein
Ca14629	Ca4	54609586	54614742	-1.18033	1.29588	-5.4863	1.33887e-05	0.000208321	3.25661	PREDICTED: thermospermine synthase ACAULIS5 n_1 Tax_Cicer arietinum RepID_UPI00032A906C	AT5G19530.1	S-adenosyl-L-methionine-dependent methyltransferases superfamily protein	Medtr1g015300.1	thermospermine synthase ACAULIS protein
Ca14635	Ca4	54782026	54788432	-0.458741	2.17409	-4.8465	6.57703e-05	0.000671384	1.59245	PREDICTED: fatty-acid-binding protein 2 n_1 Tax_Cicer arietinum RepID_UPI00032AA95C	#N/A	#N/A	Medtr1g015700.2	chalcone-flavanone isomerase family protein
Ca14703	Ca4	55385264	55392644	-0.498725	6.20628	-7.5778	9.74128e-08	8.38393e-06	7.87754	PREDICTED: CSC1-like protein RXW8 n_1 Tax_Cicer arietinum RepID_UPI00032ACB16	AT1G58520.1	lipases;hydrolases, acting on ester bonds	Medtr1g017170.1	ERD (early-responsive to dehydration stress) family protein
Ca14700	Ca4	55439740	55442724	0.742007	3.48887	7.86978	5.11695e-08	5.29055e-06	8.55523	PREDICTED: transcription factor bHLH74 isoform X1 n_2 Tax_Cicer arietinum RepID_UPI00032A7A43	AT1G10120.1	basic helix-loop-helix (bHLH) DNA-binding superfamily protein	Medtr1g017350.1	transcription factor
Ca14757	Ca4	56175457	56177470	-1.32164	2.66948	-7.12986	2.67359e-07	1.62272e-05	6.99759	PREDICTED: uncharacterized protein LOC101493639 n_1 Tax_Cicer arietinum RepID_UPI00032A5584	#N/A	#N/A	Medtr1g018810.1	transcription factor-like protein
Ca14793	Ca4	56477877	56491867	1.39912	3.23106	5.36551	1.80451e-05	0.000261116	2.83538	PREDICTED: alpha-amylase-like n_2 Tax_Cicer arietinum RepID_UPI00032AA5DE	AT4G25000.1	alpha-amylase-like	Medtr1g019480.1	alpha amylase domain protein
Ca14798	Ca4	56527726	56533700	-0.636222	2.70983	-6.03471	3.5096e-06	8.57498e-05	4.44708	PREDICTED: phosphatidate phosphatase PAH2 n_1 Tax_Cicer arietinum RepID_UPI00032A6624	AT5G42870.2	phosphatidic acid phosphohydrolase 2	Medtr1g019740.4	phosphatidic acid phosphohydrolase
Ca14810	Ca4	56618564	56627324	-0.312507	4.72884	-5.06219	3.83549e-05	0.000445774	1.92855	Uncharacterized protein n_7 Tax_Papilionoideae RepID_I1M8J6_SOYBN	AT4G23000.1	Calcineurin-like metallo-phosphoesterase superfamily protein	Medtr1g020000.1	calcineurin-like metallo-phosphoesterase superfamily protein
Ca14842	Ca4	57065980	57070146	1.04428	2.31957	7.62549	8.7622e-08	7.79285e-06	8.07992	PREDICTED: methyltransferase-like protein 2 n_1 Tax_Cicer arietinum RepID_UPI00032A82B0	AT1G19340.1	Methyltransferase MT-A70 family protein	Medtr1g021985.1	methyltransferase-like protein
Ca14863	Ca4	57265129	57267425	-1.36051	3.78745	-6.46708	1.24842e-06	4.24191e-05	5.48716	PREDICTED: uncharacterized protein At1g01500-like n_1 Tax_Cicer arietinum RepID_UPI00032A871B	AT1G19400.2	Erythronate-4-phosphate dehydrogenase family protein	Medtr1g022190.3	erythronate-4-phosphate dehydrogenase family protein
Ca14864	Ca4	57278065	57281996	0.789956	4.11999	4.93586	5.25876e-05	0.000565631	1.6454	PREDICTED: S-adenosyl-L-methionine-dependent tRNA 4-demethylwyosine synthase n_1 Tax_Cicer arietinum RepID_UPI00032AAA90	AT1G75200.1	flavodoxin family protein / radical SAM domain-containing protein	Medtr1g022225.1	tRNA wybutosine-synthesizing-like protein
Ca14874	Ca4	57371542	57371693	0.673607	0.536901	4.51052	0.000152808	0.00119795	1.01638	No Hits	#N/A	#N/A	#N/A
Ca15018	Ca4	57570359	57574967	0.440608	4.33139	6.05209	3.36543e-06	8.34267e-05	4.35717	Nucleotide-binding protein n_3 Tax_Papilionoideae RepID_G7I5C2_MEDTR	AT4G28450.1	nucleotide binding;protein binding	Medtr1g022960.1	nucleotide-binding%3B protein-binding protein
Ca15021	Ca4	57620534	57622863	-0.619015	5.51752	-5.00535	4.42025e-05	0.000497116	1.78304	PREDICTED: thioredoxin H-type 1-like n_1 Tax_Cicer arietinum RepID_UPI00032ABB96	#N/A	#N/A	Medtr3g112410.1	thioredoxin H-type 1 protein
Ca14893	Ca4	57628501	57632436	0.480673	5.59135	6.24847	2.09984e-06	5.98084e-05	4.81393	PREDICTED: probable GTP-binding protein OBGC2 n_1 Tax_Cicer arietinum RepID_UPI0006416172	#N/A	#N/A	Medtr1g023160.1	GTP-binding protein Obg2%2C putative
Ca14908	Ca4	57964326	57967421	-0.822353	3.93324	-4.77104	7.9462e-05	0.000760392	1.2067	PREDICTED: HVA22-like protein i n_1 Tax_Cicer arietinum RepID_UPI00032A67AD	AT5G42560.1	Abscisic acid-responsive (TB2/DP1, HVA22) family protein	Medtr1g024930.1	abscisic acid-responsive (TB2/DP1%2C HVA22) family protein
Ca14921	Ca4	58041815	58045920	0.379106	5.55685	4.90832	5.63389e-05	0.000597938	1.54423	PREDICTED: uncharacterized protein LOC101495010 isoform X1 n_2 Tax_Cicer arietinum RepID_UPI00032A74F6	#N/A	#N/A	Medtr1g025180.2	hypothetical protein
Ca14924	Ca4	58152417	58157537	-0.705427	5.12955	-5.69191	8.07796e-06	0.0001485	3.47091	PREDICTED: ABC transporter B family member 13-like n_1 Tax_Cicer arietinum RepID_UPI00032A7882	AT1G27940.1	P-glycoprotein 13	Medtr1g025560.1	ABC transporter B family protein
Ca14953	Ca4	58428705	58433148	-0.949369	4.0591	-6.07342	3.19666e-06	8.02839e-05	4.43503	PREDICTED: probable alpha-amylase 2 isoform X1 n_4 Tax_Cicer arietinum RepID_UPI00032A9ED5	AT1G76130.1	alpha-amylase-like 2	Medtr1g026170.1	alpha amylase domain protein
Ca14957	Ca4	58449538	58455462	0.502091	2.93812	5.25392	2.37973e-05	0.000317055	2.52048	PREDICTED: putative tRNA pseudouridine synthase Pus10 isoform X1 n_1 Tax_Cicer arietinum RepID_UPI00032A8CF0	AT1G20410.1	Pseudouridine synthase family protein	Medtr1g026400.1	tRNA pseudouridine synthase Pus10%2C putative
Ca19291	Ca5	124009	125445	0.663931	3.63705	6.91905	4.33881e-07	2.19017e-05	6.44415	Galactose oxidase/kelch repeat protein n_2 Tax_Papilionoideae RepID_A0A072V0J6_MEDTR	AT1G22040.1	Galactose oxidase/kelch repeat superfamily protein	Medtr3g073640.1	galactose oxidase/kelch repeat protein
Ca19476	Ca5	3000190	3005141	2.01804	0.369729	5.46129	1.42411e-05	0.000218913	3.17311	PREDICTED: DEAD-box ATP-dependent RNA helicase 53-like n_1 Tax_Cicer arietinum RepID_UPI00032A6FC7	AT3G22330.1	putative mitochondrial RNA helicase 2	Medtr3g449250.2	DEAD-box ATP-dependent RNA helicase-like protein
Ca19616	Ca5	4848819	4852685	-0.38198	6.52377	-5.88825	5.00399e-06	0.000109966	3.95139	Glucose-6-phosphate/phosphate-translocator n_7 Tax_Papilionoideae RepID_O64910_PEA	AT5G54800.1	glucose 6-phosphate/phosphate translocator 1	Medtr3g049400.1	glucose-6-phosphate/phosphate translocator-like protein
Ca19636	Ca5	5067125	5071421	0.904683	2.17372	4.87361	6.14528e-05	0.000637992	1.76074	Tryptophan synthase beta type 2 n_8 Tax_Mesangiospermae RepID_G7IXJ6_MEDTR	AT4G27070.1	tryptophan synthase beta-subunit 2	Medtr3g051120.1	tryptophan synthase beta type 2
Ca19637	Ca5	5082940	5083872	-0.871374	6.52888	-8.17903	2.61968e-08	3.45414e-06	9.18647	PREDICTED: fatty acid desaturase 4 - chloroplastic n_1 Tax_Cicer arietinum RepID_UPI00032AC396	AT4G27030.1	fatty acid desaturase A	Medtr3g051220.1	ubiquitin-conjugating enzyme%2C putative
Ca19650	Ca5	5278301	5278603	-0.832879	2.40473	-6.00833	3.74053e-06	8.97673e-05	4.43377	PREDICTED: uncharacterized protein LOC101510482 n_1 Tax_Cicer arietinum RepID_UPI00032ACAE9	#N/A	#N/A	Medtr3g051570.1	DUF4228 domain protein
Ca19658	Ca5	5342763	5346044	0.470598	6.00395	6.03727	3.48794e-06	8.54711e-05	4.30989	Perchloric acid soluble translation inhibitor-like protein n_2 Tax_Papilionoideae RepID_I3SK73_MEDTR	#N/A	#N/A	Medtr3g051740.1	perchloric acid soluble translation inhibitor-like protein
Ca19659	Ca5	5448456	5456348	0.474614	2.48992	5.75971	6.84388e-06	0.000134374	3.81805	PREDICTED: crt homolog 1-like n_1 Tax_Cicer arietinum RepID_UPI00032AA9E0	#N/A	#N/A	Medtr0028s0090.2	CRT (chloroquine-resistance transporter)-like transporter%2C putative
Ca19695	Ca5	5604073	5609738	-0.336731	4.01612	-5.89065	4.97487e-06	0.000109581	3.98481	PREDICTED: uncharacterized protein LOC101489634 isoform X1 n_2 Tax_Cicer arietinum RepID_UPI00032AC67C	AT5G55040.2	DNA-binding bromodomain-containing protein	Medtr3g052530.4	DNA-binding bromodomain protein
Ca19714	Ca5	5699789	5704003	0.624838	4.48165	7.58034	9.68647e-08	8.38393e-06	7.88273	PREDICTED: GDSL esterase/lipase At5g55050-like n_1 Tax_Cicer arietinum RepID_UPI00032AD2B3	AT5G55050.1	GDSL-like Lipase/Acylhydrolase superfamily protein	Medtr3g052490.1	GDSL-like lipase/acylhydrolase
Ca19728	Ca5	5936279	5940401	0.631924	3.92806	5.68677	8.18015e-06	0.00014966	3.48733	PREDICTED: grpE protein homolog - mitochondrial n_1 Tax_Cicer arietinum RepID_UPI00032A57A3	AT4G26780.1	Co-chaperone GrpE family protein	Medtr3g054220.1	co-chaperone GrpE family protein
Ca19792	Ca5	6598812	6601730	0.697164	8.7252	5.37404	1.76682e-05	0.000257122	2.67417	Heat shock protein 90-2 n_220 Tax_Eukaryota RepID_HS902_ARATH	AT5G56000.1	HEAT SHOCK PROTEIN 81.4	Medtr5g096460.1	heat shock protein 81-2
Ca19808	Ca5	6770520	6773033	-0.653992	2.62149	-5.8571	5.39771e-06	0.000114983	4.02438	BTB/POZ domain plant protein n_4 Tax_Papilionoideae RepID_G7IY69_MEDTR	AT1G55760.1	BTB/POZ domain-containing protein	Medtr3g061090.2	BTB/POZ domain plant protein
Ca19806	Ca5	6792152	6793783	0.608689	3.6873	4.86256	6.31772e-05	0.00065034	1.47663	RNA-binding protein pno1 n_1 Tax_Morus notabilis RepID_W9QYK7_9ROSA	AT3G13230.1	RNA-binding KH domain-containing protein	Medtr3g061130.1	RNA-binding pno1-like protein
Ca19816	Ca5	6957070	6960638	1.71112	2.81621	5.69198	8.07659e-06	0.0001485	3.67613	PREDICTED: probable amino acid permease 7 n_1 Tax_Cicer arietinum RepID_UPI00032ABD6C	AT5G23810.1	amino acid permease 7	Medtr3g461480.1	transmembrane amino acid transporter family protein
Ca19833	Ca5	7303314	7305577	0.534775	4.03694	5.30916	2.0749e-05	0.00028694	2.55798	RuvB-like helicase n_6 Tax_Papilionoideae RepID_G7J268_MEDTR	AT5G67630.1	P-loop containing nucleoside triphosphate hydrolases superfamily protein	Medtr3g061640.1	P-loop nucleoside triphosphate hydrolase superfamily protein
Ca19831	Ca5	7351364	7354762	0.580072	3.20331	4.932	5.30979e-05	0.000569917	1.7265	Uncharacterized protein n_3 Tax_Papilionoideae RepID_A0A072V7J0_MEDTR	AT3G54110.1	plant uncoupling mitochondrial protein 1	Medtr3g462140.1	uncoupling protein
Ca19845	Ca5	7506763	7508445	-0.330629	3.95042	-5.2224	2.5736e-05	0.000335577	2.3602	PREDICTED: UPF0503 protein At3g09070 - chloroplastic-like n_1 Tax_Cicer arietinum RepID_UPI00032A8000	AT3G46990.1	Protein of unknown function (DUF740)	Medtr3g462680.1	DUF740 family protein
Ca19878	Ca5	7734821	7736008	-0.609084	2.33332	-5.12728	3.26095e-05	0.000397736	2.32162	PREDICTED: uncharacterized protein LOC101489748 n_1 Tax_Cicer arietinum RepID_UPI00032A814A	AT2G29660.1	zinc finger (C2H2 type) family protein	Medtr3g463270.1	C2H2-like zinc finger protein
Ca19910	Ca5	7956606	7957988	-0.872847	5.48534	-5.24148	2.45443e-05	0.000324695	2.36793	Ammonium transporter n_2 Tax_Papilionoideae RepID_A0A072UXS9_MEDTR	AT1G64780.1	ammonium transporter 1;2	Medtr3g463730.1	ammonium transporter 1 protein
Ca19897	Ca5	8008385	8010600	-0.425639	3.19445	-4.91355	5.56071e-05	0.000592278	1.67338	Uncharacterized protein n_22 Tax_rosids RepID_A0A0S3S6D8_PHAAN	AT5G58740.1	HSP20-like chaperones superfamily protein	Medtr3g463620.1	p23-like NUD (nuclear distribution)-like protein
Ca19935	Ca5	8292356	8295423	-0.939352	5.57965	-6.1276	2.8058e-06	7.38635e-05	4.52433	PREDICTED: jacalin-related lectin 3-like n_1 Tax_Cicer arietinum RepID_UPI00032A603B	AT1G19715.2	Mannose-binding lectin superfamily protein	Medtr3g464370.1	mannose-binding lectin superfamily protein
Ca19939	Ca5	8295777	8299525	-0.553448	7.71134	-5.72251	7.49522e-06	0.000142385	3.54222	NAD(P)H dehydrogenase B2 n_2 Tax_Papilionoideae RepID_A0A072UXK7_MEDTR	AT1G07180.1	alternative NAD(P)H dehydrogenase 1	Medtr3g464380.1	NAD(P)H dehydrogenase B2
Ca19944	Ca5	8515264	8524472	-0.484727	8.53416	-5.69441	8.02868e-06	0.000148143	3.46099	6-phosphofructo-2-kinase/fructose-2 - 6-bisphosphatase n_10 Tax_Phaseoleae RepID_A0A0B2SBR3_GLYSO	AT1G07110.1	fructose-2,6-bisphosphatase	Medtr3g464770.4	fructose-6-phosphate-2-kinase/fructose-2%2C 6-bisphosphatase
Ca19989	Ca5	8664244	8701637	0.472327	6.57324	6.66842	7.77214e-07	3.08927e-05	5.80722	PREDICTED: probable phytol kinase 3 - chloroplastic n_2 Tax_Cicer arietinum RepID_UPI00032A51BB	AT4G23160.1	cysteine-rich RLK (RECEPTOR-like protein kinase) 8	Medtr2g017850.1	hypothetical protein
Ca19998	Ca5	9026174	9031010	0.983715	9.63882	10.5192	2.47205e-10	1.58267e-07	13.7997	Cinnamoyl-CoA reductase-like protein n_3 Tax_Papilionoideae RepID_G7J0Q8_MEDTR	AT5G58490.1	NAD(P)-binding Rossmann-fold superfamily protein	Medtr3g031650.2	cinnamoyl-CoA reductase-like protein
Ca19996	Ca5	9079847	9084277	0.539487	5.47838	5.72453	7.45815e-06	0.000141881	3.55114	Malonyl CoA-acyl carrier transacylase n_2 Tax_Papilionoideae RepID_G7J0N6_MEDTR	AT2G30200.1	catalytics;transferases;[acyl-carrier-protein] S-malonyltransferases;binding	Medtr3g031380.1	malonyl CoA-acyl carrier transacylase
Ca20039	Ca5	9319710	9322667	-1.20081	0.0239815	-5.44703	1.47514e-05	0.000225232	2.98065	PREDICTED: protein NUCLEAR FUSION DEFECTIVE 4-like n_1 Tax_Cicer arietinum RepID_UPI00032A59E0	AT2G30300.1	Major facilitator superfamily protein	Medtr3g466110.1	nodulin-like/MFS transporter
Ca20030	Ca5	9420664	9425453	-0.362155	4.23412	-5.12891	3.24771e-05	0.000396893	2.11234	PREDICTED: phosphatidate cytidylyltransferase 4 - chloroplastic-like n_1 Tax_Cicer arietinum RepID_UPI00032AA633	AT3G60620.1	cytidinediphosphate diacylglycerol synthase 5	Medtr3g466380.2	phosphatidate cytidylyltransferase family protein
Ca20036	Ca5	9443845	9447840	-0.385806	2.69534	-5.12525	3.27744e-05	0.00039889	2.2453	PREDICTED: uncharacterized protein LOC101499274 n_1 Tax_Cicer arietinum RepID_UPI00032AA662	AT5G58370.2	P-loop containing nucleoside triphosphate hydrolases superfamily protein	Medtr3g466440.1	GTP-binding protein EngB%2C putative
Ca20099	Ca5	10197988	10236243	-1.10257	5.42507	-7.46899	1.24187e-07	9.96533e-06	7.63458	PREDICTED: probable LRR receptor-like serine/threonine-protein kinase At1g06840 n_1 Tax_Cicer arietinum RepID_UPI00032A7778	AT4G23160.1	cysteine-rich RLK (RECEPTOR-like protein kinase) 8	Medtr3g062570.2	LRR receptor-like kinase
Ca20124	Ca5	10587432	10590335	0.652065	5.92917	8.95505	5.16319e-09	1.09682e-06	10.8024	Class I glutamine amidotransferase superfamily protein n_2 Tax_Papilionoideae RepID_G7J7W0_MEDTR	AT3G02720.1	Class I glutamine amidotransferase-like superfamily protein	Medtr3g064140.1	class I glutamine amidotransferase superfamily protein
Ca20142	Ca5	10721460	10724266	0.715241	1.77092	7.3993	1.45202e-07	1.1066e-05	7.58868	PREDICTED: peptidyl-prolyl cis-trans isomerase CYP19-4-like n_1 Tax_Cicer arietinum RepID_UPI00032A8A8F	AT5G58710.1	rotamase CYP 7	Medtr3g070500.1	peptidyl-prolyl cis-trans isomerase
Ca20150	Ca5	10820507	10824068	-1.27502	3.69908	-4.74189	8.54866e-05	0.000798728	1.33053	PREDICTED: flavonol synthase/flavanone 3-hydroxylase-like n_1 Tax_Cicer arietinum RepID_UPI00032A8C56	AT3G55970.1	jasmonate-regulated gene 21	Medtr3g070860.1	leucoanthocyanidin dioxygenase-like protein
Ca20144	Ca5	10885468	10886861	0.682245	3.65065	5.00011	4.47854e-05	0.000502562	1.79095	PREDICTED: transcription factor bHLH51 n_1 Tax_Cicer arietinum RepID_UPI00032AA6F5	AT2G40200.1	basic helix-loop-helix (bHLH) DNA-binding superfamily protein	Medtr3g070970.1	transcription factor
Ca20154	Ca5	10957923	10969259	-0.868211	6.87154	-9.15696	3.42791e-09	8.06614e-07	11.2091	UDP-glucose pyrophosphorylase n_3 Tax_Papilionoideae RepID_G7JBW8_MEDTR	AT4G23160.1	cysteine-rich RLK (RECEPTOR-like protein kinase) 8	Medtr3g071440.2	UDP-glucose pyrophosphorylase
Ca20193	Ca5	11237998	11242980	0.313733	6.98273	4.83832	6.71308e-05	0.00067858	1.37191	PREDICTED: biotin carboxyl carrier protein of acetyl-CoA carboxylase - chloroplastic n_1 Tax_Cicer arietinum RepID_UPI00032AB067	#N/A	#N/A	Medtr3g071960.1	biotin/lipoyl attachment domain protein
Ca20214	Ca5	11440870	11445687	-0.433166	6.43974	-7.75887	6.52588e-08	6.35754e-06	8.27844	PREDICTED: uncharacterized protein LOC101490400 n_1 Tax_Cicer arietinum RepID_UPI00032A5A7C	AT3G10970.2	Haloacid dehalogenase-like hydrolase (HAD) superfamily protein	Medtr3g072340.1	haloacid dehalogenase-like hydrolase
Ca20223	Ca5	11502362	11503884	-1.55657	1.665	-7.52698	1.09089e-07	9.01903e-06	7.84814	PREDICTED: uncharacterized protein LOC101491361 n_1 Tax_Cicer arietinum RepID_UPI00032A4D25	AT1G44760.1	Adenine nucleotide alpha hydrolases-like superfamily protein	Medtr3g072390.1	adenine nucleotide alpha hydrolase superfamily protein
Ca20245	Ca5	11809013	11809871	0.417535	9.31799	6.18904	2.42094e-06	6.65975e-05	4.63022	30S ribosomal protein S13 n_2 Tax_Papilionoideae RepID_G7J3M7_MEDTR	AT5G14320.1	Ribosomal protein S13/S18 family	Medtr3g073140.1	30S ribosomal protein S13
Ca20246	Ca5	11876940	11882547	-1.2134	4.29901	-7.13698	2.63049e-07	1.60292e-05	6.9525	Sulfate transporter 2.2-like protein n_3 Tax_Papilionoideae RepID_A0A0K1U4U2_PEA	AT1G77990.1	STAS domain / Sulfate transporter family	Medtr3g073730.1	sulfate/bicarbonate/oxalate exchanger and transporter sat-1
Ca20258	Ca5	11919959	11932915	0.666261	6.39358	7.37082	1.54811e-07	1.16071e-05	7.41627	Uncharacterized protein n_2 Tax_Phaseolus vulgaris RepID_V7ARE3_PHAVU	AT1G36160.2	acetyl-CoA carboxylase 1	Medtr3g073860.1	acetyl-CoA carboxylase
Ca20257	Ca5	11948604	11949764	-0.696168	5.18541	-5.9369	4.44669e-06	0.000102582	4.06494	PREDICTED: uncharacterized protein LOC101511560 n_1 Tax_Cicer arietinum RepID_UPI00032AA8DF	AT1G22160.1	Protein of unknown function (DUF581)	Medtr3g073960.1	DUF581 family protein
Ca20264	Ca5	12130766	12135324	-0.626348	5.24157	-5.59793	1.0172e-05	0.000173143	3.24095	PREDICTED: uncharacterized methyltransferase At1g78140 - chloroplastic n_1 Tax_Cicer arietinum RepID_UPI00032A7D3B	AT1G78140.1	S-adenosyl-L-methionine-dependent methyltransferases superfamily protein	Medtr3g074250.1	S-adenosylmethionine-dependent methyltransferase
Ca20297	Ca5	12600165	12605287	-0.272773	4.07772	-5.76756	6.71382e-06	0.000133015	3.68562	PREDICTED: arginyl-tRNA--protein transferase 2-like n_1 Tax_Cicer arietinum RepID_UPI00032AAE33	AT5G05700.1	arginine-tRNA protein transferase 1	Medtr3g070310.1	arginyl-tRNA-protein transferase
Ca20350	Ca5	13061424	13065137	0.479005	5.41195	6.46627	1.2508e-06	4.24191e-05	5.32981	PREDICTED: translocon-associated protein subunit alpha n_1 Tax_Cicer arietinum RepID_UPI00032A5C0F	AT2G21160.1	Translocon-associated protein (TRAP), alpha subunit	Medtr3g117740.1	translocon-associated protein alpha subunit
Ca20353	Ca5	13095730	13136240	-0.973159	4.03037	-6.86502	4.91659e-07	2.34266e-05	6.2958	PREDICTED: pentatricopeptide repeat-containing protein At3g12770-like n_1 Tax_Cicer arietinum RepID_UPI0006411C88	AT3G12770.1	mitochondrial editing factor 22	Medtr3g117620.1	PPR containing plant-like protein
Ca20376	Ca5	13227338	13233263	0.329364	4.29877	5.04568	3.99679e-05	0.000460323	1.90529	Cytosolic Fe-S cluster assembly factor NARFL-like protein n_4 Tax_Papilionoideae RepID_G7J7R8_MEDTR	AT4G16440.1	ferredoxin hydrogenases	Medtr4g062080.2	cytosolic Fe-S cluster assembly factor NARFL-like protein
Ca20374	Ca5	13265759	13267511	-1.08576	0.69645	-5.25493	2.37378e-05	0.000316539	2.73265	PREDICTED: B-box zinc finger protein 20-like n_1 Tax_Cicer arietinum RepID_UPI00032AC704	AT4G39070.1	B-box zinc finger family protein	Medtr3g117320.1	salt tolerance-like protein
Ca20383	Ca5	13399209	13402936	1.77657	6.27709	9.47711	1.80975e-09	5.42748e-07	11.8405	Glucose-1-phosphate adenylyltransferase n_4 Tax_Papilionoideae RepID_Q43819_PEA	AT2G21590.2	Glucose-1-phosphate adenylyltransferase family protein	Medtr4g070430.3	glucose-1-phosphate adenylyltransferase family protein
Ca20393	Ca5	13521975	13523006	1.22177	1.44263	9.00331	4.67944e-09	1.06382e-06	10.8144	PREDICTED: BURP domain-containing protein 3-like n_2 Tax_Cicer arietinum RepID_UPI00032A7B86	AT1G49320.1	unknown seed protein like 1	Medtr3g116410.1	dehydration-responsive RD22-like protein
Ca20397	Ca5	13541028	13541639	-1.16839	2.16404	-6.09468	3.03708e-06	7.80708e-05	4.67607	BURP domain protein n_1 Tax_Medicago truncatula RepID_G7J6I1_MEDTR	AT1G49320.1	unknown seed protein like 1	Medtr3g116270.1	BURP domain protein
Ca20391	Ca5	13565011	13567252	1.51063	4.89047	7.21251	2.21476e-07	1.43198e-05	7.09377	Polyol/monosaccharide transporter 1 n_3 Tax_Papilionoideae RepID_G7J6H8_MEDTR	AT3G18830.1	polyol/monosaccharide transporter 5	Medtr3g116240.1	polyol/monosaccharide transporter 1
Ca20405	Ca5	13631120	13633718	0.450046	2.8824	5.23329	2.50487e-05	0.000329424	2.50418	PREDICTED: SWI/SNF complex subunit SWI3B n_1 Tax_Cicer arietinum RepID_UPI00032ACC14	AT2G33610.1	switch subunit 3	Medtr3g116120.1	SWI/SNF complex subunit SWI3B-like protein
Ca20426	Ca5	13729471	13732175	0.489671	7.84358	9.34546	2.34965e-09	6.3049e-07	11.5805	PREDICTED: uncharacterized protein LOC101504606 n_1 Tax_Cicer arietinum RepID_UPI000640F064	#N/A	#N/A	Medtr3g115930.1	transmembrane protein%2C putative
Ca20485	Ca5	13861236	14094850	0.751298	7.70186	10.9837	1.06101e-10	1.24832e-07	14.6435	Niemann-Pick C1 protein n_1 Tax_Morus notabilis RepID_W9R4N5_9ROSA	AT5G42310.1	Pentatricopeptide repeat (PPR-like) superfamily protein	Medtr3g115270.1	PPR containing plant-like protein
Ca20492	Ca5	14231902	14242348	1.79255	3.85975	8.67683	9.15852e-09	1.648e-06	10.2721	PREDICTED: probable nucleoredoxin 2 isoform X1 n_2 Tax_Cicer arietinum RepID_UPI000641605A	AT4G31240.2	protein kinase C-like zinc finger protein	Medtr3g114530.1	nucleoredoxin%2C putative
Ca20445	Ca5	14276709	14292756	-1.02843	4.76006	-5.55939	1.11829e-05	0.000183551	3.15796	PREDICTED: CO(2)-response secreted protease-like n_1 Tax_Cicer arietinum RepID_UPI00032AAC36	AT1G20160.2	Subtilisin-like serine endopeptidase family protein	Medtr3g114410.1	subtilisin-like serine protease
Ca20449	Ca5	14332277	14334948	1.21903	2.41855	5.67204	8.48071e-06	0.000153324	3.60636	PREDICTED: prostaglandin E synthase 2-like n_1 Tax_Cicer arietinum RepID_UPI00032A5F5F	AT5G42150.1	Glutathione S-transferase family protein	Medtr3g114070.1	glutathione S-transferase-related protein
Ca20469	Ca5	14556150	14563410	-0.560091	2.85252	-5.66011	8.73251e-06	0.000155547	3.53248	Guanine nucleotide-binding protein beta subunit-like protein n_4 Tax_Papilionoideae RepID_G7J4P6_MEDTR	AT4G29860.1	Transducin/WD40 repeat-like superfamily protein	Medtr3g113190.16	guanine nucleotide-binding protein beta subunit-like protein
Ca20882	Ca5	14696066	14697720	0.552441	7.13384	9.95088	7.20114e-10	2.90083e-07	12.7548	PREDICTED: thioredoxin H-type-like n_1 Tax_Cicer arietinum RepID_UPI00032AB835	AT3G51030.1	thioredoxin H-type 1	Medtr3g112410.1	thioredoxin H-type 1 protein
Ca20868	Ca5	14977203	14979976	-1.00635	1.70191	-4.57914	0.000128619	0.00105765	1.13842	PREDICTED: putative uncharacterized protein DDB_G0290521 n_1 Tax_Cicer arietinum RepID_UPI00032AAC8C	AT4G39250.1	RAD-like 1	Medtr3g111920.1	MYB family transcription factor
Ca20504	Ca5	15001181	15008268	-0.517485	7.29698	-4.93536	5.26538e-05	0.000565946	1.61217	PREDICTED: 5''''-nucleotidase domain-containing protein 4-like n_1 Tax_Cicer arietinum RepID_UPI00032A8AD3	AT1G75210.1	HAD-superfamily hydrolase, subfamily IG, 5'-nucleotidase	Medtr5g082530.1	cytosolic purine 5-nucleotidase
Ca20503	Ca5	15039219	15039985	0.591248	4.99367	5.25013	2.40223e-05	0.000318942	2.3888	PREDICTED: 40S ribosomal protein S3-1-like n_1 Tax_Cicer arietinum RepID_UPI00032AC268	AT2G31610.1	Ribosomal protein S3 family protein	Medtr6g052140.1	40S ribosomal S3-like protein
Ca20497	Ca5	15082134	15087579	-0.681425	5.91248	-6.67908	7.58062e-07	3.05923e-05	5.82869	PREDICTED: J domain-containing protein required for chloroplast accumulation response 1 isoform X1 n_2 Tax_Cicer arietinum RepID_UPI00032A861A	AT1G75100.1	J-domain protein required for chloroplast accumulation response 1	Medtr3g111700.1	heat shock protein-binding protein%2C putative
Ca20508	Ca5	15089447	15094396	1.37198	1.55684	5.58777	1.04291e-05	0.000175695	3.50331	PREDICTED: uncharacterized protein LOC101509847 n_1 Tax_Cicer arietinum RepID_UPI00032A742F	AT1G75090.1	DNA glycosylase superfamily protein	Medtr3g111690.1	DNA-3-methyladenine glycosylase I
Ca20511	Ca5	15095202	15097216	0.589953	3.4258	5.62589	9.49712e-06	0.000164692	3.38473	PREDICTED: protein BRASSINAZOLE-RESISTANT 1 n_1 Tax_Cicer arietinum RepID_UPI00032AC37A	AT1G75080.2	Brassinosteroid signalling positive regulator (BZR1) family protein	Medtr3g111680.1	brassinazole-resistant 1 protein
Ca20513	Ca5	15179686	15182532	0.913091	2.75474	5.82919	5.77709e-06	0.000120219	3.94758	PREDICTED: uncharacterized protein LOC101513176 n_1 Tax_Cicer arietinum RepID_UPI00032AC273	AT1G48460.1	#N/A	Medtr3g111540.1	transmembrane protein%2C putative
Ca20519	Ca5	15193393	15198912	-0.629806	3.773	-7.33818	1.6663e-07	1.20714e-05	7.38027	PREDICTED: wall-associated receptor kinase-like 14 n_1 Tax_Cicer arietinum RepID_UPI00032A8384	AT2G23450.2	Protein kinase superfamily protein	Medtr3g111510.1	wall associated kinase-like protein
Ca20527	Ca5	15462829	15466213	-0.625717	4.82776	-7.68148	7.74045e-08	7.17517e-06	8.10813	PREDICTED: receptor-like protein kinase HSL1 n_1 Tax_Cicer arietinum RepID_UPI00032A72A4	AT5G49660.1	Leucine-rich repeat transmembrane protein kinase family protein	Medtr3g110840.1	LRR receptor-like kinase family protein
Ca20538	Ca5	15507638	15512734	-2.16501	4.68678	-7.29538	1.83544e-07	1.27605e-05	7.32354	Transmembrane amino acid transporter family protein n_3 Tax_Papilionoideae RepID_G7J416_MEDTR	AT5G49630.1	amino acid permease 6, amino acid transmembrane transport	Medtr3g110660.1	transmembrane amino acid transporter family protein
Ca20536	Ca5	15545718	15548037	1.56042	2.78207	6.95537	3.98994e-07	2.09712e-05	6.57627	DUF1005 family protein n_1 Tax_Medicago truncatula RepID_G7J413_MEDTR	AT1G10020.1	Protein of unknown function (DUF1005)	Medtr3g110630.1	DUF1005 family protein
Ca20579	Ca5	15775312	15778650	-0.386056	2.98228	-4.84022	6.68124e-05	0.0006772	1.51798	PREDICTED: oxidation resistance protein 1 n_1 Tax_Cicer arietinum RepID_UPI00032A94E0	#N/A	#N/A	Medtr1g073340.1	oxidation resistance-like protein
Ca20559	Ca5	15868626	15871777	0.486679	2.06829	4.87831	6.07335e-05	0.000632778	1.69033	PREDICTED: uncharacterized protein LOC101495343 isoform X2 n_1 Tax_Cicer arietinum RepID_UPI00032A51AA	AT5G11630.1	#N/A	Medtr3g109720.1	hypothetical protein
Ca20587	Ca5	16022944	16025698	-0.414128	7.25254	-5.67735	8.37128e-06	0.000151885	3.43739	PREDICTED: putative lactoylglutathione lyase isoform X1 n_2 Tax_Cicer arietinum RepID_UPI00032A721A	AT1G67280.2	Glyoxalase/Bleomycin resistance protein/Dioxygenase superfamily protein	Medtr4g039890.1	lactoylglutathione lyase%2C putative
Ca20598	Ca5	16102508	16108141	-1.00595	2.13573	-6.71965	6.89473e-07	2.88128e-05	6.08492	Uncharacterized protein n_2 Tax_Soja RepID_K7KIV6_SOYBN	AT4G29000.1	Tesmin/TSO1-like CXC domain-containing protein	Medtr3g110122.1	tesmin/TSO1-like CXC domain protein
Ca20637	Ca5	16515438	16517830	-0.751198	2.05855	-5.13932	3.16456e-05	0.000388724	2.38684	PREDICTED: putative peptidyl-tRNA hydrolase PTRHD1 n_1 Tax_Cicer arietinum RepID_UPI00032A657F	AT5G10700.1	Peptidyl-tRNA hydrolase II (PTH2) family protein	Medtr3g108900.1	type 2 (PTH2)-like peptidyl-tRNA hydrolase
Ca20646	Ca5	16524604	16525708	-1.48157	2.39778	-7.5111	1.13026e-07	9.24457e-06	7.79864	PREDICTED: F-box protein AFR n_1 Tax_Cicer arietinum RepID_UPI00032A7076	AT2G24540.1	Galactose oxidase/kelch repeat superfamily protein	Medtr3g108860.1	galactose oxidase/kelch repeat protein
Ca20651	Ca5	16582657	16587226	0.275539	5.62425	5.12361	3.29091e-05	0.000399465	2.07591	Putative JUN kinase activation domain binding protein n_26 Tax_Pentapetalae RepID_O81090_MEDSA	AT1G71230.1	COP9-signalosome 5B	Medtr3g108790.1	COP9 signalosome complex subunit 5
Ca20654	Ca5	16650120	16659604	0.921392	3.03659	5.65947	8.74605e-06	0.000155547	3.44078	Protein arginine N-methyltransferase n_2 Tax_Papilionoideae RepID_G7JCB5_MEDTR	AT4G31120.2	SHK1 binding protein 1	Medtr3g108640.1	arginine N-methyltransferase
Ca20652	Ca5	16665085	16667626	0.374051	4.56987	5.19806	2.73413e-05	0.000351416	2.27926	PREDICTED: uncharacterized protein LOC101501291 n_1 Tax_Cicer arietinum RepID_UPI00032A610A	AT4G31130.1	Protein of unknown function (DUF1218)	Medtr3g108630.1	transmembrane protein%2C putative
Ca20670	Ca5	16882580	16886751	-0.516361	4.54708	-6.17428	2.50819e-06	6.78987e-05	4.65083	PREDICTED: E3 ubiquitin-protein ligase At1g63170-like isoform X1 n_2 Tax_Cicer arietinum RepID_UPI00064136B2	AT4G32600.1	RING/U-box superfamily protein	Medtr3g107995.1	zinc finger%2C C3HC4 type (RING finger) protein%2C putative
Ca20696	Ca5	17022441	17033050	0.38219	7.55336	6.15863	2.60422e-06	6.98799e-05	4.59347	PREDICTED: uncharacterized protein LOC100374136 n_1 Tax_Saccoglossus kowalevskii RepID_UPI0003F0C3CE	AT5G55190.1	RAN GTPase 3	Medtr3g107717.1	GTP-binding nuclear Ran-like protein
Ca20697	Ca5	17038679	17041814	-0.470413	3.43231	-6.54149	1.04726e-06	3.76889e-05	5.58164	PREDICTED: uncharacterized protein LOC101515344 isoform X1 n_2 Tax_Cicer arietinum RepID_UPI00032ACFF5	AT4G32440.3	Plant Tudor-like RNA-binding protein	Medtr3g107680.6	agenet domain protein
Ca20712	Ca5	17222550	17224139	-0.647644	3.31764	-5.22982	2.52657e-05	0.000331422	2.45944	PREDICTED: uncharacterized protein LOC101496661 isoform X1 n_3 Tax_Cicer arietinum RepID_UPI00032ACB24	#N/A	#N/A	Medtr3g107310.1	DUF4050 family protein
Ca20729	Ca5	17345894	17346331	0.762009	8.01909	6.37836	1.54071e-06	4.85878e-05	5.10951	PREDICTED: lipid transfer protein EARLI 1-like n_1 Tax_Cicer arietinum RepID_UPI00032ACA94	AT2G45180.1	Bifunctional inhibitor/lipid-transfer protein/seed storage 2S albumin superfamily protein	Medtr3g106740.1	Lipid transfer protein
Ca20737	Ca5	17442619	17446080	-1.17929	3.94614	-6.93012	4.22927e-07	2.16871e-05	6.48859	PREDICTED: homeobox protein knotted-1-like 3 n_1 Tax_Cicer arietinum RepID_UPI00032A77FF	AT5G25220.1	KNOTTED1-like homeobox gene 3	Medtr3g106400.1	class II knotted-like homeobox protein
Ca20752	Ca5	17609989	17614274	0.569749	2.42668	5.32491	1.99547e-05	0.000279271	2.71803	Ribonucleoside-diphosphate reductase n_4 Tax_Papilionoideae RepID_G7LC83_MEDTR	AT2G21790.1	ribonucleotide reductase 1	Medtr8g092510.1	ribonucleoside-diphosphate reductase%2C alpha chain
Ca20768	Ca5	17710487	17715235	-0.707416	2.43281	-6.08741	3.09071e-06	7.88679e-05	4.59345	Phospholipase D3 n_1 Tax_Glycine soja RepID_A0A0B2PH45_GLYSO	#N/A	#N/A	Medtr3g105980.1	phospholipase D Y
Ca20771	Ca5	17778165	17781071	0.592031	1.18358	4.76561	8.05499e-05	0.000767014	1.57276	No Hits	#N/A	#N/A	#N/A
Ca20786	Ca5	17905452	17908977	-0.616222	6.67901	-5.43601	1.51584e-05	0.00022978	2.84927	3-ketoacyl-CoA synthase n_3 Tax_Papilionoideae RepID_G7J960_MEDTR	AT2G26250.1	3-ketoacyl-CoA synthase 10	Medtr3g105550.1	3-ketoacyl-CoA synthase-like protein
Ca20783	Ca5	17944778	17949876	0.474389	7.23272	5.15153	3.0698e-05	0.000379876	2.14443	Eukaryotic translation initiation factor 3 subunit B n_11 Tax_Papilionoideae RepID_V7ATC5_PHAVU	AT5G25780.1	eukaryotic translation initiation factor 3B-2	Medtr3g105430.1	eukaryotic translation initiation factor 3 subunit B
Ca20814	Ca5	18105631	18107101	-0.473031	8.59036	-4.95111	5.06203e-05	0.000550276	1.62547	PREDICTED: NAD(P)H-quinone oxidoreductase subunit U - chloroplastic n_1 Tax_Cicer arietinum RepID_UPI00032A72AB	#N/A	#N/A	Medtr3g104980.1	DnaJ heat shock amine-terminal domain protein%2C putative
Ca20816	Ca5	18162743	18167345	0.955613	2.29972	5.51097	1.25987e-05	0.000199479	3.2161	PREDICTED: probable 28S rRNA (cytosine-C(5))-methyltransferase n_1 Tax_Cicer arietinum RepID_UPI00032A693A	AT5G26180.2	S-adenosyl-L-methionine-dependent methyltransferases superfamily protein	Medtr3g104760.1	NOL1/NOP2/sun family RNA methylase%2C putative
Ca20808	Ca5	18176721	18188232	0.524779	4.75522	5.59637	1.02111e-05	0.000173172	3.2389	PREDICTED: (S)-coclaurine N-methyltransferase-like isoform X1 n_1 Tax_Cicer arietinum RepID_UPI00032A5C35	AT4G33110.2	S-adenosyl-L-methionine-dependent methyltransferases superfamily protein	Medtr3g104740.1	coclaurine N-methyltransferase
Ca20834	Ca5	18351147	18357436	0.367659	7.50916	4.76842	7.99858e-05	0.000763995	1.19342	NADH:ubiquinone oxidoreductase protein n_4 Tax_Papilionoideae RepID_G7J7M2_MEDTR	AT5G11770.1	NADH-ubiquinone oxidoreductase 20 kDa subunit, mitochondrial	Medtr3g104310.1	NADH:ubiquinone oxidoreductase protein
Ca20848	Ca5	18428142	18432849	0.709744	4.20344	7.28668	1.87191e-07	1.28223e-05	7.23591	PREDICTED: protein EARLY FLOWERING 3-like n_1 Tax_Cicer arietinum RepID_UPI00032ABFF8	AT2G25930.1	hydroxyproline-rich glycoprotein family protein	Medtr3g103970.1	early flowering protein
Ca20846	Ca5	18446187	18447485	-1.0242	3.26174	-5.06137	3.84338e-05	0.000446352	1.99441	PREDICTED: zinc finger CCCH domain-containing protein 20-like n_1 Tax_Cicer arietinum RepID_UPI00032A5644	AT2G19810.1	CCCH-type zinc finger family protein	Medtr3g103960.1	zinc finger CCCH domain protein
Ca20854	Ca5	18508842	18514887	0.417989	6.19907	6.0642	3.26857e-06	8.18213e-05	4.37404	Squalene epoxidase n_3 Tax_Papilionoideae RepID_Q8GSM8_MEDTR	AT4G37760.1	squalene epoxidase 3	Medtr6g034955.1	squalene monooxygenase
Ca20852	Ca5	18525785	18528647	0.594268	3.93777	5.2841	2.20799e-05	0.000300188	2.53533	Uncharacterized protein n_2 Tax_Papilionoideae RepID_A0A072V1K1_MEDTR	AT4G07960.1	Cellulose-synthase-like C12	Medtr3g103500.2	xyloglucan glycosyltransferase
Ca20858	Ca5	18704704	18706045	0.935967	1.17439	5.74727	7.05489e-06	0.000137912	3.86408	Uncharacterized protein n_1 Tax_Medicago truncatula RepID_A0A072VCF0_MEDTR	#N/A	#N/A	#N/A
Ca20864	Ca5	18724770	18729175	-0.485024	6.39036	-9.85959	8.58188e-10	3.27493e-07	12.5818	Interferon-related developmental regulator-like protein n_3 Tax_Papilionoideae RepID_A0A072V2D3_MEDTR	AT1G27760.2	interferon-related developmental regulator family protein / IFRD protein family	Medtr3g103090.2	interferon-related developmental regulator-like protein
Ca20908	Ca5	18830575	18833436	-0.450479	3.46113	-5.32138	2.013e-05	0.00028049	2.62635	PREDICTED: uncharacterized protein LOC101504819 n_1 Tax_Cicer arietinum RepID_UPI00032A810B	AT1G27700.1	Syntaxin/t-SNARE family protein	Medtr3g102790.2	syntaxin 6%2C amine-terminal protein
Ca20916	Ca5	18855304	18857585	-1.13401	1.29787	-6.20637	2.32244e-06	6.43367e-05	4.9268	PREDICTED: uncharacterized protein LOC101510935 n_1 Tax_Cicer arietinum RepID_UPI00032AB6B2	AT3G19540.1	Protein of unknown function (DUF620)	Medtr3g102670.1	lipase
Ca20945	Ca5	19165530	19170082	1.17505	4.66895	5.86243	5.32819e-06	0.000114024	3.91406	PREDICTED: bZIP transcription factor TRAB1 n_1 Tax_Cicer arietinum RepID_UPI00032A5408	AT1G45249.2	abscisic acid responsive elements-binding factor 2	Medtr3g101780.2	ABA response element-binding factor
Ca20950	Ca5	19194056	19196355	-0.693633	5.58717	-5.87621	5.15257e-06	0.000111648	3.91905	PREDICTED: thioredoxin-like 4 - chloroplastic n_1 Tax_Cicer arietinum RepID_UPI00032AB17E	AT1G07700.2	Thioredoxin superfamily protein	Medtr3g101740.1	thioredoxin
Ca20956	Ca5	19221882	19225458	-0.456548	4.25076	-4.9469	5.11558e-05	0.000553343	1.65614	PREDICTED: protein TIC 22 - chloroplastic n_1 Tax_Cicer arietinum RepID_UPI00032A7BCE	AT4G33350.1	Tic22-like family protein	Medtr3g101630.3	inner membrane import protein Tic22%2C putative
Ca20952	Ca5	19273324	19277184	-0.41288	4.60636	-6.50026	1.15424e-06	4.02143e-05	5.41737	PREDICTED: uncharacterized protein LOC101493217 n_1 Tax_Cicer arietinum RepID_UPI00032A54BF	AT5G44250.2	Protein of unknown function DUF829, transmembrane 53	Medtr3g101490.2	DUF829 domain protein
Ca20959	Ca5	19317437	19321665	0.368739	4.3558	4.7717	7.93299e-05	0.000760244	1.21694	PREDICTED: polyadenylate-binding protein RBP47C-like n_1 Tax_Cicer arietinum RepID_UPI00032A616A	AT1G47500.1	RNA-binding protein 47C'	Medtr3g101370.2	polyadenylate-binding protein RBP47C
Ca20967	Ca5	19342075	19343004	0.522723	4.41167	4.74803	8.41819e-05	0.000791372	1.15269	PREDICTED: melanoma-associated antigen C1-like n_1 Tax_Cicer arietinum RepID_UPI00032A4FBE	AT2G26530.1	Protein of unknown function (DUF1645)	Medtr3g101320.1	AR781%2C yeast pheromone receptor-like protein
Ca20972	Ca5	19453713	19456829	-0.423004	1.6576	-5.55779	1.1227e-05	0.000183654	3.41582	DNA-directed RNA polymerase subunit n_3 Tax_Papilionoideae RepID_G7JQD3_MEDTR	#N/A	#N/A	Medtr3g102420.1	DNA-directed RNA polymerase subunit
Ca20983	Ca5	19514894	19516789	-0.41352	3.96138	-5.07217	3.74118e-05	0.000438542	2.00058	PREDICTED: cyclin-D4-1-like n_1 Tax_Cicer arietinum RepID_UPI00032A75E5	AT5G65420.1	CYCLIN D4;1	Medtr3g100710.1	carboxy-terminal domain cyclin
Ca20988	Ca5	19565331	19568011	-0.237636	8.02787	-5.21961	2.59155e-05	0.000336769	2.30564	Vf14-3-3c protein n_4 Tax_Papilionoideae RepID_Q9FXL2_VICFA	AT5G10450.2	G-box regulating factor 6	Medtr3g100620.1	general regulatory factor 2
Ca21006	Ca5	19832171	19836410	-0.375824	3.42463	-6.14756	2.67438e-06	7.11384e-05	4.64584	PREDICTED: uncharacterized protein LOC101515774 n_1 Tax_Cicer arietinum RepID_UPI00032ACDCD	AT4G24490.2	RAB geranylgeranyl transferase alpha subunit 1	Medtr3g100110.1	RAB geranylgeranyl transferase alpha protein
Ca21026	Ca5	19973985	19986673	-0.338384	3.38066	-4.68864	9.77064e-05	0.000869151	1.09863	PREDICTED: crt homolog 2 isoform X1 n_3 Tax_Cicer arietinum RepID_UPI00032AC9E5	AT4G23160.1	cysteine-rich RLK (RECEPTOR-like protein kinase) 8	Medtr3g099780.1	CRT (chloroquine-resistance transporter)-like transporter%2C putative
Ca21027	Ca5	20057933	20069709	-0.442767	3.75714	-6.10747	2.94501e-06	7.64875e-05	4.52466	PREDICTED: protein TRANSPARENT TESTA 12-like n_1 Tax_Cicer arietinum RepID_UPI00032A72AE	AT5G44050.1	MATE efflux family protein	Medtr3g099700.1	MATE efflux family protein
Ca21042	Ca5	20231807	20234331	0.885598	2.66722	7.42569	1.36844e-07	1.06787e-05	7.64576	PREDICTED: F-box protein At1g67340 n_1 Tax_Cicer arietinum RepID_UPI00032A66B6	AT1G67340.1	HCP-like superfamily protein with MYND-type zinc finger	Medtr3g099300.2	HCP family protein with MYND-type zinc finger protein
Ca21059	Ca5	20375883	20377239	1.35998	3.25209	6.05929	3.30747e-06	8.25249e-05	4.52133	PREDICTED: HVA22-like protein e isoform X1 n_2 Tax_Cicer arietinum RepID_UPI00032A5CC9	#N/A	#N/A	Medtr3g099010.1	TB2/DP1%2C HVA22 family protein
Ca21070	Ca5	20561142	20568411	0.95221	1.66916	6.68242	7.52164e-07	3.05271e-05	5.99983	PREDICTED: uncharacterized protein LOC101515442 n_1 Tax_Cicer arietinum RepID_UPI00064126FF	AT5G23690.1	Polynucleotide adenylyltransferase family protein	Medtr3g498785.2	tRNA nucleotidyltransferase/poly(A) polymerase
Ca21101	Ca5	20783936	20784704	-0.58376	3.79838	-5.9029	4.82905e-06	0.00010756	4.04037	PREDICTED: uncharacterized protein At4g14100-like n_1 Tax_Cicer arietinum RepID_UPI00032A60AD	AT3G23760.1	#N/A	Medtr3g098490.1	transferring glycosyl group transferase
Ca21294	Ca5	21106546	21110336	-0.350925	5.85771	-5.21161	2.64354e-05	0.000341494	2.29185	Alpha/beta-hydrolase superfamily protein n_10 Tax_Papilionoideae RepID_B7FM37_MEDTR	AT4G24760.1	alpha/beta-Hydrolases superfamily protein	Medtr3g075410.1	alpha/beta-hydrolase superfamily protein
Ca21118	Ca5	21669206	21671039	1.10006	2.58603	5.64845	8.98576e-06	0.000158887	3.56797	PREDICTED: glutaredoxin n_1 Tax_Cicer arietinum RepID_UPI00032AD40E	#N/A	#N/A	Medtr3g077560.1	glutaredoxin C1
Ca21135	Ca5	21800787	21814765	-0.324295	6.3825	-6.27139	1.98791e-06	5.75854e-05	4.8715	Pantothenate kinase n_10 Tax_Papilionoideae RepID_G7J5F4_MEDTR	AT4G32180.3	pantothenate kinase 2	Medtr3g077740.2	pantothenate kinase
Ca21151	Ca5	22052191	22055139	0.749589	2.34625	4.93319	5.29401e-05	0.000568622	1.79423	PREDICTED: uncharacterized protein LOC101500661 n_1 Tax_Cicer arietinum RepID_UPI00032A7C14	AT1G18850.1	#N/A	Medtr3g078030.1	hypothetical protein
Ca21163	Ca5	22241398	22251669	-1.09921	3.42791	-5.71137	7.7022e-06	0.000144546	3.60258	PREDICTED: alpha-N-acetylglucosaminidase-like n_1 Tax_Cicer arietinum RepID_UPI00032AB488	AT5G13690.1	alpha-N-acetylglucosaminidase family / NAGLU family	Medtr3g078410.1	alpha-N-acetylglucosaminidase family protein
Ca21201	Ca5	22508112	22512378	0.511456	3.26765	4.78992	7.57889e-05	0.000735061	1.37522	PREDICTED: flowering time control protein FPA isoform X1 n_2 Tax_Cicer arietinum RepID_UPI00032A953A	AT4G12640.1	RNA recognition motif (RRM)-containing protein	Medtr3g079310.1	RNA recognition motif (RRM) containing protein
Ca21221	Ca5	22691261	22695297	0.351901	5.60663	5.54505	1.15846e-05	0.000188096	3.11282	PREDICTED: uncharacterized protein LOC101494075 n_1 Tax_Cicer arietinum RepID_UPI00032ABF51	AT3G58830.1	haloacid dehalogenase (HAD) superfamily protein	Medtr1g046360.3	haloacid dehalogenase superfamily protein
Ca21223	Ca5	22719358	22722117	-0.432249	1.47416	-5.42187	1.56973e-05	0.000235613	3.10789	PREDICTED: branched-chain-amino-acid aminotransferase 2 - chloroplastic-like n_1 Tax_Cicer arietinum RepID_UPI00032A7F5A	AT1G79830.3	golgin candidate 5	Medtr2g101700.2	coiled-coil vesicle tethering protein%2C putative
Ca21218	Ca5	22757818	22763519	0.801731	6.46837	5.73551	7.26066e-06	0.000139812	3.5795	Glycoside hydrolase family 3 protein n_2 Tax_Papilionoideae RepID_G7J6L9_MEDTR	AT5G20950.2	Glycosyl hydrolase family protein	Medtr3g079750.1	glycoside hydrolase family 3 protein
Ca21260	Ca5	22989950	22992500	0.438095	5.05606	6.83661	5.25139e-07	2.43085e-05	6.19691	Vacuolar protein sorting-associated protein 29 n_125 Tax_Eukaryota RepID_C5XZJ2_SORBI	AT3G47810.3	Calcineurin-like metallo-phosphoesterase superfamily protein	Medtr3g080480.3	vacuolar protein sorting-associated protein
Ca21258	Ca5	23012938	23021679	0.646258	2.15476	5.27381	2.26509e-05	0.000306048	2.65004	PREDICTED: uncharacterized protein LOC101508050 n_1 Tax_Cicer arietinum RepID_UPI00032A5F40	AT2G31340.1	embryo defective 1381	Medtr3g080550.1	embryo defective 1381 protein
Ca21279	Ca5	23101255	23104142	-0.819351	7.56536	-6.17615	2.49697e-06	6.77148e-05	4.63924	PREDICTED: beta-carotene isomerase D27 - chloroplastic n_1 Tax_Cicer arietinum RepID_UPI00032AD2F0	AT1G64680.1	PF13225 - Domain of unknown function (DUF4033) (DUF4033) (1 of 3)	Medtr3g080840.1	D27 family protein%2C putative
Ca21306	Ca5	23191370	23194072	-1.0239	1.91775	-6.63925	8.32205e-07	3.19012e-05	5.90818	PREDICTED: RING-H2 zinc finger protein RHA4a n_1 Tax_Cicer arietinum RepID_UPI00032A9B58	AT4G24015.1	RING/U-box superfamily protein	Medtr3g081030.1	RING-H2 zinc finger protein
Ca21316	Ca5	23197490	23197765	-2.30522	2.39574	-9.70746	1.15218e-09	3.74948e-07	12.2086	PREDICTED: triacylglycerol lipase 2-like n_1 Tax_Cicer arietinum RepID_UPI00064103E9	#N/A	#N/A	Medtr7g081050.1	triacylglycerol lipase-like protein
Ca21308	Ca5	23278293	23279259	0.635295	0.789674	4.69179	9.6936e-05	0.000865016	1.40606	Splicing factor 3B subunit 5/RDS3 complex subunit 10 n_3 Tax_Medicago truncatula RepID_G7IW51_MEDTR	AT4G14342.1	Splicing factor 3B subunit 5/RDS3 complex subunit 10	Medtr3g019310.1	splicing factor 3B subunit 5/RDS3 complex subunit 10
Ca21346	Ca5	23412907	23418730	-1.0735	3.85304	-5.76443	6.76539e-06	0.000133511	3.7262	PREDICTED: subtilisin-like protease SBT5.3 n_1 Tax_Cicer arietinum RepID_UPI00032AAE57	AT2G04160.1	Subtilisin-like serine endopeptidase family protein	Medtr3g082200.2	subtilisin-like serine protease
Ca21362	Ca5	23511371	23513141	1.9446	3.28804	15.4433	9.50015e-14	1.45305e-09	21.3817	PREDICTED: probable E3 ubiquitin-protein ligase XERICO n_1 Tax_Cicer arietinum RepID_UPI00032A5568	AT2G04240.2	RING/U-box superfamily protein	Medtr3g082510.1	RING-H2 zinc finger protein
Ca21360	Ca5	23521825	23524234	1.2523	5.84733	7.43179	1.34983e-07	1.05875e-05	7.54415	B-box type zinc finger protein n_5 Tax_Papilionoideae RepID_G7J8U1_MEDTR	AT5G48250.1	B-box type zinc finger protein with CCT domain	Medtr3g082630.1	B-box type zinc finger protein
Ca21361	Ca5	23575756	23578520	0.307713	5.63711	5.83235	5.73278e-06	0.000119622	3.81334	PREDICTED: uncharacterized protein LOC101499799 n_1 Tax_Cicer arietinum RepID_UPI00032A9E1A	AT2G04360.1	PF13396 - Phospholipase_D-nuclease N-terminal (PLDc_N) (1 of 1)	Medtr3g082680.1	transmembrane protein%2C putative
Ca21369	Ca5	24134663	24138003	0.995953	1.56428	5.13905	3.16672e-05	0.000388724	2.43147	PREDICTED: LOW QUALITY PROTEIN: (RS)-norcoclaurine 6-O-methyltransferase-like n_1 Tax_Cicer arietinum RepID_UPI000640EF0A	AT4G35160.1	O-methyltransferase family protein	Medtr3g083620.1	flavonoid O-methyltransferase-like protein
Ca21372	Ca5	24159799	24163156	0.933992	2.01507	5.26617	2.30847e-05	0.000310521	2.65525	PREDICTED: protein ROOT PRIMORDIUM DEFECTIVE 1 n_1 Tax_Cicer arietinum RepID_UPI00032A770A	AT3G58520.1	Ubiquitin carboxyl-terminal hydrolase family protein	Medtr7g107280.1	plant organelle RNA recognition domain protein
Ca21391	Ca5	24293232	24295188	0.857169	5.64687	5.32568	1.99165e-05	0.000279215	2.57598	PREDICTED: glycine-rich RNA-binding protein 2 - mitochondrial-like n_1 Tax_Cicer arietinum RepID_UPI00032AB59F	#N/A	#N/A	Medtr3g084040.2	RNA-binding (RRM/RBD/RNP motif) family protein
Ca21400	Ca5	24570748	24572330	2.11318	3.76488	5.59202	1.03207e-05	0.000174426	3.37437	Xyloglucan endotransglucosylase/hydrolase n_3 Tax_Papilionoideae RepID_G7JAU8_MEDTR	AT3G23730.1	xyloglucan endotransglucosylase/hydrolase 16,cell wall biogenesis	Medtr3g084630.1	xyloglucan endotransglucosylase/hydrolase family protein
Ca21412	Ca5	24742073	24742782	1.13072	0.903695	7.08647	2.95236e-07	1.70401e-05	6.90457	PREDICTED: uncharacterized protein LOC101503749 isoform X1 n_2 Tax_Cicer arietinum RepID_UPI00032A7213	AT1G27300.1	#N/A	Medtr3g085060.1	hypothetical protein
Ca21418	Ca5	24743858	24745835	0.512963	4.66592	7.10569	2.82536e-07	1.66849e-05	6.81928	Uncharacterized protein n_12 Tax_Papilionoideae RepID_I1LN65_SOYBN	AT1G27310.1	nuclear transport factor 2A	Medtr8g080790.1	nuclear transport factor 2
Ca21419	Ca5	24748124	24754309	0.428112	6.07239	4.90933	5.61973e-05	0.000596901	1.54851	PREDICTED: histidine kinase 3 n_1 Tax_Cicer arietinum RepID_UPI00032AC259	AT1G27320.1	histidine kinase 3	Medtr3g085130.2	cytokinin receptor histidine kinase
Ca21436	Ca5	24792481	24794465	2.64223	0.531719	9.95046	7.20702e-10	2.90083e-07	12.0517	PREDICTED: squamosa promoter-binding-like protein 2 n_1 Tax_Cicer arietinum RepID_UPI00032AB602	AT5G43270.3	squamosa promoter binding protein-like 2, regulation of timing of transition from vegetative to reproductive phase, anther development	Medtr3g085180.1	squamosa promoter-binding-like protein
Ca21444	Ca5	24953780	24956196	-0.689266	6.15225	-7.46028	1.26633e-07	1.00355e-05	7.61596	PREDICTED: F-box/kelch-repeat protein At1g67480-like n_1 Tax_Cicer arietinum RepID_UPI00032A638A	AT1G67480.2	Galactose oxidase/kelch repeat superfamily protein	Medtr3g085570.1	kelch repeat F-box protein
Ca21455	Ca5	24991588	24993321	-0.559829	2.66511	-4.97599	4.75674e-05	0.000524545	1.93315	PREDICTED: OTU domain-containing protein At3g57810-like n_1 Tax_Cicer arietinum RepID_UPI00032ACB6F	#N/A	#N/A	Medtr1g052405.2	OTU-like cysteine protease
Ca21456	Ca5	25072908	25076758	0.370409	6.94834	4.96477	4.89208e-05	0.000535235	1.68536	3-ketoacyl-(Acyl-carrier) reductase n_1 Tax_Medicago truncatula RepID_G7JC28_MEDTR	AT1G24360.1	NAD(P)-binding Rossmann-fold superfamily protein	Medtr3g085740.1	3-ketoacyl-(acyl-carrier) reductase
Ca21467	Ca5	25145913	25155811	1.03412	1.41164	4.77117	7.94361e-05	0.000760392	1.58046	Uncharacterized protein n_2 Tax_Papilionoideae RepID_G7J2I3_MEDTR	AT1G67690.1	Zincin-like metalloproteases family protein	Medtr3g086000.1	zincin-like metalloprotease family protein
Ca21471	Ca5	25175885	25177041	-0.782608	7.16418	-8.02211	3.67364e-08	4.24247e-06	8.85089	PREDICTED: small heat shock protein - chloroplastic-like n_1 Tax_Cicer arietinum RepID_UPI00032A5773	#N/A	#N/A	Medtr3g086050.1	localized small heat shock protein
Ca21497	Ca5	25246060	25247727	-0.477026	2.9502	-5.03652	4.08933e-05	0.000468161	1.99602	PREDICTED: very-long-chain 3-oxoacyl-CoA reductase 1-like n_1 Tax_Cicer arietinum RepID_UPI00032A59D7	AT1G67730.1	beta-ketoacyl reductase 1	Medtr3g086190.1	enoyl-(acyl carrier) reductase
Ca21482	Ca5	25329707	25332597	0.50869	3.36445	4.6501	0.000107631	0.000931114	1.00585	PREDICTED: nitronate monooxygenase n_1 Tax_Cicer arietinum RepID_UPI00032AA28C	AT5G64250.1	Aldolase-type TIM barrel family protein	Medtr3g069190.2	2-nitropropane dioxygenase-like protein
Ca21514	Ca5	25476646	25477374	-0.731596	5.93529	-5.16761	2.94938e-05	0.000372278	2.18792	PREDICTED: uncharacterized protein LOC101511998 n_1 Tax_Cicer arietinum RepID_UPI00032AC0E2	#N/A	#N/A	Medtr3g086640.1	hypothetical protein
Ca21534	Ca5	25587974	25590519	-1.20538	4.67097	-6.2468	2.10823e-06	5.99356e-05	4.82722	Serine/Threonine-kinase SAPK1-like protein n_3 Tax_Papilionoideae RepID_A0A072V0R0_MEDTR	AT1G78290.3	Protein kinase superfamily protein	Medtr3g086940.1	Serine/Threonine-kinase SAPK1-like protein
Ca21545	Ca5	25830713	25833069	-1.9152	1.35305	-10.7825	1.52591e-10	1.43532e-07	13.7134	PREDICTED: probable trehalose-phosphate phosphatase J n_1 Tax_Cicer arietinum RepID_UPI00032AA790	AT5G65140.2	Haloacid dehalogenase-like hydrolase (HAD) superfamily protein	Medtr8g090330.2	trehalose-phosphate phosphatase
Ca21551	Ca5	26042451	26043935	-0.747016	1.54395	-5.2588	2.3511e-05	0.000314612	2.74454	PREDICTED: uncharacterized protein At4g08330 - chloroplastic-like n_1 Tax_Cicer arietinum RepID_UPI00032A92D9	AT4G08330.1	#N/A	Medtr3g088030.1	hypothetical protein
Ca21550	Ca5	26046257	26047916	0.302252	11.7333	5.29834	2.13135e-05	0.000292893	2.3495	Light-harvesting complex I chlorophyll A/B-binding protein n_3 Tax_Papilionoideae RepID_G7J4F9_MEDTR	AT1G44575.1	Chlorophyll A-B binding family protein	Medtr3g088040.1	light-harvesting complex I chlorophyll A/B-binding protein
Ca21564	Ca5	26118300	26120732	1.21406	4.58644	4.83503	6.76876e-05	0.000681574	1.38772	NAC family transcription factor 5 n_2 Tax_Papilionoideae RepID_C7AFG2_CICAR	AT1G01720.1	NAC (No Apical Meristem) domain transcriptional regulator superfamily protein	Medtr3g088110.1	NAC-like transcription factor
Ca21571	Ca5	26276485	26281932	-0.409273	4.2468	-5.22202	2.57606e-05	0.000335611	2.33825	F-box only protein n_2 Tax_Medicago truncatula RepID_B7FL96_MEDTR	AT1G21760.1	F-box protein 7	Medtr3g088580.2	F-box only protein
Ca21586	Ca5	26528349	26533105	0.262951	6.60809	4.9476	5.1066e-05	0.000553154	1.64435	PREDICTED: uncharacterized protein LOC101502256 n_1 Tax_Cicer arietinum RepID_UPI00032A90C6	AT1G21600.2	plastid transcriptionally active 6	Medtr3g088605.1	plastid transcriptionally active protein
Ca21597	Ca5	26591912	26595272	-0.753989	3.21111	-7.88542	4.94511e-08	5.29055e-06	8.61989	PREDICTED: probable receptor-like serine/threonine-protein kinase At5g57670 n_1 Tax_Cicer arietinum RepID_UPI00032ACD6D	AT1G77280.1	Protein kinase protein with adenine nucleotide alpha hydrolases-like domain	Medtr1g029690.1	adenine nucleotide alpha hydrolase-like domain kinase
Ca21593	Ca5	26596248	26597687	-0.530102	7.75387	-5.9819	3.98745e-06	9.36836e-05	4.17206	NAD(P)H-quinone oxidoreductase subunit M n_2 Tax_Papilionoideae RepID_A0A072VB39_MEDTR	AT4G37925.1	subunit NDH-M of NAD(P)H:plastoquinone dehydrogenase complex	Medtr3g088645.1	NAD(P)H-quinone oxidoreductase subunit M
Ca21603	Ca5	26709967	26712220	-0.641104	6.71389	-6.36334	1.59671e-06	4.98402e-05	5.08976	PREDICTED: protein STAY-GREEN LIKE - chloroplastic n_1 Tax_Cicer arietinum RepID_UPI00032A847C	AT1G44000.1	PTHR31750:SF2 - PROTEIN STAY-GREEN LIKE, CHLOROPLASTIC (1 of 1)	Medtr3g088795.1	staygreen protein
Ca21657	Ca5	27116006	27124450	-0.495055	2.82626	-6.43304	1.3532e-06	4.47552e-05	5.38396	Uncharacterized protein n_6 Tax_Papilionoideae RepID_A0A0S3RDX3_PHAAN	AT1G79740.1	hAT transposon superfamily	#N/A
Ca21660	Ca5	27210391	27215023	-0.683091	7.25734	-6.61254	8.86043e-07	3.32974e-05	5.6746	PREDICTED: RNA polymerase sigma factor sigE - chloroplastic/mitochondrial n_1 Tax_Cicer arietinum RepID_UPI00032AAD6D	AT5G24120.1	sigma factor E	Medtr3g090900.3	RNA polymerase sigma factor
Ca21682	Ca5	27332144	27336717	0.702374	5.58138	6.21495	2.27521e-06	6.37342e-05	4.734	Spermine/spermidine synthase n_1 Tax_Medicago truncatula RepID_G7J6T4_MEDTR	AT5G53120.5	spermidine synthase 3	Medtr3g091090.2	spermine/spermidine synthase
Ca21705	Ca5	27607858	27611691	-0.677893	2.95986	-6.42532	1.37819e-06	4.52347e-05	5.3744	Uncharacterized protein n_9 Tax_Phaseoleae RepID_A0A0S3RDY0_PHAAN	AT5G24310.1	ABL interactor-like protein 3	Medtr3g091760.1	ABIL1-like protein
Ca21710	Ca5	27628693	27632938	0.376264	3.78243	5.70891	7.74871e-06	0.000145063	3.56289	PREDICTED: KH domain-containing protein At4g18375 n_1 Tax_Cicer arietinum RepID_UPI00032A73CC	AT5G53060.1	RNA-binding KH domain-containing protein	Medtr3g091800.1	RNA-binding KH domain protein
Ca21703	Ca5	27642048	27645676	-0.578903	7.09247	-8.22101	2.39448e-08	3.28846e-06	9.27618	PREDICTED: protein phosphatase 2C 57 isoform X1 n_1 Tax_Cicer arietinum RepID_UPI00032A98B0	AT4G27800.2	thylakoid-associated phosphatase 38	Medtr3g491830.1	protein phosphatase 2C-like protein
Ca21731	Ca5	27824396	27838870	0.248243	6.02127	5.0077	4.39441e-05	0.000495302	1.79207	PREDICTED: ATPase family AAA domain-containing protein 1-like isoform X1 n_2 Tax_Cicer arietinum RepID_UPI00032A7443	AT4G27680.1	P-loop containing nucleoside triphosphate hydrolases superfamily protein	Medtr3g092080.2	P-loop nucleoside triphosphate hydrolase superfamily protein
Ca21722	Ca5	27846488	27850537	-0.91185	6.48411	-5.3444	1.90139e-05	0.000270528	2.62217	OPT family oligopeptide transporter n_3 Tax_Papilionoideae RepID_G7J868_MEDTR	AT5G53550.2	YELLOW STRIPE like 3	Medtr3g092090.1	OPT family oligopeptide transporter
Ca21729	Ca5	27876978	27881480	0.582293	5.07317	8.06078	3.37891e-08	4.10162e-06	8.93235	PREDICTED: probable 6-phosphogluconolactonase 5 - chloroplastic n_1 Tax_Cicer arietinum RepID_UPI00032AC398	AT5G24400.1	NagB/RpiA/CoA transferase-like superfamily protein	Medtr3g092110.1	glucosamine-6-phosphate isomerase/6-phosphogluconolactonase
Ca21727	Ca5	27886170	27888357	0.523726	5.52577	6.7841	5.93296e-07	2.64561e-05	6.07474	Uncharacterized protein n_31 Tax_Eukaryota RepID_K7KG22_SOYBN	AT3G52590.1	ubiquitin extension protein 1	Medtr3g092130.2	ubiquitin-60S ribosomal L40 fusion protein
Ca21741	Ca5	27890510	27893746	-0.586037	5.56141	-5.08665	3.60853e-05	0.000427104	1.98443	PREDICTED: pyridoxal reductase - chloroplastic n_1 Tax_Cicer arietinum RepID_UPI00032AAF5C	AT5G53580.1	NAD(P)-linked oxidoreductase superfamily protein	Medtr3g092140.1	aldo/keto reductase family oxidoreductase
Ca21783	Ca5	28122285	28124560	0.768893	3.83577	4.81416	7.13211e-05	0.000705667	1.33764	PREDICTED: ribosome production factor 2 homolog n_1 Tax_Cicer arietinum RepID_UPI00032A9B83	AT3G23620.1	Ribosomal RNA processing Brix domain protein	Medtr1g061160.1	ribosome production factor-like protein
Ca21799	Ca5	28308355	28313440	0.68388	4.26039	4.76543	8.05878e-05	0.000767014	1.20352	PREDICTED: stomatin-like protein 2 - mitochondrial n_1 Tax_Cicer arietinum RepID_UPI00032A972B	AT4G27585.1	SPFH/Band 7/PHB domain-containing membrane-associated protein family	Medtr3g093220.1	SPFH domain/band 7 family protein
Ca21836	Ca5	28597454	28599670	0.92046	6.13038	5.35081	1.87141e-05	0.000267256	2.63775	Chalcone-flavonone isomerase family protein n_5 Tax_Papilionoideae RepID_A0A072V0J3_MEDTR	#N/A	#N/A	Medtr3g093980.3	chalcone-flavanone isomerase family protein
Ca21834	Ca5	28630164	28632071	-1.04685	7.60015	-4.82438	6.95176e-05	0.000693405	1.3352	Uncharacterized protein n_2 Tax_Papilionoideae RepID_I3SCS6_MEDTR	AT2G40610.1	expansin A8	Medtr3g094060.1	expansin A10
Ca21837	Ca5	28638939	28640037	-0.546467	8.40368	-4.81979	7.0321e-05	0.000698415	1.31639	PREDICTED: uncharacterized protein LOC101510395 n_1 Tax_Cicer arietinum RepID_UPI00032A8914	#N/A	#N/A	Medtr3g094080.1	hypothetical protein
Ca21842	Ca5	28688007	28692668	-0.367393	5.06201	-4.77013	7.96423e-05	0.000761331	1.20057	PREDICTED: alpha-galactosidase 3 n_1 Tax_Cicer arietinum RepID_UPI00032AA13F	AT3G56310.2	Melibiase family protein	Medtr3g094160.1	alpha-galactosidase-like protein
Ca21846	Ca5	28695467	28699371	0.566786	4.31286	5.54754	1.15139e-05	0.000187146	3.14731	PREDICTED: tRNA (guanine(26)-N(2))-dimethyltransferase n_1 Tax_Cicer arietinum RepID_UPI00032AC0DF	AT3G56330.1	N2,N2-dimethylguanosine tRNA methyltransferase	Medtr3g094190.1	N(2)%2CN(2)-dimethylguanosine tRNA methyltransferase
Ca21862	Ca5	28872506	28874574	0.59765	6.54827	5.04806	3.97314e-05	0.000458303	1.89196	60S ribosomal protein L6 n_1 Tax_Cicer arietinum RepID_Q9M3Z0_CICAR	AT1G74060.1	Ribosomal protein L6 family protein	Medtr3g094570.1	60S ribosomal L6-like protein
Ca21865	Ca5	28883750	28887107	-0.335758	5.81496	-6.70779	7.08848e-07	2.94389e-05	5.89654	Putative uncharacterized protein (Fragment) n_2 Tax_Cicer arietinum RepID_Q9SMK3_CICAR	AT5G09960.1	PF05627 - Cleavage site for pathogenic type III effector avirulence factor Avr (AvrRpt-cleavage) (1 of 11)	Medtr3g094970.1	pathogenic type III effector avirulence factor Avr AvrRpt-cleavage: cleavage site protein
Ca21849	Ca5	28896026	28902334	-0.409167	8.60078	-5.21484	2.62244e-05	0.000339231	2.28198	PREDICTED: ABC transporter F family member 5 n_1 Tax_Cicer arietinum RepID_UPI0006414538	AT5G64840.1	general control non-repressible 5	Medtr3g095010.1	ABC transporter F family protein
Ca21851	Ca5	28906327	28908943	0.890153	1.18335	5.79155	6.33219e-06	0.000126934	3.97299	PREDICTED: programmed cell death protein 2-like n_1 Tax_Cicer arietinum RepID_UPI00032AC0A3	AT5G64830.2	programmed cell death 2 C-terminal domain-containing protein	Medtr3g095020.1	programmed cell death-like protein
Ca21887	Ca5	29113530	29118001	1.33632	1.26708	4.99882	4.493e-05	0.000503815	2.09709	PREDICTED: uncharacterized protein LOC101500766 n_1 Tax_Cicer arietinum RepID_UPI00032A5AFE	AT5G09840.1	Putative endonuclease or glycosyl hydrolase	Medtr3g095410.1	endonuclease or glycosyl hydrolase
Ca21876	Ca5	29257117	29259451	0.451263	5.94375	4.81689	7.0834e-05	0.000702598	1.32003	40S ribosomal protein SA n_4 Tax_Papilionoideae RepID_RSSA_CICAR	AT3G04770.2	40s ribosomal protein SA B	Medtr7g107400.1	40S ribosomal SA-like protein
Ca21898	Ca5	29325399	29337289	0.943962	6.0993	6.52136	1.09815e-06	3.90608e-05	5.46113	PREDICTED: ATP-dependent zinc metalloprotease FtsH n_1 Tax_Cicer arietinum RepID_UPI00032AA583	AT5G64580.1	AAA-type ATPase family protein	Medtr3g096000.1	ATP-dependent zinc metalloprotease FTSH-like protein
Ca21905	Ca5	29572447	29574218	-1.32666	4.35503	-8.21148	2.44379e-08	3.30776e-06	9.27061	PREDICTED: gibberellin 20 oxidase 2-like n_1 Tax_Cicer arietinum RepID_UPI00032AA13D	AT5G51810.1	gibberellin 20 oxidase 2	Medtr3g096500.1	gibberellin 20-oxidase
Ca21943	Ca5	29852712	29857988	-0.612572	7.26626	-5.93972	4.41634e-06	0.000102345	4.07587	CBS/octicosapeptide/phox/Bemp1 (PB1) domain protein n_3 Tax_Papilionoideae RepID_G7J2M9_MEDTR	AT5G50640.1	CBS / octicosapeptide/Phox/Bemp1 (PB1) domains-containing protein	Medtr3g097010.1	CBS/octicosapeptide/phox/Bemp1 (PB1) domain protein
Ca21968	Ca5	29962537	29972831	-0.439401	7.7826	-8.56116	1.16577e-08	1.98117e-06	9.98951	GTP-binding elongation factor Tu family protein n_3 Tax_Papilionoideae RepID_A0A072V0U5_MEDTR	AT5G08650.1	Small GTP-binding protein	Medtr3g097250.1	GTP-binding elongation factor Tu family protein
Ca21951	Ca5	29995843	30000332	0.74198	4.08161	6.91103	4.42e-07	2.22381e-05	6.39773	PREDICTED: target of Myb protein 1-like n_1 Tax_Cicer arietinum RepID_UPI00032A645B	AT5G63640.1	ENTH/VHS/GAT family protein	Medtr3g097280.2	ENTH/VHS/GAT family protein
Ca21984	Ca5	30079733	30092302	1.26511	2.22355	5.26972	2.2882e-05	0.000308445	2.62977	PREDICTED: tetratricopeptide repeat protein 27 homolog n_1 Tax_Cicer arietinum RepID_UPI00032A5DF0	AT5G17270.1	Protein prenylyltransferase superfamily protein	Medtr3g098060.1	protein prenylyltransferase superfamily protein
Ca22048	Ca5	31366345	31370194	1.23141	4.08087	6.40967	1.43031e-06	4.62506e-05	5.21119	PREDICTED: NAP1-related protein 2 n_1 Tax_Cicer arietinum RepID_UPI00032A9B90	AT1G18800.1	NAP1-related protein 2	Medtr3g040400.1	nucleosome/chromatin assembly factor group protein
Ca22056	Ca5	31540413	31542145	2.55426	0.00184332	6.2031	2.34069e-06	6.45059e-05	4.68365	PREDICTED: myb-related protein 306 n_1 Tax_Cicer arietinum RepID_UPI00032AAFA9	AT1G74650.1	myb domain protein 31, response to auxin, cell differentitation	Medtr3g039990.1	R2R3-myb transcription factor
Ca22109	Ca5	32608057	32611638	-0.492781	8.2766	-5.62893	9.42652e-06	0.000163653	3.30536	Squalene/phytoene synthase n_1 Tax_Medicago truncatula RepID_A0A072UW65_MEDTR	AT5G17230.2	PHYTOENE SYNTHASE	Medtr3g450510.1	squalene/phytoene synthase
Ca22195	Ca5	33391967	33393982	0.860439	2.1	5.67403	8.4396e-06	0.000152762	3.61834	PREDICTED: protein DCL - chloroplastic-like n_1 Tax_Cicer arietinum RepID_UPI00032ACC0A	AT5G62440.1	Protein of unknown function (DUF3223)	Medtr3g435580.1	DUF3223 family protein
Ca22208	Ca5	33856654	33860413	-0.461262	4.92094	-8.26724	2.16935e-08	3.16002e-06	9.37421	PREDICTED: uncharacterized protein LOC101494171 n_1 Tax_Cicer arietinum RepID_UPI00032ABDAC	AT1G26580.1	PTHR22970:SF28 - ELM2 DOMAIN-CONTAINING PROTEIN (1 of 3)	Medtr3g023780.3	ATP-binding protein%2C putative
Ca22322	Ca5	36076182	36079195	-1.51801	0.446054	-5.92802	4.54354e-06	0.000103413	3.90695	PREDICTED: transcription factor bHLH130-like n_1 Tax_Cicer arietinum RepID_UPI00032A5879	#N/A	#N/A	Medtr3g027650.2	transcription factor bHLH122-like protein
Ca22363	Ca5	36278832	36289860	-0.409531	6.15661	-5.90685	4.783e-06	0.00010751	3.996	PREDICTED: 5-formyltetrahydrofolate cyclo-ligase - mitochondrial isoform X1 n_3 Tax_Cicer arietinum RepID_UPI0006411E96	#N/A	#N/A	Medtr0168s0080.1	5-formyltetrahydrofolate cyclo-ligase
Ca22416	Ca5	37655943	37659338	-0.481741	2.70796	-4.81071	7.19393e-05	0.000710796	1.50407	PREDICTED: transcription factor GAMYB-like n_1 Tax_Cicer arietinum RepID_UPI00032ABFBF	AT2G32460.2	myb domain protein 101	Medtr3g011610.1	myb transcription factor
Ca22464	Ca5	38559310	38562388	-0.963336	2.87179	-8.25018	2.24979e-08	3.21594e-06	9.39829	PREDICTED: glycerol-3-phosphate acyltransferase 1-like n_1 Tax_Cicer arietinum RepID_UPI00032A6C39	AT1G06520.1	glycerol-3-phosphate acyltransferase 1	Medtr3g048330.1	glycerol-3-phosphate acyltransferase
Ca22462	Ca5	38578430	38581189	-0.586014	3.89564	-6.70485	7.13734e-07	2.95042e-05	5.95976	PREDICTED: cyclic dof factor 3-like n_1 Tax_Cicer arietinum RepID_UPI00032ABD14	AT3G47500.1	cycling DOF factor 3	Medtr3g435480.1	DOF-type zinc finger DNA-binding family protein
Ca22504	Ca5	39453016	39455777	0.543375	3.88633	5.50631	1.27445e-05	0.000201163	3.07497	PREDICTED: NADPH:quinone oxidoreductase n_1 Tax_Cicer arietinum RepID_UPI00032AA638	AT3G27890.1	NADPH:quinone oxidoreductase	Medtr3g019160.1	NADPH:quinone oxidoreductase-like protein
Ca22707	Ca5	43786783	43788017	-0.625726	1.41572	-5.82731	5.80355e-06	0.000120441	4.05713	PREDICTED: putative F-box/FBD/LRR-repeat protein At1g78760 isoform X1 n_1 Tax_Cicer arietinum RepID_UPI00032AA730	#N/A	#N/A	Medtr7g080440.1	cytochrome C biogenesis protein ccsA%2C putative
Ca22719	Ca5	44061035	44062267	-0.914364	3.61004	-4.70523	9.37227e-05	0.000849726	1.1071	Photosystem II CP47 reaction center protein n_2630 Tax_Spermatophyta RepID_PSBB_SPIOL	ATCG00680.1	photosystem II reaction center protein B	Medtr4g051370.1	photosystem II CP47 chlorophyll A apoprotein
Ca22803	Ca5	45396560	45398305	0.999908	0.407861	6.94839	4.05468e-07	2.1166e-05	6.41996	PREDICTED: mediator of RNA polymerase II transcription subunit 36a-like n_1 Tax_Cicer arietinum RepID_UPI00032A95A5	AT5G52470.1	fibrillarin 1	Medtr6g047580.2	mediator of RNA polymerase II transcription subunit 36a
Ca22832	Ca5	46219870	46224887	0.549302	1.05792	5.36282	1.81659e-05	0.000261496	2.96928	PREDICTED: protein N-lysine methyltransferase METTL21A isoform X1 n_2 Tax_Cicer arietinum RepID_UPI00032A68E6	AT2G26810.2	Putative methyltransferase family protein	Medtr3g045720.1	methyltransferase family protein%2C putative
Ca22844	Ca5	46546938	46554048	2.20958	4.05211	9.98008	6.80974e-10	2.90083e-07	12.8164	PREDICTED: protein ZINC INDUCED FACILITATOR-LIKE 1-like isoform X1 n_4 Tax_Cicer arietinum RepID_UPI00032AA24A	#N/A	#N/A	Medtr3g010820.1	zinc induced facilitator-like protein
Ca22947	Ca5	47948580	47949518	-0.849619	5.79319	-7.56533	1.00155e-07	8.50388e-06	7.84977	Nuclear transcription factor Y protein n_2 Tax_Papilionoideae RepID_I3TAX0_MEDTR	AT4G14540.1	nuclear factor Y, subunit B3	Medtr3g058980.1	nuclear transcription factor Y protein
Ca22954	Ca5	48750801	48755130	1.0709	2.13262	8.84915	6.41426e-09	1.24185e-06	10.6184	PREDICTED: DNA-directed RNA polymerases I and III subunit RPAC1-like n_2 Tax_Cicer arietinum RepID_UPI00032A666F	AT1G60620.1	RNA polymerase I subunit 43	Medtr3g060690.1	DNA-directed RNA polymerase
Ca22955	Ca5	48763112	48769647	1.06936	3.97821	7.19154	2.32292e-07	1.47423e-05	7.02553	PREDICTED: probable 28S rRNA (cytosine-C(5))-methyltransferase n_1 Tax_Cicer arietinum RepID_UPI00032A8E78	AT4G26600.1	S-adenosyl-L-methionine-dependent methyltransferases superfamily protein	Medtr3g460700.1	NOL1/NOP2/sun family RNA methylase%2C putative
Ca22973	Ca5	48871007	48871189	-0.349634	4.08028	-4.92208	5.44328e-05	0.000582203	1.60689	No Hits	#N/A	#N/A	#N/A
Ca23033	Ca5	50174262	50177056	0.266024	7.62767	5.30223	2.11088e-05	0.000290722	2.51308	Late embryogenesis abundant protein n_2 Tax_Papilionoideae RepID_A0A072V5S0_MEDTR	AT2G44060.2	Late embryogenesis abundant protein, group 2	Medtr3g045190.3	late embryogenesis abundant protein
Ca23028	Ca5	50256958	50258695	-0.676668	5.17796	-5.06293	3.82842e-05	0.000445571	1.92912	PREDICTED: uncharacterized protein LOC101501147 n_1 Tax_Cicer arietinum RepID_UPI00032A5E75	AT4G29070.2	Phospholipase A2 family protein	Medtr0180s0050.4	phospholipase A2
Ca23061	Ca5	50717125	50720061	2.45608	5.96677	12.9268	3.97184e-12	1.21499e-08	17.8493	PREDICTED: probable folate-biopterin transporter 8 - chloroplastic n_1 Tax_Cicer arietinum RepID_UPI00032AD028	AT2G33280.1	Major facilitator superfamily protein	Medtr3g008470.1	folate/biopterin transporter
Ca23131	Ca5	50837792	50839326	0.416615	3.68265	5.07595	3.70609e-05	0.000436036	2.01235	Uncharacterized protein n_19 Tax_Papilionoideae RepID_I1N067_SOYBN	AT3G13230.1	RNA-binding KH domain-containing protein	Medtr3g061130.1	RNA-binding pno1-like protein
Ca23087	Ca5	51160503	51167654	1.07881	2.14338	7.04732	3.22945e-07	1.80932e-05	6.79762	PREDICTED: probable protein arginine N-methyltransferase 3 n_1 Tax_Cicer arietinum RepID_UPI00032AAE8C	AT3G12270.1	protein arginine methyltransferase 3	Medtr3g013960.1	arginine N-methyltransferase%2C putative
Ca23096	Ca5	51235927	51244152	-0.552748	5.23729	-5.79209	6.32385e-06	0.000126933	3.7154	PREDICTED: transcription factor TGA6 isoform X1 n_5 Tax_Cicer arietinum RepID_UPI00032A8A72	AT3G12250.5	TGACG motif-binding factor 6	Medtr8g040120.2	BZIP family transcription factor
Ca23106	Ca5	51458455	51464313	1.42907	2.34353	6.76659	6.17983e-07	2.70832e-05	6.14078	PREDICTED: thioredoxin-like protein CITRX - chloroplastic n_1 Tax_Cicer arietinum RepID_UPI00032A5DC2	AT3G06730.1	Thioredoxin z	Medtr3g014240.1	thioredoxin
Ca23212	Ca5	53397240	53400607	0.610491	3.50629	5.82443	5.84451e-06	0.0001208	3.82832	PREDICTED: protein EARLY RESPONSIVE TO DEHYDRATION 15-like isoform X1 n_2 Tax_Cicer arietinum RepID_UPI00032A500C	AT2G41430.3	dehydration-induced protein (ERD15)	Medtr3g023110.1	EARLY responsive TO dehydration protein%2C putative
Ca23257	Ca5	54202770	54220619	0.993853	3.71258	5.38803	1.70672e-05	0.000251003	2.73746	1 -4-alpha-glucan-branching enzyme/amyloplastic protein n_2 Tax_Papilionoideae RepID_A0A072UXT6_MEDTR	AT4G23160.1	cysteine-rich RLK (RECEPTOR-like protein kinase) 8	Medtr3g053220.1	1%2C4-alpha-glucan-branching enzyme/amyloplastic protein
Ca23248	Ca5	54372465	54374001	0.622034	6.20488	6.88627	4.68051e-07	2.27988e-05	6.31121	PREDICTED: uncharacterized protein LOC101496735 n_1 Tax_Cicer arietinum RepID_UPI00032AC21C	#N/A	#N/A	Medtr3g053510.1	hypothetical protein
Ca23291	Ca5	54619041	54623579	0.821774	3.04354	5.09999	3.49044e-05	0.000417407	2.17744	PREDICTED: uncharacterized protein LOC101499556 n_1 Tax_Cicer arietinum RepID_UPI00032ACCF2	AT3G20300.1	Protein of unknown function (DUF3537)	Medtr3g054010.1	extracellular ligand-gated ion channel protein
Ca23463	Ca5	58253827	58279606	-0.682827	7.48107	-6.67195	7.70818e-07	3.07824e-05	5.81351	Putative uncharacterized protein n_1 Tax_Medicago truncatula RepID_Q2HW86_MEDTR	AT4G23160.1	cysteine-rich RLK (RECEPTOR-like protein kinase) 8	Medtr2g017850.1	hypothetical protein
Ca23594	Ca5	60567184	60572793	-0.45412	8.47006	-6.60152	9.09276e-07	3.40034e-05	5.63116	Uncharacterized protein n_2 Tax_Papilionoideae RepID_I3SAM5_LOTJA	AT1G06690.1	NAD(P)-linked oxidoreductase superfamily protein	Medtr3g449790.2	aldo/keto reductase family oxidoreductase
Ca23614	Ca5	60607216	60611516	-0.670339	6.80065	-6.93599	4.17235e-07	2.14869e-05	6.4282	PREDICTED: transcription factor PIF4-like isoform X1 n_3 Tax_Cicer arietinum RepID_UPI00032A7F8B	AT3G59060.1	phytochrome interacting factor 3-like 6	Medtr3g449770.1	transcription factor
Ca23626	Ca5	60806411	60812702	-0.39358	3.37315	-4.83235	6.81436e-05	0.000684794	1.47336	O-fucosyltransferase family protein n_3 Tax_Papilionoideae RepID_G7IYD7_MEDTR	AT1G35510.1	O-fucosyltransferase family protein	Medtr3g005340.1	O-fucosyltransferase family protein
Ca23629	Ca5	60814144	60817593	0.576119	4.43936	6.18011	2.47334e-06	6.73121e-05	4.65419	PREDICTED: uncharacterized protein LOC101496104 n_1 Tax_Cicer arietinum RepID_UPI00032A6BEE	AT1G72040.1	P-loop containing nucleoside triphosphate hydrolases superfamily protein	Medtr3g005360.1	deoxyribonucleoside kinase
Ca23716	Ca5	62094764	62097029	-1.49901	0.420711	-4.56186	0.000134323	0.00109122	1.0807	Sugar porter (SP) family MFS transporter n_3 Tax_Papilionoideae RepID_G7IVL1_MEDTR	AT5G61520.2	Major facilitator superfamily protein	Medtr3g008170.1	sugar porter (SP) family MFS transporter
Ca23790	Ca5	62936199	62939662	-0.476634	4.41491	-4.95679	4.99063e-05	0.000544061	1.68045	Glycosyltransferase n_2 Tax_Cicer arietinum RepID_A0A067XT91_CICAR	AT3G16520.3	UDP-glucosyl transferase 88A1	Medtr3g009520.1	UDP-glucosyltransferase%2C putative
Ca23805	Ca5	63147624	63149853	0.700195	4.17991	5.58963	1.03815e-05	0.00017526	3.24635	PREDICTED: GPI-anchored protein LORELEI-like n_1 Tax_Cicer arietinum RepID_UPI00032AB152	AT5G56170.1	LORELEI-LIKE-GPI-ANCHORED PROTEIN 1	Medtr3g010180.1	lorelei-like-GPI-anchored protein
Ca23941	Ca5	64553659	64648791	1.11273	5.78587	9.27862	2.68497e-09	6.84444e-07	11.4512	PREDICTED: ABC transporter C family member 12-like isoform X1 n_4 Tax_Cicer arietinum RepID_UPI000640C2F1	AT4G23160.1	cysteine-rich RLK (RECEPTOR-like protein kinase) 8	Medtr3g011820.1	multidrug resistance protein ABC transporter family protein
Ca23884	Ca5	64824766	64838525	-0.815656	3.56946	-5.94967	4.31114e-06	0.000100364	4.18417	PREDICTED: probable cytochrome P450 4s3 isoform X1 n_1 Tax_Cicer arietinum RepID_UPI00032A8C2A	AT4G23160.1	cysteine-rich RLK (RECEPTOR-like protein kinase) 8	Medtr3g013690.1	hypothetical protein
Ca23880	Ca5	64839511	64844393	0.327942	3.69264	4.81231	7.1653e-05	0.000708425	1.37723	Diphthine synthase-like protein n_2 Tax_Papilionoideae RepID_G7J4Q4_MEDTR	AT4G31790.2	Tetrapyrrole (Corrin/Porphyrin) Methylases	Medtr1g107520.1	diphthine synthase-like protein
Ca23881	Ca5	64860671	64864177	-0.351659	4.02136	-5.64449	9.07346e-06	0.000159947	3.38873	PREDICTED: dr1-associated corepressor homolog isoform X1 n_2 Tax_Cicer arietinum RepID_UPI00032AC911	AT3G12480.1	nuclear factor Y, subunit C11	Medtr3g012030.3	negative cofactor 2 transcriptional co-repressor%2C putative
Ca23984	Ca5	65702341	65788918	-1.3896	5.1142	-5.37194	1.77605e-05	0.000257729	2.69987	PREDICTED: G-type lectin S-receptor-like serine/threonine-protein kinase At4g27290 n_1 Tax_Cicer arietinum RepID_UPI00032A6122	AT4G27290.1	S-locus lectin protein kinase family protein	Medtr3g019420.1	S-locus lectin kinase family protein
Ca23967	Ca5	65876807	65879922	0.384573	5.66027	4.70082	9.47653e-05	0.000855629	1.03103	Nascent polypeptide-associated complex subunit beta n_1 Tax_Lotus japonicus RepID_I3S419_LOTJA	AT1G17880.1	basic transcription factor 3	Medtr3g020660.1	BTF3b-like transcription factor
Ca23968	Ca5	65895282	65898178	-0.732814	4.98981	-6.18508	2.44405e-06	6.68725e-05	4.66651	PREDICTED: xanthoxin dehydrogenase n_1 Tax_Cicer arietinum RepID_UPI00032AAA6B	AT1G52340.1	NAD(P)-binding Rossmann-fold superfamily protein	Medtr3g020670.1	short-chain dehydrogenase/reductase
Ca24013	Ca5	66515872	66519218	1.33336	2.46479	5.50109	1.29093e-05	0.000203336	3.17071	PREDICTED: glycine-rich RNA-binding protein 3 - mitochondrial - partial n_1 Tax_Cicer arietinum RepID_UPI00032AA147	#N/A	#N/A	#N/A
Ca24024	Ca5	66796813	66798594	-0.707773	6.48826	-5.27893	2.23651e-05	0.000303257	2.46282	PREDICTED: thylakoid lumenal 19 kDa protein - chloroplastic n_1 Tax_Cicer arietinum RepID_UPI00032A6B9B	AT3G63540.1	Mog1/PsbP/DUF1795-like photosystem II reaction center PsbP family protein	Medtr3g028150.1	thylakoid lumenal 19 kDa protein
Ca24062	Ca5	67326035	67327175	-0.553545	4.12587	-4.99243	4.56527e-05	0.000509678	1.78444	PREDICTED: pentatricopeptide repeat-containing protein At1g02150-like n_2 Tax_Cicer arietinum RepID_UPI00032A9A79	AT1G02150.1	Tetratricopeptide repeat (TPR)-like superfamily protein	Medtr8g007365.1	PPR containing protein%2C putative
Ca24104	Ca5	67871882	67876035	-0.414857	4.87075	-5.67129	8.49648e-06	0.00015333	3.4228	PREDICTED: F-box protein SKIP23-like n_1 Tax_Cicer arietinum RepID_UPI00032A6E77	AT2G17030.1	F-box family protein with a domain of unknown function (DUF295)	Medtr3g030050.1	F-box SKIP23-like protein
Ca24111	Ca5	67896187	67901965	-0.284408	7.10544	-4.70457	9.38787e-05	0.000850637	1.04116	PsaB RNA-binding protein n_3 Tax_Papilionoideae RepID_G7IWV1_MEDTR	AT3G08010.1	RNA binding	Medtr3g030950.1	PsaB RNA-binding protein
Ca24138	Ca5	68629382	68641069	1.44059	1.3617	7.09136	2.91954e-07	1.70401e-05	6.91394	Polyamine oxidase n_2 Tax_Papilionoideae RepID_G7J0U8_MEDTR	AT5G13700.1	polyamine oxidase 1	Medtr3g033000.1	polyamine oxidase
Ca24159	Ca5	68819192	68825738	-0.586604	5.57706	-5.63269	9.33983e-06	0.000162697	3.32708	PREDICTED: uncharacterized protein LOC101505551 n_1 Tax_Cicer arietinum RepID_UPI00032AA1A2	AT5G12470.1	Protein of unknown function (DUF3411)	Medtr3g033620.1	DUF3411 domain protein
Ca01905	Ca6	609365	609634	1.90632	3.71767	13.8109	1.00666e-12	7.69847e-09	19.061	Uncharacterized protein n_1 Tax_Medicago truncatula RepID_G7JHI6_MEDTR	#N/A	#N/A	Medtr4g083110.1	hypothetical protein
Ca01901	Ca6	630905	646684	-1.50499	2.78116	-9.81124	9.42119e-10	3.27493e-07	12.4095	PREDICTED: probable inositol transporter 2 isoform X1 n_2 Tax_Cicer arietinum RepID_UPI00032AA0BA	AT1G30220.1	inositol transporter 2	Medtr2g049020.1	inositol transporter 4
Ca01907	Ca6	678568	683297	0.832764	4.53704	6.27451	1.97316e-06	5.72666e-05	4.89139	Ornithine aminotransferase n_3 Tax_Papilionoideae RepID_Q8GUA8_MEDTR	AT5G46180.1	ornithine-delta-aminotransferase	#N/A
Ca01894	Ca6	713596	721917	0.751772	2.55866	5.24725	2.41949e-05	0.000320955	2.59688	PREDICTED: peroxisomal (S)-2-hydroxy-acid oxidase GLO1-like n_1 Tax_Cicer arietinum RepID_UPI00032A51C3	AT3G14420.6	Aldolase-type TIM barrel family protein	Medtr2g070420.1	peroxisomal (S)-2-hydroxy-acid oxidase GLO1
Ca01910	Ca6	885910	888498	1.04403	0.932708	6.0607	3.29627e-06	8.23799e-05	4.54571	PREDICTED: adenylate kinase isoenzyme 6 homolog n_2 Tax_Cicer arietinum RepID_UPI00032A4ECA	AT5G60340.1	P-loop containing nucleoside triphosphate hydrolases superfamily protein	Medtr5g087910.3	adenylate kinase%2C putative
Ca01932	Ca6	933553	936728	0.549201	3.3907	5.7302	7.35559e-06	0.00014063	3.6323	PREDICTED: myosin-binding protein 3 n_1 Tax_Cicer arietinum RepID_UPI00032A81E6	AT1G70750.1	Protein of unknown function, DUF593	Medtr5g078300.1	zein-binding protein
Ca01957	Ca6	1264074	1265291	0.84271	2.1549	6.81642	5.50334e-07	2.51264e-05	6.29909	PREDICTED: histone-lysine N-methyltransferase ASHR2 n_1 Tax_Cicer arietinum RepID_UPI00032A6AC7	AT2G19640.2	ASH1-related protein 2	Medtr5g027020.1	histone-lysine N-methyltransferase
Ca01984	Ca6	1282483	1282934	-0.432183	2.57386	-4.62413	0.00011488	0.00097272	1.01197	Peptide transporter 1 n_2 Tax_Papilionoideae RepID_Q7XAC3_VICFA	AT2G02040.1	peptide transporter 2	Medtr3g462710.2	proton-dependent oligopeptide transport family protein
Ca01983	Ca6	1283052	1285929	-0.363518	4.08758	-4.99249	4.56456e-05	0.000509678	1.77072	Peptide transporter 1 n_2 Tax_Papilionoideae RepID_Q7XAC3_VICFA	AT2G02040.1	peptide transporter 2	Medtr7g067010.1	proton-dependent oligopeptide transport family protein
Ca01969	Ca6	1345855	1348092	0.696095	1.59367	6.23433	2.17208e-06	6.1295e-05	4.98627	PREDICTED: putative pentatricopeptide repeat-containing protein At2g02150 n_1 Tax_Cicer arietinum RepID_UPI00032A7566	AT2G02150.1	Tetratricopeptide repeat (TPR)-like superfamily protein	Medtr8g105170.1	PPR containing plant-like protein
Ca02014	Ca6	1716500	1722077	-0.312724	4.91053	-5.25169	2.39298e-05	0.000318266	2.39341	Heavy metal P-type ATPase n_2 Tax_Papilionoideae RepID_A0A072V003_MEDTR	AT5G44790.1	copper-exporting ATPase / responsive-to-antagonist 1 / copper-transporting ATPase (RAN1)	Medtr4g094695.1	heavy metal P-type ATPase
Ca02029	Ca6	1882977	1886288	0.336787	4.74877	4.98915	4.60285e-05	0.00051249	1.74664	Nucleosome/chromatin assembly factor group protein n_12 Tax_Pentapetalae RepID_G7JE05_MEDTR	AT5G58230.1	Transducin/WD40 repeat-like superfamily protein	Medtr4g096880.1	nucleosome/chromatin assembly factor group protein
Ca02038	Ca6	1895089	1897796	0.656326	2.48803	5.50919	1.26542e-05	0.000200083	3.22026	Aspartate carbamoyltransferase 3 - chloroplastic n_4 Tax_Papilionoideae RepID_PYRB3_PEA	AT3G20330.1	PYRIMIDINE B	Medtr4g096900.2	aspartate carbamoyltransferase%2C catalytic chain
Ca02059	Ca6	2001422	2003328	-0.659302	5.0966	-4.80822	7.23898e-05	0.000713864	1.29555	PREDICTED: transcription factor bHLH144-like n_1 Tax_Cicer arietinum RepID_UPI00032AA13A	AT1G29950.2	basic helix-loop-helix (bHLH) DNA-binding superfamily protein	Medtr4g096660.1	transcription factor bHLH144%2C putative
Ca02051	Ca6	2171744	2173882	0.694921	6.18017	6.64245	8.25986e-07	3.19012e-05	5.74524	PREDICTED: uncharacterized protein LOC101499286 n_1 Tax_Cicer arietinum RepID_UPI00032AC564	AT5G61820.1	PF07712 - Stress up-regulated Nod 19 (SURNod19) (1 of 1)	Medtr4g094570.1	stress up-regulated Nod 19 protein
Ca02098	Ca6	2342739	2343752	-1.11463	2.51714	-8.71524	8.45668e-09	1.55837e-06	10.3063	PREDICTED: polygalacturonase inhibitor 2-like n_1 Tax_Cicer arietinum RepID_UPI00032A5AEF	AT5G06870.1	polygalacturonase inhibiting protein 2	Medtr4g094435.1	polygalacturonase inhibitor protein
Ca02115	Ca6	2427247	2430767	1.34507	3.7466	5.57019	1.08897e-05	0.000179868	3.257	60S ribosomal protein L3B n_61 Tax_Mesangiospermae RepID_A0A072UNM0_MEDTR	AT1G43170.4	ribosomal protein 1	Medtr4g094398.1	60S ribosomal protein L3B
Ca02106	Ca6	2464169	2470368	-0.787186	3.35551	-8.69457	8.82733e-09	1.60731e-06	10.3037	PREDICTED: protein FAM135B-like isoform X1 n_4 Tax_Cicer arietinum RepID_UPI00032A6B33	AT1G58350.2	Putative serine esterase family protein	Medtr4g094378.1	serine esterase family protein%2C putative
Ca02105	Ca6	2477710	2478857	-0.978036	1.69396	-7.74578	6.71662e-08	6.46105e-06	8.30172	PREDICTED: flavonoid 3'''' -5''''-methyltransferase-like n_1 Tax_Cicer arietinum RepID_UPI00032A5971	AT1G24735.1	S-adenosyl-L-methionine-dependent methyltransferases superfamily protein	Medtr4g094368.1	caffeoyl-CoA-O-methyltransferase
Ca02128	Ca6	2569510	2572929	-0.259783	4.79422	-4.77474	7.87285e-05	0.000757329	1.21382	Putative uncharacterized protein n_2 Tax_Papilionoideae RepID_B7FHV1_MEDTR	AT3G26420.1	RNA-binding (RRM/RBD/RNP motifs) family protein with retrovirus zinc finger-like domain	#N/A
Ca02120	Ca6	2582049	2585233	0.842591	1.79981	6.83564	5.2632e-07	2.43085e-05	6.33537	Methyltransferase/nucleic acid-binding protein n_3 Tax_Papilionoideae RepID_A0A072UZG5_MEDTR	AT3G26410.1	methyltransferases;nucleic acid binding	Medtr4g094315.1	methyltransferase/nucleic acid-binding protein
Ca02135	Ca6	2644959	2654562	0.352729	5.95914	5.18933	2.7942e-05	0.000357335	2.24009	Loricrin-like protein n_2 Tax_Papilionoideae RepID_A0A072UZF2_MEDTR	AT5G64550.1	loricrin-related	Medtr4g094290.1	loricrin-like protein
Ca02150	Ca6	2727132	2729113	0.430935	5.71747	4.79201	7.53916e-05	0.00073505	1.25659	PREDICTED: uncharacterized protein LOC101491266 n_1 Tax_Cicer arietinum RepID_UPI0006417E22	AT5G10160.1	Thioesterase superfamily protein	Medtr4g094265.1	beta-hydroxyacyl-ACP dehydratase
Ca02137	Ca6	2731521	2734216	0.470352	3.76574	4.92211	5.44282e-05	0.000582203	1.62321	PREDICTED: uncharacterized protein LOC101491587 n_1 Tax_Cicer arietinum RepID_UPI00032AB673	AT5G64090.1	KOG4688 - Putative beta-catenin-Tcf/Lef signaling pathway component DRCTNNB1A (1 of 2)	Medtr4g094262.1	hyccin protein
Ca02139	Ca6	2742380	2745623	0.368797	4.29898	6.68226	7.52449e-07	3.05271e-05	5.8525	Polymerase/histidinol phosphatase-like protein n_2 Tax_Papilionoideae RepID_A0A072UN52_MEDTR	AT2G13840.1	Polymerase/histidinol phosphatase-like	Medtr4g094258.2	polymerase/histidinol phosphatase-like protein
Ca02157	Ca6	2968323	2971671	-0.856566	5.76939	-5.73048	7.35059e-06	0.00014063	3.5662	PREDICTED: ABC transporter G family member 11-like n_1 Tax_Cicer arietinum RepID_UPI00032AA6DA	AT1G17840.1	white-brown complex homolog protein 11	Medtr4g094090.1	white-brown-complex ABC transporter family protein
Ca02173	Ca6	3090273	3109695	-0.466856	5.89862	-6.2636	2.02523e-06	5.82253e-05	4.84974	PREDICTED: protein EXECUTER 1 - chloroplastic n_1 Tax_Cicer arietinum RepID_UPI00032AC315	AT4G33630.2	Protein of unknown function (DUF3506)	Medtr4g093590.1	executer 1
Ca02171	Ca6	3147186	3151483	-0.569441	2.34596	-7.04869	3.21934e-07	1.80932e-05	6.81868	PREDICTED: GATA transcription factor 28-like n_1 Tax_Cicer arietinum RepID_UPI00032A85EC	#N/A	#N/A	Medtr4g093730.1	GATA transcription factor
Ca02221	Ca6	3207738	3214102	0.455082	5.98566	6.66668	7.80394e-07	3.09226e-05	5.80191	Methylmalonate-semialdehyde dehydrogenase n_1 Tax_Medicago truncatula RepID_G7JU35_MEDTR	AT2G14170.2	aldehyde dehydrogenase 6B2	Medtr4g093170.1	methylmalonate-semialdehyde dehydrogenase
Ca02199	Ca6	3299590	3303938	0.741251	7.23915	5.11119	3.39436e-05	0.000407927	2.0422	Heat shock 70 kDa protein - mitochondrial n_14 Tax_Papilionoideae RepID_HSP7M_PEA	AT5G09590.1	mitochondrial HSO70 2	Medtr4g092920.2	heat shock 70 kDa protein
Ca02230	Ca6	3427800	3431147	-1.41478	4.18921	-5.78557	6.42516e-06	0.000128629	3.70914	PREDICTED: branched-chain-amino-acid aminotransferase 6-like n_1 Tax_Cicer arietinum RepID_UPI00032A670F	AT1G50110.1	D-aminoacid aminotransferase-like PLP-dependent enzymes superfamily protein	Medtr4g092590.1	branched-chain amino acid aminotransferase
Ca02245	Ca6	3772559	3781447	-0.43968	4.15069	-5.59541	1.02352e-05	0.000173172	3.26616	PREDICTED: G-type lectin S-receptor-like serine/threonine-protein kinase RKS1 n_1 Tax_Cicer arietinum RepID_UPI00064165CE	AT1G11410.1	S-locus lectin protein kinase family protein	Medtr4g091860.1	G-type lectin S-receptor-like Serine/Threonine-kinase
Ca02261	Ca6	3785086	3801992	-0.552526	4.01509	-6.18618	2.43759e-06	6.68725e-05	4.69976	PREDICTED: uncharacterized protein LOC101504189 n_1 Tax_Cicer arietinum RepID_UPI0006413BCA	AT2G17140.1	Pentatricopeptide repeat (PPR) superfamily protein	Medtr4g091600.1	PPR containing plant-like protein
Ca02307	Ca6	4415555	4422432	0.407679	3.90621	5.17188	2.91821e-05	0.000369486	2.23683	PREDICTED: mitochondrial inner membrane protein OXA1 n_1 Tax_Cicer arietinum RepID_UPI00032A964F	AT5G62050.1	homolog of yeast oxidase assembly 1 (OXA1)	Medtr4g089105.1	60 kDa inner membrane protein
Ca02341	Ca6	4582838	4587239	0.602321	2.8683	8.73039	8.19543e-09	1.52865e-06	10.3825	Uncharacterized protein n_8 Tax_Phaseoleae RepID_I1KLI3_SOYBN	AT3G09010.1	Protein kinase superfamily protein	Medtr2g013210.2	receptor-like kinase
Ca02324	Ca6	4633332	4638834	0.277977	4.62325	5.23912	2.46887e-05	0.000326091	2.3658	Transcription factor n_9 Tax_Papilionoideae RepID_G7J329_MEDTR	AT4G17020.1	transcription factor-related	Medtr3g072660.1	transcription factor
Ca02387	Ca6	5065727	5069244	-0.776668	3.65701	-4.97367	4.78439e-05	0.000526789	1.8249	MACPF domain NSL1-like protein n_2 Tax_Papilionoideae RepID_A0A072UYS7_MEDTR	AT1G28380.1	MAC/Perforin domain-containing protein	Medtr4g088500.1	MACPF domain NSL1-like protein
Ca02413	Ca6	5319823	5353332	1.89605	4.86216	6.75671	6.32364e-07	2.73995e-05	6.02102	PREDICTED: isoflavone 4''''-O-methyltransferase n_1 Tax_Cicer arietinum RepID_UPI00032A4E56	AT4G35150.1	O-methyltransferase family protein	Medtr4g088200.1	isoflavone-7-O-methyltransferase
Ca02407	Ca6	5365652	5367699	3.76713	4.89491	7.1253	2.70155e-07	1.62678e-05	6.89564	Cytochrome P450 n_2 Tax_Cicer arietinum RepID_Q9XGL7_CICAR	AT5G06900.1	cytochrome P450, family 93, subfamily D, polypeptide 1,oxidation-reduction process	Medtr4g088170.1	cytochrome P450 family flavone synthase
Ca02446	Ca6	5619886	5624111	1.4334	2.11163	8.3058	1.99831e-08	2.93886e-06	9.48882	PREDICTED: formin-like protein 2 - partial n_1 Tax_Cicer arietinum RepID_UPI00032AA73F	AT3G25500.1	formin homology 1	Medtr4g087890.1	formin-like 2 domain protein
Ca02465	Ca6	5841192	5859771	0.789011	6.97883	5.09095	3.57002e-05	0.00042394	1.99643	PREDICTED: codeine O-demethylase-like n_2 Tax_Cicer arietinum RepID_UPI0006410ACD	AT3G19010.1	2-oxoglutarate (2OG) and Fe(II)-dependent oxygenase superfamily protein	Medtr4g087110.1	senescence-associated nodulin
Ca02487	Ca6	6021041	6025099	-0.346429	2.84616	-6.44095	1.32807e-06	4.40626e-05	5.3869	PREDICTED: uncharacterized protein LOC101493233 isoform X1 n_2 Tax_Cicer arietinum RepID_UPI00032A7F93	AT1G49590.1	C2H2 and C2HC zinc fingers superfamily protein	Medtr4g086640.1	nucleic acid-binding protein
Ca02490	Ca6	6047920	6052025	0.519168	2.96583	5.63271	9.33949e-06	0.000162697	3.47291	P-loop nucleoside triphosphate hydrolase superfamily protein n_2 Tax_Papilionoideae RepID_G7JMG0_MEDTR	AT4G34420.1	P-loop containing nucleoside triphosphate hydrolases superfamily protein	Medtr4g086580.1	P-loop nucleoside triphosphate hydrolase superfamily protein
Ca02485	Ca6	6057463	6087093	-0.65108	6.86481	-6.33806	1.69571e-06	5.14194e-05	5.02931	PREDICTED: probable carboxylesterase 12 n_1 Tax_Cicer arietinum RepID_UPI00032ACA66	AT3G48690.1	alpha/beta-Hydrolases superfamily protein	Medtr4g086480.1	CXE carboxylesterase
Ca02497	Ca6	6115797	6120346	-0.43132	4.01331	-5.08187	3.65179e-05	0.000431307	2.02603	DUF829 domain protein n_2 Tax_Papilionoideae RepID_G7JME4_MEDTR	AT2G15695.1	Protein of unknown function DUF829, transmembrane 53	Medtr4g086420.1	DUF829 domain protein
Ca02522	Ca6	6178753	6179307	-0.633929	3.56631	-4.68774	9.79279e-05	0.000869807	1.07968	PREDICTED: uncharacterized protein LOC101498518 n_1 Tax_Cicer arietinum RepID_UPI000640CC24	AT2G15680.1	Calcium-binding EF-hand family protein	Medtr4g086260.1	EF hand calcium-binding family protein
Ca02521	Ca6	6246874	6281205	-0.940475	3.22911	-5.86013	5.35804e-06	0.000114457	4.06454	PREDICTED: abscisic acid 8''''-hydroxylase 4-like n_2 Tax_Cicer arietinum RepID_UPI00032AC441	AT3G19270.1	cytochrome P450, family 707, subfamily A, polypeptide 4	Medtr4g086130.1	cytochrome P450 family ABA 8'-hydroxylase
Ca02507	Ca6	6294451	6297435	-0.990084	10.7988	-6.6936	7.32745e-07	2.99661e-05	5.78541	Ferredoxin-nitrite reductase n_2 Tax_Papilionoideae RepID_G7JL79_MEDTR	AT2G15620.1	nitrite reductase 1	Medtr4g086020.1	ferredoxin-nitrite reductase
Ca02503	Ca6	6357829	6361215	0.510562	3.37642	6.34036	1.68643e-06	5.12802e-05	5.09787	PREDICTED: ABSCISIC ACID-INSENSITIVE 5-like protein 5 n_1 Tax_Cicer arietinum RepID_UPI00032A9DCA	AT1G45249.2	abscisic acid responsive elements-binding factor 2	Medtr4g085910.1	ABA response element-binding factor
Ca02524	Ca6	6440561	6441808	-1.36233	3.1387	-6.66478	7.8387e-07	3.0924e-05	5.91135	PREDICTED: U-box domain-containing protein 26 n_1 Tax_Cicer arietinum RepID_UPI00032AC6CC	AT3G19380.1	plant U-box 25	Medtr4g085720.1	plant U-box protein
Ca02540	Ca6	6631239	6637037	-0.845422	5.49424	-9.72781	1.10747e-09	3.68234e-07	12.3288	PREDICTED: uncharacterized protein At4g06744-like n_1 Tax_Cicer arietinum RepID_UPI00032ACB4D	AT4G06744.1	Leucine-rich repeat (LRR) family protein	Medtr4g085480.1	Serine/Threonine kinase%2C plant-type protein%2C putative
Ca02565	Ca6	6805928	6807310	-0.947425	2.50052	-7.88169	4.98554e-08	5.29055e-06	8.62623	PREDICTED: serine carboxypeptidase-like 50 n_1 Tax_Cicer arietinum RepID_UPI00032A694B	AT1G15000.1	serine carboxypeptidase-like 50	Medtr4g084710.1	serine carboxypeptidase-like protein
Ca02561	Ca6	6888160	6888858	1.52322	2.47437	6.65934	7.93923e-07	3.1185e-05	5.94161	Uncharacterized protein n_10 Tax_Papilionoideae RepID_C6T4J1_SOYBN	AT1G23100.1	GroES-like family protein	Medtr3g110030.1	GroES chaperonin
Ca02580	Ca6	6890903	6893574	0.508478	5.72862	7.08946	2.93221e-07	1.70401e-05	6.77757	PREDICTED: mitochondrial import inner membrane translocase subunit TIM17-2-like n_1 Tax_Cicer arietinum RepID_UPI00032AC907	AT2G37410.2	translocase inner membrane subunit 17-2	Medtr6g088745.3	import inner membrane translocase subunit TIM22
Ca02574	Ca6	6898157	6904091	0.488093	3.51336	5.44899	1.46801e-05	0.000224757	2.94857	O-fucosyltransferase family protein n_10 Tax_Papilionoideae RepID_A0A072UNB9_MEDTR	AT1G14970.1	O-fucosyltransferase family protein	Medtr4g084570.1	O-fucosyltransferase family protein
Ca02593	Ca6	7025394	7028262	0.5697	3.01019	5.90591	4.79386e-06	0.00010751	4.08317	RNA polymerase - dimerisation n_2 Tax_Medicago truncatula RepID_Q2MGQ5_MEDTR	AT2G15430.1	DNA-directed RNA polymerase family protein	Medtr4g084150.1	RPB3 DNA-directed RNA polymerase II subunit 3
Ca02598	Ca6	7058325	7061906	-0.564261	7.22309	-5.42433	1.5602e-05	0.000234874	2.81729	Secondary thiamine-phosphate synthase enzyme n_3 Tax_Papilionoideae RepID_Q2MGQ1_MEDTR	AT1G21065.1	2.5.1.3 - Thiamine-phosphate diphosphorylase / TMP pyrophosphorylase (1 of 2)	Medtr4g084120.1	secondary thiamine-phosphate synthase enzyme
Ca02597	Ca6	7083353	7087245	0.326464	3.56244	5.57769	1.06907e-05	0.00017812	3.25292	PREDICTED: GPI mannosyltransferase 2 n_1 Tax_Cicer arietinum RepID_UPI00032A8AAA	AT1G11880.1	transferases, transferring hexosyl groups	Medtr4g084070.2	mannosyltransferase PIG-V
Ca02582	Ca6	7090116	7094401	-0.376634	4.17294	-4.76269	8.11437e-05	0.000770865	1.22188	PREDICTED: uncharacterized protein At4g19900 n_1 Tax_Cicer arietinum RepID_UPI00032ABAAD	AT4G19900.1	alpha 1,4-glycosyltransferase family protein	Medtr4g084060.1	alpha 1%2C4-glycosyltransferase family protein
Ca02611	Ca6	7270613	7273418	-0.717106	2.51454	-6.11355	2.90225e-06	7.58801e-05	4.69036	PREDICTED: putative E3 ubiquitin-protein ligase ARI4 n_1 Tax_Cicer arietinum RepID_UPI00032AAE3A	AT4G19670.2	RING/U-box superfamily protein	Medtr2g028870.1	C6HC-type zinc finger RING/U-box protein
Ca02622	Ca6	7373964	7378200	0.364907	6.10758	4.99389	4.54868e-05	0.000508567	1.75884	PREDICTED: uncharacterized protein LOC101511902 n_1 Tax_Cicer arietinum RepID_UPI00032A9909	AT4G26370.2	antitermination NusB domain-containing protein	Medtr4g083370.1	antitermination NusB domain protein%2C putative
Ca02629	Ca6	7473330	7477122	0.556065	5.48146	4.99791	4.50322e-05	0.000504591	1.76555	PREDICTED: ras GTPase-activating protein-binding protein 2 isoform X1 n_4 Tax_Cicer arietinum RepID_UPI00032AA2D4	AT5G60980.1	Nuclear transport factor 2 (NTF2) family protein with RNA binding (RRM-RBD-RNP motifs) domain	Medtr4g083150.2	ras-GTPase-activating protein-binding protein%2C putative
Ca02657	Ca6	7773795	7776619	-0.918353	4.24995	-8.95883	5.12351e-09	1.09682e-06	10.8279	PREDICTED: cyclic dof factor 1 n_1 Tax_Cicer arietinum RepID_UPI00032A7FDB	AT5G39660.2	cycling DOF factor 2	Medtr4g082060.1	DOF-type zinc finger DNA-binding family protein
Ca02675	Ca6	7863893	7867156	0.709501	1.33411	5.87391	5.18147e-06	0.000111648	4.15067	PREDICTED: endonuclease III homolog 1 - chloroplastic-like isoform X1 n_2 Tax_Cicer arietinum RepID_UPI00032A9F5A	AT1G05900.1	endonuclease III 2	Medtr2g098660.1	EndoIII-related endonuclease
Ca02694	Ca6	8073340	8082360	0.404431	4.60291	6.0863	3.09903e-06	7.88679e-05	4.43555	Protein disulfide-isomerase 5-3 n_3 Tax_Papilionoideae RepID_G7JDV5_MEDTR	AT4G27080.1	PDI-like 5-4	Medtr4g080800.1	protein disulfide-isomerase 5-3
Ca02710	Ca6	8185924	8187310	-1.18442	1.78735	-6.40173	1.45753e-06	4.68338e-05	5.37471	PREDICTED: uncharacterized protein LOC101495900 n_1 Tax_Cicer arietinum RepID_UPI00032A77D6	AT3G58720.1	RING/U-box superfamily protein	Medtr4g080750.1	anaphase-promoting complex subunit 11 RING-H2 finger protein
Ca02707	Ca6	8241250	8243428	0.295314	3.82539	4.7134	9.18204e-05	0.000836945	1.10709	Putative uncharacterized protein n_45 Tax_Pentapetalae RepID_D7T2I1_VITVI	AT3G59810.1	Small nuclear ribonucleoprotein family protein	Medtr4g080300.1	u6 snRNA-associated-like-Smprotein
Ca02790	Ca6	8955817	8956571	-0.595748	5.84298	-4.82904	6.87102e-05	0.00068902	1.34671	PREDICTED: uncharacterized protein LOC101503424 n_1 Tax_Cicer arietinum RepID_UPI00032ACE6D	AT1G78995.1	#N/A	Medtr6g004140.1	hypothetical protein
Ca02789	Ca6	8975459	8978728	0.619779	6.70602	5.93733	4.44202e-06	0.000102582	4.06909	ADP/ATP carrier protein n_4 Tax_Papilionoideae RepID_A0A072UXU6_MEDTR	AT4G28390.1	ADP/ATP carrier 3	Medtr4g078545.1	ADP/ATP carrier protein
Ca02833	Ca6	9227354	9228408	1.24171	1.95419	8.80296	7.05413e-09	1.33201e-06	10.5289	PREDICTED: S-norcoclaurine synthase-like n_1 Tax_Cicer arietinum RepID_UPI00032AAAC8	#N/A	#N/A	Medtr4g478140.1	S-norcoclaurine synthase-like protein
Ca02842	Ca6	9317869	9322075	0.513862	2.54458	5.00672	4.40518e-05	0.000495785	1.94301	PREDICTED: ATPase family AAA domain-containing protein 3-B n_1 Tax_Cicer arietinum RepID_UPI00032A6703	AT3G03060.1	P-loop containing nucleoside triphosphate hydrolases superfamily protein	Medtr4g077880.1	P-loop nucleoside triphosphate hydrolase superfamily protein
Ca02848	Ca6	9363290	9369646	0.388275	5.08196	6.13463	2.75876e-06	7.31287e-05	4.54133	Sugar porter (SP) family MFS transporter n_3 Tax_Papilionoideae RepID_G7JSQ2_MEDTR	AT5G17010.3	Major facilitator superfamily protein	Medtr4g077740.1	sugar porter (SP) family MFS transporter
Ca02864	Ca6	9618168	9622144	-0.913144	1.17091	-5.31743	2.03279e-05	0.000282138	2.86669	PREDICTED: phospholipase A1-Igamma3 - chloroplastic n_1 Tax_Cicer arietinum RepID_UPI00032A5A52	AT1G51440.1	alpha/beta-Hydrolases superfamily protein	Medtr4g077070.1	phospholipase A1
Ca02885	Ca6	9681794	9714869	-0.708675	5.27829	-8.53279	1.23717e-08	2.05679e-06	9.93215	Uncharacterized protein n_2 Tax_Papilionoideae RepID_G7JRM5_MEDTR	AT3G21090.1	ABC-2 type transporter family protein	Medtr4g076970.1	white-brown-complex ABC transporter family protein
Ca02912	Ca6	9992983	9993271	-0.565123	2.49888	-5.12496	3.27987e-05	0.00039889	2.26018	PREDICTED: uncharacterized protein LOC101512969 n_1 Tax_Cicer arietinum RepID_UPI00032A64EF	#N/A	#N/A	#N/A
Ca03012	Ca6	10370896	10374145	0.392239	5.15272	4.87021	6.19787e-05	0.000641818	1.4488	PREDICTED: peter Pan-like protein n_1 Tax_Cicer arietinum RepID_UPI00032A7F78	AT5G61770.3	PETER PAN-like protein	Medtr4g075050.1	peter Pan-like protein
Ca02962	Ca6	10430548	10435237	0.851328	6.87883	5.22502	2.55687e-05	0.000333965	2.32604	PREDICTED: nucleolin 2 isoform X1 n_2 Tax_Cicer arietinum RepID_UPI00032AB468	AT3G18610.1	nucleolin like 2	Medtr4g074930.3	RNA recognition motif%2C a.k.a. RRM%2C RBD protein
Ca02948	Ca6	10592122	10594914	-0.824504	6.4975	-7.63657	8.54955e-08	7.7111e-06	8.009	PREDICTED: uncharacterized protein LOC101505578 n_1 Tax_Cicer arietinum RepID_UPI00032A6754	#N/A	#N/A	Medtr4g074590.1	DUF177 domain protein
Ca02994	Ca6	10832884	10834106	0.712118	5.20402	6.00725	3.75033e-06	8.97673e-05	4.23608	PREDICTED: uncharacterized protein LOC101488662 n_1 Tax_Cicer arietinum RepID_UPI00032AB999	AT4G38710.2	glycine-rich protein	Medtr4g074040.1	plant-specific eukaryotic initiation factor 4B
Ca03003	Ca6	11169286	11170405	-0.462895	3.00362	-5.14412	3.12701e-05	0.000385375	2.27319	PREDICTED: myb-related protein 308 n_1 Tax_Cicer arietinum RepID_UPI00032A5C0B	AT4G38620.1	myb domain protein 4	Medtr4g073420.1	myb transcription factor
Ca03004	Ca6	11173798	11178973	0.245168	8.28112	6.01032	3.72261e-06	8.9665e-05	4.23086	PREDICTED: L-ascorbate peroxidase 3 - peroxisomal n_1 Tax_Cicer arietinum RepID_UPI00032A8B17	AT4G35000.1	ascorbate peroxidase 3	Medtr4g073410.1	L-ascorbate peroxidase
Ca03060	Ca6	11252970	11254606	-1.24911	7.36135	-8.06727	3.33186e-08	4.10144e-06	8.9468	Uncharacterized protein n_2 Tax_Gossypium raimondii RepID_A0A0D2M4Q0_GOSRA	AT1G64230.2	ubiquitin-conjugating enzyme 28	Medtr4g073240.3	ubiquitin-conjugating enzyme E2
Ca03063	Ca6	11277238	11279657	1.5647	1.29133	5.1842	2.83008e-05	0.000361131	2.56402	PREDICTED: WD-40 repeat-containing protein MSI3-like n_1 Tax_Cicer arietinum RepID_UPI00032AC3F3	AT4G35050.1	Transducin family protein / WD-40 repeat family protein	Medtr4g073080.1	nucleosome/chromatin assembly factor group protein
Ca03022	Ca6	11440971	11446253	0.643376	3.55991	5.72847	7.38671e-06	0.000140954	3.65465	PREDICTED: CSC1-like protein At1g69450 n_1 Tax_Cicer arietinum RepID_UPI00032A9FD7	AT1G69450.2	Early-responsive to dehydration stress protein (ERD4)	Medtr5g042560.2	ERD (early-responsive to dehydration stress) family protein
Ca03019	Ca6	11606375	11608246	0.76824	2.02031	5.87381	5.18275e-06	0.000111648	4.11561	PREDICTED: myb-like protein X n_1 Tax_Cicer arietinum RepID_UPI00032A4D6D	AT1G14060.1	GCK domain-containing protein	Medtr4g082300.2	GCK domain protein
Ca03117	Ca6	12380639	12391289	0.615229	7.05764	5.63448	9.29887e-06	0.000162697	3.33156	Translocon at the outer membrane ofs-like protein n_3 Tax_Papilionoideae RepID_G7LE58_MEDTR	AT3G11400.1	eukaryotic translation initiation factor 3G1	Medtr8g107310.1	eukaryotic translation initiation factor 3 subunit G
Ca03128	Ca6	12488669	12490946	0.639126	3.72442	6.4641	1.25725e-06	4.25435e-05	5.38438	PREDICTED: histone H1-like n_1 Tax_Cicer arietinum RepID_UPI00032A8383	#N/A	#N/A	Medtr8g106980.1	linker histone H1 and h5 family protein
Ca03127	Ca6	12550303	12552470	0.487903	7.51609	4.76116	8.14537e-05	0.000773181	1.17281	Guanine nucleotide-binding protein beta subunit-like protein n_7 Tax_Pentapetalae RepID_G7LD98_MEDTR	AT1G18080.1	Transducin/WD40 repeat-like superfamily protein	Medtr8g106790.1	guanine nucleotide-binding protein beta subunit-like protein
Ca03142	Ca6	12670917	12672284	1.44768	1.68023	4.86721	6.24459e-05	0.000645345	1.78681	Late embryogenesis abundant protein n_2 Tax_Papilionoideae RepID_G7LCF7_MEDTR	AT1G45688.2	#N/A	Medtr8g106580.1	late embryogenesis abundant protein
Ca03132	Ca6	12737779	12739494	-0.570547	3.59982	-6.33702	1.69989e-06	5.14194e-05	5.07332	PREDICTED: uncharacterized protein LOC101511046 n_1 Tax_Cicer arietinum RepID_UPI00032ABE20	AT1G12330.1	PTHR31029:SF4 - F5O11.6 (1 of 1)	Medtr8g106210.1	hypothetical protein
Ca03188	Ca6	12847797	12851522	0.504388	4.58171	4.8725	6.16233e-05	0.000639002	1.45802	Uncharacterized protein n_21 Tax_Mesangiospermae RepID_C6T6A5_SOYBN	AT3G62840.1	Small nuclear ribonucleoprotein family protein	Medtr8g105890.1	small nuclear ribonucleoprotein
Ca03179	Ca6	12961324	12963610	0.528671	7.0244	4.77921	7.78497e-05	0.000751427	1.22327	Uncharacterized protein n_22 Tax_Mesangiospermae RepID_I1LGB1_SOYBN	AT3G57490.1	Ribosomal protein S5 family protein	Medtr8g105340.2	40S ribosomal protein S2-4
Ca03210	Ca6	13098668	13099712	-0.374117	4.52103	-5.03474	4.10747e-05	0.000469535	1.87974	PREDICTED: F-box protein SKIP28 n_1 Tax_Cicer arietinum RepID_UPI00032AA938	AT2G01620.1	RNI-like superfamily protein	Medtr8g104920.1	F-box SKIP28-like protein
Ca03231	Ca6	13330453	13332387	0.511471	6.57548	4.87341	6.14842e-05	0.000637992	1.4599	Uncharacterized protein n_29 Tax_Pentapetalae RepID_I1L4B6_SOYBN	AT3G02560.2	Ribosomal protein S7e family protein	Medtr6g085000.1	40S ribosomal S7-like protein
Ca03232	Ca6	13348470	13351975	0.430579	4.10267	5.79703	6.24801e-06	0.000126073	3.74405	PREDICTED: putative N6-adenosine-methyltransferase MT-A70-like n_1 Tax_Cicer arietinum RepID_UPI00032AA397	AT4G10760.1	mRNAadenosine methylase	Medtr8g104280.1	N6-adenosine-methyltransferase MT-A70-like protein
Ca03238	Ca6	13420933	13427063	-0.725809	4.31532	-7.72239	7.07199e-08	6.67692e-06	8.20233	PREDICTED: peptidyl-tRNA hydrolase - chloroplastic n_1 Tax_Cicer arietinum RepID_UPI00032AB115	AT4G23160.1	cysteine-rich RLK (RECEPTOR-like protein kinase) 8	Medtr3g093120.1	SPFH domain/band 7 family protein
Ca03239	Ca6	13435564	13440367	-0.3237	4.71447	-5.07211	3.74173e-05	0.000438542	1.95436	PREDICTED: uncharacterized protein LOC101491052 n_1 Tax_Cicer arietinum RepID_UPI00032AB0A7	AT1G18460.1	alpha/beta-Hydrolases superfamily protein	Medtr8g103850.1	alpha/beta hydrolase family protein
Ca03270	Ca6	13546242	13548955	-0.723364	6.75511	-7.87882	5.01687e-08	5.29055e-06	8.5398	PREDICTED: pentatricopeptide repeat-containing protein At5g25630-like isoform X1 n_2 Tax_Cicer arietinum RepID_UPI00032A75C7	AT5G21222.1	protein kinase family protein	Medtr8g103480.2	PPR containing plant-like protein
Ca03249	Ca6	13912824	13914566	-0.725568	3.67551	-5.05136	3.94054e-05	0.000456596	1.96013	PREDICTED: protein IQ-DOMAIN 14 isoform X1 n_3 Tax_Cicer arietinum RepID_UPI00032A9A00	AT3G16490.1	IQ-domain 26	Medtr8g102400.1	IQ calmodulin-binding motif protein
Ca03256	Ca6	13944381	13946666	0.261996	8.63382	5.17937	2.86426e-05	0.00036477	2.17826	Profilin n_1 Tax_Arachis hypogaea RepID_Q5XXQ5_ARAHY	AT4G29350.1	profilin 2	Medtr8g102330.1	profilin
Ca03247	Ca6	13957407	13959993	0.887901	2.16324	5.54887	1.14761e-05	0.00018684	3.33009	PREDICTED: uncharacterized protein LOC101489321 n_1 Tax_Cicer arietinum RepID_UPI00032A9CD3	AT4G29310.1	Protein of unknown function (DUF1005)	Medtr8g102270.1	DUF1005 family protein
Ca03301	Ca6	14066438	14070444	-0.290284	5.30739	-4.98906	4.60387e-05	0.00051249	1.74193	Uncharacterized protein n_1 Tax_Phaseolus vulgaris RepID_V7C6D4_PHAVU	AT4G29160.3	SNF7 family protein	Medtr6g090515.2	charged multivesicular body protein
Ca03290	Ca6	14180788	14182071	1.98635	1.12808	5.69064	8.10314e-06	0.000148606	3.63141	PREDICTED: uncharacterized protein LOC101500241 n_1 Tax_Cicer arietinum RepID_UPI00032A6349	AT5G56840.1	myb-like transcription factor family protein	Medtr8g101650.1	MYB-like transcription factor family protein
Ca03317	Ca6	14271174	14275850	-0.326859	6.94145	-5.6701	8.52114e-06	0.00015333	3.42137	Uncharacterized protein n_8 Tax_Phaseoleae RepID_I1KPR3_SOYBN	AT2G38670.1	phosphorylethanolamine cytidylyltransferase 1	Medtr8g101470.3	ethanolamine-phosphate cytidylyltransferase
Ca03312	Ca6	14282705	14286572	0.4226	6.38134	6.2427	2.12902e-06	6.03026e-05	4.80251	PREDICTED: ABC transporter I family member 6 - chloroplastic n_1 Tax_Cicer arietinum RepID_UPI00032A9038	AT3G10670.1	non-intrinsic ABC protein 7	Medtr8g101390.1	iron-regulated ABC transporter ATPase protein
Ca03322	Ca6	14289388	14297106	1.03372	2.95504	6.31221	1.8034e-06	5.33521e-05	5.02677	PREDICTED: uncharacterized protein LOC101503219 isoform X1 n_2 Tax_Cicer arietinum RepID_UPI00032AA4E9	AT4G12750.1	Homeodomain-like transcriptional regulator	#N/A
Ca03319	Ca6	14311213	14318255	-0.608309	4.67481	-6.93685	4.16407e-07	2.14869e-05	6.42842	PREDICTED: auxin response factor 19-like isoform X1 n_2 Tax_Cicer arietinum RepID_UPI00032ACE85	AT1G19220.1	auxin response factor 19	Medtr8g101360.1	auxin response factor 2
Ca03389	Ca6	14481045	14485744	0.541404	5.39327	5.90066	4.85537e-06	0.00010794	3.97823	Phosphoribosylformylglycinamidine synthase n_3 Tax_Papilionoideae RepID_A0A072TUU6_MEDTR	AT1G74260.1	purine biosynthesis 4	Medtr6g011360.1	phosphoribosylformylglycinamidine synthase
Ca03368	Ca6	14570208	14573451	0.511975	5.59433	5.91521	4.6869e-06	0.000105977	4.01419	Uncharacterized protein n_4 Tax_rosids RepID_I1KPN2_SOYBN	AT5G53480.1	ARM repeat superfamily protein	Medtr8g099785.1	importin subunit beta-like protein
Ca03333	Ca6	14674664	14677619	-0.409025	2.90283	-5.57347	1.08021e-05	0.000179196	3.33101	PREDICTED: F-box protein SKIP8 n_1 Tax_Cicer arietinum RepID_UPI00032A8D86	AT4G10925.3	Nuclear transport factor 2 (NTF2) family protein	Medtr8g099610.1	nuclear transport factor 2 (NTF2) family protein
Ca03356	Ca6	14748355	14753205	0.580655	2.37382	4.6974	9.55829e-05	0.000858559	1.27001	UDP-D-glucose/UDP-D-galactose 4-epimerase n_1 Tax_Medicago truncatula RepID_A0A072U5W7_MEDTR	AT4G10960.1	UDP-D-glucose/UDP-D-galactose 4-epimerase 5	Medtr8g099535.1	UDP-D-glucose/UDP-D-galactose 4-epimerase
Ca03384	Ca6	15050185	15052289	0.56628	5.7932	5.80396	6.14346e-06	0.000124758	3.74445	PREDICTED: loricrin isoform X2 n_1 Tax_Cicer arietinum RepID_UPI00032ACFA4	AT1G64140.1	PTHR31827:SF14 - F22C12.10 (1 of 1)	Medtr8g099105.1	transcription factor%2C putative
Ca03415	Ca6	15230791	15233212	-1.85456	3.28938	-10.6291	2.01909e-10	1.58267e-07	13.9577	1-aminocyclopropane-1-carboxylate synthase n_6 Tax_Papilionoideae RepID_A0A072TUM5_MEDTR	AT4G11280.1	1-aminocyclopropane-1-carboxylic acid (acc) synthase 6	Medtr8g098930.1	1-aminocyclopropane-1-carboxylate synthase
Ca03441	Ca6	15427475	15430848	-0.645577	4.9287	-4.84186	6.65394e-05	0.000676226	1.38561	Uncharacterized protein n_10 Tax_Phaseoleae RepID_I1K6H0_SOYBN	AT5G41340.1	ubiquitin conjugating enzyme 4	Medtr8g098595.3	ubiquitin-conjugating enzyme
Ca03452	Ca6	15526495	15528976	-0.671131	5.82253	-5.92889	4.53386e-06	0.000103413	4.04653	NAD(P)-binding rossmann-fold protein n_5 Tax_Papilionoideae RepID_I3SYW8_MEDTR	AT4G11410.1	NAD(P)-binding Rossmann-fold superfamily protein	Medtr8g098415.4	NAD(P)-binding rossmann-fold protein
Ca03450	Ca6	15546627	15550298	0.699255	5.18583	5.30115	2.11651e-05	0.000291115	2.51512	PREDICTED: uncharacterized protein LOC101497209 n_1 Tax_Cicer arietinum RepID_UPI00032A927D	AT1G63680.1	acid-amino acid ligases;ligases;ATP binding;ATP binding;ligases	Medtr8g098345.1	UDP-N-acetylmuramyl-tripeptide synthetase
Ca03490	Ca6	15677657	15683602	0.293391	5.05339	5.72055	7.53119e-06	0.000142385	3.54097	PREDICTED: glutathione S-transferase T1-like n_1 Tax_Cicer arietinum RepID_UPI00032A7A2B	AT5G41210.1	glutathione S-transferase THETA 1	Medtr8g098420.2	glutathione S-transferase theta
Ca03430	Ca6	15693666	15696535	0.809477	3.46372	5.82078	5.8966e-06	0.000121384	3.83415	PREDICTED: RNA-binding protein NOB1 n_1 Tax_Cicer arietinum RepID_UPI00032AA04B	AT5G41190.1	K11883 - RNA-binding protein NOB1 (NOB1) (1 of 1)	Medtr8g098490.2	RNA-binding protein NOB1
Ca03429	Ca6	15754537	15756349	-1.15583	0.88942	-4.73473	8.70374e-05	0.000808251	1.53239	PREDICTED: LIM domain-containing protein WLIM2b-like n_1 Tax_Cicer arietinum RepID_UPI00032A8933	AT3G55770.7	GATA type zinc finger transcription factor family protein	Medtr8g097300.1	GATA type zinc finger transcription factor family protein
Ca03471	Ca6	16024378	16027018	-0.614239	7.48235	-7.11389	2.77293e-07	1.64561e-05	6.8316	PREDICTED: bidirectional sugar transporter SWEET13-like n_1 Tax_Cicer arietinum RepID_UPI00032A7273	AT5G50800.1	Nodulin MtN3 family protein	Medtr8g096320.2	bidirectional sugar transporter
Ca03507	Ca6	16148746	16154873	0.981926	1.70038	5.37734	1.75246e-05	0.000255518	2.94583	Uncharacterized protein n_4 Tax_Papilionoideae RepID_G7LI47_MEDTR	AT3G48830.1	polynucleotide adenylyltransferase family protein / RNA recognition motif (RRM)-containing protein	Medtr8g099900.3	tRNA nucleotidyltransferase/poly(A) polymerase
Ca03518	Ca6	16421027	16427327	-0.580152	2.6428	-6.76791	6.16077e-07	2.70773e-05	6.1733	PREDICTED: respiratory burst oxidase homolog protein D-like n_1 Tax_Cicer arietinum RepID_UPI00032A9B18	AT5G47910.1	respiratory burst oxidase homologue D	Medtr8g095520.1	respiratory burst oxidase-like protein D
Ca03562	Ca6	16804839	16811260	-0.524793	6.32344	-7.27929	1.90348e-07	1.29395e-05	7.21107	PREDICTED: fatty acid amide hydrolase-like isoform X1 n_2 Tax_Cicer arietinum RepID_UPI00032A96AF	AT5G64440.1	fatty acid amide hydrolase	Medtr8g094740.1	fatty acid amide hydrolase-like protein
Ca03554	Ca6	16852344	16856864	-0.480662	5.41201	-6.05252	3.3619e-06	8.34267e-05	4.34328	PREDICTED: aspartic proteinase Asp1-like n_1 Tax_Cicer arietinum RepID_UPI00032AD22D	AT4G33490.1	Eukaryotic aspartyl protease family protein	Medtr8g094590.2	eukaryotic aspartyl protease family protein
Ca03590	Ca6	17018951	17020761	0.698489	5.49785	7.71926	7.12089e-08	6.68184e-06	8.18978	40S ribosomal protein S12 n_1 Tax_Medicago truncatula RepID_G7LE33_MEDTR	AT2G32060.3	Ribosomal protein L7Ae/L30e/S12e/Gadd45 family protein	Medtr5g012890.2	ribosomal protein L7Ae/L30e/S12e/Gadd45 family protein
Ca03592	Ca6	17361928	17365410	0.791546	6.71507	5.87386	5.18215e-06	0.000111648	3.91526	PREDICTED: probable mannitol dehydrogenase n_1 Tax_Cicer arietinum RepID_UPI00032A5680	AT4G39330.2	cinnamyl alcohol dehydrogenase 9	Medtr8g092630.1	cinnamyl alcohol dehydrogenase-like protein
Ca03655	Ca6	17455308	17455725	-1.04385	1.74055	-4.8526	6.4773e-05	0.000663566	1.69663	PREDICTED: uncharacterized protein LOC101507205 n_1 Tax_Cicer arietinum RepID_UPI00032A8F40	#N/A	#N/A	Medtr8g092320.1	hypothetical protein
Ca03641	Ca6	17503197	17506412	0.618312	3.54837	5.31679	2.03601e-05	0.000282328	2.62087	PREDICTED: UDP-galactose transporter 2-like n_1 Tax_Cicer arietinum RepID_UPI00032A9DAE	AT4G09810.1	Nucleotide-sugar transporter family protein	Medtr8g092190.2	nucleotide/sugar transporter family protein
Ca03628	Ca6	17584956	17597276	0.897763	4.11017	5.40452	1.63852e-05	0.000244023	2.78095	PREDICTED: UPF0202 protein At1g10490 n_1 Tax_Cicer arietinum RepID_UPI00032A7252	AT1G10490.1	Domain of unknown function (DUF1726) ;Putative ATPase (DUF699)	Medtr8g092060.2	UPF0202 plant-like protein
Ca03614	Ca6	17707405	17712008	0.441326	4.33173	5.15545	3.04001e-05	0.000378773	2.1711	PREDICTED: uncharacterized protein LOC101491153 n_1 Tax_Cicer arietinum RepID_UPI00032A9563	#N/A	#N/A	#N/A
Ca03618	Ca6	17771224	17775922	-0.405084	5.87813	-4.89304	5.85347e-05	0.000615783	1.50814	Putative uncharacterized protein n_3 Tax_Medicago truncatula RepID_B7FN72_MEDTR	#N/A	#N/A	#N/A
Ca03667	Ca6	17881606	17886007	0.750982	10.2276	4.85892	6.3756e-05	0.000654901	1.34271	Myo-inositol-1-phosphate synthases n_6 Tax_Papilionoideae RepID_A4ULF9_MEDSF	AT2G22240.2	myo-inositol-1-phosphate synthase 2	Medtr8g091320.1	myo-inositol 1-phosphate synthase
Ca03729	Ca6	18054615	18058037	-0.802185	2.76408	-5.24595	2.42733e-05	0.000321437	2.53673	PREDICTED: BTB/POZ domain-containing protein DOT3 isoform X1 n_2 Tax_Cicer arietinum RepID_UPI00032A7D1D	AT5G10250.1	Phototropic-responsive NPH3 family protein	Medtr8g090220.1	phototropic-responsive NPH3 family protein
Ca03730	Ca6	18080217	18084756	0.34991	4.92476	5.73753	7.2249e-06	0.000139812	3.5848	Ubiquitin carboxyl-terminal hydrolase - putative n_60 Tax_Magnoliophyta RepID_B9SZ50_RICCO	AT4G39910.1	ubiquitin-specific protease 3	Medtr8g090190.1	ubiquitin carboxyl-terminal hydrolase
Ca03700	Ca6	18118135	18121182	1.46433	2.13545	6.349	1.6521e-06	5.07408e-05	5.25207	Nucleotide/sugar transporter family protein n_3 Tax_Papilionoideae RepID_A0A072TUH1_MEDTR	AT5G04160.1	Nucleotide-sugar transporter family protein	Medtr8g090130.1	nucleotide/sugar transporter family protein
Ca03740	Ca6	18208799	18214097	0.768712	3.64995	5.16957	2.93498e-05	0.000371303	2.26637	Polyadenylate-binding protein II n_3 Tax_Papilionoideae RepID_B7FID7_MEDTR	AT5G65260.1	RNA-binding (RRM/RBD/RNP motifs) family protein	Medtr8g089990.1	polyadenylate-binding protein II
Ca03739	Ca6	18257303	18262761	0.792995	3.93511	5.86598	5.28231e-06	0.000113314	3.94673	Signal transducer - putative n_2 Tax_Papilionoideae RepID_A0A072TV91_MEDTR	AT4G40050.1	Protein of unknown function (DUF3550/UPF0682)	Medtr8g089935.1	signal transducer%2C putative
Ca03695	Ca6	18483252	18485489	-0.675574	5.25678	-7.63546	8.57069e-08	7.7111e-06	8.0037	PREDICTED: uncharacterized protein LOC101497318 isoform X1 n_2 Tax_Cicer arietinum RepID_UPI00032AC123	AT5G59400.2	#N/A	Medtr2g097230.1	PGR5-like protein 1A%2C putative
Ca03678	Ca6	18637388	18640714	-0.660753	4.04474	-5.35305	1.86107e-05	0.000266278	2.65401	E3 ubiquitin-protein ligase XBAT31-like protein n_2 Tax_Papilionoideae RepID_A0A072UKA7_MEDTR	AT2G28840.2	XB3 ortholog 1 in Arabidopsis thaliana	Medtr4g063830.1	E3 ubiquitin-protein ligase XBAT31-like protein
Ca03675	Ca6	18659349	18664379	-0.479123	5.07429	-4.73218	8.75956e-05	0.000811985	1.10609	Armadillo/beta-catenin repeat protein n_2 Tax_Papilionoideae RepID_A0A072UM21_MEDTR	AT3G46510.1	plant U-box 13	Medtr4g063800.1	armadillo/beta-catenin repeat protein
Ca03677	Ca6	18679253	18680458	-0.857498	0.816025	-4.87751	6.08564e-05	0.000633627	1.84499	PREDICTED: dof zinc finger protein DOF3.6-like n_1 Tax_Cicer arietinum RepID_UPI00032A866C	AT3G55370.2	OBF-binding protein 3	Medtr4g063780.1	Dof domain zinc finger protein
Ca03714	Ca6	18747722	18750226	1.79378	4.94973	7.11993	2.73493e-07	1.64042e-05	6.87812	Heat shock cognate 70 kDa protein n_231 Tax_cellular organisms RepID_HSP7C_PETHY	AT3G12580.1	heat shock protein 70	Medtr4g063710.1	heat shock cognate 70 kDa protein
Ca03752	Ca6	18925627	18927413	2.17669	2.68986	6.31782	1.77946e-06	5.31579e-05	5.1817	Uncharacterized protein n_8 Tax_Phaseoleae RepID_I1M4S8_SOYBN	AT3G26520.1	tonoplast intrinsic protein 2, water channel activity, water homeostasis	Medtr4g063090.1	tonoplast intrinsic protein
Ca03747	Ca6	19118951	19126260	-0.456125	2.20832	-4.80772	7.24818e-05	0.00071431	1.53124	PREDICTED: nudix hydrolase 9 n_1 Tax_Cicer arietinum RepID_UPI00032ABBDD	AT3G46200.1	nudix hydrolase homolog 9	Medtr4g062130.2	nudix hydrolase-like protein
Ca03761	Ca6	19293946	19303913	-0.944623	2.69218	-6.65344	8.04984e-07	3.14087e-05	5.92923	PREDICTED: phototropin-1-like n_1 Tax_Cicer arietinum RepID_UPI00032A9AD0	AT3G45780.2	phototropin 1	Medtr4g061610.1	nonphototropic hypocotyl protein
Ca03777	Ca6	19403388	19407259	-0.800373	3.01668	-4.73585	8.67917e-05	0.000807469	1.27466	PREDICTED: ethylene-responsive transcription factor RAP2-7 n_1 Tax_Cicer arietinum RepID_UPI00032AACDE	AT4G36920.2	Integrase-type DNA-binding superfamily protein	Medtr4g061200.4	AP2-like ethylene-responsive transcription factor
Ca03797	Ca6	19523841	19528505	0.301357	4.34254	4.79408	7.50015e-05	0.000734167	1.27705	PREDICTED: arogenate dehydratase/prephenate dehydratase 2 - chloroplastic-like n_1 Tax_Cicer arietinum RepID_UPI00032A7A82	AT3G07630.2	arogenate dehydratase 2	Medtr4g061070.1	arogenate/prephenate dehydratase
Ca03794	Ca6	19552742	19554638	-0.755907	2.86886	-6.99857	3.61208e-07	1.9591e-05	6.68635	PREDICTED: dof zinc finger protein DOF2.1 n_1 Tax_Cicer arietinum RepID_UPI00032A668E	AT2G28510.1	Dof-type zinc finger DNA-binding family protein	Medtr4g461080.1	Dof-type zinc finger DNA-binding family protein
Ca03815	Ca6	19600346	19604620	0.333784	5.5449	4.86316	6.30826e-05	0.000650167	1.432	PREDICTED: tetraspanin-3 n_1 Tax_Cicer arietinum RepID_UPI00032A4EE3	AT3G45600.1	tetraspanin3	Medtr4g061010.1	tetraspanin family protein
Ca03826	Ca6	20183747	20203287	-0.29227	4.92499	-5.99803	3.83484e-06	9.10504e-05	4.2127	PREDICTED: serine/threonine-protein phosphatase 6 regulatory subunit 3-B-like n_1 Tax_Cicer arietinum RepID_UPI00032AA156	AT4G23160.1	cysteine-rich RLK (RECEPTOR-like protein kinase) 8	Medtr2g094550.1	SIT4 phosphatase-associated family protein
Ca03893	Ca6	20545850	20550945	-0.669833	4.07729	-6.2999	1.85711e-06	5.45193e-05	4.97956	PREDICTED: uncharacterized protein LOC101500025 n_1 Tax_Cicer arietinum RepID_UPI00032A7A2A	AT5G60710.1	Zinc finger (C3HC4-type RING finger) family protein	Medtr4g058700.1	zinc finger%2C C3HC4 type (RING finger) protein
Ca04074	Ca6	22605106	22608097	1.13817	1.4525	6.92434	4.28613e-07	2.1815e-05	6.5482	PREDICTED: uncharacterized protein LOC101512233 n_1 Tax_Cicer arietinum RepID_UPI00032ABAE6	AT2G27590.1	S-adenosyl-L-methionine-dependent methyltransferases superfamily protein	Medtr4g053410.3	methyltransferase type 11
Ca04015	Ca6	22783230	22783697	1.0707	3.82968	5.54045	1.17164e-05	0.000189758	3.15096	PREDICTED: ferredoxin - root R-B1 isoform X1 n_1 Tax_Cicer arietinum RepID_UPI00032A6921	AT2G27510.1	ferredoxin 3	Medtr4g053120.1	2Fe-2S ferredoxin superfamily protein
Ca04038	Ca6	23018912	23029468	0.344242	5.10299	4.84424	6.61433e-05	0.000673734	1.38493	Nicalin n_2 Tax_Papilionoideae RepID_A0A072UVE5_MEDTR	AT3G44330.1	PF05450 - Nicastrin (Nicastrin) (1 of 2)	Medtr4g052530.1	M28 Zn-peptidase nicastrin
Ca04099	Ca6	23631824	23634363	-0.993955	5.92596	-6.01062	3.71992e-06	8.9665e-05	4.24497	PREDICTED: protein FAF-like - chloroplastic n_1 Tax_Cicer arietinum RepID_UPI00032A8AC2	AT5G22090.2	Protein of unknown function (DUF3049)	Medtr4g050590.1	FAF-like protein
Ca04158	Ca6	24354310	24360695	-1.03559	2.41797	-7.34698	1.63355e-07	1.19272e-05	7.47337	Putative serine/threonine-protein kinase n_10 Tax_Papilionoideae RepID_A0A0B2RDJ7_GLYSO	AT4G00710.1	BR-signaling kinase 3	Medtr4g020070.2	LRR receptor-like kinase
Ca04131	Ca6	24428829	24431897	0.625149	2.3754	6.21274	2.28725e-06	6.37342e-05	4.89422	PREDICTED: uncharacterized protein LOC101496728 n_1 Tax_Cicer arietinum RepID_UPI00032A682D	AT2G29510.1	Protein of unknown function (DUF3527)	Medtr4g019900.1	DUF3527 domain protein
Ca04153	Ca6	24857740	24861779	-0.979769	1.09916	-7.99422	3.90249e-08	4.42138e-06	8.6982	PREDICTED: structure-specific endonuclease subunit slx1 n_1 Tax_Cicer arietinum RepID_UPI00032A9219	#N/A	#N/A	Medtr0003s0480.1	structure-specific endonuclease subunit SLX1-like protein
Ca04172	Ca6	25353551	25358796	-0.693883	2.37516	-4.77727	7.82305e-05	0.000753486	1.47295	PREDICTED: putative disease resistance protein At3g14460 n_1 Tax_Cicer arietinum RepID_UPI0006413D22	AT3G14460.1	LRR and NB-ARC domains-containing disease resistance protein	Medtr0005s0230.1	LRR and NB-ARC domain disease resistance protein
Ca04354	Ca6	27280485	27290710	-0.665824	2.96389	-5.82221	5.87618e-06	0.000121137	3.89681	PREDICTED: cucumisin-like n_1 Tax_Cicer arietinum RepID_UPI00032AA1A7	AT5G58830.1	Subtilisin-like serine endopeptidase family protein	Medtr6g075370.1	subtilisin-like serine endopeptidase family protein
Ca04352	Ca6	27387247	27388641	-1.02246	1.33729	-5.22644	2.54789e-05	0.000333362	2.66505	Transmembrane protein n_1 Tax_Medicago truncatula RepID_G7L8Q3_MEDTR	AT3G09085.1	Protein of unknown function (DUF962)	Medtr4g014970.1	transmembrane protein
Ca04388	Ca6	29266960	29269383	-1.15279	4.37078	-5.87843	5.12489e-06	0.000111413	3.95913	PREDICTED: putative glycerol-3-phosphate transporter 1 n_1 Tax_Cicer arietinum RepID_UPI00032A9C77	AT3G47420.1	phosphate starvation-induced gene 3	Medtr0004s0650.1	glycerol-3-phosphate transporter
Ca04424	Ca6	29409499	29410826	-0.553309	6.98481	-5.72072	7.5281e-06	0.000142385	3.54508	PREDICTED: peroxisomal membrane protein 11B n_1 Tax_Cicer arietinum RepID_UPI00032A5447	AT3G47430.1	peroxin 11B	Medtr0004s0440.1	peroxisomal biogenesis factor 11 family protein
Ca04433	Ca6	29558945	29569713	1.83436	2.81358	5.2211	2.58191e-05	0.000336088	2.56814	Purple acid phosphatase n_1 Tax_Glycine soja RepID_A0A0B2PVH0_GLYSO	#N/A	#N/A	Medtr1g052505.1	inactive purple acid phosphatase-like protein
Ca04418	Ca6	29701166	29706671	0.865588	1.4389	5.0214	4.24659e-05	0.00048363	2.09308	PREDICTED: chloride conductance regulatory protein ICln n_1 Tax_Cicer arietinum RepID_UPI00032A6148	AT5G62290.1	nucleotide-sensitive chloride conductance regulator (ICln) family protein, chloride transport	Medtr4g033850.1	chloride conductance regulatory protein ICln protein
Ca04487	Ca6	30703017	30704285	-0.509159	7.5614	-5.04994	3.95456e-05	0.000457162	1.89316	PREDICTED: NAD(P)H-quinone oxidoreductase subunit T - chloroplastic n_1 Tax_Cicer arietinum RepID_UPI00032AB10B	AT4G09350.1	Chaperone DnaJ-domain superfamily protein	Medtr4g032805.1	DnaJ heat shock amine-terminal domain protein
Ca04535	Ca6	30822006	30833213	0.96927	1.99061	5.148	3.09696e-05	0.000382308	2.36529	PREDICTED: peptidyl-prolyl cis-trans isomerase FKBP43-like isoform X1 n_3 Tax_Cicer arietinum RepID_UPI00032AA7FA	AT3G12340.1	FKBP-like peptidyl-prolyl cis-trans isomerase family protein	Medtr4g032680.2	FKBP-type peptidyl-prolyl cis-trans isomerase
Ca04506	Ca6	31146813	31151934	-0.348996	5.41344	-4.82449	6.94976e-05	0.000693405	1.3344	PREDICTED: protein AIG1 n_1 Tax_Cicer arietinum RepID_UPI00032A6A8E	AT1G33950.1	Avirulence induced gene (AIG1) family protein	Medtr4g032220.1	P-loop nucleoside triphosphate hydrolase superfamily protein
Ca04516	Ca6	31440749	31441520	3.15106	6.64531	10.8372	1.38173e-10	1.4089e-07	14.3836	Non-specific lipid-transfer protein n_2 Tax_Cicer arietinum RepID_NLTP_CICAR	AT2G38540.1	lipid transfer protein 1,cell wall organization, lipid transport	Medtr4g428370.1	Lipid transfer protein
Ca04547	Ca6	32190854	32192384	-0.847886	1.86498	-5.99943	3.82192e-06	9.10504e-05	4.44933	PREDICTED: uncharacterized protein LOC101509538 isoform X1 n_3 Tax_Cicer arietinum RepID_UPI0006412E53	#N/A	#N/A	Medtr4g029130.1	hypothetical protein
Ca04617	Ca6	33248315	33252970	-0.669603	4.34472	-8.38215	1.69938e-08	2.65225e-06	9.62574	PREDICTED: vesicle-associated protein 1-1-like n_1 Tax_Cicer arietinum RepID_UPI00032A9019	AT3G60600.1	vesicle associated protein, intercellular transport	Medtr4g027050.1	VAMP-associated protein
Ca04718	Ca6	34553945	34560466	0.581562	3.57748	6.01874	3.64764e-06	8.84161e-05	4.32493	PREDICTED: protein NRT1/ PTR FAMILY 7.3-like n_1 Tax_Cicer arietinum RepID_UPI00032A7E95	AT1G32450.1	nitrate transporter 1.5	Medtr4g024930.1	peptide/nitrate transporter
Ca04736	Ca6	35154667	35156949	0.41731	5.5319	4.86836	6.22661e-05	0.000644357	1.44579	Cytoplasmic ribosomal protein S13-like n_5 Tax_Solanaceae RepID_Q2V995_SOLTU	AT4G00100.1	ribosomal protein S13A	Medtr5g011910.1	cytoplasmic ribosomal protein S13
Ca04727	Ca6	35520977	35527878	1.12767	10.5747	4.73022	8.80263e-05	0.000814007	1.00813	Caffeic acid O-methyltransferase n_3 Tax_Papilionoideae RepID_G7JTH4_MEDTR	AT5G54160.1	O-methyltransferase 1	Medtr4g038440.2	caffeic acid O-methyltransferase
Ca04758	Ca6	35944832	35946030	0.418937	8.62841	5.11152	3.39153e-05	0.000407927	2.01706	Type 1 metallothionein n_1 Tax_Pisum sativum RepID_Q75NH7_PEA	#N/A	#N/A	Medtr4g021730.1	metallothionein
Ca04775	Ca6	36011234	36013140	0.759659	1.36394	5.17517	2.89441e-05	0.000367924	2.49811	PREDICTED: mitochondrial import inner membrane translocase subunit Tim9-like n_1 Tax_Cicer arietinum RepID_UPI00032A77B2	AT3G46560.1	Tim10/DDP family zinc finger protein	Medtr4g063925.1	import inner membrane translocase protein
Ca04776	Ca6	36042657	36048131	-0.442348	4.56406	-4.75647	8.2418e-05	0.000779582	1.1837	PREDICTED: auxin response factor 9-like n_1 Tax_Cicer arietinum RepID_UPI00064158C9	AT2G46530.1	auxin response factor 11	Medtr4g021580.1	auxin response factor 2
Ca04793	Ca6	36853605	36857004	-0.903436	0.905896	-4.61482	0.000117596	0.00099153	1.24593	Phototropic-responsive NPH3 family protein n_1 Tax_Medicago truncatula RepID_G7JUJ0_MEDTR	AT5G48800.1	Phototropic-responsive NPH3 family protein	Medtr4g022330.1	phototropic-responsive NPH3 family protein
Ca04847	Ca6	37683182	37687778	0.763457	6.86027	6.4789	1.21399e-06	4.14992e-05	5.36141	PREDICTED: aldo-keto reductase family 4 member C9-like n_1 Tax_Cicer arietinum RepID_UPI00032AAD5E	AT2G37770.1	NAD(P)-linked oxidoreductase superfamily protein	Medtr4g021350.2	aldo/keto reductase family oxidoreductase
Ca04857	Ca6	37931028	37944930	3.94973	3.79758	5.82217	5.87667e-06	0.000121137	3.95956	Delta-1-pyrroline-5-carboxylate synthase n_17 Tax_Phaseoleae RepID_A0A0B2PDQ3_GLYSO	AT2G39800.4	delta1-pyrroline-5-carboxylate synthase 1, response to salt stress	Medtr4g020110.1	delta-1-pyrroline-5-carboxylate synthetase
Ca04862	Ca6	38305198	38307798	0.379688	4.83523	5.52901	1.20511e-05	0.000193006	3.07365	PREDICTED: fructokinase-like 1 - chloroplastic n_1 Tax_Cicer arietinum RepID_UPI00032AC26A	AT3G54090.1	fructokinase-like 1	Medtr4g019165.1	pfkB family carbohydrate kinase
Ca04883	Ca6	38424047	38426402	1.03	3.79579	5.63224	9.35015e-06	0.000162697	3.37856	Uncharacterized protein n_7 Tax_Pentapetalae RepID_M5VXY9_PRUPE	AT5G23860.2	tubulin beta 8	Medtr1g101130.1	tubulin beta-1 chain
Ca04886	Ca6	38439900	38443469	0.696635	1.80215	4.9552	5.01054e-05	0.000545453	1.94045	PREDICTED: pentatricopeptide repeat-containing protein At1g52620-like n_1 Tax_Cicer arietinum RepID_UPI00032ABC5A	AT1G52620.1	Pentatricopeptide repeat (PPR) superfamily protein	Medtr2g103520.1	PPR containing plant-like protein
Ca04925	Ca6	38549559	38553586	0.991691	3.08684	5.74033	7.17566e-06	0.000139456	3.67962	PREDICTED: protein MAK16 homolog B isoform X2 n_1 Tax_Cicer arietinum RepID_UPI00032A7BDA	AT1G23280.1	MAK16 protein-related	Medtr2g103560.1	MAK16 protein carboxy-terminal region protein
Ca04949	Ca6	39441073	39443161	-0.530872	2.38445	-4.70247	9.43736e-05	0.000853604	1.30557	PREDICTED: F-box protein At5g07670 n_1 Tax_Cicer arietinum RepID_UPI00032A5E78	AT5G07670.1	RNI-like superfamily protein	Medtr4g036815.1	F-box-like protein
Ca04990	Ca6	39727076	39732866	-0.644647	6.3692	-5.53192	1.19651e-05	0.000192435	3.08405	PREDICTED: uncharacterized protein LOC101504892 isoform X1 n_2 Tax_Cicer arietinum RepID_UPI00032A6A1A	AT4G25290.1	DNA photolyases;DNA photolyases	Medtr4g036495.1	deoxyribodipyrimidine photolyase
Ca04970	Ca6	39892007	39897371	-0.588275	6.54864	-4.88966	5.90333e-05	0.000619283	1.5014	PREDICTED: trehalose-phosphate phosphatase A-like n_1 Tax_Cicer arietinum RepID_UPI00032AB821	AT4G22590.1	Haloacid dehalogenase-like hydrolase (HAD) superfamily protein	Medtr4g036090.1	trehalose-phosphate phosphatase
Ca05051	Ca6	41182261	41184178	0.822683	1.20461	6.13647	2.74659e-06	7.29325e-05	4.75682	PREDICTED: pentatricopeptide repeat-containing protein At2g20710 - mitochondrial-like n_1 Tax_Cicer arietinum RepID_UPI00032AC787	AT2G20710.1	Tetratricopeptide repeat (TPR)-like superfamily protein	Medtr8g465890.1	PPR containing plant protein
Ca05166	Ca6	42653420	42655619	-0.830216	5.06194	-6.49011	1.18225e-06	4.09484e-05	5.38886	PREDICTED: uncharacterized protein LOC101496958 n_1 Tax_Cicer arietinum RepID_UPI00032A5246	#N/A	#N/A	#N/A
Ca05285	Ca6	44481298	44494423	-0.761546	4.55367	-10.4281	2.92627e-10	1.72143e-07	13.6452	AMP deaminase n_2 Tax_Papilionoideae RepID_G7JQ45_MEDTR	AT2G38280.2	AMP deaminase, putative / myoadenylate deaminase, putative	Medtr4g016980.1	AMP deaminase
Ca05284	Ca6	44554491	44557278	0.293524	6.27846	4.86687	6.2499e-05	0.000645457	1.4446	PREDICTED: bifunctional monothiol glutaredoxin-S16 - chloroplastic n_1 Tax_Cicer arietinum RepID_UPI00032AC874	AT2G38270.1	CAX-interacting protein 2, cation transport, cell redox homeostasis	Medtr4g016930.1	monothiol glutaredoxin-S16 protein
Ca05310	Ca6	44866045	44868875	-0.976671	5.3422	-6.55337	1.01834e-06	3.69964e-05	5.53509	PREDICTED: rhodanese-like domain-containing protein 10 n_1 Tax_Cicer arietinum RepID_UPI000640C88B	AT3G08920.1	Rhodanese/Cell cycle control phosphatase superfamily protein	Medtr4g015860.1	rhodanese/cell cycle control phosphatase superfamily protein
Ca05316	Ca6	45315478	45319957	-0.501576	7.95332	-4.9121	5.58087e-05	0.000593185	1.54736	Pyridoxal biosynthesis protein PDX2 n_3 Tax_Papilionoideae RepID_G7JN26_MEDTR	AT5G60540.1	pyridoxine biosynthesis 2	Medtr4g015590.1	pyridoxal biosynthesis protein PDX2
Ca05353	Ca6	45536413	45541880	-1.00294	6.52033	-6.47918	1.2132e-06	4.14992e-05	5.36227	PREDICTED: sulfoquinovosyl transferase SQD2 n_1 Tax_Cicer arietinum RepID_UPI00032AB48A	AT5G01220.1	sulfoquinovosyldiacylglycerol 2	Medtr4g015260.2	group 1 family glycosyltransferase
Ca05384	Ca6	45873228	45880917	1.12569	1.53866	4.88874	5.91695e-05	0.000620286	1.86974	PREDICTED: gamma-interferon-inducible lysosomal thiol reductase-like n_1 Tax_Cicer arietinum RepID_UPI00032A60CC	AT5G01580.1	gamma interferon responsive lysosomal thiol (GILT) reductase family protein	Medtr4g014610.1	gamma interferon inducible lysosomal thiol reductase
Ca05401	Ca6	45983372	45984458	-0.972095	2.3292	-4.90615	5.66463e-05	0.000600004	1.75522	No Hits	#N/A	#N/A	#N/A
Ca05473	Ca6	46596866	46601104	-0.364029	7.45754	-5.60766	9.93173e-06	0.000170298	3.26478	D-glycerate dehydrogenase/hydroxypyruvate reductase n_4 Tax_Papilionoideae RepID_G7JJF7_MEDTR	AT1G79870.1	D-isomer specific 2-hydroxyacid dehydrogenase family protein	Medtr4g013100.1	D-glycerate dehydrogenase/hydroxypyruvate reductase
Ca05488	Ca6	46947649	46953735	-1.16336	4.50158	-11.7923	2.578e-11	4.92882e-08	16.0249	Sulfate/bicarbonate/oxalate exchanger and transporter sat-1 n_2 Tax_Papilionoideae RepID_A0A072UI28_MEDTR	AT3G15990.1	sulfate transporter 3;4	Medtr4g011970.1	sulfate/bicarbonate/oxalate exchanger and transporter sat-1
Ca05539	Ca6	47644404	47651577	0.730011	3.48729	5.283	2.21401e-05	0.00030074	2.52412	PREDICTED: WD repeat-containing protein 43 isoform X2 n_3 Tax_Cicer arietinum RepID_UPI00032A5E8F	#N/A	#N/A	Medtr4g011300.1	transducin family protein/WD-40 repeat protein%2C putative
Ca05542	Ca6	47656191	47659681	-0.585785	4.75395	-6.17055	2.53072e-06	6.82669e-05	4.636	PREDICTED: protein NRT1/ PTR FAMILY 1.2-like isoform X1 n_2 Tax_Cicer arietinum RepID_UPI00032A9425	AT1G52190.1	Major facilitator superfamily protein	Medtr4g011280.1	peptide/nitrate transporter plant
Ca05568	Ca6	48309047	48315105	-0.426879	8.19384	-6.63541	8.39733e-07	3.21093e-05	5.71812	PREDICTED: uncharacterized protein LOC101497983 isoform X1 n_2 Tax_Cicer arietinum RepID_UPI00032AB4D6	AT1G52510.1	alpha/beta-Hydrolases superfamily protein	Medtr4g010000.2	alpha/beta fold hydrolase
Ca05571	Ca6	48398128	48407666	-0.556125	5.68711	-7.21169	2.21889e-07	1.43198e-05	7.05487	Uncharacterized protein n_2 Tax_Papilionoideae RepID_I3SDZ9_MEDTR	AT1G15740.1	Leucine-rich repeat family protein	Medtr4g009873.1	F-box/LRR protein%2C putative
Ca05852	Ca6	48928577	48967329	-1.02512	3.72504	-5.11451	3.3664e-05	0.000406065	2.1147	PREDICTED: auxin-induced protein 10A5-like n_1 Tax_Cicer arietinum RepID_UPI00032AD2AA	AT4G23160.1	cysteine-rich RLK (RECEPTOR-like protein kinase) 8	Medtr3g093120.1	SPFH domain/band 7 family protein
Ca05854	Ca6	48967340	48982562	-0.947756	1.0859	-5.01387	4.32723e-05	0.000490259	2.17746	PREDICTED: uncharacterized protein LOC101514502 n_1 Tax_Cicer arietinum RepID_UPI00032A964E	AT4G38840.1	SAUR-like auxin-responsive protein family	Medtr4g072370.1	SAUR-like auxin-responsive family protein
Ca05855	Ca6	48990969	48991244	-2.41929	0.746386	-9.42094	2.02245e-09	5.72841e-07	10.6231	PREDICTED: auxin-induced protein 6B-like n_1 Tax_Cicer arietinum RepID_UPI00032AA24E	AT5G18080.1	SAUR-like auxin-responsive protein family, regulation of growth,auxin-activated signaling pathway	Medtr4g072310.1	SAUR-like auxin-responsive family protein
Ca05617	Ca6	49193573	49199550	0.35858	4.15165	4.9824	4.68114e-05	0.000518039	1.74149	Uncharacterized protein n_1 Tax_Cicer arietinum RepID_V9PIY4_CICAR	AT1G51560.1	Pyridoxamine 5'-phosphate oxidase family protein	Medtr4g007990.1	pyridoxamine 5'-phosphate oxidase family protein
Ca05625	Ca6	49510804	49512575	-0.898091	5.45786	-4.72383	8.94496e-05	0.000821701	1.08625	PREDICTED: chaperone protein dnaJ 8 - chloroplastic n_1 Tax_Cicer arietinum RepID_UPI00032A7782	#N/A	#N/A	Medtr4g007300.1	chaperone DnaJ domain protein
Ca05665	Ca6	49946004	49951049	-0.654232	4.03505	-4.73559	8.68487e-05	0.000807508	1.1514	PREDICTED: 3-oxoacyl-[acyl-carrier-protein] synthase 3 A - chloroplastic-like n_1 Tax_Cicer arietinum RepID_UPI00032A8E39	AT1G62640.2	3-ketoacyl-acyl carrier protein synthase III	Medtr4g007180.1	3-ketoacyl carrier synthase III
Ca05668	Ca6	49952954	49958127	-0.472369	8.21491	-5.71673	7.60193e-06	0.000143127	3.51723	PREDICTED: ACT domain-containing protein ACR11-like n_1 Tax_Cicer arietinum RepID_UPI00032A8B07	AT1G16880.1	uridylyltransferase-related	Medtr2g105090.1	DS12 from 2D-PAGE of leaf protein%2C putative
Ca05666	Ca6	49981615	49983627	-0.448429	4.16233	-5.93899	4.4242e-06	0.000102372	4.08187	Phospholipid N-methyltransferase n_2 Tax_Papilionoideae RepID_B7FMY4_MEDTR	AT1G80860.2	phospholipid N-methyltransferase	Medtr4g007090.1	phospholipid N-methyltransferase
Ca05670	Ca6	49985058	49989562	-0.356297	8.87352	-4.97397	4.78088e-05	0.000526789	1.67516	PREDICTED: photosynthetic NDH subunit of subcomplex B 1 - chloroplastic n_1 Tax_Cicer arietinum RepID_UPI00032A9589	AT1G15980.1	NDH-dependent cyclic electron flow 1	Medtr4g007080.1	NDH-dependent cyclic electron flow protein
Ca05698	Ca6	50089592	50090555	0.469714	5.15308	5.63286	9.33588e-06	0.000162697	3.32718	40S ribosomal protein S12 n_3 Tax_Papilionoideae RepID_G7JDB2_MEDTR	AT2G32060.3	Ribosomal protein L7Ae/L30e/S12e/Gadd45 family protein	Medtr5g012890.2	ribosomal protein L7Ae/L30e/S12e/Gadd45 family protein
Ca05683	Ca6	50406218	50412544	-0.430358	5.75037	-6.15137	2.65002e-06	7.08603e-05	4.58201	PREDICTED: uncharacterized protein LOC101496135 n_1 Tax_Cicer arietinum RepID_UPI00032A5236	AT5G12950.1	Putative glycosyl hydrolase of unknown function (DUF1680)	Medtr4g065150.1	DUF1680 domain protein
Ca05684	Ca6	50455123	50458502	1.40164	3.81181	11.8376	2.38655e-11	4.92882e-08	16.0849	PREDICTED: transcription factor bHLH122 n_1 Tax_Cicer arietinum RepID_UPI00064143B2	#N/A	#N/A	Medtr4g065870.3	transcription factor bHLH122-like protein
Ca05709	Ca6	50499515	50505039	2.19306	1.7117	6.65633	7.99539e-07	3.12761e-05	5.8862	PREDICTED: putative lysine-specific demethylase JMJD5 n_2 Tax_Cicer arietinum RepID_UPI00032A8E7B	AT3G20810.3	2-oxoglutarate (2OG) and Fe(II)-dependent oxygenase superfamily protein, regulation of circadian rhythm, oxidation-reduction process	Medtr4g066020.1	transcription factor jumonji (JmjC) domain protein
Ca05707	Ca6	50511331	50518566	0.392982	2.9019	4.63843	0.000110828	0.000951665	1.08402	PREDICTED: uncharacterized protein LOC101499614 n_1 Tax_Cicer arietinum RepID_UPI000640C0CB	#N/A	#N/A	Medtr4g066130.1	AMP-binding enzyme
Ca05786	Ca6	50569046	50580459	-0.807668	5.1543	-6.3341	1.71176e-06	5.1437e-05	5.01744	Uncharacterized protein n_2 Tax_Glycine max RepID_K7LT74_SOYBN	AT2G25630.1	beta glucosidase 14	Medtr4g066340.1	cyanogenic beta-glucosidase%2C putative
Ca05714	Ca6	50836585	50839286	-0.748524	4.13052	-4.75097	8.35629e-05	0.000786656	1.1937	PREDICTED: UDP-glucose iridoid glucosyltransferase-like n_1 Tax_Cicer arietinum RepID_UPI00032A5C3F	AT3G46670.1	UDP-glucosyl transferase 76E11	Medtr4g064987.2	UDP-glucosyltransferase family protein
Ca05713	Ca6	50846728	50848535	-0.654587	3.58674	-6.02651	3.57976e-06	8.71855e-05	4.34334	No Hits	AT2G26975.1	Ctr copper transporter family	Medtr4g064963.1	Ctr family copper transporter
Ca05712	Ca6	50884563	50886580	0.522978	5.62375	4.70573	9.36057e-05	0.000849169	1.04264	Ras-related protein Rab2BV n_37 Tax_Mesangiospermae RepID_RB2BV_BETVU	AT1G07410.1	RAB GTPase homolog A2B	Medtr4g064897.1	RAB GTPase-like protein A1D
Ca05755	Ca6	50958909	50960974	1.15941	2.47461	10.1646	4.7955e-10	2.22264e-07	13.158	PREDICTED: transcription factor PCL1-like n_1 Tax_Cicer arietinum RepID_UPI00032A6498	AT3G46640.2	Homeodomain-like superfamily protein	Medtr4g064730.1	myb-like DNA-binding domain%2C shaqkyf class protein
Ca05756	Ca6	50962992	50969353	0.576477	4.66898	5.72496	7.45032e-06	0.000141881	3.55763	PREDICTED: pumilio homolog 2-like n_1 Tax_Cicer arietinum RepID_UPI00032A6F47	AT2G29190.2	pumilio 2	Medtr4g064670.1	pumilio Mpt5 protein%2C putative
Ca05735	Ca6	51317918	51318875	0.884414	0.691522	5.73511	7.2678e-06	0.000139812	3.79717	PREDICTED: 40S ribosomal protein S28-1-like n_2 Tax_Cicer arietinum RepID_UPI00032A504D	AT5G03850.1	Nucleic acid-binding, OB-fold-like protein	Medtr4g081180.1	40S ribosomal protein S28-1
Ca06031	Ca6	51404462	51566448	-1.46981	0.0216518	-5.38546	1.7176e-05	0.000251877	2.8478	PREDICTED: protein NRT1/ PTR FAMILY 5.6-like n_1 Tax_Cicer arietinum RepID_UPI00032AA58F	AT4G23160.1	cysteine-rich RLK (RECEPTOR-like protein kinase) 8	Medtr4g019580.1	peptide/nitrate transporter plant
Ca05928	Ca6	51974924	51978066	0.789853	3.69459	7.42094	1.38313e-07	1.06849e-05	7.5525	PREDICTED: H/ACA ribonucleoprotein complex non-core subunit NAF1-like n_1 Tax_Cicer arietinum RepID_UPI00032AA7DA	AT1G03530.1	nuclear assembly factor 1	Medtr0072s0050.1	Gar1/Naf1 RNA-binding region protein
Ca05791	Ca6	52062673	52064526	0.710876	4.43707	8.0976	3.12089e-08	3.97784e-06	9.01585	PREDICTED: uncharacterized protein LOC101507951 n_1 Tax_Cicer arietinum RepID_UPI00032AB800	AT4G28210.1	embryo defective 1923	Medtr4g046023.1	embryo defective 1923 protein%2C putative
Ca05832	Ca6	52928517	52931031	-0.764922	7.15926	-4.94715	5.11236e-05	0.000553343	1.63943	Photosystem II protein D1 n_12378 Tax_root RepID_PSBA_ARATH	ATCG00020.1	photosystem II reaction center protein A	Medtr4g051290.1	photosystem II Q(B) protein
Ca05905	Ca6	53724697	53728855	0.63671	4.917	6.33493	1.70839e-06	5.1437e-05	5.02761	PREDICTED: BTB/POZ domain-containing protein At3g22104 isoform X1 n_2 Tax_Cicer arietinum RepID_UPI00032A7EAF	AT3G22104.1	Phototropic-responsive NPH3 family protein	Medtr4g045767.1	phototropic-responsive NPH3 family protein
Ca06318	Ca6	54759067	54760737	0.560382	1.55036	4.68388	9.88808e-05	0.000875728	1.27477	PREDICTED: uncharacterized protein At2g39795 - mitochondrial isoform X1 n_2 Tax_Cicer arietinum RepID_UPI00032AB76F	AT1G15870.1	Mitochondrial glycoprotein family protein	Medtr4g006560.1	glycoprotein family protein
Ca06042	Ca6	56163389	56166245	0.292247	4.35023	5.57282	1.08196e-05	0.000179291	3.2054	PREDICTED: probable xyloglucan endotransglucosylase/hydrolase protein 28 n_2 Tax_Cicer arietinum RepID_UPI00032ABB5E	AT1G14720.1	xyloglucan endotransglucosylase/hydrolase 28	Medtr1g033420.1	xyloglucan endotransglucosylase/hydrolase family protein
Ca06080	Ca6	56596180	56600465	-0.332111	3.96667	-5.15811	3.01991e-05	0.000377983	2.20931	PREDICTED: traB domain-containing protein-like n_1 Tax_Cicer arietinum RepID_UPI00032ACC73	AT1G05270.1	TraB family protein	Medtr4g046707.1	TraB family protein
Ca06222	Ca6	59850957	59851727	-0.59591	8.55162	-6.59102	9.31996e-07	3.46834e-05	5.60734	PREDICTED: tetrapyrrole-binding protein - chloroplastic n_1 Tax_Cicer arietinum RepID_UPI00032AA8EA	AT3G59400.1	enzyme binding;tetrapyrrole binding	Medtr4g067150.1	tetrapyrrole-binding protein
Ca06213	Ca6	59923194	59925955	-0.591522	7.59634	-8.93872	5.33839e-09	1.1185e-06	10.7677	PREDICTED: B-box zinc finger protein 24 n_1 Tax_Cicer arietinum RepID_UPI00032A788A	AT1G06040.2	B-box zinc finger family protein	Medtr4g067320.1	salt tolerance-like protein
Ca06275	Ca6	60039642	60047517	0.535068	4.35755	4.774	7.88739e-05	0.000757774	1.21947	PREDICTED: ribosome biogenesis protein BMS1 homolog n_1 Tax_Cicer arietinum RepID_UPI00032A5928	AT1G06720.1	P-loop containing nucleoside triphosphate hydrolases superfamily protein	Medtr4g068150.2	P-loop nucleoside triphosphate hydrolase superfamily protein
Ca06240	Ca6	60091803	60094592	0.751962	0.99799	4.89302	5.85387e-05	0.000615783	1.89499	PREDICTED: B3 domain-containing transcription factor VRN1-like isoform X1 n_2 Tax_Cicer arietinum RepID_UPI00032A66D1	AT3G18990.1	AP2/B3-like transcriptional factor family protein	Medtr4g068320.1	B3 domain transcription factor VRN1-like protein
Ca06299	Ca6	60301509	60305469	-0.408737	9.15752	-5.99751	3.83965e-06	9.10504e-05	4.17233	PREDICTED: protein TIC 62 - chloroplastic isoform X1 n_2 Tax_Cicer arietinum RepID_UPI0006411108	AT3G18890.1	NAD(P)-binding Rossmann-fold superfamily protein	Medtr4g068970.1	NAD-dependent epimerase/dehydratase family protein
Ca06314	Ca6	60737772	60743432	0.514277	5.28989	4.69471	9.62286e-05	0.000861203	1.01467	PREDICTED: putative rRNA methyltransferase n_1 Tax_Cicer arietinum RepID_UPI00032A95C3	AT4G25730.1	FtsJ-like methyltransferase family protein	Medtr4g078640.1	adoMet-dependent rRNA methyltransferase Spb1
Ca06341	Ca6	60869854	60871682	0.353781	6.58586	5.19744	2.73841e-05	0.000351671	2.26148	PREDICTED: 40S ribosomal protein S25-2-like - partial n_1 Tax_Eucalyptus grandis RepID_UPI0005274355	AT2G16360.1	Ribosomal protein S25 family protein	Medtr4g070600.2	ribosomal protein S25
Ca06380	Ca6	60920159	60924027	0.765562	4.99935	4.85041	6.51288e-05	0.000666764	1.40105	PREDICTED: probable nucleolar protein 5-1 n_1 Tax_Cicer arietinum RepID_UPI00032A69AB	AT3G05060.1	NOP56-like pre RNA processing ribonucleoprotein	Medtr5g010260.1	NOP56-like pre RNA processing ribonucleoprotein
Ca06355	Ca6	61055731	61059997	-0.551217	5.4869	-5.58648	1.04621e-05	0.000175982	3.2129	PREDICTED: uncharacterized protein LOC101492915 n_1 Tax_Cicer arietinum RepID_UPI00032A6C93	AT2G21370.1	xylulose kinase-1	Medtr4g071230.1	xylulose kinase-like protein
Ca06374	Ca6	61079309	61099937	-0.402489	6.9561	-6.95024	4.03742e-07	2.11481e-05	6.45996	PREDICTED: MATE efflux family protein 4 - chloroplastic-like n_1 Tax_Cicer arietinum RepID_UPI00032AB09B	AT5G25400.1	Nucleotide-sugar transporter family protein	Medtr3g107470.1	nucleotide/sugar transporter family protein
Ca06373	Ca6	61128053	61131829	0.227346	4.9344	4.71451	9.15665e-05	0.000835626	1.06508	Clathrin-binding protein - putative n_10 Tax_Papilionoideae RepID_G7JJT6_MEDTR	AT4G34660.3	SH3 domain-containing protein	Medtr4g071540.1	clathrin-binding protein%2C putative
Ca06398	Ca6	61247914	61249931	0.474822	7.28076	6.26515	2.01776e-06	5.82253e-05	4.85275	Uncharacterized protein n_3 Tax_Soja RepID_K7LSV9_SOYBN	AT1G75630.1	vacuolar H+-pumping ATPase 16 kDa proteolipid subunit 4, proton transmembrane transport	Medtr5g021690.2	vacuolar H+-pumping ATPase 16 kDa proteolipid subunit 4
Ca06413	Ca6	61506314	61508558	0.618832	7.23825	7.02914	3.36703e-07	1.8659e-05	6.63844	PREDICTED: uncharacterized protein LOC101511801 n_1 Tax_Cicer arietinum RepID_UPI00032A7284	AT4G27990.1	YGGT family protein	Medtr4g005520.1	YGGT family protein
Ca06429	Ca6	61720964	61722434	0.525702	2.31849	5.64083	9.15516e-06	0.000160767	3.5324	PREDICTED: uncharacterized protein LOC101490204 n_1 Tax_Cicer arietinum RepID_UPI00032AAFBB	AT3G63390.1	#N/A	Medtr7g095740.1	hypothetical protein
Ca06405	Ca6	61831543	61833322	0.742101	3.50177	6.73159	6.70516e-07	2.84087e-05	6.02575	Beta-1 -4-mannosyl-glycoprotein 4-beta-N-acetylglucosaminyltransferase n_14 Tax_Papilionoideae RepID_A0A0B2PB24_GLYSO	AT1G67880.1	beta-1,4-N-acetylglucosaminyltransferase family protein	Medtr8g089840.1	beta-1%2C4-N-acetylglucosaminyltransferase-like protein
Ca06462	Ca6	61881947	61883388	0.461742	5.66448	5.51857	1.23651e-05	0.000196718	3.04908	60S acidic ribosomal protein n_2 Tax_Papilionoideae RepID_I3T2S0_MEDTR	AT5G57290.3	60S acidic ribosomal protein family	Medtr8g089790.1	60S acidic ribosomal protein
Ca06450	Ca6	62060291	62077709	0.318278	4.69668	5.13549	3.19491e-05	0.000391555	2.11097	PREDICTED: lysine histidine transporter-like 8 n_1 Tax_Cicer arietinum RepID_UPI000641412E	AT1G67730.1	beta-ketoacyl reductase 1	Medtr8g089575.1	enoyl-(acyl carrier) reductase
Ca06483	Ca6	62160703	62164583	0.552298	5.01948	6.97949	3.77426e-07	2.01844e-05	6.52737	UDP-D-glucose/UDP-D-galactose 4-epimerase n_2 Tax_Papilionoideae RepID_G7L9K1_MEDTR	AT1G30620.2	NAD(P)-binding Rossmann-fold superfamily protein	Medtr8g089180.3	UDP-D-glucose/UDP-D-galactose 4-epimerase
Ca06444	Ca6	62226189	62230235	0.270314	3.99814	5.10366	3.45863e-05	0.000413926	2.0603	PREDICTED: phosphatidylinositol 4-phosphate 5-kinase 7-like n_1 Tax_Cicer arietinum RepID_UPI00032A839F	AT1G10900.1	Phosphatidylinositol-4-phosphate 5-kinase family protein	Medtr8g088930.10	phosphatidylinositol-4-phosphate 5-kinase family protein
Ca06441	Ca6	62265160	62269247	-0.592826	5.4831	-5.5303	1.20131e-05	0.000192866	3.0757	PREDICTED: aminomethyltransferase - mitochondrial n_1 Tax_Cicer arietinum RepID_UPI00032ACB22	AT1G60990.3	Glycine cleavage T-protein family	Medtr8g088790.1	glycine cleavage T-protein aminomethyltransferase
Ca06471	Ca6	62515654	62518257	-0.327045	9.67193	-6.29575	1.8756e-06	5.48515e-05	4.8681	PREDICTED: uncharacterized protein LOC101499502 n_1 Tax_Cicer arietinum RepID_UPI00032AD213	AT1G55480.1	protein containing PDZ domain, a K-box domain, and a TPR region	Medtr8g088420.2	tyrosine phosphatase%2C putative
Ca06469	Ca6	62557469	62562785	1.68299	0.47039	10.2875	3.80437e-10	1.9396e-07	13.0805	PREDICTED: homeobox-leucine zipper protein ATHB-14-like n_1 Tax_Cicer arietinum RepID_UPI00032AD400	AT1G30490.1	Homeobox-leucine zipper family protein / lipid-binding START domain-containing protein	Medtr2g030130.1	class III homeodomain leucine zipper protein
Ca06517	Ca6	62616159	62624874	0.345454	5.31649	5.59565	1.02291e-05	0.000173172	3.23614	Uncharacterized protein n_2 Tax_Brassica RepID_M4FAY6_BRARP	AT3G20050.1	T-complex protein 1 alpha subunit	Medtr8g088270.1	TCP-1/cpn60 chaperonin family protein
Ca06600	Ca6	62692482	62696415	0.770043	5.29932	6.10803	2.94104e-06	7.64875e-05	4.47828	PREDICTED: cold-regulated 413 inner membrane protein 1 - chloroplastic-like isoform X2 n_1 Tax_Cicer arietinum RepID_UPI00032A93A8	#N/A	#N/A	Medtr8g088110.1	cold acclimation protein WCOR413
Ca06559	Ca6	62910526	62912358	0.922158	1.90082	6.72769	6.76648e-07	2.85106e-05	6.10053	No Hits	#N/A	#N/A	#N/A
Ca06563	Ca6	62948968	62951877	-0.51848	4.75505	-4.7365	8.66506e-05	0.000806647	1.13269	Glutathione S-transferase n_2 Tax_Medicago truncatula RepID_A0A072U4C4_MEDTR	AT2G29420.1	glutathione S-transferase tau 7	Medtr8g087425.1	glutathione S-transferase
Ca06589	Ca6	63396135	63400440	0.586457	2.37691	4.91298	5.56864e-05	0.000592492	1.76586	PREDICTED: glucan endo-1 -3-beta-glucosidase 4 n_1 Tax_Cicer arietinum RepID_UPI00032A770B	AT3G13560.3	O-Glycosyl hydrolases family 17 protein	Medtr8g085720.3	O-glycosyl hydrolase family 17 protein
Ca06588	Ca6	63410184	63416186	0.597938	3.91912	5.35902	1.83377e-05	0.000263207	2.68701	Acyl-activating enzyme 17 - peroxisomal protein - putative n_4 Tax_Papilionoideae RepID_G7LHZ3_MEDTR	AT1G55320.1	acyl-activating enzyme 18	Medtr8g085680.2	acyl-activating enzyme 17%2C peroxisomal protein%2C putative
Ca06603	Ca6	63497186	63506197	-0.515293	5.96075	-5.60307	1.00443e-05	0.000171844	3.25697	PREDICTED: thiamine thiazole synthase - chloroplastic-like n_1 Tax_Cicer arietinum RepID_UPI00032A7CBF	AT5G54770.1	thiazole biosynthetic enzyme, chloroplast (ARA6) (THI1) (THI4)	Medtr4g081130.1	thiazole biosynthetic enzyme
Ca06632	Ca6	63710609	63712136	1.61076	6.58234	5.48279	1.35052e-05	0.000209708	2.9593	Chalcone synthase 1 n_27 Tax_Pentapetalae RepID_CHS1_SOYBN	AT5G13930.1	Chalcone and stilbene synthase family protein	Medtr3g083910.1	chalcone and stilbene synthase family protein
Ca06668	Ca6	63806195	63808659	0.741128	9.1115	6.55596	1.01215e-06	3.69379e-05	5.49747	Adenosylhomocysteinase n_2 Tax_Erythranthe guttata RepID_A0A022QW37_ERYGU	AT4G13940.2	S-adenosyl-L-homocysteine hydrolase	Medtr8g083090.1	S-adenosyl-L-homocysteine hydrolase
Ca06674	Ca6	63850667	63860037	-0.565909	4.71356	-4.69293	9.66604e-05	0.000863564	1.01529	Long-chain-fatty-acid CoA ligase (AMP-forming) n_1 Tax_Medicago truncatula RepID_G7LH35_MEDTR	AT3G23790.1	AMP-dependent synthetase and ligase family protein	Medtr8g083170.1	long-chain-fatty-acid CoA ligase (AMP-forming)
Ca06645	Ca6	63930023	63935227	-0.395716	4.03637	-4.81412	7.1328e-05	0.000705667	1.33192	PREDICTED: protein TIC 22-like - chloroplastic n_1 Tax_Cicer arietinum RepID_UPI00032AC752	AT3G23710.1	Tic22-like family protein	Medtr8g081030.1	Tic22 family protein
Ca06613	Ca6	64176250	64177894	-0.366879	5.11477	-5.20128	2.71237e-05	0.000349207	2.26631	PREDICTED: F-box protein At1g67340-like n_1 Tax_Cicer arietinum RepID_UPI00032AB9AF	AT1G67340.1	HCP-like superfamily protein with MYND-type zinc finger	Medtr8g080640.1	HCP family protein with MYND-type zinc finger protein
Ca06680	Ca6	64234781	64254224	0.638514	7.34754	4.78217	7.72743e-05	0.000747422	1.22951	PREDICTED: endoplasmic reticulum metallopeptidase 1 n_2 Tax_Cicer arietinum RepID_UPI00032AC920	AT1G27400.1	Ribosomal protein L22p/L17e family protein	Medtr8g080470.1	endoplasmic reticulum metallopeptidase-like protein
Ca06742	Ca6	64774944	64776804	-1.11876	5.32036	-10.698	1.77992e-10	1.51244e-07	14.1344	PREDICTED: butyrate--CoA ligase AAE11 - peroxisomal-like n_1 Tax_Cicer arietinum RepID_UPI00032AC765	AT1G65890.1	acyl activating enzyme 12	Medtr3g064420.1	long-chain acyl-CoA synthetase
Ca06728	Ca6	64818850	64820376	0.743263	2.62648	9.19061	3.20334e-09	7.65548e-07	11.2943	PREDICTED: expansin-A13-like n_1 Tax_Cicer arietinum RepID_UPI00032A9A40	AT3G03220.1	expansin A13	Medtr3g064510.1	expansin A1
Ca06688	Ca6	64895874	64903773	-0.902896	6.01588	-7.864	5.18206e-08	5.29055e-06	8.50645	Glutamate decarboxylase n_13 Tax_Papilionoideae RepID_A8C8H5_SOYBN	AT5G17330.1	glutamate decarboxylase	Medtr3g064740.1	glutamate decarboxylase
Ca06687	Ca6	64916859	64922670	0.360786	4.04086	5.6239	9.54355e-06	0.000164936	3.33824	PREDICTED: serine/threonine-protein kinase rio2 n_1 Tax_Cicer arietinum RepID_UPI00032A9B5B	AT3G51270.1	protein serine/threonine kinases;ATP binding;catalytics	Medtr4g094615.2	Serine/Threonine-kinase rio2
Ca06744	Ca6	65000024	65002271	0.532803	5.30086	6.03756	3.48557e-06	8.54711e-05	4.30832	PREDICTED: 60S ribosomal export protein NMD3 n_1 Tax_Cicer arietinum RepID_UPI00032ACBE9	AT2G03820.1	nonsense-mediated mRNA decay NMD3 family protein	Medtr3g064880.1	nonsense-mediated mRNA decay NMD3 family protein
Ca06747	Ca6	65004830	65006711	-0.57072	4.8353	-6.35267	1.63773e-06	5.0506e-05	5.0668	PREDICTED: uncharacterized oxidoreductase At4g09670-like n_1 Tax_Cicer arietinum RepID_UPI00032AB56B	AT1G66130.1	NAD(P)-binding Rossmann-fold superfamily protein	Medtr3g064900.1	oxidoreductase family%2C NAD-binding rossmann fold protein
Ca06700	Ca6	65119164	65129382	0.723695	0.842331	4.53135	0.000145021	0.00115582	1.0299	PREDICTED: nephrocystin-3 n_1 Tax_Cicer arietinum RepID_UPI00064101D9	AT5G37590.1	Tetratricopeptide repeat (TPR)-like superfamily protein	Medtr3g065220.1	TPR repeat protein
Ca06701	Ca6	65133924	65138060	0.549298	4.16853	4.87372	6.14365e-05	0.000637992	1.51301	Glutamine synthetase PR-1 n_10 Tax_Pentapetalae RepID_GLNA1_PHAVU	AT5G16570.1	glutamine synthetase 1;4	Medtr3g065250.1	glutamine synthetase domain protein
Ca06719	Ca6	65251347	65252611	-1.35207	1.04678	-5.84314	5.58418e-06	0.000117322	4.01944	PREDICTED: HMG-Y-related protein A-like n_1 Tax_Cicer arietinum RepID_UPI00032AD34B	AT1G14900.1	high mobility group A	Medtr3g065570.1	linker histone H1 and h5 family protein
Ca06726	Ca6	65343214	65348817	-0.678935	5.46227	-5.15497	3.04362e-05	0.000378773	2.15262	PREDICTED: protein PTST - chloroplastic n_1 Tax_Cicer arietinum RepID_UPI00032A7097	#N/A	#N/A	Medtr3g065930.1	5'-AMP-activated kinase-like protein%2C putative
Ca06767	Ca6	65395331	65398847	-0.61801	4.16732	-5.66697	8.58671e-06	0.000154148	3.45496	Armadillo/beta-catenin repeat protein n_2 Tax_Papilionoideae RepID_A0A072UZV6_MEDTR	AT3G03440.1	ARM repeat superfamily protein	Medtr3g067685.1	armadillo/beta-catenin repeat protein
Ca06755	Ca6	65502734	65507580	-0.611118	6.00619	-7.56318	1.00634e-07	8.50388e-06	7.84422	PREDICTED: telomere repeat-binding protein 4-like n_1 Tax_Cicer arietinum RepID_UPI00032A6FE7	AT5G13820.1	telomeric DNA binding protein 1	Medtr3g067935.1	double-strand telomere-binding protein%2C putative
Ca06764	Ca6	65598940	65601148	-0.502552	3.49328	-6.62897	8.52528e-07	3.24364e-05	5.78437	PREDICTED: E3 ubiquitin-protein ligase RING1 n_1 Tax_Cicer arietinum RepID_UPI00032A670A	AT2G39720.1	RING-H2 finger C2A	Medtr3g068005.1	E3 ubiquitin-protein ligase RING1-like protein
Ca06774	Ca6	65744880	65747251	2.23747	2.09853	6.38522	1.51579e-06	4.81995e-05	5.33456	Protein phosphatase 2C-like protein n_2 Tax_Papilionoideae RepID_A0A072V045_MEDTR	AT1G07430.1	highly ABA-induced PP2C gene 2,negative regulation of abscisic acid-activated signaling pathway, positive regulation of gibberellic acid mediated signaling pathway	Medtr3g068200.1	protein phosphatase 2C-like protein
Ca06786	Ca6	65830715	65834033	-0.612711	3.23067	-5.61216	9.8225e-06	0.000168804	3.37007	PREDICTED: folylpolyglutamate synthase-like isoform X1 n_3 Tax_Cicer arietinum RepID_UPI00064161F2	AT5G05980.2	DHFS-FPGS homolog B	Medtr3g069160.4	folylpolyglutamate synthase
Ca15055	Ca7	247262	250352	0.390319	1.90733	5.09753	3.51194e-05	0.000418995	2.33526	PREDICTED: uncharacterized protein At3g49720 isoform X1 n_2 Tax_Cicer arietinum RepID_UPI00032A8347	AT3G49720.2	#N/A	Medtr4g097530.1	transmembrane protein%2C putative
Ca15081	Ca7	667481	668521	-1.66363	0.852438	-5.31334	2.05351e-05	0.000284239	2.86511	PREDICTED: uncharacterized protein DDB_G0271670 n_1 Tax_Cicer arietinum RepID_UPI00032A5163	#N/A	#N/A	Medtr4g095320.1	hypothetical protein
Ca15109	Ca7	808819	815248	-0.630049	1.54522	-5.61463	9.76327e-06	0.000168164	3.56008	PREDICTED: protein MRG1 isoform X1 n_2 Tax_Cicer arietinum RepID_UPI00032A78E0	AT4G37280.1	MRG family protein	Medtr4g094988.1	chromatin-binding protein
Ca15140	Ca7	1184624	1194037	0.254517	5.60195	5.42193	1.56948e-05	0.000235613	2.81085	Nicotinate phosphoribosyltransferase-like protein n_2 Tax_Medicago truncatula RepID_Q6XQM5_MEDTR	AT2G23420.1	nicotinate phosphoribosyltransferase 2	Medtr4g094805.2	nicotinate phosphoribosyltransferase-like protein
Ca15142	Ca7	1272497	1279083	-0.444774	9.97432	-5.83976	5.63031e-06	0.000118128	3.75705	PREDICTED: zeaxanthin epoxidase - chloroplastic-like n_1 Tax_Cicer arietinum RepID_UPI00032A6709	AT5G67030.1	zeaxanthin epoxidase (ZEP) (ABA1)	Medtr5g017350.1	zeaxanthin epoxidase
Ca15159	Ca7	1397527	1398564	0.447475	3.01837	5.22718	2.5432e-05	0.000333033	2.44381	PREDICTED: uncharacterized protein LOC101506355 n_3 Tax_Cicer arietinum RepID_UPI00032A533A	AT5G66860.1	Ribosomal protein L25/Gln-tRNA synthetase, anti-codon-binding domain	Medtr8g079680.1	50S ribosomal protein L25%2C putative
Ca15163	Ca7	1401799	1418267	-0.261469	4.28793	-5.48112	1.35608e-05	0.000210358	2.97219	PREDICTED: uncharacterized protein LOC101506676 isoform X1 n_2 Tax_Cicer arietinum RepID_UPI00032ACBB8	AT3G16610.1	pentatricopeptide (PPR) repeat-containing protein	Medtr1g085700.1	pentatricopeptide (PPR) repeat protein%2C putative
Ca15168	Ca7	1581594	1582681	-0.568332	2.56634	-4.59582	0.000123344	0.0010253	1.03573	3-ketoacyl-CoA reductase n_2 Tax_Papilionoideae RepID_G7ZY42_MEDTR	AT3G50560.1	NAD(P)-binding Rossmann-fold superfamily protein	Medtr8g079810.1	short-chain dehydrogenase-reductase
Ca15182	Ca7	1626949	1631992	0.893468	1.79517	5.12979	3.24062e-05	0.00039684	2.38576	PREDICTED: peptidyl-prolyl cis-trans isomerase CYP40-like n_1 Tax_Cicer arietinum RepID_UPI00032ABA40	AT2G15790.1	peptidyl-prolyl cis-trans isomerase / cyclophilin-40 (CYP40) / rotamase	Medtr8g079690.1	peptidyl-prolyl cis-trans isomerase D
Ca15184	Ca7	1643396	1675080	0.486306	3.38091	5.21805	2.60162e-05	0.000337791	2.37961	PREDICTED: uncharacterized protein LOC101506355 n_3 Tax_Cicer arietinum RepID_UPI00032A533A	AT5G66860.1	Ribosomal protein L25/Gln-tRNA synthetase, anti-codon-binding domain	Medtr8g079680.1	50S ribosomal protein L25%2C putative
Ca15230	Ca7	2235799	2237610	1.09265	0.763526	6.88066	4.74161e-07	2.30231e-05	6.28615	PREDICTED: protein LYK5 n_1 Tax_Cicer arietinum RepID_UPI00032A7A8F	AT2G23770.1	protein kinase family protein / peptidoglycan-binding LysM domain-containing protein	Medtr8g078300.1	Nod-factor receptor 5%2C putative
Ca15243	Ca7	2321530	2325660	-1.15214	4.3898	-7.5503	1.03563e-07	8.65568e-06	7.82321	PPR containing plant-like protein n_1 Tax_Medicago truncatula RepID_G7LFI5_MEDTR	AT2G23790.1	Protein of unknown function (DUF607)	Medtr8g078170.1	PPR containing plant-like protein
Ca15254	Ca7	2418080	2419675	-0.466783	4.50993	-5.84508	5.55794e-06	0.000116931	3.85621	GRAS family transcription factor n_2 Tax_Papilionoideae RepID_G7LEV2_MEDTR	AT4G36710.1	GRAS family transcription factor	Medtr8g077940.1	GRAS family transcription factor
Ca15268	Ca7	2653294	2657011	-1.84022	2.06484	-5.90646	4.78747e-06	0.00010751	4.24107	Alpha/beta fold hydrolase n_3 Tax_Papilionoideae RepID_G7LDX9_MEDTR	AT2G18360.1	alpha/beta-Hydrolases superfamily protein	Medtr8g077290.2	alpha/beta fold hydrolase
Ca15291	Ca7	2714045	2714585	-1.32633	5.66373	-5.07723	3.6943e-05	0.000434983	1.96311	MYB family transcription factor n_1 Tax_Medicago truncatula RepID_G7LDZ2_MEDTR	AT4G39250.1	RAD-like 1	Medtr8g077420.1	MYB family transcription factor
Ca15289	Ca7	2715805	2720539	-0.332614	4.005	-4.67528	0.000101038	0.00088968	1.00926	Exosome complex exonuclease RRP41 n_7 Tax_Papilionoideae RepID_G7LDZ3_MEDTR	AT3G07750.2	3'-5'-exoribonuclease family protein	Medtr8g077430.4	exosome complex exonuclease RRP41
Ca15296	Ca7	2792886	2796721	-0.395853	5.5775	-4.98943	4.59964e-05	0.00051249	1.74285	PREDICTED: uncharacterized protein LOC101495383 n_1 Tax_Cicer arietinum RepID_UPI00032A7579	AT3G50910.1	#N/A	Medtr8g077135.3	plant/F18B3-190 protein%2C putative
Ca15317	Ca7	3045941	3046282	0.391293	3.10416	4.83975	6.68914e-05	0.000677552	1.48885	PREDICTED: uncharacterized protein LOC101508710 n_1 Tax_Cicer arietinum RepID_UPI00032A564D	#N/A	#N/A	Medtr8g076660.1	amine-terminal oxidoreductase-like protein
Ca15332	Ca7	3124276	3152195	-0.336472	4.59707	-5.6884	8.14771e-06	0.000149245	3.47157	PREDICTED: MORC family CW-type zinc finger protein 4-like n_1 Tax_Cicer arietinum RepID_UPI00032AB905	AT4G23160.1	cysteine-rich RLK (RECEPTOR-like protein kinase) 8	Medtr3g093120.1	SPFH domain/band 7 family protein
Ca15336	Ca7	3256176	3261033	-0.332516	4.13253	-5.14547	3.1165e-05	0.00038441	2.15805	PREDICTED: uncharacterized protein LOC101512131 n_1 Tax_Cicer arietinum RepID_UPI00032AC73E	AT3G54350.3	Forkhead-associated (FHA) domain-containing protein	Medtr8g076470.2	amine-terminal domain micro-spherule protein
Ca15349	Ca7	3383622	3386346	0.535056	5.92219	5.9422	4.38993e-06	0.000101888	4.08011	Uncharacterized protein n_3 Tax_Soja RepID_K7LSV9_SOYBN	AT1G19910.1	ATPase, F0/V0 complex, subunit C protein	Medtr5g021690.2	vacuolar H+-pumping ATPase 16 kDa proteolipid subunit 4
Ca15355	Ca7	3421800	3425056	-0.318007	4.83002	-6.35264	1.63786e-06	5.0506e-05	5.06195	Uncharacterized protein n_4 Tax_Papilionoideae RepID_I1MN67_SOYBN	AT2G17990.1	PTHR31161:SF6 - KINECTIN-RELATED PROTEIN (1 of 3)	Medtr8g076020.3	calcium-dependent kinase CPK1 adapter protein%2C putative
Ca15456	Ca7	4561965	4567426	-0.596279	4.71226	-5.01284	4.33841e-05	0.000490524	1.81161	Glutamate receptor n_3 Tax_Papilionoideae RepID_G7L8P7_MEDTR	AT3G51480.1	glutamate receptor 3.6	Medtr8g073210.2	glutamate receptor 3.2
Ca15497	Ca7	4968029	4977081	-0.968444	4.6707	-10.4946	2.5869e-10	1.58267e-07	13.7663	Kinesin-like calmodulin-binding protein n_2 Tax_Papilionoideae RepID_G7L7W2_MEDTR	AT5G65930.3	kinesin-like calmodulin-binding protein (ZWICHEL)	Medtr8g072430.1	kinesin-like calmodulin-binding protein
Ca15535	Ca7	5305578	5313658	0.584444	2.08704	5.25662	2.36384e-05	0.000316039	2.60776	60S ribosomal protein L13 n_16 Tax_Papilionoideae RepID_G7KWF6_MEDTR	AT5G23900.1	Ribosomal protein L13e family protein	Medtr7g056020.1	F-box/RNI/FBD-like domain protein
Ca15531	Ca7	5363050	5370923	-0.889874	2.53164	-5.38476	1.72059e-05	0.000252072	2.9621	PREDICTED: mechanosensitive ion channel protein 10-like n_1 Tax_Cicer arietinum RepID_UPI00064112B9	AT5G12080.3	mechanosensitive channel of small conductance-like 10, anion transport	Medtr8g071250.1	mechanosensitive ion channel family protein
Ca15548	Ca7	5580535	5582688	0.531566	1.29747	4.57966	0.000128451	0.00105684	1.10981	PREDICTED: H/ACA ribonucleoprotein complex subunit 3-like protein n_1 Tax_Cicer arietinum RepID_UPI00032ACD02	#N/A	#N/A	#N/A
Ca15572	Ca7	5868343	5875357	-1.61824	1.46013	-4.8152	7.11358e-05	0.000704677	1.52658	PREDICTED: phosphate transporter PHO1 homolog 1 n_1 Tax_Cicer arietinum RepID_UPI00032A875C	AT1G68740.1	EXS (ERD1/XPR1/SYG1) family protein	Medtr8g069955.3	phosphate transporter PHO1-like protein
Ca15578	Ca7	5926352	5929814	0.534275	3.57744	6.12986	2.79057e-06	7.37164e-05	4.58688	PREDICTED: protein LTV1 homolog n_2 Tax_Cicer arietinum RepID_UPI00032A4EDB	AT3G49990.1	K14798 - protein LTV1 (LTV1) (1 of 1)	Medtr4g022890.1	Low temperature viability protein%2C putative
Ca15600	Ca7	6169975	6175346	0.369733	6.90238	7.73693	6.84885e-08	6.54708e-06	8.22959	PREDICTED: uncharacterized protein LOC101491296 n_1 Tax_Cicer arietinum RepID_UPI00032AB383	#N/A	#N/A	Medtr8g070680.1	transmembrane protein%2C putative
Ca15618	Ca7	6390875	6394857	-0.555079	7.47716	-5.62464	9.52625e-06	0.000164824	3.30869	PREDICTED: protein WEAK CHLOROPLAST MOVEMENT UNDER BLUE LIGHT 1-like n_1 Tax_Cicer arietinum RepID_UPI00032AB747	AT2G26570.1	Plant protein of unknown function (DUF827)	Medtr8g070840.1	WEAK movement UNDER BLUE LIGHT-like protein
Ca15655	Ca7	6917026	6920933	-1.36447	1.93213	-6.5276	1.0821e-06	3.86701e-05	5.65845	PREDICTED: uncharacterized protein LOC101509876 n_1 Tax_Cicer arietinum RepID_UPI000640E344	AT1G10750.1	Protein of Unknown Function (DUF239)	Medtr8g069575.1	carboxyl-terminal peptidase
Ca15679	Ca7	7113181	7113627	0.412172	4.86624	6.11997	2.85777e-06	7.49735e-05	4.5087	60S ribosomal protein L27a-3 n_1 Tax_Medicago truncatula RepID_G7LJC8_MEDTR	AT1G23290.1	Ribosomal protein L18e/L15 superfamily protein	Medtr8g069460.1	60S ribosomal protein L27a-3
Ca15710	Ca7	7628819	7630500	-1.17564	0.232062	-5.41784	1.58543e-05	0.000237272	2.97753	PREDICTED: uncharacterized protein LOC101497902 n_1 Tax_Cicer arietinum RepID_UPI00032A626D	#N/A	#N/A	Medtr8g471140.2	hypothetical protein
Ca15707	Ca7	7669237	7669512	-0.602667	2.2792	-5.98564	3.95156e-06	9.29833e-05	4.35147	PREDICTED: protein SKIP34 n_1 Tax_Cicer arietinum RepID_UPI00032A7530	#N/A	#N/A	#N/A
Ca15770	Ca7	8366823	8367560	-0.492204	2.26026	-5.64741	9.00857e-06	0.000159106	3.54959	PREDICTED: RING-H2 finger protein ATL51 n_1 Tax_Cicer arietinum RepID_UPI00064141A9	AT3G03550.1	RING/U-box superfamily protein	Medtr8g066780.1	anaphase-promoting complex subunit 11 RING-H2 finger protein
Ca15790	Ca7	8529755	8534226	-0.255357	5.53315	-5.39728	1.66811e-05	0.000247226	2.74898	Uncharacterized protein n_5 Tax_Phaseoleae RepID_V7CGB2_PHAVU	AT5G46860.1	Syntaxin/t-SNARE family protein	Medtr8g066340.1	syntaxin of plants protein
Ca15794	Ca7	8545413	8550188	-0.537854	1.57146	-5.01392	4.3267e-05	0.000490259	2.12655	PREDICTED: phosphatidylinositol-glycan biosynthesis class X protein isoform X1 n_2 Tax_Cicer arietinum RepID_UPI00032A61BD	#N/A	#N/A	Medtr8g066330.1	PIG-X/PBN1 family protein
Ca15813	Ca7	8744537	8750022	1.05279	4.43602	5.5161	1.24406e-05	0.000197385	3.1181	PREDICTED: polygalacturonase At1g48100-like n_1 Tax_Cicer arietinum RepID_UPI00032A62AA	AT1G10640.1	Pectin lyase-like superfamily protein	Medtr8g065010.1	polygalacturonase plant-like protein
Ca15815	Ca7	8780209	8783835	-0.425736	4.24473	-4.70852	9.2952e-05	0.000845747	1.08016	PREDICTED: pyroglutamyl-peptidase 1 n_1 Tax_Cicer arietinum RepID_UPI000640D4A3	AT1G23440.2	Peptidase C15, pyroglutamyl peptidase I-like	Medtr8g065050.1	pyrrolidone-carboxylate peptidase
Ca15823	Ca7	8831669	8840873	0.886722	3.29995	5.23659	2.48442e-05	0.000327579	2.41577	PREDICTED: DNA-directed RNA polymerase 1B - mitochondrial-like isoform X1 n_2 Tax_Cicer arietinum RepID_UPI00032A6CE5	AT1G68990.2	male gametophyte defective 3	Medtr8g065960.1	DNA-directed RNA polymerase
Ca15879	Ca7	9465648	9470859	0.323025	5.04836	5.17682	2.88251e-05	0.000366789	2.20776	Putative uncharacterized protein (Fragment) n_4 Tax_fabids RepID_Q45NM5_MEDSA	AT1G10590.3	Nucleic acid-binding, OB-fold-like protein	Medtr8g064590.2	nucleic acid-binding%2C OB-fold-like protein
Ca15886	Ca7	9500289	9502743	-1.25154	7.34879	-5.11143	3.39232e-05	0.000407927	2.04782	PREDICTED: probable polygalacturonase non-catalytic subunit JP650 n_1 Tax_Cicer arietinum RepID_UPI00032A90BF	AT1G70370.2	polygalacturonase 2	Medtr8g064560.1	polygalacturonase non-catalytic protein
Ca15906	Ca7	9791553	9797867	0.279634	5.7663	4.71481	9.14961e-05	0.000835482	1.0654	Potassium transporter n_2 Tax_Papilionoideae RepID_A0A072U2G0_MEDTR	AT1G60160.1	Potassium transporter family protein	Medtr8g063840.1	potassium transporter-like protein
Ca15948	Ca7	10350915	10353547	0.635809	4.18767	5.93091	4.51175e-06	0.000103304	4.06256	PREDICTED: uncharacterized protein LOC101503672 n_1 Tax_Cicer arietinum RepID_UPI00032ABA99	AT1G10522.2	#N/A	Medtr8g063150.1	hypothetical protein
Ca15961	Ca7	10421985	10427971	-0.416516	3.04961	-5.69437	8.02944e-06	0.000148143	3.57795	PREDICTED: probable inactive purple acid phosphatase 1 n_1 Tax_Cicer arietinum RepID_UPI0006413967	AT1G13750.1	Purple acid phosphatases superfamily protein	Medtr8g063080.1	inactive purple acid phosphatase-like protein
Ca15964	Ca7	10527777	10534990	0.817277	3.79338	5.66182	8.69589e-06	0.000155197	3.40963	PREDICTED: DEAD-box ATP-dependent RNA helicase 22 n_1 Tax_Cicer arietinum RepID_UPI00032A77A0	AT1G59990.1	DEA(D/H)-box RNA helicase family protein	Medtr8g062720.1	DEAD-box ATP-dependent RNA helicase
Ca15983	Ca7	10595317	10595760	0.457244	5.4227	5.69758	7.96664e-06	0.000147697	3.48517	60S ribosomal protein L27a-3 n_6 Tax_Papilionoideae RepID_G7J4S6_MEDTR	AT1G23290.1	Ribosomal protein L18e/L15 superfamily protein	Medtr5g033090.1	60S ribosomal protein L27a-3
Ca15982	Ca7	10606883	10608721	0.427669	5.67026	5.80548	6.12074e-06	0.00012449	3.74835	60S ribosomal protein L27a-3 n_6 Tax_Papilionoideae RepID_G7J4S6_MEDTR	AT1G23290.1	Ribosomal protein L18e/L15 superfamily protein	Medtr5g033090.1	60S ribosomal protein L27a-3
Ca16025	Ca7	11286745	11296857	0.84272	3.38857	5.21533	2.61921e-05	0.000339231	2.3907	Actin cross-linking protein n_1 Tax_Medicago truncatula RepID_G7LDS6_MEDTR	AT1G59710.1	Protein of unknown function (DUF569)	Medtr8g061880.1	actin cross-linking protein
Ca16034	Ca7	11568686	11579875	-1.13783	1.67813	-6.54299	1.04355e-06	3.76442e-05	5.69349	PREDICTED: protein NRT1/ PTR FAMILY 4.6-like isoform X1 n_2 Tax_Cicer arietinum RepID_UPI00032A528C	AT1G69850.1	nitrate transporter 1:2	Medtr8g469310.1	peptide/nitrate transporter plant
Ca16095	Ca7	12558029	12561380	0.343465	5.373	5.28576	2.19891e-05	0.000299221	2.47544	PREDICTED: uncharacterized protein LOC101498996 n_1 Tax_Cicer arietinum RepID_UPI00032A67D6	AT1G11360.4	Adenine nucleotide alpha hydrolases-like superfamily protein	Medtr1717s0010.1	universal stress family protein
Ca16419	Ca7	18691222	18692300	-0.566757	5.78711	-5.48945	1.32853e-05	0.000207345	2.97619	PREDICTED: uncharacterized protein LOC101502808 n_1 Tax_Cicer arietinum RepID_UPI00032A61FB	AT1G79510.2	Uncharacterized conserved protein (DUF2358)	Medtr8g046460.1	plant/F3O9-12 protein
Ca16446	Ca7	19113859	19141461	0.564059	6.35834	8.85587	6.32621e-09	1.24185e-06	10.6009	PREDICTED: cyclic nucleotide-gated ion channel 4-like isoform X1 n_1 Tax_Cicer arietinum RepID_UPI00032A51FB	AT5G54250.2	cyclic nucleotide-gated cation channel 4	Medtr8g464570.1	cyclic nucleotide-gated ion channel-like protein
Ca16471	Ca7	19383180	19385126	0.864743	2.5868	5.69218	8.07263e-06	0.0001485	3.61315	PREDICTED: pentatricopeptide repeat-containing protein At2g17670 isoform X2 n_1 Tax_Cicer arietinum RepID_UPI00032A98F7	AT2G17670.1	Tetratricopeptide repeat (TPR)-like superfamily protein	Medtr8g005870.1	PPR containing plant-like protein
Ca16506	Ca7	19753172	19786584	0.622317	7.63706	6.76838	6.15402e-07	2.70773e-05	6.03513	PREDICTED: protein ECERIFERUM 1-like n_1 Tax_Cicer arietinum RepID_UPI00032A8772	AT1G02205.1	Fatty acid hydroxylase superfamily	Medtr8g009590.1	fatty acid hydroxylase superfamily protein
Ca16540	Ca7	20138507	20140221	-0.762083	0.787434	-5.77825	6.54103e-06	0.000130175	3.93443	PREDICTED: ubiquitin-like-conjugating enzyme ATG10 n_1 Tax_Cicer arietinum RepID_UPI00032A8E51	AT3G07525.1	autophagocytosis-associated family protein	Medtr8g010140.1	autophagocytosis-associated family protein
Ca16586	Ca7	20566886	20569172	-0.610809	1.11667	-5.67777	8.36255e-06	0.000151885	3.71611	PREDICTED: uncharacterized protein LOC105852572 n_1 Tax_Cicer arietinum RepID_UPI000640C914	AT5G36930.1	Disease resistance protein (TIR-NBS-LRR class) family	Medtr8g037220.2	disease resistance protein (TIR-NBS-LRR class)%2C putative
Ca16611	Ca7	20808753	20810812	-0.72569	5.29011	-7.42091	1.38321e-07	1.06849e-05	7.52705	PREDICTED: GTP cyclohydrolase 1-like n_1 Tax_Cicer arietinum RepID_UPI00032A9341	AT3G07270.2	GTP cyclohydrolase I	Medtr8g012570.1	GTP cyclohydrolase I 1
Ca16602	Ca7	20869553	20872739	-0.910961	3.64838	-6.80402	5.66425e-07	2.55559e-05	6.17282	Ethylene response factor n_1 Tax_Medicago truncatula RepID_A0A072TX66_MEDTR	AT4G13040.1	Integrase-type DNA-binding superfamily protein	Medtr8g012655.2	ethylene response factor
Ca16622	Ca7	21021120	21026705	-0.279871	4.05384	-4.71571	9.12897e-05	0.000834096	1.09919	PREDICTED: ankyrin repeat and SAM domain-containing protein 6 n_1 Tax_Cicer arietinum RepID_UPI00032A71F2	AT3G07170.1	Sterile alpha motif (SAM) domain-containing protein	Medtr8g012995.1	SAM domain protein
Ca16645	Ca7	21316030	21322907	1.31771	2.01264	6.39031	1.49756e-06	4.78188e-05	5.33575	PREDICTED: uncharacterized protein LOC101511720 n_1 Tax_Cicer arietinum RepID_UPI00032AD17C	AT5G18190.1	Protein kinase family protein	Medtr7g006030.1	casein kinase I-like protein
Ca16683	Ca7	21967200	21974015	0.204415	5.26768	5.01927	4.26928e-05	0.000485131	1.81717	Serine/threonine-protein phosphatase 2A 55 kDa regulatory subunit B n_89 Tax_eudicotyledons RepID_A0A0S3SFT0_PHAAN	AT1G17720.1	Protein phosphatase 2A, regulatory subunit PR55	Medtr8g015880.1	protein phosphatase 2A 55 kDa regulatory subunit B
Ca16692	Ca7	21993799	21995745	-1.79003	1.14685	-5.29288	2.16039e-05	0.000295556	2.82374	PREDICTED: inorganic pyrophosphatase 2-like n_2 Tax_Cicer arietinum RepID_UPI00032A8FB9	AT1G17710.2	Pyridoxal phosphate phosphatase-related protein	Medtr8g015950.1	2%2C3-diketo-5-methylthio-1-phosphopentane phosphatase
Ca16696	Ca7	21998106	22005509	-1.84986	1.44891	-6.84184	5.18802e-07	2.41188e-05	6.30726	PREDICTED: inorganic pyrophosphatase 2-like n_2 Tax_Cicer arietinum RepID_UPI00032A8FB9	AT1G17710.1	Pyridoxal phosphate phosphatase-related protein	Medtr8g015910.1	2%2C3-diketo-5-methylthio-1-phosphopentane phosphatase
Ca16694	Ca7	22013894	22028201	-0.64254	5.05673	-5.26669	2.30548e-05	0.000310408	2.43179	PREDICTED: ABC transporter C family member 8 n_1 Tax_Cicer arietinum RepID_UPI00032A6872	AT3G21250.2	multidrug resistance-associated protein 6	Medtr8g015980.1	ABC transporter-like family-protein
Ca16711	Ca7	22266686	22272222	0.831238	3.06758	5.36264	1.8174e-05	0.000261496	2.75794	TCP-1/cpn60 chaperonin family protein n_2 Tax_Papilionoideae RepID_G7LHF7_MEDTR	AT3G13860.1	heat shock protein 60-3A	Medtr8g017080.1	TCP-1/cpn60 chaperonin family protein
Ca16720	Ca7	22292553	22295590	-0.421283	5.08422	-5.74844	7.03484e-06	0.000137769	3.60891	PREDICTED: protein indeterminate-domain 11 isoform X1 n_1 Tax_Cicer arietinum RepID_UPI00032A821B	AT3G50700.1	indeterminate(ID)-domain 2	Medtr8g017210.1	C2H2-like zinc finger protein%2C putative
Ca16761	Ca7	22813138	22817938	0.785928	3.96063	4.74055	8.57758e-05	0.000799964	1.19407	Brevis radix-like protein n_2 Tax_Papilionoideae RepID_A0A072TLT2_MEDTR	AT1G54180.1	BREVIS RADIX-like 3	Medtr8g019620.2	brevis radix-like protein
Ca16810	Ca7	23505431	23507112	0.682535	3.38413	6.36109	1.60528e-06	5.00056e-05	5.15081	PREDICTED: uncharacterized protein LOC101498004 n_1 Tax_Cicer arietinum RepID_UPI00032A95FE	AT1G72510.2	Protein of unknown function (DUF1677)	Medtr8g021190.1	DUF1677 family protein
Ca16839	Ca7	23906078	23917644	-0.768767	4.47064	-10.2534	4.056e-10	2.00118e-07	13.3239	PREDICTED: phosphoinositide phosphatase SAC2-like isoform X1 n_2 Tax_Cicer arietinum RepID_UPI0006415617	AT5G20840.1	Phosphoinositide phosphatase family protein	Medtr8g022740.2	phosphoinositide phosphatase SAC4
Ca16845	Ca7	24002297	24004731	-0.515627	3.73633	-6.76405	6.21648e-07	2.70886e-05	6.0448	PREDICTED: subtilisin-like protease SBT1.6 n_1 Tax_Cicer arietinum RepID_UPI00032A9814	AT3G14240.1	Subtilase family protein	Medtr8g022870.1	subtilisin-like serine protease
Ca16911	Ca7	25100908	25101869	-1.19838	3.91334	-5.02294	4.23029e-05	0.000482493	1.87866	PREDICTED: phytohormone-binding protein-like n_1 Tax_Cicer arietinum RepID_UPI00032AB3D2	#N/A	#N/A	Medtr3g055120.1	pathogenesis-related protein bet V I family protein
Ca16940	Ca7	25610434	25618385	-0.603694	2.30485	-6.8197	5.46164e-07	2.50107e-05	6.30405	PREDICTED: probable UDP-arabinopyranose mutase 5 n_1 Tax_Cicer arietinum RepID_UPI00032AC2FB	AT5G16510.2	Alpha-1,4-glucan-protein synthase family protein	Medtr7g079490.3	alpha-1%2C4-glucan-protein synthase [UDP-forming]-like protein
Ca16963	Ca7	26142237	26144758	2.03088	2.09993	11.6762	3.14489e-11	5.34457e-08	15.6135	PREDICTED: AP2-like ethylene-responsive transcription factor AIL7 n_1 Tax_Cicer arietinum RepID_UPI00032AAD0E	#N/A	#N/A	Medtr8g468920.1	AP2-like ethylene-responsive transcription factor
Ca17007	Ca7	26550424	26562005	-0.654074	5.19935	-7.58851	9.5121e-08	8.31357e-06	7.89955	PREDICTED: 5-formyltetrahydrofolate cyclo-ligase-like protein COG0212 n_1 Tax_Cicer arietinum RepID_UPI00032A7BA1	ATMG00860.1	DNA/RNA polymerases superfamily protein	Medtr6g045307.1	IPP transferase
Ca17069	Ca7	27809262	27823598	-0.57593	3.33158	-6.1067	2.95044e-06	7.64875e-05	4.58207	PREDICTED: amino acid permease 3-like n_1 Tax_Cicer arietinum RepID_UPI0006414B8B	AT1G31220.1	Formyl transferase	Medtr2g031750.2	transmembrane amino acid transporter family protein
Ca17134	Ca7	29043580	29050757	-0.391727	3.36126	-5.00087	4.47003e-05	0.000501976	1.87165	3-deoxy-manno-octulosonate cytidylyltransferase n_1 Tax_Medicago truncatula RepID_A0A072VK14_MEDTR	AT1G53000.1	Nucleotide-diphospho-sugar transferases superfamily protein	Medtr1g057850.1	3-deoxy-manno-octulosonate cytidylyltransferase
Ca17178	Ca7	29491926	29500011	0.420857	4.39906	5.79706	6.24765e-06	0.000126073	3.73846	PREDICTED: probable beta-1 -3-galactosyltransferase 14 n_1 Tax_Cicer arietinum RepID_UPI00032A9FAB	AT4G02500.1	UDP-xylosyltransferase 2	Medtr4g119880.1	xyloglucan xylosyltransferase
Ca17262	Ca7	31006264	31012445	0.548115	4.82832	4.81008	7.20544e-05	0.000711014	1.30209	PREDICTED: protein STRUBBELIG-RECEPTOR FAMILY 6 n_1 Tax_Cicer arietinum RepID_UPI00032A8E31	AT1G53730.2	STRUBBELIG-receptor family 6	Medtr8g023560.2	strubbelig-receptor family 6 protein
Ca17266	Ca7	31088737	31092661	-0.461152	5.08627	-5.20577	2.68222e-05	0.000345907	2.27989	PREDICTED: ribosome production factor 1 n_1 Tax_Cicer arietinum RepID_UPI00032A948E	AT4G01560.1	Ribosomal RNA processing Brix domain protein	Medtr8g023820.1	ribosome production factor-like protein
Ca17277	Ca7	31235571	31240494	-0.298858	7.68951	-5.39115	1.69359e-05	0.000249716	2.73482	Non-specific serine/threonine protein kinase n_5 Tax_Papilionoideae RepID_A0A072TP12_MEDTR	AT1G01140.2	CBL-interacting protein kinase 9, response to salt stress	Medtr8g024600.1	CBL-interacting kinase
Ca17273	Ca7	31280433	31281507	-1.13554	1.8295	-6.37619	1.54865e-06	4.87377e-05	5.30538	PREDICTED: uncharacterized protein LOC101508409 n_1 Tax_Cicer arietinum RepID_UPI000640E337	AT1G01180.1	S-adenosyl-L-methionine-dependent methyltransferases superfamily protein	Medtr8g024680.1	methyltransferase%2C putative
Ca17280	Ca7	31311322	31313220	-0.928728	3.97483	-4.67239	0.000101773	0.000894607	1.06577	PREDICTED: transcription factor bHLH14 n_1 Tax_Cicer arietinum RepID_UPI00032A792F	AT1G32640.1	Basic helix-loop-helix (bHLH) DNA-binding family protein	Medtr8g024790.1	basic helix loop helix (bHLH) family transcription factor
Ca17281	Ca7	31335358	31338373	1.00555	3.9761	6.8721	4.83655e-07	2.3336e-05	6.30363	PREDICTED: rho GTPase-activating protein 5 n_1 Tax_Cicer arietinum RepID_UPI00032A5833	AT2G46710.1	Rho GTPase activating protein with PAK-box/P21-Rho-binding domain	Medtr8g026680.1	Rac GTPase activating protein
Ca17285	Ca7	31405095	31406984	-0.795223	1.41777	-4.57009	0.000131575	0.00107535	1.14632	No Hits	#N/A	#N/A	#N/A
Ca17299	Ca7	31644338	31648917	-0.480147	4.7359	-5.82518	5.83373e-06	0.00012074	3.80528	Endoplasmic reticulum-type calcium-transporting ATPase n_4 Tax_Papilionoideae RepID_A0A072TP30_MEDTR	AT4G00900.1	ER-type Ca2+-ATPase 2	Medtr8g027160.1	endoplasmic reticulum-type calcium-transporting ATPase
Ca17302	Ca7	31767326	31768597	1.17568	2.70434	6.46253	1.26193e-06	4.26076e-05	5.38201	PREDICTED: transcription factor WER-like n_1 Tax_Cicer arietinum RepID_UPI00032A55DF	AT3G13540.1	myb domain protein 5	Medtr8g027345.1	myb transcription factor
Ca17311	Ca7	31861296	31866737	-0.668958	4.88618	-5.85213	5.46337e-06	0.000115577	3.86212	PREDICTED: auxin response factor 18 isoform X1 n_3 Tax_Cicer arietinum RepID_UPI00032A6B31	AT2G46530.3	auxin response factor 11	Medtr8g027440.1	auxin response factor 2
Ca17337	Ca7	32286258	32292948	0.460538	3.30106	5.15161	3.06924e-05	0.000379876	2.2531	PREDICTED: 39S ribosomal protein L46 - mitochondrial-like n_1 Tax_Cicer arietinum RepID_UPI00032ACB98	AT1G01470.1	Late embryogenesis abundant protein	Medtr8g028480.1	late embryogenesis abundant protein
Ca17342	Ca7	32329724	32345202	-0.450688	2.61609	-5.68102	8.29627e-06	0.000151061	3.59619	PREDICTED: golgin candidate 3-like isoform X1 n_3 Tax_Cicer arietinum RepID_UPI00032A8A27	AT3G13460.1	evolutionarily conserved C-terminal region 2	Medtr8g088390.1	evolutionarily carboxy-terminal region protein
Ca17344	Ca7	32404086	32411088	-0.244777	5.41221	-4.70339	9.41557e-05	0.000852137	1.03441	PREDICTED: uncharacterized protein LOC101507146 n_1 Tax_Cicer arietinum RepID_UPI00032A523D	AT4G01210.1	glycosyl transferase family 1 protein	Medtr8g028395.1	group 1 family glycosyltransferase
Ca17349	Ca7	32576149	32582166	0.878105	3.78207	4.94997	5.0765e-05	0.000550674	1.72998	PREDICTED: common plant regulatory factor 1-like n_1 Tax_Cicer arietinum RepID_UPI00032A6483	#N/A	#N/A	Medtr8g028150.1	bZIP transcription factor family protein
Ca17364	Ca7	32646168	32647757	-0.519711	8.1723	-5.60237	1.00616e-05	0.000171946	3.24676	PREDICTED: uncharacterized protein LOC101514316 n_1 Tax_Cicer arietinum RepID_UPI00032AA4EE	AT2G04039.1	#N/A	Medtr8g028100.1	DUF2996 family protein
[truncated: 304 more rows]
