# Supplementary material for: Comparative transcriptome analysis reveals molecular regulation of salt tolerance in two contrasting chickpea genotypes
Source: Front Plant Sci. 2023 May 30;14:1191457. doi: 10.3389/fpls.2023.1191457 (PMC10289292; doi:10.3389/fpls.2023.1191457)
Supplement: Supplementary file 6 [file Table_6.xlsx]

## Sheet: Treatment-dependent
DEGs with treatment-dependent expression differences
Gene ID	Chr	Start	End	logFC	AveExpr	t	P.Value	adj.P.Val	B	Chickpea Annotation	At Homologue	At Annotation	Mt Homologue	Mt Annotation
Ca06817	Ca1	53296	67872	-0.46117	6.66987	-5.39253	1.68781e-05	0.000101955	2.53715	Methionine S-methyltransferase n_6 Tax_Papilionoideae RepID_G7IL50_MEDTR	AT5G49810.1	methionine S-methyltransferase	Medtr2g005110.1	methionine S-methyltransferase
Ca06827	Ca1	151872	154348	1.09392	5.41833	7.20297	2.26334e-07	3.77512e-06	6.86907	Transmembrane protein - putative n_1 Tax_Medicago truncatula RepID_G7IL59_MEDTR	AT1G57680.2	FUNCTIONS IN: molecular_function unknown;	Medtr2g005260.1	transmembrane protein%2C putative
Ca06843	Ca1	205105	207844	0.43921	3.17789	5.02479	4.21077e-05	0.000214966	1.75843	RAB GTPase-like protein B1C n_3 Tax_Papilionoideae RepID_Q1SL04_MEDTR	AT4G17530.1	RAB GTPase	Medtr7g081700.1	RAB GTPase-like protein B1C
Ca06847	Ca1	209308	210108	-1.10594	3.54165	-5.3563	1.84616e-05	0.000110043	2.53564	PREDICTED: ras-related protein RABA2a n_1 Tax_Cicer arietinum RepID_UPI00032A8A3A	AT1G09630.1		Medtr2g005510.1	RAB GTPase-like protein A1D
Ca06839	Ca1	214400	217160	1.15526	7.48568	7.27796	1.90922e-07	3.33941e-06	7.03802	PREDICTED: elongation factor 1-gamma n_1 Tax_Cicer arietinum RepID_UPI00032AA277	AT1G09640.1	Translation elongation factor EF1B,	Medtr3g058940.1	translation elongation factor EF1B%2C gamma chain
Ca06865	Ca1	298091	301830	0.926317	3.13634	6.88363	4.7091e-07	6.39533e-06	6.26029	PREDICTED: tRNA pseudouridine synthase-like 1 isoform X1 n_2 Tax_Cicer arietinum RepID_UPI00032AD21D	AT1G09800.1	Pseudouridine synthase family protein	Medtr2g005830.1	tRNA pseudouridine synthase A
Ca06864	Ca1	332318	338438	1.8558	3.78388	7.96958	4.11691e-08	1.18292e-06	8.6621	PREDICTED: ribosome biogenesis protein BOP1 homolog n_1 Tax_Cicer arietinum RepID_UPI00032A7585	AT2G40360.1	Transducin/WD40 repeat-like superfamily	Medtr2g006020.1	transducin/WD40 repeat protein
Ca06860	Ca1	382493	382900	0.717869	5.20635	4.90561	5.67227e-05	0.000276034	1.32179	60S ribosomal protein L27 n_16 Tax_Papilionoideae RepID_RL27_PEA	AT4G15000.1	Ribosomal L27e protein family	Medtr2g006170.1	60S ribosomal protein L27-1
Ca06875	Ca1	395857	398531	1.06988	3.84049	5.70924	7.74248e-06	5.48287e-05	3.38984	PREDICTED: multiple organellar RNA editing factor 1 - mitochondrial-like isoform X1 n_2 Tax_Cicer arietinum RepID_UPI00032AA372	AT4G20020.2	unknown protein; BEST Arabidopsis thaliana	Medtr2g006210.1	plastid developmental protein DAG%2C putative
Ca06879	Ca1	407433	413820	0.897327	6.28573	8.62312	1.02421e-08	4.6902e-07	9.99488	Uncharacterized protein n_11 Tax_Papilionoideae RepID_A0A0S3S1S1_PHAAN	AT1G10950.1	transmembrane nine 1	Medtr8g088730.1	endomembrane protein 70 family protein
Ca06872	Ca1	415463	418579	0.937866	3.30112	5.00314	4.44472e-05	0.000224467	1.69388	Uncharacterized protein n_8 Tax_Papilionoideae RepID_I1LTF6_SOYBN	AT5G08590.1	SNF1-related	Medtr2g006330.2	sucrose non-fermenting-like kinase 2 family protein
Ca06904	Ca1	493586	501429	1.063	4.69308	7.7786	6.24881e-08	1.53906e-06	8.17866	Importin beta-4 n_2 Tax_Papilionoideae RepID_G7IPF0_MEDTR	AT4G27640.1	ARM repeat superfamily protein	Medtr2g006750.1	importin beta-4
Ca06909	Ca1	502705	504605	-1.08223	0.579351	-4.65	0.000107657	0.000466152	1.29606	F-box/RNI/FBD-like domain protein n_1 Tax_Medicago truncatula RepID_G7KH21_MEDTR			Medtr5g083890.1	F-box/RNI/FBD-like domain protein
Ca06900	Ca1	566416	572368	0.576486	4.21094	4.91395	5.55506e-05	0.000271279	1.37358	PREDICTED: cell division control protein 48 homolog C-like n_1 Tax_Cicer arietinum RepID_UPI00032A884B	AT3G01610.1	cell division cycle	Medtr2g007010.1	cell division control-like protein
Ca06907	Ca1	576040	581356	0.519306	4.46391	5.29827	2.13171e-05	0.000123831	2.31723	PREDICTED: pentatricopeptide repeat-containing protein At1g10910 - chloroplastic n_1 Tax_Cicer arietinum RepID_UPI00032AA957	AT1G10910.1	Pentatricopeptide repeat (PPR) superfamily	Medtr2g007030.1	PPR containing plant-like protein
Ca06896	Ca1	594188	599786	-0.704911	4.98463	-8.15051	2.78507e-08	9.34201e-07	8.9829	Ribosomal protein S7 n_3 Tax_Medicago truncatula RepID_A2Q3T8_MEDTR			#N/A	#N/A
Ca06895	Ca1	619801	622288	-0.636779	6.47812	-5.61175	9.83251e-06	6.61629e-05	3.07859	PREDICTED: probable plastid-lipid-associated protein 4 - chloroplastic isoform X1 n_1 Tax_Cicer arietinum RepID_UPI00032A8822	AT3G26070.1	Plastid-lipid associated protein PAP	Medtr2g007300.1	plastid lipid-associated protein
Ca06892	Ca1	642167	647486	-0.611521	2.9003	-4.9838	4.66477e-05	0.00023362	1.69849	PREDICTED: uncharacterized protein LOC101493343 n_1 Tax_Cicer arietinum RepID_UPI00032A6F34	AT1G10790.1	BEST Arabidopsis thaliana protein match	Medtr2g438510.1	transmembrane protein%2C putative
Ca06887	Ca1	650430	652850	-0.875585	4.94361	-6.46231	1.26259e-06	1.33181e-05	5.13734	PREDICTED: probable plastid-lipid-associated protein 4 - chloroplastic n_1 Tax_Cicer arietinum RepID_UPI00032A78DF	AT3G26070.1	Plastid-lipid associated protein PAP	Medtr2g007640.3	plastid lipid-associated protein
Ca06893	Ca1	679217	681275	2.06177	3.6672	7.08381	2.97038e-07	4.53136e-06	6.6893	PREDICTED: mRNA turnover protein 4 homolog n_1 Tax_Cicer arietinum RepID_UPI00032ACC76	AT1G25260.1	Ribosomal protein L10 family protein	Medtr2g007780.1	ribosomal protein L10 family protein
Ca06915	Ca1	705766	709485	0.868198	4.76771	7.6079	9.111e-08	2.02219e-06	7.79358	PREDICTED: pinin n_1 Tax_Cicer arietinum RepID_UPI00032A565A	AT1G15200.2	protein-protein interaction regulator	Medtr2g007800.1	protein interaction regulator family protein
Ca06938	Ca1	822292	824960	-0.545368	4.98041	-5.38721	1.71018e-05	0.000102941	2.51922	Cytochrome b-c1 complex subunit 6 n_12 Tax_fabids RepID_C6SZG8_SOYBN			#N/A	#N/A
Ca06943	Ca1	841087	845105	0.567495	4.12022	5.33759	1.9337e-05	0.00011426	2.43819	Serine decarboxylase n_3 Tax_Papilionoideae RepID_G7IL92_MEDTR	AT1G43710.1	Pyridoxal phosphate (PLP)-dependent	Medtr2g008120.1	serine decarboxylase
Ca06948	Ca1	857113	858197	0.783557	6.46681	6.80368	5.66876e-07	7.2738e-06	5.94657	Uncharacterized protein n_3 Tax_Soja RepID_K7M9P7_SOYBN	AT4G14320.1	Zinc-binding ribosomal protein family	Medtr4g094308.1	60S ribosomal protein L36a
Ca06924	Ca1	939333	950691	1.69632	2.1098	4.77489	7.86988e-05	0.000360279	1.36533	PREDICTED: high affinity sulfate transporter 2-like n_2 Tax_Cicer arietinum RepID_UPI00032A6DC0	AT1G22150.1	sulfate transporter 1;3	Medtr2g008470.1	high affinity sulfate transporter type 1
Ca06927	Ca1	962238	968062	-1.17111	7.59038	-9.22835	2.96944e-09	2.15249e-07	11.2393	PREDICTED: probable protein phosphatase 2C 62 n_1 Tax_Cicer arietinum RepID_UPI00032AB6A1			Medtr2g008590.2	SpoIIE-like protein phosphatase domain protein
Ca06920	Ca1	969516	970851	-0.528324	11.4961	-6.30577	1.83131e-06	1.78129e-05	4.61658	Light-harvesting complex I chlorophyll A/B-binding protein n_12 Tax_Papilionoideae RepID_G7INT9_MEDTR	AT1G15820.1	light harvesting complex	Medtr2g008610.1	light-harvesting complex I chlorophyll A/B-binding protein
Ca06931	Ca1	970961	973786	1.50379	1.25005	6.22714	2.20978e-06	2.06467e-05	4.96682	PREDICTED: uncharacterized protein LOC101509972 n_1 Tax_Cicer arietinum RepID_UPI00032ACEAC	AT5G10160.1	Thioesterase superfamily protein	Medtr2g008620.1	beta-hydroxyacyl-ACP dehydratase
Ca06932	Ca1	980577	986528	-0.860258	7.72957	-7.6438	8.41371e-08	1.89805e-06	7.86116	PREDICTED: uncharacterized protein LOC101510618 isoform X1 n_1 Tax_Cicer arietinum RepID_UPI00032AA6B3	AT5G64170.2	dentin sialophosphoprotein-related	Medtr2g008750.2	dentin sialophosphoprotein-like protein%2C putative
Ca06970	Ca1	996242	1001292	-0.398133	4.56808	-5.35824	1.8373e-05	0.000109557	2.45715	PREDICTED: CD2 antigen cytoplasmic tail-binding protein 2 n_1 Tax_Cicer arietinum RepID_UPI00032AC3C1			Medtr2g008810.1	CD2 antigen cytoplasmic tail-binding-like protein
Ca06969	Ca1	1036154	1039254	1.12722	4.7081	8.91533	5.59998e-09	3.24887e-07	10.6084	PREDICTED: ribosome biogenesis regulatory protein homolog n_1 Tax_Cicer arietinum RepID_UPI00032A6AE8	AT2G37990.1	ribosome biogenesis regulatory protein	Medtr2g008870.1	ribosome biogenesis regulatory family protein
Ca06968	Ca1	1040607	1043018	-1.49845	0.553565	-5.58959	1.03827e-05	6.87299e-05	3.51253	PREDICTED: monoacylglycerol lipase ABHD6 n_1 Tax_Cicer arietinum RepID_UPI00032A7F04	AT5G09430.1	alpha/beta-Hydrolases superfamily protein	Medtr2g008880.1	alpha/beta-hydrolase superfamily protein
Ca06976	Ca1	1049441	1059753	-1.38263	5.7996	-5.77019	6.671e-06	4.922e-05	3.46427	PREDICTED: metacaspase-3-like isoform X1 n_2 Tax_Cicer arietinum RepID_UPI00032ABAB4	AT1G02170.1	metacaspase	Medtr2g008980.1	ICE-like protease (caspase) p20 domain protein
Ca06974	Ca1	1078755	1084004	0.480026	7.68597	6.52731	1.08285e-06	1.1864e-05	5.2869	PREDICTED: phospho-2-dehydro-3-deoxyheptonate aldolase 2 - chloroplastic-like n_1 Tax_Cicer arietinum RepID_UPI00032A71CC	AT4G33510.2	3-deoxy-d-arabino-heptulosonate	Medtr2g009080.1	phospho-2-dehydro-3-deoxyheptonate aldolase
Ca06962	Ca1	1110972	1114236	-0.629734	8.3846	-8.21879	2.40588e-08	8.39655e-07	9.11615	2-oxoglutarate/malate translocator n_2 Tax_Papilionoideae RepID_G7IPL2_MEDTR	AT5G64290.1	dicarboxylate transport	Medtr2g009220.1	2-oxoglutarate/malate translocator
Ca06952	Ca1	1122537	1122863	3.80033	3.49573	7.9584	4.2182e-08	1.19036e-06	8.68734	PREDICTED: classical arabinogalactan protein 1-like n_1 Tax_Cicer arietinum RepID_UPI00032A9934			#N/A	#N/A
Ca07379	Ca1	1285198	1286484	0.595042	4.4497	6.07709	3.16852e-06	2.74886e-05	4.22819	PREDICTED: 40S ribosomal protein S5-like n_1 Tax_Cicer arietinum RepID_UPI00032AA9CC	AT2G37270.2	ribosomal protein 5B	Medtr7g107380.1	40S ribosomal protein S5-2
Ca07359	Ca1	1323894	1325564	1.21756	3.51339	5.88269	5.07207e-06	3.98445e-05	3.84362	PREDICTED: U3 small nucleolar RNA-associated protein 18 homolog n_1 Tax_Cicer arietinum RepID_UPI00032A6E62	AT5G14050.1	Transducin/WD40 repeat-like superfamily	Medtr2g009800.2	U3 small nucleolar RNA-associated-like protein
Ca07340	Ca1	1392021	1395645	1.01701	6.45939	7.39241	1.47469e-07	2.84239e-06	7.30369	Heat shock 70 kDa protein - mitochondrial n_25 Tax_rosids RepID_HSP7M_PHAVU	AT5G09590.1	mitochondrial HSO70	Medtr4g092920.1	heat shock 70 kDa protein
Ca07336	Ca1	1397623	1404381	1.25562	4.31326	6.57965	9.57241e-07	1.06939e-05	5.44387	PREDICTED: DNA polymerase V n_1 Tax_Cicer arietinum RepID_UPI00032A7018	AT5G64420.1	DNA polymerase V family	Medtr2g010110.1	DNA polymerase V-like protein%2C putative
Ca07363	Ca1	1404696	1407361	0.409237	5.1336	5.06942	3.76691e-05	0.000195969	1.72982	PREDICTED: transcription factor GTE7-like n_1 Tax_Cicer arietinum RepID_UPI00032AC638	AT5G65630.1	global transcription factor group	Medtr4g092900.4	global transcription factor group protein
Ca07354	Ca1	1513212	1515312	-1.81539	3.58108	-10.5286	2.42924e-10	4.35826e-08	13.8026	PREDICTED: uncharacterized protein LOC101507431 n_1 Tax_Cicer arietinum RepID_UPI00032A717E	AT5G64510.1	unknown protein; FUNCTIONS IN:	Medtr2g010460.1	nicotiana tabacum ORF protein
Ca07344	Ca1	1525847	1530170	0.629817	4.75409	5.07598	3.70578e-05	0.000193844	1.75267	PREDICTED: proline iminopeptidase n_1 Tax_Cicer arietinum RepID_UPI00032AA6A8	AT2G14260.2	proline iminopeptidase	Medtr2g010480.1	proline iminopeptidase
Ca07360	Ca1	1661998	1662969	-0.736542	5.08678	-5.32141	2.01282e-05	0.000118031	2.3555	PREDICTED: uncharacterized protein At5g39570 n_1 Tax_Cicer arietinum RepID_UPI00032ABCDF	AT1G11440.1	BEST Arabidopsis thaliana protein match	Medtr2g010980.1	hypothetical protein
Ca07335	Ca1	1677535	1680115	-2.00136	2.38787	-10.4536	2.791e-10	4.69103e-08	13.6895	PREDICTED: transcription factor bHLH112-like isoform X1 n_2 Tax_Cicer arietinum RepID_UPI00032AAE63	AT1G61660.3	basic helix-loop-helix (bHLH) DNA-binding	Medtr2g011070.1	BHLH transcription factor-like protein
Ca06984	Ca1	1750428	1752891	-1.39804	2.11521	-7.96383	4.16866e-08	1.19036e-06	8.77779	PREDICTED: protein PLANT CADMIUM RESISTANCE 8-like n_1 Tax_Cicer arietinum RepID_UPI000640F4EA			Medtr2g011490.2	PLAC8 family protein
Ca06986	Ca1	1752956	1753238	-1.35029	0.741356	-6.94233	4.11179e-07	5.80623e-06	6.57088	No Hits			#N/A	#N/A
Ca07001	Ca1	1792305	1796544	0.640579	5.29497	4.90507	5.67997e-05	0.000276321	1.31989	PREDICTED: uncharacterized aarF domain-containing protein kinase 2 n_1 Tax_Cicer arietinum RepID_UPI00032A89C0	AT1G11390.1	Protein kinase superfamily protein	Medtr2g011640.1	Serine/Threonine-kinase abkC-like protein%2C putative
Ca07004	Ca1	1817615	1822820	-0.823858	5.05176	-6.83428	5.27976e-07	6.91979e-06	6.01533	PREDICTED: putative PAP-specific phosphatase - mitochondrial isoform X1 n_2 Tax_Cicer arietinum RepID_UPI00032A7073	AT4G05090.1	Inositol monophosphatase family protein	Medtr2g011680.1	inositol monophosphatase family protein
Ca07014	Ca1	1914436	1924171	0.562694	4.50951	7.48201	1.20619e-07	2.45983e-06	7.51553	AP2/B3 transcription factor family protein n_2 Tax_Papilionoideae RepID_G7ILC5_MEDTR	AT4G32010.1	HSI2-like 1	Medtr2g011940.1	AP2/B3 transcription factor family protein
Ca07017	Ca1	1963170	1963610	1.20648	5.67681	7.7749	6.29982e-08	1.54664e-06	8.16056	Uncharacterized protein n_8 Tax_Phaseoleae RepID_I1J9E4_SOYBN	AT5G67510.1	Translation protein SH3-like family	Medtr2g012450.1	60S ribosomal protein L26-1
Ca07026	Ca1	2076719	2082790	2.02765	2.74471	7.01317	3.49289e-07	5.15176e-06	6.61807	PREDICTED: protein STRUBBELIG-RECEPTOR FAMILY 3-like n_1 Tax_Cicer arietinum RepID_UPI00032A555B	AT4G03390.1	STRUBBELIG-receptor family 3	Medtr2g012670.1	strubbelig receptor family 3 protein
Ca07055	Ca1	2185737	2193039	0.433146	4.08421	5.15185	3.06734e-05	0.000166306	1.97762	PREDICTED: allantoinase isoform X1 n_2 Tax_Cicer arietinum RepID_UPI00032A830C	AT4G04955.1	allantoinase	Medtr2g013060.1	allantoinase
Ca07049	Ca1	2215491	2217349	-1.29595	2.09975	-7.80325	5.91955e-08	1.48914e-06	8.43295	PREDICTED: CBS domain-containing protein CBSX5-like n_1 Tax_Cicer arietinum RepID_UPI00032AAB26	AT4G27460.1	Cystathionine beta-synthase (CBS) family	Medtr2g013110.1	CBS domain CBSX5-like protein
Ca07053	Ca1	2254542	2261070	0.614789	4.27007	6.03032	3.54703e-06	3.00232e-05	4.12274	PREDICTED: proteinaceous RNase P 2 n_1 Tax_Cicer arietinum RepID_UPI00032AD146	AT2G16650.1	proteinaceous RNase P 2	Medtr2g101360.1	proteinaceous RNase P
Ca07062	Ca1	2299787	2300629	-3.036	1.64504	-7.19274	2.31663e-07	3.83887e-06	7.14042	PREDICTED: dof zinc finger protein DOF4.7-like n_1 Tax_Cicer arietinum RepID_UPI00032AA63E	AT1G28310.2	Dof-type zinc finger DNA-binding family	Medtr2g013370.1	Dof domain zinc finger protein
Ca07067	Ca1	2319694	2320410	-0.627523	3.4858	-6.10045	2.99517e-06	2.63131e-05	4.35457	PREDICTED: enoyl-CoA delta isomerase 2 - peroxisomal-like n_1 Tax_Cicer arietinum RepID_UPI00032A5FCD	AT4G14440.1	3-hydroxyacyl-CoA	Medtr2g013460.1	enoyl-CoA hydratase/isomerase family protein
Ca07073	Ca1	2331047	2331736	1.40789	2.78265	6.84108	5.1972e-07	6.8586e-06	6.2426	PREDICTED: E3 ubiquitin-protein ligase RMA1H1-like n_1 Tax_Cicer arietinum RepID_UPI00032A95BD	AT4G27470.1	RING membrane-anchor 3	Medtr2g013550.2	E3 ubiquitin-protein ligase RMA1H1-like protein
Ca07070	Ca1	2354112	2360111	-0.75123	5.70295	-4.93149	5.3166e-05	0.000260883	1.38667	PREDICTED: probable ubiquitin-conjugating enzyme E2 24 n_1 Tax_Cicer arietinum RepID_UPI00032A5BAD	AT2G33770.1	phosphate 2	Medtr2g013650.1	ubiquitin-conjugating enzyme E2
Ca07081	Ca1	2409991	2413817	-1.02227	3.85703	-6.83731	5.24279e-07	6.89497e-06	6.07746	PREDICTED: serine/threonine-protein kinase HT1-like n_1 Tax_Cicer arietinum RepID_UPI00032A7078	AT5G58950.1	Protein kinase superfamily protein	Medtr2g013900.1	tyrosine kinase family protein
Ca07080	Ca1	2431116	2431742	-1.46884	1.93359	-6.39282	1.48868e-06	1.51694e-05	5.2719	PREDICTED: VQ motif-containing protein 4 n_1 Tax_Cicer arietinum RepID_UPI00032A95A0	AT1G28280.2	VQ motif-containing protein	Medtr2g013950.1	VQ motif protein
Ca07076	Ca1	2455698	2460409	0.920336	3.81934	7.17922	2.38902e-07	3.90305e-06	6.87425	PREDICTED: protein SMG7L isoform X1 n_3 Tax_Cicer arietinum RepID_UPI00032A5148	AT1G28260.2	Telomerase activating protein Est1	Medtr2g013980.3	telomerase activating protein Est1
Ca07079	Ca1	2483219	2485583	0.943425	6.84973	7.80118	5.94645e-08	1.491e-06	8.21975	40S ribosomal protein S6 n_24 Tax_Mesangiospermae RepID_K4CI93_SOLLC	AT4G31700.2	ribosomal protein S6	Medtr2g014030.1	40S ribosomal protein S6-2
Ca07129	Ca1	2730948	2733092	-0.741775	1.98531	-5.24311	2.44449e-05	0.000138693	2.50559	PREDICTED: tRNA (adenine(58)-N(1))-methyltransferase catalytic subunit TRMT61A-like n_1 Tax_Cicer arietinum RepID_UPI00032A50B0	AT5G14600.1	S-adenosyl-L-methionine-dependent methyltransferases	Medtr6g047800.2	tRNA methyltransferase complex GCD14 subunit
Ca07154	Ca1	2987749	2991699	-1.0308	1.95172	-6.73562	6.64245e-07	8.10177e-06	6.06238	PREDICTED: GDSL esterase/lipase At5g45920 n_1 Tax_Cicer arietinum RepID_UPI00032A719D	AT5G45920.1	SGNH hydrolase-type esterase superfamily	Medtr2g015500.1	GDSL esterase/lipase plant-like protein
Ca07155	Ca1	3028559	3030190	0.995284	5.1931	5.9686	4.11795e-06	3.3826e-05	3.95129	40S ribosomal protein S27 n_14 Tax_Spermatophyta RepID_A0A0D2MUG4_GOSRA	AT3G61110.1	ribosomal protein S27	Medtr2g015680.1	40S ribosomal protein S27-1
Ca07169	Ca1	3084427	3090506	-0.684883	4.27651	-6.04672	3.40933e-06	2.91154e-05	4.15873	Maternal effect embryo arrest 18 protein n_2 Tax_Papilionoideae RepID_G7ILI7_MEDTR	AT2G34090.1	maternal effect embryo arrest	Medtr2g015860.1	maternal effect embryo arrest 18 protein
Ca07171	Ca1	3181920	3182947	-2.03406	1.53572	-6.21323	2.28456e-06	2.12029e-05	4.91783	PREDICTED: probable phosphatidylinositol 4-phosphate 5-kinase MSS4 n_1 Tax_Cicer arietinum RepID_UPI00032A59B3	AT1G29195.1	unknown protein; FUNCTIONS IN: molecular_function	Medtr2g016150.1	plant/F28N24-12 protein
Ca07185	Ca1	3311480	3313613	-1.40534	4.61288	-5.34086	1.91811e-05	0.000113623	2.42295	PREDICTED: uncharacterized protein LOC101509109 n_1 Tax_Cicer arietinum RepID_UPI00032AD0B8			Medtr2g016520.1	RING/FYVE/PHD zinc finger protein
Ca07198	Ca1	3340279	3341580	1.76643	2.99442	4.90817	5.63603e-05	0.00027462	1.54478	PREDICTED: systemin receptor SR160 n_1 Tax_Cicer arietinum RepID_UPI00032A4FD2	AT4G18760.1	receptor like protein	Medtr2g016620.1	LRR receptor-like kinase
Ca07194	Ca1	3366239	3371426	-0.571226	5.10128	-4.91979	5.47454e-05	0.00026786	1.35646	WD-repeat protein - putative n_44 Tax_eudicotyledons RepID_B9SCC1_RICCO	AT3G18140.1	Transducin/WD40 repeat-like superfamily	Medtr2g016690.1	transducin/WD-like repeat-protein
Ca07228	Ca1	3582987	3590980	-1.65971	1.34473	-5.56183	1.1116e-05	7.23797e-05	3.38703	AGAMOUSa n_2 Tax_Papilionoideae RepID_T2DRL2_MEDTR	AT3G58780.2	K-box region and MADS-box	Medtr2g017865.1	MADS-box transcription factor
Ca07229	Ca1	3633027	3634760	-1.15982	1.77309	-7.28713	1.87002e-07	3.31149e-06	7.32658	PREDICTED: uncharacterized protein LOC101495581 n_1 Tax_Cicer arietinum RepID_UPI00032A4D3D	AT5G45660.1	unknown protein; FUNCTIONS IN: molecular_function	Medtr2g018105.1	transmembrane protein%2C putative
Ca07231	Ca1	3682339	3685981	0.768789	6.3449	5.31103	2.06532e-05	0.000120707	2.3341	PREDICTED: serine hydroxymethyltransferase 3 - chloroplastic n_1 Tax_Cicer arietinum RepID_UPI00032AB36E	AT4G32520.2	serine hydroxymethyltransferase	Medtr2g018290.1	serine transhydroxymethyltransferase
Ca07241	Ca1	3689492	3693064	-0.541332	2.91962	-4.77253	7.91651e-05	0.000361982	1.1695	Uncharacterized protein n_13 Tax_rosids RepID_C6SVK3_SOYBN	AT2G25950.1	Protein of unknown function (DUF1000)	Medtr2g018310.1	thioredoxin family Trp26 protein
Ca07247	Ca1	3838559	3843300	0.827459	6.6376	4.9048	5.68379e-05	0.00027633	1.32373	PREDICTED: CSC1-like protein ERD4 n_1 Tax_Cicer arietinum RepID_UPI00032AC61C	AT1G30360.1	Early-responsive to dehydration	Medtr2g018780.1	early-responsive to dehydration stress protein (ERD4)
Ca07263	Ca1	3908973	3925137	1.37099	7.64443	5.70648	7.79499e-06	5.51199e-05	3.30202	Uncharacterized protein n_7 Tax_Phaseoleae RepID_A0A0S3S3A4_PHAAN	AT2G34660.2	multidrug resistance-associated	Medtr2g019020.4	multidrug resistance protein ABC transporter family protein
Ca07259	Ca1	3936260	3937645	0.950644	4.89002	8.3843	1.69168e-08	6.65147e-07	9.48954	PREDICTED: transcription factor TCP2 n_1 Tax_Cicer arietinum RepID_UPI00032A5C4F	AT1G30210.2	TEOSINTE BRANCHED 1, cycloidea,	Medtr7g015010.1	TCP family transcription factor
Ca07262	Ca1	3955163	3956371	-0.924109	4.38651	-9.81585	9.33759e-10	9.91795e-08	12.4166	F-box plant-like protein n_2 Tax_Papilionoideae RepID_G7IP60_MEDTR	AT5G46170.1	F-box family protein	Medtr2g019080.2	F-box plant-like protein
Ca07299	Ca1	4115514	4408222	0.643154	7.71777	6.95669	3.97783e-07	5.68606e-06	6.29591	PREDICTED: DNA-directed RNA polymerase I subunit RPA2-like n_2 Tax_Cicer arietinum RepID_UPI00032A6B80	AT1G30010.1	Intron maturase, type II family protein	Medtr2g019640.1	cytochrome P450 family monooxygenase
Ca07273	Ca1	4119200	4121737	-0.787166	3.66418	-5.51134	1.25874e-05	8.01848e-05	2.89824	PREDICTED: uncharacterized protein LOC101514291 n_1 Tax_Cicer arietinum RepID_UPI00032A9FB8	AT5G46220.1	Protein of unknown function (DUF616)	Medtr2g019450.1	transmembrane protein
Ca07277	Ca1	4224911	4227096	0.887138	7.19234	5.81989	5.90941e-06	4.48145e-05	3.5853	60S ribosomal protein L18a n_8 Tax_Soja RepID_I1JJ27_SOYBN	AT2G34480.1	Ribosomal protein L18ae/LX family protein	Medtr5g091120.1	60S ribosomal protein L18a-3
Ca07284	Ca1	4297699	4298007	-2.91707	0.103234	-5.07506	3.7143e-05	0.000194114	2.30338	Uncharacterized protein n_9 Tax_Papilionoideae RepID_I1M1D2_SOYBN	AT3G21460.1	Glutaredoxin family protein	Medtr2g019950.1	monothiol glutaredoxin-S2 protein
Ca07286	Ca1	4347319	4354825	0.909838	6.75998	5.90275	4.83083e-06	3.83234e-05	3.78974	Uncharacterized protein n_2 Tax_Oryza RepID_A0A0E0F5Q9_9ORYZ	AT2G37270.2	ribosomal protein 5B	Medtr7g107380.1	40S ribosomal protein S5-2
Ca07294	Ca1	4485710	4487694	0.910872	5.12575	5.86334	5.31634e-06	4.12076e-05	3.69185	PREDICTED: acyl carrier protein 1 - chloroplastic-like n_1 Tax_Cicer arietinum RepID_UPI00032A6F4A			Medtr2g020360.3	acyl carrier protein
Ca07308	Ca1	4544206	4568349	-1.04815	6.9679	-8.45484	1.45748e-08	5.94456e-07	9.63876	PREDICTED: probable 1-deoxy-D-xylulose-5-phosphate synthase - chloroplastic n_1 Tax_Cicer arietinum RepID_UPI000640C227	AT4G15560.1	Deoxyxylulose-5-phosphate	Medtr4g118640.1	1-deoxy-D-xylulose-5-phosphate synthase
Ca07304	Ca1	4577001	4583210	-0.354903	5.24572	-4.78112	7.74791e-05	0.000355762	1.00982	PREDICTED: squamosa promoter-binding-like protein 7 n_1 Tax_Cicer arietinum RepID_UPI0006415C0F	AT5G18830.2	squamosa promoter binding protein-like	Medtr2g020620.1	squamosa promoter-binding-like protein
Ca07324	Ca1	4678914	4679715	-0.995453	3.21963	-7.39411	1.46907e-07	2.84239e-06	7.41135	PREDICTED: uncharacterized protein LOC101505806 n_1 Tax_Cicer arietinum RepID_UPI00032A7FD4			Medtr2g020830.1	plant/F10N7-170 protein%2C putative
Ca07309	Ca1	4679360	4679935	-0.89307	4.37623	-6.63368	8.43153e-07	9.67186e-06	5.56177	PREDICTED: uncharacterized protein LOC101505806 n_1 Tax_Cicer arietinum RepID_UPI00032A7FD4	AT3G21570.1	unknown protein; Has 43 Blast hits	Medtr2g020830.1	plant/F10N7-170 protein%2C putative
Ca07328	Ca1	4774042	4778765	-0.737223	3.83997	-5.75353	6.94796e-06	5.07009e-05	3.47596	Structural constituent of ribosome protein - putative n_4 Tax_Medicago truncatula RepID_B7FJS9_MEDTR	AT5G18940.2	Mo25 family protein	Medtr2g021040.2	structural constituent of ribosome protein%2C putative
Ca07388	Ca1	4835153	4838894	0.496752	4.26401	5.50291	1.28515e-05	8.15619e-05	2.8313	PREDICTED: protein ABCI12 - chloroplastic isoform X1 n_3 Tax_Cicer arietinum RepID_UPI00032A841C	AT3G21580.1	cobalt ion transmembrane transporters	Medtr2g021220.1	cobalt ion transmembrane transporters protein
Ca07384	Ca1	4854634	4864090	2.16301	0.621176	6.89859	4.54895e-07	6.24802e-06	6.44792	PREDICTED: uncharacterized protein LOC101512873 isoform X1 n_2 Tax_Cicer arietinum RepID_UPI000640DCF8	AT4G02930.1	GTP binding Elongation factor Tu family	Medtr2g021300.1	GTP-binding elongation factor Tu family protein
Ca07387	Ca1	4864670	4867580	-1.16459	4.86238	-4.81455	7.12512e-05	0.000332317	1.09763	Armadillo/beta-catenin-like repeat protein n_2 Tax_Papilionoideae RepID_G7IKE1_MEDTR	AT5G18980.1	ARM repeat superfamily protein	Medtr2g021310.1	armadillo/beta-catenin-like repeat protein
Ca07390	Ca1	4875438	4881635	-1.26404	6.91272	-7.97021	4.1113e-08	1.18292e-06	8.59258	Mitogen-activated protein kinase n_12 Tax_Papilionoideae RepID_A0A0B2RMI2_GLYSO	AT2G42880.1	MAP kinase 20	Medtr2g021330.1	MAP kinase-like protein
Ca07402	Ca1	4974970	4979270	1.28072	5.94419	6.22605	2.21554e-06	2.06752e-05	4.57238	PREDICTED: polyadenylate-binding protein RBP45 isoform X1 n_2 Tax_Cicer arietinum RepID_UPI00032A7108	AT4G27000.1	RNA-binding (RRM/RBD/RNP motifs)	Medtr2g022950.2	polyadenylate-binding protein RBP47B
Ca07399	Ca1	4985953	4989139	-0.63464	5.39838	-7.00451	3.56314e-07	5.24525e-06	6.40996	Uncharacterized protein n_33 Tax_Pentapetalae RepID_K4B9Q9_SOLLC	AT4G04860.1	DERLIN-2.2	Medtr2g022890.1	derlin-2 protein
Ca07415	Ca1	4991064	4992248	0.944603	2.95595	4.86082	6.3453e-05	0.000302152	1.39372	PREDICTED: pentatricopeptide repeat-containing protein At1g61870 - mitochondrial n_1 Tax_Cicer arietinum RepID_UPI00032A6F5E	AT1G61870.1	pentatricopeptide repeat 336	Medtr2g022860.1	membrane-associated salt-inducible protein
Ca07428	Ca1	5022481	5027172	-0.661143	4.43473	-7.54644	1.04459e-07	2.22821e-06	7.66087	P-loop nucleoside triphosphate hydrolase superfamily protein n_1 Tax_Medicago truncatula RepID_G7J6P4_MEDTR	AT4G12790.5	P-loop containing nucleoside triphosphate	Medtr3g080040.1	P-loop nucleoside triphosphate hydrolase superfamily protein
Ca07424	Ca1	5035619	5037587	4.63738	4.28124	6.38408	1.51991e-06	1.53954e-05	5.04146	Glucose-6-phosphate/phosphate translocator-like protein n_2 Tax_Papilionoideae RepID_A0A072VF80_MEDTR	AT1G61800.1	glucose-6-phosphate/phosphate	Medtr2g022700.1	glucose-6-phosphate/phosphate translocator-like protein
Ca07408	Ca1	5097292	5101366	0.538111	3.82386	6.6455	8.20096e-07	9.46669e-06	5.62534	PREDICTED: ATP-dependent (S)-NAD(P)H-hydrate dehydratase isoform X1 n_2 Tax_Cicer arietinum RepID_UPI00032AC6C7	AT5G19150.2	pfkB-like carbohydrate kinase family	Medtr2g022530.2	ATP-dependent (S)-NAD(P)H-hydrate dehydratase
Ca07407	Ca1	5119455	5126303	1.16243	4.74807	5.51752	1.23971e-05	7.92912e-05	2.85481	Uncharacterized protein n_8 Tax_Papilionoideae RepID_I1M137_SOYBN	AT3G23940.1	dehydratase family	Medtr2g089340.1	dihydroxyacid dehydratase
Ca07466	Ca1	5470001	5477001	0.657502	8.12893	6.04091	3.45748e-06	2.9428e-05	4.1108	PREDICTED: putative lactoylglutathione lyase n_1 Tax_Cicer arietinum RepID_UPI00032AC84C	AT1G11840.6	glyoxalase I homolog	Medtr2g023500.4	lactoylglutathione lyase-like protein
Ca07488	Ca1	5623972	5625533	0.816721	4.93661	5.20229	2.70553e-05	0.000150258	2.10829	PREDICTED: uncharacterized protein LOC101511259 n_1 Tax_Cicer arietinum RepID_UPI00032ABC7A			Medtr2g024300.1	chaperonin-like RbcX protein
Ca07487	Ca1	5641459	5646351	-1.46688	1.31772	-6.15447	2.63035e-06	2.36238e-05	4.78777	PREDICTED: protein STRUBBELIG-RECEPTOR FAMILY 8 n_1 Tax_Cicer arietinum RepID_UPI00032A7CEE	AT4G22130.2	STRUBBELIG-receptor family 8	Medtr2g024330.1	strubbelig-receptor family protein
Ca07501	Ca1	5707853	5708860	-0.767715	4.49042	-5.17191	2.91798e-05	0.000159737	1.99736	PREDICTED: uncharacterized protein LOC101513522 n_1 Tax_Cicer arietinum RepID_UPI00032AAD0C	AT4G22190.1	unknown protein; Has 283 Blast hits	Medtr2g024980.1	hypothetical protein
Ca07499	Ca1	5770909	5773061	1.12454	3.94799	6.83567	5.26284e-07	6.90352e-06	6.06634	1-aminocyclopropane-1-carboxylate oxidase n_4 Tax_Papilionoideae RepID_Q19PX3_MEDSA	AT1G05010.1	ethylene-forming enzyme	Medtr2g025120.2	1-aminocyclopropane-1-carboxylate oxidase
Ca07526	Ca1	5792165	5796750	1.14189	7.00939	8.43432	1.52196e-08	6.0938e-07	9.59179	PREDICTED: ubiquinol oxidase 4 - chloroplastic/chromoplastic n_1 Tax_Cicer arietinum RepID_UPI00032ABEC8	AT4G22260.1	Alternative oxidase family protein	Medtr2g025140.1	ubiquinol oxidase
Ca07523	Ca1	5841330	5841950	-0.97234	2.44223	-7.56347	1.00569e-07	2.1742e-06	7.87435	PREDICTED: uncharacterized protein LOC101489543 n_1 Tax_Cicer arietinum RepID_UPI00032A57CD	AT1G62422.1	unknown protein; EXPRESSED IN: 22 plant	Medtr2g025410.1	hypothetical protein
Ca07517	Ca1	5897593	5903121	0.556185	5.48726	6.78864	5.87053e-07	7.42108e-06	5.90743	Phosphatidate cytidylyltransferase n_3 Tax_Medicago truncatula RepID_G7IM02_MEDTR	AT4G22340.1	cytidinediphosphate diacylglycerol	Medtr2g025550.2	phosphatidate cytidylyltransferase family protein
Ca07511	Ca1	5924942	5929997	0.359881	6.51063	4.96692	4.86584e-05	0.000242062	1.47901	Fumarylacetoacetase n_2 Tax_Papilionoideae RepID_Q2HT34_MEDTR	AT1G12050.1	fumarylacetoacetase, putative	Medtr2g025640.1	fumarylacetoacetase
Ca07509	Ca1	5931385	5932276	-1.02821	3.07399	-5.86588	5.28366e-06	4.10429e-05	3.83932	PREDICTED: BAG family molecular chaperone regulator 5 - mitochondrial n_1 Tax_Cicer arietinum RepID_UPI000640CC43	AT1G12060.1	BCL-2-associated athanogene	Medtr2g025690.1	BAG family molecular chaperone regulator 5
Ca07518	Ca1	5943323	5946735	-0.975346	3.80586	-7.99975	3.856e-08	1.14775e-06	8.70233	PREDICTED: rho GDP-dissociation inhibitor 1 n_1 Tax_Cicer arietinum RepID_UPI00032AA2FC	AT3G07880.1	Immunoglobulin E-set superfamily	Medtr2g025740.1	Rho GDP-dissociation inhibitor-like protein
Ca07531	Ca1	5996590	6000659	-0.923848	2.95767	-5.42336	1.56394e-05	9.60273e-05	2.77598	PREDICTED: tonoplast dicarboxylate transporter n_1 Tax_Cicer arietinum RepID_UPI00032A7080	AT5G47560.1	tonoplast dicarboxylate	Medtr2g026030.1	tonoplast dicarboxylate transporter
Ca07532	Ca1	6002304	6004115	1.22565	5.44253	7.17806	2.39532e-07	3.90581e-06	6.81336	Uncharacterized protein (Fragment) n_2 Tax_rosids RepID_R0I5H7_9BRAS	AT3G04400.1	Ribosomal protein L14p/L23e	Medtr1g069585.1	60S ribosomal L23-like protein
Ca07534	Ca1	6018701	6023326	-0.601934	5.64588	-5.86024	5.35656e-06	4.14214e-05	3.6831	PREDICTED: putative MO25-like protein At5g47540 n_1 Tax_Cicer arietinum RepID_UPI00032AC932	AT5G47540.1	Mo25 family protein	Medtr2g026050.1	calcium-binding protein
Ca07533	Ca1	6027006	6031810	-0.78762	7.28008	-6.73764	6.61131e-07	8.08889e-06	5.78871	Inositol monophosphatase family protein n_3 Tax_Papilionoideae RepID_G7IP84_MEDTR	AT3G02870.1	Inositol monophosphatase family	Medtr2g026060.1	inositol monophosphatase family protein
Ca07552	Ca1	6095067	6099331	1.12774	4.70922	6.26228	2.03163e-06	1.93366e-05	4.66862	PREDICTED: inositol transporter 4 n_1 Tax_Cicer arietinum RepID_UPI00032A8BAA	AT2G35740.1	nositol transporter 3	Medtr2g026160.1	inositol transporter%2C putative
Ca07559	Ca1	6278135	6282252	-1.13223	3.70937	-6.7702	6.12803e-07	7.60781e-06	5.92601	PREDICTED: FK506-binding protein 5-like n_1 Tax_Cicer arietinum RepID_UPI00032AC691			Medtr2g026685.3	heavy metal transport/detoxification superfamily protein
Ca07570	Ca1	6373496	6375268	0.710392	2.2382	6.50864	1.13163e-06	1.22928e-05	5.50136	C2 n_2 Tax_Medicago truncatula RepID_Q2HV28_MEDTR	AT5G47710.2	Calcium-dependent lipid-binding (CaLB	Medtr2g027100.1	ADP-ribosylation factor GTPase-activating AGD12-like protein
Ca07601	Ca1	6492994	6494680	-1.02117	1.40537	-5.37292	1.77173e-05	0.000106195	2.922	PREDICTED: uncharacterized protein At4g26485-like n_1 Tax_Cicer arietinum RepID_UPI00032AC2A4	AT1G55800.1	Domain of unknown function (DUF2431)	Medtr2g027540.1	nucleic acid-binding protein%2C putative
Ca07589	Ca1	6530617	6539298	0.823983	4.94444	7.41967	1.38708e-07	2.7234e-06	7.36523	PREDICTED: enhancer of mRNA-decapping protein 4-like isoform X1 n_1 Tax_Cicer arietinum RepID_UPI00032A8C47	AT3G13300.2	Transducin/WD40 repeat-like superfamily	Medtr2g027690.2	enhancer of mRNA-decapping-like protein
Ca07606	Ca1	6648470	6654136	-0.350589	5.27581	-5.41802	1.58471e-05	9.69529e-05	2.59408	Transducin/WD40 repeat protein n_2 Tax_Papilionoideae RepID_G7ISQ5_MEDTR	AT5G56190.1	Transducin/WD40 repeat-like superfamily	Medtr2g028050.1	transducin/WD40 repeat protein
Ca07638	Ca1	6723574	6726444	0.4099	4.70702	5.57613	1.07318e-05	7.02968e-05	2.99284	PREDICTED: protein TIC 20-IV - chloroplastic-like n_1 Tax_Cicer arietinum RepID_UPI00032AB662	AT4G03320.1	translocon at the inner envelope	Medtr2g090045.1	TIC protein 20-IV%2C related protein
Ca07645	Ca1	6899416	6904513	-0.719163	7.37556	-5.84881	5.50768e-06	4.22891e-05	3.65498	PREDICTED: putative E3 ubiquitin-protein ligase LIN isoform X1 n_2 Tax_Cicer arietinum RepID_UPI00032A6D39			Medtr2g028940.2	E3 ubiquitin-protein ligase LIN-like protein%2C putative
Ca07652	Ca1	7066344	7068476	2.44058	1.33334	6.27737	1.95973e-06	1.88398e-05	5.0835	PREDICTED: patatin-like protein 7 n_1 Tax_Cicer arietinum RepID_UPI00032ABB6F	AT3G54950.1	patatin-like protein	Medtr2g029510.1	patatin-like phospholipase
Ca07670	Ca1	7109188	7157888	-1.30134	6.47059	-5.51831	1.23729e-05	7.92478e-05	2.84776	Peroxidase n_1 Tax_Leersia perrieri RepID_A0A0D9X2X2_9ORYZ	AT2G38380.1	Peroxidase superfamily protein	Medtr2g029820.1	peroxidase family protein
Ca07669	Ca1	7160136	7163565	1.16495	2.93447	5.61419	9.77377e-06	6.59581e-05	3.26963	PREDICTED: U3 small nucleolar RNA-interacting protein 2-like n_1 Tax_Cicer arietinum RepID_UPI00032ACB30	AT4G05410.1	Transducin/WD40 repeat-like superfamily	Medtr2g029940.1	U3 small nucleolar RNA-associated-like protein
Ca07660	Ca1	7190669	7194107	1.78311	1.81926	9.46655	1.84791e-09	1.62436e-07	11.8132	PREDICTED: uncharacterized mitochondrial protein ymf11 n_1 Tax_Cicer arietinum RepID_UPI00032A7E1E	AT5G46920.1	Intron maturase, type II family protein	#N/A	#N/A
Ca07665	Ca1	7249772	7254969	-1.59719	1.21186	-5.46633	1.40651e-05	8.79859e-05	3.17425	Class III homeodomain leucine zipper protein n_12 Tax_fabids RepID_G7IKU0_MEDTR	AT2G34710.1	Homeobox-leucine	Medtr2g030130.1	class III homeodomain leucine zipper protein
Ca07678	Ca1	7292096	7297278	-1.70649	4.91691	-5.15945	3.00986e-05	0.000163945	1.95744	PREDICTED: 2-succinylbenzoate--CoA ligase - chloroplastic/peroxisomal isoform X1 n_2 Tax_Cicer arietinum RepID_UPI00032AD3CF	AT1G30520.1	acyl-activating enzyme 14	Medtr2g030240.2	2-succinylbenzoate-CoA ligase/peroxisomal protein
Ca07677	Ca1	7335456	7337826	0.70584	4.34055	4.77909	7.78744e-05	0.000357362	1.03074	PREDICTED: protein KRI1 homolog n_1 Tax_Cicer arietinum RepID_UPI00032AC185	AT3G24080.2	KRR1 family protein	Medtr2g030390.1	KRI1-like protein
Ca07691	Ca1	7513786	7521543	0.833499	2.39989	6.092	3.05676e-06	2.67313e-05	4.51058	PREDICTED: uncharacterized protein LOC101505368 isoform X1 n_1 Tax_Cicer arietinum RepID_UPI00032A771E	AT2G34780.2	maternal effect embryo arrest	Medtr2g031380.4	maternal effect embryo arrest protein
Ca07723	Ca1	7687996	7690236	2.69088	3.41733	7.07065	3.06128e-07	4.63587e-06	6.68211	PREDICTED: patellin-4 n_1 Tax_Cicer arietinum RepID_UPI00032A9DD6	AT1G30690.2	Sec14p-like phosphatidylinositol transfer	Medtr2g031610.1	Sec14p-like phosphatidylinositol transfer family protein
Ca07724	Ca1	7708386	7717410	0.551105	3.96871	7.15312	2.5354e-07	4.05638e-06	6.79525	PREDICTED: primase homolog protein n_1 Tax_Cicer arietinum RepID_UPI00032A5D1D	ATMG00860.1	DNA/RNA polymerases superfamily	Medtr1g052140.1	DNA/RNA polymerase superfamily protein%2C putative
Ca07737	Ca1	7976403	7978231	0.755818	2.76087	5.69632	7.99122e-06	5.61958e-05	3.47894	PREDICTED: probable protein phosphatase 2C 13 n_1 Tax_Cicer arietinum RepID_UPI00032A55EA	AT1G48040.1	Protein phosphatase 2C family protein	Medtr2g033000.1	protein phosphatase 2C-like protein
Ca07756	Ca1	8009164	8039576	-0.387099	5.02269	-6.25856	2.0498e-06	1.94611e-05	4.64827	E3 ubiquitin-protein ligase UPL6 n_2 Tax_Papilionoideae RepID_G7IL24_MEDTR	AT3G17205.3	ubiquitin protein ligase 6	Medtr2g033055.1	E3 ubiquitin-protein ligase UPL6-like protein
Ca07746	Ca1	8171795	8178018	-0.819651	4.93538	-8.30237	2.01295e-08	7.46473e-07	9.31112	PREDICTED: uncharacterized protein LOC101493668 n_1 Tax_Cicer arietinum RepID_UPI00032AB86B	AT5G49580.1	Chaperone DnaJ-domain superfamily protein	Medtr2g033460.2	chaperone DnaJ-domain protein
Ca07771	Ca1	8179607	8183155	1.02194	4.69847	9.78271	9.95586e-10	1.04298e-07	12.3484	PREDICTED: uncharacterized protein LOC101493348 n_1 Tax_Cicer arietinum RepID_UPI00032A8CC8	AT3G17170.1	Translation elongation factor	Medtr2g033490.1	30S ribosomal protein S6
Ca07767	Ca1	8240582	8242335	-0.527162	3.81954	-5.94517	4.35846e-06	3.55534e-05	3.94599	PREDICTED: ER membrane protein complex subunit 6 isoform X1 n_2 Tax_Cicer arietinum RepID_UPI00032A7E22	AT5G49540.1	Rab5-interacting family protein	Medtr2g097970.1	Rab5-interacting family protein
Ca07803	Ca1	8612820	8614166	-1.53759	6.13431	-11.2295	6.85014e-11	1.87095e-08	15.0332	Non-specific serine/threonine protein kinase n_2 Tax_Papilionoideae RepID_A0A072VCV6_MEDTR	AT5G25110.1	CBL-interacting protein	Medtr2g105010.1	CBL-interacting kinase
Ca07817	Ca1	8633775	8637319	-0.987917	5.34496	-5.3419	1.9132e-05	0.000113376	2.4057	Cinnamoyl-CoA reductase n_3 Tax_Papilionoideae RepID_V9I5Z3_9FABA	AT1G15950.1	cinnamoyl coa reductase	Medtr2g104960.1	cinnamoyl-CoA reductase-like protein
Ca07808	Ca1	8643350	8645879	-1.48734	3.81015	-5.58361	1.05363e-05	6.94326e-05	3.08197	Major intrinsic protein (MIP) family transporter n_2 Tax_Papilionoideae RepID_Q6J1S8_MEDTR	AT1G80760.1	NOD26-like intrinsic	Medtr2g104940.1	major intrinsic protein (MIP) family transporter
Ca07850	Ca1	8841298	8852892	0.635344	7.16317	5.61256	9.81299e-06	6.60606e-05	3.07669	Uncharacterized protein n_125 Tax_Embryophyta RepID_K4CC07_SOLLC	AT1G80070.1	Pre-mRNA-processing-splicing	Medtr2g103960.1	Pre-mRNA-processing-splicing factor 8
Ca07861	Ca1	8853690	8856757	0.511692	4.54672	5.12531	3.27696e-05	0.000175249	1.88203	Pti1-like kinase n_2 Tax_Papilionoideae RepID_G7II77_MEDTR	AT1G52540.1	Protein kinase superfamily protein	Medtr2g103950.1	Pti1-like kinase
Ca07841	Ca1	8914979	8915463	-1.12445	0.981038	-4.97527	4.76529e-05	0.000237853	2.03464	PREDICTED: uncharacterized protein LOC101513413 n_1 Tax_Cicer arietinum RepID_UPI00032ACCC3			Medtr2g103750.1	transmembrane protein%2C putative
Ca07832	Ca1	8947657	8952713	-1.03813	2.54419	-5.12299	3.29596e-05	0.000175811	2.1086	PREDICTED: probable polygalacturonase At3g15720 n_1 Tax_Cicer arietinum RepID_UPI00032AAC1B	AT5G44830.1	Pectin lyase-like superfamily protein	Medtr2g103650.1	polygalacturonase/glycoside hydrolase family protein
Ca07840	Ca1	8953598	8955251	-1.6583	5.34965	-9.54594	1.58024e-09	1.45674e-07	11.8765	PREDICTED: DCC family protein At1g52590 - chloroplastic n_1 Tax_Cicer arietinum RepID_UPI00032AC0CA			Medtr2g103590.1	thiol-disulfide oxidoreductase DCC
Ca07833	Ca1	8962189	8963376	0.835294	2.00087	5.20282	2.702e-05	0.000150117	2.41016	PREDICTED: pentatricopeptide repeat-containing protein At1g80150 - mitochondrial n_1 Tax_Cicer arietinum RepID_UPI00032A989A	AT1G80150.1	Tetratricopeptide repeat (TPR)-like	Medtr2g103550.2	PPR containing plant-like protein
Ca07871	Ca1	9015400	9020306	1.26522	1.60226	5.51236	1.25558e-05	8.0084e-05	3.24413	PREDICTED: probable polygalacturonase At1g80170 isoform X1 n_2 Tax_Cicer arietinum RepID_UPI00032AAA30	AT1G80170.1	Pectin lyase-like superfamily protein	Medtr2g103410.1	polygalacturonase
Ca07870	Ca1	9024251	9026043	-2.10366	1.24978	-6.07886	3.15502e-06	2.73871e-05	4.62133	PREDICTED: uncharacterized protein At1g15400-like n_1 Tax_Cicer arietinum RepID_UPI00032A88D2			Medtr2g103380.1	hypothetical protein
Ca07887	Ca1	9137392	9140459	-0.658572	3.8886	-5.03543	4.1004e-05	0.000210173	1.69907	PREDICTED: biotin carboxyl carrier protein of acetyl-CoA carboxylase 1 - chloroplastic isoform X1 n_2 Tax_Cicer arietinum RepID_UPI00032A8148			Medtr2g103280.1	biotin carboxyl carrier acetyl-CoA carboxylase
Ca07880	Ca1	9213936	9218441	-0.544424	3.43337	-6.06477	3.26406e-06	2.82374e-05	4.27487	Alpha/beta fold hydrolase n_2 Tax_Papilionoideae RepID_G7IMG6_MEDTR	AT1G15490.1	alpha/beta-Hydrolases superfamily protein	Medtr2g102800.1	alpha/beta fold hydrolase
Ca07874	Ca1	9229497	9232913	1.6358	3.61424	6.97538	3.81012e-07	5.48737e-06	6.51019	PREDICTED: ADP -ATP carrier protein 1 - chloroplastic-like n_1 Tax_Cicer arietinum RepID_UPI00032AA4C5	AT1G80300.1	nucleotide transporter	Medtr2g102740.1	plastidic ATP/ADP-transporter-like protein
Ca07881	Ca1	9274700	9287499	-1.47392	1.69043	-4.86998	6.20144e-05	0.000296254	1.65423	Gibberellin 3-beta-hydroxylase n_10 Tax_Papilionoideae RepID_A9P5X4_MEDSA	AT1G15550.1	gibberellin 3-oxidase	Medtr2g102570.1	gibberellin 2-beta-dioxygenase
Ca07899	Ca1	9329287	9341675	0.946893	4.50626	9.33377	2.40504e-09	1.92592e-07	11.4641	Amino-terminal acetyltransferase - putative n_3 Tax_Papilionoideae RepID_A0A072VDQ9_MEDTR	AT1G80410.1	tetratricopeptide repeat (TPR)-containing	Medtr2g102435.1	amine-terminal acetyltransferase%2C putative
Ca07901	Ca1	9364276	9375975	0.864506	6.43708	5.92666	4.55851e-06	3.66189e-05	3.84885	Coatomer subunit beta-like protein n_5 Tax_rosids RepID_A0A072VDQ5_MEDTR	AT1G52360.1	Coatomer, beta' subunit	Medtr2g102277.2	coatomer subunit beta-like protein
Ca07915	Ca1	9407871	9409093	-0.895542	4.112	-4.9038	5.69805e-05	0.000276785	1.35358	PREDICTED: uncharacterized protein LOC101503653 n_1 Tax_Cicer arietinum RepID_UPI00032A5C90			Medtr2g102237.5	DUF581 family protein
Ca07904	Ca1	9419801	9420611	-1.10628	0.659732	-6.35574	1.62581e-06	1.63168e-05	5.26689	No Hits			#N/A	#N/A
Ca07908	Ca1	9421067	9421833	-0.885653	1.85798	-5.44234	1.4923e-05	9.24454e-05	3.00921	No Hits			#N/A	#N/A
Ca07905	Ca1	9427510	9438920	-2.02528	3.31245	-10.4967	2.57665e-10	4.4784e-08	13.7533	PREDICTED: regulator of telomere elongation helicase 1 n_1 Tax_Cicer arietinum RepID_UPI00032AB9B0	AT1G79950.1	RAD3-like DNA-binding helicase protein	Medtr2g102150.3	regulator of telomere elongation helicase-like protein
Ca07909	Ca1	9440928	9441815	-1.69706	4.17765	-10.634	2.00101e-10	3.77846e-08	13.9715	PREDICTED: transcription repressor OFP14 n_1 Tax_Cicer arietinum RepID_UPI00032A50FA	AT1G79960.1	ovate family protein	Medtr2g102140.1	ovate transcriptional repressor
Ca07921	Ca1	9498619	9499477	0.719156	5.51913	5.55814	1.12174e-05	7.29777e-05	2.94205	Uncharacterized protein n_3 Tax_Phaseolus angularis RepID_A0A0S3SHN4_PHAAN	AT3G16080.1	Zinc-binding ribosomal protein family	Medtr0147s0070.1	60S ribosomal protein L37-1
Ca07922	Ca1	9526410	9529212	-2.01123	1.52081	-11.593	3.62993e-11	1.3219e-08	15.4815	PREDICTED: rop guanine nucleotide exchange factor 12-like n_1 Tax_Cicer arietinum RepID_UPI00032A7521	AT4G13240.1	RHO guanyl-nucleotide	Medtr2g101830.1	RHO guanyl-nucleotide exchange factor
Ca07928	Ca1	9575607	9579100	2.3793	2.22357	6.25933	2.04602e-06	1.94372e-05	4.95397	PREDICTED: protein NRT1/ PTR FAMILY 1.2-like n_1 Tax_Cicer arietinum RepID_UPI00032A5D8A	AT1G52190.1	Major facilitator superfamily protein	Medtr2g101640.1	peptide/nitrate transporter plant
Ca07931	Ca1	9585423	9589168	-1.3094	2.96555	-7.37106	1.54728e-07	2.91808e-06	7.38891	PREDICTED: transcription factor bHLH68-like n_1 Tax_Cicer arietinum RepID_UPI00032A6162			Medtr2g101520.1	BHLH transcription factor-like protein
Ca07942	Ca1	9616769	9619300	-0.52427	4.356	-5.16797	2.9467e-05	0.000161078	1.9942	PREDICTED: uncharacterized protein LOC101515592 n_1 Tax_Cicer arietinum RepID_UPI00032A5045	AT3G16200.1	unknown protein; Has 97 Blast hits	Medtr2g101480.1	transmembrane protein%2C putative
Ca07947	Ca1	9643675	9648743	1.45029	3.70316	8.87947	6.02703e-09	3.36436e-07	10.5949	PREDICTED: zinc phosphodiesterase ELAC protein 2 isoform X1 n_2 Tax_Cicer arietinum RepID_UPI00032AAD85	AT3G16260.1	tRNAse Z4	Medtr2g101390.1	zinc phosphodiesterase%2C putative
Ca07945	Ca1	9671090	9674861	0.678532	5.38671	5.22913	2.53089e-05	0.000142841	2.12813	PREDICTED: proteinaceous RNase P 1 - chloroplastic/mitochondrial n_1 Tax_Cicer arietinum RepID_UPI00032A55F2	AT2G32230.1	proteinaceous RNase P 1	Medtr2g101360.1	proteinaceous RNase P
Ca07960	Ca1	9707095	9715058	-0.658177	2.53364	-4.74109	8.56588e-05	0.000385226	1.15984	Homeobox protein 15 n_38 Tax_rosids RepID_M5WR53_PRUPE	AT1G52150.3	Homeobox-leucine	Medtr2g101190.1	class III homeodomain leucine zipper protein
Ca07954	Ca1	9876548	9880271	-0.805558	1.82167	-5.58718	1.04443e-05	6.89751e-05	3.36578	ATP-dependent 6-phosphofructokinase n_2 Tax_Papilionoideae RepID_G7IHY5_MEDTR	AT4G29220.1	phosphofructokinase 1	Medtr2g100710.1	6-phosphofructokinase
Ca07969	Ca1	9925001	9930381	0.657435	3.43238	7.33071	1.69464e-07	3.09671e-06	7.24627	PREDICTED: tRNA (uracil(54)-C(5))-methyltransferase homolog n_1 Tax_Cicer arietinum RepID_UPI00032ACCE4	AT3G21300.1	RNA methyltransferase family protein	Medtr2g100500.1	23S rRNA (uracil-5)-methyltransferase RumA
Ca07972	Ca1	10053226	10056827	1.52437	4.63863	12.0134	1.77261e-11	7.97413e-09	16.3952	PREDICTED: uncharacterized protein LOC101508069 n_1 Tax_Cicer arietinum RepID_UPI00032AAD1E	AT1G55140.1	Ribonuclease III family protein	Medtr2g100220.1	ribonuclease III domain protein
Ca08194	Ca1	10142083	10143489	-0.640626	1.76851	-4.91596	5.52724e-05	0.000270093	1.74028	PREDICTED: F-box/LRR-repeat protein At3g58980-like n_1 Tax_Cicer arietinum RepID_UPI00032A8EB3			Medtr2g099980.1	F-box/RNI superfamily protein
Ca08193	Ca1	10162371	10166699	-0.792223	7.94218	-4.87364	6.14477e-05	0.000294068	1.23425	PREDICTED: LOW QUALITY PROTEIN: glyoxylate/succinic semialdehyde reductase 2 - chloroplastic-like n_1 Tax_Cicer arietinum RepID_UPI0006412130	AT1G17650.1	glyoxylate reductase 2	Medtr2g099910.1	glyoxylate/succinic semialdehyde reductase
Ca07983	Ca1	10230563	10235575	-0.833799	6.16847	-11.84	2.37693e-11	1.03872e-08	16.0933	Casein kinase I-like protein n_3 Tax_Papilionoideae RepID_G7IS36_MEDTR	AT4G26100.1	casein kinase 1	Medtr2g099670.1	casein kinase I-like protein
Ca07987	Ca1	10240529	10243516	0.904213	5.38467	6.79534	5.77983e-07	7.37373e-06	5.9241	Putative uncharacterized protein n_2 Tax_Vitis vinifera RepID_D7TCM7_VITVI	AT3G13920.3	eukaryotic translation	Medtr2g099620.2	DEAD-box ATP-dependent RNA helicase
Ca07995	Ca1	10302970	10306789	1.47255	3.14707	9.9508	7.2023e-10	8.28265e-08	12.74	PREDICTED: nuclear transcription factor Y subunit A-3-like n_1 Tax_Cicer arietinum RepID_UPI00032AD2F9	AT1G72830.2	nuclear factor	Medtr2g099490.1	CCAAT-binding transcription factor
Ca08003	Ca1	10433547	10437577	-1.3577	4.64429	-12.0222	1.74629e-11	7.97413e-09	16.4047	PREDICTED: uncharacterized protein LOC101502274 n_1 Tax_Cicer arietinum RepID_UPI00032A56B0	AT1G08760.1	Plant protein of unknown function (DUF936)	Medtr2g099095.1	DUF936 family protein
Ca08006	Ca1	10440104	10443141	-1.11423	6.54703	-10.2626	3.98666e-10	5.64593e-08	13.2653	PREDICTED: hydroxyacylglutathione hydrolase 2 - mitochondrial-like isoform X1 n_2 Tax_Cicer arietinum RepID_UPI00032A6F87	AT1G06130.2	glyoxalase 2-4	Medtr2g099090.1	hydroxyacylglutathione hydrolase
Ca08002	Ca1	10466048	10467465	-1.36232	7.13086	-11.6897	3.0729e-11	1.20513e-08	15.8349	PREDICTED: B-box zinc finger protein 25-like n_1 Tax_Cicer arietinum RepID_UPI00032AB539	AT1G06040.2	B-box zinc finger family protein	Medtr2g099010.3	salt tolerance-like protein
Ca08024	Ca1	10626014	10629120	-0.368331	4.64768	-4.91661	5.5182e-05	0.000269737	1.35594	PREDICTED: ETHYLENE INSENSITIVE 3-like 3 protein n_1 Tax_Cicer arietinum RepID_UPI00032AABFA	AT1G73730.1	ETHYLENE-INSENSITIVE3-like	Medtr2g098470.1	ethylene insensitive transcription factor
Ca08040	Ca1	10693819	10697040	0.976015	5.5941	10.3834	3.18029e-10	4.97891e-08	13.4906	PREDICTED: uncharacterized protein LOC101488901 isoform X1 n_6 Tax_Cicer arietinum RepID_UPI00032ABA46	AT5G12930.1	unknown protein; Has 1807 Blast hits	Medtr2g098330.1	hypothetical protein
Ca08059	Ca1	10888373	10890342	0.84337	2.63642	5.56654	1.09878e-05	7.16973e-05	3.18461	PREDICTED: uncharacterized protein LOC101498103 n_1 Tax_Cicer arietinum RepID_UPI00032A56AE	AT5G52370.1	unknown protein; BEST Arabidopsis thaliana	Medtr2g097890.1	hypothetical protein
Ca08058	Ca1	10893759	10895610	0.614864	3.77606	5.3024	2.10997e-05	0.000122754	2.37668	Import inner membrane translocase protein n_2 Tax_Papilionoideae RepID_G7IRZ4_MEDTR			#N/A	#N/A
Ca08057	Ca1	10933630	10937469	1.55296	2.81658	7.84811	5.36526e-08	1.38852e-06	8.47219	PREDICTED: protein TOC75 - chloroplastic-like n_1 Tax_Cicer arietinum RepID_UPI00032A90FE	AT3G46740.1	translocon at the outer	Medtr2g097700.1	translocon at the outer envelope membrane ofs protein 75-III
Ca08054	Ca1	10948118	10948920	-0.896057	5.76866	-5.0159	4.30531e-05	0.000218834	1.59755	PREDICTED: uncharacterized protein LOC101501532 n_1 Tax_Cicer arietinum RepID_UPI00032A8826			#N/A	#N/A
Ca08066	Ca1	10949775	10957008	1.17926	5.49384	6.65751	7.97333e-07	9.28805e-06	5.59995	Nucleic acid binding NABP n_3 Tax_Papilionoideae RepID_Q2HS37_MEDTR	AT2G29190.2	pumilio 2	Medtr2g097670.2	pumilio Mpt5 protein%2C putative
Ca08072	Ca1	10994277	10996226	1.92157	4.03552	9.035	4.38741e-09	2.76154e-07	10.886	PREDICTED: uncharacterized protein C24B11.05-like n_1 Tax_Cicer arietinum RepID_UPI00032A7A50	AT5G59480.1	Haloacid dehalogenase-like hydrolase	Medtr2g097520.1	haloacid dehalogenase-like hydrolase
Ca08074	Ca1	11013608	11019706	1.7541	1.65288	5.58447	1.05139e-05	6.93149e-05	3.4096	PREDICTED: telomere repeat-binding protein 2 isoform X1 n_4 Tax_Cicer arietinum RepID_UPI0006417338	AT1G07540.1	TRF-like 2	Medtr2g097290.7	double-strand telomere-binding protein%2C putative
Ca08068	Ca1	11051147	11053134	-1.20993	5.99777	-5.06612	3.7981e-05	0.000197256	1.72466	Uncharacterized protein n_2 Tax_Soja RepID_I1LK20_SOYBN	AT2G28950.1		Medtr2g097030.2	expansin A10
Ca08079	Ca1	11099850	11102131	0.683404	9.05163	5.66218	8.68816e-06	5.99663e-05	3.15371	PREDICTED: outer envelope pore protein 16 - chloroplastic n_1 Tax_Cicer arietinum RepID_UPI00032A611E			Medtr2g096920.1	outer envelope pore protein
Ca08084	Ca1	11115140	11122042	-0.51226	4.49741	-5.05925	3.86375e-05	0.000200076	1.71663	PREDICTED: U-box domain-containing protein 33-like isoform X1 n_2 Tax_Cicer arietinum RepID_UPI00032A8A9A	AT2G19410.1	U-box domain-containing protein kinase	Medtr2g096850.1	U-box kinase family protein
Ca08085	Ca1	11125532	11128547	0.947061	2.4276	4.79463	7.48981e-05	0.000345884	1.32293	Actin-97 n_10 Tax_Mesangiospermae RepID_B4F989_MAIZE	AT5G09810.1	actin 7	Medtr2g096840.1	actin-97
Ca08083	Ca1	11146695	11147821	-1.06682	1.75893	-5.61534	9.7463e-06	6.58144e-05	3.44643	PREDICTED: dof zinc finger protein DOF3.1-like isoform X1 n_2 Tax_Cicer arietinum RepID_UPI00032A765E	AT3G55370.3	OBF-binding protein 3	Medtr2g096740.2	Dof domain zinc finger protein
Ca08078	Ca1	11170568	11174609	0.475889	5.45752	5.07501	3.71475e-05	0.000194114	1.74407	Uncharacterized protein n_4 Tax_Soja RepID_I1MDG6_SOYBN	AT3G46460.1	ubiquitin-conjugating enzyme 13	Medtr2g096690.1	ubiquitin-conjugating enzyme
Ca08090	Ca1	11207904	11210790	-0.986902	1.08905	-5.65244	8.89814e-06	6.10722e-05	3.62788	PREDICTED: ACT domain-containing protein ACR9-like isoform X1 n_1 Tax_Cicer arietinum RepID_UPI00032A74D7	AT2G39570.1	ACT domain-containing protein	Medtr2g096640.1	four ACT domain ACT domain protein which protein
Ca08096	Ca1	11235059	11235907	0.801019	5.48967	5.97182	4.08598e-06	3.36538e-05	3.95501	Histone H2A n_3 Tax_Pentapetalae RepID_V7BZ15_PHAVU	AT5G02560.2	histone H2A 12	Medtr2g096610.1	core histone H2A/H2B/H3/H4
Ca08107	Ca1	11291102	11293215	0.780419	5.96731	5.5311	1.19892e-05	7.71453e-05	2.87716	Uncharacterized protein n_29 Tax_Mesangiospermae RepID_I1MDJ2_SOYBN	AT3G55280.2	ribosomal protein L23AB	Medtr2g096340.2	60S ribosomal protein L23a-2
Ca08106	Ca1	11294571	11299692	-1.43114	7.43241	-5.04304	4.02329e-05	0.000206738	1.66322	3 -4-dihydroxy-2-butanone 4-phosphate synthase n_1 Tax_Medicago truncatula RepID_G7IHK9_MEDTR	AT5G59750.2	DHBP synthase RibB-like alpha/beta	Medtr2g096330.1	3%2C4-dihydroxy-2-butanone 4-phosphate synthase
Ca08133	Ca1	11596490	11600844	0.630916	2.80765	5.62732	9.46371e-06	6.43894e-05	3.30488	Uncharacterized protein n_10 Tax_Papilionoideae RepID_I1LTM0_SOYBN	AT2G28070.1	ABC-2 type transporter family protein	Medtr2g095390.1	white-brown-complex ABC transporter family protein
Ca08142	Ca1	11736817	11738584	1.01259	2.31575	4.65751	0.000105645	0.000458916	1.00737	PREDICTED: uncharacterized protein LOC101506031 isoform X2 n_2 Tax_Cicer arietinum RepID_UPI0006410F7E	AT5G60710.1	Zinc finger (C3HC4-type RING finger)	Medtr2g094930.1	zinc finger%2C C3HC4 type (RING finger) protein
Ca08146	Ca1	11815658	11820763	0.683102	4.54575	8.90357	5.73646e-09	3.28611e-07	10.5861	PREDICTED: GATA transcription factor 11-like n_1 Tax_Cicer arietinum RepID_UPI00032A9041	AT1G08000.2	GATA transcription factor 10	Medtr2g094600.1	GATA type zinc finger transcription factor family protein
Ca08165	Ca1	11897978	11898747	1.86686	2.43552	7.28698	1.87063e-07	3.31149e-06	7.27632	PREDICTED: uncharacterized protein LOC101512341 n_1 Tax_Cicer arietinum RepID_UPI00032A5D36	AT5G60680.1	Protein of unknown function, DUF584	Medtr2g094410.1	senescence regulator
Ca08155	Ca1	11914717	11916305	1.31336	8.18047	5.85378	5.44142e-06	4.19066e-05	3.6519	Aquaporin n_5 Tax_Papilionoideae RepID_Q8W4T8_MEDTR	AT2G39010.1	plasma membrane intrinsic	Medtr2g094270.2	major intrinsic protein (MIP) family transporter
Ca08162	Ca1	11959761	11962842	0.727357	6.57696	4.84544	6.59452e-05	0.00031121	1.17581	Galactose oxidase/kelch repeat protein n_3 Tax_Papilionoideae RepID_A0A072VBD7_MEDTR	AT5G60570.1	Galactose oxidase/kelch repeat superfamily	Medtr2g094093.1	galactose oxidase/kelch repeat protein
Ca08175	Ca1	11989767	11993372	-1.25016	6.43213	-6.33201	1.72031e-06	1.69975e-05	4.82929	PREDICTED: fasciclin-like arabinogalactan protein 12 n_1 Tax_Cicer arietinum RepID_UPI00032A7987	AT5G60490.1	FASCICLIN-like arabinogalactan-protein	Medtr2g093990.1	fasciclin-like arabinogalactan protein
Ca08169	Ca1	11996511	11997389	-3.91714	1.02271	-7.99573	3.88977e-08	1.15076e-06	8.77491	PREDICTED: fasciclin-like arabinogalactan protein 12 n_1 Tax_Cicer arietinum RepID_UPI00032A675E	AT5G60490.1	FASCICLIN-like arabinogalactan-protein	Medtr2g093970.1	fasciclin domain protein
Ca08167	Ca1	12076587	12079921	0.78101	3.12224	5.99877	3.82796e-06	3.18439e-05	4.15959	PREDICTED: adenylate kinase isoenzyme 6 homolog n_2 Tax_Cicer arietinum RepID_UPI00032A4ECA	AT5G60340.1	P-loop containing nucleoside triphosphate	Medtr5g087910.3	adenylate kinase%2C putative
Ca08223	Ca1	12270401	12287183	-0.839855	5.46836	-7.34262	1.64969e-07	3.0517e-06	7.18692	MAP kinase kinase kinase-like protein n_4 Tax_Papilionoideae RepID_G7IU31_MEDTR	AT2G31010.2	Protein kinase superfamily protein	Medtr2g092980.1	MAP kinase kinase kinase-like protein
Ca08214	Ca1	12321476	12326655	-1.64399	9.45693	-5.94183	4.39386e-06	3.57468e-05	3.82271	Phosphoenolpyruvate carboxylase 2 n_22 Tax_fabids RepID_A0A0B2RXX7_GLYSO	AT1G53310.3	phosphoenolpyruvate	Medtr2g092930.1	phosphoenolpyruvate carboxylase
Ca08216	Ca1	12357450	12361581	-0.854642	3.42074	-5.25699	2.36166e-05	0.000134782	2.29774	PREDICTED: bifunctional riboflavin kinase/FMN phosphatase-like n_1 Tax_Cicer arietinum RepID_UPI00032A5FAB			Medtr2g091220.2	riboflavin kinase/fmn hydrolase
Ca08221	Ca1	12385111	12388994	2.23419	3.78499	9.4866	1.77617e-09	1.57032e-07	11.8092	PREDICTED: ketol-acid reductoisomerase - chloroplastic n_1 Tax_Cicer arietinum RepID_UPI00032ACB61	AT3G58610.3	ketol-acid reductoisomerase	Medtr4g079780.1	ketol-acid reductoisomerase
Ca08231	Ca1	12396335	12399313	-0.526942	3.30925	-5.76269	6.79424e-06	4.98873e-05	3.55598	Adaptin ear-binding coat-associated protein 1 n_2 Tax_Papilionoideae RepID_I3T5Y3_MEDTR	AT3G58600.1	Adaptin ear-binding coat-associated	Medtr2g091185.1	adaptin ear-binding coat-associated protein 1
Ca08237	Ca1	12524416	12527795	2.02652	2.34923	5.74673	7.06435e-06	5.13542e-05	3.70892	Uncharacterized protein n_15 Tax_fabids RepID_I1LUJ6_SOYBN	AT4G28510.1	prohibitin 1	Medtr2g090760.1	prohibitin complex protein
Ca08235	Ca1	12555970	12558204	-0.773008	1.2177	-4.69715	9.56426e-05	0.000422424	1.31409	PREDICTED: LOW QUALITY PROTEIN: zinc finger protein MAGPIE-like n_1 Tax_Cicer arietinum RepID_UPI000640E541	AT1G03840.1	C2H2 and C2HC zinc fingers superfamily	Medtr2g090745.1	C2H2-like zinc finger protein%2C putative
Ca08260	Ca1	12649854	12652749	0.430445	3.22341	5.0972	3.51481e-05	0.00018576	1.93164	PREDICTED: protein NUCLEAR FUSION DEFECTIVE 6 - chloroplastic/mitochondrial-like isoform X1 n_5 Tax_Cicer arietinum RepID_UPI0006414900			Medtr2g090650.3	hypothetical protein
Ca08255	Ca1	12777538	12781788	-0.69356	3.62003	-5.84484	5.56112e-06	4.26566e-05	3.72003	PREDICTED: probable serine/threonine-protein kinase At1g54610 isoform X1 n_2 Tax_Cicer arietinum RepID_UPI00032ACCA7	AT5G44290.4	Protein kinase superfamily protein	Medtr2g090405.1	cyclin-dependent kinase
Ca08278	Ca1	12805312	12809575	0.57033	4.27701	6.75464	6.35425e-07	7.82514e-06	5.8543	PREDICTED: mannan endo-1 -4-beta-mannosidase 2 n_1 Tax_Cicer arietinum RepID_UPI00032ABF8F	AT2G20680.1	Glycosyl hydrolase superfamily	Medtr2g090390.1	glycoside hydrolase family 5 protein
Ca08283	Ca1	12885186	12887398	-0.420797	4.13822	-4.88988	5.9e-05	0.00028467	1.31573	PREDICTED: uncharacterized protein LOC101496693 n_1 Tax_Cicer arietinum RepID_UPI00032A7D5E	AT4G28260.2	unknown protein; FUNCTIONS IN: molecular_function	Medtr2g090285.1	hypothetical protein
Ca08274	Ca1	12902571	12907771	0.638534	5.07303	6.05576	3.33579e-06	2.86473e-05	4.15971	PREDICTED: probable L-type lectin-domain containing receptor kinase VII.2 n_1 Tax_Cicer arietinum RepID_UPI00032A5E96	AT4G04960.1	Concanavalin A-like lectin protein	Medtr2g090250.1	lectin receptor kinase
Ca08275	Ca1	12914818	12920018	0.638798	5.09735	5.97074	4.09662e-06	3.37051e-05	3.95307	PREDICTED: probable L-type lectin-domain containing receptor kinase VII.2 n_1 Tax_Cicer arietinum RepID_UPI00032A5E96	AT4G04960.1	Concanavalin A-like lectin protein	Medtr2g090250.1	lectin receptor kinase
Ca08277	Ca1	12983847	12984368	-0.578773	8.10553	-5.28057	2.22743e-05	0.000128222	2.24387	PREDICTED: photosystem II repair protein PSB27-H1 - chloroplastic n_1 Tax_Cicer arietinum RepID_UPI00032A80DF	AT1G03600.1	photosystem II family protein	Medtr2g090200.1	photosystem II Pbs27 protein
Ca08300	Ca1	13021253	13024388	-0.557118	3.94587	-6.87066	4.85269e-07	6.53938e-06	6.14056	PREDICTED: tetratricopeptide repeat protein 1-like n_2 Tax_Cicer arietinum RepID_UPI00032A5D81	AT4G30480.3	Tetratricopeptide repeat	Medtr2g090135.2	heat shock protein 70 (HSP70)-interacting protein%2C putative
Ca08304	Ca1	13067636	13069263	-1.43678	3.28032	-5.30971	2.07207e-05	0.000120987	2.45327	PREDICTED: QWRF motif-containing protein 4-like isoform X2 n_2 Tax_Cicer arietinum RepID_UPI000640DCA4	AT2G20830.1	transferases;folic acid binding	Medtr2g090055.1	formiminotransferase-cyclodeaminase-like protein
Ca08312	Ca1	13320173	13322603	4.42687	4.88101	7.37559	1.53158e-07	2.90223e-06	7.31702	Xyloglucan endotransglucosylase/hydrolase n_4 Tax_Papilionoideae RepID_G7IRJ7_MEDTR	AT4G03210.2	xyloglucan endotransglucosylase/hydrolase	Medtr2g089140.2	xyloglucan endotransglucosylase/hydrolase family protein
Ca08321	Ca1	13420432	13425478	-1.30147	6.80743	-7.45957	1.26833e-07	2.55925e-06	7.45466	Beta-amylase n_1 Tax_Medicago truncatula RepID_G7IKM6_MEDTR	AT2G32290.1	beta-amylase 6	Medtr2g089030.1	beta-amylase
Ca08325	Ca1	13488825	13490076	-1.31811	6.74917	-8.06163	3.37272e-08	1.06582e-06	8.79172	PREDICTED: cyclin-U1-1 n_1 Tax_Cicer arietinum RepID_UPI00032A74F8	AT3G21870.1	cyclin p2;1	Medtr2g088860.1	cyclin p4
Ca08343	Ca1	13587397	13596247	0.703053	4.75623	8.88066	6.01234e-09	3.36436e-07	10.5356	PREDICTED: choline/ethanolaminephosphotransferase 1 n_2 Tax_Cicer arietinum RepID_UPI00032AAE97	AT1G13560.1	aminoalcoholphosphotransferase	Medtr6g018970.1	aminoalcoholphosphotransferase
Ca08341	Ca1	13606445	13612742	-0.655481	4.86383	-5.09183	3.56215e-05	0.000187743	1.78916	Uncharacterized protein n_3 Tax_Papilionoideae RepID_K7LTZ8_SOYBN	AT1G05230.4	homeodomain GLABROUS 2	Medtr2g088470.1	homeobox leucine zipper protein
Ca08362	Ca1	13853793	13859236	0.807043	2.76512	6.54554	1.03729e-06	1.14254e-05	5.52087	PREDICTED: DNA-directed RNA polymerases II - IV and V subunit 8B-like n_1 Tax_Cicer arietinum RepID_UPI00032A89F7	AT3G18524.1	MUTS homolog 2	Medtr4g111945.1	DNA mismatch repair MSH3-like protein
Ca08361	Ca1	13867953	13872042	-0.896687	7.4908	-5.50715	1.27179e-05	8.08142e-05	2.81449	PREDICTED: linolenate hydroperoxide lyase - chloroplastic n_1 Tax_Cicer arietinum RepID_UPI00032AAB38	AT4G15440.1	hydroperoxide lyase 1	Medtr2g087890.1	fatty acid hydroperoxide lyase
Ca08368	Ca1	13915355	13917760	2.75717	0.748098	6.17707	2.49143e-06	2.26477e-05	4.85692	PREDICTED: fasciclin-like arabinogalactan protein 15 n_1 Tax_Cicer arietinum RepID_UPI00032A9D04	AT2G35860.1	FASCICLIN-like arabinogalactan	Medtr2g087810.1	fasciclin-like arabinogalactan protein 16 precursor
Ca08372	Ca1	13957825	13967653	0.628223	3.21906	6.20489	2.3307e-06	2.15297e-05	4.64208	PREDICTED: ubiquitin carboxyl-terminal hydrolase 8 n_1 Tax_Cicer arietinum RepID_UPI00032A9B66	AT5G22030.1	ubiquitin-specific protease 8	Medtr2g087710.1	ubiquitin carboxyl-terminal hydrolase
Ca08382	Ca1	14029813	14034370	-0.485729	3.16447	-4.95034	5.07177e-05	0.00025072	1.57226	Uncharacterized protein n_9 Tax_Papilionoideae RepID_A0A0S3SH60_PHAAN			#N/A	#N/A
Ca08377	Ca1	14067916	14073424	1.10096	3.71934	6.21107	2.29642e-06	2.12871e-05	4.60462	PREDICTED: transcription factor LHW n_1 Tax_Cicer arietinum RepID_UPI00032A7C79	AT2G27230.2	transcription factor-related	Medtr2g087295.1	bHLH transcription factor-like protein
Ca08387	Ca1	14118815	14125655	-1.2066	3.73237	-6.63347	8.43561e-07	9.67186e-06	5.60623	PREDICTED: serine/threonine-protein kinase Nek6-like isoform X1 n_2 Tax_Cicer arietinum RepID_UPI00032A85B4	AT3G44200.1	NIMA (never in mitosis,	Medtr2g087090.1	Serine/Threonine-kinase Nek4
Ca08393	Ca1	14245569	14247625	-1.45801	2.26074	-8.42924	1.53834e-08	6.12731e-07	9.75226	PREDICTED: uncharacterized protein LOC101502277 n_1 Tax_Cicer arietinum RepID_UPI00032AA613	AT5G22430.1	Pollen Ole e 1 allergen and extensin	Medtr2g086680.1	pollen Ole e I family allergens
Ca08399	Ca1	14263332	14264154	1.16716	5.83464	6.76203	6.24578e-07	7.72891e-06	5.847	Ribosomal protein S25 n_42 Tax_eudicotyledons RepID_B7FGM7_MEDTR			Medtr4g070600.2	ribosomal protein S25
Ca08391	Ca1	14268640	14271793	-0.555236	5.81434	-5.72907	7.37594e-06	5.28924e-05	3.3632	N-carbamoylputrescine amidase n_14 Tax_Papilionoideae RepID_A0A0B2RKL6_GLYSO	AT2G27450.1	nitrilase-like protein	Medtr2g086600.1	N-carbamoylputrescine amidohydrolase%2C putative
Ca08420	Ca1	14310157	14312792	1.3784	6.01485	7.07242	3.04892e-07	4.63024e-06	6.57055	Ribosomal protein n_35 Tax_Mesangiospermae RepID_A0A0S3SGW2_PHAAN	AT1G08360.1	Ribosomal protein L1p/L10e family	Medtr3g070930.2	ribosomal protein L1p/L10e family protein
Ca08421	Ca1	14320587	14322461	-1.50526	4.12672	-6.25101	2.08713e-06	1.97908e-05	4.66607	PREDICTED: uncharacterized protein LOC101506129 isoform X1 n_2 Tax_Cicer arietinum RepID_UPI00032A6712	AT3G04030.1	Homeodomain-like superfamily protein	Medtr2g086450.1	myb-like transcription factor family protein
Ca08406	Ca1	14395809	14398593	-1.77181	0.662445	-6.22943	2.1977e-06	2.05589e-05	4.9814	PREDICTED: zinc finger protein WIP3-like n_1 Tax_Cicer arietinum RepID_UPI00032A831E	AT1G08290.1	WIP domain protein 3	Medtr1g093095.1	C2H2-type zinc finger protein
Ca08407	Ca1	14423897	14429457	-0.508836	3.97891	-5.6038	1.00264e-05	6.70255e-05	3.09705	PREDICTED: protein HIRA-like isoform X1 n_2 Tax_Cicer arietinum RepID_UPI00032A9D78	AT3G44530.1	homolog of histone chaperone HIRA	Medtr2g086140.1	histone transcription regulator HIRA protein
Ca08426	Ca1	14514934	14516342	0.924948	5.43109	5.79412	6.29255e-06	4.69904e-05	3.52204	60S acidic ribosomal protein n_2 Tax_Medicago truncatula RepID_B7FMX7_MEDTR			#N/A	#N/A
Ca08430	Ca1	14518479	14525623	0.513114	3.6011	5.24571	2.42879e-05	0.000137944	2.25417	Peptidyl-prolyl cis-trans isomerase - putative n_3 Tax_Papilionoideae RepID_A0A072VAB3_MEDTR	AT3G44600.1	cyclophilin71	Medtr2g085075.1	peptidyl-prolyl cis-trans isomerase%2C putative
Ca08432	Ca1	14528538	14533308	1.04955	1.86642	6.20024	2.3568e-06	2.17152e-05	4.83333	PREDICTED: serine/threonine-protein kinase D6PKL2 n_1 Tax_Cicer arietinum RepID_UPI00032A7CD0	AT3G44610.1	Protein kinase superfamily protein	Medtr2g085065.1	Serine/Threonine kinase family protein
Ca08442	Ca1	14694645	14697629	2.40282	4.42308	7.07069	3.06097e-07	4.63587e-06	6.60462	PREDICTED: histone deacetylase HDT1-like n_1 Tax_Cicer arietinum RepID_UPI00032A9377			Medtr2g084815.4	histone deacetylase 2a%2C putative
Ca08452	Ca1	14902258	14908644	-0.370044	4.65821	-4.93621	5.25424e-05	0.000258321	1.40437	PREDICTED: uncharacterized protein LOC101496252 n_1 Tax_Cicer arietinum RepID_UPI00032A5594	AT2G27980.1	Acyl-CoA N-acyltransferase with RING/FYVE/PHD-type	Medtr2g084425.1	RING/FYVE/PHD zinc finger protein
Ca08460	Ca1	15027103	15031271	-1.25205	0.0186757	-4.58424	0.000126981	0.000534151	1.18244	PREDICTED: putative two-component response regulator ARR21 n_1 Tax_Cicer arietinum RepID_UPI00032AA92A			Medtr2g084230.2	myb-like DNA-binding domain%2C shaqkyf class protein
Ca08516	Ca1	15526708	15527904	-1.05736	5.70723	-5.83306	5.72288e-06	4.36566e-05	3.61719	PREDICTED: uncharacterized protein LOC101514187 n_1 Tax_Cicer arietinum RepID_UPI00032AB2C8	AT3G20680.1	Domain of unknown function (DUF1995)	Medtr2g082660.1	plant/F3H11-7 protein
Ca08514	Ca1	15549750	15555588	-0.587784	5.0091	-4.9867	4.63112e-05	0.000232239	1.52356	Kinesin-like protein n_3 Tax_Papilionoideae RepID_G7IHD4_MEDTR	AT4G27180.1	kinesin 2	Medtr4g081390.2	kinesin motor catalytic domain protein
Ca08526	Ca1	15764723	15767811	-1.63187	2.41525	-6.26943	1.99723e-06	1.90923e-05	4.91154	PREDICTED: transcription factor bHLH123-like isoform X1 n_4 Tax_Cicer arietinum RepID_UPI00032AB18B			Medtr2g081820.1	BHLH transcription factor-like protein
Ca08556	Ca1	15988096	16005760	-0.627225	2.3733	-5.00765	4.39501e-05	0.000222662	1.84921	Double-strand break repair protein Mre11 n_3 Tax_Papilionoideae RepID_G7IR61_MEDTR	AT5G54260.1	DNA repair and meiosis	Medtr2g081100.2	double-strand break repair protein Mre11
Ca08555	Ca1	16008149	16009310	-0.560188	11.9546	-5.3064	2.08913e-05	0.000121772	2.14166	Chlorophyll a-b binding protein 13 - chloroplastic n_89 Tax_Mesangiospermae RepID_CB23_SOLLC	AT5G54270.1	light-harvesting chlorophyll	Medtr2g081090.1	light-harvesting complex I chlorophyll A/B-binding protein
Ca08557	Ca1	16079305	16083442	-0.862945	5.1268	-5.60639	9.96282e-06	6.66877e-05	3.05965	PREDICTED: uncharacterized protein LOC101503245 n_1 Tax_Cicer arietinum RepID_UPI00032A9D1C			Medtr2g080290.2	transmembrane protein%2C putative
Ca08550	Ca1	16112456	16116715	-1.06131	4.28445	-5.58587	1.04779e-05	6.91669e-05	3.03296	Catalytic/protein phosphatase type 2C n_4 Tax_Papilionoideae RepID_G7I3N5_MEDTR	AT1G47380.1	Protein phosphatase 2C family protein	Medtr3g101540.2	catalytic/protein phosphatase type 2C
Ca08548	Ca1	16157985	16161162	-1.23314	8.08392	-4.95895	4.96375e-05	0.000246016	1.44318	PREDICTED: uncharacterized protein LOC101505712 n_1 Tax_Cicer arietinum RepID_UPI00032A7043	AT1G52870.1	Peroxisomal membrane 22 kDa (Mpv17/PMP22)	Medtr2g080040.1	peroxisomal membrane 22 kDa (Mpv17/PMP22) family protein
Ca08576	Ca1	16395157	16397198	3.51898	2.55919	6.62018	8.70284e-07	9.91139e-06	5.76499	PREDICTED: CBS domain-containing protein CBSX5 n_1 Tax_Cicer arietinum RepID_UPI00032A9B51	AT4G27460.1	Cystathionine beta-synthase (CBS) family	Medtr2g079630.1	CBS domain CBSX5-like protein
Ca08581	Ca1	16413006	16422123	-0.695785	4.12144	-8.71239	8.50696e-09	4.17032e-07	10.2027	PREDICTED: plant intracellular Ras-group-related LRR protein 6 n_1 Tax_Cicer arietinum RepID_UPI00032A68F3	AT3G15410.1	Leucine-rich repeat (LRR) family protein	Medtr2g079560.2	LRR receptor-like kinase
Ca08589	Ca1	16524046	16525988	0.606271	6.34866	5.38973	1.69955e-05	0.000102502	2.52928	Uncharacterized protein n_3 Tax_Pentapetalae RepID_A0A0D2S4U3_GOSRA	AT3G47370.3	Ribosomal protein S10p/S20e family	Medtr7g092720.1	40S ribosomal protein S20-2
Ca08587	Ca1	16575394	16580705	-0.708855	7.20268	-5.9292	4.53053e-06	3.649e-05	3.85241	Ubiquitin ligase cop1 - putative n_2 Tax_Papilionoideae RepID_G7IRA7_MEDTR	AT3G15354.1	SPA1-related 3	Medtr2g085210.3	ubiquitin ligase cop1%2C putative
Ca08631	Ca1	17048473	17052249	-0.991835	3.01135	-7.9528	4.26984e-08	1.19526e-06	8.66772	PREDICTED: two-component response regulator ARR1-like isoform X1 n_1 Tax_Cicer arietinum RepID_UPI00032A7383	AT3G16857.1	response regulator 1	Medtr2g034960.1	B-type response regulator
Ca08629	Ca1	17058997	17062708	-0.556793	5.04188	-4.81619	7.09583e-05	0.000331088	1.09821	PREDICTED: protein DEHYDRATION-INDUCED 19 homolog 4-like n_1 Tax_Cicer arietinum RepID_UPI00032A93BB	AT3G06760.2	Drought-responsive family protein	Medtr2g035070.1	drought-induced protein
Ca08643	Ca1	17137822	17141169	1.83475	5.38699	6.71458	6.97691e-07	8.34991e-06	5.73769	PREDICTED: probable polygalacturonase n_1 Tax_Cicer arietinum RepID_UPI00032A6D84	AT3G06770.1	Pectin lyase-like superfamily protein	Medtr2g435340.3	polygalacturonase/glycoside hydrolase family protein
Ca08633	Ca1	17276220	17278066	-0.717508	4.30237	-7.03653	3.3104e-07	4.94416e-06	6.50438	PREDICTED: ethylene-responsive transcription factor RAP2-3 n_1 Tax_Cicer arietinum RepID_UPI00032AA710	AT3G16770.1	ethylene-responsive	Medtr2g435590.1	ethylene response factor
Ca08652	Ca1	17332204	17336178	0.563093	4.29715	5.36594	1.8026e-05	0.000107867	2.49112	Uncharacterized protein n_8 Tax_Papilionoideae RepID_C6T027_SOYBN			Medtr1g087370.1	transcription initiation factor TFIID subunit
Ca08648	Ca1	17352661	17357710	1.09795	1.33938	5.58851	1.04101e-05	6.88083e-05	3.45337	PREDICTED: condensin-2 complex subunit H2 n_1 Tax_Cicer arietinum RepID_UPI00032A4FBF	AT3G16730.1	CONTAINS InterPro DOMAIN/s: Non-SMC	Medtr2g436080.1	condensin-2 complex subunit H2-like protein
Ca08663	Ca1	17506425	17514672	2.17463	4.24053	10.4026	3.06834e-10	4.94003e-08	13.5572	PREDICTED: putative E3 ubiquitin-protein ligase LIN-1 n_1 Tax_Cicer arietinum RepID_UPI00032A9A31	AT3G06880.2	Transducin/WD40 repeat-like superfamily	Medtr2g436530.1	E3 ubiquitin-protein ligase LIN-like protein%2C putative
Ca08661	Ca1	17553033	17555487	0.761451	8.16395	5.35094	1.87083e-05	0.000111383	2.41541	Callus protein P23 n_2 Tax_Populus RepID_B9N4J2_POPTR	AT3G16640.1	translationally controlled tumor	Medtr2g436620.1	translationally-controlled tumor-like protein
Ca08664	Ca1	17577654	17586547	1.06464	4.70416	7.39709	1.45924e-07	2.83184e-06	7.32138	PREDICTED: ABC transporter C family member 14-like n_1 Tax_Cicer arietinum RepID_UPI00032A4E7D	AT3G62700.1	multidrug resistance-associated	Medtr2g436730.1	multidrug resistance protein ABC transporter family protein
Ca08676	Ca1	17666721	17670597	-1.04319	3.77044	-6.28926	1.90488e-06	1.83934e-05	4.7822	Uncharacterized protein n_2 Tax_Papilionoideae RepID_A0A072V7E7_MEDTR			Medtr2g436860.1	hypothetical protein
Ca08682	Ca1	17821492	17822655	-1.70694	3.59011	-9.14172	3.53485e-09	2.40291e-07	11.1436	PREDICTED: B-box zinc finger protein 18-like n_1 Tax_Cicer arietinum RepID_UPI00032A9FC3	AT4G27310.1	B-box type zinc finger family protein	Medtr2g089310.1	B-box type zinc finger protein
Ca08704	Ca1	17981742	17987959	-0.525014	4.00619	-5.57494	1.07632e-05	7.04722e-05	3.02377	Substrate carrier family protein n_3 Tax_Papilionoideae RepID_A0A072V7F3_MEDTR	AT5G48970.1	Mitochondrial substrate carrier family	Medtr2g436930.3	substrate carrier family protein
Ca08717	Ca1	18220624	18222696	-0.966978	1.82505	-4.64691	0.000108493	0.000469289	1.07054	PREDICTED: haloacid dehalogenase-like hydrolase domain-containing protein 3 n_1 Tax_Cicer arietinum RepID_UPI00032AD2BE	AT5G44730.1	Haloacid dehalogenase-like hydrolase	Medtr2g035440.4	haloacid dehalogenase-like hydrolase domain protein
Ca08715	Ca1	18234301	18236073	-0.934802	5.02174	-6.02587	3.58534e-06	3.02637e-05	4.0884	Cationic amino acid transporter n_3 Tax_Papilionoideae RepID_G7INC3_MEDTR	AT2G34960.1	cationic amino acid transporter	Medtr2g035430.1	cationic amino acid transporter
Ca08718	Ca1	18237955	18241851	-1.16004	4.29193	-7.83315	5.54396e-08	1.42035e-06	8.30706	PREDICTED: haloacid dehalogenase-like hydrolase domain-containing protein 3 isoform X1 n_4 Tax_Cicer arietinum RepID_UPI0006414B91	AT5G44730.1	Haloacid dehalogenase-like hydrolase	Medtr2g035440.4	haloacid dehalogenase-like hydrolase domain protein
Ca08725	Ca1	18360935	18363729	-1.09647	0.166721	-4.74631	8.45451e-05	0.000382127	1.55672	PREDICTED: polygalacturonase QRT3 n_1 Tax_Cicer arietinum RepID_UPI00032A5266	AT4G20040.1	Pectin lyase-like superfamily protein	Medtr2g035790.1	polygalacturonase QRT3-like protein
Ca08738	Ca1	18406626	18407033	1.1413	5.94775	6.46725	1.24793e-06	1.32014e-05	5.15005	60S ribosomal protein L27 n_6 Tax_fabids RepID_W9SC93_9ROSA	AT3G22230.1	Ribosomal L27e protein family	Medtr2g006170.1	60S ribosomal protein L27-1
Ca08747	Ca1	18562354	18569083	-0.747429	4.49079	-7.94221	4.36931e-08	1.21286e-06	8.53803	Uncharacterized protein n_14 Tax_Papilionoideae RepID_I1L2T5_SOYBN	AT5G60620.1	glycerol-3-phosphate acyltransferase	Medtr4g127910.1	phospholipid/glycerol acyltransferase family protein
Ca08782	Ca1	18942540	18953632	0.493537	5.53867	6.89272	4.61108e-07	6.297e-06	6.15126	PREDICTED: pumilio homolog 6 - chloroplastic n_1 Tax_Cicer arietinum RepID_UPI0006412DFC	AT4G25880.1	pumilio 6	Medtr2g036900.2	pumilio-family RNA-binding repeatprotein
Ca08806	Ca1	19269335	19299035	0.551373	4.07663	5.28367	2.21032e-05	0.000127525	2.30222	PREDICTED: putative pentatricopeptide repeat-containing protein At3g01580 n_1 Tax_Cicer arietinum RepID_UPI00032A7025	AT3G01580.1	Tetratricopeptide repeat (TPR)-like	Medtr4g015760.4	PPR containing plant-like protein
Ca08836	Ca1	19719143	19749230	0.884915	6.95511	5.6836	8.24405e-06	5.76029e-05	3.25288	60S ribosomal protein L7 n_8 Tax_Papilionoideae RepID_Q2HVI3_MEDTR	AT1G13130.1	Cellulase (glycosyl hydrolase family	Medtr8g089775.1	glycoside hydrolase family 5 protein
Ca08848	Ca1	20009185	20013457	1.49629	2.45047	5.79529	6.27466e-06	4.69066e-05	3.78021	PREDICTED: putative disease resistance protein At1g50180 n_1 Tax_Cicer arietinum RepID_UPI00032A7DA0	AT5G35450.1	Disease resistance protein (CC-NBS-LRR	Medtr2g038510.1	disease resistance protein (CC-NBS-LRR class) family protein
Ca08857	Ca1	20119021	20124764	-0.786983	5.3333	-5.5912	1.03416e-05	6.85837e-05	3.0219	PREDICTED: uncharacterized protein LOC101498984 isoform X1 n_2 Tax_Cicer arietinum RepID_UPI0006411DC6			Medtr2g038710.1	hypothetical protein
Ca08864	Ca1	20218538	20225904	0.482322	5.49992	5.74683	7.06262e-06	5.13542e-05	3.40518	FVE n_14 Tax_Papilionoideae RepID_Q52ZH8_PEA	AT2G19520.1		Medtr2g039250.1	nucleosome/chromatin assembly factor group protein
Ca08960	Ca1	20578328	20606063	1.20517	6.97048	6.5128	1.12058e-06	1.21987e-05	5.25861	Nucleosome assembly protein n_7 Tax_Papilionoideae RepID_G7IIL4_MEDTR	AT4G23160.1	cysteine-rich RLK (RECEPTOR-like	Medtr2g039680.2	nucleosome assembly protein
Ca08886	Ca1	20948920	20952243	-0.541379	4.71499	-4.88715	5.94049e-05	0.000286263	1.28111	Methylthioribose-1-phosphate isomerase n_3 Tax_Papilionoideae RepID_G7IGG7_MEDTR	AT2G05830.3	NagB/RpiA/CoA transferase-like superfamily	Medtr2g042450.1	methylthioribose-1-phosphate isomerase
Ca08899	Ca1	21148302	21156394	0.612039	4.22528	7.32222	1.72739e-07	3.14156e-06	7.16737	PREDICTED: tubulin--tyrosine ligase-like protein 12 isoform X1 n_2 Tax_Cicer arietinum RepID_UPI00032A9B0B	AT1G77550.1	tubulin-tyrosine ligases;tubulin-tyrosine	Medtr2g041640.1	tubulin-tyrosine ligase family protein
Ca08910	Ca1	21355847	21361117	-0.602645	2.9101	-6.0559	3.33463e-06	2.86473e-05	4.32136	Small nuclear ribonucleoprotein n_4 Tax_Papilionoideae RepID_G7IIN9_MEDTR	AT3G14080.2	Small nuclear ribonucleoprotein family	Medtr2g042700.2	small nuclear ribonucleoprotein
Ca08914	Ca1	21369766	21373025	-0.931582	8.65412	-6.57494	9.67907e-07	1.07823e-05	5.37786	Light-harvesting complex I chlorophyll A/B-binding protein n_4 Tax_Papilionoideae RepID_G7IIP1_MEDTR	AT1G19150.1	photosystem I light harvesting	Medtr2g042720.1	light-harvesting complex I chlorophyll A/B-binding protein
Ca08948	Ca1	21800149	21803431	1.02061	7.84814	4.8952	5.82203e-05	0.00028153	1.28795	PREDICTED: 20 kDa chaperonin - chloroplastic-like n_1 Tax_Cicer arietinum RepID_UPI00032AA6FE	AT5G20720.3	chaperonin 20	Medtr2g043230.1	GroES chaperonin
Ca08949	Ca1	21875667	21882488	1.06534	2.72992	7.19703	2.29413e-07	3.80985e-06	7.03005	PREDICTED: DEAD-box ATP-dependent RNA helicase 17 isoform X1 n_2 Tax_Cicer arietinum RepID_UPI00032A63A8	AT2G40700.1	P-loop containing nucleoside triphosphate	Medtr4g059460.1	DEAD-box ATP-dependent RNA helicase-like protein
Ca08986	Ca1	22228878	22238357	-2.23103	4.62627	-6.29172	1.89373e-06	1.82973e-05	4.74819	PREDICTED: respiratory burst oxidase homolog protein E n_1 Tax_Cicer arietinum RepID_UPI00032AABA6	AT1G19230.2	Riboflavin synthase-like superfamily	Medtr2g043900.3	respiratory burst oxidase-like protein
Ca08992	Ca1	22478162	22480408	-1.11104	0.897826	-6.26985	1.99525e-06	1.90852e-05	5.07553	PREDICTED: E3 ubiquitin-protein ligase RNF144A-like isoform X1 n_1 Tax_Cicer arietinum RepID_UPI00032AB7DD	AT3G53690.1	RING/U-box superfamily protein	Medtr2g044440.1	zinc finger%2C C3HC4 type (RING finger) protein
Ca09015	Ca1	22832051	22835130	-1.21103	3.70299	-7.14473	2.58434e-07	4.11744e-06	6.79735	PREDICTED: protein TIFY 3B-like n_1 Tax_Cicer arietinum RepID_UPI00032A5793			Medtr2g044910.1	divergent CCT motif protein
Ca09029	Ca1	23022622	23023641	1.47973	0.364938	5.94788	4.32989e-06	3.53769e-05	4.32692	PREDICTED: uncharacterized protein LOC101497792 isoform X1 n_2 Tax_Cicer arietinum RepID_UPI00032A7D92			#N/A	#N/A
Ca09030	Ca1	23083270	23087360	-0.494939	5.02656	-5.92781	4.54583e-06	3.65555e-05	3.84761	PREDICTED: aspartic proteinase-like isoform X1 n_2 Tax_Cicer arietinum RepID_UPI00032A864C	AT1G11910.1	aspartic proteinase A1	Medtr2g045420.1	fungal proteinase A%2C aspartic proteinase superfamily protein
Ca09041	Ca1	23293545	23300107	-2.20352	0.305163	-7.8682	5.13466e-08	1.36582e-06	8.3947	PREDICTED: CBL-interacting serine/threonine-protein kinase 1-like isoform X1 n_2 Tax_Cicer arietinum RepID_UPI00032A9BE7	AT3G17510.1	CBL-interacting protein	Medtr4g123940.2	CBL-interacting kinase
Ca09044	Ca1	23322987	23326147	-1.3311	4.28187	-6.44051	1.32948e-06	1.38141e-05	5.10943	Mitochondrial pyruvate dehydrogenase kinase isoform 3 n_6 Tax_Papilionoideae RepID_A8I367_PEA	AT3G06483.1	pyruvate dehydrogenase kinase	Medtr2g045490.6	pyruvate dehydrogenase (acetyl-transferring) kinase
Ca09067	Ca1	23719009	23725792	3.68587	2.84804	11.0959	8.68251e-11	2.28964e-08	14.8333	Subtilisin-like serine protease n_2 Tax_Papilionoideae RepID_A0A072V7Z5_MEDTR	AT5G44530.1	Subtilase family protein	Medtr2g046740.1	subtilisin-like serine protease
Ca09111	Ca1	24444882	24448116	1.37461	3.28485	6.78146	5.96944e-07	7.49611e-06	6.02341	PREDICTED: pentatricopeptide repeat-containing protein At2g37230 n_1 Tax_Cicer arietinum RepID_UPI00032A8EA3	AT2G37230.1	Tetratricopeptide repeat (TPR)-like	Medtr2g437460.1	pentatricopeptide (PPR) repeat protein
Ca09187	Ca1	25497095	25539592	-0.793006	3.95012	-5.54946	1.14595e-05	7.42365e-05	2.96577	PREDICTED: 187-kDa microtubule-associated protein AIR9 n_1 Tax_Cicer arietinum RepID_UPI00032AACB6	AT4G23160.1	cysteine-rich RLK (RECEPTOR-like	Medtr2g048210.1	outer arm dynein light chain 1
Ca09186	Ca1	25575697	25581813	2.38665	2.62689	5.89411	4.9333e-06	3.89746e-05	4.03852	Periodic tryptophan protein n_3 Tax_Papilionoideae RepID_A2Q5D0_MEDTR	AT1G15440.1	periodic tryptophan protein	Medtr7g076230.1	periodic tryptophan protein
Ca09192	Ca1	25737534	25741303	0.780228	4.5706	5.40381	1.64138e-05	9.97813e-05	2.5759	PREDICTED: probable serine/threonine-protein kinase kinX n_1 Tax_Cicer arietinum RepID_UPI00032A90A8	AT5G58130.1	RNA-binding (RRM/RBD/RNP motifs)	Medtr2g048340.1	RNA recognition motif%2C a.k.a. RRM%2C RBD protein
Ca09213	Ca1	25829545	25837257	1.60083	4.72602	11.4556	4.60688e-11	1.53179e-08	15.4348	PREDICTED: probable inositol transporter 2 isoform X1 n_2 Tax_Cicer arietinum RepID_UPI00032AAAD2	AT1G30220.1	inositol transporter 2	Medtr2g048720.1	inositol transporter 4
Ca09637	Ca1	26004037	26009343	1.28812	2.2412	6.80424	5.66145e-07	7.27052e-06	6.20025	PREDICTED: DNA-directed RNA polymerases I and III subunit RPAC1-like n_2 Tax_Cicer arietinum RepID_UPI00032A666F	AT1G60850.1	DNA-directed RNA polymerase	Medtr3g060690.1	DNA-directed RNA polymerase
Ca09203	Ca1	26123349	26133520	0.986152	0.827975	4.55619	0.00013625	0.000565367	1.04516	Endoplasmic oxidoreductin protein n_1 Tax_Medicago truncatula RepID_G7IGL6_MEDTR	AT4G23160.1	cysteine-rich RLK (RECEPTOR-like	Medtr3g093120.1	SPFH domain/band 7 family protein
Ca09641	Ca1	26183847	26185547	0.832535	5.75881	6.13194	2.77668e-06	2.47924e-05	4.34461	Uncharacterized protein n_10 Tax_rosids RepID_A0A0A0LXN1_CUCSA	AT4G18100.1	Ribosomal protein L32e	Medtr8g085740.1	60S ribosomal protein L32-1
Ca09636	Ca1	26434914	26439869	-0.89373	4.77249	-6.39324	1.48718e-06	1.51643e-05	4.97656	PREDICTED: phytochrome E isoform X1 n_2 Tax_Cicer arietinum RepID_UPI00032AB8E9	AT4G18130.1	phytochrome E	Medtr2g049520.1	phytochrome protein
Ca09239	Ca1	26744123	26746354	-1.97417	5.04502	-13.2652	2.32897e-12	3.23833e-09	18.4096	No Hits	AT2G34620.1	Mitochondrial transcription termination	Medtr2g049780.1	transcription termination factor family protein
Ca09275	Ca1	27442503	27449511	1.34033	4.30272	7.96899	4.12223e-08	1.18292e-06	8.61198	PREDICTED: DEAD-box ATP-dependent RNA helicase 51 n_1 Tax_Cicer arietinum RepID_UPI00032AD376	AT3G18600.1	P-loop containing nucleoside triphosphate	Medtr2g055850.1	DEAD-box ATP-dependent RNA helicase-like protein
Ca09290	Ca1	27722609	27728099	-1.30803	3.22156	-7.42037	1.38488e-07	2.72259e-06	7.46869	PREDICTED: translation initiation factor eIF-2B subunit delta-like isoform X1 n_3 Tax_Cicer arietinum RepID_UPI00064129F1	AT5G38640.1	NagB/RpiA/CoA transferase-like superfamily	Medtr2g055750.5	translation initiation factor eIF-2B delta subunit
Ca09313	Ca1	28400475	28401947	-1.46067	3.93137	-7.76325	6.46338e-08	1.56916e-06	8.17913	Myb/SANT-like DNA-binding domain protein n_1 Tax_Medicago truncatula RepID_A0A072U248_MEDTR			Medtr7g094990.1	Myb/SANT-like DNA-binding domain protein
Ca09363	Ca1	29367196	29370878	1.71504	3.80262	11.7812	2.62757e-11	1.07578e-08	16.0123	PREDICTED: actin-related protein 6 n_1 Tax_Cicer arietinum RepID_UPI00032AAEF2	AT3G33520.1	actin-related	Medtr2g445210.2	actin-related protein ARP4
Ca09388	Ca1	30079192	30095158	1.38155	2.50863	6.7266	6.78382e-07	8.22176e-06	5.97926	PREDICTED: truncated transcription factor CAULIFLOWER A-like n_1 Tax_Cicer arietinum RepID_UPI00032A89AD	AT4G23160.1	cysteine-rich RLK (RECEPTOR-like	Medtr2g461710.1	MADS-box transcription factor family protein
Ca09395	Ca1	30321652	30326607	0.921431	1.66835	5.56372	1.10643e-05	7.2135e-05	3.3436	PREDICTED: squamosa promoter-binding-like protein 17 n_1 Tax_Cicer arietinum RepID_UPI00032ACB3E	AT1G69170.1	Squamosa promoter-binding protein-like	Medtr2g461920.1	LIGULELESS 1 protein%2C putative
Ca09397	Ca1	30346856	30349560	3.59091	3.1101	8.65766	9.531e-09	4.44441e-07	10.2137	Alpha-1 -4-glucan-protein synthase [UDP-forming]-like protein n_2 Tax_Papilionoideae RepID_A0A072V8I1_MEDTR	AT3G02230.1	reversibly glycosylated	Medtr2g461970.1	alpha-1%2C4-glucan-protein synthase [UDP-forming]-like protein
Ca09441	Ca1	31033449	31038503	0.549227	6.41475	5.8681	5.25513e-06	4.09253e-05	3.70649	PREDICTED: uncharacterized protein LOC101501423 n_1 Tax_Cicer arietinum RepID_UPI00032ACCF3	AT2G12400.1	unknown protein; FUNCTIONS IN: molecular_function	Medtr2g450550.2	transmembrane protein%2C putative
Ca09442	Ca1	31071652	31084966	-0.647068	5.70409	-7.6667	7.99769e-08	1.83121e-06	7.91864	PREDICTED: uncharacterized methyltransferase At2g41040 - chloroplastic n_1 Tax_Cicer arietinum RepID_UPI00032A7C72	ATMG00860.1	DNA/RNA polymerases superfamily	Medtr1478s0010.1	hypothetical protein
Ca09470	Ca1	31464571	31471695	0.463	5.57318	4.97062	4.821e-05	0.000240265	1.48366	Proteasome subunit alpha type-6 n_58 Tax_Mesangiospermae RepID_PSA6_SOYBN	AT2G05840.1	20S proteasome subunit PAA2	Medtr2g060830.1	proteasome subunit alpha type-6-A protein
Ca09540	Ca1	32705658	32709393	0.42375	5.16706	5.5969	1.01978e-05	6.78153e-05	3.03672	Nodulin-like/MFS transporter n_2 Tax_Papilionoideae RepID_A0A072V983_MEDTR	AT1G80530.1	Major facilitator superfamily protein	Medtr2g450710.1	nodulin-like/MFS transporter
Ca09552	Ca1	32861513	32865060	-0.819236	2.64101	-5.33022	1.96937e-05	0.000115986	2.59605	PREDICTED: origin of replication complex subunit 3 n_1 Tax_Cicer arietinum RepID_UPI00032A5B42			Medtr5g082610.1	origin recognition complex subunit 3
Ca09549	Ca1	32878800	32884338	-0.853867	4.39038	-6.34576	1.66488e-06	1.66162e-05	4.87373	PREDICTED: origin of replication complex subunit 3 n_1 Tax_Cicer arietinum RepID_UPI00032A5B42	AT5G16690.1	origin recognition complex	Medtr5g082610.1	origin recognition complex subunit 3
Ca09563	Ca1	33053234	33063653	-1.20056	4.77244	-9.86453	8.50059e-10	9.35371e-08	12.5037	PREDICTED: CBL-interacting serine/threonine-protein kinase 23 n_1 Tax_Cicer arietinum RepID_UPI00032A60A2	AT1G30270.1	CBL-interacting	Medtr2g049790.1	CBL-interacting kinase
Ca09608	Ca1	33624983	33627338	1.72649	3.4971	8.03259	3.59126e-08	1.10743e-06	8.8218	Ribosomal protein L7Ae/L30e/S12e/Gadd45 family protein n_1 Tax_Arabidopsis thaliana RepID_F4JRD3_ARATH	AT5G20160.3	Ribosomal protein L7Ae/L30e/S12e/Gadd45	Medtr0011s0330.1	ribosomal protein L7Ae/L30e/S12e/Gadd45 family protein
Ca09605	Ca1	33682348	33683541	-1.11095	5.88427	-7.01343	3.4908e-07	5.15176e-06	6.43332	PREDICTED: uncharacterized protein LOC101505062 isoform X1 n_1 Tax_Cicer arietinum RepID_UPI00032AA491	AT1G79510.2	Uncharacterized conserved protein (DUF2358)	Medtr2g064370.1	plant/F3O9-12 protein
Ca09621	Ca1	33866014	33869602	-1.58146	1.84027	-5.85827	5.38234e-06	4.15562e-05	4.03129	Plant/T8K14-16 protein n_10 Tax_Papilionoideae RepID_A0A072U8X6_MEDTR	AT1G79420.1	Protein of unknown function (DUF620)	Medtr6g445110.1	plant/T8K14-16 protein
Ca09655	Ca1	34153764	34157070	-0.944906	6.54029	-6.84912	5.10108e-07	6.77266e-06	6.05277	PREDICTED: metal tolerance protein 10-like n_1 Tax_Cicer arietinum RepID_UPI00032AC2B5	AT1G16310.1	Cation efflux family protein	Medtr2g064405.1	cation diffusion facilitator family transporter
Ca09735	Ca1	35653139	35659445	-0.617818	7.06101	-7.45567	1.27946e-07	2.5648e-06	7.44642	PREDICTED: ABC transporter D family member 2 - chloroplastic isoform X2 n_1 Tax_Cicer arietinum RepID_UPI000640C697	AT1G54350.1	ABC transporter family protein	Medtr2g062790.1	ABC transporter D family protein
Ca09791	Ca1	36569377	36590348	-1.00921	2.39372	-5.48703	1.33646e-05	8.42937e-05	3.02522	PREDICTED: putative callose synthase 8 n_1 Tax_Cicer arietinum RepID_UPI0006416D03	AT4G23160.1	cysteine-rich RLK (RECEPTOR-like	Medtr2g072160.1	callose synthase-like protein
Ca09851	Ca1	36691795	36854106	0.686321	6.06179	4.78621	7.64961e-05	0.000351988	1.02654	PREDICTED: cytochrome P450 CYP72A219-like n_1 Tax_Cicer arietinum RepID_UPI00032A94C7	AT3G14610.1	cytochrome P450, family 72,	Medtr2g072250.1	cytochrome P450 family 709 protein
Ca09852	Ca1	36854107	36864179	-0.5795	6.6974	-4.90376	5.69857e-05	0.000276785	1.32205	PREDICTED: cytochrome P450 CYP72A219-like isoform X1 n_2 Tax_Cicer arietinum RepID_UPI00032ABC23	AT3G14610.1	cytochrome P450, family 72,	Medtr2g072310.1	cytochrome P450 family protein
Ca09810	Ca1	37110084	37115096	-0.880949	4.6921	-9.07433	4.0509e-09	2.60259e-07	10.9317	Mitogen-activated protein kinase n_7 Tax_Papilionoideae RepID_Q9XF36_MEDSA	AT1G53510.1	mitogen-activated protein	Medtr2g072840.2	MAP kinase-like protein
Ca09816	Ca1	37239349	37248034	1.08719	5.24825	6.8525	5.06129e-07	6.73151e-06	6.05803	PREDICTED: ubiquitin carboxyl-terminal hydrolase 25 n_1 Tax_Cicer arietinum RepID_UPI00032ABB35	AT3G14400.1	ubiquitin-specific protease 25	Medtr2g070390.1	ubiquitin carboxyl-terminal hydrolase
Ca09847	Ca1	37634516	37643151	-0.825127	6.67463	-9.337	2.38961e-09	1.92592e-07	11.463	Probable bifunctional methylthioribulose-1-phosphate dehydratase/enolase-phosphatase E1 n_3 Tax_Papilionoideae RepID_I3SWS0_MEDTR	AT5G53850.2	haloacid dehalogenase-like hydrolase	Medtr2g079110.1	methylthioribulose-1-phosphate dehydratase
Ca09845	Ca1	37655263	37658062	1.4215	2.58182	4.67734	0.000100516	0.000439883	1.01178	PREDICTED: proline-rich extensin-like protein EPR1 n_1 Tax_Cicer arietinum RepID_UPI00032A801D	AT4G27520.1	early nodulin-like	Medtr2g079030.1	MATE subfamily protein
Ca09868	Ca1	37738681	37742246	-0.922293	5.82859	-6.3904	1.49726e-06	1.52366e-05	4.96605	Protein phosphatase 2C-like protein n_4 Tax_Papilionoideae RepID_A0A072VB67_MEDTR	AT3G15260.2	Protein phosphatase 2C family protein	Medtr8g463130.2	phosphatase 2C family protein
Ca09870	Ca1	37753958	37756486	0.561405	3.07509	5.71167	7.69651e-06	5.46763e-05	3.46983	Serine/Threonine-kinase WNK (WNK)-like protein n_3 Tax_Papilionoideae RepID_A0A072VKL1_MEDTR	AT5G53900.1	Serine/threonine-protein kinase WNK	Medtr2g078750.2	Serine/Threonine-kinase WNK (WNK)-like protein
Ca09867	Ca1	37772317	37785714	-0.474458	4.55321	-4.97554	4.76213e-05	0.000237795	1.50594	MAP kinase n_5 Tax_Papilionoideae RepID_A0A072V9F9_MEDTR	AT4G23160.1	cysteine-rich RLK (RECEPTOR-like	Medtr3g093120.1	SPFH domain/band 7 family protein
Ca09890	Ca1	38026326	38031525	1.92231	3.64857	8.79067	7.23526e-09	3.73862e-07	10.4059	Glyceraldehyde-3-phosphate dehydrogenase n_4 Tax_Papilionoideae RepID_G7IQT1_MEDTR	AT1G79530.1	glyceraldehyde-3-phosphate dehydrogenase	Medtr2g065470.3	glyceraldehyde-3-phosphate dehydrogenase
Ca09878	Ca1	38130070	38133744	0.68363	8.46864	4.78885	7.59913e-05	0.000350403	1.00708	Phosphoglycerate kinase n_2 Tax_Papilionoideae RepID_G7IT87_MEDTR	AT3G12780.1	phosphoglycerate kinase 1	Medtr2g066120.1	phosphoglycerate kinase-like protein
Ca09893	Ca1	38298230	38304720	-1.08676	6.34965	-5.98437	3.96373e-06	3.28059e-05	3.98976	PREDICTED: uncharacterized protein LOC101511072 n_1 Tax_Cicer arietinum RepID_UPI00032AA737	AT1G79570.1	Protein kinase superfamily protein	Medtr8g442400.1	octicosapeptide/phox/Bem1p domain kinase superfamily protein
Ca09891	Ca1	38331864	38337682	-0.623758	3.6376	-5.98561	3.95185e-06	3.2743e-05	4.06039	PREDICTED: protein CHROMOSOME TRANSMISSION FIDELITY 7-like n_1 Tax_Cicer arietinum RepID_UPI00032AB433	AT4G31400.1	damaged DNA binding;DNA-directed	Medtr0036s0040.1	N-acetyltransferase ESCO2-like protein
Ca09897	Ca1	38399177	38409227	-1.13102	1.11857	-5.58196	1.0579e-05	6.96541e-05	3.45771	Aspartic protease n_2 Tax_Cicer arietinum RepID_A0A0A7TYZ4_CICAR	AT5G33340.1	Eukaryotic aspartyl protease family	Medtr0036s0110.1	eukaryotic aspartyl protease family protein
Ca09933	Ca1	38466564	38569469	-0.916314	7.32686	-9.67746	1.2215e-09	1.24552e-07	12.1362	Sulfurtransferase n_2 Tax_Papilionoideae RepID_G8A093_MEDTR	AT3G01660.1	S-adenosyl-L-methionine-dependent methyltransferases	Medtr7g032900.1	methyltransferase type 11
Ca09932	Ca1	38583934	38588303	1.55726	2.83839	7.33179	1.69048e-07	3.09282e-06	7.32877	PREDICTED: GATA zinc finger domain-containing protein 14 n_1 Tax_Cicer arietinum RepID_UPI00032AA2C1	AT5G18440.2	FUNCTIONS IN: molecular_function unknown;	Medtr2g067220.2	nuclear fragile X mental retardation-interacting protein
Ca09910	Ca1	38711732	38713597	-0.860287	3.17739	-7.03592	3.31502e-07	4.94416e-06	6.5968	PREDICTED: uncharacterized protein LOC101489878 n_1 Tax_Cicer arietinum RepID_UPI00032A5316	AT1G79160.1	unknown protein; BEST Arabidopsis thaliana	Medtr2g066700.1	YUP8H12R.23 protein%2C putative
Ca09928	Ca1	39147640	39149838	-2.06253	0.844388	-5.12357	3.29121e-05	0.00017578	2.40979	PREDICTED: feruloyl CoA ortho-hydroxylase 1 n_1 Tax_Cicer arietinum RepID_UPI00032A8ED5	AT3G12900.1	2-oxoglutarate (2OG) and Fe(II)-dependent	Medtr2g068850.1	leucoanthocyanidin dioxygenase%2C putative
Ca09947	Ca1	39227589	39231235	0.721171	8.86663	6.05302	3.3579e-06	2.87615e-05	4.11667	Elongation factor 2 n_201 Tax_Spermatophyta RepID_EF2_ARATH	AT1G56070.1	Ribosomal protein S5/Elongation	Medtr2g069310.1	translation elongation factor EF-2 subunit
Ca09945	Ca1	39238901	39268403	0.830318	8.83189	6.77937	5.99865e-07	7.50199e-06	5.85362	Elongation factor 2 n_201 Tax_Spermatophyta RepID_EF2_ARATH	AT1G56070.1	Ribosomal protein S5/Elongation	Medtr2g069310.1	translation elongation factor EF-2 subunit
Ca09939	Ca1	39300296	39301815	-0.762175	4.5314	-5.79007	6.35505e-06	4.73571e-05	3.52429	PREDICTED: probable BOI-related E3 ubiquitin-protein ligase 3 n_1 Tax_Cicer arietinum RepID_UPI00032ACAE3	AT3G12920.1	SBP (S-ribonuclease binding protein)	Medtr2g069350.1	SBP (S-ribonuclease-binding protein) family protein%2C putative
Ca09934	Ca1	39356773	39360310	0.523815	4.84912	5.021	4.25084e-05	0.000216434	1.61495	PREDICTED: protein Iojap - chloroplastic isoform X1 n_1 Tax_Cicer arietinum RepID_UPI00032AA743	AT3G12930.1	Lojap-related protein	Medtr2g069470.1	ribosome silencing factor
Ca09941	Ca1	39379242	39385673	0.624477	3.77656	5.43985	1.50153e-05	9.29042e-05	2.71484	RNA recognition motif n_2 Tax_Papilionoideae RepID_G7IJA2_MEDTR	AT1G16610.1	arginine/serine-rich 45	#N/A	#N/A
Ca09962	Ca1	39531977	39535801	0.958057	4.09991	9.15823	3.41915e-09	2.36633e-07	11.1264	PREDICTED: pentatricopeptide repeat-containing protein At1g20230-like - partial n_1 Tax_Cicer arietinum RepID_UPI00032A8837	AT1G20230.1	Pentatricopeptide repeat (PPR) superfamily	Medtr7g076350.1	pentatricopeptide (PPR) repeat protein
Ca09981	Ca1	39689925	39696179	-0.761801	5.48603	-4.93117	5.32081e-05	0.000261006	1.3845	FAD/NAD(P)-binding oxidoreductase family protein n_3 Tax_Papilionoideae RepID_G7IGY9_MEDTR	AT1G55980.1	FAD/NAD(P)-binding oxidoreductase family	Medtr2g064620.1	FAD/NAD(P)-binding oxidoreductase family protein
Ca10012	Ca1	40389725	40393893	0.891364	7.36356	6.7521	6.39207e-07	7.85275e-06	5.82158	Putative uncharacterized protein n_2 Tax_Vitis vinifera RepID_D7TCM7_VITVI	AT1G72730.1	DEA(D/H)-box RNA helicase family protein	Medtr2g039960.1	DEAD-box ATP-dependent RNA helicase
Ca10010	Ca1	40426088	40432821	-0.802195	7.2863	-8.01968	3.69299e-08	1.12295e-06	8.69867	PREDICTED: lycopene epsilon cyclase - chloroplastic n_1 Tax_Cicer arietinum RepID_UPI00032AA629	AT5G57030.1	Lycopene beta/epsilon cyclase protein	Medtr2g040060.1	lycopene epsilon cyclase
Ca10020	Ca1	40493981	40499604	-0.597832	3.01693	-4.91367	5.55906e-05	0.000271388	1.50333	PREDICTED: uncharacterized zinc finger CCHC domain-containing protein At4g19190 n_1 Tax_Cicer arietinum RepID_UPI00032A7AB3	AT4G19190.1	zinc knuckle (CCHC-type) family protein	Medtr2g040410.1	zinc knuckle (CCHC-type) family protein
Ca10013	Ca1	40545989	40549161	-1.19105	5.59134	-6.78862	5.87088e-07	7.42108e-06	5.90754	PREDICTED: probable protein phosphatase 2C 53 n_1 Tax_Cicer arietinum RepID_UPI00032AC94A	AT1G72770.3	homology to ABI1	Medtr2g040500.1	protein phosphatase 2C ABI2-like protein
Ca10032	Ca1	40718734	40722235	-0.594673	3.40674	-5.38821	1.70594e-05	0.000102766	2.62344	Uncharacterized protein n_1 Tax_Lotus japonicus RepID_I3SFU1_LOTJA	AT2G06530.1	SNF7 family protein	Medtr2g041190.1	charged multivesicular body protein
Ca10033	Ca1	40759816	40765747	-1.36005	6.5148	-7.97435	4.07449e-08	1.1813e-06	8.60244	PREDICTED: protein FAR1-RELATED SEQUENCE 6-like n_1 Tax_Cicer arietinum RepID_UPI00032ACF5E			Medtr7g056020.1	F-box/RNI/FBD-like domain protein
Ca10051	Ca1	40993284	40996285	-1.06146	4.75833	-5.05769	3.87879e-05	0.000200629	1.70531	PREDICTED: uncharacterized protein LOC101494247 isoform X1 n_2 Tax_Cicer arietinum RepID_UPI00032AD3DF	AT2G06025.1	Acyl-CoA N-acyltransferases (NAT) superfamily	Medtr2g041620.4	acyl-CoA N-acyltransferase (NAT) superfamily protein
Ca10104	Ca1	42176184	42178328	-0.911409	6.15067	-5.64408	9.08254e-06	6.20999e-05	3.15687	PREDICTED: peptidyl-prolyl cis-trans isomerase CYP28 - chloroplastic n_1 Tax_Cicer arietinum RepID_UPI00032A78C8	AT5G35100.1	Cyclophilin-like peptidyl-prolyl cis-trans	Medtr2g461260.1	peptidyl-prolyl cis-trans isomerase
Ca10116	Ca1	42351960	42352738	-1.47885	1.13996	-6.50269	1.14763e-06	1.24225e-05	5.60063	No Hits			#N/A	#N/A
Ca10118	Ca1	42352827	42354214	-1.35041	1.3101	-6.88755	4.66662e-07	6.35404e-06	6.46333	No Hits			#N/A	#N/A
Ca10137	Ca1	42751770	42762243	8.05882	1.0061	6.71817	6.91863e-07	8.31573e-06	5.86567	PREDICTED: probable flavin-containing monooxygenase 1 n_1 Tax_Cicer arietinum RepID_UPI00032A780D	AT4G23160.1	cysteine-rich RLK (RECEPTOR-like	Medtr2g450310.1	flavin-binding monooxygenase-like protein
Ca10177	Ca1	43329667	43335468	0.967299	5.31813	8.15594	2.75278e-08	9.27395e-07	8.99481	PREDICTED: 1-acyl-sn-glycerol-3-phosphate acyltransferase 1 - chloroplastic n_1 Tax_Cicer arietinum RepID_UPI00032A5678	AT4G30580.1	Phospholipid/glycerol	Medtr5g043620.1	1-acyl-sn-glycerol-3-phosphate acyltransferase
Ca10198	Ca1	43606449	43609574	-0.972209	7.24748	-7.42635	1.36642e-07	2.69322e-06	7.37872	Lectin-like protein n_1 Tax_Cicer arietinum RepID_Q9M444_CICAR	AT1G10155.1	phloem protein 2-A10	Medtr0026s0010.1	phloem protein
Ca10201	Ca1	43636310	43663014	-0.836006	6.12527	-5.93013	4.52031e-06	3.64461e-05	3.85697	PREDICTED: phosphatase IMPL1 - chloroplastic n_1 Tax_Cicer arietinum RepID_UPI00032A7606	AT4G23160.1	cysteine-rich RLK (RECEPTOR-like	Medtr4g119880.1	xyloglucan xylosyltransferase
Ca10224	Ca1	43888535	43890992	-0.618087	3.68808	-4.97401	4.78032e-05	0.000238392	1.56421	Acyl-protein thioesterase 2 n_4 Tax_Soja RepID_A0A0B2PA86_GLYSO			Medtr5g048690.1	hypothetical protein
Ca10236	Ca1	44296428	44308261	0.774334	5.44694	5.25429	2.37758e-05	0.000135387	2.18943	PREDICTED: FIP1[V]-like protein n_1 Tax_Cicer arietinum RepID_UPI00032ACD9C	AT5G58040.1	homolog	Medtr2g450210.1	Fip1 [V]-like protein
Ca10288	Ca1	44854754	44856682	-1.50279	0.879904	-6.05125	3.37222e-06	2.8863e-05	4.57446	Photosystem I assembly protein Ycf3 n_1 Tax_Campanula takesimana RepID_A0A0U1YGQ6_9ASTR	ATCG00360.1	Tetratricopeptide repeat (TPR)-like	Medtr4g051210.1	photosystem I assembly protein Ycf3
Ca10321	Ca1	45884627	45892640	0.710734	5.29528	7.99332	3.91017e-08	1.15156e-06	8.64031	Serine/Threonine kinase receptor-associated-like protein n_3 Tax_Papilionoideae RepID_A0A072V826_MEDTR	AT3G15610.1	Transducin/WD40 repeat-like superfamily	Medtr2g054920.1	Serine/Threonine kinase receptor-associated-like protein
Ca10326	Ca1	45986165	46024502	1.41201	3.69382	5.25054	2.39978e-05	0.000136449	2.28424	Nuclear pore complex Nup205-like protein n_3 Tax_Papilionoideae RepID_G7L0K5_MEDTR	AT5G51200.1	Protein of unknown function (DUF3414)	Medtr7g099880.1	nuclear pore complex Nup205-like protein
Ca10337	Ca1	46374014	46376680	-0.590836	3.92431	-5.0062	4.41095e-05	0.000223396	1.62344	PREDICTED: pentatricopeptide repeat-containing protein At5g55740 - chloroplastic n_1 Tax_Cicer arietinum RepID_UPI00032AA865	AT5G55740.1	Tetratricopeptide repeat (TPR)-like	Medtr8g066670.1	chlororespiratory reduction protein%2C putative
Ca10346	Ca1	46557902	46559818	-0.543041	4.3777	-5.02787	4.17858e-05	0.000213679	1.64549	UDP-glycosyltransferase n_1 Tax_Cicer arietinum RepID_A0A067XU13_CICAR	AT1G73880.1	UDP-glucosyl transferase 89B1	Medtr2g059240.1	UDP-glucosyltransferase family protein
Ca10342	Ca1	46603238	46607692	-0.630609	3.85875	-5.62496	9.51875e-06	6.46776e-05	3.1592	PREDICTED: pentatricopeptide repeat-containing protein At1g18485 n_1 Tax_Cicer arietinum RepID_UPI00032AA4EF	AT1G18485.1	Pentatricopeptide repeat (PPR) superfamily	Medtr2g058990.1	pentatricopeptide (PPR) repeat protein
Ca10355	Ca1	47058266	47077260	-0.517024	7.96505	-5.3603	1.82794e-05	0.000109042	2.44447	PREDICTED: adenylate kinase 5 - chloroplastic n_1 Tax_Cicer arietinum RepID_UPI00032AAFE8	AT4G23160.1	cysteine-rich RLK (RECEPTOR-like	Medtr3g093120.1	SPFH domain/band 7 family protein
Ca10375	Ca1	47318275	47335969	-0.674012	7.79859	-5.25655	2.36426e-05	0.000134816	2.19011	PREDICTED: uncharacterized protein LOC101503998 isoform X1 n_2 Tax_Cicer arietinum RepID_UPI00032A6FAE	AT4G23160.1	cysteine-rich RLK (RECEPTOR-like	Medtr5g024100.1	PPR containing plant-like protein
Ca10384	Ca1	47513724	47515814	0.948691	6.04213	6.36048	1.60758e-06	1.61657e-05	4.89553	Putative uncharacterized protein n_3 Tax_rosids RepID_F6H2K4_VITVI	AT1G78570.1	rhamnose biosynthesis	Medtr2g073240.1	rhamnose biosynthetic-like enzyme
Ca10393	Ca1	47591928	47595869	-0.654915	4.25735	-6.27573	1.96743e-06	1.889e-05	4.7128	PREDICTED: uncharacterized protein LOC101511922 n_1 Tax_Cicer arietinum RepID_UPI00032AAEAC	AT1G78620.1	Protein of unknown function DUF92,	Medtr2g073380.1	integral membrane family protein
Ca10396	Ca1	47644599	47646736	1.5505	1.90718	9.04788	4.27413e-09	2.70136e-07	11.0123	PREDICTED: protein trichome birefringence-like 42 n_1 Tax_Cicer arietinum RepID_UPI00032A788F	AT1G78710.1	TRICHOME BIREFRINGENCE-LIKE 42	Medtr2g073500.1	Pmr5/Cas1p GDSL/SGNH-like acyl-esterase family protein
Ca10417	Ca1	47847747	47850642	1.8777	2.06384	8.36317	1.76911e-08	6.78195e-07	9.63236	PREDICTED: uncharacterized protein LOC101489138 n_2 Tax_Cicer arietinum RepID_UPI00032AC90E			Medtr2g075470.2	plant/T3F20-21 protein%2C putative
Ca10425	Ca1	47975432	47979623	-1.09196	2.76923	-7.15341	2.5337e-07	4.05638e-06	6.9152	PREDICTED: ubiquitin domain-containing protein 2 n_1 Tax_Cicer arietinum RepID_UPI00032A58B3	AT1G53400.1	Ubiquitin domain-containing protein	Medtr2g075840.1	ubiquitin domain protein
Ca10448	Ca1	48302609	48304776	-1.12745	3.33099	-6.06451	3.26613e-06	2.82394e-05	4.28684	PREDICTED: GEM-like protein 2 n_1 Tax_Cicer arietinum RepID_UPI00032A9A7C	AT4G01600.2	GRAM domain family protein	Medtr2g076350.1	PH-GRAM-GEM domain protein
Ca10455	Ca1	48393180	48399692	0.510174	3.45377	5.58458	1.05113e-05	6.93149e-05	3.10527	Alpha-1 -2-mannosyltransferase Alg9 n_2 Tax_Papilionoideae RepID_G7IH72_MEDTR	AT1G16900.1	Alg9-like mannosyltransferase family	Medtr2g076680.1	alpha-1%2C2-mannosyltransferase Alg9
Ca10458	Ca1	48443899	48447813	1.02282	5.39236	5.61409	9.77621e-06	6.59581e-05	3.07962	PREDICTED: TPR repeat-containing thioredoxin TTL1 n_1 Tax_Cicer arietinum RepID_UPI00032ABE43	AT1G53300.1	tetratricopetide-repeat thioredoxin-like	Medtr2g078020.1	TPR repeat thioredoxin TTL1-like protein
Ca10461	Ca1	48525489	48528520	2.61171	5.45936	9.02177	4.50691e-09	2.79082e-07	10.8291	Nucleolar GTP-binding protein 1 n_10 Tax_Papilionoideae RepID_V7AEK0_PHAVU	AT1G50920.1	Nucleolar GTP-binding protein	Medtr8g018150.1	nucleolar GTP-binding-like protein
Ca10462	Ca1	48530164	48534595	-0.484575	7.97581	-6.2395	2.14534e-06	2.02425e-05	4.59519	PREDICTED: protein DJ-1 homolog B n_1 Tax_Cicer arietinum RepID_UPI00032A7209	AT1G53280.1	Class I glutamine amidotransferase-like	Medtr2g078060.1	class I glutamine amidotransferase superfamily protein
Ca10460	Ca1	48547265	48550470	1.36053	5.92408	9.23751	2.91537e-09	2.13472e-07	11.2611	PREDICTED: multiple organellar RNA editing factor 8 - chloroplastic/mitochondrial n_1 Tax_Cicer arietinum RepID_UPI00032A7474	AT3G15000.1	cobalt ion binding	Medtr2g078090.1	plastid developmental protein DAG
Ca10474	Ca1	48627532	48630237	-1.30842	3.93848	-5.10122	3.47973e-05	0.000184161	1.85987	PREDICTED: protein IQ-DOMAIN 1 isoform X1 n_2 Tax_Cicer arietinum RepID_UPI0006418402	AT3G15050.1	IQ-domain 10	Medtr2g078210.6	calmodulin-binding protein
Ca10470	Ca1	48642176	48645287	-1.52869	3.64403	-7.43644	1.33583e-07	2.64314e-06	7.4652	PREDICTED: uncharacterized protein LOC101504963 isoform X1 n_2 Tax_Cicer arietinum RepID_UPI00032AC30E			Medtr2g078220.1	hypothetical protein
Ca10481	Ca1	48690155	48695604	0.892328	6.09258	7.89948	4.7957e-08	1.29138e-06	8.43654	Proliferation-associated 2G4-like protein n_4 Tax_Papilionoideae RepID_A0A072V9Z9_MEDTR	AT3G51800.2	metallopeptidase	Medtr2g078290.1	proliferation-associated 2G4-like protein
Ca10476	Ca1	48760217	48769577	1.43915	1.13829	4.85093	6.50436e-05	0.000308234	1.7186	Putative uncharacterized protein (Fragment) n_3 Tax_Cicer arietinum RepID_Q9LEN6_CICAR			Medtr2g078390.2	hypothetical protein
Ca10497	Ca1	48824635	48828121	-0.719143	4.34112	-4.84152	6.65957e-05	0.000313796	1.18249	PREDICTED: RNA exonuclease 4 n_1 Tax_Cicer arietinum RepID_UPI00032AC2C8	AT3G15080.1	Polynucleotidyl transferase, ribonuclease	Medtr2g078510.1	RNA exonuclease-like protein
Ca28683	Ca2	97407	103050	-0.559066	6.3362	-4.8483	6.54737e-05	0.000309463	1.18354	PREDICTED: protein TWIN LOV 1 isoform X1 n_2 Tax_Cicer arietinum RepID_UPI00032AC64E	AT2G02710.3	PAS/LOV protein B	Medtr5g038420.5	TWIN LOV protein
Ca28675	Ca2	147240	153339	-0.617438	3.95787	-5.95434	4.26264e-06	3.49582e-05	3.95591	PREDICTED: alpha-amylase 3 - chloroplastic isoform X1 n_2 Tax_Cicer arietinum RepID_UPI00032A6F84	AT1G69830.1	alpha-amylase-like 3	Medtr8g468990.3	alpha amylase domain protein
Ca28672	Ca2	164851	167339	-1.06724	0.589074	-5.43189	1.53131e-05	9.44794e-05	3.14369	PREDICTED: pectate lyase n_1 Tax_Cicer arietinum RepID_UPI00032A9321	AT1G14420.1	Pectate lyase family protein	Medtr5g038510.1	pectate lyase P59-like protein
Ca28678	Ca2	183711	187062	-0.825527	5.55578	-6.46048	1.26808e-06	1.33576e-05	5.13142	PREDICTED: single-stranded DNA-binding protein WHY1 - chloroplastic-like isoform X1 n_2 Tax_Cicer arietinum RepID_UPI00032A5720			#N/A	#N/A
Ca28694	Ca2	192639	195610	1.30232	0.832492	4.54082	0.00014161	0.000583337	1.0212	PREDICTED: pentatricopeptide repeat-containing protein At2g02750-like n_2 Tax_Cicer arietinum RepID_UPI00064141D4	AT2G02750.1	Pentatricopeptide repeat (PPR) superfamily	Medtr5g038580.1	PPR containing plant-like protein
Ca28710	Ca2	563957	564523	-1.88145	3.1295	-7.28109	1.89576e-07	3.33941e-06	7.17694	PREDICTED: uncharacterized protein LOC101512365 n_1 Tax_Cicer arietinum RepID_UPI00032A5AAA			#N/A	#N/A
Ca28718	Ca2	642187	643464	-0.689468	3.89308	-6.71925	6.90118e-07	8.3113e-06	5.79096	PREDICTED: transcription factor TCP14-like isoform X1 n_1 Tax_Cicer arietinum RepID_UPI00032A7802	AT1G69690.1	TCP family transcription factor	Medtr5g039600.1	TCP family transcription factor
Ca28737	Ca2	807535	811095	-0.892553	2.90917	-6.43479	1.34761e-06	1.39595e-05	5.22888	PREDICTED: haloacid dehalogenase-like hydrolase domain-containing protein 3 isoform X1 n_2 Tax_Cicer arietinum RepID_UPI0006414CEC			Medtr5g040090.1	haloacid dehalogenase-like hydrolase domain protein
Ca28736	Ca2	867821	872215	0.704753	5.93507	6.66898	7.76208e-07	9.08347e-06	5.62839	Methyltransferase PMT2-like protein n_2 Tax_Papilionoideae RepID_G7KDX8_MEDTR	AT1G26850.2	S-adenosyl-L-methionine-dependent methyltransferases	Medtr5g040360.1	methyltransferase PMT2-like protein
Ca28750	Ca2	985584	992149	1.70831	5.08559	7.17048	2.43704e-07	3.94578e-06	6.79875	PREDICTED: probable apyrase 6 n_1 Tax_Cicer arietinum RepID_UPI00032A7FF4	AT1G14250.1	GDA1/CD39 nucleoside phosphatase family	Medtr5g040710.1	GDA1/CD39 nucleoside phosphatase family protein
Ca28761	Ca2	1163786	1164511	-1.21752	4.35993	-7.11436	2.7699e-07	4.30108e-06	6.68427	PREDICTED: E3 ubiquitin-protein ligase RNF167-like n_1 Tax_Cicer arietinum RepID_UPI00032A7038	AT1G26800.1	RING/U-box superfamily protein	Medtr5g041310.1	zinc finger%2C C3HC4 type (RING finger) protein
Ca28780	Ca2	1308111	1310258	1.40168	7.35079	6.37806	1.54179e-06	1.55964e-05	4.93446	Alpha-expansin 3 n_6 Tax_Papilionoideae RepID_Q8L5G5_CICAR	AT1G69530.2		Medtr5g041700.1	expansin A10
Ca28779	Ca2	1382607	1385830	0.858915	3.94272	5.11109	3.39518e-05	0.00018031	1.89647	PREDICTED: methyltransferase-like protein 7A n_1 Tax_Cicer arietinum RepID_UPI00032A51FD	AT1G69523.1	S-adenosyl-L-methionine-dependent methyltransferases	Medtr5g041780.1	methyltransferase-like protein
Ca28790	Ca2	1409077	1411111	-0.766197	7.21964	-5.07508	3.7141e-05	0.000194114	1.74532	PREDICTED: photosynthetic NDH subunit of lumenal location 2 - chloroplastic n_1 Tax_Cicer arietinum RepID_UPI0006418072	AT1G14150.2	PsbQ-like 2	Medtr5g041910.1	oxygen-evolving enhancer protein
Ca28789	Ca2	1422925	1424692	-0.857546	1.21421	-4.61195	0.000118448	0.000504221	1.11051	NAC family transcription factor 3 n_1 Tax_Cicer arietinum RepID_D0PWB2_CICAR	AT1G69490.1	NAC-like, activated	Medtr5g041940.1	NAC transcription factor-like protein
Ca28796	Ca2	1499355	1500815	-0.837292	4.42631	-8.69256	8.86417e-09	4.27752e-07	10.1515	PREDICTED: uncharacterized protein LOC101507654 n_1 Tax_Cicer arietinum RepID_UPI00032A8185	AT1G26761.1	Arabinanase/levansucrase/invertase	Medtr5g042100.1	arabinanase/levansucrase/invertase%2C putative
Ca28842	Ca2	2004957	2010441	-1.01993	2.5645	-7.86462	5.17504e-08	1.37179e-06	8.5218	Uncharacterized protein n_11 Tax_Papilionoideae RepID_I1JE95_SOYBN	AT1G26640.1	Amino acid kinase family protein	Medtr5g042980.2	amino acid kinase family protein
Ca28852	Ca2	2013448	2022406	1.78921	5.04291	10.0287	6.20561e-10	7.47588e-08	12.8214	PREDICTED: mitotic checkpoint protein BUB3.3-like n_1 Tax_Cicer arietinum RepID_UPI000640E2E0	AT1G13950.1	eukaryotic	Medtr5g043000.1	transducin/WD40 repeat protein
Ca28849	Ca2	2043531	2046533	1.73501	3.25637	7.00367	3.56998e-07	5.25027e-06	6.52928	DUF538 family protein n_4 Tax_Papilionoideae RepID_G7JWQ2_MEDTR	AT2G03350.1	Protein of unknown function, DUF538	Medtr5g043190.1	DUF538 family protein
Ca28855	Ca2	2135030	2139929	-0.495257	4.66461	-5.19448	2.75859e-05	0.00015254	2.04747	PREDICTED: uncharacterized protein LOC101493792 n_1 Tax_Cicer arietinum RepID_UPI00032A94BC	AT1G69360.1	Plant protein of unknown function (DUF863)	Medtr5g043430.1	DUF863 family protein
Ca28863	Ca2	2155122	2159207	-0.899556	6.55323	-8.37508	1.725e-08	6.71345e-07	9.47001	PREDICTED: uncharacterized protein LOC101494419 isoform X1 n_2 Tax_Cicer arietinum RepID_UPI00032A524A	AT2G03390.1	uvrB/uvrC motif-containing protein	Medtr5g043480.2	UvrB/uvrC domain protein
Ca28864	Ca2	2179027	2183384	0.682376	2.44725	5.14165	3.1463e-05	0.000169685	2.17608	PREDICTED: 26S proteasome non-ATPase regulatory subunit 10 n_1 Tax_Cicer arietinum RepID_UPI00032A7264	AT2G03430.1	Ankyrin repeat family protein	Medtr5g043640.1	26S proteasome non-ATPase regulatory subunit 10
Ca28884	Ca2	2326913	2330285	-1.67344	0.922666	-6.93485	4.18333e-07	5.86471e-06	6.566	PREDICTED: probable WRKY transcription factor 57 n_1 Tax_Cicer arietinum RepID_UPI00032A9AEC	AT1G69310.2	WRKY DNA-binding protein	Medtr5g043880.1	WRKY family transcription factor
Ca28912	Ca2	2617629	2622927	0.416319	5.82266	5.55099	1.14163e-05	7.40197e-05	2.92534	PREDICTED: pentatricopeptide repeat-containing protein At1g26460 - mitochondrial n_1 Tax_Cicer arietinum RepID_UPI00032A7E13	AT1G26460.1	Tetratricopeptide repeat (TPR)-like	Medtr5g044270.1	PPR containing plant protein
Ca28934	Ca2	2889843	2910199	-0.58067	4.4569	-6.13094	2.78334e-06	2.48084e-05	4.35366	Purple acid phosphatase n_2 Tax_Papilionoideae RepID_G7JZ41_MEDTR	AT1G13750.1	Purple acid phosphatases superfamily	Medtr5g045600.1	inactive purple acid phosphatase-like protein
Ca28937	Ca2	2959423	2964377	2.8152	2.86479	6.95161	4.02468e-07	5.7316e-06	6.4761	PREDICTED: ninja-family protein AFP3 n_1 Tax_Cicer arietinum RepID_UPI000640F0B7	AT3G29575.4	ABI five binding protein 3	Medtr5g045370.1	ninja-family protein AFP1
Ca28942	Ca2	3018314	3021348	-0.625729	6.59524	-7.14161	2.6028e-07	4.13394e-06	6.73211	Uncharacterized protein n_3 Tax_Papilionoideae RepID_G7JZ19_MEDTR			#N/A	#N/A
Ca28941	Ca2	3052762	3054428	-2.93713	0.495073	-5.45625	1.44192e-05	8.98336e-05	3.20435	PREDICTED: cytochrome P450 78A5 n_1 Tax_Cicer arietinum RepID_UPI00032A4E5B	AT5G09970.1	cytochrome P450, family 78,	Medtr5g045250.1	cytochrome P450 family protein
Ca28950	Ca2	3117680	3120951	0.827358	1.91159	4.63837	0.000110845	0.000477438	1.04102	PREDICTED: pentatricopeptide repeat-containing protein At1g20230-like - partial n_1 Tax_Cicer arietinum RepID_UPI00032A8837	AT1G20230.1	Pentatricopeptide repeat (PPR) superfamily	Medtr7g076350.1	pentatricopeptide (PPR) repeat protein
Ca28961	Ca2	3186428	3190210	2.23573	4.532	8.70861	8.57374e-09	4.17629e-07	10.2012	PREDICTED: fructokinase-like 2 - chloroplastic n_1 Tax_Cicer arietinum RepID_UPI00032AABA1	AT1G69200.1	fructokinase-like 2	Medtr5g044990.1	pfkB family carbohydrate kinase
Ca28952	Ca2	3190418	3193141	1.34243	1.52099	6.98349	3.73968e-07	5.42809e-06	6.6728	PREDICTED: folate synthesis bifunctional protein - mitochondrial n_1 Tax_Cicer arietinum RepID_UPI00032AA15E	AT4G30000.1	Dihydropterin pyrophosphokinase / Dihydropteroate	Medtr5g044980.1	dihydropterin pyrophosphokinase/dihydropteroate synthase
Ca28993	Ca2	3763282	3764139	-1.35579	1.50187	-5.14669	3.10707e-05	0.000167924	2.39999	PREDICTED: uncharacterized protein LOC101504974 n_1 Tax_Cicer arietinum RepID_UPI00032ABBBF			Medtr5g046750.1	plant/F4N2-9 protein%2C putative
Ca29069	Ca2	4593332	4598872	-0.733179	8.44527	-6.98112	3.7601e-07	5.44283e-06	6.33854	Serine/Threonine kinase domain protein n_2 Tax_Papilionoideae RepID_G7JX40_MEDTR	AT1G68830.1	STT7 homolog STN7	Medtr5g053450.1	Serine/Threonine kinase domain protein
Ca29064	Ca2	4628002	4636154	0.94774	4.01708	5.91952	4.63814e-06	3.70833e-05	3.87312	LRR Di-glucose-binding protein n_2 Tax_Papilionoideae RepID_G7JX54_MEDTR	AT1G25570.1	Di-glucose binding protein with Leucine-rich	Medtr5g053610.1	LRR Di-glucose-binding protein
Ca29113	Ca2	5366313	5371227	-2.10373	1.99395	-12.2376	1.21843e-11	7.86279e-09	16.6588	Protein NSP-INTERACTING KINASE 2 n_7 Tax_Phaseoleae RepID_A0A0B2PJ86_GLYSO	AT5G16000.1	NSP-interacting kinase 1	Medtr0049s0070.2	NSP-interacting kinase-like protein
Ca29119	Ca2	5453881	5455370	0.776943	5.65063	5.48396	1.34662e-05	8.48028e-05	2.75945	PREDICTED: 60S acidic ribosomal protein P2-1-like n_2 Tax_Cicer arietinum RepID_UPI00032AAB48			#N/A	#N/A
Ca29143	Ca2	5937200	5937775	-1.13409	5.35606	-6.24273	2.12885e-06	2.01241e-05	4.60983	PREDICTED: uncharacterized N-acetyltransferase ycf52 n_1 Tax_Cicer arietinum RepID_UPI00032A5EC6	AT1G26220.1	Acyl-CoA N-acyltransferases (NAT) superfamily	Medtr1g018030.2	acyl-CoA N-acyltransferase domain protein
Ca29248	Ca2	7645930	7651447	-0.743966	6.50974	-5.53324	1.19263e-05	7.69103e-05	2.88511	Cryptochrome protein n_18 Tax_Papilionoideae RepID_A2Q6E2_MEDTR	AT4G08920.1	cryptochrome	Medtr5g063920.3	cryptochrome protein
Ca29274	Ca2	7905528	7913218	-1.35986	1.90988	-4.87384	6.14182e-05	0.000294019	1.61241	PREDICTED: uncharacterized protein LOC101499348 n_1 Tax_Cicer arietinum RepID_UPI000640D921			#N/A	#N/A
Ca29269	Ca2	7972513	7975036	-0.34862	8.36253	-6.05483	3.34325e-06	2.86792e-05	4.13943	14-3-3-like protein A n_20 Tax_Pentapetalae RepID_1433A_VICFA	AT1G78300.1	general	Medtr5g064580.1	general regulatory factor 2
Ca29280	Ca2	8028917	8034293	-0.752361	8.84236	-5.00553	4.41825e-05	0.000223691	1.53389	PREDICTED: thylakoid lumenal 29 kDa protein - chloroplastic isoform X1 n_2 Tax_Cicer arietinum RepID_UPI00032AB072	AT4G09010.1	ascorbate peroxidase 4	Medtr5g064610.1	thylakoid lumenal 29 kDa protein
Ca29292	Ca2	8228818	8229924	-1.52422	2.83048	-6.12747	2.80666e-06	2.49529e-05	4.50947	PREDICTED: RING-H2 finger protein ATL54 n_1 Tax_Cicer arietinum RepID_UPI00032A6FC1	AT1G72220.1	RING/U-box superfamily protein	Medtr5g064890.1	RING-H2 zinc finger protein
Ca29331	Ca2	8866225	8869510	-0.779957	5.62215	-7.65255	8.2521e-08	1.86434e-06	7.88688	Transport inhibitor response protein - putative n_2 Tax_Papilionoideae RepID_G7KBF5_MEDTR	AT5G49980.1	auxin F-box protein 5	Medtr5g065490.1	transport inhibitor response protein%2C putative
Ca29352	Ca2	9053661	9056002	-0.695306	3.42307	-5.43635	1.51456e-05	9.35588e-05	2.74125	Target SNARE coiled-coil protein n_2 Tax_Papilionoideae RepID_G7KBG1_MEDTR	AT4G14600.1	Target SNARE coiled-coil domain protein	Medtr5g065550.1	target SNARE coiled-coil protein
Ca29368	Ca2	9204741	9208371	0.731067	6.48925	5.7134	7.66404e-06	5.4533e-05	3.3275	PREDICTED: transcription factor bHLH143-like isoform X1 n_1 Tax_Cicer arietinum RepID_UPI00032A9CCF	AT5G50010.1	sequence-specific DNA binding transcription	Medtr5g065670.1	transcription factor
Ca29376	Ca2	9429987	9431819	0.92789	8.18763	5.88661	5.024e-06	3.95075e-05	3.73307	Uncharacterized protein (Fragment) n_1 Tax_Capsella rubella RepID_R0FI18_9BRAS	AT5G65360.1	Histone superfamily protein	Medtr7g013610.1	core histone H2A/H2B/H3/H4
Ca29382	Ca2	9501287	9509470	-1.06608	7.91711	-6.81376	5.53747e-07	7.14128e-06	5.96014	Glucose-6-phosphate isomerase n_2 Tax_Papilionoideae RepID_G7KBI3_MEDTR	AT4G24620.2	phosphoglucose isomerase 1	Medtr5g065880.1	glucose-6-phosphate isomerase
Ca29383	Ca2	9521416	9532277	1.31445	3.36319	6.26767	2.00565e-06	1.91608e-05	4.78573	PREDICTED: uncharacterized protein LOC101498131 n_1 Tax_Cicer arietinum RepID_UPI00032AA278	AT2G38940.1	phosphate transporter	Medtr5g065900.1	plant/MNA5-17 protein
Ca29416	Ca2	10135876	10138012	0.680036	2.47739	5.76415	6.77008e-06	4.97589e-05	3.68926	PREDICTED: uncharacterized protein LOC101505615 n_1 Tax_Cicer arietinum RepID_UPI00032A65F8			Medtr5g066450.2	hydroxyproline-rich glycoprotein family protein%2C putative
Ca29418	Ca2	10167686	10174666	-0.766023	2.80416	-6.70424	7.14748e-07	8.4786e-06	5.87409	PREDICTED: serine/threonine-protein kinase CTR1 isoform X1 n_1 Tax_Cicer arietinum RepID_UPI00032A5433	AT4G24480.1	Protein kinase superfamily protein	Medtr5g066490.1	ethylene-responsive kinase Le-CTR1
Ca29451	Ca2	10608565	10615223	-1.02439	5.01762	-7.74768	6.68859e-08	1.60906e-06	8.09873	Serine hydroxymethyltransferase n_4 Tax_Papilionoideae RepID_G7K5Z4_MEDTR	AT5G26780.2	serine hydroxymethyltransferase	Medtr5g067060.1	serine transhydroxymethyltransferase
Ca29465	Ca2	10854585	10858309	-0.912041	8.36421	-6.35152	1.64223e-06	1.64384e-05	4.85427	Glutamyl-tRNA reductase n_2 Tax_Papilionoideae RepID_B7FLG0_MEDTR	AT1G58290.1	Glutamyl-tRNA reductase family	Medtr5g067410.1	glutamyl-tRNA reductase
Ca29473	Ca2	11054939	11058771	-0.519783	2.85763	-6.30536	1.83312e-06	1.78129e-05	4.92623	PREDICTED: rhodanese-like domain-containing protein 7 n_1 Tax_Cicer arietinum RepID_UPI00032AB4B5	AT2G40760.1	Rhodanese/Cell cycle control phosphatase	Medtr5g067730.2	rhodanese-related sulfurtransferase
Ca29481	Ca2	11164018	11169854	-0.677783	7.39721	-6.71054	7.043e-07	8.41583e-06	5.72396	ABC1 family kinase n_2 Tax_Papilionoideae RepID_G7KD96_MEDTR	AT5G05200.1	Protein kinase superfamily protein	Medtr5g068050.1	ABC1 family kinase
Ca29487	Ca2	11225299	11227175	0.858301	6.69782	6.95495	3.99385e-07	5.69831e-06	6.29912	Uncharacterized protein n_1 Tax_Spinacia oleracea RepID_A0A0K9RUN0_SPIOL	AT1G14320.1	Ribosomal protein	Medtr2g090910.1	60S ribosomal protein L10-2
Ca29503	Ca2	11405533	11407433	1.33782	6.35925	7.63	8.67506e-08	1.94839e-06	7.83871	60S ribosomal protein L6 n_2 Tax_Papilionoideae RepID_G7K669_MEDTR	AT1G33140.1	Ribosomal protein L6 family	Medtr5g068780.1	60S ribosomal protein L6
Ca29502	Ca2	11434072	11436096	-0.61236	6.16918	-5.24866	2.41102e-05	0.000137036	2.1788	PREDICTED: L-type lectin-domain containing receptor kinase VIII.1-like n_1 Tax_Cicer arietinum RepID_UPI00032A8D0B	AT5G01560.1	lectin receptor kinase a4.3	Medtr5g068770.1	lectin-like receptor kinase%2C putative
Ca29508	Ca2	11441414	11444041	-1.35077	4.3846	-8.60524	1.06313e-08	4.76295e-07	9.96921	PREDICTED: zinc finger with UFM1-specific peptidase domain protein-like isoform X1 n_2 Tax_Cicer arietinum RepID_UPI00032AA107	AT5G24680.1	Peptidase C78, ubiquitin fold modifier-specific	Medtr5g068730.1	zinc finger with UFM1-specific peptidase domain protein
Ca29520	Ca2	11620841	11623623	-2.8793	0.465121	-5.83402	5.70953e-06	4.35982e-05	4.06634	Heavy metal transport/detoxification domain protein n_2 Tax_Papilionoideae RepID_G7KDZ8_MEDTR	AT5G24580.2	Heavy metal transport/detoxification	Medtr5g069180.1	heavy metal transport/detoxification domain protein
Ca29543	Ca2	11885988	11890148	-0.969456	1.7809	-6.47212	1.23363e-06	1.31136e-05	5.47298	PREDICTED: protein RBL-like n_1 Tax_Cicer arietinum RepID_UPI00032A5B75	AT3G21060.1	Transducin/WD40 repeat-like superfamily	Medtr8g041740.1	retinoblastoma-binding-like protein
Ca29540	Ca2	11900421	11904587	-1.13153	5.29579	-7.20749	2.24017e-07	3.75695e-06	6.87822	Anion transporter 4 n_2 Tax_Papilionoideae RepID_G7KE37_MEDTR	AT3G46980.2	phosphate transporter 4;3	Medtr5g069630.1	anion transporter 4
Ca29538	Ca2	11910719	11912787	-0.976354	2.12311	-4.74224	8.54117e-05	0.00038502	1.24481	PREDICTED: acyl-coenzyme A thioesterase 13 n_1 Tax_Cicer arietinum RepID_UPI00032AA5EC	AT2G29590.1	Thioesterase superfamily protein	Medtr5g069640.1	acyl-CoA thioesterase%2C putative
Ca29553	Ca2	12000216	12006891	-1.23574	1.41964	-4.98857	4.60959e-05	0.000231236	1.98697	PREDICTED: rho GTPase-activating protein gacU-like isoform X1 n_3 Tax_Cicer arietinum RepID_UPI00032A9A04	AT5G17910.2	unknown protein; FUNCTIONS IN: molecular_function	Medtr5g069750.1	transmembrane protein%2C putative
Ca29550	Ca2	12018047	12025232	-0.439453	6.98751	-5.57337	1.08049e-05	7.06547e-05	2.98225	PREDICTED: ATP-dependent zinc metalloprotease FTSH 7 - chloroplastic-like n_1 Tax_Cicer arietinum RepID_UPI00032A7D74	AT3G47060.1	FTSH protease 7	Medtr5g069780.1	ATP-dependent zinc metalloprotease FTSH protein
Ca29563	Ca2	12087160	12091331	-0.790563	3.77346	-4.99411	4.54618e-05	0.000228655	1.60909	Glycosyltransferase n_2 Tax_Cicer arietinum RepID_A0A067XT84_CICAR	AT1G07260.1	UDP-glucosyl transferase 71C3	Medtr5g070090.1	UDP-glucosyltransferase family protein
Ca29569	Ca2	12190019	12192116	-0.792094	4.84084	-6.48307	1.20208e-06	1.28662e-05	5.18786	PREDICTED: cytochrome P450 CYP736A12-like n_3 Tax_Cicer arietinum RepID_UPI000640F9E7	AT4G36220.1	ferulic acid 5-hydroxylase	Medtr5g070700.1	cytochrome P450 family 71 protein
Ca29577	Ca2	12341676	12348163	-1.11392	4.22815	-6.596	9.21142e-07	1.03442e-05	5.47831	Uncharacterized protein n_1 Tax_Phaseolus angularis RepID_A0A0L9UY07_PHAAN	AT1G19720.1	Pentatricopeptide repeat (PPR-like)	Medtr5g071190.1	PPR containing plant-like protein
Ca29585	Ca2	12412663	12416230	-1.75097	0.488124	-5.80943	6.06209e-06	4.56005e-05	4.01917	PREDICTED: protein PMR5-like n_1 Tax_Cicer arietinum RepID_UPI00032A7351	AT5G58600.2	Plant protein of unknown function	Medtr5g071350.1	Pmr5/Cas1p GDSL/SGNH-like acyl-esterase family protein
Ca29594	Ca2	12548956	12551744	-0.964378	2.82436	-11.3049	5.99686e-11	1.79847e-08	15.2052	PREDICTED: U11/U12 small nuclear ribonucleoprotein 31 kDa protein n_1 Tax_Cicer arietinum RepID_UPI00032AA40A			Medtr5g071540.1	RNA-binding (RRM/RBD/RNP motif) family protein
Ca29600	Ca2	12626877	12630816	-1.01487	2.69606	-5.80819	6.08038e-06	4.57e-05	3.75653	PREDICTED: putative disease resistance protein RGA1 n_1 Tax_Cicer arietinum RepID_UPI00032A623A	AT3G14470.1	NB-ARC domain-containing disease resistance	Medtr5g071220.1	NB-ARC domain disease resistance protein
Ca29595	Ca2	12667092	12670495	-0.682562	4.38749	-5.5332	1.19275e-05	7.69103e-05	2.89702	PREDICTED: protein CHUP1 - chloroplastic isoform X1 n_2 Tax_Cicer arietinum RepID_UPI00032A6526	AT1G07120.1	FUNCTIONS IN: molecular_function unknown;	Medtr5g071817.1	SKIP interacting protein%2C putative
Ca29607	Ca2	12762617	12774670	0.797093	6.36322	5.4949	1.31078e-05	8.29132e-05	2.78943	Uncharacterized protein n_7 Tax_Phaseoleae RepID_K7KA83_SOYBN	AT2G30110.1	ubiquitin-activating	Medtr5g072480.1	ubiquitin-activating enzyme E1 1
Ca29612	Ca2	12828865	12835036	0.900939	3.79016	6.53127	1.07278e-06	1.1779e-05	5.36363	Uncharacterized protein n_1 Tax_Morus notabilis RepID_W9QTF3_9ROSA			#N/A	#N/A
Ca29615	Ca2	12835932	12839695	0.753383	3.95263	7.18918	2.33543e-07	3.8575e-06	6.8799	PREDICTED: serine carboxypeptidase-like 42 n_1 Tax_Cicer arietinum RepID_UPI00032A74D6	AT5G42240.1	serine carboxypeptidase-like	Medtr5g072570.1	serine carboxypeptidase-like protein
Ca29617	Ca2	12845783	12848840	-1.31964	4.6124	-9.03278	4.40719e-09	2.76262e-07	10.8546	Uncharacterized protein n_1 Tax_Medicago truncatula RepID_A0A072UBB0_MEDTR			#N/A	#N/A
Ca29613	Ca2	12874258	12875598	3.56691	1.7214	7.30847	1.78192e-07	3.21398e-06	7.11593	PREDICTED: protein CHLOROPLAST IMPORT APPARATUS 2 isoform X2 n_1 Tax_Cicer arietinum RepID_UPI00032A6E78	AT1G07050.1	CCT motif family protein	Medtr5g072780.1	CCT motif protein
Ca29636	Ca2	13054016	13057864	0.763738	3.72669	6.21376	2.28172e-06	2.12022e-05	4.60781	PREDICTED: adenylosuccinate lyase-like n_1 Tax_Cicer arietinum RepID_UPI00032A4D76	AT4G18440.1	L-Aspartase-like family protein	Medtr7g092860.3	adenylosuccinate lyase
Ca29640	Ca2	13178019	13179977	1.30405	2.8088	8.02097	3.68275e-08	1.12206e-06	8.85488	PREDICTED: uncharacterized protein LOC101502083 n_1 Tax_Cicer arietinum RepID_UPI00032AB56F	AT5G58430.1	exocyst subunit exo70	Medtr5g073840.1	transmembrane protein%2C putative
Ca29648	Ca2	13225871	13226992	-0.999642	1.76116	-4.84184	6.65421e-05	0.00031364	1.56203	PREDICTED: probable WRKY transcription factor 33 isoform X2 n_1 Tax_Cicer arietinum RepID_UPI00032A81E9	AT2G38470.1	WRKY DNA-binding protein	Medtr5g074200.1	WRKY family transcription factor
Ca29658	Ca2	13318950	13334444	0.714152	4.01903	5.09142	3.56585e-05	0.000187873	1.83027	PREDICTED: E3 ubiquitin-protein ligase listerin n_1 Tax_Cicer arietinum RepID_UPI00032A8020	AT5G58410.1	HEAT/U-box domain-containing protein	Medtr5g074510.2	E3 ubiquitin-protein ligase listerin-like protein
Ca29653	Ca2	13355036	13356295	5.93185	1.76076	10.9785	1.07105e-10	2.51594e-08	14.2955	PREDICTED: trans-resveratrol di-O-methyltransferase-like n_1 Tax_Cicer arietinum RepID_UPI00032A5AF4	AT4G35160.1	O-methyltransferase family protein	Medtr5g074580.1	orcinol O-methyltransferase
Ca29668	Ca2	13537874	13542957	-1.94007	0.147456	-5.473	1.38354e-05	8.68334e-05	3.23584	PREDICTED: peroxidase 4-like n_1 Tax_Cicer arietinum RepID_UPI00032A60E9	AT5G58400.1	Peroxidase superfamily protein	Medtr5g074970.1	class III peroxidase
Ca29676	Ca2	13598986	13601239	2.56683	1.3563	4.55304	0.000137332	0.000568932	1.01756	PREDICTED: CBL-interacting serine/threonine-protein kinase 2-like n_1 Tax_Cicer arietinum RepID_UPI00032A97DA	AT5G58380.1	SOS3-interacting	Medtr5g075060.1	CBL-interacting kinase
Ca29678	Ca2	13622985	13625100	-0.548141	4.54455	-4.81625	7.09477e-05	0.000331088	1.11098	PREDICTED: CBL-interacting serine/threonine-protein kinase 11-like n_1 Tax_Cicer arietinum RepID_UPI00032A6691	AT2G30360.1	SOS3-interacting	Medtr5g075100.1	CBL-interacting kinase
Ca29695	Ca2	13800406	13804891	1.28061	7.30265	5.19865	2.73017e-05	0.000151297	2.04811	Trans-cinnamate 4-monooxygenase n_14 Tax_Papilionoideae RepID_TCMO_CICAR	AT2G30490.1	cinnamate-4-hydroxylase	Medtr5g075450.1	cytochrome P450 family cinnamate 4-hydroxylase
Ca29714	Ca2	14099412	14102160	1.19898	3.08844	6.89418	4.59558e-07	6.28145e-06	6.289	Receptor-like kinase n_2 Tax_Papilionoideae RepID_G7K0V8_MEDTR	AT5G58300.2	Leucine-rich repeat protein kinase	Medtr5g075630.1	receptor-like kinase
Ca29726	Ca2	14242182	14245458	-0.632543	5.86931	-4.87889	6.06463e-05	0.000290506	1.25686	Cystathionine beta-synthase (CBS) family protein n_5 Tax_Papilionoideae RepID_G7K5X3_MEDTR	AT5G10860.1	Cystathionine beta-synthase (CBS) family	Medtr5g076080.1	cystathionine beta-synthase (CBS) family protein
Ca29730	Ca2	14356609	14359869	-0.874969	2.60117	-6.12474	2.82517e-06	2.50488e-05	4.53311	Lecithin retinol acyltransferase n_2 Tax_Papilionoideae RepID_G7K5Y9_MEDTR	AT3G02700.1	NC domain-containing protein-related	Medtr5g076250.1	lecithin retinol acyltransferase
Ca29739	Ca2	14417071	14419261	-1.05285	3.35851	-4.84052	6.67629e-05	0.00031439	1.27453	PREDICTED: CASP-like protein 2A2 n_1 Tax_Cicer arietinum RepID_UPI00032AB136	AT3G14380.1	Uncharacterised protein family (UPF0497)	Medtr5g076480.1	CASP POPTRDRAFT-like protein
Ca29742	Ca2	14438364	14442591	-0.597164	8.50908	-7.94885	4.30669e-08	1.20114e-06	8.5244	Squalene/phytoene synthase n_2 Tax_Papilionoideae RepID_G7KFR8_MEDTR	AT5G17230.2	PHYTOENE SYNTHASE	Medtr5g076620.7	squalene/phytoene synthase
Ca29753	Ca2	14512574	14516145	2.36985	3.86303	5.46431	1.41352e-05	8.82826e-05	2.82961	PREDICTED: protein REVEILLE 2 isoform X1 n_2 Tax_Cicer arietinum RepID_UPI00032AA309			Medtr5g076960.2	myb transcription factor
Ca29747	Ca2	14553988	14559334	0.624679	7.21708	6.6412	8.28416e-07	9.52679e-06	5.56166	Isocitrate dehydrogenase [NADP] - chloroplastic (Fragment) n_9 Tax_Pentapetalae RepID_IDHP_MEDSA	AT1G65930.1	cytosolic NADP+-dependent isocitrate	Medtr5g077070.2	NADP-dependent isocitrate dehydrogenase
Ca29822	Ca2	15418028	15423320	0.735077	1.85509	5.07222	3.74071e-05	0.000195039	2.11507	PREDICTED: putative pentatricopeptide repeat-containing protein At1g09680 n_1 Tax_Cicer arietinum RepID_UPI00032A8F53	AT1G09680.1	Pentatricopeptide repeat (PPR) superfamily	Medtr5g077930.1	PPR containing plant-like protein
Ca29832	Ca2	15449359	15455676	0.514761	3.09745	5.10178	3.47494e-05	0.000183971	1.9619	PREDICTED: tRNA threonylcarbamoyladenosine dehydratase 2-like isoform X2 n_1 Tax_Cicer arietinum RepID_UPI00032A8D5A	AT5G37530.1	NAD(P)-binding Rossmann-fold superfamily	Medtr5g077840.1	rossmann-fold NAD(P)-binding domain protein
Ca29854	Ca2	15785406	15793418	-0.745197	5.20995	-6.66575	7.82096e-07	9.13839e-06	5.61779	PREDICTED: pyridoxal kinase isoform X1 n_2 Tax_Cicer arietinum RepID_UPI00032A4FA3			Medtr5g079730.2	pyridoxal kinase
Ca29875	Ca2	16108233	16109905	1.30449	1.37118	6.78031	5.98545e-07	7.49774e-06	6.22202	PREDICTED: rRNA methyltransferase 2 - mitochondrial n_1 Tax_Cicer arietinum RepID_UPI00032A84AE	AT5G13830.1	FtsJ-like methyltransferase family	Medtr5g080020.1	ribosomal RNA large subunit methyltransferase
Ca29891	Ca2	16189827	16194101	-0.302179	4.51432	-5.04396	4.01408e-05	0.00020644	1.67789	PREDICTED: serine/arginine-rich SC35-like splicing factor SCL30 n_1 Tax_Cicer arietinum RepID_UPI00032A9F53	AT3G55460.1	SC35-like splicing factor	Medtr5g079870.2	RNA recognition motif%2C a.k.a. RRM%2C RBD protein
Ca29889	Ca2	16196351	16199779	2.03266	6.29144	10.3359	3.4752e-10	5.21109e-08	13.4023	23S rRNA m2A2503 methyltransferase n_2 Tax_Papilionoideae RepID_G7KBR0_MEDTR	AT2G39670.2	Radical SAM superfamily protein	Medtr5g079860.1	23S rRNA m2A2503 methyltransferase
Ca29892	Ca2	16200650	16211192	0.974669	3.93042	4.82089	7.01284e-05	0.000328016	1.16775	PREDICTED: protein kinase APK1A - chloroplastic-like n_1 Tax_Cicer arietinum RepID_UPI00032A68E2	AT2G28930.2	protein kinase 1B	Medtr5g079840.1	kinase 1B
Ca29882	Ca2	16283109	16285311	1.88788	2.87014	7.05516	3.17192e-07	4.77976e-06	6.71218	PREDICTED: uncharacterized protein At2g39795 - mitochondrial-like n_1 Tax_Cicer arietinum RepID_UPI00032A9C67	AT3G55605.1	Mitochondrial glycoprotein family protein	Medtr5g080880.1	glycoprotein family protein
Ca29905	Ca2	16393840	16398580	-2.75757	3.144	-8.18786	2.57057e-08	8.7764e-07	9.1814	PREDICTED: uncharacterized protein LOC101512469 isoform X1 n_2 Tax_Cicer arietinum RepID_UPI00032A5CDA			#N/A	#N/A
Ca29904	Ca2	16447330	16449552	1.77396	4.68062	6.35816	1.6165e-06	1.6234e-05	4.90399	PREDICTED: uncharacterized protein LOC101513331 n_1 Tax_Cicer arietinum RepID_UPI00032A8771			Medtr5g081460.1	hypothetical protein
Ca29911	Ca2	16552889	16556589	1.36564	4.96519	7.3373	1.66962e-07	3.06838e-06	7.18095	60S ribosomal L35a-1-like protein n_3 Tax_rosids RepID_A0A0B0N9V3_GOSAR	AT1G74270.1	Ribosomal protein L35Ae family protein	Medtr5g081705.1	60S ribosomal protein L35a-3
Ca29915	Ca2	16594281	16595645	-1.29526	1.40787	-4.78842	7.60727e-05	0.000350567	1.51051	PREDICTED: transcription factor DIVARICATA-like n_1 Tax_Cicer arietinum RepID_UPI00032AC2C2	AT2G38090.1	Duplicated homeodomain-like superfamily	Medtr5g081860.1	MYB transcription factor MYB51
Ca29919	Ca2	16684484	16687537	0.539083	3.57668	5.191	2.78261e-05	0.000153646	2.12241	Eukaryotic translation initiation factor 3 subunit F n_2 Tax_Papilionoideae RepID_G7KBY4_MEDTR	AT2G39990.1	eukaryotic translation	Medtr5g082000.1	eukaryotic translation initiation factor 3 subunit F
Ca29929	Ca2	16747125	16749686	2.07783	6.63218	7.23503	2.10436e-07	3.60408e-06	6.94369	PREDICTED: 60S acidic ribosomal protein P0-like n_2 Tax_rosids RepID_UPI00032A9EDC	AT3G09200.1	Ribosomal protein L10 family protein	Medtr5g082180.1	60S acidic ribosomal protein P0-1
Ca29930	Ca2	16754275	16756835	1.34179	6.3438	7.36653	1.56315e-07	2.94075e-06	7.24465	PREDICTED: 60S acidic ribosomal protein P0-like n_2 Tax_rosids RepID_UPI00032A9EDC	AT3G09200.1	Ribosomal protein L10 family protein	Medtr5g082180.1	60S acidic ribosomal protein P0-1
Ca29937	Ca2	16827710	16831060	-0.843711	3.51455	-5.59108	1.03447e-05	6.85837e-05	3.1106	PREDICTED: protein yippee-like n_2 Tax_Papilionoideae RepID_UPI00032A5A17	AT2G40110.2	Yippee family putative zinc-binding	Medtr5g082490.1	yippee family zinc-binding protein%2C putative
Ca29944	Ca2	16918077	16923251	1.84222	2.80225	7.148	2.56516e-07	4.09115e-06	6.92955	PREDICTED: phosphoinositide phospholipase C 6-like isoform X1 n_3 Tax_Cicer arietinum RepID_UPI00032A8308	AT2G40116.1	Phosphoinositide-specific phospholipase	Medtr5g082590.1	phosphoinositide-specific phospholipase C family protein
Ca29943	Ca2	16963348	16969426	0.526246	3.07999	5.73895	7.19982e-06	5.20264e-05	3.53285	PREDICTED: tRNA threonylcarbamoyladenosine dehydratase 2-like isoform X2 n_1 Tax_Cicer arietinum RepID_UPI00032A8D5A	AT5G37530.1	NAD(P)-binding Rossmann-fold superfamily	Medtr5g077840.1	rossmann-fold NAD(P)-binding domain protein
Ca29945	Ca2	16971766	16976988	-0.547941	5.26847	-6.02838	3.56362e-06	3.01136e-05	4.09121	Uncharacterized protein n_5 Tax_Papilionoideae RepID_A0A0L9UVZ0_PHAAN	AT3G55960.1	Haloacid dehalogenase-like hydrolase	Medtr5g082660.1	NLI interacting factor-like phosphatase
Ca29951	Ca2	17068167	17082980	-0.563116	3.61702	-4.99677	4.51601e-05	0.000227436	1.63103	PREDICTED: lethal(2) giant larvae protein homolog SRO77 isoform X1 n_2 Tax_Cicer arietinum RepID_UPI00032A7F8C	AT4G23160.1	cysteine-rich RLK (RECEPTOR-like	Medtr5g082840.1	nucleotide-binding protein%2C putative
Ca29956	Ca2	17096197	17099446	-1.13029	4.86166	-4.93731	5.23975e-05	0.000257898	1.40327	PREDICTED: protein ESKIMO 1-like n_1 Tax_Cicer arietinum RepID_UPI00032AD108	AT3G55990.1	Plant protein of unknown	Medtr5g082880.1	Pmr5/Cas1p GDSL/SGNH-like acyl-esterase family protein
Ca29958	Ca2	17100574	17130639	0.91631	1.97293	4.72208	8.98425e-05	0.000400845	1.24852	Anaphase-promoting complex subunit 1 n_2 Tax_Papilionoideae RepID_G7K258_MEDTR	AT5G05560.1	E3 ubiquitin ligase, putative	Medtr5g082890.1	anaphase-promoting complex subunit 1
Ca30011	Ca2	17976236	17980227	0.874499	2.7024	7.59706	9.33293e-08	2.05392e-06	7.93268	Uncharacterized protein n_10 Tax_Papilionoideae RepID_I1JVB1_SOYBN	AT4G09012.1	Mitochondrial ribosomal protein L27	Medtr5g045910.1	LRR receptor-like kinase family protein
Ca30014	Ca2	18007133	18011331	-3.21056	3.02705	-8.56211	1.16345e-08	5.05549e-07	9.98425	PREDICTED: GDSL esterase/lipase At4g26790-like n_1 Tax_Cicer arietinum RepID_UPI00032A698D	AT2G42990.1	GDSL-like Lipase/Acylhydrolase superfamily	Medtr5g084750.1	GDSL-like lipase/acylhydrolase
Ca30075	Ca2	18611918	18615278	-0.62362	6.53532	-5.66012	8.73217e-06	6.02158e-05	3.19761	PREDICTED: protein SPA - chloroplastic n_1 Tax_Cicer arietinum RepID_UPI00032A6229			#N/A	#N/A
Ca30086	Ca2	18773639	18780959	-1.76253	5.91068	-6.24274	2.12879e-06	2.01241e-05	4.61241	Molybdenum cofactor biosynthesis protein CNX1 n_4 Tax_Papilionoideae RepID_G7KHG7_MEDTR	AT5G20990.1	molybdopterin	Medtr5g087490.2	molybdenum cofactor biosynthesis protein CNX1
Ca30090	Ca2	18852360	18858987	0.963568	5.17679	7.49555	1.17023e-07	2.40251e-06	7.53623	T-complex protein 1 subunit eta n_72 Tax_Mesangiospermae RepID_TCPH_ARATH	AT3G11830.1	TCP-1/cpn60 chaperonin family protein	Medtr5g087560.1	TCP-1/cpn60 chaperonin family protein
Ca30099	Ca2	18940637	18944525	1.08684	2.16852	7.27769	1.91041e-07	3.33941e-06	7.27641	PREDICTED: uncharacterized protein LOC101511610 n_1 Tax_Cicer arietinum RepID_UPI00032A59D0	AT2G27090.1	Protein of unknown function (DUF630	Medtr5g087740.2	BZIP transcription factor
Ca30107	Ca2	19057564	19059717	-0.832094	1.62656	-5.52602	1.21402e-05	7.80512e-05	3.25105	PREDICTED: ABSCISIC ACID-INSENSITIVE 5-like protein 2 n_1 Tax_Cicer arietinum RepID_UPI00032A65A4	AT3G56850.1	ABA-responsive element	Medtr5g088230.2	bZIP transcription factor
Ca30117	Ca2	19083894	19089348	-0.524798	2.58617	-5.01042	4.36463e-05	0.000221343	1.81696	PREDICTED: phosphatidylinositol glycan anchor biosynthesis class U protein isoform X2 n_3 Tax_Cicer arietinum RepID_UPI00032A5C22	AT1G12730.2	GPI transamidase subunit PIG-U	Medtr4g102820.1	GPI transamidase subunit PIG-U
Ca30121	Ca2	19094668	19096522	0.596694	7.25731	7.74682	6.70134e-08	1.60906e-06	8.09741	Uncharacterized protein n_2 Tax_Eukaryota RepID_A0A067LFG9_JATCU	AT3G43810.1	calmodulin 7	Medtr5g088320.1	EF hand calcium-binding family protein
Ca30123	Ca2	19105262	19109549	0.702339	6.55035	7.12516	2.70245e-07	4.22427e-06	6.6936	PREDICTED: protein TRIGALACTOSYLDIACYLGLYCEROL 2 - chloroplastic-like n_1 Tax_Cicer arietinum RepID_UPI00032AC390	AT3G20320.2	trigalactosyldiacylglycerol2	Medtr5g088340.3	ABC-type transport system protein
Ca30122	Ca2	19113408	19119506	-0.56755	7.51199	-5.02442	4.21472e-05	0.000215095	1.61613	Non-specific serine/threonine protein kinase n_1 Tax_Glycine max RepID_K7M4U3_SOYBN	AT2G26980.1	CBL-interacting protein	Medtr5g088350.3	CBL-interacting kinase
Ca30115	Ca2	19185103	19187328	0.910059	6.91654	5.77256	6.63246e-06	4.90065e-05	3.47125	PREDICTED: elongation factor 1-beta n_1 Tax_Cicer arietinum RepID_UPI00032AB1E6	AT2G18110.1	Translation elongation factor EF1B/ribosomal	Medtr5g088660.1	elongation factor 1-beta
Ca30124	Ca2	19257905	19260076	0.642764	4.29104	6.08774	3.08828e-06	2.69454e-05	4.26134	PREDICTED: blue copper protein-like n_1 Tax_Cicer arietinum RepID_UPI00032A82EF	AT1G08500.1	early nodulin-like	Medtr5g088990.1	plastocyanin-like domain protein
Ca30137	Ca2	19322067	19325262	-1.11557	3.92513	-7.13411	2.64778e-07	4.17787e-06	6.75571	PREDICTED: F-box protein At2g26850-like n_1 Tax_Cicer arietinum RepID_UPI00032A5F7F	AT2G32560.1	F-box family protein	Medtr5g089110.2	F-box plant-like protein
Ca30138	Ca2	19358608	19360273	1.64071	2.47016	8.11519	3.00487e-08	9.77861e-07	9.08786	Small nuclear ribonucleoprotein family protein n_1 Tax_Theobroma cacao RepID_A0A061G7A6_THECC			#N/A	#N/A
Ca30143	Ca2	19401208	19405683	-1.02055	2.68381	-5.23502	2.49415e-05	0.000141184	2.35583	PREDICTED: crt homolog 1 n_1 Tax_Cicer arietinum RepID_UPI00032A68BF			Medtr5g089340.3	CRT (chloroquine-resistance transporter)-like transporter%2C putative
Ca30166	Ca2	19747349	19751411	0.397282	4.03597	5.12266	3.29873e-05	0.000175811	1.9045	PREDICTED: GTP-binding protein At3g49725 - chloroplastic n_1 Tax_Cicer arietinum RepID_UPI00032AC076	AT3G49725.1	GTP-binding protein, HflX	Medtr5g089970.1	GTP-binding protein HflX
Ca30165	Ca2	19755635	19758312	0.663673	5.97414	5.70255	7.87027e-06	5.55239e-05	3.29882	Fission 1 protein n_2 Tax_Papilionoideae RepID_B7FH42_MEDTR			Medtr5g090010.1	fission 1 protein
Ca30173	Ca2	19820125	19824906	1.18479	5.8833	6.34437	1.67043e-06	1.66495e-05	4.85671	PREDICTED: DEAD-box ATP-dependent RNA helicase 53-like n_1 Tax_Cicer arietinum RepID_UPI00032A9B6D	AT3G22330.1	putative mitochondrial	Medtr5g090120.1	DEAD-box ATP-dependent RNA helicase-like protein
Ca30182	Ca2	19832154	19838340	-0.866683	3.91186	-6.32995	1.72878e-06	1.70203e-05	4.86608	PREDICTED: uncharacterized protein At3g49140 isoform X1 n_5 Tax_Cicer arietinum RepID_UPI00032A6BF0			Medtr5g090150.1	PPR superfamily protein
Ca30203	Ca2	20135157	20137783	-1.01703	7.37466	-5.8134	6.00359e-06	4.52786e-05	3.56842	PREDICTED: phytoene synthase 2 - chloroplastic-like n_1 Tax_Cicer arietinum RepID_UPI00032AB4E8	AT5G17230.2	PHYTOENE SYNTHASE	Medtr5g090780.1	squalene/phytoene synthase
Ca30208	Ca2	20224336	20231135	1.1727	5.26361	6.54653	1.03487e-06	1.14195e-05	5.34023	PREDICTED: aspartic proteinase nepenthesin-1 n_1 Tax_Vigna radiata var. radiata RepID_UPI000711AA99	AT3G59080.1	Eukaryotic aspartyl protease family	Medtr5g091130.1	eukaryotic aspartyl protease family protein
Ca30213	Ca2	20231012	20232505	-0.900432	5.46963	-6.16533	2.56265e-06	2.31516e-05	4.42411	PREDICTED: uncharacterized protein LOC101504758 n_1 Tax_Cicer arietinum RepID_UPI00032A7134	AT2G42975.1	unknown protein; FUNCTIONS IN: molecular_function	Medtr5g091190.1	transmembrane protein%2C putative
Ca30211	Ca2	20234398	20236414	-0.623401	3.8092	-4.82936	6.86559e-05	0.000321917	1.19269	PREDICTED: GDSL esterase/lipase At4g10955-like n_1 Tax_Cicer arietinum RepID_UPI000640BCED	AT5G50890.1	alpha/beta-Hydrolases superfamily protein	Medtr5g091200.1	triacylglycerol lipase
Ca30215	Ca2	20330892	20331653	-1.30428	5.70991	-6.88729	4.66946e-07	6.35404e-06	6.13925	AT hook motif DNA-binding family protein n_5 Tax_Papilionoideae RepID_G7K3C4_MEDTR	AT2G42940.1	Predicted AT-hook DNA-binding family	Medtr5g091630.1	AT hook motif DNA-binding family protein
Ca30240	Ca2	20458082	20466301	-0.694254	5.13755	-5.45271	1.45459e-05	9.04754e-05	2.68182	PREDICTED: probable LRR receptor-like serine/threonine-protein kinase At1g07650 isoform X1 n_2 Tax_Cicer arietinum RepID_UPI00032A8850	AT1G07650.1	Leucine-rich repeat transmembrane protein	Medtr5g091950.3	LRR receptor-like kinase
Ca30248	Ca2	20493203	20495597	2.11867	5.0366	6.98371	3.73778e-07	5.42809e-06	6.43241	PREDICTED: uncharacterized protein LOC101488254 n_1 Tax_Cicer arietinum RepID_UPI00032ABC62			Medtr5g091960.1	peroxisomal small heat shock protein
Ca30251	Ca2	20557333	20558178	1.24815	4.15881	9.40644	2.08146e-09	1.77854e-07	11.6292	Small nuclear ribonucleoprotein-associated protein n_9 Tax_Papilionoideae RepID_I1JJ67_SOYBN	AT4G20440.4	small nuclear ribonucleoprotein associated	Medtr5g092010.1	snRNP Sm family protein
Ca30260	Ca2	20603738	20607373	-1.1487	4.17675	-4.95642	4.99527e-05	0.000247338	1.49399	PREDICTED: uncharacterized protein LOC101490354 isoform X1 n_2 Tax_Cicer arietinum RepID_UPI00032A8768	AT3G47860.1	chloroplastic lipocalin	Medtr5g092080.2	lipocalin-like domain protein
Ca30278	Ca2	20772680	20774055	-0.903269	4.67777	-6.65453	8.02924e-07	9.34466e-06	5.59769	Eukaryotic translation initiation factor SUI1 n_1 Tax_Medicago truncatula RepID_G7K3H5_MEDTR	AT5G54940.2	Translation initiation factor SUI1	Medtr5g092820.1	eukaryotic translation initiation factor SUI1
Ca30288	Ca2	20812582	20814600	1.67916	1.33476	8.07616	3.26856e-08	1.0457e-06	9.0156	PREDICTED: mitochondrial acidic protein MAM33 n_1 Tax_Cicer arietinum RepID_UPI00032AA5DD	AT4G32605.1	Mitochondrial glycoprotein family protein	Medtr5g093000.1	glycoprotein family protein
Ca30290	Ca2	20835868	20839098	-3.51558	0.459784	-5.30625	2.08992e-05	0.000121772	2.84502	PREDICTED: GDSL esterase/lipase At5g55050-like n_1 Tax_Cicer arietinum RepID_UPI00032AA7ED	AT5G55050.1	GDSL-like Lipase/Acylhydrolase superfamily	Medtr5g093090.2	GDSL-like lipase/acylhydrolase
Ca30313	Ca2	20996147	21001481	-0.510739	5.23064	-5.00175	4.46019e-05	0.00022507	1.55989	PREDICTED: protein suppressor of white apricot isoform X1 n_3 Tax_Cicer arietinum RepID_UPI00032AC7A4	AT5G55100.2	SWAP (Suppressor-of-White-APricot)/surp	Medtr5g093560.4	SWAP (suppressor-of-white-APricot)/surp domain protein%2C putative
Ca30312	Ca2	21005715	21009717	1.38498	4.78337	8.01286	3.74796e-08	1.13067e-06	8.69577	PREDICTED: aspartate carbamoyltransferase 1 - chloroplastic isoform X1 n_1 Tax_Cicer arietinum RepID_UPI00032A90C8	AT3G20330.1	PYRIMIDINE B	Medtr5g093570.1	aspartate carbamoyltransferase%2C catalytic chain
Ca30310	Ca2	21032643	21037673	0.544019	9.48793	5.08459	3.62711e-05	0.000190249	1.70303	PREDICTED: trigger factor-like protein TIG - Chloroplastic n_1 Tax_Cicer arietinum RepID_UPI00032A8D95	AT5G55220.1	trigger factor type chaperone family	Medtr5g093830.1	trigger factor-like protein
Ca30315	Ca2	21047496	21051586	2.39114	3.83334	6.6526	8.06564e-07	9.34586e-06	5.66751	Microtubule associated protein - MAP65/ASE1 family protein n_6 Tax_Papilionoideae RepID_G7K8P9_MEDTR	AT5G55230.2	microtubule-associated proteins	Medtr5g093860.1	microtubule associated protein%2C MAP65/ASE1 family protein
Ca30314	Ca2	21080394	21083343	-1.19918	4.60248	-9.23723	2.91701e-09	2.13472e-07	11.265	PREDICTED: syntaxin-52-like isoform X1 n_2 Tax_Cicer arietinum RepID_UPI00032A902C	AT1G16240.2	syntaxin of plants 51	Medtr3g055200.1	syntaxin of plants protein
Ca30353	Ca2	21334996	21340532	12.8175	1.11147	6.03954	3.46887e-06	2.95085e-05	4.09314	PREDICTED: cytochrome P450 71D10-like n_1 Tax_Cicer arietinum RepID_UPI000640C2B2	AT2G45560.1	cytochrome P450, family 76,	Medtr4g048580.1	cytochrome P450 family 71 protein
Ca30352	Ca2	21349069	21351686	1.85641	4.58643	7.95938	4.20924e-08	1.19036e-06	8.58855	PREDICTED: uncharacterized protein LOC101503690 n_1 Tax_Cicer arietinum RepID_UPI0006417812	AT5G55580.1	Mitochondrial transcription termination	Medtr5g094610.1	transcription termination factor family protein
Ca30357	Ca2	21357978	21361636	-0.884724	3.90659	-4.93699	5.24396e-05	0.000257898	1.48141	PREDICTED: zinc finger CCCH domain-containing protein 18-like isoform X1 n_2 Tax_Cicer arietinum RepID_UPI00032A9DBF	AT2G05160.1	CCCH-type zinc fingerfamily protein	Medtr5g094700.1	RNA-binding domain CCCH-type zinc finger protein
Ca30373	Ca2	21432116	21433800	-0.91695	1.26703	-5.57751	1.06954e-05	7.01785e-05	3.42881	Serine acetyltransferase (Fragment) n_2 Tax_Cicer arietinum RepID_Q8L5G2_CICAR	AT3G13110.1		Medtr5g095470.1	serine acetyltransferase
Ca30370	Ca2	21440793	21444650	1.03	3.16411	7.22156	2.16969e-07	3.67909e-06	7.03929	PREDICTED: mitochondrial import inner membrane translocase subunit TIM50 n_1 Tax_Cicer arietinum RepID_UPI00032AC8E0	AT1G55900.1	Haloacid dehalogenase-like	Medtr5g095530.1	import inner membrane translocase subunit TIM50
Ca30365	Ca2	21463624	21465318	-1.40848	2.662	-7.85328	5.30496e-08	1.37992e-06	8.49126	PREDICTED: two-pore potassium channel 1 n_1 Tax_Cicer arietinum RepID_UPI00032AABBD	AT5G55630.2	Outward rectifying potassium	Medtr5g095650.2	outward rectifying potassium channel protein
Ca30380	Ca2	21486118	21492643	-0.725201	2.54162	-5.99879	3.82779e-06	3.18439e-05	4.24253	PREDICTED: golgin subfamily A member 6-like protein 22 n_1 Tax_Cicer arietinum RepID_UPI00032ACA83			Medtr5g095720.1	DEK carboxy-terminal domain protein
Ca30391	Ca2	21594483	21598432	-0.86428	5.1246	-5.73971	7.18654e-06	5.19708e-05	3.38724	PREDICTED: oligopeptide transporter 1-like n_1 Tax_Cicer arietinum RepID_UPI00032AAF3E	AT4G10770.1	oligopeptide transporter	Medtr5g096200.1	oligopeptide transporter OPT family protein
Ca30400	Ca2	21686026	21689176	-1.40521	3.87306	-7.32936	1.69977e-07	3.10239e-06	7.20381	PREDICTED: probable LRR receptor-like serine/threonine-protein kinase At4g26540 n_1 Tax_Cicer arietinum RepID_UPI00032A94D2	AT4G26540.1	Leucine-rich repeat receptor-like protein	Medtr5g096530.1	LRR receptor-like kinase family protein
Ca30401	Ca2	21771032	21774610	0.675897	4.46557	5.1538	3.05248e-05	0.000165735	1.95899	PREDICTED: cytochrome c oxidase assembly protein COX15 n_1 Tax_Cicer arietinum RepID_UPI00032A8A4E	AT5G56090.1	cytochrome c oxidase 15	Medtr5g096830.3	cytochrome C oxidase assembly protein COX15
Ca30420	Ca2	21942141	21949559	0.886067	3.51415	6.81486	5.52339e-07	7.12914e-06	6.06302	PREDICTED: nuclear pore complex protein NUP133 isoform X1 n_2 Tax_Cicer arietinum RepID_UPI000640F676	AT2G05120.1	Nucleoporin, Nup133/Nup155-like	Medtr5g097260.1	Nup133/Nup155-like nucleoporin
Ca30428	Ca2	21952004	21964399	-0.686926	4.50524	-6.52583	1.08664e-06	1.1897e-05	5.29863	PREDICTED: calcium-transporting ATPase 12 - plasma membrane-type-like n_1 Tax_Cicer arietinum RepID_UPI00064117E6	AT5G20250.3	Raffinose synthase family protein	Medtr5g097270.1	cation-transporting ATPase plant
Ca30431	Ca2	22034545	22036939	-0.430071	3.82269	-4.98305	4.67357e-05	0.000233984	1.57337	Putative serine/threonine-protein kinase WNK11 n_11 Tax_Papilionoideae RepID_A0A0B2SQW0_GLYSO	AT5G55560.1	Protein kinase superfamily protein	Medtr0283s0050.1	Serine/Threonine-kinase WNK11-like protein
Ca30439	Ca2	22056410	22059887	0.93417	4.29978	6.30037	1.85505e-06	1.79918e-05	4.77908	PREDICTED: 50S ribosomal protein L3-2 - chloroplastic n_1 Tax_Cicer arietinum RepID_UPI00032AB552	AT3G17465.1	ribosomal protein L3 plastid	Medtr1g093060.1	50S ribosomal protein L3P
Ca30451	Ca2	22085866	22090713	0.660638	4.94258	6.53555	1.06202e-06	1.16693e-05	5.31545	PREDICTED: uncharacterized WD repeat-containing protein C17D11.16-like n_1 Tax_Cicer arietinum RepID_UPI00032A6F70	AT4G18905.1	Transducin/WD40 repeat-like superfamily	Medtr5g097870.1	transducin/WD-like repeat-protein
Ca30448	Ca2	22119114	22120277	4.04693	2.12661	6.90361	4.49641e-07	6.20132e-06	6.47876	Putative uncharacterized protein n_2 Tax_Cicer arietinum RepID_O65745_CICAR			#N/A	#N/A
Ca30450	Ca2	22160894	22164696	1.08224	2.89271	10.3836	3.17938e-10	4.97891e-08	13.5595	PREDICTED: RPM1-interacting protein 4-like n_1 Tax_Cicer arietinum RepID_UPI00032A5C95	AT5G55850.2	RPM1-interacting protein 4 (RIN4)	Medtr5g098300.1	transmembrane protein%2C putative
Ca30452	Ca2	22165566	22170244	1.01208	3.99322	5.88203	5.08025e-06	3.98883e-05	3.78393	Acetoacetyl-CoA thiolase n_6 Tax_Papilionoideae RepID_D0EUY6_MEDSA	AT5G48230.1	acetoacetyl-CoA thiolase	Medtr0449s0040.1	peroxisomal acetoacetyl-coenzyme A thiolase
Ca30455	Ca2	22268410	22272630	0.6848	7.19072	4.8462	6.582e-05	0.000310811	1.1749	PREDICTED: oxygen-dependent coproporphyrinogen-III oxidase - chloroplastic n_1 Tax_Cicer arietinum RepID_UPI00032A8328	AT4G03205.1	Coproporphyrinogen III oxidase	Medtr5g098800.1	coproporphyrinogen III oxidase
Ca30477	Ca2	22283444	22284844	-0.97858	4.58638	-5.11343	3.37544e-05	0.000179386	1.85218	Glycosyltransferase n_1 Tax_Cicer arietinum RepID_A0A067XTA2_CICAR	AT3G21760.1	UDP-Glycosyltransferase superfamily	Medtr5g098930.1	UDP-glucose flavonoid 3-O-glucosyltransferase
Ca30479	Ca2	22431167	22434791	-0.850855	5.38018	-8.67485	9.19641e-09	4.36829e-07	10.1	PREDICTED: chloride channel protein CLC-e n_1 Tax_Cicer arietinum RepID_UPI00032A5AF3	AT4G35440.1	chloride channel	Medtr5g099290.3	ClC chloride channel family protein
Ca30488	Ca2	22488100	22494133	0.690759	7.42514	7.35452	1.60602e-07	2.99927e-06	7.21403	Pyruvate dehydrogenase E1 component subunit beta - mitochondrial n_3 Tax_Papilionoideae RepID_A0A0B2QV25_GLYSO	AT5G50850.1	Transketolase family protein	Medtr7g005380.2	pyruvate dehydrogenase E1 beta subunit
Ca30490	Ca2	22519043	22524115	-0.858769	1.56953	-5.26682	2.30473e-05	0.000132075	2.63387	PREDICTED: 125 kDa kinesin-related protein-like n_1 Tax_Cicer arietinum RepID_UPI00064177DC	AT3G61520.1	Pentatricopeptide repeat (PPR) superfamily	Medtr8g098755.1	PPR containing plant-like protein
Ca30582	Ca2	24943952	24952585	-1.05769	6.20463	-7.37402	1.53698e-07	2.90223e-06	7.26234	PREDICTED: pheophytinase - chloroplastic n_1 Tax_Cicer arietinum RepID_UPI00032A8A74	AT5G19850.1	alpha/beta-Hydrolases superfamily protein	Medtr5g056200.1	alpha/beta fold hydrolase
Ca30605	Ca2	25516188	25522240	1.28552	2.21062	5.86319	5.31833e-06	4.12076e-05	3.98161	Plasma-membrane choline transporter family protein n_2 Tax_Papilionoideae RepID_G7JYE2_MEDTR	AT1G25500.3	Plasma-membrane choline transporter	Medtr5g054780.1	plasma-membrane choline transporter family protein
Ca30620	Ca2	25687748	25696193	-1.60687	3.08677	-5.42191	1.56958e-05	9.62566e-05	2.75778	Transmembrane amino acid transporter family protein n_3 Tax_Papilionoideae RepID_G7JYD9_MEDTR	AT1G25530.1	Transmembrane amino acid transporter	Medtr5g054730.1	transmembrane amino acid transporter family protein
Ca30659	Ca2	26392385	26398033	-1.01957	3.73552	-7.29593	1.83314e-07	3.26593e-06	7.13839	PREDICTED: random slug protein 5-like n_1 Tax_Cicer arietinum RepID_UPI00032A5641	AT1G22180.3	Sec14p-like phosphatidylinositol transfer	Medtr5g062310.3	Sec14p-like phosphatidylinositol transfer family protein
Ca30666	Ca2	26636758	26643099	-1.80777	9.14991	-8.85628	6.32097e-09	3.47529e-07	10.4433	Nitrate reductase n_2 Tax_Papilionoideae RepID_E7ELN7_MEDTR	AT1G77760.1	nitrate reductase 1	Medtr5g059820.1	nitrate reductase [NADH]-like protein
Ca30737	Ca2	28140798	28151332	2.00586	2.21262	5.86091	5.34783e-06	4.13943e-05	4.02883	PREDICTED: uncharacterized protein At3g06530-like n_1 Tax_Cicer arietinum RepID_UPI00032ABA0A	AT3G06530.2	ARM repeat superfamily protein	Medtr5g092370.1	U3 small nucleolar RNA-associated protein
Ca30747	Ca2	28211779	28219550	-0.604145	2.11884	-5.02291	4.23065e-05	0.000215621	1.93492	No Hits	AT2G37400.1	Tetratricopeptide repeat (TPR)-like	Medtr8g098755.1	PPR containing plant-like protein
Ca30756	Ca2	28297217	28299618	-1.12445	4.70679	-5.39958	1.65866e-05	0.000100591	2.55591	Actin-97 n_10 Tax_Mesangiospermae RepID_B4F989_MAIZE	AT3G12110.1	actin-11	Medtr6g004000.1	actin-97
Ca30751	Ca2	28314300	28316897	0.338842	6.27849	5.78257	6.47233e-06	4.80788e-05	3.49716	Pyruvate kinase n_2 Tax_Pentapetalae RepID_A0A072U4Q0_MEDTR	AT5G08570.1	Pyruvate kinase family protein	Medtr6g004020.1	pyruvate kinase family protein
Ca30758	Ca2	28325206	28334717	0.486263	3.74866	5.40162	1.65029e-05	0.000100163	2.62191	Katanin p80 WD40 repeat-containing subunit B1 homolog n_3 Tax_Papilionoideae RepID_A0A072U4U0_MEDTR	AT5G23430.2	Transducin/WD40 repeat-like superfamily	Medtr6g004040.1	katanin p80 WD40 repeat subunit B1-like protein
Ca30759	Ca2	28360098	28364137	0.749233	4.29639	6.32982	1.72929e-06	1.70203e-05	4.84821	PREDICTED: U2 small nuclear ribonucleoprotein A'''' n_1 Tax_Cicer arietinum RepID_UPI00032A5A6E	AT1G09760.1	U2 small nuclear ribonucleoprotein	Medtr6g004180.2	U2 small nuclear ribonucleoprotein A
Ca30774	Ca2	28422946	28428692	-0.415087	5.74655	-6.41919	1.39837e-06	1.43931e-05	5.03417	PREDICTED: uncharacterized protein LOC101502703 n_1 Tax_Cicer arietinum RepID_UPI00032A9F97	AT5G14460.1	Pseudouridine synthase family protein	Medtr6g004400.2	tRNA pseudouridine synthase B
Ca30765	Ca2	28441644	28445702	-0.634877	4.61481	-6.22874	2.2013e-06	2.058e-05	4.58391	PREDICTED: serine/threonine-protein kinase HT1 n_1 Tax_Cicer arietinum RepID_UPI00032ABB12	AT3G27560.1	Protein kinase superfamily protein	Medtr6g004440.1	Serine/Threonine-kinase HT1-like protein
Ca30762	Ca2	28446219	28450258	3.22599	0.504602	6.37536	1.55173e-06	1.56659e-05	5.25287	PREDICTED: uncharacterized protein LOC101503999 n_1 Tax_Cicer arietinum RepID_UPI00032A7DCF	AT3G27550.1	RNA-binding CRS1 / YhbY (CRM) domain	Medtr6g004480.1	CRS1/YhbY (CRM) domain protein
Ca30780	Ca2	28540490	28547016	-0.446427	4.01217	-6.0955	3.03107e-06	2.65649e-05	4.29393	PREDICTED: zinc finger CCCH domain-containing protein 41 n_1 Tax_Cicer arietinum RepID_UPI00032AAAE7	AT3G27700.2	zinc finger (CCCH-type) family protein	Medtr6g004970.1	zinc finger CCCH domain protein
Ca30779	Ca2	28557517	28561930	-1.53816	2.77485	-5.93585	4.45807e-06	3.60965e-05	4.12193	PREDICTED: galactinol--sucrose galactosyltransferase n_1 Tax_Cicer arietinum RepID_UPI00032A627E	AT5G40390.1	Raffinose synthase family protein	Medtr6g004880.1	raffinose synthase or seed inhibition protein
Ca30794	Ca2	28580161	28607737	0.953572	5.67985	7.50196	1.15359e-07	2.37792e-06	7.54987	Uncharacterized protein n_1 Tax_Glycine max RepID_K7KNP5_SOYBN	AT5G40480.1	embryo defective 3012	Medtr6g004840.1	embryo defective 3012 protein
Ca30809	Ca2	28682076	28690591	3.88259	1.23099	7.21243	2.2152e-07	3.73556e-06	7.12512	Uncharacterized protein n_1 Tax_Phaseolus vulgaris RepID_V7C0V9_PHAVU	AT5G14580.1	polyribonucleotide nucleotidyltransferase,	Medtr6g005460.1	polyribonucleotide nucleotidyltransferase
Ca30802	Ca2	28714199	28718452	-1.58024	6.20363	-6.62585	8.58785e-07	9.81698e-06	5.52662	PREDICTED: phosphoenolpyruvate/phosphate translocator 2 - chloroplastic-like n_1 Tax_Cicer arietinum RepID_UPI00032AAD45	AT3G01550.1	phosphoenolpyruvate (pep)/phosphate	Medtr6g005480.1	plastid phosphate translocator
Ca30808	Ca2	28724133	28729628	0.651519	6.76943	5.26688	2.30438e-05	0.000132075	2.22477	PREDICTED: DEAD-box ATP-dependent RNA helicase 46 n_1 Tax_Cicer arietinum RepID_UPI0006412D97	AT5G14610.2	DEAD box RNA helicase family protein	Medtr6g005550.1	DEAD-box ATP-dependent RNA helicase-like protein
Ca30807	Ca2	28732215	28739367	-0.666239	3.29304	-5.93453	4.47235e-06	3.61738e-05	3.97575	PREDICTED: DNA (cytosine-5)-methyltransferase DRM2 n_1 Tax_Cicer arietinum RepID_UPI00032A832C	AT5G14620.1	domains rearranged methyltransferase	Medtr6g005580.1	DNA (cytosine-5)-methyltransferase DRM1/2
Ca30815	Ca2	28797423	28809130	0.710227	4.10578	5.20525	2.68569e-05	0.00014952	2.11217	PREDICTED: ATPase family AAA domain-containing protein 3-B-like n_1 Tax_Cicer arietinum RepID_UPI00032A5C1C	AT1G20300.1	Pentatricopeptide repeat (PPR) superfamily	Medtr3g114700.1	PPR containing plant-like protein
Ca30819	Ca2	28809989	28812245	-0.613294	4.08758	-5.45118	1.46009e-05	9.0744e-05	2.7129	PREDICTED: universal stress protein A-like protein n_1 Tax_Cicer arietinum RepID_UPI00032A9B04	AT5G14680.1	Adenine nucleotide alpha hydrolases-like	Medtr6g006190.1	universal stress family protein
Ca30816	Ca2	28822120	28826611	1.18748	3.30636	7.7974	5.99605e-08	1.49608e-06	8.31437	PREDICTED: tetraketide alpha-pyrone reductase 2 n_1 Tax_Cicer arietinum RepID_UPI00032A5C4D	AT5G14700.1	NAD(P)-binding Rossmann-fold superfamily	Medtr6g406250.1	cinnamoyl-CoA reductase
Ca30827	Ca2	28913006	28917733	-0.768019	7.99728	-9.15255	3.4585e-09	2.38278e-07	11.0815	Trypsin-like serine protease n_2 Tax_Papilionoideae RepID_G7KIR6_MEDTR	AT3G27925.1	DegP protease 1	Medtr6g007030.1	trypsin-like serine protease
Ca30821	Ca2	28956348	28958724	2.09383	8.66162	5.32619	1.98914e-05	0.00011679	2.33422	Uncharacterized protein n_3 Tax_Papilionoideae RepID_G7KKH6_MEDTR	AT1G23740.1	Oxidoreductase, zinc-binding dehydrogenase	Medtr6g012170.1	zinc-binding dehydrogenase family oxidoreductase
Ca30832	Ca2	28973014	28976358	1.95607	5.70214	8.19119	2.55233e-08	8.7764e-07	9.0722	Formate dehydrogenase n_5 Tax_Papilionoideae RepID_B6VPZ9_LOTJA	AT5G14780.1	formate dehydrogenase	Medtr6g007170.1	D-glycerate dehydrogenase/hydroxypyruvate reductase
Ca30831	Ca2	29048335	29056962	0.597791	4.21978	6.49727	1.16243e-06	1.25472e-05	5.24808	Metal-dependent phosphohydrolase n_3 Tax_Papilionoideae RepID_A0A072U697_MEDTR	AT1G18880.1	Major facilitator superfamily protein	Medtr4g107510.1	peptide/nitrate transporter
Ca30830	Ca2	29062222	29066728	-0.850414	2.99574	-7.52915	1.08563e-07	2.28715e-06	7.7357	Serine/Threonine-kinase HT1-like protein n_1 Tax_Medicago truncatula RepID_A0A072U6Y5_MEDTR	AT3G01490.1	Protein kinase superfamily protein	Medtr6g007603.1	Serine/Threonine-kinase HT1-like protein
Ca30847	Ca2	29113811	29117241	-2.31627	5.29324	-13.8894	8.94035e-13	2.19061e-09	19.3599	Homeobox associated leucine zipper protein n_3 Tax_Papilionoideae RepID_A0A072U6Z4_MEDTR	AT3G01470.1		Medtr6g007647.2	homeobox associated leucine zipper protein
Ca30861	Ca2	29338816	29340140	1.5114	3.45753	5.44207	1.4933e-05	9.24699e-05	2.77877	PREDICTED: peroxidase 63 n_1 Tax_Cicer arietinum RepID_UPI00032A6940	AT5G40150.1	Peroxidase superfamily protein	Medtr6g008075.1	peroxidase family protein
Ca30875	Ca2	29363487	29364650	3.21863	1.95094	5.78474	6.43815e-06	4.78947e-05	3.87356	PREDICTED: zinc finger AN1 domain-containing stress-associated protein 12 n_1 Tax_Cicer arietinum RepID_UPI00032AD150	AT3G28210.1	zinc finger (AN1-like) family	Medtr6g008210.1	zinc finger AN1 domain stress-associated protein
Ca30872	Ca2	29378021	29385353	-0.61714	6.0834	-5.04299	4.02372e-05	0.000206738	1.66747	PREDICTED: chloroplastic group IIA intron splicing facilitator CRS1 - chloroplastic isoform X1 n_2 Tax_Cicer arietinum RepID_UPI00032A4E88	AT3G01370.1	CRM family member 2	Medtr6g008410.1	group IIA intron splicing facilitator CRS1
Ca30877	Ca2	29393809	29407574	-1.17749	7.4518	-6.45756	1.27686e-06	1.34316e-05	5.1189	PREDICTED: cytochrome P450 82A3-like n_1 Tax_Prunus mume RepID_UPI00046DD720	AT4G31970.1	cytochrome P450, family 82,	Medtr6g008500.1	cytochrome P450 family 82 protein
Ca30881	Ca2	29411194	29423169	-1.59551	3.82447	-9.60856	1.39753e-09	1.35286e-07	12.0356	Peptide/nitrate transporter plant-like protein n_2 Tax_Papilionoideae RepID_G7KJG0_MEDTR	AT5G14940.1	Major facilitator superfamily protein	Medtr6g008690.1	peptide/nitrate transporter plant-like protein
Ca30879	Ca2	29429513	29435200	-0.745272	6.65798	-5.8041	6.14127e-06	4.60824e-05	3.55053	Glucose-1-phosphate adenylyltransferase family protein n_2 Tax_Papilionoideae RepID_G7KJH0_MEDTR	AT1G74910.2	ADP-glucose pyrophosphorylase family	Medtr6g008840.1	glucose-1-phosphate adenylyltransferase family protein
Ca30892	Ca2	29525183	29534481	-0.527618	7.23059	-6.14394	2.69773e-06	2.41297e-05	4.3735	Glucose-6-phosphate isomerase n_8 Tax_Papilionoideae RepID_G7KJZ8_MEDTR	AT5G42740.1	Sugar isomerase (SIS) family protein	Medtr6g009330.1	glucose-6-phosphate isomerase
Ca30890	Ca2	29555162	29559783	0.853358	4.01866	7.92037	4.5821e-08	1.24703e-06	8.51705	PREDICTED: uncharacterized protein LOC101503254 n_1 Tax_Cicer arietinum RepID_UPI00032A8D58			Medtr6g009400.1	rRNA methyltransferase YlbH-like protein%2C putative
Ca30885	Ca2	29574300	29578763	-0.470904	4.92388	-7.70233	7.39206e-08	1.73941e-06	7.99878	PREDICTED: uncharacterized protein LOC101503571 n_1 Tax_Cicer arietinum RepID_UPI00032A9FA9	AT1G10410.1	Protein of unknown function (DUF1336)	Medtr6g009410.2	plant/F14N23-31 protein
Ca30902	Ca2	29771290	29775622	-0.715812	2.86078	-4.93852	5.22392e-05	0.000257326	1.59446	PREDICTED: probable receptor-like protein kinase At5g15080 n_1 Tax_Cicer arietinum RepID_UPI00032A571D	AT3G28690.1	Protein kinase superfamily protein	Medtr6g011330.1	receptor-like kinase plant
Ca30921	Ca2	29966282	29969859	-0.433345	4.12246	-5.89634	4.90665e-06	3.88041e-05	3.80271	Uncharacterized protein n_9 Tax_Papilionoideae RepID_I1N643_SOYBN	AT1G26830.1	cullin	Medtr6g011700.1	cullin 3B
Ca30920	Ca2	29973782	29981615	1.01938	3.39091	5.72404	7.46716e-06	5.33942e-05	3.45964	PREDICTED: thyroid adenoma-associated protein homolog n_1 Tax_Cicer arietinum RepID_UPI00032AC551	AT3G55160.1	unknown protein; EXPRESSED IN: 11 plant	Medtr6g011760.1	death receptor interacting protein%2C putative
Ca30934	Ca2	30181275	30183137	-2.27692	3.2025	-9.64149	1.31034e-09	1.29301e-07	12.1425	Expansin A10 n_2 Tax_Papilionoideae RepID_G7KKW0_MEDTR	AT1G69530.3		Medtr7g011060.1	expansin A10
Ca30946	Ca2	30316372	30319555	-0.915199	2.69518	-5.12553	3.27515e-05	0.000175213	2.08451	Pectinesterase n_2 Tax_Papilionoideae RepID_G7KKY7_MEDTR	AT3G29090.1	pectin methylesterase	Medtr6g012800.1	pectinesterase
Ca30945	Ca2	30340716	30346909	0.482588	3.79361	5.12327	3.29365e-05	0.000175811	1.92966	ERD (Early-responsive to dehydration stress) family protein n_3 Tax_Papilionoideae RepID_G7KLA3_MEDTR	AT3G01100.1	hypothetical protein 1	Medtr6g012870.2	ERD (early-responsive to dehydration stress) family protein
Ca30956	Ca2	30425397	30426106	0.999803	5.01222	6.2308	2.19047e-06	2.05289e-05	4.5884	Uncharacterized protein n_2 Tax_Phaseolus angularis RepID_A0A0L9TTZ2_PHAAN	AT5G03850.1	Nucleic acid-binding, OB-fold-like	Medtr6g013210.1	40S ribosomal protein S28-1
Ca30955	Ca2	30473780	30477563	-1.43424	6.948	-8.1197	2.97582e-08	9.76309e-07	8.91763	DUF4336 domain protein n_3 Tax_Papilionoideae RepID_G7KLT0_MEDTR	AT3G01060.3	unknown protein; Has 35333 Blast hits	Medtr6g013750.1	DUF4336 domain protein
Ca30966	Ca2	30487386	30490165	-0.998682	1.6028	-7.74692	6.69983e-08	1.60906e-06	8.33823	PREDICTED: uncharacterized protein LOC101502289 n_1 Tax_Cicer arietinum RepID_UPI00032ABF1F	AT5G39380.1	Plant calmodulin-binding protein-related	Medtr6g013485.2	plant calmodulin-binding-like protein
Ca30972	Ca2	30505872	30512831	0.765093	7.76645	7.30402	1.79992e-07	3.22741e-06	7.09446	Chaperone protein ClpB3 n_2 Tax_Papilionoideae RepID_G7KLS1_MEDTR	AT5G15450.1	casein lytic proteinase	Medtr6g013660.1	chaperone protein ClpB3
Ca30978	Ca2	30628840	30633979	2.56781	2.31366	7.75943	6.51788e-08	1.5749e-06	8.35834	PREDICTED: ribosome biogenesis protein WDR12 homolog n_1 Tax_Cicer arietinum RepID_UPI00032A9D0F	AT5G15550.1	Transducin/WD40 repeat-like superfamily	Medtr7g099170.1	transducin/WD40 repeat protein
Ca30989	Ca2	30769415	30776053	-0.558573	4.55863	-5.53952	1.17433e-05	7.59144e-05	2.90504	Disease resistance protein (TIR-NBS-LRR class) n_2 Tax_Medicago truncatula RepID_A0A072U6R9_MEDTR	AT5G36930.1	Disease resistance protein (TIR-NBS-LRR	Medtr7g091540.1	TIR-NBS-LRR class disease resistance protein
Ca31007	Ca2	30906410	30913869	0.667596	5.71484	8.99359	4.77293e-09	2.89337e-07	10.763	Sugar porter (SP) family MFS transporter n_2 Tax_Papilionoideae RepID_A0A072U7Q1_MEDTR	AT5G16150.3	plastidic GLC translocator	Medtr6g018790.1	sugar porter (SP) family MFS transporter
Ca31009	Ca2	30950027	30956723	0.741497	4.76267	9.14445	3.51543e-09	2.40038e-07	11.0764	PREDICTED: choline/ethanolaminephosphotransferase 1 n_2 Tax_Cicer arietinum RepID_UPI00032AAE97	AT1G13560.1	aminoalcoholphosphotransferase	Medtr6g018970.1	aminoalcoholphosphotransferase
Ca31021	Ca2	31012489	31017623	-0.405385	5.3962	-5.00812	4.38982e-05	0.000222473	1.57597	Uncharacterized protein n_2 Tax_Eucalyptus grandis RepID_A0A059AQ38_EUCGR	AT4G35860.2	GTP-binding	Medtr6g021790.1	small GTPase family RAB protein
Ca31016	Ca2	31029682	31055315	1.6371	11.0588	7.79984	5.96403e-08	1.49296e-06	8.1033	Elongation factor 1-alpha n_30 Tax_Streptophyta RepID_A0A0D3FEJ1_9ORYZ	AT5G60390.3	GTP binding Elongation factor Tu family	Medtr1g095650.2	GTP-binding elongation factor Tu family protein
Ca31040	Ca2	31194405	31200177	-0.421003	4.0226	-4.97287	4.79406e-05	0.000239	1.53059	Protein phosphatase 2A regulatory B subunit family protein n_2 Tax_Papilionoideae RepID_A0A072U7U5_MEDTR	AT3G26020.2	Protein phosphatase 2A regulatory B	Medtr6g022720.1	protein phosphatase 2A regulatory B subunit family protein
Ca31037	Ca2	31231902	31235640	0.737357	4.44359	6.73188	6.70077e-07	8.1534e-06	5.80272	PREDICTED: plant UBX domain-containing protein 1 isoform X1 n_2 Tax_Cicer arietinum RepID_UPI00032ACE6F			Medtr0531s0010.1	tether containing UBX domain for GLUT4-like protein
Ca31038	Ca2	31245064	31259486	-0.644606	6.36481	-6.27928	1.9508e-06	1.87657e-05	4.70277	Glucose-6-phosphate 1-dehydrogenase n_4 Tax_Papilionoideae RepID_A0A072U7V2_MEDTR	AT3G27300.3	glucose-6-phosphate dehydrogenase	Medtr7g029555.1	hypothetical protein
Ca31046	Ca2	31351324	31363337	0.548289	7.59627	6.49297	1.17429e-06	1.26395e-05	5.20667	Cytochrome c1 - heme protein n_4 Tax_Papilionoideae RepID_G7KN99_MEDTR	AT3G27240.1	Cytochrome C1 family	Medtr6g023230.1	cytochrome c1%2C heme protein
Ca31045	Ca2	31368446	31375509	0.52452	6.39293	4.8537	6.45952e-05	0.000306569	1.19506	PREDICTED: ribulose-1 -5 bisphosphate carboxylase/oxygenase large subunit N-methyltransferase - chloroplastic n_1 Tax_Cicer arietinum RepID_UPI00032ABB87	AT5G14260.2	Rubisco methyltransferase family protein	Medtr6g023320.1	rubisco methyltransferase family protein
Ca31044	Ca2	31378253	31385210	-0.336276	5.31707	-4.8501	6.51803e-05	0.000308457	1.18184	PREDICTED: COP9 signalosome complex subunit 3 n_1 Tax_Cicer arietinum RepID_UPI00032AB1D6	AT5G14250.1	Proteasome component	Medtr6g023350.1	COP9 signalosome complex subunit-like protein
Ca31066	Ca2	31662694	31665683	1.43784	3.92328	7.65364	8.23218e-08	1.86259e-06	7.94142	PREDICTED: mitochondrial import receptor subunit TOM20-like n_1 Tax_Cicer arietinum RepID_UPI00032A6441	AT1G27390.1	translocase outer membrane 20-2	Medtr6g024140.1	plant-specific import receptor subunit TOM20
Ca31067	Ca2	31669244	31673684	0.415518	5.35867	5.12354	3.2915e-05	0.00017578	1.86384	Proteasome subunit alpha type n_3 Tax_Papilionoideae RepID_A0A0S3T8Y3_PHAAN	AT2G27020.1	20S proteasome alpha subunit G1	Medtr6g024135.1	20S proteasome subunit alpha
Ca31071	Ca2	31674466	31677085	-0.607764	3.2994	-7.02401	3.40697e-07	5.05918e-06	6.555	DNA-directed RNA polymerase II subunit RPB7 n_6 Tax_Phaseoleae RepID_RPB7_SOYBN	AT5G59180.1	DNA-directed RNA polymerase II	Medtr4g096810.1	DNA-directed RNA polymerase II subunit Rpb7
Ca31077	Ca2	31699400	31701727	-0.931533	5.14906	-6.93648	4.16768e-07	5.85396e-06	6.25221	PREDICTED: L-2-hydroxyglutarate dehydrogenase - mitochondrial n_1 Tax_Cicer arietinum RepID_UPI00032AB92D	AT3G56840.1	FAD-dependent oxidoreductase family	Medtr6g026730.1	FAD-dependent oxidoreductase
Ca31080	Ca2	31742408	31754536	-0.618747	3.47625	-6.68308	7.51001e-07	8.82902e-06	5.74274	PREDICTED: cleavage stimulation factor subunit 77 isoform X1 n_2 Tax_Cicer arietinum RepID_UPI0006416B5B	AT1G17760.1	Tetratricopeptide repeat	Medtr6g026900.2	cleavage stimulation factor
Ca31108	Ca2	32128298	32133918	-0.489393	8.77596	-5.35034	1.87362e-05	0.000111506	2.39447	PREDICTED: uncharacterized protein LOC101497856 n_1 Tax_Cicer arietinum RepID_UPI00032AB015			Medtr6g017260.1	thylakoid membrane slr0575-like protein
Ca31148	Ca2	32544357	32546233	0.914165	1.83662	5.33895	1.92724e-05	0.000113943	2.77754	PREDICTED: uncharacterized protein LOC101501148 n_1 Tax_Cicer arietinum RepID_UPI00032A687F	AT5G41270.1	CONTAINS InterPro DOMAIN/s: RNAse P,	Medtr0768s0010.1	RNase P Rpr2/Rpp21 subunit domain protein
Ca31145	Ca2	32736918	32740812	5.86156	0.75434	7.21148	2.21996e-07	3.73945e-06	6.91616	PREDICTED: proline dehydrogenase 2 - mitochondrial-like n_1 Tax_Cicer arietinum RepID_UPI00032A93A5	AT5G38710.1	Methylenetetrahydrofolate reductase	Medtr6g016640.1	proline dehydrogenase
Ca31180	Ca2	32890050	32893938	1.18049	3.76843	6.26403	2.02315e-06	1.92678e-05	4.72863	NSP-interacting kinase-like protein n_2 Tax_Papilionoideae RepID_A0A072U7V9_MEDTR	AT5G16000.1	NSP-interacting kinase 1	Medtr6g016495.1	NSP-interacting kinase-like protein
Ca31183	Ca2	32950593	32954644	-0.856412	7.45562	-6.51884	1.10471e-06	1.20517e-05	5.26926	PREDICTED: ATP sulfurylase 2 n_1 Tax_Cicer arietinum RepID_UPI00032AD054	AT1G19920.1	Pseudouridine synthase/archaeosine	Medtr6g016335.1	ATP sulfurylase
Ca31198	Ca2	33138434	33139531	2.4682	4.86989	12.0539	1.65571e-11	7.97413e-09	16.4584	PREDICTED: proline-rich protein 4 n_1 Tax_Cicer arietinum RepID_UPI00032A82A0	AT5G15780.1	Pollen Ole e 1 allergen and extensin	Medtr6g015995.1	pollen Ole e I family allergens
Ca31207	Ca2	33245002	33251604	0.596428	4.20051	5.42763	1.54755e-05	9.52889e-05	2.65014	PREDICTED: probable tRNA (guanine(26)-N(2))-dimethyltransferase 1 isoform X1 n_3 Tax_Cicer arietinum RepID_UPI00032AC68D	AT3G02320.1	N2,N2-dimethylguanosine tRNA methyltransferase	Medtr6g015885.1	N(2)%2CN(2)-dimethylguanosine tRNA methyltransferase%2C putative
Ca31208	Ca2	33283869	33286284	0.818324	3.72227	6.18531	2.44268e-06	2.23583e-05	4.54327	PREDICTED: nonsense-mediated mRNA decay protein 2 n_1 Tax_Cicer arietinum RepID_UPI00032AA9F7	AT3G02220.1	unknown protein; CONTAINS InterPro	Medtr6g015855.1	DUF2039 family protein
Ca31230	Ca2	33521082	33524022	-2.58097	5.5366	-6.87997	4.74916e-07	6.43387e-06	6.12453	PREDICTED: uncharacterized protein LOC101503941 isoform X1 n_2 Tax_Cicer arietinum RepID_UPI00032AB325			Medtr6g018690.1	hypothetical protein
Ca31237	Ca2	33651253	33654836	0.541116	3.28031	4.98464	4.65502e-05	0.000233361	1.64691	PREDICTED: uncharacterized protein DDB_G0275933-like n_2 Tax_Cicer arietinum RepID_UPI00032A725A	AT5G16060.1	Cytochrome c oxidase biogenesis protein	Medtr0024s0060.1	cytochrome C oxidase biogenesis Cmc1-like protein
Ca31234	Ca2	33655618	33663076	0.596435	2.85409	4.90323	5.70613e-05	0.000276976	1.51378	Chromosome condensation regulator RCC1 repeat protein n_2 Tax_Papilionoideae RepID_A0A072TUS6_MEDTR	AT5G16040.1	Regulator of chromosome condensation	Medtr0024s0070.1	chromosome condensation regulator RCC1 repeat protein
Ca31245	Ca2	33664279	33727185	-1.15202	2.93498	-5.47197	1.38704e-05	8.70164e-05	2.89947	PREDICTED: O-acyltransferase WSD1-like n_2 Tax_Cicer arietinum RepID_UPI00032A6BD3	AT2G44880.1	Pentatricopeptide repeat (PPR-like)	Medtr7g005870.1	PPR containing plant-like protein
Ca31243	Ca2	33745378	33749473	-1.1484	7.33536	-9.98392	6.75989e-10	7.89256e-08	12.7317	PREDICTED: uncharacterized protein LOC101511229 n_1 Tax_Cicer arietinum RepID_UPI00032AC532	AT5G38510.2	Rhomboid-related intramembrane serine	Medtr0024s0260.2	S54 family peptidase
Ca31252	Ca2	33860984	33869515	0.609882	4.9037	5.06058	3.85097e-05	0.000199528	1.71133	PREDICTED: exosome component 10 n_1 Tax_Cicer arietinum RepID_UPI00032AC36B	AT5G35910.1	Polynucleotidyl transferase, ribonuclease	Medtr6g027760.1	exosome complex exonuclease RRP6
Ca31292	Ca2	34346595	34350031	-1.0176	2.399	-5.13675	3.18493e-05	0.000171165	2.17127	PREDICTED: uncharacterized protein LOC101512896 isoform X1 n_4 Tax_Cicer arietinum RepID_UPI00032AC8C8	AT3G04030.2	Homeodomain-like superfamily protein	Medtr6g032990.1	myb-like transcription factor family protein
Ca31315	Ca2	34607113	34609368	-0.485634	5.37276	-4.81002	7.20646e-05	0.000335227	1.08244	PREDICTED: uncharacterized oxidoreductase At4g09670-like n_1 Tax_Cicer arietinum RepID_UPI00032AD29D	AT4G09670.1	Oxidoreductase family protein	Medtr6g038390.1	oxidoreductase family%2C NAD-binding rossmann fold protein
Ca31338	Ca2	35004447	35008387	1.29652	5.28386	10.9773	1.07328e-10	2.51594e-08	14.5824	Spermidine synthase n_3 Tax_Medicago RepID_G7K1F1_MEDTR	AT1G23820.1	spermidine synthase 1	Medtr5g034470.2	spermidine synthase
Ca31342	Ca2	35014144	35023401	1.56874	0.955134	5.03274	4.12805e-05	0.000211449	2.19319	PREDICTED: LOW QUALITY PROTEIN: WD repeat-containing protein DDB_G0290555-like n_1 Tax_Cicer arietinum RepID_UPI000640CC91	AT1G29320.1	Transducin/WD40 repeat-like superfamily	Medtr7g106650.1	transducin/WD-like repeat-protein
Ca31360	Ca2	35321463	35350636	-0.969043	5.60608	-7.93558	4.43282e-08	1.21724e-06	8.51366	PREDICTED: uncharacterized aarF domain-containing protein kinase At1g71810 - chloroplastic isoform X1 n_2 Tax_Cicer arietinum RepID_UPI00032A7933	AT4G23160.1	cysteine-rich RLK (RECEPTOR-like	Medtr4g079363.1	hypothetical protein
Ca31376	Ca2	35501605	35504842	-0.754259	5.12976	-7.28465	1.88055e-07	3.32137e-06	7.0548	PREDICTED: uncharacterized protein LOC101490347 n_1 Tax_Cicer arietinum RepID_UPI000640E30C	AT1G24040.2	Acyl-CoA N-acyltransferases (NAT) superfamily	Medtr5g035060.1	GNAT family acetyltransferase
Ca31375	Ca2	35516241	35517869	0.86866	2.50671	5.86002	5.35947e-06	4.14214e-05	3.91878	Uncharacterized protein n_8 Tax_Phaseoleae RepID_I1J5C7_SOYBN	AT1G70230.1	TRICHOME BIREFRINGENCE-LIKE 27	Medtr5g035070.1	Pmr5/Cas1p GDSL/SGNH-like acyl-esterase family protein
Ca31378	Ca2	35653764	35655162	-0.918859	4.35089	-6.33038	1.72699e-06	1.70203e-05	4.83895	PREDICTED: uncharacterized protein LOC101515721 n_1 Tax_Cicer arietinum RepID_UPI00032A6B75	AT1G60010.1	unknown protein; FUNCTIONS IN: molecular_function	Medtr5g035430.1	DUF4228 domain protein
Ca31383	Ca2	35691242	35694383	1.19306	0.827209	5.69499	8.01715e-06	5.63004e-05	3.75124	PREDICTED: DCC family protein At1g52590 - chloroplastic n_1 Tax_Cicer arietinum RepID_UPI00032AC51C	AT1G24095.1	Putative thiol-disulphide oxidoreductase	Medtr5g035310.1	thiol-disulfide oxidoreductase DCC
Ca31397	Ca2	35970857	35975401	-0.598466	5.68146	-6.34996	1.64832e-06	1.64886e-05	4.86821	Chaperone DnaJ domain protein n_5 Tax_Papilionoideae RepID_G7K481_MEDTR	AT1G24120.1	ARG1-like 1	Medtr5g035770.1	chaperone DnaJ domain protein
Ca31422	Ca2	36111116	36137142	-0.735285	4.51469	-7.25268	2.02178e-07	3.47842e-06	6.99298	PREDICTED: type I inositol 1 -4 -5-trisphosphate 5-phosphatase 1-like isoform X1 n_4 Tax_Cicer arietinum RepID_UPI00032AA28D	AT1G71710.2	DNAse I-like superfamily protein	Medtr6g042240.3	type I inositol-1%2C4%2C5-trisphosphate 5-phosphatase
Ca31416	Ca2	36140765	36145129	0.488967	4.25402	5.40724	1.62753e-05	9.92152e-05	2.5963	PREDICTED: uncharacterized protein LOC101502811 n_1 Tax_Cicer arietinum RepID_UPI00032A70CF	AT1G71720.1	Nucleic acid-binding proteins superfamily	Medtr1g097610.1	30S ribosomal protein S1
Ca31420	Ca2	36157061	36162081	1.32787	5.36167	8.69489	8.8214e-09	4.27752e-07	10.1443	PREDICTED: ran-binding protein 1 homolog b-like n_1 Tax_Cicer arietinum RepID_UPI00032A9948	AT1G07140.1	Pleckstrin homology (PH) domain	Medtr6g042530.1	Ran-binding protein 2%2C Ran-binding domain protein
Ca31430	Ca2	36230581	36234227	0.839907	2.03345	5.52449	1.21861e-05	7.82809e-05	3.18511	PREDICTED: transcription factor GTE6-like n_1 Tax_Cicer arietinum RepID_UPI00032A92A2	AT3G52280.1	general transcription factor group	Medtr6g033375.1	global transcription factor group protein
Ca31429	Ca2	36252015	36258687	0.548989	4.50531	5.0107	4.36164e-05	0.000221265	1.59835	PREDICTED: nucleolar complex protein 2 homolog n_1 Tax_Cicer arietinum RepID_UPI00032ABF65	AT3G55510.1	Noc2p family	Medtr6g033410.1	Noc2p family protein
Ca31434	Ca2	36383516	36386274	-1.11149	5.41938	-7.75436	6.591e-08	1.59005e-06	8.11351	PREDICTED: transcription factor MYB1R1-like n_1 Tax_Cicer arietinum RepID_UPI00032AA66E	AT1G70000.2	myb-like transcription factor family	Medtr5g037080.1	MYB-like transcription factor family protein
Ca31448	Ca2	36416939	36440253	-0.75292	4.43118	-5.81811	5.93511e-06	4.49616e-05	3.59641	PREDICTED: phospholipid-transporting ATPase 3-like isoform X1 n_2 Tax_Cicer arietinum RepID_UPI00032A7C3F	AT4G23160.1	cysteine-rich RLK (RECEPTOR-like	Medtr5g037210.1	phospholipid-transporting ATPase-like protein
Ca31447	Ca2	36457143	36460433	-1.1674	4.30757	-9.26263	2.77227e-09	2.0991e-07	11.3267	PREDICTED: transcription factor bHLH79-like n_1 Tax_Cicer arietinum RepID_UPI00032A6C94			Medtr5g037250.1	transcription factor
Ca31455	Ca2	36537347	36537593	-1.21052	1.00613	-4.65298	0.000106854	0.000462983	1.24554	Glutathione S-transferase - amino-terminal domain protein n_2 Tax_Medicago truncatula RepID_G7K8A6_MEDTR	AT1G10370.1	Glutathione	Medtr5g037380.1	glutathione S-transferase%2C amine-terminal domain protein
Ca31453	Ca2	36547427	36549632	-0.715288	5.19361	-4.95964	4.95524e-05	0.000245674	1.45526	Glutathione S-transferase - amino-terminal domain protein n_2 Tax_Medicago truncatula RepID_G7K8A6_MEDTR	AT1G10370.1	Glutathione	Medtr5g037380.1	glutathione S-transferase%2C amine-terminal domain protein
Ca31467	Ca2	36697984	36714787	-0.720304	7.30449	-6.39484	1.48154e-06	1.51269e-05	4.97582	PREDICTED: thioredoxin H2-like n_1 Tax_Cicer arietinum RepID_UPI00032AD396	AT5G39950.1	thioredoxin	Medtr5g037890.1	thioredoxin-like protein
Ca31464	Ca2	36746089	36751473	2.0168	5.99625	9.11085	3.76226e-09	2.49107e-07	11.0033	PREDICTED: protein NRT1/ PTR FAMILY 2.13-like n_1 Tax_Cicer arietinum RepID_UPI00032AD278	AT1G69870.1	nitrate transporter 1.7	Medtr5g038060.1	peptide/nitrate transporter
Ca31469	Ca2	36844531	36849212	-0.863852	3.64423	-6.38882	1.50288e-06	1.52734e-05	5.03575	PREDICTED: uncharacterized protein LOC101492605 isoform X1 n_3 Tax_Cicer arietinum RepID_UPI0006410CB0	AT1G27070.1	5'-AMP-activated protein kinase-related	Medtr5g038210.1	carbohydrate-binding module family 48 protein
Ca24222	Ca3	16597	17856	1.22776	1.7142	6.96013	3.94642e-07	5.64644e-06	6.60601	PREDICTED: myb-like protein AA n_1 Tax_Cicer arietinum RepID_UPI00032A6B95			Medtr7g005500.1	Humj1%2C putative
Ca24225	Ca3	23773	29883	-0.889949	2.23509	-4.76499	8.06755e-05	0.00036757	1.27749	PREDICTED: serine/threonine-protein phosphatase 7 long form homolog n_5 Tax_Cicer arietinum RepID_UPI00064134A1	AT3G45020.1	Ribosomal L18p/L5e family protein	Medtr7g083650.1	50S ribosomal L18-like protein
Ca24226	Ca3	30758	31907	-0.875759	2.03161	-4.79236	7.53253e-05	0.000347752	1.38575	PREDICTED: histone-lysine N-methyltransferase setd3 n_1 Tax_Cicer arietinum RepID_UPI0006414F47	AT1G24610.1	Rubisco methyltransferase family protein	Medtr8g105200.1	histone-lysine N-methyltransferase setd3-like protein
Ca24233	Ca3	246804	252992	-0.939098	4.33817	-9.65611	1.27345e-09	1.26477e-07	12.106	Transcription initiation factor TFIID subunit 10 n_15 Tax_Papilionoideae RepID_G7KSG1_MEDTR			#N/A	#N/A
Ca24262	Ca3	502514	510011	0.726781	2.57463	7.32004	1.73593e-07	3.15333e-06	7.32009	Dolichol-phosphate mannosyltransferase-like protein n_1 Tax_Medicago truncatula RepID_A0A072UUX0_MEDTR	AT1G48140.2	dolichol-phosphate mannosyltransferase-related	Medtr3g437420.2	dolichol-phosphate mannosyltransferase-like protein
Ca24263	Ca3	511489	515199	-0.804167	2.86755	-4.70858	9.29372e-05	0.000412361	1.0204	PREDICTED: uncharacterized protein LOC101492945 n_1 Tax_Cicer arietinum RepID_UPI00032ABDCF	AT3G07210.1	unknown protein; Has 97 Blast hits	Medtr7g056243.1	hypothetical protein
Ca24278	Ca3	722494	723941	-0.917116	4.26348	-6.50901	1.13064e-06	1.22907e-05	5.27178	PREDICTED: serpin-ZX-like n_1 Tax_Cicer arietinum RepID_UPI00032A8B3E	AT1G47710.1	Serine protease inhibitor (SERPIN)	Medtr3g101010.1	serpin-ZX-like protein
Ca24288	Ca3	866848	867886	-1.25952	5.29914	-7.49082	1.18265e-07	2.42151e-06	7.5228	PREDICTED: uncharacterized protein LOC101513848 n_1 Tax_Cicer arietinum RepID_UPI00032A8905	AT3G01660.1	S-adenosyl-L-methionine-dependent methyltransferases	Medtr7g032900.1	methyltransferase type 11
Ca24326	Ca3	1496926	1502016	-0.691285	6.92453	-5.67113	8.49967e-06	5.9092e-05	3.22334	Monodehydroascorbate reductase n_1 Tax_Medicago truncatula RepID_A0A072TXL0_MEDTR	AT3G27820.1	monodehydroascorbate	Medtr7g034715.1	monodehydroascorbate reductase
Ca24407	Ca3	2923116	2926591	-1.53135	6.264	-6.15726	2.6128e-06	2.35352e-05	4.40784	PREDICTED: probable leucine-rich repeat receptor-like serine/threonine-protein kinase At3g14840 n_1 Tax_Cicer arietinum RepID_UPI00032AA7D9	AT2G45340.1	Leucine-rich repeat protein kinase	Medtr7g038690.1	LRR receptor-like kinase
Ca24412	Ca3	2992483	3010676	-0.358183	6.38035	-5.15322	3.05694e-05	0.00016586	1.94328	Iron-sulfur cluster biosynthesis family protein n_1 Tax_Medicago truncatula RepID_G7L3A6_MEDTR	AT4G23160.1	cysteine-rich RLK (RECEPTOR-like	Medtr3g093120.1	SPFH domain/band 7 family protein
Ca24441	Ca3	3586237	3587521	-1.19142	0.241883	-4.52979	0.000145591	0.000596042	1.04349	PREDICTED: dof zinc finger protein DOF2.4-like n_1 Tax_Cicer arietinum RepID_UPI00032A6E5C	AT5G02460.1	Dof-type zinc finger DNA-binding family	Medtr7g059400.1	Dof domain zinc finger protein
Ca24460	Ca3	3772699	3781535	-0.403161	4.23395	-5.1476	3.09999e-05	0.000167601	1.95012	PREDICTED: FHA domain-containing protein FHA2 n_1 Tax_Cicer arietinum RepID_UPI00032AC279	AT3G07220.1	SMAD/FHA domain-containing protein	Medtr7g055873.1	transcriptional activator FHA1
Ca24470	Ca3	3802435	3807060	0.83822	5.37861	9.5972	1.42896e-09	1.36534e-07	11.9799	PREDICTED: ethylene-responsive transcription factor-like protein At4g13040 isoform X1 n_5 Tax_Cicer arietinum RepID_UPI00032A70BD	AT4G13040.1	Integrase-type DNA-binding superfamily	Medtr7g055857.1	ethylene response factor
Ca24479	Ca3	3888637	3893055	0.766702	3.89506	4.9998	4.48196e-05	0.000225944	1.61538	PREDICTED: putative G3BP-like protein n_1 Tax_Cicer arietinum RepID_UPI00032A5AFF	AT3G25150.1	Nuclear transport factor 2 (NTF2) family	Medtr7g055610.1	nuclear transport factor 2 and RNA recognition motif protein
Ca24557	Ca3	5132325	5132870	-0.987749	5.66434	-7.58136	9.66443e-08	2.10267e-06	7.72745	PREDICTED: vasodilator-stimulated phosphoprotein-like n_1 Tax_Cicer arietinum RepID_UPI00032A51A5			Medtr7g056413.1	hypothetical protein
Ca24577	Ca3	5387446	5392923	0.8519	3.49379	6.94711	4.06662e-07	5.7564e-06	6.36317	PREDICTED: translation initiation factor eIF-2B subunit delta-like isoform X1 n_2 Tax_Cicer arietinum RepID_UPI00032A5B17	AT5G38640.1	NagB/RpiA/CoA transferase-like superfamily	Medtr6g017100.2	translation initiation factor eIF-2B delta subunit
Ca24627	Ca3	6225296	6231435	-0.631863	5.29942	-6.12451	2.82669e-06	2.50488e-05	4.32446	PREDICTED: uncharacterized membrane protein At3g27390-like n_1 Tax_Cicer arietinum RepID_UPI00032A5974	AT3G27390.1	unknown protein; FUNCTIONS IN: molecular_function	Medtr7g031900.1	transmembrane protein%2C putative
Ca24711	Ca3	7305690	7313077	0.391033	4.66281	5.5996	1.01302e-05	6.7601e-05	3.05214	Uncharacterized protein n_4 Tax_Papilionoideae RepID_I1KKF7_SOYBN	AT3G51850.1	calcium-dependent protein kinase	Medtr7g068710.1	calmodulin-domain kinase CDPK protein
Ca24741	Ca3	7687836	7690987	2.13288	0.645616	5.42344	1.56366e-05	9.60273e-05	3.12728	Peroxisomal Ca-dependent solute carrier protein n_2 Tax_Papilionoideae RepID_G7L5K1_MEDTR	AT3G55640.1	Mitochondrial substrate carrier family	Medtr7g064980.1	peroxisomal Ca-dependent solute carrier protein
Ca24752	Ca3	7937328	7948345	1.72167	1.9754	7.17999	2.38484e-07	3.90119e-06	7.09548	PREDICTED: nuclear pore complex protein NUP62 n_1 Tax_Cicer arietinum RepID_UPI00032A98BC	AT2G45000.1	structural constituent of nuclear	Medtr7g045280.1	structural constituent of nuclear pore protein%2C putative
Ca24766	Ca3	8014135	8027887	1.04818	4.77911	6.92778	4.25217e-07	5.92861e-06	6.24307	Translation elongation factor EFG/EF2 protein isoform 1 n_9 Tax_rosids RepID_A0A061DWC0_THECC	AT2G45030.1	Translation elongation factor EFG/EF2	Medtr7g044770.1	translation elongation factor EF protein
Ca24768	Ca3	8056085	8056540	-1.9302	0.832865	-6.1705	2.53106e-06	2.29262e-05	4.84953	Putative ATP synthase CFi alpha subunit (Fragment) n_1 Tax_Prunus dulcis RepID_A7Y7P3_PRUDU	ATCG00120.1	ATP synthase subunit alpha	Medtr2g008350.1	ATP synthase subunit alpha
Ca24778	Ca3	8363212	8364309	-1.26287	6.3689	-8.86277	6.23726e-09	3.45648e-07	10.4943	PREDICTED: uncharacterized protein At3g28850-like n_1 Tax_Cicer arietinum RepID_UPI00032A9479	AT1G64500.1	Glutaredoxin family protein	Medtr8g099665.1	glutaredoxin (GRX) family protein
Ca24789	Ca3	8483095	8486233	-1.06759	1.15318	-6.08813	3.0854e-06	2.69356e-05	4.64592	PREDICTED: LOW QUALITY PROTEIN: G-type lectin S-receptor-like serine/threonine-protein kinase At1g11300 n_1 Tax_Cicer arietinum RepID_UPI000640EC81	AT1G11330.1	S-locus lectin protein kinase family	Medtr7g056667.1	G-type lectin S-receptor-like Serine/Threonine-kinase
Ca24786	Ca3	8512115	8521239	-0.90925	3.71729	-8.07527	3.27487e-08	1.0457e-06	8.87073	PREDICTED: pentatricopeptide repeat-containing protein At5g48730 - chloroplastic n_1 Tax_Cicer arietinum RepID_UPI00032A7D38	AT5G48730.1	Pentatricopeptide repeat (PPR) superfamily	Medtr7g056613.1	PPR containing plant-like protein
Ca24809	Ca3	8812786	8818447	-0.56642	6.09338	-5.89034	4.9787e-06	3.92319e-05	3.7598	PREDICTED: uncharacterized protein LOC101511308 isoform X2 n_1 Tax_Cicer arietinum RepID_UPI00032AB52D			Medtr7g057180.1	transmembrane protein%2C putative
Ca24850	Ca3	9397420	9403512	0.643312	6.9848	5.93494	4.46791e-06	3.6157e-05	3.86789	PREDICTED: acetyl-coenzyme A carboxylase carboxyl transferase subunit alpha - chloroplastic n_1 Tax_Cicer arietinum RepID_UPI00032A5A59	AT2G38040.2	acetyl Co-enzyme a carboxylase	Medtr7g066870.1	acetyl-CoA carboxylase%2C carboxyl transferase%2C alpha subunit
Ca24853	Ca3	9437891	9471542	-0.472518	4.01242	-4.86512	6.27738e-05	0.000299104	1.26349	PREDICTED: probable anion transporter 3 - chloroplastic n_1 Tax_Cicer arietinum RepID_UPI00032AC251	AT2G38050.1	3-oxo-5-alpha-steroid	Medtr4g064025.1	3-oxo-5-alpha-steroid 4-dehydrogenase
Ca24862	Ca3	9689220	9692056	-0.720156	2.61913	-5.57872	1.06636e-05	7.00002e-05	3.21495	PREDICTED: uncharacterized protein LOC101508957 n_1 Tax_Cicer arietinum RepID_UPI00032A7C5A			Medtr7g062260.2	far-red elongated hypocotyl protein%2C putative
Ca24861	Ca3	9732419	9733987	-1.47582	6.7843	-5.98206	3.98595e-06	3.29363e-05	3.98341	PREDICTED: uncharacterized protein LOC101510131 n_1 Tax_Cicer arietinum RepID_UPI00032ABFEA	AT5G02160.1	unknown protein; FUNCTIONS IN: molecular_function	Medtr7g062470.1	transmembrane protein%2C putative
Ca24890	Ca3	10306533	10312468	-2.56637	0.115471	-4.74113	8.56507e-05	0.000385226	1.54681	PREDICTED: kelch repeat-containing protein At3g27220-like isoform X1 n_2 Tax_Cicer arietinum RepID_UPI00032A6A20	AT1G51540.1	Galactose oxidase/kelch repeat superfamily	Medtr0018s0170.2	galactose oxidase/kelch repeat protein
Ca24938	Ca3	11366189	11376046	3.26827	0.645179	5.07237	3.7393e-05	0.000195039	2.30949	PREDICTED: triacylglycerol lipase 2 n_1 Tax_Cicer arietinum RepID_UPI00032A5D6B	AT5G14180.1	Myzus persicae-induced lipase 1	Medtr1g054775.1	endonuclease/exonuclease/phosphatase family protein
Ca24942	Ca3	11423390	11426989	-1.14489	3.14541	-9.25293	2.82666e-09	2.10896e-07	11.371	Plant U-box protein n_1 Tax_Medicago truncatula RepID_G7I5N0_MEDTR			Medtr4g065073.1	DUF688 family protein
Ca24996	Ca3	13553567	13556891	-0.733049	6.20733	-6.1397	2.72533e-06	2.43623e-05	4.36597	PREDICTED: probable plastid-lipid-associated protein 11 isoform X1 n_2 Tax_Cicer arietinum RepID_UPI00032A8B8C	AT4G00030.1	Plastid-lipid associated protein PAP	Medtr7g444820.1	plastid lipid-associated protein
Ca25001	Ca3	13706064	13707131	-1.51143	0.983058	-4.70328	9.41824e-05	0.0004173	1.37908	Uncharacterized protein n_3 Tax_Papilionoideae RepID_A0A072TY19_MEDTR			Medtr7g445390.1	zinc ion-binding protein
Ca25005	Ca3	13849235	13856152	-1.15414	7.71894	-7.56932	9.92687e-08	2.15059e-06	7.69678	PREDICTED: transcription factor UNE10 n_1 Tax_Cicer arietinum RepID_UPI00032A8573	AT4G00050.1	basic helix-loop-helix (bHLH)	Medtr7g039110.1	transcription factor
Ca25013	Ca3	13977138	13978656	-2.57822	2.5009	-9.33047	2.42091e-09	1.92853e-07	11.5679	Uncharacterized protein n_2 Tax_Papilionoideae RepID_B7FJB0_MEDTR	AT3G60550.1	cyclin p3;2	Medtr4g028060.1	cyclin p4
Ca25050	Ca3	15182697	15205392	-0.940637	5.2851	-7.61265	9.0154e-08	2.01007e-06	7.79708	PREDICTED: phosphoglucan phosphatase LSF1 - chloroplastic isoform X1 n_2 Tax_Cicer arietinum RepID_UPI00032A5BB1	AT4G23160.1	cysteine-rich RLK (RECEPTOR-like	Medtr7g034465.1	phosphoglucan phosphatase LSF1
Ca25102	Ca3	16312234	16322469	-1.24883	1.43823	-6.94001	4.13384e-07	5.82295e-06	6.57539	PREDICTED: histone-lysine N-methyltransferase setd3 n_1 Tax_Cicer arietinum RepID_UPI0006414F47	AT4G23160.1	cysteine-rich RLK (RECEPTOR-like	Medtr3g093120.1	SPFH domain/band 7 family protein
Ca25099	Ca3	16345164	16350914	-0.815781	7.20978	-5.65709	8.79727e-06	6.05282e-05	3.18658	PREDICTED: uncharacterized protein LOC101504453 n_1 Tax_Cicer arietinum RepID_UPI00032A5F3D	AT3G27110.2	Peptidase family M48 family protein	Medtr7g033405.1	M48 family peptidase
Ca25100	Ca3	16361113	16376007	-0.684997	6.78886	-5.6676	8.57356e-06	5.93545e-05	3.21427	PREDICTED: sulfite oxidase-like isoform X1 n_2 Tax_Cicer arietinum RepID_UPI00032A5043	AT4G23160.1	cysteine-rich RLK (RECEPTOR-like	Medtr7g033410.1	sulfite oxidase-like protein
Ca25164	Ca3	17941444	17949298	-2.35105	3.47404	-7.39754	1.45776e-07	2.83184e-06	7.40192	Transmembrane amino acid transporter family protein n_2 Tax_Papilionoideae RepID_G7II25_MEDTR	AT5G40780.2	lysine histidine transporter 1	Medtr2g101920.1	transmembrane amino acid transporter family protein
Ca25171	Ca3	18155397	18156153	-1.10457	0.544883	-4.75949	8.17966e-05	0.000371571	1.55982	50S ribosomal protein L16 n_181 Tax_Mesangiospermae RepID_A0A072TKH5_MEDTR	ATCG00790.1	ribosomal protein L16	Medtr4g034750.1	50S ribosomal protein L16
Ca25170	Ca3	18162249	18163934	-1.86152	4.37377	-7.17356	2.42001e-07	3.93347e-06	6.82107	Photosystem II CP47 reaction center protein n_9 Tax_Spermatophyta RepID_H6T029_9POAL	ATCG00680.1	photosystem II reaction center	Medtr4g051370.1	photosystem II CP47 chlorophyll A apoprotein
Ca25179	Ca3	18164162	18164428	-1.36355	2.24705	-5.06439	3.81447e-05	0.000197905	2.01783	Protein PsbN n_3 Tax_Mesangiospermae RepID_H8PFF5_9POAL	ATCG00700.1	photosystem II reaction center	Medtr2g062940.1	photosystem II reaction center protein N
Ca25173	Ca3	18164542	18166384	-1.71465	3.84141	-7.12892	2.67931e-07	4.19878e-06	6.74995	Cytochrome b/b6 (Fragment) n_1 Tax_Cynara cardunculus var. scolymus RepID_A0A118K2H4_CYNCS	ATCG00720.1	photosynthetic electron transfer	Medtr4g034790.1	cytochrome B(amine-terminal)/b6/petB protein
Ca25174	Ca3	18167257	18167787	-1.61149	2.86989	-5.62109	9.60958e-06	6.51569e-05	3.27722	Cytochrome b6-f complex subunit 4 n_136 Tax_Mesangiospermae RepID_A0A096XCQ6_9ROSI	ATCG00730.1	photosynthetic electron transfer	Medtr4g034790.1	cytochrome B(amine-terminal)/b6/petB protein
Ca25181	Ca3	18169511	18174662	-1.60047	1.47401	-5.39818	1.66442e-05	0.000100821	2.97178	Protein Ycf2 n_1 Tax_Cicer arietinum RepID_B5LMR5_CICAR	ATCG01280.1	Chloroplast Ycf2;ATPase, AAA	Medtr0689s0010.1	Ycf2%3B ATPase%2C AAA type%2C core protein
Ca25175	Ca3	18175761	18180341	-1.45558	2.56686	-6.54625	1.03556e-06	1.14195e-05	5.5404	Ribosomal protein S7 n_28 Tax_Mesangiospermae RepID_G7J101_MEDTR	ATCG01250.1	NADH-Ubiquinone/plastoquinone	Medtr3g035660.1	NAD(P)H-quinone oxidoreductase subunit 2
Ca25182	Ca3	18181312	18185023	-1.52274	0.75394	-5.81157	6.03044e-06	4.53915e-05	4.02362	Protein Ycf2 n_1 Tax_Cicer arietinum RepID_B5LMR5_CICAR	ATCG01280.1	Chloroplast Ycf2;ATPase, AAA	Medtr0689s0010.1	Ycf2%3B ATPase%2C AAA type%2C core protein
Ca25186	Ca3	18199621	18201476	-1.25445	0.98011	-6.04637	3.41219e-06	2.91236e-05	4.55899	Ribosomal protein S7 n_28 Tax_Mesangiospermae RepID_G7J101_MEDTR	ATCG01250.1	NADH-Ubiquinone/plastoquinone	Medtr0002s0310.1	NADH-quinone oxidoreductase protein
Ca25188	Ca3	18201477	18204716	-1.99992	3.72378	-6.93994	4.13451e-07	5.82295e-06	6.32551	Ribosomal protein S7 n_28 Tax_Mesangiospermae RepID_G7J101_MEDTR	ATCG00900.1	Ribosomal protein S7p/S5e	Medtr3g035660.1	NAD(P)H-quinone oxidoreductase subunit 2
Ca25223	Ca3	18976237	18977948	-0.862189	3.56132	-6.79349	5.80468e-07	7.37939e-06	5.9933	PREDICTED: F-box/LRR-repeat protein 4 n_1 Tax_Cicer arietinum RepID_UPI00032A5C0A	AT5G40470.1	RNI-like superfamily protein	Medtr7g033720.2	F-box/LRR protein
Ca25262	Ca3	19725574	19734426	0.772354	4.06228	5.48643	1.33845e-05	8.43838e-05	2.80581	PREDICTED: transcription factor GTE9-like n_1 Tax_Cicer arietinum RepID_UPI00032A734E	AT3G27260.1	global transcription factor group	Medtr0018s0090.2	global transcription factor group protein
Ca25311	Ca3	20804833	20813692	-1.38867	0.618171	-4.63954	0.000110522	0.000476177	1.26818	PREDICTED: uncharacterized protein LOC101499348 n_1 Tax_Cicer arietinum RepID_UPI000640D921			#N/A	#N/A
Ca25315	Ca3	20953450	20963828	-0.636157	3.35267	-5.94885	4.31968e-06	3.53438e-05	4.00285	Putative uncharacterized protein n_10 Tax_Pentapetalae RepID_D7SVM1_VITVI	AT3G27000.1	actin related protein	Medtr7g027185.3	actin-related protein ARP4
Ca25339	Ca3	21472494	21473483	0.953542	4.04591	5.19167	2.77797e-05	0.000153501	2.08257	Ribonucleoside-diphosphate reductase small chain n_6 Tax_Papilionoideae RepID_A0A072VJ25_MEDTR	AT3G27060.1	Ferritin/ribonucleotide	Medtr1g050472.1	ribonucleoside-diphosphate reductase small chain
Ca25337	Ca3	21474001	21491883	0.93041	4.15182	5.17455	2.89883e-05	0.000158916	2.03196	Ribonucleoside-diphosphate reductase small chain n_6 Tax_Papilionoideae RepID_A0A072VJ25_MEDTR	AT3G27060.1	Ferritin/ribonucleotide	Medtr1g050472.1	ribonucleoside-diphosphate reductase small chain
Ca25351	Ca3	21597435	21601986	0.824697	2.43846	4.68454	9.8717e-05	0.000433317	1.05463	Nodulin-like/MFS transporter n_2 Tax_Papilionoideae RepID_A0A072TXV1_MEDTR	AT3G01930.1	Major facilitator superfamily protein	Medtr7g029015.1	nodulin-like/MFS transporter
Ca25356	Ca3	22012526	22020948	0.944376	5.12997	9.61772	1.37269e-09	1.33728e-07	12.0205	Uncharacterized protein n_1 Tax_Phaseolus angularis RepID_A0A0L9UM47_PHAAN	AT5G20890.1	TCP-1/cpn60 chaperonin family protein	Medtr7g113470.1	TCP-1/cpn60 chaperonin family protein
Ca25415	Ca3	23560464	23562957	-1.05243	4.30249	-5.60791	9.92556e-06	6.6584e-05	3.08607	Squamosa promoter-binding-like protein n_1 Tax_Medicago truncatula RepID_A0A072TYQ4_MEDTR	AT5G50570.2	Squamosa promoter-binding	Medtr7g028740.1	squamosa promoter-binding-like protein
Ca25422	Ca3	23884092	23900225	-1.99202	0.992556	-9.32771	2.43428e-09	1.92914e-07	11.4192	PREDICTED: mitochondrial pyruvate carrier 1-like isoform X1 n_2 Tax_Cicer arietinum RepID_UPI00064143AA	AT4G23160.1	cysteine-rich RLK (RECEPTOR-like	Medtr6g472230.1	disease resistance protein (TIR-NBS-LRR class)%2C putative
Ca25442	Ca3	24503256	24508883	-0.731716	2.05368	-5.20909	2.66018e-05	0.00014844	2.40472	PREDICTED: putative pentatricopeptide repeat-containing protein At1g16830 n_1 Tax_Cicer arietinum RepID_UPI000640E5C8	AT1G16830.1	Pentatricopeptide repeat (PPR) superfamily	Medtr7g025610.1	PPR containing plant-like protein%2C putative
Ca26900	Ca3	25851583	25858017	1.44274	5.06407	9.02488	4.47858e-09	2.78604e-07	10.83	PREDICTED: pescadillo homolog n_4 Tax_Cicer arietinum RepID_UPI00032AA0C1	AT5G14520.1	pescadillo-related	Medtr7g100040.2	pescadillo-like protein
Ca26909	Ca3	25914678	25917934	-1.0441	0.860892	-4.94303	5.16537e-05	0.000254853	1.96236	Putative uncharacterized protein n_4 Tax_Lotus japonicus RepID_B5U9V8_LOTJA	ATMG00860.1	DNA/RNA polymerases superfamily	Medtr6g045307.1	IPP transferase
Ca25584	Ca3	27834658	27839907	-0.549922	4.52426	-5.15216	3.06503e-05	0.00016624	1.9482	PREDICTED: sulfoquinovosyl transferase SQD2-like n_1 Tax_Cicer arietinum RepID_UPI000640FA8B	AT5G01220.1	sulfoquinovosyldiacylglycerol 2	Medtr7g067340.1	group 1 family glycosyltransferase
Ca25588	Ca3	27905439	27909055	-1.88704	5.63009	-7.7705	6.36116e-08	1.55431e-06	8.15469	PREDICTED: glycerol-3-phosphate 2-O-acyltransferase 6-like n_1 Tax_Cicer arietinum RepID_UPI000640D57A	AT2G38110.1	glycerol-3-phosphate	Medtr7g067380.1	glycerol-3-phosphate acyltransferase
Ca25599	Ca3	27998606	28006264	-1.77207	5.1518	-7.38767	1.49049e-07	2.8601e-06	7.29085	Auxin transporter-like protein 2 n_15 Tax_rosids RepID_LAX2_MEDTR	AT2G38120.1	Transmembrane	Medtr7g067450.1	auxin influx transporter
Ca25600	Ca3	28065225	28075075	0.518611	4.55606	5.08607	3.61375e-05	0.000189679	1.78355	PREDICTED: LOW QUALITY PROTEIN: RNA polymerase II C-terminal domain phosphatase-like 2 n_1 Tax_Cicer arietinum RepID_UPI0006418438	AT5G01270.2	carboxyl-terminal domain (ctd)	Medtr7g067540.1	double-stranded RNA-binding motif protein
Ca25614	Ca3	28154898	28159108	1.70855	1.50734	5.33564	1.94308e-05	0.000114703	2.83089	PREDICTED: uncharacterized protein LOC101510339 n_1 Tax_Cicer arietinum RepID_UPI00032A4F5F	AT3G47160.1	RING/U-box superfamily protein	Medtr4g015600.3	zinc finger%2C C3HC4 type (RING finger) protein
Ca25593	Ca3	28194272	28202838	-0.796706	3.59901	-4.96355	4.90698e-05	0.000243756	1.54813	PREDICTED: alcohol dehydrogenase-like 4 n_1 Tax_Cicer arietinum RepID_UPI00032AC8D1	AT1G32780.1	GroES-like zinc-binding dehydrogenase	Medtr7g068320.1	zinc-binding alcohol dehydrogenase family protein
Ca25625	Ca3	28501588	28504781	1.50545	3.23713	9.13113	3.61125e-09	2.43322e-07	11.1324	PREDICTED: protein SCO1 homolog 1 - mitochondrial n_1 Tax_Cicer arietinum RepID_UPI00032A6AB0	AT3G08950.1	electron transport SCO1/SenC family	Medtr7g069070.1	electron transport SCO1/SenC family protein%2C putative
Ca25628	Ca3	28507065	28515347	0.93623	3.64204	5.57901	1.06561e-05	7.00002e-05	3.07955	PREDICTED: AMP deaminase-like n_1 Tax_Cicer arietinum RepID_UPI00032A9831	AT2G38280.2	AMP deaminase, putative	Medtr4g016980.1	AMP deaminase
Ca25622	Ca3	28563758	28567832	0.53731	6.03655	7.4183	1.39136e-07	2.72703e-06	7.36183	Proliferation-associated protein 2G4 n_25 Tax_Papilionoideae RepID_A0A0B2S4F2_GLYSO	AT3G51800.2	metallopeptidase	Medtr7g069390.1	proliferation-associated 2G4-like protein
Ca25651	Ca3	28573582	28601853	0.552836	4.06741	4.993	4.55885e-05	0.000229026	1.58101	Uncharacterized protein n_18 Tax_Papilionoideae RepID_I1KKH2_SOYBN	AT4G23160.1	cysteine-rich RLK (RECEPTOR-like	Medtr7g069460.2	importin-like protein
Ca25652	Ca3	28801187	28803969	1.14364	4.38691	6.78066	5.9806e-07	7.49774e-06	5.91643	40S ribosomal protein S4 n_3 Tax_rosids RepID_M5X1J7_PRUPE	AT5G07090.2	Ribosomal protein S4 (RPS4A) family	Medtr4g014590.1	40S ribosomal S4-like protein
Ca25659	Ca3	28807510	28810242	5.09283	1.05017	4.86909	6.21524e-05	0.000296791	1.8332	PREDICTED: ferritin-1 - chloroplastic-like isoform X1 n_1 Tax_Cicer arietinum RepID_UPI00032A74DC			Medtr7g069980.1	ferritin
Ca25658	Ca3	28811228	28813741	-0.69399	3.66997	-5.26312	2.32599e-05	0.000133044	2.28627	Uncharacterized protein n_7 Tax_Papilionoideae RepID_A0A0S3RTW7_PHAAN	AT3G08890.2	Protein of unknown function, DUF538	Medtr7g070000.1	DUF538 family protein
Ca25654	Ca3	28856454	28859985	-2.52866	1.07091	-4.64175	0.000109909	0.000474338	1.22458	Pmr5/Cas1p GDSL/SGNH-like acyl-esterase family protein n_3 Tax_Papilionoideae RepID_G7KT84_MEDTR	AT2G38320.1	TRICHOME BIREFRINGENCE-LIKE 34	Medtr7g070060.3	Pmr5/Cas1p GDSL/SGNH-like acyl-esterase family protein
Ca25653	Ca3	28875591	28879845	1.05916	4.51652	5.71888	7.56196e-06	5.39964e-05	3.35909	PREDICTED: probable inactive leucine-rich repeat receptor-like protein kinase At1g66830 n_1 Tax_Cicer arietinum RepID_UPI00032A92EE	AT1G67510.1	Leucine-rich repeat protein kinase	Medtr7g070200.1	receptor-like kinase
Ca25662	Ca3	28914958	28917079	1.03257	6.67462	7.93941	4.39608e-08	1.21368e-06	8.52488	Os04g0502300 protein n_15 Tax_Poaceae RepID_Q0JBY8_ORYSJ	AT3G48930.1	Nucleic acid-binding, OB-fold-like	Medtr8g076830.1	40S ribosomal protein S11-1
Ca25661	Ca3	28942513	28951619	2.05452	3.17419	7.59194	9.43979e-08	2.07147e-06	7.90693	PREDICTED: LOW QUALITY PROTEIN: nucleolar complex protein 3 homolog n_1 Tax_Cicer arietinum RepID_UPI00032A814B	AT1G79150.1	binding	Medtr7g070240.1	nucleolar complex-associated protein
Ca25680	Ca3	29154954	29170721	-2.12512	0.681228	-7.33462	1.67974e-07	3.07932e-06	7.38486	UDP-glycosyltransferase n_1 Tax_Cicer arietinum RepID_A0A067XT78_CICAR	AT2G15490.3	UDP-glycosyltransferase 73B4	Medtr7g070800.1	UDP-glucosyltransferase family protein
Ca25707	Ca3	29630711	29632736	2.53737	2.2177	6.00225	3.79589e-06	3.16393e-05	4.36757	PREDICTED: transcription factor SCREAM2-like n_1 Tax_Cicer arietinum RepID_UPI00032A93EE	AT2G40435.1	BEST Arabidopsis thaliana protein match	Medtr7g072470.1	transcription factor bHLH93-like protein
Ca25729	Ca3	29767215	29768510	-1.13373	4.82304	-5.65876	8.76142e-06	6.0363e-05	3.1986	PREDICTED: CBL-interacting serine/threonine-protein kinase 14-like n_1 Tax_Cicer arietinum RepID_UPI00032AB8FC	AT2G30360.1	SOS3-interacting	Medtr7g072605.1	CBL-interacting kinase
Ca25731	Ca3	29838256	29843819	0.565057	3.64794	5.26522	2.31392e-05	0.000132502	2.29542	Transmembrane protein - putative n_2 Tax_Papilionoideae RepID_B7FN45_MEDTR			#N/A	#N/A
Ca25760	Ca3	30124692	30127382	1.17024	5.5357	6.9919	3.668e-07	5.34815e-06	6.38239	PREDICTED: receptor-like protein kinase FERONIA n_1 Tax_Cicer arietinum RepID_UPI00032AA793	AT3G51550.1	Malectin/receptor-like protein kinase	Medtr7g073660.1	feronia receptor-like kinase
Ca25755	Ca3	30193770	30197801	-0.90339	5.75711	-8.12224	2.95957e-08	9.73476e-07	8.92218	PREDICTED: probable acetyltransferase NSI n_1 Tax_Cicer arietinum RepID_UPI00032A5019			Medtr7g073990.1	acetyltransferase NSI-like protein
Ca25758	Ca3	30234987	30240150	0.786568	4.87936	6.32704	1.7408e-06	1.70896e-05	4.81685	RNA-binding KH domain protein n_2 Tax_Papilionoideae RepID_G7KY84_MEDTR	AT2G38610.2	RNA-binding KH domain-containing protein	Medtr8g005550.1	RNA-binding KH domain protein
Ca25776	Ca3	30337484	30341076	0.840411	4.09467	9.31295	2.50701e-09	1.94643e-07	11.4376	PREDICTED: uncharacterized protein LOC101512486 n_1 Tax_Cicer arietinum RepID_UPI00032A8827	AT3G54190.1	Transducin/WD40 repeat-like superfamily	Medtr7g074450.1	transducin/WD40 repeat protein
Ca25781	Ca3	30355536	30360571	0.698398	7.89549	6.78547	5.91399e-07	7.45019e-06	5.89055	Uncharacterized protein n_10 Tax_Papilionoideae RepID_I1L6W0_SOYBN	AT1G09780.1	Phosphoglycerate mutase, 2,3-bisphosphoglycerate-independent	Medtr7g074570.2	2%2C3-bisphosphoglycerate-independent phosphoglycerate mutase
Ca25795	Ca3	30429443	30437642	0.939519	4.13643	6.48484	1.19708e-06	1.28217e-05	5.22516	PREDICTED: probable galacturonosyltransferase 7 n_1 Tax_Cicer arietinum RepID_UPI000640BCF8	AT2G38650.2	galacturonosyltransferase 7	Medtr7g074680.5	glycosyltransferase family 8 protein
Ca25802	Ca3	30621595	30624037	-0.475385	4.14544	-5.53209	1.19601e-05	7.70877e-05	2.90852	PREDICTED: pentatricopeptide repeat-containing protein At1g01970 n_1 Tax_Cicer arietinum RepID_UPI00032AB81F	AT1G01970.1	Tetratricopeptide repeat (TPR)-like	Medtr7g075010.1	PPR containing plant-like protein
Ca25801	Ca3	30678007	30678598	-1.78839	3.02245	-9.91778	7.67308e-10	8.62939e-08	12.6798	PREDICTED: uncharacterized protein LOC101502833 n_1 Tax_Cicer arietinum RepID_UPI00032A9AA5			Medtr7g075120.1	hypothetical protein
Ca25813	Ca3	30780937	30783629	0.815169	3.30749	5.68781	8.15937e-06	5.70895e-05	3.37988	PREDICTED: glutamic acid-rich protein n_1 Tax_Cicer arietinum RepID_UPI00032A8859			Medtr7g075640.1	hypothetical protein
Ca25821	Ca3	30969952	30972069	1.79191	0.968316	7.2222	2.16654e-07	3.67909e-06	7.18229	PREDICTED: ataxin-10 n_1 Tax_Cicer arietinum RepID_UPI00032A861D	AT4G00231.1	ARM repeat superfamily protein	Medtr7g075940.1	ARM repeat protein
Ca25839	Ca3	31058677	31077275	0.760786	5.27545	5.19179	2.77715e-05	0.000153501	2.0343	Methyltransferase PMT16 - putative n_4 Tax_Papilionoideae RepID_A2Q5C4_MEDTR	AT4G00740.1	S-adenosyl-L-methionine-dependent methyltransferases	Medtr7g076150.1	methyltransferase PMT16%2C putative
Ca25834	Ca3	31149428	31152067	-0.934793	2.37778	-5.23318	2.50556e-05	0.000141579	2.40498	PREDICTED: uncharacterized protein LOC101489048 n_1 Tax_Cicer arietinum RepID_UPI00032A6B61	AT2G45720.2	ARM repeat superfamily protein	Medtr7g076220.1	armadillo/beta-catenin-like repeat protein
Ca25828	Ca3	31177785	31179640	1.05808	3.56434	6.78923	5.86255e-07	7.42108e-06	5.99493	Uncharacterized protein n_4 Tax_Papilionoideae RepID_A2Q3Q2_MEDTR			Medtr7g076250.1	zinc finger%2C C3HC4 type (RING finger) protein
Ca25859	Ca3	31224908	31233956	0.898326	1.58204	5.68124	8.29182e-06	5.78574e-05	3.65212	SET domain protein n_3 Tax_Papilionoideae RepID_G7L2K0_MEDTR	AT1G01920.1	SET domain-containing protein	Medtr7g076590.2	SET domain protein
Ca25861	Ca3	31263065	31271404	0.735451	3.85216	4.82731	6.90099e-05	0.00032318	1.19693	40S ribosomal protein S21 n_2 Tax_Papilionoideae RepID_G7L2J4_MEDTR	AT4G22990.1	Major Facilitator Superfamily with	Medtr7g076520.2	SPX (SYG1/Pho81/XPR1) domain protein MFS transporter
Ca25868	Ca3	31312202	31316563	-1.01859	5.64717	-6.89733	4.56225e-07	6.24802e-06	6.16256	PREDICTED: uncharacterized protein LOC101494441 n_1 Tax_Cicer arietinum RepID_UPI00032A71C7	AT4G23890.1	unknown protein; FUNCTIONS IN: molecular_function	Medtr7g076620.2	hypothetical protein
Ca25864	Ca3	31318200	31323640	0.616894	3.6198	5.68219	8.27258e-06	5.77759e-05	3.32654	PREDICTED: pumilio homolog 23 n_1 Tax_Cicer arietinum RepID_UPI00032AAA94	AT1G72320.1	pumilio 23	Medtr7g117545.1	pumilio-family RNA-binding repeatprotein
Ca25885	Ca3	31478561	31480119	0.705708	5.90122	6.24717	2.10635e-06	1.99607e-05	4.623	Uncharacterized protein n_1 Tax_Medicago truncatula RepID_I3T7Q5_MEDTR	AT4G36130.1	Ribosomal protein L2 family	Medtr7g076940.1	60S ribosomal L8-like protein
Ca25875	Ca3	31517973	31522999	-0.823828	4.24941	-7.09982	2.86358e-07	4.41072e-06	6.65299	LRR receptor-like kinase n_2 Tax_Papilionoideae RepID_G7L3M7_MEDTR	AT4G00710.1	BR-signaling kinase 3	Medtr7g077150.2	LRR receptor-like kinase
Ca25926	Ca3	31583622	31591348	-0.534884	3.82683	-5.02112	4.24953e-05	0.000216434	1.66774	Beta-amylase n_2 Tax_Papilionoideae RepID_A0A072U1V6_MEDTR	AT2G45880.1	beta-amylase 7	Medtr7g077410.1	beta-amylase-like protein
Ca25925	Ca3	31667375	31687311	0.850579	4.45502	5.23404	2.50024e-05	0.000141477	2.16288	Uncharacterized protein n_3 Tax_Soja RepID_I1MYQ8_SOYBN	AT4G30990.2	ARM repeat superfamily protein	Medtr3g083970.1	DRIM (down-regulated in metastasis)-like protein
Ca25927	Ca3	31710555	31715761	1.39415	4.2574	8.74147	8.00948e-09	4.00343e-07	10.2665	PREDICTED: U-box domain-containing protein 33 isoform X1 n_2 Tax_Cicer arietinum RepID_UPI00032A5842	AT2G45910.1	U-box domain-containing protein kinase	Medtr7g077780.1	U-box kinase family protein
Ca25928	Ca3	31772728	31778204	-1.34155	7.50879	-8.74385	7.97018e-09	3.99685e-07	10.2439	Phosphate transporter n_2 Tax_Papilionoideae RepID_G7L4P4_MEDTR	AT4G00370.1	Major facilitator superfamily	Medtr7g077830.1	phosphate transporter
Ca25913	Ca3	31797152	31805898	-0.656532	8.27867	-5.62121	9.60666e-06	6.51569e-05	3.08106	PREDICTED: uncharacterized protein LOC101510881 n_1 Tax_Cicer arietinum RepID_UPI00032ABD30	AT2G45990.2	unknown protein; FUNCTIONS IN: molecular_function	Medtr7g077880.1	hypothetical protein
Ca25911	Ca3	31825817	31829514	-0.592837	7.12831	-4.80595	7.2804e-05	0.00033805	1.0754	Cysteine synthase n_6 Tax_Papilionoideae RepID_G7L5N4_MEDTR	AT3G61440.1	cysteine	Medtr7g078070.2	cysteine synthase/L-3-cyanoalanine synthase
Ca25943	Ca3	32005373	32005686	-1.42069	2.68606	-8.80569	7.01451e-09	3.69955e-07	10.4997	No Hits			#N/A	#N/A
Ca25940	Ca3	32015616	32019421	-0.537033	5.99683	-4.96527	4.88595e-05	0.000242807	1.473	Brassinosteroid insensitive 1-associated receptor kinase n_2 Tax_Papilionoideae RepID_G7L6L4_MEDTR	AT1G01540.1	Protein kinase superfamily protein	Medtr7g078730.1	brassinosteroid insensitive 1-associated receptor kinase
Ca25941	Ca3	32025722	32033390	0.756687	5.60276	7.51955	1.10915e-07	2.31755e-06	7.58892	CAAX prenyl protease 1 like n_7 Tax_Papilionoideae RepID_A0A0B2NQL0_GLYSO	AT4G01320.1	Peptidase family M48	Medtr7g078760.1	CAAX prenyl protease-like protein
Ca25944	Ca3	32164427	32165790	-1.11425	1.51539	-5.55734	1.12394e-05	7.30894e-05	3.34954	PREDICTED: WRKY transcription factor 22-like n_1 Tax_Cicer arietinum RepID_UPI00032A924C	AT4G01250.1	WRKY family transcription	Medtr7g079040.1	WRKY family transcription factor
Ca25946	Ca3	32170373	32174460	-1.26223	4.61472	-8.93659	5.36168e-09	3.17856e-07	10.6535	Proline iminopeptidase-like protein n_2 Tax_Medicago truncatula RepID_G7L6P1_MEDTR	AT3G61540.1	alpha/beta-Hydrolases superfamily protein	Medtr7g079030.2	proline iminopeptidase-like protein
Ca25958	Ca3	32191436	32192689	-1.0122	4.33262	-5.4643	1.41356e-05	8.82826e-05	2.73192	PREDICTED: desiccation protectant protein Lea14 homolog isoform X1 n_2 Tax_Cicer arietinum RepID_UPI00032A71D0	AT1G01470.1	Late embryogenesis abundant	Medtr8g028480.1	late embryogenesis abundant protein
Ca25978	Ca3	32356455	32361773	0.846677	5.58922	5.4578	1.43641e-05	8.9587e-05	2.69424	ABC-type cobalt transport system - ATPase component n_4 Tax_Papilionoideae RepID_G7KQL9_MEDTR	AT1G65410.1	non-intrinsic ABC	Medtr7g079540.1	ABC-type cobalt transport system%2C ATPase component
Ca25974	Ca3	32369220	32372317	-0.777096	6.17894	-5.2328	2.50794e-05	0.000141651	2.13996	PREDICTED: CBS domain-containing protein CBSX6 n_1 Tax_Cicer arietinum RepID_UPI00032A9BA5	AT1G65320.1	Cystathionine beta-synthase (CBS) family	Medtr7g079680.1	CBS domain CBSX5-like protein
Ca25975	Ca3	32385871	32389598	-1.91801	1.84195	-5.14411	3.12706e-05	0.000168826	2.30028	PREDICTED: putative auxin efflux carrier component 8 n_1 Tax_Cicer arietinum RepID_UPI00032A6F1C	AT5G16530.1	Auxin efflux carrier family protein	Medtr7g079720.1	auxin efflux carrier family transporter
Ca25993	Ca3	32435022	32442887	-0.881041	7.68749	-5.70829	7.76052e-06	5.4927e-05	3.30721	Zinc finger CCCH domain-containing protein ZFN-like n_6 Tax_Papilionoideae RepID_ZFNL_PEA	AT3G02830.1	zinc finger protein 1	Medtr7g079840.2	zinc finger CCCH domain protein
Ca25971	Ca3	32527758	32534548	1.00186	4.922	7.35155	1.6168e-07	3.01572e-06	7.21162	PREDICTED: isopentenyl-diphosphate Delta-isomerase I n_1 Tax_Cicer arietinum RepID_UPI00032AA9DF	AT3G02780.1	isopentenyl pyrophosphate:dimethylallyl	Medtr7g080060.1	isopentenyl-diphosphate delta-isomerase
Ca25969	Ca3	32555800	32559945	-0.837796	5.38897	-6.353	1.63644e-06	1.63944e-05	4.87435	Riboflavin biosynthesis protein RibD n_3 Tax_Papilionoideae RepID_A0A072U1X8_MEDTR	AT3G47390.1	cytidine/deoxycytidylate deaminase	Medtr7g080117.2	riboflavin biosynthesis protein RibD
Ca25972	Ca3	32576620	32581488	0.454514	5.40372	5.0483	3.97074e-05	0.000204486	1.6776	PREDICTED: serine carboxypeptidase-like 20 n_1 Tax_Cicer arietinum RepID_UPI00032AC1FB	AT4G12910.1	serine carboxypeptidase-like	Medtr8g011350.1	serine carboxypeptidase-like protein
Ca26008	Ca3	32589808	32592643	-0.652845	7.84992	-6.20458	2.33245e-06	2.15297e-05	4.51309	PREDICTED: uncharacterized protein LOC101511104 isoform X1 n_2 Tax_Cicer arietinum RepID_UPI00032A5F35	AT1G65230.1	Uncharacterized conserved protein (DUF2358)	Medtr7g080220.2	DUF2358 family protein
Ca26035	Ca3	32762095	32762655	-1.29122	0.591209	-4.91755	5.5053e-05	0.000269193	1.93477	PREDICTED: uncharacterized protein LOC101491005 n_1 Tax_Cicer arietinum RepID_UPI0006416CD7	AT5G16250.1	unknown protein; BEST Arabidopsis thaliana	Medtr7g080550.1	adenosylhomocysteinase%2C putative
Ca25999	Ca3	32799224	32806827	0.567766	3.46363	4.90583	5.66908e-05	0.000275966	1.42522	PREDICTED: poly(rC)-binding protein 4-like n_1 Tax_Cicer arietinum RepID_UPI00032A74FD			Medtr7g080630.5	poly(rC)-binding-like protein
Ca26016	Ca3	32931853	32935547	1.3374	0.462339	4.54549	0.000139961	0.000577786	1.06703	PREDICTED: formin-like protein 1 n_1 Tax_Cicer arietinum RepID_UPI00032A7F3A	AT3G25500.1	formin homology	Medtr7g080920.1	formin-like 2 domain protein
Ca26022	Ca3	32941385	32944363	-0.620037	7.25283	-5.81414	5.99287e-06	4.52423e-05	3.57135	Acyl-CoA thioesterase - putative n_3 Tax_Papilionoideae RepID_A2Q5W7_MEDTR	AT5G48370.2	Thioesterase/thiol ester dehydrase-isomerase	Medtr7g080930.2	acyl-CoA thioesterase%2C putative
Ca26023	Ca3	32971239	32976128	0.479163	6.2804	5.58742	1.04382e-05	6.89643e-05	3.01743	Uncharacterized protein n_11 Tax_Eukaryota RepID_A0A0D2S4G6_GOSRA	AT1G76030.1	ATPase, V1 complex, subunit B protein	Medtr1g112870.3	archaeal/vacuolar-type H+-ATPase subunit B
Ca26247	Ca3	33276077	33278521	-1.07731	1.8375	-7.25685	2.00275e-07	3.45345e-06	7.25408	PREDICTED: probable LRR receptor-like serine/threonine-protein kinase At4g08850 n_2 Tax_Cicer arietinum RepID_UPI00032A6028	AT4G08850.2	Leucine-rich repeat receptor-like protein	Medtr7g081720.1	LRR receptor-like kinase
Ca26062	Ca3	33311904	33316429	-0.327607	5.78432	-4.79764	7.43355e-05	0.000344117	1.05352	Uncharacterized protein (Fragment) n_1 Tax_Phaseolus vulgaris RepID_V7B5D4_PHAVU	AT1G02130.1		Medtr7g081700.1	RAB GTPase-like protein B1C
Ca26063	Ca3	33318800	33322869	0.873841	6.82989	8.90388	5.73285e-09	3.28611e-07	10.5797	PREDICTED: protein SQS1-like n_1 Tax_Cicer arietinum RepID_UPI00032ACCAA			Medtr7g081660.1	nuclear RNA-binding-like protein
Ca26061	Ca3	33350890	33355151	0.651075	4.48964	6.32506	1.74902e-06	1.71462e-05	4.82267	Eukaryotic translation initiation factor 3 subunit I n_7 Tax_rosids RepID_Q94KS2_PHAVU	AT2G46290.1	Transducin/WD40 repeat-like superfamily	Medtr2g087640.1	eukaryotic translation initiation factor 3 subunit I
Ca26065	Ca3	33372905	33375799	1.99449	2.63564	8.88061	6.0129e-09	3.36436e-07	10.6669	PREDICTED: serine/threonine-protein kinase D6PK-like n_1 Tax_Cicer arietinum RepID_UPI00032A532B	AT2G44830.1	Protein kinase superfamily protein	Medtr7g081665.1	Serine/Threonine kinase family protein
Ca26068	Ca3	33420767	33427344	0.473353	4.34807	5.99318	3.88008e-06	3.21657e-05	4.02776	COP9 signalosome complex subunit-like protein n_5 Tax_Medicago truncatula RepID_A0A072U221_MEDTR			Medtr7g081735.4	COP9 signalosome complex subunit-like protein
Ca26094	Ca3	33519645	33523605	0.810561	3.89026	5.20495	2.6877e-05	0.00014952	2.14067	PREDICTED: uncharacterized protein LOC101513998 n_1 Tax_Cicer arietinum RepID_UPI00032A5EC3	AT1G67040.1	unknown protein; FUNCTIONS IN: molecular_function	Medtr7g082220.1	DUF4378 domain protein
Ca26075	Ca3	33762851	33766447	0.62187	7.20887	7.1869	2.34758e-07	3.86504e-06	6.83294	PREDICTED: ATP-dependent Clp protease proteolytic subunit 3 - chloroplastic n_1 Tax_Cicer arietinum RepID_UPI00064168D5	AT1G66670.1	CLP protease proteolytic	Medtr7g082980.1	ATP-dependent Clp protease proteolytic protein
Ca26078	Ca3	33774200	33776644	-2.33315	2.32348	-5.69634	7.99089e-06	5.61958e-05	3.55913	Heavy metal transport/detoxification superfamily protein n_3 Tax_Papilionoideae RepID_G7KW42_MEDTR	AT5G17450.2	Heavy metal transport/detoxification	Medtr7g083060.1	heavy metal transport/detoxification superfamily protein
Ca26102	Ca3	33788002	33791426	1.38833	2.93416	7.34884	1.6267e-07	3.02682e-06	7.34999	PREDICTED: uncharacterized protein LOC101498821 n_1 Tax_Cicer arietinum RepID_UPI00032AB887	AT2G39650.1	Protein of unknown function (DUF506)	Medtr7g083080.1	plant-specific domain TIGR01615 family protein
Ca26087	Ca3	33924706	33925946	-1.30789	2.83556	-6.84135	5.19387e-07	6.8586e-06	6.19605	PREDICTED: NAC domain-containing protein 45-like n_1 Tax_Cicer arietinum RepID_UPI00032A68E9			Medtr7g083330.1	NAC transcription factor-like protein
Ca26129	Ca3	33998020	34000782	0.686935	5.53277	8.03452	3.57628e-08	1.10727e-06	8.73046	Translocon-associated protein beta family-like protein n_3 Tax_Papilionoideae RepID_G7KW77_MEDTR	AT5G14030.4	translocon-associated protein beta	Medtr7g083560.2	translocon-associated protein beta family-like protein
Ca26135	Ca3	34084968	34087850	0.75306	7.87182	6.4509	1.29714e-06	1.36168e-05	5.10225	Mitochondrial substrate carrier n_3 Tax_Papilionoideae RepID_Q2HUK6_MEDTR	AT5G14040.1	phosphate transporter 3;1	Medtr7g083790.1	phosphate carrier protein
Ca26160	Ca3	34099965	34113782	0.811291	4.06181	6.4674	1.24746e-06	1.32014e-05	5.19278	Nuclear cap-binding protein n_2 Tax_Papilionoideae RepID_G7KX77_MEDTR	AT2G13540.1	ARM repeat	Medtr7g083840.1	nuclear cap-binding protein
Ca26154	Ca3	34122368	34126902	-1.6474	0.133419	-4.69902	9.51935e-05	0.000420683	1.44624	PREDICTED: zerumbone synthase-like isoform X1 n_2 Tax_Cicer arietinum RepID_UPI00032AACD1	AT3G26760.1	NAD(P)-binding Rossmann-fold superfamily	Medtr7g083870.1	short-chain dehydrogenase/reductase
Ca26161	Ca3	34156133	34163604	1.19459	7.33005	6.30405	1.83883e-06	1.78571e-05	4.75753	CAZy family GT29 glycosyltransferase n_3 Tax_Papilionoideae RepID_G7KX93_MEDTR	AT1G08660.1	MALE GAMETOPHYTE DEFECTIVE 2	Medtr7g084010.1	CAZy family GT29 glycosyltransferase
Ca26163	Ca3	34209619	34219371	0.773273	3.80174	6.72891	6.74733e-07	8.19051e-06	5.82486	PREDICTED: histone-lysine N-methyltransferase - H3 lysine-9 specific SUVH4 n_1 Tax_Cicer arietinum RepID_UPI00032A6F19	AT5G13960.1	SU(VAR)3-9 homolog	Medtr7g084090.1	histone-lysine N-methyltransferase%2C suvh protein
Ca26149	Ca3	34297175	34300235	1.31252	3.28269	7.17105	2.43386e-07	3.94578e-06	6.90516	PREDICTED: protein Mpv17-like - partial n_1 Tax_Cicer arietinum RepID_UPI00064134A4	AT5G19750.1	Peroxisomal membrane 22 kDa (Mpv17/PMP22)	#N/A	#N/A
Ca26147	Ca3	34347938	34351256	-0.824863	6.7732	-5.70477	7.82752e-06	5.52732e-05	3.30666	PREDICTED: uncharacterized protein LOC101511199 n_1 Tax_Cicer arietinum RepID_UPI00032ABE15	AT5G13440.1	Ubiquinol-cytochrome C reductase iron-sulfur	Medtr7g084150.1	cytochrome B-c1 complex subunit Rieske protein
Ca26140	Ca3	34420093	34421308	1.31081	1.77447	7.18921	2.3353e-07	3.8575e-06	7.11604	PREDICTED: UPF0496 protein At3g19330-like n_1 Tax_Cicer arietinum RepID_UPI00032A698C	AT3G19330.1	Protein of unknown function (DUF677)	Medtr7g084240.3	transmembrane protein%2C putative
Ca26139	Ca3	34455828	34458023	2.46636	7.83331	8.08558	3.20281e-08	1.03131e-06	8.8329	Uncharacterized protein n_16 Tax_fabids RepID_I1N828_SOYBN	AT5G13930.1	Chalcone and stilbene	Medtr7g084300.1	chalcone and stilbene synthase family protein
Ca26198	Ca3	34577175	34580083	-1.22879	4.8394	-10.1928	4.54656e-10	6.15395e-08	13.1335	Substrate carrier family protein n_3 Tax_Papilionoideae RepID_A0A072UCC3_MEDTR	AT5G51050.1	Mitochondrial substrate carrier family	Medtr7g084400.1	substrate carrier family protein
Ca26168	Ca3	34600971	34613159	1.07261	5.73241	6.82931	5.34102e-07	6.96428e-06	6.00495	DEAD-box-like helicase superfamily protein n_2 Tax_Papilionoideae RepID_G7KY98_MEDTR	AT3G02060.2	DEAD/DEAH box helicase, putative	Medtr7g084560.2	DEAD-box-like helicase superfamily protein
Ca26167	Ca3	34626586	34628854	-0.858817	3.1738	-6.55741	1.0087e-06	1.11716e-05	5.48191	PREDICTED: syntaxin-22-like n_1 Tax_Cicer arietinum RepID_UPI00032AB84D	AT5G46860.1	Syntaxin/t-SNARE	Medtr7g084590.1	syntaxin of plants protein
Ca26166	Ca3	34674391	34675171	-1.48096	2.51718	-5.14205	3.14316e-05	0.000169576	2.16167	PREDICTED: uncharacterized protein LOC101492622 n_1 Tax_Cicer arietinum RepID_UPI00032AC4F7	AT5G47920.1	unknown protein; BEST Arabidopsis thaliana	Medtr7g084740.1	plant/MAC12-16 protein
Ca26180	Ca3	34714705	34717722	-0.857008	5.05164	-5.59522	1.02399e-05	6.80363e-05	3.03371	PREDICTED: pentatricopeptide repeat-containing protein At3g26630 - chloroplastic n_1 Tax_Cicer arietinum RepID_UPI00064172E4	AT3G26630.1	Tetratricopeptide repeat (TPR)-like	Medtr7g084830.1	PPR containing plant-like protein
Ca26201	Ca3	34871900	34877031	0.53369	5.85301	5.3439	1.90372e-05	0.000113024	2.41347	Apyrase-like protein n_3 Tax_Medicago truncatula RepID_Q84UD8_MEDTR	AT5G18280.2	apyrase 2	Medtr7g085090.1	GDA1/CD39 nucleoside phosphatase family protein
Ca26184	Ca3	34927347	34930425	0.619379	5.32012	5.07743	3.6924e-05	0.000193276	1.74942	PREDICTED: uncharacterized protein LOC101500308 n_1 Tax_Cicer arietinum RepID_UPI00032ABDBC	AT2G39050.1	hydroxyproline-rich glycoprotein family	Medtr7g085240.1	ricin-type beta-trefoil lectin domain protein
Ca26183	Ca3	34974077	34976250	1.3986	4.66447	5.08206	3.65008e-05	0.000191311	1.77989	PREDICTED: thioredoxin-like 1-1 - chloroplastic n_1 Tax_Cicer arietinum RepID_UPI00032A7AC8	AT1G08570.1	atypical CYS HIS rich thioredoxin	Medtr7g085310.2	thioredoxin-like protein 1-1
Ca26349	Ca3	35015650	35020391	-0.917376	5.98931	-7.25998	1.9886e-07	3.44069e-06	7.00142	PREDICTED: uncharacterized protein LOC101502729 n_1 Tax_Cicer arietinum RepID_UPI00032ABEEC			Medtr7g085420.2	HNH endonuclease domain protein
Ca26195	Ca3	35022445	35025078	-0.815336	3.6529	-6.04318	3.43857e-06	2.92997e-05	4.19906	PHD finger protein ING n_3 Tax_Papilionoideae RepID_A2Q5P5_MEDTR	AT1G54390.3	PHD finger protein-related	Medtr7g085450.1	PHD finger-like protein
Ca26348	Ca3	35036085	35040723	1.1962	5.13293	5.85573	5.41574e-06	4.17719e-05	3.67797	PREDICTED: uncharacterized protein LOC101504344 isoform X1 n_2 Tax_Cicer arietinum RepID_UPI00032AD159	AT3G13460.4	evolutionarily conserved C-terminal	Medtr7g085500.1	evolutionarily carboxy-terminal region protein
Ca26190	Ca3	35070626	35073558	-0.80671	5.9658	-7.05647	3.16241e-07	4.77013e-06	6.5335	PREDICTED: dnaJ homolog subfamily B member 7 n_1 Tax_Cicer arietinum RepID_UPI00032AA7C3	AT5G18140.1	Chaperone DnaJ-domain superfamily protein	Medtr7g085600.1	chaperone DnaJ domain protein
Ca26353	Ca3	35092534	35094099	1.4118	2.59948	5.53727	1.18085e-05	7.62715e-05	3.15626	Uncharacterized protein (Fragment) n_6 Tax_Papilionoideae RepID_A0A0S3RWE2_PHAAN	AT3G03920.1	H/ACA ribonucleoprotein complex, subunit	Medtr7g085640.1	Gar1/Naf1 RNA-binding region protein
Ca26347	Ca3	35137042	35138669	0.876388	4.91525	5.86771	5.2602e-06	4.09439e-05	3.70949	Uncharacterized protein n_3 Tax_Pentapetalae RepID_A0A0D2S4U3_GOSRA	AT3G47370.3	Ribosomal protein S10p/S20e family	Medtr7g092720.1	40S ribosomal protein S20-2
Ca26223	Ca3	35254069	35261417	-0.940286	6.64518	-8.78114	7.37892e-09	3.80002e-07	10.3264	No Hits	AT3G03790.3	ankyrin repeat family protein / regulator	Medtr7g086050.1	regulator of chromosome condensation (RCC1) family protein
Ca26225	Ca3	35261690	35261900	-1.61424	2.5948	-7.99593	3.88809e-08	1.15076e-06	8.80596	No Hits			#N/A	#N/A
Ca26224	Ca3	35277247	35281239	0.56073	4.5497	6.23565	2.16523e-06	2.0379e-05	4.60726	RNA-binding (RRM/RBD/RNP motif) family protein n_2 Tax_Papilionoideae RepID_Q2HVL4_MEDTR	AT5G32450.1	RNA binding (RRM/RBD/RNP motifs) family	Medtr7g086080.1	RNA-binding (RRM/RBD/RNP motif) family protein
Ca26210	Ca3	35315665	35320675	1.05309	10.1005	5.41226	1.60746e-05	9.81481e-05	2.49144	Methionine synthase n_12 Tax_Papilionoideae RepID_Q71EW8_SOYBN	AT5G17920.2	Cobalamin-independent synthase	Medtr3g079640.1	cobalamin-independent methionine synthase
Ca26211	Ca3	35358019	35366177	1.28387	0.727148	6.07389	3.1931e-06	2.76862e-05	4.62728	PREDICTED: pentatricopeptide repeat-containing protein At4g39530 n_1 Tax_Cicer arietinum RepID_UPI00032AA758	AT4G39530.1	Tetratricopeptide repeat (TPR)-like	Medtr8g098250.1	PPR containing plant-like protein
Ca26232	Ca3	35434443	35437871	1.79317	1.60298	7.43533	1.33918e-07	2.64635e-06	7.66968	PREDICTED: uncharacterized protein LOC101495749 n_1 Tax_Cicer arietinum RepID_UPI00032A770D	AT4G23620.1	Ribosomal protein L25/Gln-tRNA synthetase,	Medtr7g086470.2	50S ribosomal protein L25%2C putative
Ca26277	Ca3	35601263	35605223	-0.469982	2.51843	-4.95769	4.97945e-05	0.000246635	1.69834	PREDICTED: tRNA-specific adenosine deaminase 2-like n_1 Tax_Cicer arietinum RepID_UPI00032AB8A7	AT1G48175.1	Cytidine/deoxycytidylate deaminase	Medtr7g086830.1	tRNA-specific adenosine deaminase
Ca26259	Ca3	35726399	35730373	1.10201	2.00947	6.96308	3.91962e-07	5.61861e-06	6.58457	PREDICTED: frataxin - mitochondrial n_1 Tax_Cicer arietinum RepID_UPI00032AC38E			Medtr6g071700.1	iron donor protein CyaY
Ca26255	Ca3	35732426	35734927	1.72602	2.23494	6.75848	6.29764e-07	7.76793e-06	6.10219	PREDICTED: p21-activated protein kinase-interacting protein 1-like n_1 Tax_Cicer arietinum RepID_UPI00032A6CB7	AT1G65030.1	Transducin/WD40 repeat-like superfamily	Medtr2g049300.1	p21-activated kinase-interacting-like protein
Ca26256	Ca3	35762282	35766732	1.25663	5.34181	5.30948	2.07327e-05	0.000120987	2.32808	PREDICTED: probable S-sulfocysteine synthase - chloroplastic n_1 Tax_Cicer arietinum RepID_UPI00032AC04B	AT3G03630.1	cysteine synthase 26	Medtr7g087110.1	O-acetylserine (thiol) lyase
Ca26281	Ca3	35801712	35805555	0.708289	7.9748	6.58607	9.42898e-07	1.05576e-05	5.42169	PREDICTED: grpE protein homolog - mitochondrial isoform X1 n_2 Tax_Cicer arietinum RepID_UPI00032ACBD2	AT5G17710.1	Co-chaperone GrpE family protein	Medtr7g087250.2	co-chaperone GrpE family protein
Ca26284	Ca3	35809154	35812900	4.17779	3.88146	10.3817	3.19015e-10	4.97891e-08	13.5386	Protein DETOXIFICATION n_3 Tax_Papilionoideae RepID_G7L2P1_MEDTR	AT1G33110.2	MATE efflux family protein	Medtr7g087410.1	MATE efflux family protein
Ca26282	Ca3	35853228	35857155	-0.994931	2.16331	-6.00274	3.79148e-06	3.16236e-05	4.31073	PREDICTED: uncharacterized protein LOC101512489 n_1 Tax_Cicer arietinum RepID_UPI00032AB0BF			Medtr7g087480.1	hypothetical protein
Ca26252	Ca3	35894817	35897072	1.58205	5.0059	6.38733	1.50821e-06	1.53174e-05	4.96367	Serine hydrolase n_3 Tax_Papilionoideae RepID_G7L2Q8_MEDTR			Medtr7g087570.1	serine hydrolase
Ca26250	Ca3	35916866	35919645	-0.524367	4.55937	-5.37419	1.76617e-05	0.000105936	2.49712	PREDICTED: ubiquitin-conjugating enzyme E2 22 n_1 Tax_Cicer arietinum RepID_UPI00032A6BAC	AT5G05080.2	ubiquitin-conjugating	Medtr7g087590.2	ubiquitin-conjugating enzyme
Ca28089	Ca3	36002724	36007369	0.715118	5.89492	8.34603	1.83459e-08	6.96278e-07	9.40551	Translocase of chloroplast 34 n_1 Tax_Pisum sativum RepID_TOC34_PEA	AT5G05000.1	translocon at	Medtr7g088050.2	translocon at the outer envelope membrane ofs protein
Ca26294	Ca3	36170839	36176050	2.11938	1.25839	5.28009	2.23005e-05	0.000128324	2.74263	Transducin/WD40 repeat protein n_3 Tax_Papilionoideae RepID_G7L4S7_MEDTR	AT3G56900.1	Transducin/WD40 repeat-like superfamily	Medtr7g088540.1	transducin/WD40 repeat protein
Ca26306	Ca3	36257982	36260228	1.47807	5.60776	8.47551	1.39541e-08	5.70662e-07	9.6819	Nascent proteinassociated complex alpha chain n_3 Tax_Papilionoideae RepID_G7L4T7_MEDTR	AT5G13850.1	nascent polypeptide-associated	Medtr7g088680.1	nascent proteinassociated complex alpha chain
Ca26297	Ca3	36360637	36365919	-1.27812	5.62459	-5.10332	3.46161e-05	0.000183392	1.81438	p-coumaroyl-shikimate 3'-hydroxylase n_4 Tax_Papilionoideae RepID_C9EGT6_TRIPR	AT2G40890.1	cytochrome P450, family 98,	Medtr8g020940.1	cytochrome P450 family monooxygenase
Ca26302	Ca3	36406696	36409879	1.452	5.64586	9.08309	3.97968e-09	2.5792e-07	10.9471	PREDICTED: protein NRT1/ PTR FAMILY 3.1-like n_1 Tax_Cicer arietinum RepID_UPI0006410332	AT1G68570.1	Major facilitator superfamily protein	Medtr7g088790.1	peptide/nitrate transporter
Ca26313	Ca3	36586336	36593359	0.989867	2.4004	6.86235	4.9471e-07	6.61994e-06	6.30539	PREDICTED: cell division control protein 48 homolog B n_1 Tax_Cicer arietinum RepID_UPI00032A72A5	AT2G03670.1	cell division cycle 48B	Medtr7g088980.3	cell division cycle protein-like/CDC48 protein
Ca26325	Ca3	36742290	36743560	1.73097	1.57011	4.745	8.48239e-05	0.00038316	1.39743	PREDICTED: 10 kDa chaperonin-like n_1 Tax_Cicer arietinum RepID_UPI00032AB057	AT1G14980.1	chaperonin 10	Medtr7g089300.1	GroES chaperonin
Ca26332	Ca3	36867208	36872512	0.435486	3.67369	4.97857	4.72618e-05	0.000236155	1.5802	Ubiquitin-associated/TS-N domain protein n_3 Tax_Medicago truncatula RepID_G7KQP7_MEDTR	AT3G56740.1	Ubiquitin-associated (UBA) protein	Medtr7g089550.1	ubiquitin-associated/TS-N domain protein
Ca26384	Ca3	36889979	36893511	2.55725	2.03258	6.94198	4.11504e-07	5.80623e-06	6.5618	PREDICTED: pentatricopeptide repeat-containing protein At1g80270 - mitochondrial-like isoform X1 n_2 Tax_Cicer arietinum RepID_UPI00032A6CB3	AT1G80270.3	PENTATRICOPEPTIDE REPEAT 596	Medtr7g089770.1	DNA-binding protein
Ca26389	Ca3	36903794	36916133	1.16932	5.90138	9.19996	3.14368e-09	2.2574e-07	11.1847	DNA gyrase subunit B n_2 Tax_Papilionoideae RepID_G7KQS0_MEDTR	AT5G42090.1	Lung seven transmembrane receptor family	Medtr7g089790.1	DNA gyrase subunit B
Ca26387	Ca3	36964811	36987516	0.590181	12.2355	5.47832	1.36549e-05	8.58061e-05	2.5544	BnaC03g23220D protein n_1 Tax_Brassica napus RepID_A0A078GBV3_BRANA	AT5G04140.1	glutamate	Medtr7g089970.1	ferredoxin-dependent glutamate synthase
Ca26356	Ca3	37046773	37051579	2.27708	2.31598	8.03081	3.60511e-08	1.10946e-06	8.92092	PREDICTED: protein ECERIFERUM 1-like n_1 Tax_Cicer arietinum RepID_UPI00032AA1FD	AT1G02205.1	Fatty acid hydroxylase superfamily	Medtr7g090140.2	fatty acid hydroxylase superfamily protein
Ca26370	Ca3	37107942	37110068	0.719301	1.50075	5.31878	2.02601e-05	0.000118728	2.77705	Uncharacterized protein n_1 Tax_Medicago truncatula RepID_G7KRN5_MEDTR			Medtr7g090260.1	hypothetical protein
Ca26393	Ca3	37424808	37436240	-0.708023	2.78252	-4.83963	6.69108e-05	0.000314796	1.36349	PREDICTED: DNA helicase INO80-like n_1 Tax_Cicer arietinum RepID_UPI000640E9D4	AT3G57300.1	INO80 ortholog	Medtr7g090960.2	DNA helicase INO80-like protein
Ca26452	Ca3	37775241	37779906	2.44929	4.88935	4.99509	4.5351e-05	0.000228247	1.56161	Alkaline alpha-galactosidase n_4 Tax_Papilionoideae RepID_B3F0K7_PEA	AT3G57520.1	seed imbibition 2	Medtr7g091880.1	galactinol-raffinose galactosyltransferase
Ca26410	Ca3	37818680	37821796	-0.898932	4.74272	-6.35292	1.63676e-06	1.63944e-05	4.8802	Cytosolic guanylate kinase n_6 Tax_Papilionoideae RepID_W8VZ39_PEA	AT3G57550.2	guanylate kinase	Medtr7g092020.4	guanylate kinase-like protein
Ca26409	Ca3	37845853	37848767	1.07625	5.32661	5.2602	2.3429e-05	0.000133797	2.20552	ARM repeat CCCH-type zinc finger protein n_2 Tax_Papilionoideae RepID_A2Q3L5_MEDTR	AT2G41900.1	CCCH-type zinc finger protein with	Medtr7g092070.1	ARM repeat CCCH-type zinc finger protein
Ca26429	Ca3	37888095	37891005	0.708351	6.59138	7.43657	1.33545e-07	2.64314e-06	7.40444	Adenylosuccinate synthetase n_3 Tax_Papilionoideae RepID_G7KTL4_MEDTR	AT3G57610.1	adenylosuccinate synthase	Medtr7g092260.1	adenylosuccinate synthetase
Ca26425	Ca3	37978897	37982124	1.63709	1.76246	4.71343	9.18133e-05	0.000408341	1.27826	PREDICTED: probably inactive leucine-rich repeat receptor-like protein kinase At5g06940 n_1 Tax_Cicer arietinum RepID_UPI00032A98AE	AT5G06940.1	Leucine-rich repeat receptor-like protein	Medtr7g092430.1	LRR receptor-like kinase family protein
Ca26479	Ca3	38235413	38242115	-1.65929	2.12914	-5.28669	2.19381e-05	0.000126668	2.59883	No Hits	AT3G20760.1	Nse4, component of Smc5/6 DNA repair	Medtr7g093090.1	Nse4%2C component of Smc5/6 DNA repair complex protein
Ca26474	Ca3	38246300	38249185	1.22058	3.49443	6.24105	2.13744e-06	2.01928e-05	4.70134	Uncharacterized protein n_6 Tax_Phaseoleae RepID_V7CYE7_PHAVU	AT3G12130.1	KH domain-containing protein / zinc	Medtr7g093130.1	zinc finger C-x8-C-x5-C-x3-H type family protein
Ca26482	Ca3	38251511	38256605	4.28029	4.4035	5.15788	3.02167e-05	0.000164413	2.02264	PREDICTED: uncharacterized protein At4g19900-like n_1 Tax_Cicer arietinum RepID_UPI00032AB75E	AT4G19900.1	alpha 1,4-glycosyltransferase family	Medtr4g075580.1	alpha 1%2C4-glycosyltransferase family protein%2C putative
Ca26476	Ca3	38263820	38265689	0.844987	9.19084	5.7736	6.61564e-06	4.89058e-05	3.42174	Oleate desaturase n_4 Tax_Papilionoideae RepID_A4ZYU3_9FABA	AT3G12120.2	fatty acid desaturase 2	Medtr7g093200.1	microsomal omega-3 fatty acid desaturase
Ca26519	Ca3	38400607	38404057	0.554975	3.40852	5.2334	2.50419e-05	0.000141579	2.24472	PREDICTED: gamma-tubulin complex component 3 n_1 Tax_Cicer arietinum RepID_UPI00032ACDED	AT5G06680.1	spindle	Medtr7g093560.1	tubulin gamma complex-associated protein
Ca26499	Ca3	38550297	38551693	4.13758	1.02107	6.47098	1.23695e-06	1.31383e-05	5.52308	PREDICTED: gibberellin receptor GID1B-like n_1 Tax_Cicer arietinum RepID_UPI00032A9060	AT3G63010.1	alpha/beta-Hydrolases	Medtr7g093950.1	gibberellin receptor GID1c-like protein
Ca26502	Ca3	38577065	38581037	0.92903	4.55504	5.04592	3.99445e-05	0.0002055	1.68875	Sugar porter (SP) family MFS transporter n_3 Tax_Papilionoideae RepID_A0A072UCW0_MEDTR	AT2G48020.1	Major facilitator superfamily protein	Medtr7g094450.1	sugar porter (SP) family MFS transporter
Ca26524	Ca3	38614154	38618132	1.7836	4.36975	8.88982	5.90041e-09	3.34248e-07	10.5775	Elongation factor Tu n_1 Tax_Medicago truncatula RepID_A0A072U201_MEDTR	AT4G02930.1	GTP binding Elongation factor Tu family	Medtr7g094460.1	GTP-binding elongation factor Tu family protein
Ca26533	Ca3	38638795	38639562	-0.911455	6.45783	-6.70807	7.08385e-07	8.44486e-06	5.72238	PREDICTED: short-chain type dehydrogenase/reductase-like n_1 Tax_Cicer arietinum RepID_UPI00032AC31B	AT3G03980.1	NAD(P)-binding Rossmann-fold superfamily	Medtr7g094510.1	enoyl-(acyl carrier) reductase
Ca26532	Ca3	38646933	38647700	3.22965	2.16858	6.70403	7.15096e-07	8.4786e-06	6.00757	PREDICTED: short-chain type dehydrogenase/reductase-like - partial n_1 Tax_Cicer arietinum RepID_UPI000640FEEA	AT3G03980.1	NAD(P)-binding Rossmann-fold superfamily	Medtr7g094520.1	short-chain dehydrogenase/reductase
Ca26540	Ca3	38736122	38745974	0.632243	4.46733	5.46235	1.42037e-05	8.86355e-05	2.72131	PREDICTED: multiple RNA-binding domain-containing protein 1 n_1 Tax_Cicer arietinum RepID_UPI00032AD24F	AT4G19610.1	nucleotide binding;nucleic acid binding;RNA	Medtr7g094660.1	RNA-binding (RRM/RBD/RNP motif) family protein
Ca26546	Ca3	38953770	38955016	-1.14407	5.10696	-5.41062	1.61396e-05	9.85058e-05	2.58257	PREDICTED: uncharacterized protein LOC101509912 n_1 Tax_Cicer arietinum RepID_UPI00032AC3D5	AT4G02725.2	unknown protein; FUNCTIONS IN: molecular_function	Medtr7g095090.1	transmembrane protein%2C putative
Ca26574	Ca3	39026435	39029305	-1.60526	2.40033	-6.4809	1.20828e-06	1.29235e-05	5.41718	PREDICTED: type I inositol 1 -4 -5-trisphosphate 5-phosphatase CVP2-like n_1 Tax_Cicer arietinum RepID_UPI00032AC5F4	AT3G63240.1	DNAse I-like superfamily protein	Medtr7g095260.1	type I inositol 1%2C4%2C5-trisphosphate 5-phosphatase CVP2
Ca26569	Ca3	39057957	39059397	-0.9034	2.38654	-6.83627	5.2555e-07	6.90352e-06	6.24038	PREDICTED: putative nuclease HARBI1 n_1 Tax_Cicer arietinum RepID_UPI00032A7626	AT3G63270.1	CONTAINS InterPro DOMAIN/s: Putative	#N/A	#N/A
Ca26590	Ca3	39111695	39121896	-2.31561	3.97529	-8.2244	2.37719e-08	8.37769e-07	9.18888	PREDICTED: heat stress transcription factor A-6b n_1 Tax_Cicer arietinum RepID_UPI00032AAAAD	AT3G22830.1	heat shock transcription	Medtr7g095680.1	heat shock transcription factor A3
Ca26586	Ca3	39158171	39161748	-1.05035	1.80455	-6.01947	3.64118e-06	3.06167e-05	4.41956	PREDICTED: protein LONGIFOLIA 1-like n_1 Tax_Cicer arietinum RepID_UPI00032A631A	AT3G63430.1	unknown protein; BEST Arabidopsis thaliana	Medtr7g095890.1	DUF4378 domain protein
Ca26597	Ca3	39434051	39437107	0.584704	5.07117	5.40777	1.62538e-05	9.91237e-05	2.57064	HR-like lesion-inducing protein n_2 Tax_Papilionoideae RepID_A0A072U2I5_MEDTR			#N/A	#N/A
Ca26608	Ca3	39655342	39657264	2.0726	1.69471	6.33019	1.72779e-06	1.70203e-05	5.18746	PREDICTED: H/ACA ribonucleoprotein complex subunit 3-like protein n_1 Tax_Cicer arietinum RepID_UPI00032AA111			#N/A	#N/A
Ca26632	Ca3	39717722	39720989	-0.757092	4.9777	-5.01922	4.26981e-05	0.000217255	1.606	PREDICTED: long-chain-alcohol oxidase FAO2 n_1 Tax_Cicer arietinum RepID_UPI00032AA82E	AT4G28570.1	Long-chain fatty alcohol dehydrogenase	Medtr7g097210.1	long-chain-alcohol oxidase FAO1
Ca26646	Ca3	39811293	39812379	0.896538	5.96717	6.73021	6.72682e-07	8.17859e-06	5.77256	Uncharacterized protein (Fragment) n_2 Tax_rosids RepID_R0I5H7_9BRAS	AT3G04400.1	Ribosomal protein L14p/L23e	Medtr1g069585.1	60S ribosomal L23-like protein
Ca26642	Ca3	39856052	39861928	0.661596	5.67685	6.91541	4.37543e-07	6.06729e-06	6.20458	PREDICTED: putative G3BP-like protein n_1 Tax_Cicer arietinum RepID_UPI00032AB35E	AT5G43960.1	Nuclear transport factor 2 (NTF2) family	Medtr7g098440.1	ras GTPase-activating binding-like protein
Ca26684	Ca3	39922687	39930067	0.676641	4.40665	5.22665	2.54655e-05	0.000143513	2.14319	ABC transporter-like family-protein n_2 Tax_Papilionoideae RepID_G7KYF1_MEDTR	AT1G04120.2	multidrug resistance-associated	Medtr7g098690.1	ABC transporter-like family-protein
Ca26679	Ca3	39982418	39986139	1.07844	4.68025	8.36314	1.7692e-08	6.78195e-07	9.44874	Transducin/WD-like repeat-protein n_2 Tax_Papilionoideae RepID_G7KYH2_MEDTR	AT2G20330.1	Transducin/WD40 repeat-like superfamily	Medtr7g098900.1	transducin/WD-like repeat-protein
Ca26658	Ca3	40063579	40066136	-0.893303	4.97263	-4.98003	4.70899e-05	0.000235449	1.51355	PREDICTED: uncharacterized protein LOC101508526 n_2 Tax_Cicer arietinum RepID_UPI00032A85D0			Medtr7g098450.1	TPR repeat protein
Ca26663	Ca3	40205579	40207502	2.16095	0.104426	4.93705	5.24315e-05	0.000257898	1.99982	PREDICTED: espin-like isoform X1 n_1 Tax_Cicer arietinum RepID_UPI00032AA593	AT3G13950.1	unknown protein; BEST Arabidopsis thaliana	Medtr7g099570.1	ankyrin repeat protein
Ca26665	Ca3	40244915	40249852	-1.46624	5.24355	-9.28155	2.66926e-09	2.06194e-07	11.3482	PREDICTED: uncharacterized protein LOC101495526 n_1 Tax_Cicer arietinum RepID_UPI000641081A	AT3G09450.1	CONTAINS InterPro DOMAIN/s: Fusaric	Medtr7g099710.1	fusaric acid resistance family protein
Ca26675	Ca3	40250545	40250785	1.01377	1.68503	5.16081	2.99974e-05	0.000163452	2.3658	Oligosaccaryltransferase n_1 Tax_Medicago truncatula RepID_G7KZM4_MEDTR			Medtr7g099720.1	oligosaccaryltransferase
Ca26700	Ca3	40283050	40317013	-0.790988	3.90776	-5.58148	1.05916e-05	6.97071e-05	3.04812	PREDICTED: cation/H(+) antiporter 20-like n_1 Tax_Cicer arietinum RepID_UPI00032AD2C5	AT4G23160.1	cysteine-rich RLK (RECEPTOR-like	Medtr7g099800.1	cation/H+ exchanger 3
Ca26706	Ca3	40336362	40354051	0.65491	6.97734	4.96097	4.93879e-05	0.000244971	1.46249	PREDICTED: LOW QUALITY PROTEIN: eukaryotic translation initiation factor 3 subunit A-like n_1 Tax_Cicer arietinum RepID_UPI000641147B	AT4G11420.1		Medtr7g099920.1	eukaryotic translation initiation factor 3a
Ca26704	Ca3	40354997	40357345	1.08231	6.62371	7.60551	9.15951e-08	2.02742e-06	7.78429	PREDICTED: elongation factor 1-delta 2-like n_2 Tax_Cicer arietinum RepID_UPI00032ACF74	AT1G30230.2	Glutathione S-transferase, C-terminal-like;Translation	Medtr4g019610.2	elongation factor 1-beta
Ca26703	Ca3	40379181	40382652	2.9824	2.41266	6.26704	2.00866e-06	1.91776e-05	5.03313	PREDICTED: uncharacterized protein LOC101499143 n_1 Tax_Cicer arietinum RepID_UPI00032AA556	AT3G53630.1	unknown protein; BEST Arabidopsis thaliana	Medtr7g099970.1	hypothetical protein
Ca26693	Ca3	40459147	40460666	-0.769172	2.69478	-5.02313	4.22827e-05	0.000215571	1.82947	PREDICTED: uncharacterized protein LOC101501884 n_1 Tax_Cicer arietinum RepID_UPI00032ABFFD			Medtr7g100450.1	copper chaperone
Ca26732	Ca3	40611230	40613412	0.819503	4.92756	6.97774	3.78946e-07	5.47307e-06	6.35228	P-loop nucleoside triphosphate hydrolase superfamily protein n_2 Tax_Papilionoideae RepID_G7L1P0_MEDTR	AT2G37250.1	adenosine kinase	Medtr7g100530.1	P-loop nucleoside triphosphate hydrolase superfamily protein
Ca26726	Ca3	40615888	40618540	-0.576194	6.85853	-4.85281	6.47395e-05	0.000306941	1.19428	Thioredoxin-like protein AAED1 n_2 Tax_Papilionoideae RepID_G7L1P1_MEDTR			Medtr7g100540.1	thioredoxin-like protein AAED1
Ca26730	Ca3	40629134	40629893	-0.885991	4.72874	-7.28026	1.89932e-07	3.33941e-06	7.05036	PREDICTED: uncharacterized protein LOC101511108 n_1 Tax_Cicer arietinum RepID_UPI00032AD3BE	AT3G53470.2	unknown protein; FUNCTIONS IN: molecular_function	Medtr7g061255.1	transmembrane protein%2C putative
Ca26754	Ca3	40688695	40697595	0.810771	4.61992	5.86182	5.33605e-06	4.1324e-05	3.69915	Uncharacterized protein n_1 Tax_Oryza meridionalis RepID_A0A0E0C9Y4_9ORYZ	AT5G02960.1	Ribosomal protein S12/S23 family protein	Medtr7g100720.1	40S ribosomal protein S23-1
Ca26756	Ca3	40752709	40754248	-0.828124	4.04738	-6.19127	2.40805e-06	2.21341e-05	4.52399	PREDICTED: uncharacterized protein LOC101488954 isoform X3 n_1 Tax_Cicer arietinum RepID_UPI000640CF39			Medtr7g100830.1	protamine P1 family protein
Ca26748	Ca3	40779327	40780401	-1.49766	1.69558	-4.89959	5.75832e-05	0.000279067	1.83414	PREDICTED: uncharacterized protein LOC101490574 n_1 Tax_Cicer arietinum RepID_UPI00032AB72C			Medtr2g083910.1	DUF1685 family protein
Ca26768	Ca3	40846365	40847768	0.924838	4.09909	4.76025	8.16406e-05	0.000370972	1.00096	PREDICTED: uncharacterized protein LOC101492513 n_1 Tax_Cicer arietinum RepID_UPI00032A58B4	AT3G53400.1	BEST Arabidopsis thaliana protein match	Medtr7g101130.1	peptide upstream ORF protein%2C putative
Ca26774	Ca3	40851327	40856274	1.32556	4.27854	6.88334	4.71235e-07	6.39533e-06	6.1573	PREDICTED: probable E3 ubiquitin-protein ligase LOG2 n_1 Tax_Cicer arietinum RepID_UPI00032AAECA	AT3G09770.2	RING/U-box superfamily protein	Medtr7g101150.1	E3 ubiquitin-protein ligase%2C putative
Ca26778	Ca3	40861030	40863104	2.56208	1.99101	8.8278	6.70226e-09	3.60954e-07	10.5773	PREDICTED: V-type proton ATPase subunit G1-like n_1 Tax_Cicer arietinum RepID_UPI00032A71D1	AT3G01390.2	vacuolar membrane ATPase	Medtr7g101170.1	vacuolar (H+)-ATPase G subunit
Ca26739	Ca3	40945325	40949099	-0.553978	7.06051	-5.70921	7.74305e-06	5.48287e-05	3.31473	Phenylalanine ammonia-lyase 1 n_10 Tax_Papilionoideae RepID_PAL1_PEA	AT2G37040.1	PHE ammonia lyase 1	Medtr7g101395.1	phenylalanine ammonia-lyase-like protein
Ca26760	Ca3	41017291	41022930	-0.892249	5.02594	-5.61101	9.85025e-06	6.61949e-05	3.07236	PREDICTED: uncharacterized protein LOC101498248 n_1 Tax_Cicer arietinum RepID_UPI00032A5117			Medtr1g063900.2	cysteine proteinase superfamily protein
Ca26759	Ca3	41025113	41029867	0.872678	6.33666	8.47903	1.38509e-08	5.70144e-07	9.68962	PREDICTED: RNA polymerase sigma factor sigF - chloroplastic-like n_1 Tax_Cicer arietinum RepID_UPI00032AA9F6	AT2G36990.1	RNApolymerase	Medtr7g101840.1	RNA polymerase sigma factor
Ca26820	Ca3	41385242	41386897	-1.86964	5.11886	-6.75879	6.29305e-07	7.76793e-06	5.84558	Glycosyltransferase n_3 Tax_Cicer arietinum RepID_A0A067XU14_CICAR	AT2G36780.1	UDP-Glycosyltransferase superfamily	Medtr7g117405.1	UDP-glucosyltransferase family protein
Ca26800	Ca3	41654466	41657922	-0.683319	5.92495	-6.05823	3.31596e-06	2.8525e-05	4.16677	PREDICTED: zinc finger protein CONSTANS-LIKE 2 n_1 Tax_Cicer arietinum RepID_UPI00032A5F59	AT5G15850.1	CONSTANS-like 1	Medtr7g018170.1	zinc finger constans-like protein
Ca26841	Ca3	41826198	41829132	-1.13295	4.99576	-6.46732	1.24769e-06	1.32014e-05	5.14973	PREDICTED: proline dehydrogenase 2 - mitochondrial-like n_1 Tax_Cicer arietinum RepID_UPI00032ABD6F	AT5G38710.1	Methylenetetrahydrofolate reductase	Medtr7g020820.1	proline dehydrogenase
Ca26833	Ca3	41938668	41939075	-1.30477	3.71535	-5.47006	1.39361e-05	8.73575e-05	2.81347	Uncharacterized protein n_1 Tax_Glycine max RepID_K7L8V5_SOYBN			Medtr7g019160.1	hypothetical protein
Ca26844	Ca3	42004000	42009346	1.27173	4.93421	9.33527	2.39784e-09	1.92592e-07	11.4606	Pmr5/Cas1p GDSL/SGNH-like acyl-esterase family protein n_3 Tax_Papilionoideae RepID_A0A072TWN3_MEDTR	AT5G15900.1	TRICHOME BIREFRINGENCE-LIKE 19	Medtr7g019120.1	Pmr5/Cas1p GDSL/SGNH-like acyl-esterase family protein
Ca26854	Ca3	42172500	42177150	-1.00602	5.08723	-7.55951	1.01461e-07	2.18201e-06	7.67921	PREDICTED: binding partner of ACD11 1 n_1 Tax_Cicer arietinum RepID_UPI00032AAA00	AT3G01210.1	RNA-binding (RRM/RBD/RNP motifs) family	Medtr7g010100.1	RNA recognition motif%2C a.k.a. RRM%2C RBD protein
Ca26850	Ca3	42206763	42208194	-2.37499	0.176051	-5.29049	2.17325e-05	0.000125622	2.81486	Transcription factor n_2 Tax_Papilionoideae RepID_G7KZY5_MEDTR			Medtr7g010120.1	transcription factor
Ca26852	Ca3	42253436	42258115	-0.822214	3.10662	-5.23169	2.51487e-05	0.000141989	2.28143	PREDICTED: uncharacterized protein LOC101498903 isoform X1 n_3 Tax_Cicer arietinum RepID_UPI000640CAC3	AT5G39785.2	Protein of unknown function (DUF1666)	Medtr7g010160.1	DUF1666 family protein
Ca26868	Ca3	42299588	42301620	-1.47851	3.59278	-11.4765	4.44239e-11	1.50992e-08	15.4915	PREDICTED: myb-related protein 306-like n_1 Tax_Cicer arietinum RepID_UPI00032AC44C	AT3G28910.1	myb domain protein 30	Medtr7g010210.1	R2R3-myb transcription factor
Ca26916	Ca3	42567135	42567587	-1.46432	2.82809	-5.82151	5.8862e-06	4.46796e-05	3.77321	Photosystem II protein (Fragment) n_6 Tax_Mesangiospermae RepID_Q8HR83_CITLI	ATCG00280.1	photosystem II reaction center	Medtr8g014470.1	photosystem II CP43 chlorophyll apoprotein
Ca26894	Ca3	42686281	42690663	-1.9698	2.26759	-5.82558	5.82808e-06	4.43044e-05	3.87514	Nod26-like major intrinsic protein n_1 Tax_Cicer arietinum RepID_Q6KAW0_CICAR	AT4G19030.1	NOD26-like	Medtr7g010650.2	major intrinsic protein (MIP) family transporter
Ca26934	Ca3	43040784	43043620	-3.0332	1.13156	-9.5537	1.5563e-09	1.45674e-07	11.8272	PREDICTED: cytochrome P450 71A1-like n_1 Tax_Cicer arietinum RepID_UPI00032A5D0B	AT4G31500.1	cytochrome	Medtr7g012330.1	cytochrome P450 family 71 protein
Ca26928	Ca3	43107090	43111194	0.615448	2.8352	6.44426	1.3177e-06	1.37384e-05	5.26367	No Hits			#N/A	#N/A
Ca26939	Ca3	43233258	43237705	-0.555061	9.60602	-6.01242	3.70374e-06	3.10064e-05	3.98778	Cystathionine gamma-synthase n_1 Tax_Cicer arietinum RepID_L0EK12_CICAR	AT3G01120.1	Pyridoxal phosphate	Medtr7g011230.1	cystathionine gamma-synthase
Ca26946	Ca3	43349817	43355739	-0.994552	2.46938	-5.71867	7.56584e-06	5.39989e-05	3.57662	Pectinesterase n_1 Tax_Medicago truncatula RepID_A2Q3R5_MEDTR	AT3G29090.1	pectin methylesterase	Medtr7g011530.1	pectinesterase
Ca26948	Ca3	43357205	43361397	-0.655993	4.77502	-6.76678	6.17703e-07	7.65621e-06	5.8594	Uncharacterized protein n_2 Tax_Medicago truncatula RepID_G7L326_MEDTR	AT5G39510.1		Medtr7g011570.2	vesicle transport V-SNARE protein amine-terminal protein
Ca26971	Ca3	43503602	43512936	-0.419333	4.49553	-5.06731	3.78686e-05	0.000196873	1.73686	Uncharacterized protein n_18 Tax_fabids RepID_I1N4G7_SOYBN	AT3G01090.2	SNF1 kinase homolog 10	Medtr6g012990.1	SNF1-related kinase catalytic subunit alpha KIN11
Ca26969	Ca3	43562486	43568430	-0.853958	4.79038	-7.08364	2.97153e-07	4.53136e-06	6.59702	PREDICTED: probable WRKY transcription factor 4 n_1 Tax_Cicer arietinum RepID_UPI00032AC7A3	AT1G13960.2	WRKY DNA-binding protein 4	Medtr7g011820.1	WRKY transcription factor 3
Ca26987	Ca3	43657811	43664247	1.49765	7.08544	6.90437	4.48854e-07	6.19605e-06	6.17951	Cyclic nucleotide-gated ion channel protein - putative n_2 Tax_Papilionoideae RepID_G7L453_MEDTR	AT5G15410.2	Cyclic nucleotide-regulated	Medtr7g012260.1	cyclic nucleotide-gated ion channel protein%2C putative
Ca26991	Ca3	43787558	43789780	-0.723488	2.90805	-4.76952	7.97658e-05	0.000364402	1.16431	Circadian clock coupling factor ZGT n_10 Tax_Papilionoideae RepID_B7FI24_MEDTR	AT5G39360.1	EID1-like 2	Medtr7g012790.3	circadian clock coupling factor ZGT
Ca27061	Ca3	44401065	44406024	-0.73173	3.06375	-6.95324	4.00961e-07	5.71547e-06	6.41889	Chromosome condensation regulator RCC1 repeat protein n_3 Tax_Papilionoideae RepID_G7KR17_MEDTR	AT3G02300.1	Regulator of chromosome condensation	Medtr7g016640.2	chromosome condensation regulator RCC1 repeat protein
Ca27020	Ca3	44608473	44610587	-1.15288	2.99363	-5.34759	1.88643e-05	0.000112094	2.61792	PREDICTED: UDP-glycosyltransferase 83A1-like n_1 Tax_Cicer arietinum RepID_UPI00032AD1D0	AT3G02100.1	UDP-Glycosyltransferase superfamily	Medtr7g013180.1	UDP-glucosyltransferase family protein
Ca27192	Ca3	44744321	44813361	-1.36476	6.56988	-8.30174	2.01565e-08	7.46473e-07	9.31259	PREDICTED: copper transport protein CCH-like n_1 Tax_Cicer arietinum RepID_UPI00032AC7A2	AT5G45910.1	GDSL-like Lipase/Acylhydrolase superfamily	Medtr6g045307.1	IPP transferase
Ca27084	Ca3	44947148	44958180	-1.30081	4.89233	-8.26909	2.16081e-08	7.86895e-07	9.24066	Carboxypeptidase n_2 Tax_Papilionoideae RepID_A0A072TVX1_MEDTR	AT3G02110.1	serine carboxypeptidase-like	Medtr7g013790.1	serine carboxypeptidase-like protein
Ca27078	Ca3	45052146	45056085	3.41769	1.85457	4.79607	7.46287e-05	0.000345161	1.50161	PREDICTED: ninja-family protein AFP3 n_1 Tax_Cicer arietinum RepID_UPI00032A560A	AT3G29575.4	ABI five binding protein 3	Medtr7g013820.1	ABI five-binding protein
Ca27067	Ca3	45240426	45241887	-1.10179	5.62062	-9.80939	9.45486e-10	9.97325e-08	12.3941	PREDICTED: malonyl-CoA:anthocyanidin 5-O-glucoside-6''''''''-O-malonyltransferase-like n_1 Tax_Cicer arietinum RepID_UPI00032A8D34	AT5G39090.1	HXXXD-type acyl-transferase family	Medtr7g014330.1	anthocyanin 5-aromatic acyltransferase
Ca27101	Ca3	45641081	45642945	-1.99983	2.58229	-7.17466	2.41395e-07	3.92781e-06	6.99264	PREDICTED: pirin-like protein isoform X1 n_3 Tax_Cicer arietinum RepID_UPI00032A53CC	AT3G59220.1	pirin	Medtr7g405830.2	pirin-like plant protein
Ca27095	Ca3	45654798	45658211	0.498617	2.42532	5.07069	3.75506e-05	0.000195485	2.00018	PREDICTED: FBD-associated F-box protein At4g10400-like n_1 Tax_Cicer arietinum RepID_UPI00032AC052	AT3G14710.1	RNI-like superfamily protein	Medtr7g094030.1	F-box/RNI/FBD-like domain protein
Ca27097	Ca3	45664655	45668033	1.22787	5.79916	5.28414	2.20774e-05	0.000127424	2.26498	General substrate transporter n_4 Tax_Papilionoideae RepID_A2Q2S7_MEDTR	AT2G43330.1	inositol transporter 1	Medtr7g005910.1	MFS/sugar transporter
Ca27090	Ca3	45824903	45826302	0.83453	3.86083	5.02547	4.20367e-05	0.000214675	1.68425	PREDICTED: 60S acidic ribosomal protein P1-2-like n_2 Tax_Cicer arietinum RepID_UPI00032A6A18			Medtr8g024350.1	60S acidic ribosomal protein
Ca27092	Ca3	45825914	45830365	-0.960133	5.52754	-6.31752	1.78072e-06	1.74032e-05	4.78963	Starch synthase - chloroplastic/amyloplastic n_4 Tax_Papilionoideae RepID_Q93YB1_PEA	AT1G32900.1	UDP-Glycosyltransferase superfamily	Medtr1g078000.2	granule bound starch synthase I%2C putative
Ca27137	Ca3	46094068	46097012	-0.659658	6.32915	-4.97518	4.76638e-05	0.000237853	1.49993	PREDICTED: uncharacterized protein LOC101506721 n_1 Tax_Cicer arietinum RepID_UPI00032A967F	AT2G36835.1	unknown protein; FUNCTIONS IN: molecular_function	Medtr7g102930.1	hypothetical protein
Ca27139	Ca3	46158123	46159573	0.990653	10.2023	6.64389	8.23206e-07	9.48828e-06	5.48042	Probable aquaporin TIP-type n_7 Tax_Papilionoideae RepID_TIP1_MEDSA	AT2G36830.1	gamma	Medtr7g103030.1	tonoplast intrinsic protein
Ca27181	Ca3	46200907	46207108	3.15562	2.74644	7.23226	2.1176e-07	3.60677e-06	7.16432	Transducin family protein/WD-40 repeat protein n_2 Tax_Papilionoideae RepID_A0A072USV0_MEDTR	AT3G21540.1	transducin family protein / WD-40 repeat	Medtr4g123597.1	transducin family protein/WD-40 repeat protein
Ca27162	Ca3	46375612	46379191	-0.422898	4.94464	-5.5175	1.23979e-05	7.92912e-05	2.84189	Ribosomal protein S6 family protein n_2 Tax_Papilionoideae RepID_B7FMI2_MEDTR	AT3G18760.2	Translation elongation factor EF1B/ribosomal	Medtr7g103190.1	ribosomal protein S6 family protein
Ca27147	Ca3	46414649	46418278	1.30875	6.29018	5.61844	9.67221e-06	6.54586e-05	3.09246	Sulfite exporter TauE/SafE family protein n_4 Tax_Papilionoideae RepID_A0A072UE30_MEDTR	AT2G36630.1	Sulfite exporter TauE/SafE family protein	Medtr7g103300.1	sulfite exporter TauE/SafE family protein
Ca27146	Ca3	46422560	46424674	1.03425	6.31992	6.85841	4.99245e-07	6.67478e-06	6.07381	60S ribosomal protein L24 n_4 Tax_Pentapetalae RepID_RL24_CICAR	AT2G36620.1	ribosomal protein L24	Medtr1g061670.1	60S ribosomal protein L24-2
Ca27144	Ca3	46477413	46479145	-1.80029	3.49222	-9.65895	1.26641e-09	1.26477e-07	12.1589	PREDICTED: cytochrome P450 76A1 n_1 Tax_Cicer arietinum RepID_UPI00032ABDEA	AT1G33730.1	cytochrome P450, family 76,	Medtr7g103450.1	cytochrome P450 family protein
Ca27158	Ca3	46521718	46526657	0.823908	8.66522	5.62329	9.5579e-06	6.4886e-05	3.0729	Uncharacterized protein n_1 Tax_Phaseolus angularis RepID_A0A0L9TF32_PHAAN	AT2G36530.1	Enolase	Medtr7g103620.1	phosphopyruvate hydratase
Ca27154	Ca3	46531066	46533656	0.402486	5.03449	5.09034	3.57546e-05	0.000188185	1.7825	Splicing factor U2af small subunit A-like protein n_3 Tax_Papilionoideae RepID_A0A072U424_MEDTR	AT1G27650.1	U2 snRNP auxiliary factor	Medtr7g103630.1	splicing factor U2af small subunit A-like protein
Ca27153	Ca3	46544123	46550079	0.557866	5.05064	5.41671	1.58988e-05	9.723e-05	2.59309	PREDICTED: polyadenylation and cleavage factor homolog 4-like n_1 Tax_Cicer arietinum RepID_UPI000641289B	AT2G36480.1	ENTH/VHS family protein	Medtr7g103840.2	ENTH/VHS-like protein
Ca27194	Ca3	46795874	46797305	-0.887684	5.18065	-7.18404	2.36293e-07	3.86948e-06	6.82447	PREDICTED: zinc finger A20 and AN1 domain-containing stress-associated protein 4-like n_1 Tax_Cicer arietinum RepID_UPI00032A5903	AT2G36320.1	A20/AN1-like zinc finger family protein	Medtr7g104320.1	zinc finger A20 and AN1 domain stress-associated protein
Ca27203	Ca3	46888133	46890810	-0.989941	4.8539	-5.74492	7.09554e-06	5.15126e-05	3.40709	PREDICTED: uncharacterized protein LOC101508117 n_1 Tax_Cicer arietinum RepID_UPI00032A68DC	AT3G52740.1	unknown protein; BEST Arabidopsis thaliana	Medtr7g104540.1	plant/F3C22-140 protein%2C putative
Ca27204	Ca3	46896696	46899258	-0.610997	5.07705	-4.95062	5.06828e-05	0.000250628	1.43325	Ubiquinol-cytochrome C reductase n_2 Tax_Papilionoideae RepID_G7L638_MEDTR	AT3G52730.1	ubiquinol-cytochrome C reductase UQCRX/QCR9-like	Medtr7g104570.1	ubiquinol-cytochrome C reductase
Ca27208	Ca3	46921466	46925415	-0.729595	6.06154	-5.86642	5.27663e-06	4.10144e-05	3.70125	PREDICTED: heme-binding-like protein At3g10130 - chloroplastic n_1 Tax_Cicer arietinum RepID_UPI00032A528A			Medtr7g104650.1	SOUL heme-binding family protein
Ca27207	Ca3	46955115	46957150	-0.637677	3.61923	-5.41278	1.60539e-05	9.80606e-05	2.65954	PREDICTED: F-box/kelch-repeat protein At1g57790-like n_1 Tax_Cicer arietinum RepID_UPI00032AC53F	AT1G57790.1	F-box family protein	Medtr1g059840.2	transcription regulation protein%2C putative
Ca27217	Ca3	47025847	47027871	-1.84631	5.19224	-7.80436	5.90512e-08	1.48795e-06	8.2254	PREDICTED: 1-aminocyclopropane-1-carboxylate oxidase homolog 4-like n_1 Tax_Cicer arietinum RepID_UPI00032AA591	AT1G03410.1	2-oxoglutarate (2OG) and Fe(II)-dependent	Medtr7g105070.1	desacetoxyvindoline 4-hydroxylase%2C putative
Ca27224	Ca3	47030954	47032034	1.22932	6.20628	7.34682	1.63414e-07	3.02961e-06	7.19971	PREDICTED: ubiquitin-60S ribosomal protein L40-like n_1 Tax_Nelumbo nucifera RepID_UPI00052E6C9E	AT3G52590.1	ubiquitin	Medtr3g092130.2	ubiquitin-60S ribosomal L40 fusion protein
Ca27227	Ca3	47063749	47071930	1.10711	4.0619	10.7921	1.49944e-10	3.09918e-08	14.2655	Peptidyl-prolyl cis-trans isomerase n_2 Tax_Glycine max RepID_K7MZ99_SOYBN	AT3G11530.2	Vacuolar protein sorting 55 (VPS55)	Medtr7g105200.1	vacuolar protein sorting 55 protein
Ca27219	Ca3	47072081	47075446	1.61121	0.1375	7.3022	1.80736e-07	3.23317e-06	7.17046	Fission ELM1 protein n_2 Tax_Papilionoideae RepID_A0A072UEB4_MEDTR	AT5G06180.2	Protein of unknown function (DUF1022)	Medtr7g105230.1	fission ELM1 protein
Ca27235	Ca3	47128376	47132108	-1.18915	5.4954	-4.89317	5.85167e-05	0.000282785	1.2901	PREDICTED: lysosomal Pro-X carboxypeptidase-like n_1 Tax_Cicer arietinum RepID_UPI00032AB657	AT2G24280.1	alpha/beta-Hydrolases superfamily protein	Medtr7g105390.2	lysosomal pro-X carboxypeptidase-like protein
Ca27228	Ca3	47140251	47143525	-1.09843	2.86829	-7.66995	7.94043e-08	1.8263e-06	8.06275	PREDICTED: uncharacterized protein LOC101495425 n_1 Tax_Cicer arietinum RepID_UPI00032A9AEE	AT3G11590.1	unknown protein; LOCATED IN: plasma	Medtr7g105430.1	plant/F24K9-26 protein
Ca27240	Ca3	47242860	47246048	0.892071	8.41661	8.32982	1.89882e-08	7.151e-07	9.35325	1-cys peroxiredoxin PER1 n_3 Tax_Papilionoideae RepID_G7ZUV5_MEDTR	AT3G11630.1	Thioredoxin superfamily protein	Medtr7g105830.1	1-cys peroxiredoxin PER1
Ca27270	Ca3	47330424	47334681	-0.757689	2.44796	-4.75908	8.18813e-05	0.000371735	1.2238	PREDICTED: mediator of RNA polymerase II transcription subunit 27 n_1 Tax_Cicer arietinum RepID_UPI00032A69E7			Medtr7g106200.1	mediator of RNA polymerase II transcription subunit 27
Ca27271	Ca3	47337009	47340993	0.697427	6.55877	5.11309	3.37828e-05	0.000179475	1.84274	PREDICTED: probable receptor protein kinase TMK1 n_1 Tax_Cicer arietinum RepID_UPI00032A7428	AT2G01820.1	Leucine-rich repeat protein kinase	Medtr7g106210.1	receptor-kinase-like protein
Ca27267	Ca3	47351123	47356877	-1.4176	6.51995	-11.2408	6.71485e-11	1.87095e-08	15.0537	Digalactosyldiacylglycerol synthase 1 - chloroplastic n_2 Tax_Papilionoideae RepID_DGDG1_LOTJA	AT3G11670.1	UDP-Glycosyltransferase superfamily	Medtr7g106250.1	digalactosyldiacylglycerol synthase
Ca27260	Ca3	47394002	47399190	0.578392	6.65429	5.43016	1.53788e-05	9.47696e-05	2.62958	PREDICTED: BEL1-like homeodomain protein 1 n_1 Tax_Cicer arietinum RepID_UPI00032ACF21	AT2G35940.3	BEL1-like homeodomain 1	Medtr7g106320.3	BEL1-related homeotic protein
Ca27265	Ca3	47400552	47402237	-0.613984	5.04861	-5.256	2.36752e-05	0.000134915	2.19343	PREDICTED: BTB/POZ domain-containing protein At3g05675 n_1 Tax_Cicer arietinum RepID_UPI00032A86D9	AT3G05675.1	BTB/POZ domain-containing protein	Medtr7g106330.1	BTB/POZ domain plant-like protein
Ca27263	Ca3	47455242	47457599	0.719704	7.72657	8.7724	7.51327e-09	3.84333e-07	10.301	PREDICTED: 33 kDa ribonucleoprotein - chloroplastic n_1 Tax_Cicer arietinum RepID_UPI00032ABE6F	AT3G52380.1	chloroplast RNA-binding	Medtr7g106440.1	33 kDa ribonucleoprotein
Ca27278	Ca3	47529840	47531368	-0.535202	4.65799	-5.21846	2.59894e-05	0.000145982	2.10759	PREDICTED: uncharacterized protein LOC101508746 n_1 Tax_Cicer arietinum RepID_UPI00032AC37F	AT2G35900.1	unknown protein; FUNCTIONS IN: molecular_function	Medtr7g106660.1	Mal D 1-associated protein
Ca27296	Ca3	47621922	47623915	1.04688	5.47095	7.91663	4.61967e-08	1.25502e-06	8.47303	60S ribosomal L35a-1-like protein n_3 Tax_rosids RepID_A0A0B0N9V3_GOSAR	AT3G55750.1	Ribosomal protein L35Ae family protein	Medtr0699s0020.1	60S ribosomal protein L35a-3
Ca27302	Ca3	47645274	47655628	0.632508	6.34642	6.44752	1.30759e-06	1.36889e-05	5.10484	PREDICTED: D-lactate dehydrogenase [cytochrome] - mitochondrial n_1 Tax_Cicer arietinum RepID_UPI00032A54E2	AT5G06580.1	FAD-linked oxidases family protein	Medtr7g107050.1	D-lactate dehydrogenase (cytochrome)
Ca27307	Ca3	47748084	47751325	-0.392705	3.5305	-4.98994	4.59379e-05	0.00023067	1.62194	PREDICTED: hemK methyltransferase family member 1 n_1 Tax_Cicer arietinum RepID_UPI00032AAD06	AT5G64150.1	RNA methyltransferase family protein	Medtr7g107330.1	release factor glutamine methyltransferase
Ca27308	Ca3	47785232	47786777	0.709998	6.54416	5.02241	4.23591e-05	0.000215817	1.61676	Uncharacterized protein n_13 Tax_Papilionoideae RepID_C6SZS1_SOYBN	AT1G09690.1	Translation protein SH3-like family	Medtr1g069905.1	60S ribosomal L21-like protein
Ca27315	Ca3	47887009	47889097	-1.23527	2.86547	-4.91289	5.56982e-05	0.000271826	1.53007	PREDICTED: CASP-like protein 1E1 n_1 Tax_Cicer arietinum RepID_UPI00032A6984	AT4G15630.1	Uncharacterised protein family (UPF0497)	Medtr7g108130.1	plant integral membrane protein
Ca27335	Ca3	47917547	47921741	0.383267	4.43287	4.96954	4.83411e-05	0.000240761	1.49824	OTU-like cysteine protease n_4 Tax_Papilionoideae RepID_G7KRS0_MEDTR	AT3G62940.1	Cysteine proteinases superfamily protein	Medtr7g108240.1	OTU-like cysteine protease
Ca27338	Ca3	47928418	47928735	-4.62828	2.60176	-6.1065	2.9519e-06	2.59778e-05	4.55792	PREDICTED: monothiol glutaredoxin-S6-like n_1 Tax_Cicer arietinum RepID_UPI00032AD1BE	AT3G62930.1	Thioredoxin superfamily protein	Medtr7g108260.1	monothiol glutaredoxin-S2 protein
Ca27381	Ca3	48089677	48094104	0.732491	2.54585	5.33244	1.95857e-05	0.000115527	2.62997	Alpha-1 -3-mannosyltransferase - putative n_2 Tax_Papilionoideae RepID_G7KRV5_MEDTR	AT2G47760.3	asparagine-linked glycosylation	Medtr7g108620.1	alpha-1%2C3-mannosyltransferase%2C putative
Ca27378	Ca3	48104250	48108260	2.06762	3.66929	5.88876	4.99783e-06	3.93624e-05	3.84643	Uncharacterized protein n_1 Tax_Medicago truncatula RepID_I3SNI1_MEDTR	AT1G02880.4	thiamin pyrophosphokinase1	Medtr8g058563.1	thiaminepyrophosphokinase
Ca27384	Ca3	48115783	48120229	1.03934	2.77414	6.37689	1.54609e-06	1.56295e-05	5.12223	PREDICTED: WD repeat-containing protein 89 homolog n_1 Tax_Cicer arietinum RepID_UPI00032AB088	AT2G47790.1	Transducin/WD40 repeat-like superfamily	Medtr7g108870.1	transducin/WD40 repeat protein
Ca27376	Ca3	48134714	48136405	-1.32272	6.03332	-7.81767	5.7353e-08	1.45475e-06	8.25614	PREDICTED: universal stress protein A-like protein n_1 Tax_Cicer arietinum RepID_UPI00032AD23D	AT2G47710.1	Adenine nucleotide alpha hydrolases-like	Medtr7g108830.1	universal stress family protein
Ca27380	Ca3	48164330	48169593	-1.00662	0.882376	-4.80564	7.28591e-05	0.000338203	1.63009	PREDICTED: caffeoylshikimate esterase-like isoform X1 n_1 Tax_Cicer arietinum RepID_UPI00032A992B	AT2G47630.1	alpha/beta-Hydrolases superfamily protein	Medtr7g108770.1	alpha/beta hydrolase family protein
Ca27379	Ca3	48175172	48181188	0.550908	4.84111	4.82311	6.97396e-05	0.000326298	1.12139	PREDICTED: uncharacterized protein C57A7.06 n_1 Tax_Cicer arietinum RepID_UPI0006415ED3	AT4G02400.1	U3 ribonucleoprotein (Utp) family protein	Medtr7g108730.1	U3 small nucleolar RNA-associated-like protein
Ca27391	Ca3	48217447	48219507	1.04285	6.53489	7.71404	7.20334e-08	1.70286e-06	8.0266	60S ribosomal protein L18-2 n_2 Tax_Soja RepID_A0A0B2QKI0_GLYSO	AT3G05590.1	ribosomal protein L18	Medtr7g108805.1	60S ribosomal protein L18-3
Ca27395	Ca3	48222008	48224781	-0.561594	4.17037	-5.7219	7.5064e-06	5.36497e-05	3.3734	Epoxide hydrolase n_4 Tax_Papilionoideae RepID_A0A072UF47_MEDTR	AT4G02340.1	alpha/beta-Hydrolases superfamily protein	Medtr7g108825.2	epoxide hydrolase
Ca27399	Ca3	48262608	48267914	1.88036	5.22101	5.71631	7.60962e-06	5.42505e-05	3.34033	Sucrose synthase 2 n_4 Tax_Papilionoideae RepID_SUS2_PEA	AT4G02280.1	sucrose synthase 3	Medtr1g088170.1	sucrose synthase
Ca27394	Ca3	48286420	48288404	0.552903	6.97442	6.31399	1.79578e-06	1.75281e-05	4.78434	Ribosomal protein L19 n_9 Tax_rosids RepID_I3SA92_MEDTR	AT4G02230.1	Ribosomal protein L19e family protein	Medtr7g108955.2	60S ribosomal protein L19
Ca27366	Ca3	48328633	48330586	0.522168	5.14065	4.88083	6.03527e-05	0.000289735	1.25995	PREDICTED: probable galacturonosyltransferase-like 7 n_1 Tax_Cicer arietinum RepID_UPI00032A8EF2	AT3G62660.1	galacturonosyltransferase-like	Medtr7g109210.1	CAZy family GT8 glycosyltransferase
Ca27364	Ca3	48361231	48364963	1.3122	1.04373	5.51296	1.25372e-05	8.00316e-05	3.30723	PREDICTED: transcription factor MYB12-like n_1 Tax_Cicer arietinum RepID_UPI00032AA373	AT5G49330.1	myb domain protein	Medtr7g109320.1	myb transcription factor
Ca27370	Ca3	48398358	48401718	1.07864	5.3224	5.61711	9.70396e-06	6.55864e-05	3.08735	DnaJ heat shock amino-terminal domain protein n_3 Tax_Papilionoideae RepID_G7KSS0_MEDTR	AT2G47440.1	Tetratricopeptide repeat (TPR)-like	Medtr7g109360.5	DnaJ heat shock amine-terminal domain protein
Ca27372	Ca3	48446921	48454813	-0.820401	1.66764	-5.40306	1.64443e-05	9.9887e-05	2.94879	PREDICTED: DNA mismatch repair protein MSH6 n_1 Tax_Cicer arietinum RepID_UPI00032ABF84	AT4G02070.1	MUTS homolog 6	Medtr7g109470.1	DNA mismatch repair MSH3-like protein
Ca27405	Ca3	48484898	48491490	0.727284	8.32024	6.1206	2.85338e-06	2.52707e-05	4.29869	Glutamyl endopeptidase - putative n_7 Tax_Papilionoideae RepID_G7KST7_MEDTR	AT2G47390.1	Prolyl oligopeptidase family protein	Medtr7g109530.4	glutamyl endopeptidase%2C putative
Ca27406	Ca3	48521689	48523981	-1.49482	1.1084	-5.39135	1.69276e-05	0.000102173	3.01389	PREDICTED: probable WRKY transcription factor 69 n_1 Tax_Cicer arietinum RepID_UPI00032A6388			Medtr7g109600.2	WRKY family transcription factor
Ca27407	Ca3	48551582	48569074	0.666744	5.29848	5.92451	4.58235e-06	3.67718e-05	3.84012	Carbohydrate-binding-like fold protein n_2 Tax_Papilionoideae RepID_G7KTM5_MEDTR	AT3G62360.1	Carbohydrate-binding-like fold	Medtr7g109730.1	carbohydrate-binding-like fold protein
Ca27415	Ca3	48717598	48723737	-3.18231	0.281525	-5.5045	1.28012e-05	8.13098e-05	3.29135	PREDICTED: short-chain dehydrogenase reductase 3b-like isoform X1 n_2 Tax_Cicer arietinum RepID_UPI00032AB435	AT2G47140.1	NAD(P)-binding Rossmann-fold superfamily	Medtr7g110140.1	short-chain dehydrogenase/reductase
Ca27414	Ca3	48733772	48744783	1.46462	1.42444	5.40611	1.63207e-05	9.94127e-05	3.02287	PREDICTED: uncharacterized protein LOC101511417 isoform X1 n_2 Tax_Cicer arietinum RepID_UPI00032A677E	AT4G01860.2	Transducin family protein / WD-40 repeat	Medtr7g110260.1	transducin/WD-like repeat-protein
Ca27444	Ca3	48792625	48795143	-0.654159	3.43296	-5.59033	1.03638e-05	6.86801e-05	3.1185	Chaperone DnaJ domain protein n_2 Tax_Papilionoideae RepID_A4PU34_MEDTR			Medtr7g110410.1	chaperone DnaJ domain protein
Ca27449	Ca3	48898287	48899920	-0.89858	3.74347	-4.81857	7.05372e-05	0.000329626	1.17824	PREDICTED: uncharacterized protein LOC101492848 n_1 Tax_Cicer arietinum RepID_UPI00032A9155	AT3G62070.1	unknown protein; BEST Arabidopsis thaliana	Medtr7g110880.1	hypothetical protein
Ca27480	Ca3	48985728	48990702	0.98868	8.43979	7.37435	1.53584e-07	2.90223e-06	7.24003	Helicase - C-terminal: Zinc finger - CCHC-type: GUCT n_2 Tax_Papilionoideae RepID_Q2HUZ8_MEDTR	AT5G26742.3	DEAD box RNA helicase (RH3)	Medtr5g090120.1	DEAD-box ATP-dependent RNA helicase-like protein
Ca27484	Ca3	49118367	49119740	-0.428399	4.32808	-5.18254	2.84182e-05	0.00015652	2.03143	PREDICTED: probable L-cysteine desulfhydrase - chloroplastic n_1 Tax_Cicer arietinum RepID_UPI00032ABC54	AT5G26600.1	Pyridoxal phosphate (PLP)-dependent	Medtr7g111540.1	isopenicillin N epimerase-like protein
Ca27493	Ca3	49180796	49184230	0.75503	2.98759	6.78772	5.88318e-07	7.42436e-06	6.05054	PREDICTED: 50S ribosomal protein L21 - mitochondrial n_1 Tax_Cicer arietinum RepID_UPI00032ABDE1			Medtr7g111750.1	50S ribosomal protein L21%2C related protein
Ca27472	Ca3	49242831	49243289	-0.943008	3.26103	-5.38498	1.71964e-05	0.00010347	2.63662	PREDICTED: uncharacterized protein LOC101506609 n_1 Tax_Cicer arietinum RepID_UPI00032A7EC0	AT1G09310.1	Protein of unknown function, DUF538	Medtr7g111900.1	plant/F25P12-18 protein
Ca27459	Ca3	49282720	49287577	-0.74983	4.36908	-5.40532	1.63525e-05	9.95668e-05	2.58486	PREDICTED: uncharacterized protein LOC101508207 n_1 Tax_Cicer arietinum RepID_UPI00032AA8FA	AT3G58650.1	unknown protein; FUNCTIONS IN: molecular_function	Medtr7g112030.1	DUF4378 domain protein
Ca27520	Ca3	49319066	49320022	-2.43951	6.00027	-6.28303	1.93342e-06	1.86219e-05	4.70953	PREDICTED: nicotianamine synthase-like n_1 Tax_Cicer arietinum RepID_UPI00032ACE44	AT5G04950.1	nicotianamine synthase	Medtr7g112130.1	nicotianamine synthase-like protein
Ca27503	Ca3	49428178	49431234	-0.669376	4.15666	-5.2833	2.21235e-05	0.000127546	2.29236	PREDICTED: bromodomain adjacent to zinc finger domain protein 1A n_1 Tax_Cicer arietinum RepID_UPI00032A9E6B	AT3G05670.1	RING/U-box protein	Medtr7g112410.2	poxvirus Ag35 surface protein
Ca27514	Ca3	49509128	49512681	-1.18352	5.8915	-7.2572	2.00118e-07	3.45345e-06	6.99457	PREDICTED: probable protein phosphatase 2C 34 n_1 Tax_Cicer arietinum RepID_UPI00032A5040	AT5G27930.2	Protein phosphatase 2C family protein	Medtr7g112490.1	protein phosphatase 2C family protein
Ca27512	Ca3	49528488	49530056	0.896623	2.42494	5.29384	2.15524e-05	0.000124865	2.55656	PREDICTED: F-box protein VBF-like n_1 Tax_Cicer arietinum RepID_UPI00032A722E	AT1G56250.1	phloem protein 2-B14	Medtr7g112550.1	F-box protein PP2-A13
Ca27644	Ca3	49617360	49620475	-0.765252	3.34114	-5.68165	8.28349e-06	5.78256e-05	3.35528	Serine/threonine-protein phosphatase n_6 Tax_Phaseoleae RepID_I1JR93_SOYBN	AT3G05580.1	Calcineurin-like metallo-phosphoesterase	Medtr7g112870.1	serine/threonine-protein phosphatase PP1
Ca27652	Ca3	49625528	49627551	-1.91313	5.78906	-5.65598	8.82129e-06	6.0639e-05	3.18406	PREDICTED: uncharacterized protein LOC101493722 isoform X2 n_1 Tax_Cicer arietinum RepID_UPI00032AA164			Medtr7g112860.3	dormancy/auxin associated protein
Ca27647	Ca3	49647771	49649208	0.654258	6.2708	5.68512	8.21328e-06	5.74141e-05	3.25768	Putative uncharacterized protein n_70 Tax_eudicotyledons RepID_D7U2A1_VITVI	AT3G05560.3	Ribosomal L22e protein family	Medtr7g112770.1	ribosomal L22e family protein
Ca27654	Ca3	49685591	49689433	-0.881402	2.73095	-5.47181	1.3876e-05	8.70164e-05	2.9297	PREDICTED: uncharacterized protein LOC101497501 n_1 Tax_Cicer arietinum RepID_UPI00032ACC43	AT5G27710.1	unknown protein; Has 49 Blast hits	Medtr7g112650.1	hypothetical protein
Ca27541	Ca3	49714037	49715635	-0.935665	3.36291	-6.68204	7.52842e-07	8.84387e-06	5.75369	PREDICTED: uncharacterized protein LOC101499471 n_1 Tax_Cicer arietinum RepID_UPI00032A7FAF			Medtr7g113110.1	heavy metal transport/detoxification superfamily protein
Ca27537	Ca3	49736910	49742170	1.22084	2.58029	8.12971	2.91243e-08	9.62109e-07	9.09852	PREDICTED: putative protease Do-like 14 isoform X1 n_2 Tax_Cicer arietinum RepID_UPI00032A8F77	AT5G27660.1	Trypsin family protein with PDZ domain	Medtr7g113170.1	trypsin-like serine protease
Ca27542	Ca3	49783806	49787158	1.90577	2.15379	7.28146	1.89417e-07	3.33941e-06	7.30344	PREDICTED: uncharacterized protein LOC101502432 isoform X1 n_2 Tax_Cicer arietinum RepID_UPI00032A714B	AT1G55040.1	zinc finger (Ran-binding) family protein	Medtr7g113360.1	zinc finger (Ran-binding) family protein
Ca27531	Ca3	49807469	49812513	-0.96973	4.14138	-5.93051	4.51616e-06	3.64437e-05	3.88537	PREDICTED: probable linoleate 9S-lipoxygenase 5 n_1 Tax_Cicer arietinum RepID_UPI00032A50FD	AT1G55020.1	lipoxygenase 1	Medtr7g113410.1	linoleate 9S-lipoxygenase-like protein
Ca27528	Ca3	49818506	49821503	0.828241	4.13937	6.34753	1.65788e-06	1.65626e-05	4.89839	PREDICTED: protein AUXIN RESPONSE 4 n_1 Tax_Cicer arietinum RepID_UPI00032AB6E3	AT1G54990.1	alpha/beta-Hydrolases	Medtr7g113420.2	alpha/beta hydrolase family protein
Ca27558	Ca3	49924900	49927683	-0.478291	2.88204	-4.81437	7.12823e-05	0.000332317	1.2789	PREDICTED: signal peptidase complex subunit 3B n_1 Tax_Cicer arietinum RepID_UPI00032A89C5	AT5G27430.1	Signal peptidase subunit	Medtr7g113740.1	signal peptidase complex subunit 3B-like protein
Ca27556	Ca3	49967660	49970056	-1.28767	3.36221	-4.8324	6.81345e-05	0.000319766	1.25463	UPI00077292F6 related cluster n_2 Tax_unknown RepID_UPI00077292F6	AT1G54790.2	GDSL-like Lipase/Acylhydrolase superfamily	Medtr7g113860.3	GDSL-like lipase/acylhydrolase
Ca27569	Ca3	50023406	50027461	-0.767306	4.29246	-4.83115	6.83489e-05	0.000320674	1.15988	PREDICTED: sugar transporter ERD6-like 5 n_1 Tax_Cicer arietinum RepID_UPI000640D7F9	AT1G54730.2	Major facilitator superfamily protein	Medtr7g113960.1	sugar porter (SP) family MFS transporter
Ca27571	Ca3	50105198	50108772	0.713613	6.32239	4.98917	4.6026e-05	0.000231036	1.53398	Superoxide dismutase [Cu-Zn] n_10 Tax_Mesangiospermae RepID_SODC_PEA			Medtr7g114240.2	superoxide dismutase [Cu-Zn] protein
Ca27574	Ca3	50163787	50171296	-1.26216	6.18061	-11.2331	6.80609e-11	1.87095e-08	15.0399	PREDICTED: acyltransferase-like protein At1g54570 - chloroplastic n_1 Tax_Cicer arietinum RepID_UPI00032A5C0C	AT1G54570.1	Esterase/lipase/thioesterase family	Medtr7g114340.1	esterase/lipase/thioesterase-like protein
Ca27589	Ca3	50200282	50202136	4.20081	2.64064	6.23541	2.16648e-06	2.0379e-05	4.88694	PREDICTED: uncharacterized protein LOC101492518 n_1 Tax_Cicer arietinum RepID_UPI00032ABC45	AT3G22560.1	Acyl-CoA N-acyltransferases (NAT) superfamily	Medtr7g114410.1	acetyltransferase (GNAT) domain protein
Ca27586	Ca3	50217947	50238572	-0.413129	7.74171	-4.79493	7.48421e-05	0.000345834	1.04133	Proteasome subunit beta type n_13 Tax_Papilionoideae RepID_I1JRK8_SOYBN	AT1G54490.1	exoribonuclease	Medtr7g114570.2	5'-3' exoribonuclease
Ca27584	Ca3	50247899	50249921	1.02493	6.92903	6.22435	2.22456e-06	2.07341e-05	4.56846	Uncharacterized protein (Fragment) n_1 Tax_Cynara cardunculus var. scolymus RepID_A0A103Y7K3_CYNCS	AT5G28060.1	Ribosomal protein S24e family protein	Medtr1g081410.1	40S ribosomal protein S24-2
Ca27581	Ca3	50251676	50257597	-0.795194	7.21076	-8.40937	1.6043e-08	6.34052e-07	9.54052	PREDICTED: uncharacterized protein LOC101495636 n_1 Tax_Cicer arietinum RepID_UPI00032A4FE1	AT1G54520.1	unknown protein; FUNCTIONS IN: molecular_function	Medtr7g114660.1	plant/F20D21-34 protein
Ca27599	Ca3	50324246	50330151	-0.666987	3.84409	-7.97574	4.06222e-08	1.18121e-06	8.64456	PREDICTED: peptide-N(4)-(N-acetyl-beta-glucosaminyl)asparagine amidase n_1 Tax_Cicer arietinum RepID_UPI00032A888A	AT5G49570.1	peptide-N-glycanase 1	Medtr7g114940.1	peptide-N(4)-(N-acetyl-beta-glucosaminyl)asparagine amidase
Ca27590	Ca3	50339268	50341190	-0.723121	3.48772	-5.17477	2.89726e-05	0.000158887	2.08608	PREDICTED: protein ECERIFERUM 1-like n_1 Tax_Cicer arietinum RepID_UPI00032A7563	AT4G29250.1	HXXXD-type acyl-transferase family	Medtr7g114960.1	HXXXD-type acyl-transferase family protein
Ca27593	Ca3	50363931	50366801	1.25223	3.78189	4.78756	7.62374e-05	0.000351114	1.10083	PREDICTED: uncharacterized protein LOC101501040 n_1 Tax_Cicer arietinum RepID_UPI00032A6BE4	AT5G28830.1	calcium-binding EF hand family protein	Medtr7g115070.1	calcium-binding EF hand protein%2C putative
Ca27594	Ca3	50383934	50386971	-1.3319	2.52612	-5.33907	1.92664e-05	0.000113943	2.64296	PREDICTED: light-inducible protein CPRF2 n_1 Tax_Cicer arietinum RepID_UPI00032ABE97			Medtr7g115120.1	transcription factor bZIP88
Ca27624	Ca3	50427930	50438135	1.70929	2.32381	6.35371	1.63369e-06	1.63851e-05	5.15818	PREDICTED: ankyrin-1 n_1 Tax_Cicer arietinum RepID_UPI000641441C	AT3G04710.3	ankyrin repeat family protein	Medtr7g115280.1	ankyrin repeat protein
Ca27622	Ca3	50443831	50448331	0.737274	4.89836	7.18587	2.35313e-07	3.86609e-06	6.8357	PREDICTED: uncharacterized protein LOC101504355 n_1 Tax_Cicer arietinum RepID_UPI00032ACA2C	AT3G04650.1	FAD/NAD(P)-binding oxidoreductase family	Medtr7g115310.1	FAD/NAD(P)-binding oxidoreductase family protein
Ca27615	Ca3	50466363	50471989	0.975682	4.7629	7.16307	2.4785e-07	3.98201e-06	6.78462	PREDICTED: flowering locus K homology domain isoform X1 n_2 Tax_Cicer arietinum RepID_UPI00032A9CC6	AT3G04610.1	RNA-binding KH domain-containing	Medtr7g115340.2	poly(rC)-binding-like protein
Ca27608	Ca3	50563029	50565322	-2.62291	1.32741	-7.40254	1.44148e-07	2.80502e-06	7.59212	PREDICTED: peroxygenase 2-like n_1 Tax_Cicer arietinum RepID_UPI00032A759D	AT2G33380.1	Caleosin-related family	Medtr7g115490.1	caleosin CLO1-1
Ca27633	Ca3	50598616	50601589	1.18923	3.73563	6.42076	1.39318e-06	1.43493e-05	5.10689	PREDICTED: uncharacterized protein LOC101512623 n_1 Tax_Cicer arietinum RepID_UPI00032A74DB	AT5G28910.1	unknown protein; FUNCTIONS IN: molecular_function	Medtr7g115570.7	coatomer protein
Ca27637	Ca3	50604204	50607353	0.447675	4.98858	6.87786	4.77248e-07	6.45974e-06	6.11752	Ankyrin repeat 13B-like protein n_3 Tax_Papilionoideae RepID_A0A072U620_MEDTR	AT3G04470.1	Ankyrin repeat family protein	Medtr7g115580.3	ankyrin repeat 13B-like protein
Ca27635	Ca3	50683225	50684676	1.55894	4.54392	7.83013	5.58079e-08	1.42541e-06	8.31326	PREDICTED: peptidyl-prolyl cis-trans isomerase CYP19-3-like n_3 Tax_Maleae RepID_UPI0004987608	AT3G56070.2	rotamase cyclophilin 2	Medtr7g116340.1	peptidyl-prolyl cis-trans isomerase
Ca27642	Ca3	50726659	50754314	0.533005	6.35581	4.80336	7.32774e-05	0.000339733	1.07062	Translational activator GCN1-like protein n_2 Tax_Papilionoideae RepID_A0A072U5F0_MEDTR	AT1G64790.2	ILITYHIA	Medtr7g116425.1	translational activator GCN1-like protein
Ca27689	Ca3	50848591	50850742	-1.58476	2.2274	-7.58443	9.59863e-08	2.09171e-06	7.95213	PREDICTED: probable receptor-like protein kinase At5g18500 isoform X1 n_2 Tax_Cicer arietinum RepID_UPI000640F05C	AT5G48740.1	Leucine-rich repeat protein kinase	Medtr7g116650.1	tyrosine kinase family protein
Ca27701	Ca3	50877509	50881579	0.949507	3.72051	10.1195	5.22202e-10	6.76871e-08	13.0301	Uncharacterized protein n_5 Tax_Papilionoideae RepID_A0A0S3SH36_PHAAN			Medtr7g116720.1	rRNA-processing protein PIN domain protein
Ca27671	Ca3	50916073	50918265	5.0352	0.701929	6.61098	8.8929e-07	1.00828e-05	5.7624	Lanatoside 15-O-acetylesterase n_3 Tax_Papilionoideae RepID_G7L3Z5_MEDTR	AT4G01130.1	GDSL-like Lipase/Acylhydrolase superfamily	Medtr7g116870.1	lanatoside 15-O-acetylesterase
Ca27666	Ca3	50923116	50928418	1.1361	4.33793	8.22219	2.38845e-08	8.39655e-07	9.15805	PREDICTED: common plant regulatory factor 1-like n_1 Tax_Cicer arietinum RepID_UPI00032A5CCD	AT2G46270.2	G-box binding factor 3	Medtr7g116890.4	bZIP transcription factor family protein
Ca27663	Ca3	50948422	50957538	-0.486642	2.93043	-4.86104	6.34183e-05	0.000302081	1.38699	PREDICTED: mitochondrial carrier protein MTM1 isoform X1 n_2 Tax_Cicer arietinum RepID_UPI00032A7F34	AT2G46320.3	Mitochondrial substrate carrier family	Medtr7g117030.1	substrate carrier family protein
Ca27669	Ca3	50964650	50969518	0.77651	2.80272	6.73597	6.63704e-07	8.10177e-06	5.96211	Tubulin gamma-1 chain n_112 Tax_Embryophyta RepID_TBG1_ARATH	AT5G05620.1	gamma-tubulin complex	Medtr7g117050.1	tubulin
Ca27704	Ca3	51077153	51078572	1.54031	3.48494	7.78714	6.13262e-08	1.52518e-06	8.27009	PREDICTED: uncharacterized protein LOC101510355 isoform X1 n_2 Tax_Cicer arietinum RepID_UPI000641451E	AT3G61770.1	Acid phosphatase/vanadium-dependent	Medtr7g117385.1	acid phosphatase/vanadium-dependent haloperoxidase
Ca27680	Ca3	51169965	51173180	-0.556801	5.56779	-5.12131	3.30979e-05	0.000176265	1.8585	Transmembrane protein - putative n_1 Tax_Medicago truncatula RepID_A0A072U5P8_MEDTR	AT2G46550.1	unknown protein; BEST Arabidopsis thaliana	Medtr7g117715.1	transmembrane protein%2C putative
Ca27921	Ca3	51318095	51319383	1.22733	5.5377	7.37885	1.52039e-07	2.89593e-06	7.27239	PREDICTED: 60S acidic ribosomal protein P1-3-like n_1 Tax_Cicer arietinum RepID_UPI00032AAD44			#N/A	#N/A
Ca27923	Ca3	51322718	51323734	0.563654	2.31907	4.89023	5.89481e-05	0.00028451	1.57735	No Hits			#N/A	#N/A
Ca27910	Ca3	51350407	51355021	-0.887645	6.74892	-9.00438	4.66929e-09	2.86158e-07	10.7871	PREDICTED: two-component response regulator-like APRR9 n_1 Tax_Cicer arietinum RepID_UPI00032AB668	AT5G24470.1	pseudo-response regulator	Medtr7g118260.4	PRR response regulator
Ca27911	Ca3	51359285	51360473	-0.632279	10.0487	-7.24375	2.06313e-07	3.5416e-06	6.88545	PREDICTED: protein CURVATURE THYLAKOID 1B - chloroplastic-like n_1 Tax_Cicer arietinum RepID_UPI00032A6701			#N/A	#N/A
Ca27721	Ca3	51388209	51396686	-1.406	7.13215	-7.23243	2.11681e-07	3.60677e-06	6.93198	LATE ELONGATED HYPOCOTYL n_3 Tax_Cicer arietinum RepID_A0A023NE28_CICAR	AT1G01060.4	Homeodomain-like superfamily	Medtr7g118330.2	late elongated hypocotyl-like protein
Ca27723	Ca3	51397471	51400333	-1.75008	0.558143	-6.61724	8.76324e-07	9.96534e-06	5.83912	Inorganic pyrophosphatase n_1 Tax_Medicago truncatula RepID_Q2HTA8_MEDTR	AT1G01050.1	pyrophosphorylase 1	Medtr7g118340.1	soluble inorganic pyrophosphatase
Ca27718	Ca3	51437308	51438787	3.84364	1.384	7.30555	1.79371e-07	3.22005e-06	7.37884	PREDICTED: RNA-binding protein 24-like isoform X1 n_2 Tax_Cicer arietinum RepID_UPI00032AB2E6	AT1G76460.1	RNA-binding (RRM/RBD/RNP motifs) family	Medtr7g117495.1	RNA-binding (RRM/RBD/RNP motif) family protein
Ca27747	Ca3	51984225	51987764	-1.78435	0.707416	-7.40919	1.42011e-07	2.77048e-06	7.56455	PREDICTED: cysteine-rich repeat secretory protein 15 n_1 Tax_Cicer arietinum RepID_UPI00032ACBC1	AT3G60720.1	plasmodesmata-located protein	Medtr5g078030.1	salt stress response/antifungal domain protein
Ca27785	Ca3	52140400	52142257	1.06065	7.5345	7.1571	2.5125e-07	4.03052e-06	6.76085	Ribosomal protein L15 n_7 Tax_rosids RepID_I1MV28_SOYBN	AT4G16720.1	Ribosomal protein L23/L15e family protein	Medtr3g078653.1	60S ribosomal protein L15-1
Ca27809	Ca3	52614716	52618753	-0.94208	2.07928	-4.71087	9.24045e-05	0.000410612	1.17701	PREDICTED: alpha/beta hydrolase domain-containing protein 17C isoform X2 n_1 Tax_Cicer arietinum RepID_UPI00032A5BB6	AT5G14390.1	alpha/beta-Hydrolases superfamily protein	Medtr7g017430.1	alpha/beta-hydrolase superfamily protein
Ca27798	Ca3	52680221	52693634	2.58764	2.51602	8.37718	1.71735e-08	6.70072e-07	9.65295	PREDICTED: DNA-directed RNA polymerase 2 - chloroplastic/mitochondrial isoform X1 n_2 Tax_Cicer arietinum RepID_UPI00032A4E15	AT5G15700.2	DNA/RNA polymerases superfamily protein	Medtr7g017440.1	leguminosin group485 secreted peptide
Ca27907	Ca3	53657440	53661427	-0.822397	6.24648	-6.86518	4.91468e-07	6.5985e-06	6.09065	PREDICTED: peptidyl-prolyl cis-trans isomerase FKBP19 - chloroplastic n_1 Tax_Cicer arietinum RepID_UPI00032A9489	AT5G13410.1	FKBP-like peptidyl-prolyl cis-trans	Medtr7g006570.1	FKBP-type peptidyl-prolyl cis-trans isomerase
Ca27898	Ca3	53748956	53751168	0.775968	1.34248	5.24308	2.4447e-05	0.000138693	2.61988	PREDICTED: BAG family molecular chaperone regulator 4-like isoform X1 n_3 Tax_Cicer arietinum RepID_UPI00032AC3E0			#N/A	#N/A
Ca27894	Ca3	53763413	53765789	1.78518	2.64197	7.47166	1.23446e-07	2.50081e-06	7.6721	PREDICTED: uncharacterized protein At2g39795 - mitochondrial n_1 Tax_Cicer arietinum RepID_UPI00032AC5EB	AT5G02050.1	Mitochondrial glycoprotein family protein	Medtr7g063520.1	glycoprotein family protein
Ca27897	Ca3	53776271	53788554	0.813255	5.94605	5.25644	2.36489e-05	0.000134816	2.19686	Delta-1-pyrroline-5-carboxylate synthetase 2 n_4 Tax_Papilionoideae RepID_H0UST0_MEDTR	AT4G23160.1	cysteine-rich RLK (RECEPTOR-like	Medtr6g472230.1	disease resistance protein (TIR-NBS-LRR class)%2C putative
Ca27939	Ca3	54237082	54241457	0.509387	5.32711	5.88006	5.1046e-06	4.00179e-05	3.73084	ABC transporter family F protein PpABCF protein n_3 Tax_Papilionoideae RepID_G7LB54_MEDTR	AT3G54540.1	general control non-repressible	Medtr8g075040.1	ABC transporter family F protein PpABCF protein
Ca27933	Ca3	54454502	54456331	0.91169	6.14616	6.74192	6.54558e-07	8.02201e-06	5.80067	60S ribosomal protein L30 n_22 Tax_Eukaryota RepID_RL30_LUPLU			Medtr7g021030.2	ribosomal protein L7Ae/L30e/S12e/Gadd45 family protein
Ca27935	Ca3	54458444	54464430	2.41555	1.77065	6.4671	1.24835e-06	1.32014e-05	5.49394	Carboxypeptidase n_2 Tax_Papilionoideae RepID_G7KSX5_MEDTR	AT1G28110.2	serine carboxypeptidase-like	Medtr7g021130.1	serine carboxypeptidase-like protein
Ca27991	Ca3	54485325	54491352	-0.766664	4.43716	-7.51355	1.12409e-07	2.33919e-06	7.58727	PREDICTED: RNA polymerase II C-terminal domain phosphatase-like 3 n_1 Tax_Cicer arietinum RepID_UPI00032A7781	AT2G33540.1	C-terminal domain phosphatase-like	Medtr7g021190.1	carboxy-terminal domain phosphatase-like protein%2C putative
Ca27958	Ca3	54745744	54746166	0.889564	1.65136	5.02741	4.18339e-05	0.000213854	2.05236	No Hits			#N/A	#N/A
Ca27955	Ca3	54747526	54759226	0.873468	6.06029	5.94948	4.31314e-06	3.53155e-05	3.90308	Uncharacterized protein n_13 Tax_Papilionoideae RepID_I1KWS2_SOYBN	AT2G31660.1	ARM repeat superfamily protein	Medtr7g021500.2	importin-like protein
Ca27966	Ca3	54792014	54800190	-1.16586	2.97923	-10.8467	1.35818e-10	2.92584e-08	14.3975	Eukaryotic aspartyl protease family protein n_2 Tax_Papilionoideae RepID_G7KTS2_MEDTR	AT1G05840.1	Eukaryotic aspartyl protease family	Medtr7g021510.1	eukaryotic aspartyl protease family protein
Ca28025	Ca3	54883821	54887362	-0.367004	5.46227	-4.84728	6.56413e-05	0.000310063	1.17519	Aldo/keto reductase n_3 Tax_Papilionoideae RepID_A2Q5B6_MEDTR	AT1G60730.1	NAD(P)-linked oxidoreductase superfamily	Medtr7g021670.1	aldo/keto reductase family oxidoreductase
Ca27981	Ca3	55055794	55061632	0.615554	6.15073	6.17697	2.49206e-06	2.26477e-05	4.45523	Eukaryotic translation initiation factor 3 subunit H n_7 Tax_Papilionoideae RepID_A2Q5B8_MEDTR	AT1G10840.1	translation initiation factor	Medtr7g021870.1	eukaryotic translation initiation factor 3h
Ca28033	Ca3	55714235	55719700	-0.605897	5.53038	-5.73756	7.2243e-06	5.21698e-05	3.38285	Uncharacterized protein n_19 Tax_fabids RepID_I1N523_SOYBN	AT2G39450.1	Cation efflux family	Medtr7g022890.2	cation diffusion facilitator family transporter
Ca28032	Ca3	55759002	55770708	-0.582111	4.7738	-5.343	1.90796e-05	0.000113109	2.41296	PREDICTED: beta-hexosaminidase 1-like n_1 Tax_Cicer arietinum RepID_UPI00032AA997	AT4G23160.1	cysteine-rich RLK (RECEPTOR-like	Medtr3g093120.1	SPFH domain/band 7 family protein
Ca28061	Ca3	56197181	56200660	-0.696012	7.64552	-5.64519	9.05771e-06	6.19578e-05	3.153	PREDICTED: psbP-like protein 1 - chloroplastic isoform X1 n_2 Tax_Cicer arietinum RepID_UPI00032AD2B8	AT3G55330.1	PsbP-like protein 1	Medtr7g023290.1	oxygen-evolving complex/thylakoid lumenal 25.6 kDa protein
Ca28153	Ca3	57666538	57674067	-0.52837	4.09766	-6.11589	2.88591e-06	2.55212e-05	4.33842	Transcription initiation factor TFIID subunit-like protein n_2 Tax_Papilionoideae RepID_G7KXV7_MEDTR	AT1G04950.3	TATA BOX ASSOCIATED	Medtr7g024860.1	transcription initiation factor TFIID subunit-like protein
Ca28229	Ca3	58636474	58641122	-2.00535	2.30299	-7.90061	4.78383e-08	1.29045e-06	8.64046	PREDICTED: auxin response factor 9-like n_1 Tax_Cicer arietinum RepID_UPI000640CA95	AT4G23980.2	auxin response factor 9	Medtr7g062540.1	auxin response factor 2
Ca28209	Ca3	58763603	58766639	1.48938	0.694715	5.56732	1.09669e-05	7.16218e-05	3.45986	PREDICTED: CRS2-associated factor 2 - mitochondrial n_1 Tax_Cicer arietinum RepID_UPI00032A6114	AT5G54890.1	RNA-binding CRS1 / YhbY (CRM) domain-containing	Medtr0194s0020.1	CRS2-associated factor 1
Ca28334	Ca3	59841628	59845611	-1.05403	5.41481	-7.98283	4.00019e-08	1.16985e-06	8.61665	PREDICTED: acetylornithine aminotransferase - mitochondrial n_1 Tax_Cicer arietinum RepID_UPI00032A9C23	AT1G80600.1	HOPW1-1-interacting 1	Medtr7g451450.1	acetylornithine aminotransferase
Ca28310	Ca3	59962895	59966852	-0.573107	1.91466	-4.87889	6.06455e-05	0.000290506	1.62052	PREDICTED: ultraviolet-B receptor UVR8 n_1 Tax_Cicer arietinum RepID_UPI00032A94DE	AT5G60870.1	Regulator of chromosome condensation	Medtr7g451750.1	chromosome condensation regulator RCC1 repeat protein
Ca28354	Ca3	60040172	60063101	-0.906008	9.91583	-5.26069	2.3401e-05	0.000133751	2.12273	PREDICTED: pectinesterase-like n_1 Tax_Cicer arietinum RepID_UPI00032A6E08	AT1G11580.1	methylesterase PCR	Medtr7g050870.1	pectinesterase/pectinesterase inhibitor
Ca28313	Ca3	60114843	60123771	-1.70001	3.57403	-8.19034	2.55697e-08	8.7764e-07	9.13355	PREDICTED: ABC transporter B family member 15-like n_1 Tax_Cicer arietinum RepID_UPI00032A7012	AT3G28345.1	ABC transporter family protein	Medtr7g051100.1	ABC transporter B family protein
Ca28316	Ca3	60162067	60164163	-1.18116	0.746427	-5.80397	6.14332e-06	4.60824e-05	4.00582	PREDICTED: protein FAR1-RELATED SEQUENCE 12 n_1 Tax_Cicer arietinum RepID_UPI000640CD72	AT4G12850.2	Far-red impaired responsive (FAR1)	Medtr3g006370.1	FAR-RED impaired response-like protein
Ca28328	Ca3	60203513	60209851	-1.13782	3.59128	-7.21402	2.20717e-07	3.72612e-06	6.96393	PREDICTED: uncharacterized protein LOC101490776 n_1 Tax_Cicer arietinum RepID_UPI00032AC2B9	AT5G48440.2	FAD-dependent oxidoreductase family	Medtr7g051240.2	FAD-dependent oxidoreductase
Ca28433	Ca3	60298014	60298806	0.538412	4.12481	6.05902	3.30964e-06	2.84867e-05	4.20058	PREDICTED: LOW QUALITY PROTEIN: eukaryotic translation initiation factor 4G-like n_1 Tax_Cicer arietinum RepID_UPI0006410FC8	AT3G60240.3	eukaryotic translation initiation	Medtr8g008680.2	eukaryotic translation initiation factor 4G-like protein
Ca28431	Ca3	60300858	60304288	0.497365	5.95439	4.96206	4.92529e-05	0.000244427	1.46473	PREDICTED: LOW QUALITY PROTEIN: eukaryotic translation initiation factor 4G-like n_1 Tax_Cicer arietinum RepID_UPI0006410FC8	AT3G60240.4	eukaryotic translation initiation	Medtr7g451340.2	eukaryotic translation initiation factor 4G-like protein
Ca28429	Ca3	60336149	60344746	0.50028	6.77646	5.06225	3.83496e-05	0.000198833	1.71618	PREDICTED: eukaryotic translation initiation factor 4G-like n_1 Tax_Cicer arietinum RepID_UPI00032A79E5	AT3G60240.2	eukaryotic translation initiation	Medtr7g451340.2	eukaryotic translation initiation factor 4G-like protein
Ca28650	Ca3	60695102	60697962	1.96994	4.63352	10.8359	1.38483e-10	2.93996e-08	14.3361	PREDICTED: probable sodium/metabolite cotransporter BASS3 - chloroplastic n_1 Tax_Cicer arietinum RepID_UPI00032A9094	AT3G25410.1	Sodium Bile acid symporter family	Medtr7g053090.1	Na+-bile acid cotransporter
Ca28646	Ca3	60770463	60773315	0.834792	5.16197	6.65289	8.06016e-07	9.34586e-06	5.58977	40S ribosomal protein S6 n_1 Tax_Medicago truncatula RepID_I3T1L8_MEDTR	AT4G31700.2	ribosomal protein S6	Medtr2g014030.1	40S ribosomal protein S6-2
Ca28349	Ca3	60859037	60862511	-0.809139	4.18875	-5.92743	4.55002e-06	3.65699e-05	3.87417	PREDICTED: uncharacterized protein LOC101502310 isoform X2 n_1 Tax_Cicer arietinum RepID_UPI00032AA1E8			#N/A	#N/A
Ca28376	Ca3	61124285	61126734	1.17046	6.36984	8.56425	1.15827e-08	5.05549e-07	9.87033	40S ribosomal protein S8 n_3 Tax_Poaceae RepID_C5YDP0_SORBI	AT5G59240.1	Ribosomal protein S8e family protein	Medtr7g053450.1	40S ribosomal S8-like protein
Ca28373	Ca3	61171734	61174058	1.62312	0.741232	5.6208	9.61646e-06	6.51678e-05	3.58233	Glucan endo-1 -3-beta-glucosidase-like protein n_3 Tax_Papilionoideae RepID_A0A072TYH8_MEDTR	AT3G07320.1	O-Glycosyl hydrolases family 17 protein	Medtr7g053500.1	glucan endo-1%2C3-beta-glucosidase-like protein
Ca28422	Ca3	61548700	61564459	-1.18343	5.56776	-6.05908	3.30912e-06	2.84867e-05	4.16741	Laccase n_3 Tax_Papilionoideae RepID_A0A072U047_MEDTR	AT5G60020.1	laccase 17	Medtr7g458880.1	laccase/diphenol oxidase family protein
Ca28410	Ca3	61720261	61724992	0.935558	3.85617	6.6047	9.02505e-07	1.0189e-05	5.53265	PREDICTED: glycine-rich cell wall structural protein 1.0 isoform X1 n_2 Tax_Cicer arietinum RepID_UPI00032A9FDE			Medtr7g059030.1	DNA-binding protein alba protein
Ca28411	Ca3	61729865	61731097	-0.960085	4.52179	-8.7093	8.56161e-09	4.17629e-07	10.1812	PREDICTED: F-box/kelch-repeat protein At3g24760 n_1 Tax_Cicer arietinum RepID_UPI00032AB850	AT3G24760.1	Galactose oxidase/kelch repeat superfamily	Medtr0197s0070.2	F-box/kelch-repeat plant protein
Ca28418	Ca3	61790499	61791502	-0.727935	5.31202	-4.8852	5.96956e-05	0.000287302	1.26939	Plant/K7P8-3 protein n_2 Tax_Papilionoideae RepID_G7L2C2_MEDTR	AT3G24740.2	Protein of unknown function (DUF1644)	Medtr7g059110.16	plant/K7P8-3 protein
Ca28437	Ca3	61894377	61896014	-0.625229	3.33484	-5.47351	1.38181e-05	8.67601e-05	2.84309	PREDICTED: pentatricopeptide repeat-containing protein At5g16420 - mitochondrial n_1 Tax_Cicer arietinum RepID_UPI00032A914F	AT5G16420.1	Pentatricopeptide repeat (PPR-like)	Medtr7g060720.1	PPR containing plant-like protein%2C putative
Ca28447	Ca3	62374244	62375072	-1.68474	2.03044	-7.70271	7.38583e-08	1.73941e-06	8.22716	PREDICTED: uncharacterized protein LOC101514220 n_1 Tax_Cicer arietinum RepID_UPI00032A7B44			Medtr7g065130.1	hypothetical protein
Ca28468	Ca3	62764826	62767501	-1.12123	10.2742	-9.86583	8.47923e-10	9.35371e-08	12.4415	Fructose-1 -6-bisphosphatase - chloroplastic n_16 Tax_Papilionoideae RepID_F16P1_PEA	AT3G54050.2	high cyclic electron flow 1	Medtr7g066120.1	fructose-1%2C6-bisphosphatase
Ca28484	Ca3	62866946	62867350	-1.09205	1.93761	-6.00874	3.73686e-06	3.12495e-05	4.3622	No Hits			#N/A	#N/A
Ca28497	Ca3	63164454	63164840	-0.589338	4.59444	-5.39732	1.66796e-05	0.000100955	2.5526	PREDICTED: RNA polymerase sigma factor sigA-like n_1 Tax_Cicer arietinum RepID_UPI000640FA05			Medtr0172s0030.1	RNA polymerase sigma factor
Ca28506	Ca3	63226732	63231852	-1.035	4.78605	-4.82866	6.87767e-05	0.000322384	1.13502	Putative uncharacterized protein n_1 Tax_Vitis vinifera RepID_A5AHK5_VITVI	AT3G01400.1	ARM repeat superfamily protein	Medtr1g018180.1	armadillo/beta-catenin-like repeat protein
Ca28501	Ca3	63383489	63387072	-1.08345	3.89474	-5.80652	6.10517e-06	4.58637e-05	3.60183	PREDICTED: zinc finger protein CONSTANS-LIKE 8 n_1 Tax_Cicer arietinum RepID_UPI00032A9641			Medtr7g032240.1	CCT motif protein
Ca28585	Ca3	64265082	64276874	-1.10173	1.11958	-4.80854	7.23316e-05	0.000336188	1.60455	PREDICTED: DNA mismatch repair protein MSH1 - mitochondrial-like isoform X1 n_4 Tax_Cicer arietinum RepID_UPI0006411AC2	AT3G24320.1	MUTL protein	Medtr1g045670.1	DNA mismatch repair protein
Ca28573	Ca3	64880532	64893633	-1.56135	6.02888	-10.1415	5.0095e-10	6.6052e-08	13.0348	PREDICTED: yrdC domain-containing protein - mitochondrial n_1 Tax_Cicer arietinum RepID_UPI00032A6117	AT3G01920.1	DHBP synthase RibB-like alpha/beta	Medtr6g045307.1	IPP transferase
Ca28608	Ca3	65003397	65031154	0.595396	2.90894	5.93768	4.43827e-06	3.59742e-05	4.04091	PREDICTED: DNA replication ATP-dependent helicase/nuclease DNA2 n_1 Tax_Cicer arietinum RepID_UPI00032A8BC9	AT4G23160.1	cysteine-rich RLK (RECEPTOR-like	Medtr7g034575.1	DNA replication ATP-dependent helicase Dna2
Ca28590	Ca3	65577724	65583622	-0.811109	4.96141	-6.29995	1.8569e-06	1.79983e-05	4.74882	PREDICTED: uncharacterized protein LOC101491530 n_1 Tax_Cicer arietinum RepID_UPI00032A7871	AT3G01810.2	FUNCTIONS IN: molecular_function unknown;	Medtr1g075790.1	hypothetical protein
Ca10527	Ca4	107699	118396	-0.902978	5.385	-5.40315	1.64406e-05	9.9887e-05	2.55772	PREDICTED: 125 kDa kinesin-related protein-like n_1 Tax_Cicer arietinum RepID_UPI00064177DC	AT4G20740.1	Pentatricopeptide repeat (PPR-like)	Medtr3g023180.1	PPR containing plant-like protein
Ca10531	Ca4	233371	239594	-0.81749	2.80328	-6.50171	1.1503e-06	1.24426e-05	5.39979	PREDICTED: 125 kDa kinesin-related protein n_1 Tax_Cicer arietinum RepID_UPI00032A9F81	AT2G37420.1	ATP binding microtubule motor family	Medtr1g067630.1	125 kDa kinesin-like protein
Ca10535	Ca4	245416	249114	-3.12409	3.20356	-6.61484	8.81264e-07	1.00066e-05	5.65015	PREDICTED: WAT1-related protein At2g37460-like n_1 Tax_Cicer arietinum RepID_UPI0006410B26	AT2G37460.1	nodulin MtN21 /EamA-like transporter	Medtr1g068630.1	nodulin MtN21/EamA-like transporter family protein
Ca10547	Ca4	340724	345340	0.462413	3.10843	5.19474	2.75683e-05	0.000152498	2.19006	Uncharacterized protein n_1 Tax_Medicago truncatula RepID_G7IBM1_MEDTR			Medtr1g068580.1	hypothetical protein
Ca10539	Ca4	366855	368999	-0.595721	5.54747	-5.31639	2.03804e-05	0.000119295	2.34309	PREDICTED: pentatricopeptide repeat-containing protein At3g53700 - chloroplastic n_1 Tax_Cicer arietinum RepID_UPI00032A7ABD	AT3G53700.1	Pentatricopeptide repeat (PPR)	Medtr1g068960.1	PPR containing plant-like protein
Ca10555	Ca4	463823	465319	0.718631	6.30655	5.73452	7.27831e-06	5.24208e-05	3.37905	HSP20-like chaperone superfamily protein n_3 Tax_Papilionoideae RepID_A0A072VWG6_MEDTR	AT2G37570.1	HSP20-like chaperones superfamily	Medtr1g069065.1	HSP20-like chaperone superfamily protein
Ca10558	Ca4	465734	466214	0.665386	2.90225	4.76965	7.97395e-05	0.000364391	1.17141	No Hits			#N/A	#N/A
Ca10575	Ca4	584750	588299	-1.55475	3.95576	-7.71757	7.14759e-08	1.6923e-06	8.07288	PREDICTED: uncharacterized protein LOC105851045 n_1 Tax_Cicer arietinum RepID_UPI00032AD1A6	AT4G28760.2	Protein of unknown function (DUF3741)	Medtr1g069190.1	DUF3741 family protein
Ca10571	Ca4	597161	598804	-0.510217	10.7366	-5.0663	3.79634e-05	0.000197256	1.6017	PREDICTED: photosystem I reaction center subunit IV A - chloroplastic-like n_1 Tax_Cicer arietinum RepID_UPI00032A8D4F			#N/A	#N/A
Ca10585	Ca4	724505	727359	-0.63786	4.5773	-6.11578	2.88668e-06	2.55212e-05	4.3137	S-(hydroxymethyl)glutathione dehydrogenase n_2 Tax_Pinidae RepID_A9NRF6_PICSI	AT5G43940.1	GroES-like	Medtr1g069430.1	Zn-dependent alcohol dehydrogenase family%2C class III protein
Ca10582	Ca4	755784	762655	3.83967	4.67397	7.18509	2.35728e-07	3.86815e-06	6.8644	PREDICTED: ABC transporter C family member 5 n_1 Tax_Cicer arietinum RepID_UPI00032AA68E	AT1G04120.2	multidrug resistance-associated	Medtr1g069450.1	multidrug resistance protein ABC transporter family protein
Ca10587	Ca4	774986	776367	-0.76805	8.33454	-5.65566	8.82827e-06	6.06597e-05	3.16469	Photosystem II reaction center Psb28 protein n_3 Tax_Papilionoideae RepID_A0A072VWK2_MEDTR	AT4G28660.1	photosystem II reaction center	Medtr1g069465.1	photosystem II reaction center Psb28 protein
Ca10579	Ca4	782612	786102	1.23373	1.71966	4.76294	8.10914e-05	0.000369135	1.39306	PREDICTED: leucine-rich repeat receptor-like protein kinase PXL2 n_1 Tax_Cicer arietinum RepID_UPI00032AD050	AT4G28650.1	Leucine-rich repeat transmembrane protein	Medtr1g069470.1	LRR receptor-like kinase family protein
Ca10595	Ca4	823570	824870	1.71323	5.7051	8.0176	3.70969e-08	1.12356e-06	8.69547	Uncharacterized protein n_20 Tax_Mesangiospermae RepID_A0A059B283_EUCGR	AT3G04400.1	Ribosomal protein L14p/L23e	Medtr1g069585.1	60S ribosomal L23-like protein
Ca10615	Ca4	918862	929976	-0.861952	2.60312	-5.57435	1.07789e-05	7.05446e-05	3.20103	PREDICTED: TBC1 domain family member 15-like n_1 Tax_Cicer arietinum RepID_UPI0006416B96	AT4G28560.1	ROP-interactive CRIB motif-containing	Medtr1g069695.1	ROP-interactive CRIB motif protein%2C putative
Ca10617	Ca4	937208	941491	-0.658463	3.92302	-5.76741	6.71639e-06	4.94231e-05	3.50283	Casein kinase I-like protein n_3 Tax_Papilionoideae RepID_A0A072VLK3_MEDTR	AT4G28540.1	casein kinase I-like 6	Medtr1g069720.1	casein kinase I-like protein
Ca10614	Ca4	968147	971719	1.18284	6.62471	5.85035	5.48707e-06	4.2162e-05	3.66199	ABC transporter family I protein - SmABCI protein n_3 Tax_Papilionoideae RepID_A0A072VM53_MEDTR	AT1G03905.1	P-loop containing nucleoside triphosphate	Medtr1g069750.1	ABC transporter family I protein%2C SmABCI protein
Ca10619	Ca4	990123	997782	0.625675	5.31981	4.96965	4.83273e-05	0.000240761	1.48126	PREDICTED: dolichyl-diphosphooligosaccharide--protein glycosyltransferase subunit 2-like isoform X1 n_2 Tax_Cicer arietinum RepID_UPI00032AA77A	AT4G21150.3	ribophorin II (RPN2) family protein	Medtr1g069780.1	oligosaccharyltransferase subunit ribophorin II
Ca10636	Ca4	1096879	1101917	0.527089	4.45409	5.92894	4.53341e-06	3.6494e-05	3.86947	PREDICTED: uncharacterized protein LOC101499775 n_1 Tax_Cicer arietinum RepID_UPI00032A8C7A	AT1G06200.1	Peptidase S24/S26A/S26B/S26C family	Medtr1g069870.1	peptidase S24/S26A/S26B/S26C family protein
Ca10628	Ca4	1105123	1106631	0.922128	5.74419	6.61269	8.85725e-07	1.00498e-05	5.49456	Uncharacterized protein n_13 Tax_Papilionoideae RepID_C6SZS1_SOYBN	AT1G09690.1	Translation protein SH3-like family	Medtr7g107420.1	60S ribosomal L21-like protein
Ca10629	Ca4	1109573	1125507	-1.29807	6.61334	-4.81116	7.18596e-05	0.000334681	1.08915	No Hits	AT3G54670.1	Structural maintenance	Medtr1g069910.1	structural maintenance of chromosomes protein
Ca10627	Ca4	1127491	1129647	-1.17984	4.34432	-8.47849	1.38668e-08	5.70144e-07	9.70566	PREDICTED: patellin-4-like n_1 Tax_Cicer arietinum RepID_UPI00032AABA4	AT1G30690.2	Sec14p-like phosphatidylinositol transfer	Medtr1g069915.1	CRAL/TRIO%2C amine-terminal domain protein
Ca10631	Ca4	1184794	1187058	1.50104	1.31505	4.74191	8.5484e-05	0.000385118	1.43684	PREDICTED: uncharacterized protein LOC101503717 n_1 Tax_Cicer arietinum RepID_UPI00032A63E0	AT2G31240.1	Tetratricopeptide repeat (TPR)-like	Medtr1g070145.1	kinesin light chain%2C putative
Ca10647	Ca4	1229831	1231625	1.24044	5.48533	7.911	4.67668e-08	1.26826e-06	8.46065	PREDICTED: 1-aminocyclopropane-1-carboxylate oxidase homolog 1-like n_1 Tax_Cicer arietinum RepID_UPI00032A8524	AT5G59540.2	2-oxoglutarate (2OG) and Fe(II)-dependent	Medtr1g070185.1	desacetoxyvindoline 4-hydroxylase%2C putative
Ca10643	Ca4	1237041	1240946	0.723031	4.17549	5.39217	1.68931e-05	0.000102005	2.5689	Alpha/beta-hydrolase superfamily protein n_2 Tax_Papilionoideae RepID_A0A072VLR1_MEDTR	AT2G42450.1	alpha/beta-Hydrolases superfamily protein	Medtr1g070195.1	alpha/beta-hydrolase superfamily protein
Ca10642	Ca4	1264383	1267164	1.42159	2.44708	6.23166	2.18599e-06	2.04996e-05	4.84014	Ribosomal RNA processing protein n_2 Tax_Papilionoideae RepID_B7FL19_MEDTR	AT1G03360.1	ribosomal RNA processing	Medtr4g121550.1	ribosomal RNA processing protein
Ca10658	Ca4	1366419	1372650	0.448353	4.87058	5.31602	2.03993e-05	0.00011936	2.34581	PREDICTED: flowering locus K homology domain-like n_1 Tax_Cicer arietinum RepID_UPI00032AAAC2	AT3G04610.1	RNA-binding KH domain-containing	Medtr1g070380.1	poly(rC)-binding-like protein
Ca10663	Ca4	1407511	1409122	0.731896	6.52067	6.59192	9.30028e-07	1.04364e-05	5.44774	Uncharacterized protein n_15 Tax_Magnoliophyta RepID_I1MQW1_SOYBN	AT5G09510.1	Ribosomal protein S19 family protein	Medtr8g105110.1	40S ribosomal protein S15-4
Ca10676	Ca4	1562662	1567675	-0.969882	4.38751	-5.00215	4.45576e-05	0.00022492	1.58198	PREDICTED: beta-carotene isomerase D27 - chloroplastic-like n_1 Tax_Cicer arietinum RepID_UPI00032AC98E	AT3G12050.1	Aha1 domain-containing protein	Medtr1g471050.1	beta-carotene isomerase D27
Ca10693	Ca4	1760668	1761952	-0.448281	2.67706	-4.78823	7.611e-05	0.000350633	1.25077	PREDICTED: uncharacterized protein LOC101496515 n_1 Tax_Cicer arietinum RepID_UPI00032A7FD0	AT3G63290.1	2-oxoglutarate (2OG) and Fe(II)-dependent	Medtr1g071470.1	2OG-Fe(II) oxygenase domain protein%2C putative
Ca10691	Ca4	1782176	1787411	-1.33779	7.49046	-7.2534	2.01846e-07	3.47662e-06	6.98129	PREDICTED: sulfate transporter 3.1 n_1 Tax_Cicer arietinum RepID_UPI00032AC110	AT3G51895.1	sulfate transporter	Medtr1g071530.1	sulfate/bicarbonate/oxalate exchanger and transporter sat-1
Ca10699	Ca4	1804271	1811593	2.42433	4.12273	6.33934	1.69055e-06	1.67579e-05	4.89709	Acetyl-CoA carboxylase - putative n_4 Tax_Papilionoideae RepID_G7IDL5_MEDTR	AT1G03090.1	methylcrotonyl-CoA carboxylase	Medtr1g071610.1	acetyl-CoA carboxylase%2C putative
Ca10708	Ca4	1812651	1814985	-0.788252	2.44643	-5.16131	2.99597e-05	0.000163363	2.2144	PREDICTED: uncharacterized protein LOC101498832 n_1 Tax_Cicer arietinum RepID_UPI00032A8659	AT4G04614.1	unknown protein; Has 35333 Blast hits	Medtr1g071630.1	hypothetical protein
Ca10700	Ca4	1840408	1843359	-2.01454	1.11389	-6.3865	1.51118e-06	1.53375e-05	5.33812	Type I inositol-1 -4 -5-trisphosphate 5-phosphatase n_2 Tax_Papilionoideae RepID_G7IDM2_MEDTR	AT3G63240.1	DNAse I-like superfamily protein	Medtr1g071680.1	type I inositol-1%2C4%2C5-trisphosphate 5-phosphatase
Ca10704	Ca4	1881850	1882440	-1.04901	3.83273	-7.09663	2.88454e-07	4.43408e-06	6.67471	PREDICTED: uncharacterized protein LOC101501474 n_1 Tax_Cicer arietinum RepID_UPI00032A5F57	AT4G02715.1	unknown protein; Has 30201 Blast hits	Medtr1g071810.1	hypothetical protein
Ca10703	Ca4	1882805	1885344	-0.982657	4.85808	-7.97126	4.10194e-08	1.18292e-06	8.59455	PREDICTED: uncharacterized protein LOC101501474 n_1 Tax_Cicer arietinum RepID_UPI00032A5F57	AT4G02715.1	unknown protein; Has 30201 Blast hits	Medtr1g071810.1	hypothetical protein
Ca10705	Ca4	1885709	1886742	-1.12941	4.08235	-7.6729	7.88865e-08	1.81712e-06	7.96356	No Hits			#N/A	#N/A
Ca10710	Ca4	1895443	1895895	-1.285	2.09719	-5.24669	2.42287e-05	0.000137659	2.51042	PREDICTED: uncharacterized protein LOC101506081 n_1 Tax_Cicer arietinum RepID_UPI00032A9414	AT3G22530.1	unknown protein; FUNCTIONS IN: molecular_function	Medtr1g071920.1	heat shock 22 kDa protein%2C putative
Ca10728	Ca4	2022649	2025026	0.361997	10.4876	5.78172	6.48576e-06	4.81424e-05	3.38639	Stem-loop-binding protein of 41 kDa protein A n_2 Tax_Papilionoideae RepID_G7IED1_MEDTR	AT3G63140.1	chloroplast stem-loop binding	Medtr1g072260.1	stem-loop-binding protein of 41 kDa protein A
Ca10724	Ca4	2025895	2032357	-0.850935	6.49151	-8.02603	3.64261e-08	1.11205e-06	8.71588	PREDICTED: uncharacterized protein LOC101505859 isoform X1 n_1 Tax_Cicer arietinum RepID_UPI00032A83C2	AT1G03160.2	FZO-like	Medtr1g072270.1	FZO-like protein
Ca10731	Ca4	2036643	2049631	-0.799016	2.13852	-5.6126	9.81187e-06	6.60606e-05	3.37575	PREDICTED: mitochondrial Rho GTPase 2-like n_1 Tax_Cicer arietinum RepID_UPI00032A9409	AT4G23160.1	cysteine-rich RLK (RECEPTOR-like	Medtr1g072280.1	Rho GTPase
Ca10722	Ca4	2052199	2054046	1.16776	0.963833	5.2211	2.58194e-05	0.000145187	2.62092	PREDICTED: pentatricopeptide repeat-containing protein At4g02820 - mitochondrial n_1 Tax_Cicer arietinum RepID_UPI00032AA5A7	AT4G02820.1	Pentatricopeptide repeat (PPR) superfamily	Medtr1g072300.2	PPR containing plant protein
Ca10727	Ca4	2060039	2069413	-1.10899	1.28556	-4.79529	7.4774e-05	0.000345623	1.54514	PREDICTED: basic helix-loop-helix protein A n_1 Tax_Cicer arietinum RepID_UPI000640BE86	AT4G09820.1	basic helix-loop-helix (bHLH)	Medtr1g072320.1	bHLH transcription factor
Ca10739	Ca4	2111941	2114205	-1.48461	3.99307	-10.6758	1.85363e-10	3.58877e-08	14.054	PREDICTED: phenazine biosynthesis-like domain-containing protein 1 n_1 Tax_Cicer arietinum RepID_UPI00032A9736	AT4G02860.1	Phenazine biosynthesis PhzC/PhzF protein	Medtr1g072490.1	phenazine biosynthesis PhzC/PhzF family protein
Ca10735	Ca4	2127210	2128190	-1.85513	3.82886	-7.78934	6.10305e-08	1.5203e-06	8.24464	PREDICTED: adenylate isopentenyltransferase 3 - chloroplastic n_1 Tax_Cicer arietinum RepID_UPI00032AB280	AT3G63110.1	isopentenyltransferase	Medtr1g072540.1	adenylate isopentenyltransferase
Ca10738	Ca4	2179568	2183028	4.58894	1.24336	5.82698	5.80834e-06	4.41763e-05	4.06109	PREDICTED: protein PALE CRESS - chloroplastic n_1 Tax_Cicer arietinum RepID_UPI00032AA324	AT2G48120.2	pale cress protein (PAC)	Medtr1g072640.2	PALE CRESS protein (PAC)
Ca10750	Ca4	2187642	2191020	-0.688063	5.36204	-5.91152	4.72912e-06	3.76728e-05	3.80687	PREDICTED: BTB/POZ and MATH domain-containing protein 2-like isoform X2 n_1 Tax_Cicer arietinum RepID_UPI00032A62D3	AT3G06190.2	BTB-POZ and MATH domain	Medtr1g072650.1	BTB/POZ/MATH-domain protein
Ca10754	Ca4	2241653	2243237	-0.909371	3.40269	-7.17032	2.4379e-07	3.94578e-06	6.88031	Uncharacterized protein n_13 Tax_Papilionoideae RepID_A0A072UC92_MEDTR	AT1G17840.1	white-brown	Medtr6g066240.1	white-brown-complex ABC transporter family protein%2C putative
Ca10752	Ca4	2257509	2268174	-0.783237	5.79673	-5.61134	9.84241e-06	6.61713e-05	3.07377	Uncharacterized protein n_13 Tax_Papilionoideae RepID_A0A072UC92_MEDTR	AT1G17840.1	white-brown	Medtr6g066240.1	white-brown-complex ABC transporter family protein%2C putative
Ca10760	Ca4	2390133	2399560	0.874768	4.861	6.38947	1.50058e-06	1.52602e-05	4.97042	PREDICTED: RRP12-like protein n_1 Tax_Cicer arietinum RepID_UPI00032A5CF6	AT2G34357.1	ARM repeat superfamily protein	Medtr1g072890.2	RRP12-like protein
Ca10764	Ca4	2421402	2424324	-1.02859	6.12602	-5.65234	8.90028e-06	6.10722e-05	3.17698	PREDICTED: haloacid dehalogenase-like hydrolase domain-containing protein At2g33255 n_1 Tax_Cicer arietinum RepID_UPI00032AA72B	AT2G33255.1	Haloacid dehalogenase-like hydrolase	Medtr1g073140.1	haloacid dehalogenase-like hydrolase
Ca10774	Ca4	2506010	2507461	-1.14244	2.80754	-6.20632	2.32273e-06	2.14789e-05	4.708	PREDICTED: uncharacterized protein LOC101510902 n_1 Tax_Cicer arietinum RepID_UPI00032A5EC7			Medtr1g073660.1	hypothetical protein
Ca10776	Ca4	2514238	2517791	0.883929	5.87891	7.94835	4.31139e-08	1.20114e-06	8.5432	Uncharacterized protein n_10 Tax_Phaseoleae RepID_A0A0S3SPK5_PHAAN	AT4G14300.1	RNA-binding (RRM/RBD/RNP motifs) family	Medtr1g073690.2	RNA-binding (RRM/RBD/RNP motif) family protein
Ca10791	Ca4	2633778	2637731	-0.848205	2.97211	-5.94035	4.40966e-06	3.57992e-05	4.04197	PREDICTED: LOW QUALITY PROTEIN: CASP-like protein 5B3 n_1 Tax_Cicer arietinum RepID_UPI00032A7F36			Medtr1g073950.1	CASP-like protein
Ca10794	Ca4	2652704	2655984	-0.883769	5.88385	-6.29318	1.88713e-06	1.8245e-05	4.73352	Uncharacterized protein n_9 Tax_Papilionoideae RepID_I1NI24_SOYBN	AT5G43430.2	electron transfer flavoprotein	Medtr1g074170.1	electron transfer flavoprotein subunit beta
Ca10801	Ca4	2753368	2756399	-0.674472	4.27681	-4.77755	7.81751e-05	0.000358527	1.03278	Serine/threonine-protein phosphatase n_6 Tax_Papilionoideae RepID_O65846_MEDSA	AT3G46820.1	type one serine/threonine protein	Medtr1g074880.3	serine/threonine-protein phosphatase PP1
Ca10808	Ca4	2843843	2844336	-2.16207	1.32993	-7.02184	3.42398e-07	5.07951e-06	6.76329	PREDICTED: uncharacterized protein LOC101494774 isoform X1 n_2 Tax_Cicer arietinum RepID_UPI00032A7D59			Medtr1g475250.3	P-loop nucleoside triphosphate hydrolase superfamily protein
Ca10820	Ca4	2920576	2923619	1.10627	4.3679	6.71512	6.96816e-07	8.34664e-06	5.75876	PREDICTED: multiple organellar RNA editing factor 2 - chloroplastic-like n_1 Tax_Cicer arietinum RepID_UPI000640C922	AT2G33430.1	differentiation and greening-like	Medtr1g075460.1	plastid developmental protein DAG
Ca10831	Ca4	3035498	3036606	1.00888	5.93742	5.66849	8.55479e-06	5.92744e-05	3.21533	Uncharacterized protein n_2 Tax_Soja RepID_K7K5S3_SOYBN	AT4G27090.1	Ribosomal protein L14	Medtr1g075720.1	60S ribosomal L14-like protein
Ca10847	Ca4	3116997	3123827	-0.419746	5.38936	-6.72334	6.83566e-07	8.25841e-06	5.75317	AGC kinase n_1 Tax_Medicago truncatula RepID_G7I4W4_MEDTR	AT4G14350.2	AGC (cAMP-dependent, cGMP-dependent	Medtr1g075880.1	AGC kinase
Ca10852	Ca4	3192438	3198681	-0.745517	7.06574	-5.63315	9.32924e-06	6.35593e-05	3.12875	PREDICTED: cryptochrome-1-like n_1 Tax_Cicer arietinum RepID_UPI00032AB630	AT1G04400.1	cryptochrome	Medtr1g076190.2	cryptochrome 2B apoprotein
Ca10877	Ca4	3393192	3402835	1.89761	5.11067	10.2691	3.93826e-10	5.62951e-08	13.2791	Pyruvate kinase n_2 Tax_Papilionoideae RepID_A0A072VLB0_MEDTR	AT3G22960.1	Pyruvate kinase family	Medtr1g076540.1	pyruvate kinase family protein
Ca10874	Ca4	3441342	3442784	-1.62628	0.138808	-6.28891	1.90645e-06	1.83969e-05	5.05634	PREDICTED: uncharacterized protein LOC101492634 n_1 Tax_Cicer arietinum RepID_UPI00032A9149	AT5G51670.1	Protein of unknown function (DUF668)	Medtr0318s0020.1	DUF3475 domain protein
Ca10883	Ca4	3488258	3501212	-0.89246	7.60115	-5.23315	2.50575e-05	0.000141579	2.13391	PREDICTED: uncharacterized protein At2g17340-like n_1 Tax_Cicer arietinum RepID_UPI00032ACF2F	AT2G17340.1	Uncharacterised conserved protein (UCP030210)	Medtr1g076730.1	pantothenate kinase
Ca10902	Ca4	3720745	3722511	0.982138	0.491879	5.00369	4.43861e-05	0.000224467	2.14733	No Hits			#N/A	#N/A
Ca10940	Ca4	4091418	4099125	0.635589	5.50929	6.77282	6.09072e-07	7.5985e-06	5.87074	PREDICTED: nuclear pore complex protein NUP98A isoform X1 n_6 Tax_Cicer arietinum RepID_UPI00032A8F05	AT1G10390.2	Nucleoporin autopeptidase	Medtr1g078040.2	nucleoporin autopeptidase
Ca10937	Ca4	4137812	4140180	-2.99585	0.70084	-8.79193	7.21637e-09	3.73862e-07	10.2535	PREDICTED: heavy metal-associated isoprenylated plant protein 26-like n_1 Tax_Cicer arietinum RepID_UPI00032A9C52	AT2G18196.1	Heavy metal transport/detoxification	Medtr1g078090.1	heavy metal transport/detoxification superfamily protein
Ca10948	Ca4	4181159	4187667	-0.912106	2.52235	-7.12084	2.72925e-07	4.24829e-06	6.87173	PREDICTED: aspartic proteinase-like protein 2 n_1 Tax_Cicer arietinum RepID_UPI00032AA2EF	AT1G05840.1	Eukaryotic aspartyl protease family	Medtr1g078240.3	eukaryotic aspartyl protease family protein
Ca10951	Ca4	4268133	4285056	-0.660225	5.53609	-7.4366	1.33534e-07	2.64314e-06	7.40049	PREDICTED: putative F-box protein PP2-B12 n_1 Tax_Cicer arietinum RepID_UPI00032ACF4B	AT2G02360.1	phloem protein 2-B10	Medtr1g079140.1	F-box protein
Ca10954	Ca4	4287440	4290839	-1.25735	1.48964	-5.49523	1.30974e-05	8.28813e-05	3.20074	PREDICTED: serine/threonine-protein kinase At3g07070-like n_1 Tax_Cicer arietinum RepID_UPI00032A5297	AT3G07070.1	Protein kinase superfamily protein	Medtr1g079430.2	Serine/Threonine-kinase PBS1-like protein
Ca10967	Ca4	4444527	4449710	0.614702	5.4236	5.66391	8.65135e-06	5.97662e-05	3.20189	ER membrane protein complex subunit-like protein n_13 Tax_Papilionoideae RepID_G7I684_MEDTR	AT4G12590.1	Protein of unknown function DUF106,	Medtr1g079890.1	ER membrane protein complex subunit-like protein
Ca10970	Ca4	4465754	4473218	-0.363565	5.92041	-4.83814	6.71623e-05	0.000315687	1.15566	Serine/threonine-protein phosphatase n_3 Tax_eudicotyledons RepID_G7I691_MEDTR	AT2G39840.1	type one serine/threonine protein	Medtr1g079950.5	serine/threonine-protein phosphatase PP1
Ca10983	Ca4	4515496	4520130	-0.4803	4.63188	-6.01763	3.65744e-06	3.07029e-05	4.07334	RNA recognition motif n_3 Tax_Papilionoideae RepID_G7I6S0_MEDTR	AT3G04500.1	RNA-binding (RRM/RBD/RNP motifs) family	Medtr1g080150.3	RNA recognition motif%2C a.k.a. RRM%2C RBD protein
Ca10976	Ca4	4552301	4555801	2.04731	0.968047	5.61885	9.66253e-06	6.54221e-05	3.56787	PREDICTED: DNA-directed RNA polymerase III subunit RPC4-like n_1 Tax_Cicer arietinum RepID_UPI00032A6B07			Medtr1g080300.1	RNA polymerase III RPC4
Ca11003	Ca4	4759053	4760535	-3.55343	2.3677	-8.62097	1.02882e-08	4.69154e-07	10.1532	PREDICTED: uncharacterized protein At2g34160-like n_1 Tax_Cicer arietinum RepID_UPI00032A9AC5			#N/A	#N/A
Ca10995	Ca4	4777101	4780682	-1.65596	5.07118	-5.13811	3.17418e-05	0.000170827	1.90565	PREDICTED: protein WVD2-like 1 n_1 Tax_Cicer arietinum RepID_UPI00032AC7E6	AT1G54460.1	TPX2 (targeting protein for Xklp2)	Medtr1g080690.1	TPX2 (targeting protein for Xklp2) family protein
Ca11013	Ca4	4845116	4846363	0.453476	5.75191	5.59761	1.018e-05	6.78151e-05	3.03975	PREDICTED: sec-independent protein translocase protein TATA - chloroplastic-like n_1 Tax_Cicer arietinum RepID_UPI00032A947A	AT5G28750.1	Bacterial sec-independent translocation	Medtr1g080910.1	twin arginine translocase
Ca11017	Ca4	4847420	4851374	-0.516838	5.44761	-5.09891	3.49982e-05	0.000185096	1.80223	PREDICTED: light-inducible protein CPRF2-like isoform X1 n_1 Tax_Cicer arietinum RepID_UPI00032A8F09			Medtr1g080920.1	transcription factor bZIP88
Ca11011	Ca4	4860142	4863753	-0.603393	9.82111	-6.02306	3.60975e-06	3.04026e-05	4.00476	GDP-D-mannose-3 -5-epimerase n_3 Tax_Medicago truncatula RepID_A0A072VNM9_MEDTR	AT5G28840.2	GDP-D-mannose 3',5'-epimerase	Medtr1g080950.2	GDP-D-mannose-3%2C5-epimerase
Ca11030	Ca4	4908450	4911594	1.35329	2.98722	6.20348	2.33858e-06	2.15633e-05	4.67818	PREDICTED: trihelix transcription factor GTL2-like n_1 Tax_Cicer arietinum RepID_UPI00032A76DD	AT5G28300.1	Duplicated homeodomain-like superfamily	Medtr1g081180.1	trihelix transcription factor
Ca11031	Ca4	4945521	4951314	-0.406706	7.93279	-5.8773	5.13889e-06	4.02454e-05	3.71767	Zeta-carotene desaturase n_10 Tax_Papilionoideae RepID_I1LBJ5_SOYBN	AT3G04870.2	zeta-carotene desaturase	Medtr1g081290.3	zeta-carotene desaturase
Ca11025	Ca4	4973360	4975799	0.864782	4.51241	7.13759	2.62682e-07	4.15483e-06	6.73405	PREDICTED: 40S ribosomal protein S24-1-like n_1 Tax_Cicer arietinum RepID_UPI0006414FDF	AT5G28060.1	Ribosomal protein S24e family protein	Medtr1g081410.1	40S ribosomal protein S24-2
Ca11040	Ca4	5034002	5059905	-0.538432	4.88976	-4.86779	6.23558e-05	0.000297484	1.22906	Armadillo/beta-catenin-like repeat protein n_5 Tax_Papilionoideae RepID_A0A072VNP6_MEDTR	AT5G27970.2	ARM repeat superfamily protein	Medtr1g081710.1	armadillo/beta-catenin-like repeat protein
Ca11046	Ca4	5157571	5163976	0.505828	6.39801	6.23455	2.1709e-06	2.03956e-05	4.59497	Sodium/hydrogen exchanger n_11 Tax_Phaseoleae RepID_G3MDF0_VIGRA	AT3G05030.2	sodium hydrogen exchanger	Medtr1g081900.2	Na+/H+ exchanger 1
Ca11060	Ca4	5188605	5193161	-1.8012	3.19727	-6.62619	8.58107e-07	9.81656e-06	5.64727	PREDICTED: vesicle-associated protein 2-2 isoform X1 n_2 Tax_Cicer arietinum RepID_UPI00032A7706			Medtr1g081950.2	VAMP-associated protein
Ca11059	Ca4	5207100	5209026	-0.765806	3.39831	-5.64862	8.98196e-06	6.15238e-05	3.26582	Uncharacterized protein n_5 Tax_Phaseoleae RepID_A0A0S3SQD2_PHAAN	AT5G27320.1	alpha/beta-Hydrolases	Medtr1g082210.1	gibberellin receptor GID1c-like protein
Ca11064	Ca4	5211691	5213757	-1.14543	4.99774	-8.79356	7.19224e-09	3.73862e-07	10.3573	PREDICTED: myosin-10 isoform X1 n_1 Tax_Cicer arietinum RepID_UPI00032A5931			Medtr1g082215.1	viral A-type inclusion protein%2C putative
Ca11068	Ca4	5259557	5264082	1.17944	3.62557	7.08656	2.95178e-07	4.52248e-06	6.68514	PREDICTED: uncharacterized protein LOC101510461 isoform X1 n_2 Tax_Cicer arietinum RepID_UPI00032A9E03			Medtr1g082380.2	protein translocase family protein
Ca11065	Ca4	5268856	5271339	-0.498451	9.70103	-5.9219	4.61148e-06	3.6928e-05	3.76307	Thylakoid lumen 18.3 kDa protein n_3 Tax_Papilionoideae RepID_G7I7H7_MEDTR	AT1G54780.1	thylakoid lumen 18.3 kDa protein	Medtr1g082420.2	thylakoid lumen 18.3 kDa protein
Ca11077	Ca4	5360008	5362725	3.1199	1.4382	5.97764	4.02882e-06	3.32367e-05	4.38947	PREDICTED: serine/threonine-protein kinase CDL1 n_1 Tax_Cicer arietinum RepID_UPI00032A93CC	AT1G54820.1	Protein kinase superfamily protein	Medtr1g082580.1	Serine/Threonine kinase family protein
Ca11072	Ca4	5378284	5380836	1.23255	4.25935	5.39982	1.65767e-05	0.000100572	2.5853	PREDICTED: uncharacterized protein DDB_G0283357 n_1 Tax_Cicer arietinum RepID_UPI00032AAF1F			Medtr1g082650.1	heavy-metal-associated domain protein
Ca11080	Ca4	5390251	5392267	0.348081	5.59649	5.06278	3.82983e-05	0.000198634	1.71347	Nuclear transcription factor Y protein n_2 Tax_Papilionoideae RepID_B7FI76_MEDTR	AT1G08970.2	nuclear factor Y, subunit	Medtr1g082660.1	nuclear transcription factor Y protein
Ca11085	Ca4	5428610	5433252	0.775251	4.44619	6.07025	3.22123e-06	2.79142e-05	4.21598	Seryl-tRNA synthetase/serine-tRNA ligase n_10 Tax_Papilionoideae RepID_G7I834_MEDTR	AT5G27470.1	seryl-tRNA synthetase / serine--tRNA	Medtr1g082850.1	seryl-tRNA synthetase/serine-tRNA ligase
Ca11081	Ca4	5471550	5473314	-0.67479	5.06082	-5.81718	5.9486e-06	4.50094e-05	3.57719	Peptidoglycan-binding LysM domain protein n_4 Tax_Papilionoideae RepID_G7I844_MEDTR	AT1G55000.3	peptidoglycan-binding LysM domain-containing	Medtr1g082950.1	peptidoglycan-binding LysM domain protein
Ca11095	Ca4	5555816	5556888	-1.39976	4.62945	-5.88086	5.09463e-06	3.99665e-05	3.74234	PREDICTED: psbP domain-containing protein 7 - chloroplastic n_1 Tax_Cicer arietinum RepID_UPI00032A9F7E	AT3G05410.2	Photosystem II reaction center PsbP	Medtr1g083110.1	photosystem II reaction center PsbP family protein
Ca11115	Ca4	5676978	5681205	1.25385	2.75289	6.1804	2.47165e-06	2.25023e-05	4.65508	PREDICTED: serine/arginine-rich splicing factor SR30-like n_1 Tax_Cicer arietinum RepID_UPI00032AB4F1			#N/A	#N/A
Ca11120	Ca4	5699941	5701446	1.03613	3.20612	5.33154	1.96291e-05	0.000115739	2.52683	Ribosomal L22e family protein n_3 Tax_Papilionoideae RepID_G7I8Q9_MEDTR	AT3G05560.3	Ribosomal L22e protein family	Medtr1g083430.2	ribosomal L22e family protein
Ca11118	Ca4	5718602	5720508	1.08107	5.7799	6.17602	2.49772e-06	2.26722e-05	4.4514	60S ribosomal protein L18-2 n_2 Tax_Soja RepID_A0A0B2QKI0_GLYSO	AT5G27850.1	Ribosomal protein L18e/L15 superfamily	Medtr7g108805.1	60S ribosomal protein L18-3
Ca11142	Ca4	5808077	5811445	1.12188	2.57515	7.9889	3.9478e-08	1.15895e-06	8.80965	PREDICTED: single-stranded DNA-binding protein - mitochondrial n_1 Tax_Cicer arietinum RepID_UPI00032A6C87	AT4G11060.1	mitochondrially targeted single-stranded	Medtr1g083740.2	single-stranded DNA-binding protein
Ca11141	Ca4	5813623	5815780	0.944287	4.49324	4.83984	6.68762e-05	0.00031473	1.18953	PREDICTED: probable protein phosphatase 2C 5 isoform X1 n_2 Tax_Cicer arietinum RepID_UPI00032A5AEB	AT1G09160.1	Protein phosphatase 2C family protein	Medtr1g083750.1	protein phosphatase 2C family protein
Ca11146	Ca4	5907267	5908398	3.12586	0.114276	5.3213	2.01336e-05	0.000118031	2.87462	Uncharacterized protein n_3 Tax_Papilionoideae RepID_G7I9H1_MEDTR			Medtr1g083950.1	universal stress family protein
Ca11153	Ca4	5941617	5951833	1.99841	4.43192	8.93229	5.40897e-09	3.19422e-07	10.6814	Lon protease homolog n_2 Tax_Cicer arietinum RepID_A0A059XV79_CICAR	AT5G26860.1	lon protease 1	Medtr1g084020.1	Lon-related ATP-dependent protease%2C putative
Ca11152	Ca4	5980213	5988095	2.21453	1.57595	5.89322	4.94389e-06	3.90171e-05	4.18079	Cyclin-like protein n_2 Tax_Papilionoideae RepID_A0A072VN87_MEDTR	AT5G26850.4	Uncharacterized protein	Medtr1g084090.1	cyclin-like protein
Ca11168	Ca4	6018319	6023789	-0.786664	7.08808	-7.92163	4.56961e-08	1.24585e-06	8.48506	PREDICTED: solute carrier family 40 member 3 - chloroplastic n_1 Tax_Cicer arietinum RepID_UPI00032A50BA	AT5G26820.1	iron-regulated	Medtr1g084140.2	solute carrier family 40 protein
Ca11161	Ca4	6061704	6066435	0.699903	2.57746	5.71996	7.54196e-06	5.38787e-05	3.57003	PREDICTED: rhodanese-like domain-containing protein 6 isoform X1 n_1 Tax_Cicer arietinum RepID_UPI00032A79A3	AT1G09280.1	CONTAINS InterPro DOMAIN/s: Rhodanese-like	Medtr1g084180.1	phospholipase/carboxylesterase family protein
Ca11164	Ca4	6067824	6076431	0.806287	3.27208	7.03871	3.2939e-07	4.92957e-06	6.60052	Uncharacterized protein n_2 Tax_Papilionoideae RepID_A0A072VM73_MEDTR	AT1G09300.2	Metallopeptidase M24 family protein	Medtr1g084190.1	Xaa-pro aminopeptidase
Ca11162	Ca4	6083893	6084567	-1.09033	6.87157	-8.60748	1.05818e-08	4.76026e-07	9.962	PREDICTED: uncharacterized protein LOC101504472 n_1 Tax_Cicer arietinum RepID_UPI0006412B54	AT1G09310.1	Protein of unknown function, DUF538	Medtr7g111900.1	plant/F25P12-18 protein
Ca11183	Ca4	6137447	6141613	-0.692845	7.90921	-5.9719	4.08514e-06	3.36538e-05	3.94853	Uncharacterized protein n_1 Tax_Oryza glumipatula RepID_A0A0D9Y646_9ORYZ	AT5G26751.1	shaggy-related kinase	Medtr1g084760.2	glycogen synthase kinase
Ca11177	Ca4	6185697	6186882	0.495541	2.11055	5.10897	3.41314e-05	0.000181138	2.15427	PREDICTED: uncharacterized protein LOC101498257 n_1 Tax_Cicer arietinum RepID_UPI00032A6204			Medtr1g484850.1	DNA-binding protein
Ca11185	Ca4	6285068	6288809	-1.38201	3.10953	-7.31922	1.73915e-07	3.15544e-06	7.27218	PREDICTED: transcription factor PIF3 isoform X1 n_2 Tax_Cicer arietinum RepID_UPI00032A5A77			Medtr1g084980.1	phytochrome-interacting factor 3.1
Ca11206	Ca4	6405513	6411511	-0.573673	5.78234	-5.42111	1.57269e-05	9.63713e-05	2.60408	Phytochrome A n_7 Tax_Papilionoideae RepID_PHYA_PEA	AT1G09570.1	phytochrome A	Medtr1g085160.1	phytochrome protein A
Ca11196	Ca4	6453919	6466109	-0.712621	5.42591	-6.11202	2.91295e-06	2.56793e-05	4.29431	Metal ion-binding protein n_4 Tax_Papilionoideae RepID_G7IAF7_MEDTR	AT3G62010.1	unknown protein; LOCATED IN: cellular_component	Medtr7g111030.1	metal ion-binding protein
Ca11210	Ca4	6517758	6520606	0.883537	8.55988	5.26703	2.30356e-05	0.000132075	2.19515	PREDICTED: peptidyl-prolyl cis-trans isomerase - chloroplastic-like n_1 Tax_Cicer arietinum RepID_UPI00032AC405	AT3G62030.1	rotamase CYP 4	Medtr7g110980.1	peptidyl-prolyl cis-trans isomerase
Ca11208	Ca4	6524917	6532330	0.790772	3.67977	5.47635	1.37213e-05	8.61878e-05	2.81582	PREDICTED: aarF domain-containing protein kinase 4 n_1 Tax_Cicer arietinum RepID_UPI00032A6168	AT4G01660.1	ABC transporter	Medtr1g085610.1	ubiquinone biosynthesis protein
Ca11224	Ca4	6587819	6593882	0.797106	6.61461	6.7208	6.87628e-07	8.29398e-06	5.75203	Protoporphyrinogen IX oxidase n_2 Tax_Papilionoideae RepID_A0A072VNG3_MEDTR	AT4G01690.1	Flavin containing	Medtr1g085730.2	protoporphyrinogen IX oxidase
Ca11229	Ca4	6603120	6614794	-0.691153	7.99793	-6.03257	3.52776e-06	2.99196e-05	4.09425	Protein translocase subunit SecA - chloroplastic n_3 Tax_Papilionoideae RepID_SECA_PEA	AT4G01800.1	Albino or Glassy	Medtr1g086050.1	preprotein translocase subunit SecA
Ca11226	Ca4	6654358	6654614	-4.97168	1.56843	-7.69438	7.52288e-08	1.76476e-06	8.20665	No Hits			#N/A	#N/A
Ca11227	Ca4	6655509	6656242	-1.8693	4.13476	-6.71762	6.92744e-07	8.31573e-06	5.77443	PREDICTED: protein RADIALIS-like 3 n_1 Tax_Cicer arietinum RepID_UPI00032A9F08			Medtr1g086180.1	MYB family transcription factor
Ca11236	Ca4	6689569	6697440	0.610007	7.26131	7.65582	8.19264e-08	1.85915e-06	7.8946	PREDICTED: squamosa promoter-binding-like protein 1 n_1 Tax_Cicer arietinum RepID_UPI00032A5A47	AT2G47070.1	squamosa promoter binding protein-like	Medtr1g086250.2	squamosa promoter-binding-like protein
Ca11239	Ca4	6711235	6718391	-1.69549	5.88621	-7.99962	3.8571e-08	1.14775e-06	8.65577	Protein phosphatase 2C-like protein n_1 Tax_Medicago truncatula RepID_G7IBT7_MEDTR	AT3G62260.1	Protein phosphatase 2C family protein	Medtr1g086350.2	protein phosphatase 2C-like protein
Ca11261	Ca4	6909908	6916719	-0.694386	3.14405	-7.3775	1.52499e-07	2.89714e-06	7.3793	PREDICTED: uncharacterized protein LOC101499866 n_1 Tax_Cicer arietinum RepID_UPI00032A96AE	AT3G62370.1	heme binding	Medtr1g086810.1	heme-binding protein
Ca11271	Ca4	6918069	6919987	2.35007	2.91247	7.85502	5.28482e-08	1.37992e-06	8.51399	PREDICTED: pentatricopeptide repeat-containing protein At1g02370 - mitochondrial-like n_1 Tax_Cicer arietinum RepID_UPI00032A5146	AT1G02370.1	Tetratricopeptide repeat (TPR)-like	Medtr1g086820.1	PPR containing plant protein
Ca11259	Ca4	6920206	6922672	-1.86725	4.57309	-11.3741	5.31167e-11	1.72855e-08	15.2921	PREDICTED: beta-carotene isomerase D27 - chloroplastic isoform X1 n_2 Tax_Cicer arietinum RepID_UPI000641073B	AT4G01995.1	unknown protein; BEST Arabidopsis thaliana	Medtr1g086840.1	D27 family protein%2C putative
Ca11285	Ca4	7105683	7108605	0.586663	4.00742	5.13357	3.21027e-05	0.000172285	1.93535	Late embryogenesis abundant protein (LEA) family protein n_2 Tax_Medicago truncatula RepID_G7IDS7_MEDTR	AT3G62580.1	Late embryogenesis abundant protein	Medtr1g087320.1	late embryogenesis abundant protein (LEA) family protein
Ca11286	Ca4	7138881	7145407	3.83886	3.41327	10.0425	6.0448e-10	7.44482e-08	12.9313	MYB transcription factor MYB112 n_1 Tax_Medicago truncatula RepID_D5FFI0_MEDTR	AT5G49330.1	myb domain protein	Medtr1g087540.1	myb transcription factor%2C putative
Ca11283	Ca4	7150235	7155016	0.772355	6.16029	6.92782	4.25183e-07	5.92861e-06	6.23576	Protein disufide isomerase-like protein n_15 Tax_Papilionoideae RepID_I1L7R5_SOYBN	AT2G47470.2		Medtr1g087520.1	protein disulfide isomerase-like protein
Ca11302	Ca4	7196065	7199439	0.625358	5.38464	5.85025	5.48837e-06	4.2162e-05	3.65912	Kynurenine-oxoglutarate transaminase-like protein n_2 Tax_Papilionoideae RepID_G7IEH9_MEDTR	AT1G77670.1	Pyridoxal phosphate (PLP)-dependent	Medtr1g087760.1	kynurenine-oxoglutarate transaminase-like protein
Ca11296	Ca4	7207854	7213348	-1.11505	4.01465	-11.5128	4.17034e-11	1.44967e-08	15.5435	PREDICTED: uncharacterized protein LOC101511423 n_1 Tax_Cicer arietinum RepID_UPI00032AD3FC	AT1G29220.1	transcriptional regulator family protein	Medtr1g087790.2	transcriptional regulator family protein%2C putative
Ca11313	Ca4	7288948	7291001	1.08675	6.44551	7.9381	4.40864e-08	1.21496e-06	8.522	Ribosomal protein L19 n_9 Tax_rosids RepID_I3SA92_MEDTR	AT4G02230.1	Ribosomal protein L19e family protein	Medtr7g108955.2	60S ribosomal protein L19
Ca11316	Ca4	7300146	7301300	6.46278	0.275442	5.12358	3.29112e-05	0.00017578	2.35821	PREDICTED: ethylene-responsive transcription factor ERF113-like n_2 Tax_Cicer arietinum RepID_UPI00032A624C	AT2G47520.1	Integrase-type DNA-binding superfamily	Medtr1g087920.1	ethylene response factor
Ca11319	Ca4	7454862	7464398	-1.04979	2.25936	-6.32484	1.74993e-06	1.71462e-05	5.06181	PREDICTED: poly [ADP-ribose] polymerase 2 n_1 Tax_Cicer arietinum RepID_UPI00032AC3FF	AT4G02390.1	poly(ADP-ribose)	Medtr1g088375.1	poly(ADP-ribose) polymerase domain protein
Ca11320	Ca4	7476487	7482785	-1.03169	1.8925	-4.88375	5.99125e-05	0.000287983	1.64112	Gamma-tubulin complex component 4 homolog n_4 Tax_Papilionoideae RepID_GCP4_MEDTR	AT3G53760.1	GAMMA-TUBULIN COMPLEX PROTEIN	Medtr1g088410.1	tubulin gamma complex-associated protein
Ca11318	Ca4	7484777	7488746	-0.294932	9.07028	-4.88436	5.98208e-05	0.000287723	1.2217	PREDICTED: blue-light photoreceptor PHR2 n_1 Tax_Cicer arietinum RepID_UPI00032AA017	AT2G47590.1	photolyase/blue-light receptor	Medtr1g088420.1	photolyase/blue-light receptor PHR2
Ca11339	Ca4	7550614	7560119	0.974786	1.52847	4.68479	9.86542e-05	0.000433317	1.23726	PREDICTED: zinc finger CCCH domain-containing protein 31 n_1 Tax_Cicer arietinum RepID_UPI00032A68E4	AT2G47680.1	zinc finger (CCCH type) helicase family	Medtr1g088590.1	zinc finger CCCH domain protein
Ca11337	Ca4	7581445	7582470	1.01443	3.34663	6.47781	1.21713e-06	1.29761e-05	5.28591	PREDICTED: uncharacterized protein LOC101493731 n_1 Tax_Cicer arietinum RepID_UPI00032A8A10	AT1G02870.1	FUNCTIONS IN: molecular_function unknown;	Medtr1g088670.1	ribosome biogenesis protein Nop16
Ca11350	Ca4	7590523	7598281	1.68904	8.69509	6.87686	4.78348e-07	6.4632e-06	6.08574	PREDICTED: ABC transporter C family member 4-like n_1 Tax_Cicer arietinum RepID_UPI00032A559C	AT2G47800.1	multidrug	Medtr1g088680.1	multidrug resistance protein ABC transporter family protein
Ca11353	Ca4	7610887	7613124	-0.460307	4.62956	-5.02883	4.16853e-05	0.000213236	1.63645	PREDICTED: LOW QUALITY PROTEIN: sm-like protein LSM4 n_1 Tax_Vigna radiata var. radiata RepID_UPI000711A17E	AT5G27720.1	Small nuclear ribonucleoprotein	Medtr8g058537.1	u6 snRNA-associated-like-Smprotein
Ca11356	Ca4	7710505	7714878	-0.595708	4.36828	-5.90656	4.78641e-06	3.80895e-05	3.81408	PREDICTED: zinc finger CCCH domain-containing protein 32 isoform X1 n_1 Tax_Cicer arietinum RepID_UPI00032A96DC	AT2G47850.3	Zinc finger C-x8-C-x5-C-x3-H type family	Medtr1g088875.3	zinc finger C-x8-C-x5-C-x3-H type protein
Ca11360	Ca4	7784286	7787738	-0.681898	5.73223	-6.33881	1.69265e-06	1.67675e-05	4.84194	PREDICTED: tubby-like F-box protein 3 n_1 Tax_Cicer arietinum RepID_UPI00032A5A22	AT2G47900.3	tubby like protein 3	Medtr1g088960.2	tubby-F-box-like protein
Ca11376	Ca4	7803046	7812757	0.718834	7.61272	5.15349	3.0549e-05	0.000165808	1.93568	Serine protease n_2 Tax_Cicer arietinum RepID_A0A059XQ60_CICAR	AT2G47940.1	DEGP protease 2	Medtr1g088980.1	DegP protease
Ca11371	Ca4	7853505	7855082	2.84195	2.06103	6.60059	9.11269e-07	1.02545e-05	5.78371	PREDICTED: protein SLOW WALKER 1 n_1 Tax_Cicer arietinum RepID_UPI00032A5723	AT2G47990.1	transducin family	Medtr1g089260.1	U3 small nucleolar RNA-associated protein%2C putative
Ca11380	Ca4	7889340	7891885	2.22746	3.87889	6.49513	1.16831e-06	1.2584e-05	5.28339	Gibberellin receptor n_7 Tax_Papilionoideae RepID_E3VJP7_9FABA	AT3G63010.1	alpha/beta-Hydrolases	Medtr1g089310.1	gibberellin receptor GID1c-like protein
Ca11383	Ca4	7958602	7961623	1.27767	0.595713	4.57684	0.000129364	0.000542113	1.14262	PREDICTED: putative E3 ubiquitin-protein ligase RF4 n_1 Tax_Cicer arietinum RepID_UPI00032A966D	AT1G03365.1	RING/U-box superfamily protein	Medtr1g089740.3	E3 ubiquitin-protein ligase RF298-like protein%2C putative
Ca11411	Ca4	8115049	8127026	2.54362	4.55242	8.01393	3.73932e-08	1.13029e-06	8.71509	GroEL-like chaperone - ATPase n_2 Tax_Papilionoideae RepID_Q1RSH4_MEDTR	AT3G23990.1	heat shock protein 60	Medtr1g090140.1	TCP-1/cpn60 chaperonin family protein
Ca11424	Ca4	8284368	8286586	-0.697898	4.05841	-4.82701	6.90612e-05	0.000323321	1.16534	PREDICTED: nudix hydrolase 26 - chloroplastic n_1 Tax_Cicer arietinum RepID_UPI00032A67CF	AT3G10620.1	nudix hydrolase homolog	Medtr1g090550.1	nudix hydrolase-like protein
Ca11432	Ca4	8311024	8318521	-0.482406	5.39569	-5.78299	6.46575e-06	4.80533e-05	3.49313	Uncharacterized protein n_12 Tax_Papilionoideae RepID_I1NHT9_SOYBN	AT5G03540.2	exocyst subunit exo70	Medtr1g090620.1	exocyst subunit exo70 family protein
Ca11464	Ca4	8489421	8493612	0.416939	8.26029	5.36402	1.81121e-05	0.00010834	2.4461	Malate dehydrogenase [NADP] - chloroplastic n_10 Tax_Papilionoideae RepID_MDHP_PEA	AT5G58330.1	lactate/malate dehydrogenase family	Medtr1g090730.2	NADP-dependent malate dehydrogenase
Ca11465	Ca4	8517602	8522999	0.356954	5.92602	4.8934	5.84832e-05	0.000282712	1.29341	Binding to TOMV RNA 1L (Long form) protein n_3 Tax_Papilionoideae RepID_B3SGL8_MEDTR	AT5G04430.1	binding to TOMV RNA 1L (long	Medtr1g090773.2	binding to TOMV RNA 1L (long form) protein
Ca11457	Ca4	8552976	8559265	-0.569106	4.22572	-4.80651	7.27012e-05	0.000337675	1.10128	PREDICTED: uncharacterized protein LOC101496957 n_1 Tax_Cicer arietinum RepID_UPI0006410029	AT5G04460.2	RING/U-box superfamily protein	Medtr1g090803.1	RING/U-box protein
Ca11473	Ca4	8626475	8629053	1.81101	2.08024	8.54246	1.21234e-08	5.2233e-07	10.0009	PREDICTED: uncharacterized protein LOC101504590 n_1 Tax_Cicer arietinum RepID_UPI00032A62F4	AT3G52170.2	DNA binding	Medtr1g090853.1	DNA-binding protein PD2
Ca11476	Ca4	8654217	8658285	-0.831321	4.04116	-8.13419	2.88446e-08	9.57002e-07	8.97816	SEC12p-like protein n_3 Tax_Papilionoideae RepID_A0A072VNK4_MEDTR	AT3G52190.1	phosphate transporter traffic facilitator1	Medtr1g090873.1	SEC12p-like protein
Ca11469	Ca4	8660119	8664495	2.09364	3.36406	6.15062	2.65477e-06	2.38011e-05	4.5494	U3 small nucleolar RNA-associated-like protein - putative n_2 Tax_Papilionoideae RepID_A0A072VPQ9_MEDTR	AT3G10530.1	Transducin/WD40 repeat-like superfamily	Medtr1g090877.1	U3 small nucleolar RNA-associated-like protein%2C putative
Ca11503	Ca4	8907587	8912067	-0.504946	5.17504	-6.99547	3.63794e-07	5.31684e-06	6.38923	PREDICTED: threonine dehydratase biosynthetic - chloroplastic-like n_2 Tax_Cicer arietinum RepID_UPI00032AAF03	AT3G10050.1	L-O-methylthreonine resistant 1	Medtr1g061800.1	threonine dehydratase biosynthetic protein
Ca11526	Ca4	9092276	9095136	0.998877	3.70384	8.65809	9.52257e-09	4.44441e-07	10.1181	PREDICTED: uncharacterized protein LOC101490156 n_1 Tax_Cicer arietinum RepID_UPI00032AAEDB	AT3G20930.1	RNA-binding (RRM/RBD/RNP motifs) family	Medtr1g092860.1	RNA-binding (RRM/RBD/RNP motif) family protein%2C putative
Ca11523	Ca4	9145202	9147582	-2.28353	4.19984	-14.04	7.13292e-13	2.19061e-09	19.5817	Myb-like transcription factor family protein n_1 Tax_Medicago truncatula RepID_G7I465_MEDTR			Medtr1g093080.3	myb-like transcription factor family protein
Ca11545	Ca4	9389736	9393584	1.72777	1.6834	9.2576	2.80032e-09	2.10896e-07	11.4074	Uncharacterized protein n_2 Tax_Papilionoideae RepID_G7I4Z2_MEDTR	AT3G25620.1	ABC-2 type transporter family protein	Medtr1g093990.1	white-brown-complex ABC transporter family protein
Ca11542	Ca4	9395564	9396523	-2.66538	5.83423	-7.32685	1.70945e-07	3.11633e-06	7.15274	Putative uncharacterized protein (Fragment) n_1 Tax_Cicer arietinum RepID_B0L636_CICAR			#N/A	#N/A
Ca11550	Ca4	9462474	9466601	-0.698812	5.97611	-7.03328	3.33521e-07	4.9671e-06	6.47991	PREDICTED: protein indeterminate-domain 4 - chloroplastic-like n_1 Tax_Cicer arietinum RepID_UPI00032ACBB2	AT2G02080.1	indeterminate(ID)-domain	Medtr1g112270.2	C2H2 zinc finger protein%2C putative
Ca11554	Ca4	9473948	9482755	-2.12223	0.865102	-7.2955	1.83496e-07	3.26593e-06	7.34174	No Hits			Medtr6g029530.1	galactose-1-phosphate uridylyltransferase
Ca11543	Ca4	9476360	9477866	1.01052	2.61373	5.15463	3.04624e-05	0.000165455	2.17855	No Hits			#N/A	#N/A
Ca11566	Ca4	9495812	9503498	-0.750074	2.97097	-5.60665	9.95642e-06	6.6674e-05	3.22157	PREDICTED: uncharacterized protein LOC101501047 n_1 Tax_Cicer arietinum RepID_UPI00032AC393	AT4G23160.1	cysteine-rich RLK (RECEPTOR-like	Medtr7g015680.1	hypothetical protein
Ca11562	Ca4	9504874	9509704	0.597079	6.10389	5.22865	2.53392e-05	0.00014296	2.12905	PREDICTED: serine carboxypeptidase-like n_1 Tax_Cicer arietinum RepID_UPI00032A84AF	AT3G45010.1	serine carboxypeptidase-like	Medtr1g094155.1	serine carboxypeptidase-like protein
Ca11564	Ca4	9511400	9514157	-0.757445	6.16243	-5.13183	3.22417e-05	0.000172879	1.8891	PREDICTED: uncharacterized protein LOC101502123 isoform X1 n_1 Tax_Cicer arietinum RepID_UPI00032A716D			#N/A	#N/A
Ca11565	Ca4	9517483	9518795	1.17335	2.52978	8.22792	2.35935e-08	8.35329e-07	9.31183	PREDICTED: 54S ribosomal protein L51 - mitochondrial-like n_1 Tax_Cicer arietinum RepID_UPI00032A8BC4	AT3G59650.2	mitochondrial ribosomal protein L51/S25/CI-B8	Medtr8g022770.1	ribosomal protein L51/S25/CI-B8 domain protein
Ca11559	Ca4	9577833	9582201	0.889739	5.7957	11.246	6.65282e-11	1.87095e-08	15.0618	PREDICTED: uncharacterized protein LOC101503937 isoform X1 n_2 Tax_Cicer arietinum RepID_UPI00032AA3B8			Medtr1g094190.1	RNA pseudouridine synthase
Ca11570	Ca4	9661435	9666249	1.70263	5.73911	6.56636	9.87669e-07	1.09676e-05	5.3855	Transmembrane amino acid transporter family protein n_3 Tax_Papilionoideae RepID_G7I4Z9_MEDTR	AT2G39130.1	Transmembrane amino acid transporter	Medtr1g094620.4	transmembrane amino acid transporter family protein
Ca11568	Ca4	9667695	9674394	-0.602783	5.45388	-5.89461	4.9273e-06	3.89473e-05	3.76591	PREDICTED: pumilio homolog 4 isoform X1 n_4 Tax_Cicer arietinum RepID_UPI00032A87CB	AT3G10360.1	pumilio 4	Medtr1g094630.1	pumilio-family RNA-binding repeatprotein
Ca11588	Ca4	9699125	9703324	-0.566768	6.65519	-7.8547	5.28851e-08	1.37992e-06	8.33963	Arsenical pump-driving ATPase-like protein n_5 Tax_Papilionoideae RepID_G7I505_MEDTR	AT3G10350.1	P-loop containing nucleoside triphosphate	Medtr1g094680.2	arsenical pump-driving ATPase-like protein
Ca11585	Ca4	9704825	9706935	0.635819	3.35156	5.83516	5.69379e-06	4.35432e-05	3.73276	PREDICTED: DNL-type zinc finger protein n_1 Tax_Cicer arietinum RepID_UPI00032AA4B3	AT3G54826.1	Zim17-type zinc finger protein	Medtr1g094720.1	DNL zinc finger protein
Ca11578	Ca4	9783304	9789069	0.743042	4.36009	5.47995	1.36e-05	8.55313e-05	2.77063	Dolichyl-diphosphooligosaccharide--protein glycosyltransferase subunit 1 n_2 Tax_Papilionoideae RepID_G7I373_MEDTR	AT2G01720.1	Ribophorin I	Medtr1g094870.1	ribophorin I family protein
Ca11589	Ca4	9834297	9837931	1.174	4.57828	5.87863	5.12237e-06	4.01366e-05	3.74492	PREDICTED: GATA transcription factor 8 n_1 Tax_Cicer arietinum RepID_UPI00032ABED0	AT3G54810.1	Plant-specific	Medtr1g094930.1	GATA type zinc finger transcription factor family protein
Ca11604	Ca4	10032349	10041582	0.433975	7.42209	5.27133	2.2791e-05	0.000130851	2.23111	PREDICTED: uncharacterized aarF domain-containing protein kinase At1g79600 - chloroplastic n_1 Tax_Cicer arietinum RepID_UPI00032A9781	AT2G39190.1	Protein kinase superfamily protein	Medtr1g095480.1	AarF domain kinase
Ca11606	Ca4	10064502	10067509	-0.938352	4.8431	-7.58711	9.54179e-08	2.08488e-06	7.7439	PREDICTED: serine carboxypeptidase-like 27 n_1 Tax_Cicer arietinum RepID_UPI00032ABC31	AT3G07990.1	serine carboxypeptidase-like	Medtr1g095560.2	serine carboxypeptidase-like protein
Ca11618	Ca4	10090385	10095700	-0.81583	3.30266	-7.13364	2.65061e-07	4.17787e-06	6.80682	PREDICTED: RNA pseudouridine synthase 5 n_1 Tax_Cicer arietinum RepID_UPI00032AA58C	AT3G52260.1	Pseudouridine synthase family protein	Medtr1g095580.1	pseudouridine synthase Rlu family protein
Ca11610	Ca4	10146458	10151529	0.560378	4.03002	5.6235	9.55297e-06	6.48813e-05	3.1446	Uncharacterized protein n_1 Tax_Populus trichocarpa RepID_U5GAS9_POPTR	AT5G51280.1	DEAD-box protein abstrakt, putative	Medtr1g095810.1	DEAD-box ATP-dependent RNA helicase
Ca11641	Ca4	10310467	10311981	-0.649095	4.5487	-5.08656	3.60928e-05	0.000189509	1.78437	PREDICTED: protein SENSITIVE TO PROTON RHIZOTOXICITY 1 n_1 Tax_Cicer arietinum RepID_UPI00032A9B70	AT1G34370.1	C2H2 and C2HC zinc fingers superfamily	Medtr1g093095.1	C2H2-type zinc finger protein
Ca11634	Ca4	10369795	10372000	-0.791402	6.35703	-7.66335	8.05715e-08	1.83931e-06	7.91463	PREDICTED: uncharacterized protein LOC101490159 n_1 Tax_Cicer arietinum RepID_UPI00032A7CBB	AT4G09620.1	Mitochondrial transcription termination	Medtr1g096340.2	transcription termination factor family protein
Ca11649	Ca4	10413683	10416957	-0.638667	5.56748	-5.62105	9.61059e-06	6.51569e-05	3.09605	Calmodulin-domain kinase CDPK protein n_2 Tax_Papilionoideae RepID_A0A072VP17_MEDTR	AT1G35670.1	calcium-dependent	Medtr1g096490.1	calmodulin-domain kinase CDPK protein
Ca11672	Ca4	10722523	10725127	1.38774	3.03952	6.98019	3.76816e-07	5.44744e-06	6.49815	Uncharacterized protein n_9 Tax_Papilionoideae RepID_I1LDA9_SOYBN	AT1G69640.1	sphingoid base hydroxylase 1	Medtr1g097310.2	sphingoid base hydroxylase-like protein
Ca11669	Ca4	10768217	10772177	2.05633	2.24902	6.78187	5.96377e-07	7.49514e-06	6.15038	PREDICTED: polyadenylate-binding protein 3-like isoform X1 n_2 Tax_Cicer arietinum RepID_UPI00032A8321	AT1G71770.2	poly(A)-binding protein 5	Medtr1g097440.2	polyadenylate-binding protein
Ca11683	Ca4	10841214	10844142	0.674741	5.95233	5.76146	6.81471e-06	4.99455e-05	3.44348	PREDICTED: ran-binding protein 1 homolog b-like n_1 Tax_Cicer arietinum RepID_UPI00032A6ABB	AT1G07140.1	Pleckstrin homology (PH) domain	Medtr1g097600.2	Ran-binding protein 2%2C Ran-binding domain protein
Ca11696	Ca4	10940014	10942340	0.854918	6.67159	5.56071	1.11466e-05	7.2548e-05	2.95161	Uncharacterized protein n_2 Tax_Maloideae RepID_M5Y590_PRUPE	AT4G09800.1	S18 ribosomal protein	Medtr1g098170.1	ribosomal protein S13P/S18e
Ca11695	Ca4	10963492	10966046	-0.635216	7.6347	-5.8117	6.02853e-06	4.53915e-05	3.56163	PREDICTED: uncharacterized protein LOC101513041 n_1 Tax_Cicer arietinum RepID_UPI00032A5F5D	AT1G34000.1	one-helix protein 2	Medtr1g098280.1	light-harvesting complex I chlorophyll A/B-binding protein
Ca11707	Ca4	11051512	11054666	1.525	7.93261	8.29729	2.03484e-08	7.49948e-07	9.29142	Putative uncharacterized protein n_10 Tax_Magnoliophyta RepID_F6GY49_VITVI	AT1G43170.4	ribosomal protein 1	Medtr1g098540.1	60S ribosomal protein L3B
Ca11709	Ca4	11065988	11070185	-0.460741	3.2624	-4.96686	4.86656e-05	0.000242062	1.59933	PREDICTED: G-box-binding factor 4-like n_1 Tax_Cicer arietinum RepID_UPI00032AD103	AT5G44080.1	Basic-leucine zipper (bZIP) transcription	Medtr1g098590.2	BZIP transcription factor
Ca11718	Ca4	11089010	11091666	1.08157	2.78123	5.11829	3.33479e-05	0.000177473	2.06049	PREDICTED: uncharacterized protein LOC101492422 n_1 Tax_Cicer arietinum RepID_UPI00032A8523	AT1G43580.1	Sphingomyelin synthetase family protein	Medtr1g098650.1	plant inositol phosphorylceramide synthase
Ca11720	Ca4	11096586	11098416	1.51804	4.8721	5.97998	4.00602e-06	3.30842e-05	3.98447	Uncharacterized protein n_2 Tax_Maloideae RepID_M5Y590_PRUPE	AT4G09800.1	S18 ribosomal protein	Medtr1g098170.1	ribosomal protein S13P/S18e
Ca11719	Ca4	11143747	11147182	-0.6014	3.95284	-5.76731	6.71792e-06	4.94231e-05	3.502	Tubby-like F-box protein n_2 Tax_Papilionoideae RepID_G7ICY3_MEDTR	AT1G76900.2	tubby like protein 1	Medtr1g098790.4	tubby-F-box-like protein
Ca11732	Ca4	11471432	11477919	0.885988	5.31738	9.17217	3.32444e-09	2.31124e-07	11.1271	ABC transporter-like family-protein n_3 Tax_Papilionoideae RepID_G7ID28_MEDTR	AT3G59140.1	multidrug resistance-associated	Medtr1g099280.1	ABC transporter-like family-protein
Ca11745	Ca4	11492426	11496531	1.27467	2.98436	6.0199	3.63739e-06	3.06017e-05	4.23766	Pyruvate kinase n_2 Tax_Papilionoideae RepID_G7IDV6_MEDTR	AT5G52920.1	plastidic pyruvate	Medtr1g099360.1	pyruvate kinase family protein
Ca11750	Ca4	11601768	11603182	-1.12229	2.19342	-5.03968	4.05718e-05	0.000208307	1.99752	PREDICTED: probable membrane-associated kinase regulator 5 n_1 Tax_Cicer arietinum RepID_UPI00032A66C2	AT5G52870.1	unknown protein; BEST Arabidopsis thaliana	Medtr1g099550.1	membrane-associated kinase regulator%2C putative
Ca11770	Ca4	11853841	11857375	0.690016	6.18614	6.04915	3.3894e-06	2.89775e-05	4.14604	PREDICTED: sec-independent protein translocase protein TATB - chloroplastic n_1 Tax_Cicer arietinum RepID_UPI00032AA290			Medtr1g100220.1	sec-independent protein translocase
Ca11775	Ca4	11935191	11939455	-0.719641	4.84473	-5.6955	8.00718e-06	5.62614e-05	3.28323	PREDICTED: protein NLP6 n_1 Tax_Cicer arietinum RepID_UPI00032A8320	AT1G64530.1	Plant regulator RWP-RK family protein	Medtr1g100970.2	plant regulator RWP-RK family protein
Ca11785	Ca4	12053159	12055484	1.05654	7.50869	6.70408	7.15022e-07	8.4786e-06	5.70621	Uncharacterized protein n_7 Tax_Pentapetalae RepID_M5VXY9_PRUPE	AT5G23860.2	tubulin beta 8	Medtr1g101130.1	tubulin beta-1 chain
Ca11784	Ca4	12065074	12067673	1.71862	2.37854	7.39161	1.47736e-07	2.84239e-06	7.52341	PREDICTED: zinc finger CCHC domain-containing protein 9-like n_1 Tax_Cicer arietinum RepID_UPI00032AB085	AT5G52380.1	VASCULAR-RELATED NAC-DOMAIN 6	#N/A	#N/A
Ca11782	Ca4	12071293	12077676	1.13525	3.28032	5.42301	1.56531e-05	9.60733e-05	2.74917	PREDICTED: titin-like n_1 Tax_Cicer arietinum RepID_UPI00032AC88C			#N/A	#N/A
Ca11800	Ca4	12113327	12118174	7.22578	3.3987	6.27101	1.9897e-06	1.9056e-05	4.95917	PREDICTED: low-temperature-induced 65 kDa protein-like isoform X3 n_1 Tax_Cicer arietinum RepID_UPI000641089C			Medtr1g100627.1	hypothetical protein
Ca11817	Ca4	12390082	12393447	-2.65503	0.950353	-10.4278	2.928e-10	4.76423e-08	13.3228	PREDICTED: F-box protein PP2-A13 n_1 Tax_Cicer arietinum RepID_UPI00032ACEC1	AT5G52120.1	phloem protein 2-A14	Medtr1g101390.1	F-box protein PP2-A13
Ca11818	Ca4	12405933	12407295	-0.51657	3.72698	-6.70551	7.12638e-07	8.47574e-06	5.77149	PREDICTED: BAG family molecular chaperone regulator 1 n_1 Tax_Cicer arietinum RepID_UPI00032A9C5C	AT5G52060.1	BCL-2-associated athanogene	Medtr0086s0010.1	BAG family molecular chaperone regulator-like protein
Ca11819	Ca4	12440377	12443520	-0.973288	6.40634	-6.4014	1.45867e-06	1.49333e-05	4.99527	PREDICTED: traB domain-containing protein isoform X1 n_2 Tax_Cicer arietinum RepID_UPI00032AB0B2	AT5G52030.1	TraB family protein	Medtr1g101540.1	TraB family protein
Ca11832	Ca4	12560177	12564080	0.776437	3.96851	5.85872	5.37644e-06	4.15317e-05	3.72742	PfkB family carbohydrate kinase n_2 Tax_Papilionoideae RepID_G7IC32_MEDTR	AT1G66430.1	pfkB-like carbohydrate kinase family	Medtr1g101950.1	pfkB family carbohydrate kinase
Ca11835	Ca4	12608094	12609955	-1.15745	2.33682	-5.17747	2.87783e-05	0.000158061	2.29098	Gibberellin 20-oxidase n_3 Tax_Papilionoideae RepID_G7IC45_MEDTR	AT5G51810.1	gibberellin	Medtr1g102070.1	gibberellin 20-oxidase
Ca11843	Ca4	12620686	12623805	-1.71185	5.00338	-10.2946	3.75427e-10	5.57084e-08	13.3244	PREDICTED: uncharacterized protein LOC103333282 n_1 Tax_Prunus mume RepID_UPI00046DF5E3	AT5G62180.1	carboxyesterase 20	Medtr1g102160.1	gibberellin receptor GID1%2C putative
Ca11854	Ca4	12718261	12720116	0.630481	2.81541	5.27711	2.24663e-05	0.000129181	2.44084	PREDICTED: uncharacterized protein LOC101495111 n_1 Tax_Cicer arietinum RepID_UPI00032A6775	AT5G62200.1	Embryo-specific protein 3, (ATS3)	Medtr1g102420.1	embryo-specific protein
Ca11857	Ca4	12881188	12888196	1.68746	9.35133	5.75013	7.00581e-06	5.10743e-05	3.35765	Aldo/keto reductase family oxidoreductase n_3 Tax_Papilionoideae RepID_A0A072VPP5_MEDTR	AT3G22840.1	Chlorophyll A-B binding	Medtr1g102570.1	early light-induced-like protein
Ca11867	Ca4	12915888	12918838	-0.596171	6.51782	-5.56382	1.10618e-05	7.2135e-05	2.96058	PREDICTED: uncharacterized protein LOC101502642 n_1 Tax_Cicer arietinum RepID_UPI00032AC57B	AT4G38225.2	unknown protein; FUNCTIONS IN: molecular_function	Medtr1g102880.1	hypothetical protein
Ca11866	Ca4	12971733	12974745	-1.40635	3.01946	-7.58827	9.51707e-08	2.08246e-06	7.86941	PREDICTED: uncharacterized protein LOC101505664 isoform X1 n_2 Tax_Cicer arietinum RepID_UPI00032AA9D8	AT3G22810.1	Plant protein of unknown function (DUF828)	Medtr1g102980.2	auxin canalisation protein
Ca11874	Ca4	13022172	13024469	1.36613	4.22749	7.39051	1.48101e-07	2.84573e-06	7.33476	40S ribosomal protein S3a n_23 Tax_rosids RepID_C6TLT3_SOYBN	AT4G34670.1	Ribosomal protein S3Ae	Medtr1g103100.1	40S ribosomal protein S3a-1
Ca11880	Ca4	13037028	13043846	1.23128	3.07696	6.36655	1.58454e-06	1.59655e-05	5.06298	PREDICTED: protein NETWORKED 1A-like n_1 Tax_Cicer arietinum RepID_UPI00032A7991	AT3G22790.1	Kinase interacting (KIP1-like) family	Medtr1g103160.2	kinase interacting (KIP1-like) family protein
Ca11903	Ca4	13181544	13187658	-0.657885	4.50664	-6.27234	1.9834e-06	1.90076e-05	4.69312	PREDICTED: folate-biopterin transporter 1 - chloroplastic isoform X1 n_2 Tax_Cicer arietinum RepID_UPI00032ABFBD	AT2G32040.1	Major facilitator superfamily protein	Medtr1g103530.2	folate/biopterin transporter
Ca11907	Ca4	13187837	13189589	-0.720985	2.21616	-5.21155	2.64397e-05	0.000147918	2.38132	PREDICTED: serine/threonine-protein phosphatase 7 long form homolog n_1 Tax_Cicer arietinum RepID_UPI000640EB4C			#N/A	#N/A
Ca11933	Ca4	13468757	13481359	-0.438613	5.9261	-5.44747	1.47353e-05	9.14306e-05	2.67045	Long chain acyl-CoA synthetase 7 - peroxisomal protein n_3 Tax_Papilionoideae RepID_G7ID84_MEDTR	AT3G05970.1	long-chain acyl-CoA synthetase	Medtr1g104810.1	long chain acyl-CoA synthetase 7%2C peroxisomal protein
Ca11936	Ca4	13525478	13535356	-0.474431	5.52705	-5.69175	8.08107e-06	5.66712e-05	3.26974	ARM repeat protein interacting WITH ABF2 protein n_1 Tax_Medicago truncatula RepID_G7IE13_MEDTR	AT5G19330.1	ARM repeat protein interacting	Medtr1g104870.1	ARM repeat protein interacting WITH ABF2 protein
Ca11945	Ca4	13659572	13661606	0.585054	12.699	6.96915	3.86522e-07	5.54583e-06	6.13263	Thiazole biosynthetic enzyme n_4 Tax_Pentapetalae RepID_A0A072W0W5_MEDTR	AT5G54770.1	thiazole biosynthetic	Medtr1g105480.1	thiazole biosynthetic enzyme
Ca11965	Ca4	13739584	13743046	3.07874	1.65799	6.75516	6.34663e-07	7.82205e-06	6.16547	PREDICTED: cysteine-rich receptor-like protein kinase 25 n_1 Tax_Cicer arietinum RepID_UPI00032A6DB0	AT4G23180.1	cysteine-rich RLK (RECEPTOR-like	Medtr1g105595.2	cysteine-rich receptor-kinase-like protein
Ca11982	Ca4	13922603	13931914	-0.518522	6.98352	-4.96579	4.8796e-05	0.000242632	1.47511	PREDICTED: pyruvate kinase isozyme A - chloroplastic-like n_1 Tax_Cicer arietinum RepID_UPI00032ABA5B	AT3G22960.1	Pyruvate kinase family	Medtr1g105965.3	pyruvate kinase family protein
Ca11990	Ca4	14019302	14019841	1.2336	2.03941	6.34421	1.67104e-06	1.66495e-05	5.15313	PREDICTED: phytosulfokines 3-like n_1 Tax_Cicer arietinum RepID_UPI00032A4F06			Medtr1g106030.1	phytosulfokine precursor protein
Ca11992	Ca4	14031301	14031966	-0.980135	5.59931	-5.6766	8.38657e-06	5.84385e-05	3.23296	PREDICTED: uncharacterized protein LOC101515656 n_1 Tax_Cicer arietinum RepID_UPI00032AC995			Medtr1g106075.1	photosystem I reaction center subunit N
Ca12041	Ca4	14388027	14392246	1.576	2.39796	6.86853	4.8767e-07	6.56016e-06	6.34578	PREDICTED: alpha-L-fucosidase 2 n_1 Tax_Cicer arietinum RepID_UPI00032A8CC3	AT4G34260.1	1,2-alpha-L-fucosidases	Medtr1g107135.1	alpha-L-fucosidase-like protein
Ca12050	Ca4	14493979	14496606	-0.875997	6.06841	-5.05599	3.89529e-05	0.000201143	1.6997	Probable cinnamyl alcohol dehydrogenase n_8 Tax_Papilionoideae RepID_CADH_MEDSA	AT3G19450.1	GroES-like	Medtr1g107425.1	cinnamyl alcohol dehydrogenase-like protein
Ca12051	Ca4	14570000	14573221	2.78672	3.25132	8.56795	1.14932e-08	5.052e-07	9.98655	D-3-phosphoglycerate dehydrogenase n_8 Tax_Papilionoideae RepID_A0A072VR00_MEDTR	AT4G34200.1	D-3-phosphoglycerate dehydrogenase	Medtr1g107480.1	D-3-phosphoglycerate dehydrogenase family protein
Ca12055	Ca4	14573630	14580281	0.529032	5.79836	5.61341	9.79251e-06	6.6039e-05	3.07898	Na+/H+ antiporter n_2 Tax_Papilionoideae RepID_A0A072VQN5_MEDTR	AT3G19490.1	sodium:hydrogen antiporter	Medtr1g107485.1	Na+/H+ antiporter
Ca12073	Ca4	14651824	14657980	-0.365119	5.87459	-6.20846	2.31085e-06	2.13949e-05	4.52965	Phosphatidylinositol-3 -4 -5-trisphosphate 3-phosphatase n_2 Tax_Papilionoideae RepID_A0A072VR13_MEDTR	AT3G50110.1	PTEN 3	Medtr1g107540.1	phosphatidylinositol-3%2C4%2C5-trisphosphate 3-phosphatase
Ca12074	Ca4	14672826	14676949	-1.595	6.02219	-12.4189	9.03252e-12	6.75917e-09	17.0596	PREDICTED: multicopper oxidase LPR2-like n_1 Tax_Cicer arietinum RepID_UPI00032A993F	AT1G71040.1	Cupredoxin superfamily protein	Medtr1g107555.1	spore coat A-like protein
Ca12083	Ca4	14840950	14846472	-1.35796	5.37994	-7.50694	1.14083e-07	2.35796e-06	7.55924	Repressor of RNA polymerase III transcription n_3 Tax_Papilionoideae RepID_G7IAU6_MEDTR			Medtr1g108610.2	repressor of RNA polymerase III transcription MAF1 protein
Ca12098	Ca4	14904458	14907877	-0.849468	7.34535	-6.61525	8.80411e-07	1.00044e-05	5.49957	PREDICTED: fruit protein pKIWI502 n_1 Tax_Cicer arietinum RepID_UPI00032A54A9	AT1G15140.3	FAD/NAD(P)-binding oxidoreductase	Medtr1g108710.1	ferredoxin reductase-like NAD(P) binding domain protein
Ca12093	Ca4	14944580	14948233	0.47541	7.79706	4.85605	6.42152e-05	0.000305117	1.19188	PREDICTED: sec-independent protein translocase protein TATC - chloroplastic n_1 Tax_Cicer arietinum RepID_UPI00032ABB2D	AT2G01110.1	Sec-independent	Medtr1g109080.1	Sec-independent protein translocase TatC
Ca12101	Ca4	15002201	15006261	0.57096	6.01407	5.74453	7.10238e-06	5.15327e-05	3.40239	Fructose-bisphosphate aldolase n_6 Tax_Papilionoideae RepID_A0A072VQ58_MEDTR	AT2G01140.1	Aldolase superfamily protein	Medtr1g109200.1	fructose-bisphosphate aldolase
Ca12106	Ca4	15088987	15090779	1.24511	4.05193	7.22157	2.16968e-07	3.67909e-06	6.95119	PREDICTED: putative zinc finger protein At1g68190 n_1 Tax_Cicer arietinum RepID_UPI00032A539B	AT1G68190.1	B-box zinc finger family protein	Medtr1g109350.1	B-box zinc finger protein%2C putative
Ca12116	Ca4	15195389	15201367	-0.575632	4.17292	-4.81922	7.04225e-05	0.000329191	1.13976	PREDICTED: lipid phosphate phosphatase 2-like n_1 Tax_Cicer arietinum RepID_UPI00032A5670	AT1G15080.1	lipid phosphate	Medtr1g109430.2	lipid phosphate phosphatase-like protein
Ca12113	Ca4	15260026	15269555	-0.581717	4.25484	-6.76077	6.26416e-07	7.74538e-06	5.86388	Nucleotidyltransferase n_5 Tax_Papilionoideae RepID_A0A072VR82_MEDTR	ATMG00860.1	DNA/RNA polymerases superfamily	Medtr1g109590.2	nucleotidyltransferase
Ca12118	Ca4	15269553	15269955	-1.84806	1.88434	-6.22461	2.2232e-06	2.0734e-05	4.89724	PREDICTED: uncharacterized protein LOC101512196 n_1 Tax_Cicer arietinum RepID_UPI00032A5605			#N/A	#N/A
Ca12120	Ca4	15336821	15340954	-0.946889	5.17903	-8.1189	2.98095e-08	9.76309e-07	8.91346	PREDICTED: uncharacterized protein LOC101515007 n_1 Tax_Cicer arietinum RepID_UPI00032AAD93	AT1G15030.1	Protein of unknown function (DUF789)	Medtr1g110070.1	DUF789 family protein
Ca12143	Ca4	15730123	15732117	-0.788425	4.84041	-6.50548	1.1401e-06	1.23673e-05	5.24251	PREDICTED: uncharacterized protein LOC101498397 n_1 Tax_Cicer arietinum RepID_UPI00032AC83B	AT1G68490.1	unknown protein; FUNCTIONS IN: molecular_function	Medtr1g110760.1	hypothetical protein
Ca12155	Ca4	15833385	15834875	-0.845101	6.68058	-6.76881	6.14794e-07	7.62634e-06	5.86518	Uncharacterized protein n_1 Tax_Musa acuminata subsp. malaccensis RepID_M0RJ75_MUSAM	AT1G68530.1	3-ketoacyl-CoA	Medtr1g110930.1	3-ketoacyl-CoA synthase-like protein
Ca12154	Ca4	15867703	15870174	1.13211	4.26266	6.36388	1.59466e-06	1.60568e-05	4.92974	PREDICTED: ethylene-responsive transcription factor ERF118 n_1 Tax_Cicer arietinum RepID_UPI00032AA44A	AT1G68550.2	Integrase-type DNA-binding superfamily	Medtr8g023680.1	ethylene-responsive transcription factor ERF118-like protein
Ca12165	Ca4	16065650	16069685	-1.86485	6.61789	-11.1889	7.36033e-11	1.97502e-08	14.9615	PREDICTED: uncharacterized protein ycf45 n_1 Tax_Cicer arietinum RepID_UPI00032AA7D0	AT3G10420.2	P-loop containing nucleoside triphosphate	Medtr1g111400.1	P-loop nucleoside triphosphate hydrolase superfamily protein
Ca12175	Ca4	16077493	16079679	0.713776	6.97093	6.85469	5.03571e-07	6.70917e-06	6.06489	40S ribosomal S3-like protein n_14 Tax_fabids RepID_B7FH64_MEDTR	AT2G31610.1	Ribosomal protein S3 family protein	Medtr1g044660.1	40S ribosomal S3-like protein
Ca12179	Ca4	16129148	16135614	1.60778	2.70709	6.46675	1.2494e-06	1.32014e-05	5.36502	PREDICTED: probable pectate lyase 18 n_1 Tax_Cicer arietinum RepID_UPI00032AA159	AT5G04310.1	Pectin lyase-like superfamily protein	Medtr1g111590.1	pectate lyase family protein
Ca12191	Ca4	16289854	16291424	0.56101	5.27989	5.1313	3.22846e-05	0.000172896	1.88389	40S ribosomal protein S27 n_14 Tax_Spermatophyta RepID_A0A0D2MUG4_GOSRA	AT3G61110.1	ribosomal protein S27	Medtr1g111970.1	40S ribosomal protein S27-1
Ca12195	Ca4	16301662	16303682	1.63841	0.870163	6.79509	5.78314e-07	7.37373e-06	6.25166	Putative uncharacterized protein n_2 Tax_Cicer arietinum RepID_Q8L5X7_CICAR			Medtr1g111990.1	transmembrane protein%2C putative
Ca12201	Ca4	16313777	16317200	0.659915	3.4187	5.58876	1.04038e-05	6.8807e-05	3.12076	PREDICTED: uncharacterized protein LOC101490047 n_1 Tax_Cicer arietinum RepID_UPI00032A67AE			Medtr1g112080.1	dual specificity phosphatase domain protein
Ca12193	Ca4	16321337	16334156	0.766298	3.74832	6.32783	1.73751e-06	1.70682e-05	4.88122	PREDICTED: tubulin-folding cofactor D n_1 Tax_Cicer arietinum RepID_UPI00032A5D68	AT3G60740.1	ARM repeat	Medtr1g112130.2	beta-tubulin folding cofactor D
Ca12204	Ca4	16398004	16403262	0.64391	5.72286	7.54376	1.05085e-07	2.23436e-06	7.64346	Proteasome subunit alpha type-5-A isoform 1 n_2 Tax_Theobroma cacao RepID_A0A061GDA5_THECC	AT1G53850.2	20S proteasome alpha subunit E1	Medtr1g112250.2	20S proteasome subunit alpha
Ca12206	Ca4	16407430	16414461	0.580973	5.11261	8.21827	2.40854e-08	8.39655e-07	9.12975	PREDICTED: protein indeterminate-domain 5 - chloroplastic n_1 Tax_Cicer arietinum RepID_UPI00032AC6CF	AT2G02080.1	indeterminate(ID)-domain	Medtr1g112270.2	C2H2 zinc finger protein%2C putative
Ca12202	Ca4	16427305	16435937	-1.62609	5.0133	-6.13115	2.78195e-06	2.48084e-05	4.34281	PREDICTED: protein ACCUMULATION AND REPLICATION OF CHLOROPLASTS 3 isoform X1 n_2 Tax_Cicer arietinum RepID_UPI00032AA5CD	AT1G75010.1	GTP binding	Medtr1g112280.2	protein accumulation AND replication OFs protein
Ca12235	Ca4	16597591	16627235	-1.02221	2.20078	-5.6781	8.35587e-06	5.82512e-05	3.52322	FAD/NAD(P)-binding oxidoreductase family protein n_1 Tax_Medicago truncatula RepID_A0A072W2C4_MEDTR	AT4G38540.1	FAD/NAD(P)-binding oxidoreductase family	Medtr1g112740.1	FAD-dependent urate hydroxylase-like protein
Ca12227	Ca4	16670736	16674289	0.442892	3.41561	4.74379	8.50808e-05	0.00038394	1.02782	PREDICTED: probable protein phosphatase 2C 79 n_1 Tax_Cicer arietinum RepID_UPI00032A8397	AT3G51370.2	Protein phosphatase 2C family protein	Medtr1g112840.1	serine/threonine phosphatase family%2C 2C domain protein
Ca12230	Ca4	16683435	16686878	-0.548523	6.81942	-5.80245	6.16599e-06	4.61846e-05	3.54599	PREDICTED: protein CHAPERONE-LIKE PROTEIN OF POR1 - chloroplastic n_1 Tax_Cicer arietinum RepID_UPI00032AB879	AT2G20920.1	Protein of unknown function (DUF3353)	Medtr1g112860.1	transmembrane protein%2C putative
Ca12238	Ca4	16688400	16695237	0.620493	7.28953	5.42255	1.56708e-05	9.61429e-05	2.60716	Uncharacterized protein n_2 Tax_Musa acuminata subsp. malaccensis RepID_M0TMV8_MUSAM	AT4G38510.5	ATPase, V1 complex, subunit B protein	Medtr7g081010.1	archaeal/vacuolar-type H+-ATPase subunit B
Ca12249	Ca4	16796407	16801315	1.53314	4.81745	7.42333	1.37573e-07	2.70807e-06	7.38036	PREDICTED: mechanosensitive ion channel protein 6-like n_1 Tax_Cicer arietinum RepID_UPI00032A6B3C	AT1G78610.1	mechanosensitive channel of small	Medtr1g113850.1	mechanosensitive ion channel family protein
Ca12251	Ca4	16823477	16826511	2.57718	4.79108	8.86611	6.19464e-09	3.44535e-07	10.5198	Uncharacterized protein n_17 Tax_Papilionoideae RepID_I1MYV4_SOYBN	AT4G25630.1	fibrillarin 2	Medtr1g114000.1	mediator of RNA polymerase II transcription subunit 36a
Ca12250	Ca4	16838386	16846360	-0.500054	3.97454	-5.19645	2.74515e-05	0.000151962	2.09036	ACT-like tyrosine kinase family protein n_4 Tax_Papilionoideae RepID_G7IDD3_MEDTR	AT4G38470.1	ACT-like protein tyrosine kinase family	Medtr1g113960.2	ACT-like tyrosine kinase family protein
Ca12258	Ca4	16956744	16966713	0.618753	4.96348	5.34549	1.89625e-05	0.000112634	2.41843	Uncharacterized protein n_4 Tax_Soja RepID_I1MM02_SOYBN	AT5G19690.1	staurosporin and temperature sensitive	Medtr1g114250.1	oligosaccharyltransferase subunit STT3
Ca12280	Ca4	16992485	16995370	-0.743712	7.92458	-7.95702	4.23085e-08	1.19083e-06	8.55521	PREDICTED: thioredoxin X - chloroplastic n_1 Tax_Cicer arietinum RepID_UPI00032A66C4	AT1G50320.1	thioredoxin X	Medtr1g114290.1	thioredoxin-like protein
Ca12275	Ca4	17067776	17069531	0.559331	3.47675	5.79396	6.29508e-06	4.69904e-05	3.61652	Prefoldin subunit 5 n_2 Tax_Medicago truncatula RepID_G7IE99_MEDTR	AT5G23290.1	prefoldin 5	Medtr1g114500.1	prefoldin subunit 5
Ca12296	Ca4	17090565	17101272	-0.518021	7.50784	-5.1054	3.44366e-05	0.000182631	1.81752	P-loop nucleoside triphosphate hydrolase superfamily protein n_2 Tax_Papilionoideae RepID_G7IEA4_MEDTR	AT3G19960.1	myosin 1	Medtr1g114540.1	P-loop nucleoside triphosphate hydrolase superfamily protein
Ca12295	Ca4	17150739	17156309	0.673449	4.36707	8.09668	3.12709e-08	1.01332e-06	8.88501	PREDICTED: calumenin n_1 Tax_Cicer arietinum RepID_UPI00032AD0B0	AT5G08580.1	Calcium-binding EF hand family protein	Medtr1g115135.2	calcium-binding EF hand-like protein
Ca12312	Ca4	17219947	17227299	-0.931128	5.37221	-5.74488	7.09624e-06	5.15126e-05	3.39964	PREDICTED: prolyl endopeptidase-like n_1 Tax_Cicer arietinum RepID_UPI00032AAB44	AT1G50380.1	Prolyl oligopeptidase family protein	Medtr1g115230.1	prolyl oligopeptidase family protein
Ca12309	Ca4	17228749	17231286	1.2379	4.34889	8.71382	8.48162e-09	4.17032e-07	10.2016	PREDICTED: uncharacterized protein LOC101496961 n_1 Tax_Cicer arietinum RepID_UPI00032ABC2E	AT2G31840.1	Thioredoxin superfamily protein	Medtr1g115235.3	thioredoxin superfamily protein%2C putative
Ca12314	Ca4	17294337	17299462	1.45746	3.89897	7.13881	2.6195e-07	4.14776e-06	6.77667	Elongator complex protein 1 n_4 Tax_Papilionoideae RepID_A0A072VSS4_MEDTR	AT5G13680.1	IKI3 family protein	Medtr1g115300.2	elongator complex protein
Ca12317	Ca4	17349641	17351512	-0.863433	7.77079	-6.70508	7.13348e-07	8.47759e-06	5.707	PREDICTED: photosynthetic NDH subunit of lumenal location 1 - chloroplastic n_1 Tax_Cicer arietinum RepID_UPI00032A607B	AT2G39470.1	PsbP-like protein 2	Medtr1g115410.1	photosystem II reaction center PsbP family protein
Ca12330	Ca4	17428093	17432530	0.753007	4.90755	5.02962	4.16033e-05	0.000212888	1.63664	Uncharacterized protein n_9 Tax_Papilionoideae RepID_I1NJ61_SOYBN	AT3G55200.1	Cleavage and polyadenylation specificity	Medtr1g115525.1	splicing factor 3B subunit-like protein
Ca12328	Ca4	17449120	17450755	0.871124	6.4179	6.24072	2.13911e-06	2.01961e-05	4.60928	Uncharacterized protein n_8 Tax_Spermatophyta RepID_A0A0S3SL58_PHAAN	AT2G39390.1	Ribosomal L29 family protein	Medtr1g115545.1	60S ribosomal L35-like protein
Ca12338	Ca4	17451629	17454143	-0.567609	2.82434	-5.80264	6.16316e-06	4.61846e-05	3.72117	Pectate lyase n_3 Tax_Papilionoideae RepID_A0A072VR83_MEDTR	AT3G55140.2	Pectin lyase-like superfamily protein	Medtr1g115550.1	pectate lyase family protein
Ca12344	Ca4	17532912	17556066	-1.93131	3.41209	-8.23451	2.32637e-08	8.3135e-07	9.25028	PREDICTED: uncharacterized protein LOC106771799 n_1 Tax_Vigna radiata var. radiata RepID_UPI0007118821	AT5G66230.2	Chalcone-flavanone isomerase family	Medtr1g115820.1	chalcone-flavanone isomerase family protein
Ca12364	Ca4	17870757	17873998	-0.991563	0.728057	-5.62688	9.47395e-06	6.44304e-05	3.59382	PREDICTED: myosin-10 n_1 Tax_Cicer arietinum RepID_UPI00032ACF20	AT3G55060.1	unknown protein; BEST Arabidopsis thaliana	Medtr1g116070.1	ATP-binding protein%2C putative
Ca12383	Ca4	17978042	17980645	0.539289	3.76308	7.19946	2.28145e-07	3.79292e-06	6.91799	PREDICTED: CDP-diacylglycerol--glycerol-3-phosphate 3-phosphatidyltransferase 2-like n_1 Tax_Cicer arietinum RepID_UPI00032A7EE5			#N/A	#N/A
Ca12392	Ca4	18221019	18227049	1.13953	4.25194	7.35842	1.59195e-07	2.98027e-06	7.2509	PREDICTED: nucleolar complex protein 2 homolog n_1 Tax_Cicer arietinum RepID_UPI00032ABD10	AT2G18220.1	Noc2p family	Medtr1g110560.1	nucleolar complex-like protein
Ca12400	Ca4	18279808	18283593	0.477559	2.19952	4.65469	0.000106396	0.000461392	1.01949	PREDICTED: gem-associated protein 2-like n_1 Tax_Cicer arietinum RepID_UPI00032A740E	AT1G54380.1	spliceosome protein-related	Medtr1g116530.1	survival motor neuron interacting protein
Ca12399	Ca4	18292014	18298742	0.52296	5.48015	4.93413	5.28163e-05	0.000259334	1.39236	Uncharacterized protein n_8 Tax_Papilionoideae RepID_A0A0S3SL71_PHAAN	AT2G43240.1	Nucleotide-sugar transporter family	Medtr1g116565.1	UDP-galactose transporter
Ca12410	Ca4	18311568	18315189	0.590159	5.05743	5.0908	3.57132e-05	0.000188038	1.78417	PREDICTED: uncharacterized protein LOC101495445 n_1 Tax_Cicer arietinum RepID_UPI00032A8344	AT1G05870.4	Protein of unknown function (DUF1685)	Medtr1g116590.3	DUF1685 family protein
Ca12424	Ca4	18492014	18502631	1.32137	3.99553	5.87232	5.20151e-06	4.05903e-05	3.78131	PREDICTED: importin beta-like SAD2 n_1 Tax_Cicer arietinum RepID_UPI00032A72A8	AT3G59020.1	ARM repeat superfamily protein	Medtr1g116957.1	importin-like protein
Ca12439	Ca4	18693631	18695129	-2.31029	2.46485	-11.7742	2.65908e-11	1.07578e-08	15.9809	PREDICTED: E3 ubiquitin-protein ligase SGR9 - amyloplastic-like n_1 Tax_Cicer arietinum RepID_UPI00032A7647			Medtr1g067260.1	hypothetical protein
Ca12444	Ca4	18804905	18809533	-0.594277	6.12391	-5.15134	3.07123e-05	0.000166403	1.93745	PREDICTED: uncharacterized protein LOC101511020 n_1 Tax_Cicer arietinum RepID_UPI00032A51DC	AT5G12130.1	integral membrane TerC	Medtr1g067200.1	integral membrane protein%2C TerC family protein
Ca12445	Ca4	18819150	18821630	2.45611	4.90215	8.43864	1.50812e-08	6.08621e-07	9.61724	PREDICTED: glutathione S-transferase L3-like n_1 Tax_Cicer arietinum RepID_UPI00032ABB0B	AT5G02790.1	Glutathione S-transferase family	Medtr1g067180.4	glutathione S-transferase tau
Ca12443	Ca4	18825388	18836848	-1.11314	1.78875	-7.66377	8.0497e-08	1.83931e-06	8.15199	PREDICTED: ecotropic viral integration site 5 protein homolog isoform X3 n_3 Tax_Cicer arietinum RepID_UPI00032A5BED	AT2G37290.1	Ypt/Rab-GAP domain of gyp1p superfamily	Medtr1g067150.1	RabGAP/TBC domain protein
Ca12464	Ca4	19046772	19048318	1.46044	6.5698	9.31303	2.50659e-09	1.94643e-07	11.4136	Uncharacterized protein n_8 Tax_Papilionoideae RepID_V7BG17_PHAVU	AT5G02960.1	Ribosomal protein S12/S23 family protein	Medtr1g066860.1	40S ribosomal protein S23-1
Ca12461	Ca4	19082245	19085952	0.447476	3.77525	5.16992	2.93246e-05	0.000160472	2.0452	PREDICTED: lipid phosphate phosphatase gamma - chloroplastic n_1 Tax_Cicer arietinum RepID_UPI00032ACD17	AT5G03080.1	Phosphatidic acid phosphatase (PAP2)	Medtr1g066770.1	phosphatidic acid phosphatase (PAP2) family protein
Ca12471	Ca4	19207783	19209799	1.8676	2.40724	9.34571	2.34849e-09	1.92592e-07	11.6017	PREDICTED: zinc finger protein JACKDAW-like n_1 Tax_Cicer arietinum RepID_UPI00032AA379	AT3G50700.1	indeterminate(ID)-domain	Medtr8g017210.1	C2H2-like zinc finger protein%2C putative
Ca12482	Ca4	19425901	19428526	0.57084	3.54266	6.44005	1.33091e-06	1.38196e-05	5.16551	PREDICTED: auxin response factor 18-like n_1 Tax_Cicer arietinum RepID_UPI00032A5F4B	AT4G30080.1	auxin response factor 16	Medtr1g064430.2	auxin response factor 1
Ca12485	Ca4	19508337	19512852	1.74018	1.54509	6.18353	2.45316e-06	2.23873e-05	4.85049	Cytokinin riboside 5'-monophosphate phosphoribohydrolase n_26 Tax_Pentapetalae RepID_C6TA03_SOYBN	AT2G37210.1	lysine decarboxylase family protein	Medtr1g064260.2	cytokinin riboside 5'-monophosphate phosphoribohydrolase
Ca12487	Ca4	19527049	19529442	1.2647	9.3111	8.96537	5.05564e-09	3.0088e-07	10.6639	PREDICTED: 29 kDa ribonucleoprotein A - chloroplastic n_1 Tax_Cicer arietinum RepID_UPI00032AA8E8	AT2G37220.1	RNA-binding (RRM/RBD/RNP motifs) family	Medtr1g064230.1	RNA-binding (RRM/RBD/RNP motif) family protein
Ca12489	Ca4	19610002	19613751	2.44514	8.16011	9.2107	3.07656e-09	2.21962e-07	11.1925	Phenylalanine ammonia-lyase n_13 Tax_Papilionoideae RepID_A5YMH3_ASTPN	AT2G37040.1	PHE ammonia lyase 1	Medtr1g064090.1	phenylalanine ammonia-lyase-like protein
Ca12501	Ca4	19689942	19708892	1.54535	0.746537	4.53413	0.000144011	0.000590682	1.01055	PREDICTED: putative white-brown complex homolog protein 30 isoform X1 n_3 Tax_Cicer arietinum RepID_UPI00032AA27F	AT2G37010.1	non-intrinsic ABC protein	Medtr1g063920.1	white-brown-complex ABC transporter family protein%2C putative
Ca12502	Ca4	19774202	19778440	0.708541	7.5191	5.15607	3.03533e-05	0.000164922	1.94176	Cell division cycle protein 48 homolog n_110 Tax_Spermatophyta RepID_CDC48_SOYBN	AT5G03340.1	ATPase, AAA-type, CDC48 protein	Medtr1g063380.1	ATPase%2C AAA-type%2C CDC48 protein
Ca12508	Ca4	19802603	19805067	-0.828538	5.76646	-6.21902	2.25315e-06	2.09495e-05	4.5543	PREDICTED: thylakoid lumenal 15.0 kDa protein 2 - chloroplastic n_1 Tax_Cicer arietinum RepID_UPI00032AD0E8	AT5G52970.1	thylakoid lumen 15.0 kDa protein	Medtr1g063350.1	thylakoid lumenal 15.0 kDa protein
Ca12516	Ca4	19935650	19951238	1.21564	2.62441	5.08892	3.58816e-05	0.000188789	2.02657	Suppressor of auxin resistance 1 protein n_4 Tax_Papilionoideae RepID_A0A072VJG2_MEDTR	AT2G38940.1	phosphate transporter	Medtr1g063180.2	suppressor of auxin resistance 1 protein
Ca12522	Ca4	20029125	20031937	-1.30833	5.78268	-9.07617	4.03583e-09	2.60259e-07	10.9329	PREDICTED: uncharacterized protein LOC101514684 n_1 Tax_Cicer arietinum RepID_UPI00032A82FE	AT2G36895.2	unknown protein; FUNCTIONS IN: molecular_function	Medtr1g063100.1	hypothetical protein
Ca12523	Ca4	20036169	20041207	0.78543	2.62313	6.49919	1.15717e-06	1.25081e-05	5.43577	Exosome complex exonuclease RRP41 n_3 Tax_Papilionoideae RepID_G7IP72_MEDTR	AT3G60500.3	3'-5'-exoribonuclease family protein	Medtr1g063090.1	exosome complex exonuclease RRP41
Ca12567	Ca4	21034193	21040552	0.63236	7.10018	7.139	2.61839e-07	4.14776e-06	6.72359	Pyruvate kinase n_24 Tax_Papilionoideae RepID_I1LZE1_SOYBN	AT3G52990.1	Pyruvate kinase family protein	Medtr7g103420.1	pyruvate kinase family protein
Ca12584	Ca4	21350638	21353609	-0.80621	4.71387	-5.6807	8.30285e-06	5.79079e-05	3.24803	PREDICTED: fructose-bisphosphate aldolase - cytoplasmic isozyme-like n_1 Tax_Cicer arietinum RepID_UPI00032AA596	AT2G36460.1	Aldolase superfamily protein	Medtr1g061050.1	fructose-bisphosphate aldolase
Ca12595	Ca4	21453632	21456047	-0.578093	5.04556	-5.99824	3.83293e-06	3.18439e-05	4.01891	PREDICTED: uncharacterized protein LOC101488415 n_1 Tax_Cicer arietinum RepID_UPI00032AC8CB	AT3G09970.1	Calcineurin-like metallo-phosphoesterase	Medtr1g060850.1	calcineurin-like metallo-phosphoesterase superfamily protein
Ca12594	Ca4	21457956	21461787	-0.625012	3.40213	-4.78385	7.69498e-05	0.00035365	1.1315	PREDICTED: serine/threonine-protein kinase D6PKL1 n_1 Tax_Cicer arietinum RepID_UPI00032AA3EF	AT3G52890.2	KCBP-interacting protein kinase	Medtr1g060790.1	Serine/Threonine-kinase KIPK-like protein
Ca12598	Ca4	21522151	21526117	0.562751	8.81315	5.66839	8.5569e-06	5.92744e-05	3.17768	Monodehydroascorbate reductase n_5 Tax_Papilionoideae RepID_MDAR_PEA	AT5G03630.1	Pyridine nucleotide-disulphide	Medtr1g060620.1	pyridine nucleotide-disulfide oxidoreductase
Ca12599	Ca4	21536117	21541396	0.986128	5.17043	4.81068	7.19449e-05	0.000334874	1.08723	PREDICTED: 60S acidic ribosomal protein P2-4-like n_1 Tax_Cicer arietinum RepID_UPI00032A71E1	AT4G17260.1	Lactate/malate dehydrogenase family	Medtr4g101130.1	L-lactate dehydrogenase A-like protein
Ca12597	Ca4	21564069	21567955	0.712299	5.05809	6.31611	1.78673e-06	1.74509e-05	4.78788	PREDICTED: uncharacterized protein LOC101489949 n_1 Tax_Cicer arietinum RepID_UPI00032A8059	AT3G52870.1	IQ calmodulin-binding motif family	Medtr1g060590.1	calmodulin-binding family protein
Ca12625	Ca4	22002464	22004028	-1.0313	3.06636	-7.05412	3.17952e-07	4.78348e-06	6.65884	PREDICTED: D-tyrosyl-tRNA(Tyr) deacylase n_1 Tax_Cicer arietinum RepID_UPI00032AD131	AT4G18460.1	D-Tyr-tRNA(Tyr) deacylase family protein	Medtr2g036040.1	D-tyrosyl-tRNA(Tyr) deacylase
Ca12648	Ca4	22370643	22407560	-0.623722	3.31889	-6.04225	3.44633e-06	2.93494e-05	4.23382	PREDICTED: UPF0505 protein C16orf62 homolog n_1 Tax_Cicer arietinum RepID_UPI00032A5038	AT4G23160.1	cysteine-rich RLK (RECEPTOR-like	Medtr3g093120.1	SPFH domain/band 7 family protein
Ca12673	Ca4	22727780	22731912	0.974291	4.83953	7.35899	1.58991e-07	2.98011e-06	7.23202	PREDICTED: ribosome biogenesis protein NSA2 homolog n_2 Tax_Cicer arietinum RepID_UPI00032A7E73	AT5G06360.1	Ribosomal protein S8e family protein	Medtr3g088865.1	ribosomal protein S8e family protein
Ca12689	Ca4	23092242	23099148	0.858473	5.10141	5.48568	1.34094e-05	8.45065e-05	2.76468	PREDICTED: histidine--tRNA ligase n_1 Tax_Cicer arietinum RepID_UPI00032A7A59	AT3G02760.1	Class II aaRS and biotin synthetases	Medtr1g057860.1	histidyl-tRNA synthetase
Ca12696	Ca4	23218176	23221504	-0.349853	6.68965	-4.80025	7.385e-05	0.000342076	1.06402	Ubiquitin conjugating enzyme/ubiquitin-like activating enzyme n_2 Tax_Phaseolus vulgaris RepID_U5U2R1_PHAVU	AT3G52560.4	ubiquitin E2 variant 1D-4	Medtr1g058100.4	ubiquitin-conjugating enzyme
Ca12717	Ca4	23750782	23764146	0.601375	3.29632	4.90169	5.72821e-05	0.000277784	1.43843	PREDICTED: uncharacterized protein LOC101500533 n_1 Tax_Cicer arietinum RepID_UPI00032A7831	AT1G35660.1	unknown protein; FUNCTIONS IN: molecular_function	Medtr1g050670.2	erythroid differentiation-related factor 1%2C putative
Ca12723	Ca4	23832084	23842008	0.685064	5.70797	8.83218	6.64213e-09	3.60954e-07	10.4297	Kinase and PP2C-like domain protein n_2 Tax_Papilionoideae RepID_G7I7C7_MEDTR	AT2G40860.1	protein kinase family protein / protein	Medtr1g050520.1	kinase and PP2C-like domain protein
Ca12743	Ca4	23888511	23890384	0.986986	1.55235	5.05649	3.89046e-05	0.000201029	2.1473	PREDICTED: pentatricopeptide repeat-containing protein At1g80270 - mitochondrial-like n_1 Tax_Cicer arietinum RepID_UPI0006415E99	AT1G80270.3	PENTATRICOPEPTIDE REPEAT 596	Medtr1g050750.1	DNA-binding protein
Ca12741	Ca4	23914322	23917648	1.47438	2.25815	5.94269	4.38472e-06	3.56915e-05	4.18427	PREDICTED: pentatricopeptide repeat-containing protein At1g80270 - mitochondrial-like n_1 Tax_Cicer arietinum RepID_UPI0006415E99	AT1G80270.3	PENTATRICOPEPTIDE REPEAT 596	Medtr1g050750.1	DNA-binding protein
Ca12794	Ca4	24561229	24565675	0.614385	2.92836	6.10219	2.98267e-06	2.62334e-05	4.43443	PREDICTED: xylosyltransferase 2 n_1 Tax_Cicer arietinum RepID_UPI00032AC62B	AT3G24040.1	Core-2/I-branching beta-1,6-N-acetylglucosaminyltransferase	Medtr1g046740.1	core-2/I-branching enzyme
Ca12795	Ca4	24567414	24575152	1.02965	6.16706	12.0202	1.75232e-11	7.97413e-09	16.3977	GDT1-like protein n_2 Tax_Papilionoideae RepID_A0A072VSW1_MEDTR	AT4G13590.1	Uncharacterized protein family (UPF0016)	Medtr1g046730.1	GDT1-like protein
Ca12805	Ca4	24713928	24726664	-0.636104	8.80881	-5.39444	1.67985e-05	0.000101515	2.50245	ABC1/COQ8 Serine/Threonine kinase n_2 Tax_Papilionoideae RepID_A0A072VGN0_MEDTR	AT3G24190.1	Protein kinase superfamily protein	Medtr1g046620.1	ABC1/COQ8 Serine/Threonine kinase
Ca12812	Ca4	24823200	24827569	0.650119	6.35861	6.34081	1.68462e-06	1.67205e-05	4.84986	3-ketoacyl-CoA thiolase 2 - peroxisomal-like protein n_5 Tax_Papilionoideae RepID_A0A072VIH3_MEDTR	AT2G33150.1	peroxisomal 3-ketoacyl-CoA	Medtr1g047210.1	3-ketoacyl-CoA thiolase 2%2C peroxisomal-like protein
Ca12839	Ca4	25358236	25365359	0.532228	5.43338	5.77952	6.52069e-06	4.83207e-05	3.48512	PREDICTED: putative G3BP-like protein n_1 Tax_Cicer arietinum RepID_UPI00032ABCC0			Medtr1g045800.1	Ras-GTPase-activating protein-binding protein
Ca12854	Ca4	25497422	25503305	-0.541233	4.20295	-5.52089	1.22948e-05	7.88696e-05	2.87833	PREDICTED: serine/threonine-protein kinase Nek4-like n_1 Tax_Cicer arietinum RepID_UPI00032A6704	AT1G54510.3	NIMA-related serine/threonine kinase	Medtr7g095450.1	Serine/Threonine-kinase Nek4
Ca12861	Ca4	25735387	25737548	1.70255	6.29337	7.87966	5.00772e-08	1.3367e-06	8.39269	60S ribosomal L4-like protein n_7 Tax_Papilionoideae RepID_G7I6N5_MEDTR	AT3G09630.1	Ribosomal protein L4/L1 family	Medtr1g045410.1	60S ribosomal L4-like protein
Ca12862	Ca4	25754548	25757027	1.4099	6.56771	8.54336	1.21005e-08	5.2233e-07	9.82605	40S ribosomal S3-like protein n_14 Tax_fabids RepID_B7FH64_MEDTR	AT2G31610.1	Ribosomal protein S3 family protein	Medtr6g052140.1	40S ribosomal S3-like protein
Ca12868	Ca4	25871321	25879867	0.962909	5.17636	8.22664	2.36582e-08	8.35688e-07	9.14858	PREDICTED: pre-mRNA-processing factor 19 homolog 2 n_1 Tax_Cicer arietinum RepID_UPI00032A9D49	AT2G33340.3	MOS4-associated complex 3B	Medtr1g044720.1	Pre-mRNA-processing factor
Ca12895	Ca4	26205886	26207662	-0.584029	8.41393	-6.54542	1.03759e-06	1.14254e-05	5.31499	Proton gradient regulation protein n_11 Tax_Papilionoideae RepID_G7I6M5_MEDTR	AT2G05620.1	proton gradient regulation 5	Medtr1g045140.1	proton gradient regulation protein
Ca12892	Ca4	26214627	26215502	1.10895	3.45235	5.83686	5.67014e-06	4.33841e-05	3.72963	PREDICTED: uncharacterized protein LOC101491036 n_1 Tax_Cicer arietinum RepID_UPI00032A961A			Medtr1g045060.1	transmembrane protein%2C putative
Ca12921	Ca4	26812303	26815633	-0.453962	4.5887	-5.4484	1.47016e-05	9.12955e-05	2.67909	PREDICTED: transcription factor bHLH104-like n_1 Tax_Cicer arietinum RepID_UPI00032AA0ED	AT4G14410.2	basic helix-loop-helix (bHLH)	Medtr1g043430.1	BHLH domain class transcription factor
Ca12928	Ca4	27081334	27086120	-1.55601	1.09462	-7.82736	5.61475e-08	1.43129e-06	8.49104	PREDICTED: uncharacterized protein LOC101498608 n_1 Tax_Cicer arietinum RepID_UPI00032A5CF7			Medtr1g042820.1	DUF761 domain protein
Ca12942	Ca4	27356433	27357911	0.619934	7.26188	6.47333	1.23009e-06	1.30927e-05	5.16325	Uncharacterized protein n_3 Tax_Pentapetalae RepID_A0A0J8C660_BETVU	AT5G08530.1	51 kDa subunit of complex I	Medtr1g042300.2	NADH-ubiquinone oxidoreductase 51 kDa subunit
Ca12945	Ca4	27421878	27427957	-0.461081	5.59172	-6.86345	4.93449e-07	6.61464e-06	6.08258	Casein kinase I-like protein n_2 Tax_Papilionoideae RepID_G7I3R5_MEDTR	AT3G23340.1	casein kinase I-like 10	Medtr1g042280.2	casein kinase I-like protein
Ca12955	Ca4	27646054	27650186	-0.607715	6.63142	-7.27813	1.9085e-07	3.33941e-06	7.04501	PREDICTED: aldo-keto reductase n_1 Tax_Cicer arietinum RepID_UPI00032A6A49	AT1G04420.1	NAD(P)-linked oxidoreductase superfamily	Medtr1g042730.1	aldo/keto reductase family oxidoreductase
Ca12982	Ca4	28153997	28155981	-0.988301	3.54212	-6.74352	6.52112e-07	7.99844e-06	5.88149	PREDICTED: activator of 90 kDa heat shock protein ATPase homolog 1-like n_1 Tax_Cicer arietinum RepID_UPI00032A8AAD	AT3G12050.1	Aha1 domain-containing protein	Medtr0136s0060.1	activator of 90 kDa heat shock ATPase-like protein
Ca13017	Ca4	28600082	28604292	-0.616478	3.10182	-5.08873	3.5898e-05	0.00018881	1.92444	PREDICTED: probable protein phosphatase 2C 25 n_1 Tax_Cicer arietinum RepID_UPI00032A7007	AT5G06750.2	Protein phosphatase 2C family protein	Medtr0015s0140.2	serine/threonine phosphatase family%2C 2C domain protein
Ca13018	Ca4	28644531	28650193	-0.475458	7.03017	-6.81965	5.46222e-07	7.0621e-06	5.98301	PREDICTED: probable plastid-lipid-associated protein 13 - chloroplastic n_1 Tax_Cicer arietinum RepID_UPI00032A90B3	AT2G42130.1	Plastid-lipid associated protein PAP	Medtr1g054070.2	plastid lipid-associated protein
Ca13024	Ca4	28823175	28824002	-0.740128	4.15599	-6.85635	5.01632e-07	6.68915e-06	6.09328	PREDICTED: uncharacterized protein LOC101509942 n_1 Tax_Cicer arietinum RepID_UPI00032A7685	AT3G57990.1	unknown protein; Has 1497 Blast hits	Medtr1g053910.1	hypothetical protein
Ca13055	Ca4	29412224	29414620	-0.665597	3.2005	-4.84437	6.61218e-05	0.000311947	1.3045	PREDICTED: protein QUIRKY-like n_1 Tax_Cicer arietinum RepID_UPI00032A8A6F	AT5G06850.1	C2 calcium/lipid-binding plant phosphoribosyltransferase	Medtr0291s0010.1	calcium-dependent lipid-binding (CaLB domain) family protein
Ca13071	Ca4	29651956	29656953	-1.20369	4.61458	-6.04693	3.40762e-06	2.91154e-05	4.1458	PREDICTED: OTU domain-containing protein At3g57810-like n_1 Tax_Cicer arietinum RepID_UPI00032ABB20	AT3G57810.3	Cysteine proteinases superfamily protein	Medtr1g052405.2	OTU-like cysteine protease
Ca13073	Ca4	29732023	29737572	-1.00949	5.09138	-5.2224	2.57363e-05	0.000144772	2.11082	PREDICTED: transcription factor bHLH48-like n_1 Tax_Cicer arietinum RepID_UPI00032A849D			Medtr1g059270.2	transcription factor
Ca13121	Ca4	30417222	30423471	-1.04144	3.58547	-8.8859	5.94804e-09	3.35702e-07	10.5946	Auxin canalization protein n_5 Tax_Papilionoideae RepID_A0A072VHY8_MEDTR	AT3G22810.1	Plant protein of unknown function (DUF828)	Medtr1g041395.2	auxin canalisation protein
Ca13137	Ca4	30618885	30622701	-0.503133	7.04793	-7.14329	2.59286e-07	4.12243e-06	6.73405	PREDICTED: uncharacterized protein LOC101501809 n_1 Tax_Cicer arietinum RepID_UPI00032A746B	AT3G55760.3	unknown protein; EXPRESSED IN: 16 plant	Medtr1g041275.1	hypothetical protein
Ca13143	Ca4	30751344	30753306	-0.758843	4.99285	-6.00623	3.75955e-06	3.13877e-05	4.03923	PREDICTED: uncharacterized protein LOC101505674 n_1 Tax_Cicer arietinum RepID_UPI00032AC53D	AT3G22970.1	Protein of unknown function (DUF506)	Medtr1g041155.1	DUF506 family protein
Ca13151	Ca4	30822000	30825667	-1.14893	6.69642	-4.87163	6.17584e-05	0.00029537	1.24097	PREDICTED: 3-ketoacyl-CoA synthase 11-like n_1 Tax_Cicer arietinum RepID_UPI00032AB7E6	AT2G26640.1	3-ketoacyl-CoA synthase 11	Medtr1g041085.1	3-ketoacyl-CoA synthase-like protein
Ca13161	Ca4	30922778	30924082	-1.20823	3.91011	-5.60847	9.91194e-06	6.65218e-05	3.11591	PREDICTED: CBL-interacting serine/threonine-protein kinase 4-like n_1 Tax_Cicer arietinum RepID_UPI00032A6A83	AT4G14580.1	CBL-interacting protein	Medtr1g040875.1	CBL-interacting kinase
Ca13166	Ca4	30981328	30989442	-0.471615	6.9709	-5.75942	6.84874e-06	5.01204e-05	3.43968	PREDICTED: acylamino-acid-releasing enzyme isoform X1 n_4 Tax_Cicer arietinum RepID_UPI00032AB215	AT4G14570.1	acylaminoacyl-peptidase-related	Medtr5g042400.2	acylamino-acid-releasing enzyme-like protein%2C putative
Ca13163	Ca4	31054825	31061604	2.12791	0.366676	5.29135	2.16861e-05	0.000125416	2.82137	PREDICTED: lysM domain receptor-like kinase 4 n_1 Tax_Cicer arietinum RepID_UPI00032A89FA	AT2G33580.1	Protein kinase superfamily protein	Medtr5g042440.1	LysM-domain receptor-like kinase
Ca13215	Ca4	31901795	31917408	-0.371154	5.92067	-5.28067	2.22686e-05	0.000128222	2.25717	PREDICTED: DNA helicase INO80-like isoform X2 n_1 Tax_Cicer arietinum RepID_UPI00032AC887	AT3G57300.2	INO80 ortholog	Medtr7g090960.1	DNA helicase INO80-like protein
Ca13254	Ca4	32735036	32735675	-1.59988	4.72203	-4.99762	4.50645e-05	0.00022703	1.60084	PREDICTED: ethylene-responsive transcription factor ERF107-like n_1 Tax_Cicer arietinum RepID_UPI00032A508A	AT5G47230.1	ethylene responsive	Medtr1g040430.1	ethylene response factor
Ca13268	Ca4	32791834	32793566	0.751802	6.32563	5.928	4.54365e-06	3.65555e-05	3.85196	PREDICTED: 60S ribosomal protein L24-like n_1 Tax_Cicer arietinum RepID_UPI00032A921B	AT3G53020.1	Ribosomal protein	Medtr1g061670.1	60S ribosomal protein L24-2
Ca13265	Ca4	32840801	32845759	0.493862	4.73197	4.88832	5.92304e-05	0.000285692	1.29035	PREDICTED: uncharacterized protein LOC101513695 n_1 Tax_Cicer arietinum RepID_UPI00032A5E58	AT5G08540.1	unknown protein; FUNCTIONS IN: molecular_function	Medtr1g039490.2	transmembrane protein%2C putative
Ca13274	Ca4	32921451	32922513	-1.85756	0.863935	-4.55958	0.000135094	0.000561486	1.04736	Cytochrome f n_902 Tax_Spermatophyta RepID_CYF_PEA	ATCG00540.1	photosynthetic electron transfer	Medtr0002s0690.1	apocytochrome protein F
Ca13283	Ca4	33062607	33064241	1.58962	2.75317	8.49352	1.34352e-08	5.59924e-07	9.85598	PREDICTED: protein ASPARTIC PROTEASE IN GUARD CELL 2 n_1 Tax_Cicer arietinum RepID_UPI00032AAE37	AT3G20015.1	Eukaryotic aspartyl protease family	Medtr1g039270.1	aspartic protease in GUARD CELL-like protein
Ca13288	Ca4	33186248	33196347	0.506502	5.18254	5.70996	7.72881e-06	5.47976e-05	3.31544	P-loop nucleoside triphosphate hydrolase superfamily protein n_4 Tax_Papilionoideae RepID_A0A072VS66_MEDTR	AT2G38770.1	P-loop containing nucleoside	Medtr1g038815.1	P-loop nucleoside triphosphate hydrolase superfamily protein
Ca13295	Ca4	33304461	33309300	0.609256	4.32112	5.13842	3.17171e-05	0.000170754	1.92643	Microtubule associated protein - MAP65/ASE1 family protein n_4 Tax_Papilionoideae RepID_G7IBG9_MEDTR	AT2G01910.2	Microtubule associated	Medtr1g038840.2	microtubule associated protein%2C MAP65/ASE1 family protein
Ca13314	Ca4	33668654	33675102	-2.05258	3.59648	-6.98338	3.74057e-07	5.42809e-06	6.45056	PREDICTED: abscisic acid 8''''-hydroxylase 2-like - partial n_1 Tax_Cicer arietinum RepID_UPI00032A4E90	AT2G29090.2	cytochrome P450, family 707,	Medtr1g037580.1	cytochrome P450 family ABA 8'-hydroxylase
Ca13326	Ca4	33827518	33846004	-0.398287	3.55612	-5.4478	1.47233e-05	9.13934e-05	2.75271	PREDICTED: uncharacterized protein LOC101510901 isoform X1 n_2 Tax_Cicer arietinum RepID_UPI00032A4FC1	AT1G19485.2	Transducin/WD40 repeat-like superfamily	Medtr1g060580.1	transducin/WD40 repeat protein
Ca13354	Ca4	34086658	34089992	-0.680004	3.2547	-6.58443	9.46559e-07	1.05895e-05	5.53543	PREDICTED: tobamovirus multiplication protein 3-like n_1 Tax_Cicer arietinum RepID_UPI00032AD2D6			#N/A	#N/A
Ca13376	Ca4	34358152	34366889	-0.887403	3.14562	-5.72807	7.39395e-06	5.29697e-05	3.49376	Pyridine nucleotide-disulfide oxidoreductase domain protein n_3 Tax_Papilionoideae RepID_A0A072VG58_MEDTR	AT5G49555.1	FAD/NAD(P)-binding oxidoreductase family	Medtr1g034450.1	pyridine nucleotide-disulfide oxidoreductase domain protein
Ca13392	Ca4	34497839	34499490	-0.760337	4.48659	-7.83406	5.53297e-08	1.42035e-06	8.30009	Splicing factor U2af small subunit A-like protein n_3 Tax_Papilionoideae RepID_G7IA30_MEDTR	AT5G42820.1	Zinc finger C-x8-C-x5-C-x3-H	Medtr1g035130.6	splicing factor U2af small subunit A-like protein
Ca13397	Ca4	34666748	34678386	0.725834	3.71683	5.56339	1.10733e-05	7.21628e-05	3.02565	ATP-dependent helicase family protein n_2 Tax_Papilionoideae RepID_A0A072VG70_MEDTR	AT2G02090.1	SNF2 domain-containing	Medtr1g035330.1	ATP-dependent helicase family protein
Ca13410	Ca4	34857752	34863074	-0.964854	4.18136	-5.06623	3.79704e-05	0.000197256	1.75783	PREDICTED: CRAL-TRIO domain-containing protein YKL091C isoform X1 n_2 Tax_Cicer arietinum RepID_UPI00032A6191	AT1G14820.1	Sec14p-like phosphatidylinositol transfer	Medtr1g032580.1	Sec14p-like phosphatidylinositol transfer family protein
Ca13441	Ca4	34972031	34974087	0.661991	5.98415	5.94858	4.32251e-06	3.53438e-05	3.90074	Uncharacterized protein n_22 Tax_Mesangiospermae RepID_I1LGB1_SOYBN	AT3G57490.1	Ribosomal protein S5 family protein	Medtr8g105340.2	40S ribosomal protein S2-4
Ca13445	Ca4	35008428	35012146	0.986012	2.50183	8.92407	5.50068e-09	3.22348e-07	10.7559	PREDICTED: probable UDP-3-O-[3-hydroxymyristoyl] N-acetylglucosamine deacetylase 2 n_1 Tax_Cicer arietinum RepID_UPI00032A9F9D	AT1G24793.2	UDP-3-O-acyl N-acetylglycosamine deacetylase	Medtr1g032430.2	UDP-3-O-[3-hydroxymyristoyl] N-acetylglucosamine deacetylase
Ca13449	Ca4	35037398	35041245	1.3422	3.67102	4.85614	6.42017e-05	0.000305117	1.28571	PREDICTED: ankyrin repeat-containing protein At2g01680-like n_1 Tax_Cicer arietinum RepID_UPI00032A734D	AT2G01680.1	Ankyrin repeat family protein	Medtr1g032100.1	ankyrin repeat plant-like protein
Ca13437	Ca4	35111835	35115000	2.06447	5.44237	4.87498	6.12426e-05	0.00029327	1.24852	PREDICTED: 1-aminocyclopropane-1-carboxylate oxidase homolog 4-like n_1 Tax_Cicer arietinum RepID_UPI00032A963C	AT1G06650.1	2-oxoglutarate (2OG) and Fe(II)-dependent	Medtr1g032140.1	1-aminocyclopropane-1-carboxylate oxidase-like protein
Ca13447	Ca4	35273565	35277086	-1.50578	1.24368	-7.78246	6.19609e-08	1.531e-06	8.40845	PREDICTED: dynein light chain 2 - cytoplasmic n_1 Tax_Cicer arietinum RepID_UPI00032A8C40	AT1G23220.1	Dynein light chain type 1 family protein	Medtr8g104900.1	dynein light chain type 1 family protein
Ca13430	Ca4	35296550	35305338	2.11631	1.13487	6.36274	1.59898e-06	1.60897e-05	5.28625	PREDICTED: uncharacterized protein LOC101492873 n_1 Tax_Cicer arietinum RepID_UPI00032AC66C	AT1G12280.1	LRR and NB-ARC domains-containing disease	Medtr1g031830.1	NBS-LRR type disease resistance protein
Ca13434	Ca4	35383116	35384519	1.39372	3.81608	7.57694	9.75995e-08	2.12043e-06	7.77495	PREDICTED: uncharacterized protein At4g22758 n_1 Tax_Cicer arietinum RepID_UPI00032AA61E	AT1G70780.1	unknown protein; FUNCTIONS IN: molecular_function	Medtr1g031680.1	senescence-associated protein%2C putative
Ca13454	Ca4	35408635	35412511	-0.98412	4.67887	-7.45765	1.27381e-07	2.56188e-06	7.45439	Uncharacterized protein n_2 Tax_Papilionoideae RepID_B7FHH9_MEDTR	AT1G23110.4	unknown protein; FUNCTIONS IN: molecular_function	Medtr1g031620.3	hypothetical protein
Ca13455	Ca4	35426405	35436457	-1.14732	3.811	-10.2126	4.37989e-10	6.03517e-08	13.1991	Uncharacterized protein n_10 Tax_Brassicaceae RepID_M4EBL5_BRARP	AT2G01480.1	O-fucosyltransferase family protein	Medtr1g031590.1	O-fucosyltransferase family protein
Ca13461	Ca4	35513979	35519191	-1.02087	6.66334	-5.74852	7.03348e-06	5.12272e-05	3.41329	Auxin efflux carrier component n_5 Tax_Papilionoideae RepID_Q769J4_PEA	AT1G70940.1	Auxin efflux carrier family	Medtr1g030890.1	auxin efflux carrier family transporter
Ca13467	Ca4	35636842	35643911	-0.731098	5.61305	-6.75967	6.28024e-07	7.75898e-06	5.83955	PREDICTED: nicotinate-nucleotide pyrophosphorylase [carboxylating] - chloroplastic isoform X1 n_1 Tax_Cicer arietinum RepID_UPI00032A9DAC	AT2G01350.2	quinolinate phoshoribosyltransferase	Medtr1g030750.1	quinolinate phosphoribosyltransferase%2C putative
Ca13473	Ca4	35661262	35667371	1.46782	3.79877	8.18785	2.57066e-08	8.7764e-07	9.12175	Uncharacterized protein n_13 Tax_Papilionoideae RepID_I1MNU1_SOYBN	AT3G03960.1	TCP-1/cpn60 chaperonin family protein	Medtr1g030650.1	TCP-1/cpn60 chaperonin family protein
Ca13472	Ca4	35669687	35674421	0.928797	2.25653	5.13409	3.20612e-05	0.000172122	2.20145	PREDICTED: uncharacterized protein LOC101509614 n_1 Tax_Cicer arietinum RepID_UPI00032AA3D3			Medtr1g030640.1	DUF3326 family protein
Ca13478	Ca4	35777767	35781771	-0.957674	4.28913	-6.49231	1.17612e-06	1.26504e-05	5.22943	PREDICTED: bifunctional protein FolD 1 - mitochondrial-like n_1 Tax_Cicer arietinum RepID_UPI00032A91CC	AT2G38660.3	Amino acid dehydrogenase family protein	Medtr1g030450.1	methylenetetrahydrofolate dehydrogenase
Ca13489	Ca4	35915083	35922722	-1.31596	7.99015	-8.89873	5.79366e-09	3.30649e-07	10.5605	Chlorophyllide A oxygenase n_2 Tax_Papilionoideae RepID_G7I8G8_MEDTR	AT1G44446.3	Pheophorbide a oxygenase	Medtr7g005870.1	PPR containing plant-like protein
Ca13493	Ca4	35993979	35999556	-3.90906	2.59296	-7.85341	5.3035e-08	1.37992e-06	8.52762	Transmembrane amino acid transporter family protein n_2 Tax_Papilionoideae RepID_A0A072VQV2_MEDTR	AT1G77380.1	amino acid permease 3	Medtr1g029750.1	transmembrane amino acid transporter family protein
Ca13497	Ca4	36034011	36043297	-0.755375	4.91709	-6.45953	1.27091e-06	1.33782e-05	5.13064	PREDICTED: uncharacterized protein At1g21580 n_1 Tax_Cicer arietinum RepID_UPI00032A88B8	AT1G21580.1	Zinc finger C-x8-C-x5-C-x3-H type family	Medtr1g029710.14	zinc finger CCCH domain protein%2C putative
Ca13501	Ca4	36139192	36147057	-1.12691	7.19342	-6.57622	9.6501e-07	1.07579e-05	5.40827	PREDICTED: NAD kinase 2 - chloroplastic-like n_1 Tax_Cicer arietinum RepID_UPI00032A86D7	AT1G21640.1	NAD kinase 2	Medtr1g029620.2	NAD/NADH kinase family protein
Ca13525	Ca4	36280496	36289841	-0.394138	5.41097	-5.02614	4.19668e-05	0.00021439	1.62079	Transcriptional corepressor SEUSS-like protein n_2 Tax_Papilionoideae RepID_A0A072VQS3_MEDTR	AT1G43850.2	SEUSS transcriptional co-regulator	Medtr1g029400.1	transcriptional corepressor SEUSS-like protein
Ca13526	Ca4	36316137	36318911	1.80667	4.81627	10.2791	3.86516e-10	5.57713e-08	13.3013	PREDICTED: bidirectional sugar transporter SWEET1 n_1 Tax_Cicer arietinum RepID_UPI00032AC953	AT1G21460.1	Nodulin MtN3 family	Medtr1g029380.1	bidirectional sugar transporter
Ca13535	Ca4	36520014	36523861	0.513692	3.27209	5.02315	4.22814e-05	0.000215571	1.74222	PREDICTED: plastid division protein PDV1 n_1 Tax_Cicer arietinum RepID_UPI00032A7006	AT5G53280.1	plastid division1	Medtr1g028580.1	plastid division PDV1-like protein%2C putative
Ca13537	Ca4	36569139	36576208	-0.900524	2.73034	-6.85772	5.00038e-07	6.67955e-06	6.24162	PREDICTED: dihydrofolate synthetase n_1 Tax_Cicer arietinum RepID_UPI00032A7041	AT5G41480.1	Folylpolyglutamate	Medtr7g100937.1	folylpolyglutamate synthase
Ca13541	Ca4	36632265	36641550	0.539649	8.21473	5.71427	7.64779e-06	5.4482e-05	3.31133	PREDICTED: ATP-dependent zinc metalloprotease FTSH 11 - chloroplastic/mitochondrial n_1 Tax_Cicer arietinum RepID_UPI00032A91E0	AT5G53170.1	FTSH protease 11	Medtr1g028390.1	ATP-dependent zinc metalloprotease FTSH protein
Ca13545	Ca4	36644429	36646662	1.08616	3.04577	6.89826	4.55237e-07	6.24802e-06	6.32752	Abscisic acid receptor PYL9-like protein n_2 Tax_Papilionoideae RepID_A0A072VQL7_MEDTR	AT5G53160.2	regulatory components of	Medtr1g028380.1	abscisic acid receptor PYL9-like protein
Ca13574	Ca4	37128385	37132953	1.56289	4.20724	7.68701	7.64647e-08	1.7774e-06	7.99928	PREDICTED: la protein 1 n_1 Tax_Cicer arietinum RepID_UPI00032A51B7			Medtr1g026890.1	RNA recognition motif protein
Ca13578	Ca4	37150150	37166720	-1.25468	6.36311	-5.37839	1.74792e-05	0.000104965	2.5016	PREDICTED: probable sodium/metabolite cotransporter BASS4 - chloroplastic n_2 Tax_Cicer arietinum RepID_UPI00032AA2CC	ATMG00860.1	DNA/RNA polymerases superfamily	Medtr6g045307.1	IPP transferase
Ca13585	Ca4	37284667	37298989	-1.46994	4.17302	-6.28271	1.93488e-06	1.86242e-05	4.74786	PREDICTED: probable glycosyltransferase At5g03795 n_1 Tax_Cicer arietinum RepID_UPI00032A8C8A	AT5G25820.1	Exostosin family protein	Medtr1g006600.1	exostosin family protein
Ca13596	Ca4	37393692	37405306	1.18345	2.07895	4.72032	9.02399e-05	0.000402044	1.2365	Nup85 nucleoporin protein n_2 Tax_Papilionoideae RepID_G7IB50_MEDTR	AT5G11580.1	Regulator of chromosome condensation	Medtr1g006695.1	E3 ubiquitin-protein ligase HERC2-like protein
Ca13602	Ca4	37550285	37555076	-0.418624	6.24182	-5.30404	2.10141e-05	0.000122349	2.31728	PREDICTED: RNA polymerase sigma factor sigC n_1 Tax_Cicer arietinum RepID_UPI00032AC3E1	AT3G53920.1	RNApolymerase sigma-subunit	Medtr1g007370.2	RNA polymerase sigma factor
Ca13611	Ca4	37674065	37677828	1.52538	4.59118	7.27305	1.93059e-07	3.3555e-06	7.05236	PREDICTED: uncharacterized protein LOC101511767 n_1 Tax_Cicer arietinum RepID_UPI00032A7373	AT5G48470.1	unknown protein; FUNCTIONS IN: molecular_function	Medtr1g007490.1	hypothetical protein
Ca13627	Ca4	37686413	37690227	0.600978	4.76763	6.2082	2.31231e-06	2.13955e-05	4.5331	PREDICTED: GTPase-activating protein gyp7-like n_1 Tax_Cicer arietinum RepID_UPI00032A948D	AT3G49350.1	Ypt/Rab-GAP domain of gyp1p superfamily	Medtr1g007590.1	Rab GTPase activator
Ca13625	Ca4	37695283	37703341	1.12587	1.94446	5.45546	1.44475e-05	8.99733e-05	3.05125	TLC ATP/ADP transporter n_8 Tax_Papilionoideae RepID_G7I3E2_MEDTR	AT5G05310.1	TLC ATP/ADP transporter	Medtr1g007630.1	TLC ATP/ADP transporter
Ca13628	Ca4	37710895	37717115	-0.593961	2.60571	-5.75964	6.845e-06	5.0117e-05	3.65152	PREDICTED: exonuclease mut-7 homolog n_1 Tax_Cicer arietinum RepID_UPI00032A4F0F	AT5G24340.1	3'-5' exonuclease domain-containing	#N/A	#N/A
Ca13622	Ca4	37787268	37788721	5.14657	2.94271	8.00154	3.84111e-08	1.14746e-06	8.84985	PREDICTED: uncharacterized protein LOC101488636 n_1 Tax_Cicer arietinum RepID_UPI00032A88A5			Medtr1g007840.1	transmembrane protein%2C putative
Ca13634	Ca4	37813668	37816636	-1.06564	0.541706	-4.84905	6.5351e-05	0.000309073	1.77468	PREDICTED: uncharacterized protein At4g00950-like n_1 Tax_Cicer arietinum RepID_UPI00032ABA95	AT5G53030.2	unknown protein; CONTAINS InterPro	Medtr1g007905.1	hypothetical protein
Ca13645	Ca4	38062583	38065803	-1.94735	6.67625	-12.7221	5.51406e-12	5.47302e-09	17.5519	PREDICTED: dehydration-responsive protein RD22 n_1 Tax_Cicer arietinum RepID_UPI00032A7BE2	AT5G25610.1	BURP domain-containing	Medtr1g008500.1	dehydration-responsive protein RD22
Ca13656	Ca4	38168013	38184545	0.38918	5.45342	4.84571	6.59002e-05	0.000311094	1.17167	PREDICTED: uncharacterized protein LOC101504060 n_1 Tax_Cicer arietinum RepID_UPI00032A5DA0	AT5G19820.1	ARM repeat superfamily protein	Medtr8g085950.1	importin beta-3%2C putative
Ca13663	Ca4	38208106	38210185	-2.61383	0.131356	-4.57337	0.000130496	0.000545809	1.15872	Uncharacterized protein n_10 Tax_Papilionoideae RepID_I1MW76_SOYBN	AT4G31330.1	Protein of unknown function, DUF599	Medtr1g009030.1	plant/F12B17-70 protein
Ca13672	Ca4	38355789	38379372	1.03217	4.84056	5.07215	3.74141e-05	0.000195039	1.75301	PREDICTED: DNA topoisomerase 3-alpha isoform X2 n_1 Tax_Cicer arietinum RepID_UPI00032A6C31	AT4G31210.1	DNA topoisomerase, type IA, core	Medtr1g009315.1	DNA topoisomerase I%2C bacterial protein
Ca13667	Ca4	38382072	38385215	0.909288	4.97827	6.40586	1.44331e-06	1.48257e-05	5.00536	Uncharacterized protein n_2 Tax_Gossypium raimondii RepID_A0A0D2UIE4_GOSRA			#N/A	#N/A
Ca13676	Ca4	38449476	38450925	-1.11863	4.53936	-7.10251	2.84597e-07	4.39689e-06	6.6476	PREDICTED: probable serine/threonine-protein kinase kinX isoform X1 n_2 Tax_Cicer arietinum RepID_UPI00032AAEE4	AT5G24890.1	unknown protein; FUNCTIONS IN: molecular_function	Medtr1g009640.1	hypothetical protein
Ca13677	Ca4	38460153	38468449	0.631455	4.5244	8.20102	2.49914e-08	8.6305e-07	9.10307	PREDICTED: pentatricopeptide repeat-containing protein At5g10690 n_1 Tax_Cicer arietinum RepID_UPI00032A94E6	AT5G10690.1	pentatricopeptide (PPR) repeat-containing	Medtr1g009650.1	pentatricopeptide (PPR) repeat protein
Ca13683	Ca4	38573115	38575783	0.811616	4.73306	6.33008	1.72822e-06	1.70203e-05	4.82836	PREDICTED: zinc finger protein 622-like n_1 Tax_Cicer arietinum RepID_UPI00032A9E47	AT4G31420.2	Zinc finger protein 622	Medtr1g009770.1	C2H2-type zinc finger protein
Ca13696	Ca4	38659970	38662696	-0.773695	8.3675	-8.82285	6.77081e-09	3.63367e-07	10.3969	Plastid lipid-associated protein n_3 Tax_Papilionoideae RepID_A0A072VE99_MEDTR	AT5G19940.2	Plastid-lipid associated protein PAP	Medtr1g009980.1	plastid lipid-associated protein
[truncated: 1,871 more rows]
