# Supplementary material for: Comparative transcriptome analysis reveals molecular regulation of salt tolerance in two contrasting chickpea genotypes
Source: Front Plant Sci. 2023 May 30;14:1191457. doi: 10.3389/fpls.2023.1191457 (PMC10289292; doi:10.3389/fpls.2023.1191457)
Supplement: Supplementary file 7 [file Table_7.xlsx]

## Sheet: Interaction
Genotype-dependent salt-responsive genes
Gene ID	Chr	Start	End	logFC	AveExpr	t	P.Value	adj.P.Val	B	Chickpea Annotation	At Homologue	At Annotation	Mt Homologue	Mt Annotation
Ca07363	Ca1	1404696	1407361	-0.42631	5.1336	-5.28091	2.2255e-05	0.00654596	2.74734	PREDICTED: transcription factor GTE7-like n_1 Tax_Cicer arietinum RepID_UPI00032AC638	AT5G65630.1	GTE7 | global transcription factor group.	Medtr4g092900.4	global transcription factor group protein
Ca07280	Ca1	4232597	4238457	0.6357	4.18349	7.92737	4.51275e-08	0.000230075	8.68133	PREDICTED: zinc finger CCCH domain-containing protein 34-like n_1 Tax_Cicer arietinum RepID_UPI00032A9CBF	AT5G18550.1	Zinc finger C-x8-C-x5-C-x3-H type family	Medtr2g019740.1	zinc finger C-x8-C-x5-C-x3-H type protein
Ca07726	Ca1	7745482	7759928	-0.75713	4.71281	-5.19072	2.78454e-05	0.00686927	2.53932	PREDICTED: ent-kaurenoic acid oxidase 2-like n_1 Tax_Cicer arietinum RepID_UPI00032A9263	AT1G05160.1	CYP88A3, ATKAO1, KAO1 | cytochrome P450, brassinosteroid biosynthetic process, brassinosteroid homeostasis, gibberellin biosynthetic process, multicellular organism development, sterol metabolic process	Medtr2g031920.1	cytochrome P450 family ent-kaurenoic acid oxidase
Ca08205	Ca1	10037259	10043896	-0.506826	4.08984	-6.01661	3.66646e-06	0.0026704	4.49245	Myosin-like protein n_3 Tax_Papilionoideae RepID_G7ZWG9_MEDTR	AT1G55170.1	unknown protein; BEST Arabidopsis thaliana. DNA double-strand break repair protein	Medtr2g100240.9	myosin-like protein
Ca07972	Ca1	10053226	10056827	0.692116	4.63863	5.45448	1.44822e-05	0.00540258	3.17441	PREDICTED: uncharacterized protein LOC101508069 n_1 Tax_Cicer arietinum RepID_UPI00032AAD1E	AT1G55140.1	Ribonuclease III family protein | RNA processing	Medtr2g100220.1	ribonuclease III domain protein
Ca07995	Ca1	10302970	10306789	-0.696769	3.14707	-4.70843	9.29728e-05	0.0134153	1.44494	PREDICTED: nuclear transcription factor Y subunit A-3-like n_1 Tax_Cicer arietinum RepID_UPI00032AD2F9	AT1G72830.2	HAP2C, ATHAP2C, NF-YA3 | nuclear factor, regulation of transcription, DNA-templated, root development	Medtr2g099490.1	CCAAT-binding transcription factor
Ca08002	Ca1	10466048	10467465	0.730505	7.13086	6.26826	2.00281e-06	0.00180194	5.06721	PREDICTED: B-box zinc finger protein 25-like n_1 Tax_Cicer arietinum RepID_UPI00032AB539	AT1G06040.2	STO | B-box zinc finger family protein. Encodes salt tolerance protein (STO) which confers salt tolerance to yeast cells. Fully complements calcineurin deficient yeast but does not encode a phosphoprotein phosphatase. Sequence has similarities to CONSTANS. STO co-localizes with COP1 and plays a role in light signaling.STO transcript levels are regulated by photoperiod and phtyohormones. STO compe…	Medtr2g099010.3	salt tolerance-like protein
Ca08373	Ca1	13979026	13981382	-1.07969	6.60717	-6.4004	1.46214e-06	0.00174747	5.37027	Chaperone dnaJ 3-like protein n_3 Tax_Pentapetalae RepID_A0A0B0ML43_GOSAR	AT3G44110.2	ATJ3, ATJ | DNAJ homologue 3 | photoperiodism, flowering, positive regulation of flower development, protein folding, regulation of ATPase activity, response to salt stress, response to heat	Medtr2g087660.2	DnaJ-class molecular chaperone
Ca08444	Ca1	14763229	14767272	-0.720764	2.58312	-5.36996	1.78477e-05	0.00583131	3.00007	PREDICTED: BTB/POZ domain-containing protein At3g44820 n_1 Tax_Cicer arietinum RepID_UPI00032AA476	AT3G44820.1	Phototropic-responsive NPH3 family. negative regulation of cellular biosynthetic process, oxoacid metabolic process, positive regulation of cellular process, response to abscisic acid, tropism. protein ubiquitination	Medtr2g084595.1	phototropic-responsive NPH3 family protein
Ca09027	Ca1	23017921	23022042	-0.581157	5.13474	-4.61227	0.000118352	0.015085	1.13815	PREDICTED: 1 -4-dihydroxy-2-naphthoyl-CoA thioesterase 1 n_1 Tax_Cicer arietinum RepID_UPI00032AD339	AT1G48320.1	Thioesterase superfamily protein | phylloquinone biosynthetic process, protein homotetramerization	Medtr2g045080.1	acyl-CoA thioesterase
Ca09869	Ca1	37786446	37789558	-0.887082	3.01934	-5.2299	2.52608e-05	0.0068053	2.67579	Branched-chain-amino-acid aminotransferase-like protein n_3 Tax_Papilionoideae RepID_I3SQ86_MEDTR	AT5G57850.1	D-aminoacid aminotransferase-like PLP-dependent. ADCL encodes a protein that acts as a 4-amino-4-deoxychorismate lyase. It catalyzes the production 4-aminobenzoate (pABA) production which is required for folate biosynthesis. The enzyme localizes to chloroplasts based on an import assay and GFP localization experiments. Involved in D-Amino Acid Stimulated Ethylene Production.carboxylic acid metabo…	Medtr2g078730.1	branched-chain-amino-acid aminotransferase-like protein
Ca10281	Ca1	44736077	44738646	-1.39128	3.36842	-5.28953	2.17844e-05	0.00653318	2.80884	PREDICTED: uncharacterized protein LOC101515712 isoform X3 n_1 Tax_Cicer arietinum RepID_UPI00032A7088	AT2G24300.2	Calmodulin-binding protein | cellular response to lipid, cellular response to oxygen-containing compound, hormone-mediated signaling pathway, regulation of salicylic acid biosynthetic process	Medtr2g450080.1	calmodulin-binding protein
Ca10307	Ca1	45233498	45236921	-0.896813	1.78507	-4.52256	0.000148259	0.0173101	1.03389	PREDICTED: heptahelical transmembrane protein 2-like isoform X1 n_2 Tax_Cicer arietinum RepID_UPI00032A6A2E	AT4G30850.2	HHP2 | heptahelical transmembrane protein2. response to hormone, response to sucrose	Medtr0066s0050.1	hemolysin-III-like protein
Ca28817	Ca2	1776250	1781345	-1.17402	2.76517	-4.99915	4.48932e-05	0.00934386	2.14319	PREDICTED: protein argonaute 7 n_1 Tax_Cicer arietinum RepID_UPI00032A5FD2	AT1G69440.1	AGO7, ZIP | Argonaute family protein | Encodes ARGONAUTE7, a member of the ARGONAUTE family, characterised by the presence of PAZ and PIWI domains. Involved in the regulation of developmental timing. Required for the accumulation of TAS3 ta-siRNAs but not for accumulation of miR171, miR173, miR390 or mi391. Localized in mature rosette leaves and floral buds. RNAi-mediated antiviral immune respons…	Medtr5g042590.1	eukaryotic translation initiation factor 2c
Ca29586	Ca2	12436826	12440880	-0.415944	3.84396	-5.19333	2.76655e-05	0.00686927	2.56155	PREDICTED: rRNA-processing protein UTP23 homolog n_1 Tax_Cicer arietinum RepID_UPI00032A631F	AT2G34570.1	MEE21 | PIN domain-like family protein. embryo development ending in seed dormancy	Medtr2g097630.8	rRNA-processing protein PIN domain protein
Ca29695	Ca2	13800406	13804891	-1.5	7.30265	-6.08926	3.07699e-06	0.00235451	4.65332	Trans-cinnamate 4-monooxygenase n_14 Tax_Papilionoideae RepID_TCMO_CICAR	AT2G30490.1	ATC4H, C4H, CYP73A5, REF3 | cinnamate-4-hydroxylase. Mutations in this gene impact phenylpropanoid metabolism, growth and development. developmental process, lignin metabolic process, phenylpropanoid biosynthetic process, phenylpropanoid metabolic process, pollen development, response to light stimulus, response to wounding, ubiquinone biosynthetic process	Medtr5g075450.1	cytochrome P450 family cinnamate 4-hydroxylase
Ca29884	Ca2	16273197	16276791	0.594631	7.0695	5.55555	1.1289e-05	0.00479624	3.40253	Uncharacterized protein n_8 Tax_Pentapetalae RepID_M1B9V2_SOLTU	AT2G39770.2	CYT1 | Glucose-1-phosphate adenylyltransferase. GDP-mannose biosynthetic process, cell wall mannoprotein biosynthetic process, protein glycosylation.	Medtr5g080770.1	mannose-1-phosphate guanylyltransferase-like protein
Ca30011	Ca2	17976236	17980227	0.564666	2.7024	4.90544	5.67467e-05	0.0103077	1.92548	Uncharacterized protein n_10 Tax_Papilionoideae RepID_I1JVB1_SOYBN	AT4G09012.1	Mitochondrial ribosomal protein L27. translation	Medtr5g045910.1	LRR receptor-like kinase family protein
Ca30397	Ca2	21655581	21658942	-0.569845	8.09326	-5.17989	2.86062e-05	0.00692199	2.4999	Heat shock protein 90-2 n_220 Tax_Eukaryota RepID_HS902_ARATH	AT5G56030.2	HSP81-2 | heat shock protein 81-2 | cellular response to heat, chaperone-mediated protein folding, defense response to bacterium, protein folding, protein stabilization. chaperone-mediated protein complex assembly, defense response, flower development, heat acclimation, leaf development, negative regulation of seed germination, protein stabilization, response to heat, response to salt stress, res…	Medtr5g096460.1	heat shock protein 81-2
Ca30470	Ca2	22322402	22327621	-0.406945	5.21659	-4.65723	0.000105719	0.0143799	1.24628	PREDICTED: MATE efflux family protein 3 - chloroplastic isoform X2 n_1 Tax_Cicer arietinum RepID_UPI00032A6FEC	AT4G38380.1	MATE efflux family protein | transmembrane transport	Medtr5g099020.2	MATE efflux family protein
Ca30986	Ca2	30677606	30678973	-1.84905	4.10533	-5.86604	5.28157e-06	0.00299191	4.14638	PREDICTED: phenolic glucoside malonyltransferase 1-like n_1 Tax_Cicer arietinum RepID_UPI00032A6152	AT5G39050.1	HXXXD-type acyl-transferase family.	Medtr6g015315.1	malonyl-CoA:isoflavone 7-O-glucoside malonyltransferase
Ca31072	Ca2	31581982	31587330	-0.430839	5.64061	-4.89238	5.86318e-05	0.0103077	1.81415	PREDICTED: sulfite oxidase n_1 Tax_Cicer arietinum RepID_UPI00032A5980	AT3G01910.2	SOX, AT-SO, AtSO | sulfite oxidase | chlorophyll metabolic process, response to sulfur dioxide, sulfur compound metabolic process	Medtr6g023975.2	sulfite oxidase-like protein
Ca31243	Ca2	33745378	33749473	0.567124	7.33536	4.93043	5.33074e-05	0.00994314	1.90578	PREDICTED: uncharacterized protein LOC101511229 n_1 Tax_Cicer arietinum RepID_UPI00032AC532	AT5G38510.2	Rhomboid-related intramembrane serine protease family protein. signal peptide processing,negative regulation of gene expression	Medtr0024s0260.2	S54 family peptidase
Ca31442	Ca2	36404174	36406211	2.04289	0.468483	7.40158	1.4446e-07	0.000441902	5.77689	PREDICTED: CLAVATA3/ESR (CLE)-related protein 25 n_1 Tax_Cicer arietinum RepID_UPI00032A8E14	#N/A	#N/A	#N/A	#N/A
Ca24470	Ca3	3802435	3807060	-0.399228	5.37861	-4.57096	0.000131287	0.0163255	1.0406	PREDICTED: ethylene-responsive transcription factor-like protein At4g13040 isoform X1 n_5 Tax_Cicer arietinum RepID_UPI00032A70BD	AT4G13040.1	Integrase-type DNA-binding superfamily, Encodes a member of the AP2/EREBP transcription factor family that has only one AP2 domain. It is a positive regulator of disease defense that functions upstream of SA accumulation.positive regulation of defense response to bacterium, regulation of salicylic acid metabolic process	Medtr7g055857.1	ethylene response factor
Ca24486	Ca3	4022293	4117518	-1.37117	1.77964	-7.40862	1.42192e-07	0.000441902	7.10562	PREDICTED: BEL1-like homeodomain protein 9 n_1 Tax_Cicer arietinum RepID_UPI00032A891B	AT5G02030.1	BEL1-LIKE HOMEODOMAIN 9, BELLRINGER, BLH9, BLR, HB-6, LARSON, LSN, PENNYWISE, PNY, REPLUMLESS, RPL, VAAMANA, VAN | Mutant has additional lateral organs and phyllotaxy defect. Encodes a homeodomain transcription factor. Has sequence similarity to the Arabidopsis ovule development regulator Bell1. Binds directly to the AGAMOUS cis-regulatory element. Its localization to the nucleus is dependent on …	Medtr7g065050.1	BEL1-like homeodomain protein
Ca25695	Ca3	29377577	29381541	-0.512375	4.78304	-4.66662	0.000103258	0.0142282	1.27328	PREDICTED: alpha-soluble NSF attachment protein 2-like isoform X1 n_1 Tax_Cicer arietinum RepID_UPI00032A7A95	AT3G56190.2	ALPHA-SNAP2, ASNAP | alpha-soluble NSF. SNARE complex disassembly, intracellular protein transport	Medtr7g072000.3	alpha-soluble NSF attachment protein
Ca25972	Ca3	32576620	32581488	0.493443	5.40372	5.4807	1.35752e-05	0.00536791	3.22396	PREDICTED: serine carboxypeptidase-like 20 n_1 Tax_Cicer arietinum RepID_UPI00032AC1FB	AT4G12910.1	scpl20 | serine carboxypeptidase-like. plant-type secondary cell wall biogenesis, regulation of developmental growth, response to inorganic substance, shoot system morphogenesis, small molecule metabolic process, tissue development, xylan metabolic process, secondary metabolic process	Medtr8g011350.1	serine carboxypeptidase-like protein
Ca26230	Ca3	35393550	35400335	-0.386562	3.41847	-4.96241	4.92097e-05	0.00941078	2.02954	PREDICTED: diphthine--ammonia ligase n_1 Tax_Cicer arietinum RepID_UPI00032A57DC	AT3G04480.1	endoribonucleases | chr3	Medtr7g111650.5	meiotically up-regulated protein 71-like protein
Ca26548	Ca3	38930605	38935627	0.434651	5.74244	4.84726	6.56445e-05	0.0112813	1.70584	PREDICTED: F-box protein At4g02760-like n_1 Tax_Cicer arietinum RepID_UPI00032AC51B	AT4G02760.2	RNI-like superfamily protein | SCF-dependent proteasomal ubiquitin-dependent protein catabolic process	Medtr4g095000.1	F-box protein%2C putative
Ca26593	Ca3	39091826	39093257	-0.574513	2.47159	-4.67596	0.000100864	0.0141534	1.39368	PREDICTED: BI1-like protein n_1 Tax_Cicer arietinum RepID_UPI00032A81E5	AT4G02690.1	Bax inhibitor-1 family protein | Stress induced membrane protein. Mutants show enhanced cell death under stress.cellular response to unfolded protein	Medtr7g095640.1	inhibitor of apoptosis-promoting Bax1 protein
Ca26561	Ca3	39340737	39342201	1.63142	5.75814	6.15972	2.59736e-06	0.00220704	4.81731	PREDICTED: histone H1-like n_1 Tax_Cicer arietinum RepID_UPI00032AAE21	AT2G30620.2	winged-helix DNA-binding transcription,	Medtr7g096280.1	linker histone H1 and h5 family protein
Ca26674	Ca3	40229407	40230840	-0.654936	7.21566	-5.71307	7.67028e-06	0.00366615	3.77452	Uncharacterized protein n_2 Tax_Oryza RepID_A0A0E0RCB5_ORYRU	AT5G02500.1	HSC70-1, HSP70-1, AT-HSC70-1, HSC70 | Encodes a member of heat shock protein 70 family. Hsc70-1 negatively regulates the expression of Hsp101 through HsfA1d, HsfA1e and HsfA2. During non-HS condition, Hsc70-1 attenuates the activity of HsfAs and finally affects the expression of HsfA2 and Hsp101 genes. hsc70-1 mutant showed thermotolerance phenotype due to higher expression of Hsp101 and other HS…	Medtr7g099680.1	heat shock cognate 70 kDa protein
Ca26672	Ca3	40235921	40238827	-0.800229	8.16988	-6.35405	1.63239e-06	0.00178338	5.26207	Heat shock protein 70 n_1 Tax_Camellia sinensis RepID_B3GPH1_CAMSI	AT5G02500.1	HSC70-1, HSP70-1, AT-HSC70-1, HSC70 | Encodes a member of heat shock protein 70 family. Hsc70-1 negatively regulates the expression of Hsp101 through HsfA1d, HsfA1e and HsfA2. During non-HS condition, Hsc70-1 attenuates the activity of HsfAs and finally affects the expression of HsfA2 and Hsp101 genes. hsc70-1 mutant showed thermotolerance phenotype due to higher expression of Hsp101 and other HS…	Medtr7g099680.1	heat shock cognate 70 kDa protein
Ca26759	Ca3	41025113	41029867	0.523147	6.33666	5.08295	3.64198e-05	0.00823904	2.27398	PREDICTED: RNA polymerase sigma factor sigF - chloroplastic-like n_1 Tax_Cicer arietinum RepID_UPI00032AA9F6	AT2G36990.1	SIGF, SIG6, ATSIG6, SOLDAT8 | RNApolymerase. DNA-templated transcription, initiation, cellular response to blue light, cellular response to light stimulus, seedling development	Medtr7g101840.1	RNA polymerase sigma factor
Ca27292	Ca3	47677075	47682777	-1.47607	3.03463	-5.35011	1.87468e-05	0.00596376	2.95784	PREDICTED: probable glutamate carboxypeptidase 2 n_1 Tax_Cicer arietinum RepID_UPI00032A6CF2	AT3G54720.1	AMP1, COP2, HPT, PT, MFO1 | Peptidase. Encodes glutamate carboxypeptidase. Various alleles show-increased cotyledon number and rate of leaf initiation, show transformation of leaves to cotyledons, altered flowering time and photomorphogenesis and an increased level of cytokinin biosynthesis. Involved in ethylene enhanced hypocotyl elongation in the light. Strong genetic interaction between TGH an…	Medtr7g107100.8	glutamate carboxypeptidase%2C putative
Ca27910	Ca3	51350407	51355021	0.666627	6.74892	6.76235	6.24116e-07	0.00119323	6.18752	PREDICTED: two-component response regulator-like APRR9 n_1 Tax_Cicer arietinum RepID_UPI00032AB668	AT5G24470.1	APRR5, PRR5 | pseudo-response regulator. circadian rhythm, import into nucleus, negative regulation of transcription, DNA-templated, photomorphogenesis, regulation of transcription, DNA-templated, response to far red light, response to red light	Medtr7g118260.4	PRR response regulator
Ca27987	Ca3	55092728	55098202	-0.472058	3.07557	-4.93338	5.29148e-05	0.00994314	1.97537	PREDICTED: uncharacterized WD repeat-containing protein C2A9.03-like isoform X1 n_2 Tax_Cicer arietinum RepID_UPI00032A8C7E	AT1G55680.1	Transducin/WD40 repeat-like superfamily	Medtr7g022190.1	transducin/WD40 repeat protein
Ca28137	Ca3	57210181	57211749	-1.10238	8.49406	-6.29035	1.89993e-06	0.00180194	5.1137	Heat shock protein n_4 Tax_Spermatophyta RepID_A0A076KXD2_CICAR	AT3G12580.1	HSP70, ATHSP70 | heat shock protein 70, protein folding, response to bacterium, response to heat, response to temperature stimulus, response to virus, cellular response to unfolded protein, chaperone cofactor-dependent protein refolding, protein refolding, protein ubiquitination, response to heat	Medtr7g024580.1	heat shock cognate 70 kDa protein
Ca28136	Ca3	57216046	57219663	-1.06692	9.11516	-6.27954	1.94959e-06	0.00180194	5.08352	Heat shock protein n_4 Tax_Spermatophyta RepID_A0A076KXD2_CICAR	AT3G12580.1	HSP70, ATHSP70 | heat shock protein 70. cellular response to unfolded protein, chaperone cofactor-dependent protein refolding, protein refolding, protein ubiquitination, response to heat, protein folding, response to bacterium, response to heat, response to temperature stimulus, response to virus	Medtr7g024580.1	heat shock cognate 70 kDa protein
Ca28389	Ca3	61048010	61050995	-0.653481	3.56796	-4.89437	5.83404e-05	0.0103077	1.862	PREDICTED: transcription factor bHLH62 isoform X1 n_2 Tax_Cicer arietinum RepID_UPI00032A6E85	AT3G07340.1	basic helix-loop-helix (bHLH) DNA-binding	Medtr7g053410.1	BHLH transcription factor
Ca10668	Ca4	1395101	1396219	1.51002	5.08386	5.46464	1.41237e-05	0.00540056	3.18675	PREDICTED: histone H1 n_1 Tax_Cicer arietinum RepID_UPI00032A5A2A	AT1G06760.1	winged-helix DNA-binding transcription. chromosome condensation, negative regulation of DNA recombination, nucleosome assembly, nucleosome positioning, anatomical structure maturation, cell differentiation, organelle organization, plant epidermis development, root morphogenesis	Medtr1g070440.1	linker histone H1 and h5 family protein
Ca10694	Ca4	1691629	1697706	-1.29417	2.79626	-9.26721	2.74696e-09	2.10074e-05	10.9934	PREDICTED: heat stress transcription factor A-6b-like n_1 Tax_Cicer arietinum RepID_UPI00032AA927	AT3G22830.1	AT-HSFA6B, HSFA6B | heat shock transcription, abscisic acid-activated signaling pathway, cellular catabolic process, organic substance catabolic process, regulation of transcription, DNA-templated, response to chitin, response to cold, response to osmotic stress, response to water deprivation	Medtr1g071360.2	heat shock transcription factor A3
Ca10735	Ca4	2127210	2128190	-1.18994	3.82886	-4.99636	4.52073e-05	0.00934386	2.09626	PREDICTED: adenylate isopentenyltransferase 3 - chloroplastic n_1 Tax_Cicer arietinum RepID_UPI00032AB280	AT3G63110.1	ATIPT3, IPT3 | isopentenyltransferase, Encodes cytokinin synthase involved in cytokinin biosynthesis. IPT3 subcellular localization is modulated by farnesylation- when farnesylated it is localized to the nucleus, otherwise to the chloroplast.cytokinin biosynthetic process, tRNA modification	Medtr1g072540.1	adenylate isopentenyltransferase
Ca11145	Ca4	5954497	5956603	0.501357	2.94764	5.34245	1.91059e-05	0.00596376	2.93968	PREDICTED: uncharacterized protein LOC101510246 n_1 Tax_Cicer arietinum RepID_UPI00032AA9AC	AT1G56423.1	unknown protein; FUNCTIONS IN	Medtr1g084040.1	hypothetical protein
Ca11168	Ca4	6018319	6023789	0.476527	7.08808	4.79858	7.41605e-05	0.0114676	1.58932	PREDICTED: solute carrier family 40 member 3 - chloroplastic n_1 Tax_Cicer arietinum RepID_UPI00032A50BA	AT5G26820.1	ATIREG3, MAR1, RTS3, IREG3 | iron-regulated. iron ion transmembrane transport, iron ion transport	Medtr1g084140.2	solute carrier family 40 protein
Ca11181	Ca4	6132028	6135645	0.446969	3.33888	5.17489	2.89642e-05	0.00692199	2.53575	PREDICTED: zinc finger CCCH domain-containing protein 3 n_1 Tax_Cicer arietinum RepID_UPI00032ACD61	AT5G26749.2	C2H2 and C2HC zinc fingers superfamily. mRNA processing, negative regulation of gene expression, plastid organization	Medtr1g084750.1	U1 zinc finger protein
Ca11346	Ca4	7606558	7609421	-0.758938	4.3134	-5.6963	7.99148e-06	0.00370393	3.74206	PREDICTED: uncharacterized protein OsI_027940-like n_1 Tax_Cicer arietinum RepID_UPI00032A67A3	AT4G02450.2	HSP20-like chaperones superfamily protein. chaperone cofactor-dependent protein refolding, chaperone-mediated protein complex assembly, protein folding, response to heat. negative regulation of cytokinin-activated signaling pathway, positive regulation of gene expression, regulation of auxin polar transport, root meristem growth	Medtr1g088700.1	CS domain protein
Ca11523	Ca4	9145202	9147582	0.7631	4.19984	4.69183	9.69277e-05	0.0137269	1.35235	Myb-like transcription factor family protein n_1 Tax_Medicago truncatula RepID_G7I465_MEDTR	#N/A	#N/A	Medtr1g093080.3	myb-like transcription factor family protein
Ca11990	Ca4	14019302	14019841	-0.986764	2.03941	-5.07479	3.71686e-05	0.00823904	2.29437	PREDICTED: phytosulfokines 3-like n_1 Tax_Cicer arietinum RepID_UPI00032A4F06	#N/A	#N/A	Medtr1g106030.1	phytosulfokine precursor protein
Ca12177	Ca4	16122774	16125526	-0.420063	3.96848	-5.26896	2.2925e-05	0.00661582	2.73758	PREDICTED: serine/threonine protein phosphatase 2A 57 kDa regulatory subunit B'''' beta isoform-like n_1 Tax_Cicer arietinum RepID_UPI00032A8A73	AT5G03470.1	ATB' ALPHA | Protein phosphatase 2A regulatory. megasporogenesis, meiotic sister chromatid cohesion, microsporogenesis, regulation of phosphorylation	Medtr1g111570.1	protein phosphatase 2A regulatory B subunit family protein
Ca12227	Ca4	16670736	16674289	-0.425771	3.41561	-4.56042	0.000134811	0.0164955	1.07199	PREDICTED: probable protein phosphatase 2C 79 n_1 Tax_Cicer arietinum RepID_UPI00032A8397	AT3G51370.2	Protein phosphatase 2C family protein. cellular catabolic process, organic substance catabolic process	Medtr1g112840.1	serine/threonine phosphatase family%2C 2C domain protein
Ca12628	Ca4	22132554	22136159	-0.669853	5.40914	-4.79823	7.42264e-05	0.0114676	1.58968	PREDICTED: uncharacterized protein LOC101499059 isoform X1 n_3 Tax_Cicer arietinum RepID_UPI00032A5BF7	AT3G11760.1	unknown protein; FUNCTIONS IN	Medtr1g056180.1	EEIG1/EHBP1 protein amine-terminal domain protein
Ca13196	Ca4	31485435	31523796	0.752114	6.20092	4.63046	0.000113068	0.0150482	1.1835	Calcium-transporting ATPase n_4 Tax_Papilionoideae RepID_Q93YX7_MEDTR	AT3G57330.1	ACA11 | autoinhibited Ca2+-ATPase 11 | anion homeostasis, defense response to bacterium, negative regulation of programmed cell death, calcium ion transmembrane transport	Medtr4g008650.2	membrane calcium-translocating P-type ATPase
Ca13996	Ca4	43505536	43509689	-0.744857	5.0044	-5.07582	3.70728e-05	0.00823904	2.25674	PREDICTED: uncharacterized protein LOC101491980 isoform X2 n_1 Tax_Cicer arietinum RepID_UPI000640E4C2	AT5G53420.3	CCT motif family protein | esponse to nitrate starvation	Medtr1g008220.2	CCT motif protein
Ca14195	Ca4	47061858	47080325	-0.479454	4.69898	-4.90781	5.64107e-05	0.0103077	1.85453	Pyruvate kinase n_8 Tax_Papilionoideae RepID_A0A072VP40_MEDTR	AT4G23160.1	CRK8 | cysteine-rich RLK (RECEPTOR-like protein kinase. defense response to bacterium, protein phosphorylation	Medtr6g472230.1	disease resistance protein (TIR-NBS-LRR class)%2C putative
Ca14213	Ca4	47443210	47453879	-0.523457	4.88899	-5.78041	6.50659e-06	0.00333663	3.93323	PREDICTED: serine carboxypeptidase-like n_1 Tax_Cicer arietinum RepID_UPI00032A6A25	AT3G45010.1	scpl48 | serine carboxypeptidase-like. cellular developmental process, defense response to other organism, oxoacid metabolic process, plant-type secondary cell wall biogenesis, response to inorganic substance, xylan metabolic process	Medtr1g050545.1	serine carboxypeptidase-like protein
Ca14336	Ca4	49992532	49998562	0.743084	8.37721	5.89576	4.91352e-06	0.00289048	4.19784	DNA-binding protein SMUBP-2 n_2 Tax_Papilionoideae RepID_A0A072VHR8_MEDTR	AT5G35970.1	P-loop containing nucleoside triphosphate. chlorophyll metabolic process, negative regulation of cellular metabolic process, organic acid metabolic process, pigment metabolic process, response to blue light, response to light intensity, response to osmotic stress, response to red or far red light, response to water deprivation, small molecule biosynthetic process, terpenoid metabolic process	Medtr1g040155.1	DNA-binding protein SMUBP-2
Ca14477	Ca4	52735116	52736735	-0.99495	2.07364	-4.80311	7.33234e-05	0.0114676	1.684	PREDICTED: alkane hydroxylase MAH1-like n_3 Tax_Cicer arietinum RepID_UPI00032A6C25	AT2G23180.1	CYP96A1 | cytochrome P450, family 96, embryo development, response to light stimulus, seed development	Medtr1g050362.1	cytochrome P450 family protein
Ca14582	Ca4	54131398	54132239	-2.79219	2.36679	-4.83175	6.82451e-05	0.0113458	1.74207	PREDICTED: early nodulin-like protein 3 n_1 Tax_Cicer arietinum RepID_UPI00032A95A9	AT4G31840.1	ENODL15, AtENODL15 | early nodulin-like. anchored component of membrane, extracellular region, plasma membrane, secretory vesicle, electron transfer activity	Medtr3g105930.1	early nodulin-like protein
Ca19555	Ca5	4035403	4037100	0.988596	3.90741	4.82526	6.93636e-05	0.0114077	1.68133	PREDICTED: spermidine hydroxycinnamoyl transferase-like n_1 Tax_Cicer arietinum RepID_UPI0006418158	AT2G19070.1	SHT | spermidine hydroxycinnamoyl transferase.	Medtr3g026950.1	spermidine hydroxycinnamoyl transferase
Ca19792	Ca5	6598812	6601730	-0.998777	8.7252	-5.52035	1.23111e-05	0.00508915	3.30472	Heat shock protein 90-2 n_220 Tax_Eukaryota RepID_HS902_ARATH	AT5G56000.1	Hsp81.4, AtHsp90.4 | HEAT SHOCK PROTEIN, cellular response to heat, protein folding, protein stabilization, organelle organization	Medtr5g096460.1	heat shock protein 81-2
Ca19998	Ca5	9026174	9031010	-0.645304	9.63882	-4.87395	6.14003e-05	0.0106718	1.7291	Cinnamoyl-CoA reductase-like protein n_3 Tax_Papilionoideae RepID_G7J0Q8_MEDTR	AT5G58490.1	NAD(P)-binding Rossmann-fold superfamily. oxidoreductase activity, acting on the CH-OH group of donors, NAD or NADP as acceptor	Medtr3g031650.2	cinnamoyl-CoA reductase-like protein
Ca20039	Ca5	9319710	9322667	1.68382	0.0239815	5.61776	9.68846e-06	0.00435838	2.45787	PREDICTED: protein NUCLEAR FUSION DEFECTIVE 4-like n_1 Tax_Cicer arietinum RepID_UPI00032A59E0	AT2G30300.1	Major facilitator superfamily protein	Medtr3g466110.1	nodulin-like/MFS transporter
Ca20087	Ca5	10051220	10067488	-0.458106	7.51555	-4.62917	0.000113435	0.0150482	1.17817	Uncharacterized protein n_9 Tax_Oryzinae RepID_A0A0E0JQC2_ORYPU	AT3G08690.2	UBC11 | ubiquitin-conjugating enzyme 11. protein polyubiquitination, ubiquitin-dependent protein catabolic process	Medtr3g062440.1	integrase-type DNA-binding superfamily protein
Ca20143	Ca5	10815081	10819320	-0.492841	4.79158	-4.67021	0.000102333	0.0142282	1.28049	PREDICTED: uncharacterized protein LOC101500860 n_1 Tax_Cicer arietinum RepID_UPI00032AA7BA	AT2G40130.1	Double Clp-N motif-containing P-loop. response to strigolactone	Medtr3g070850.1	double Clp-N motif P-loop nucleoside triphosphate hydrolase superfamily protein
Ca20393	Ca5	13521975	13523006	-1.20703	1.44263	-5.36835	1.7919e-05	0.00583131	2.79354	PREDICTED: BURP domain-containing protein 3-like n_2 Tax_Cicer arietinum RepID_UPI00032A7B86	AT1G49320.1	ATUSPL1, USPL1 | unknown seed protein, seed development, Encodes USPL1, a BURP domain protein targeted to the protein storage vacuoles. Overexpression of USPL1 affects seed development, protein storage vacuoles and lipid vesicles morphology and function.	Medtr3g116410.1	dehydration-responsive RD22-like protein
Ca20391	Ca5	13565011	13567252	-1.7416	4.89047	-6.08902	3.07879e-06	0.00235451	4.65896	Polyol/monosaccharide transporter 1 n_3 Tax_Papilionoideae RepID_G7J6H8_MEDTR	AT3G18830.1	ATPLT5, PMT5, ATPMT5 | polyol/monosaccharide. lateral root formation. This gene encodes a plasma membrane-localized polyol/cyclitol/monosaccharide-H+-symporter. The symporter is able to catalyze the energy-dependent membrane passage of a wide range of linear polyols (three to six carbon backbone), of cyclic polyols (myo-inositol), and of numerous monosaccharides, including pyranose ring-forming a…	Medtr3g116240.1	polyol/monosaccharide transporter 1
Ca20656	Ca5	16589828	16598879	0.413029	4.09884	5.58724	1.04427e-05	0.00456348	3.48891	PREDICTED: protein KAKU4 isoform X1 n_2 Tax_Cicer arietinum RepID_UPI00032AA38A	#N/A	#N/A	Medtr3g108780.1	hypothetical protein
Ca21362	Ca5	23511371	23513141	-1.16729	3.28804	-4.98007	4.70847e-05	0.00941078	2.09985	PREDICTED: probable E3 ubiquitin-protein ligase XERICO n_1 Tax_Cicer arietinum RepID_UPI00032A5568	AT2G04240.2	XERICO | RING/U-box superfamily protein, Encodes a small protein with an N-terminal trans-membrane domain and a RING-H2 zinc finger motif located at the C-terminus. Gene expression is induced by salt and osmotic stress. Transcrips levels are induced by DELLA proteins and repressed by gibberellic acid. Involved in ABA metabolism.abscisic acid metabolic process, response to gibberellin, response to…	Medtr3g082510.1	RING-H2 zinc finger protein
Ca21660	Ca5	27210391	27215023	0.67359	7.25734	4.61281	0.000118191	0.015085	1.14027	PREDICTED: RNA polymerase sigma factor sigE - chloroplastic/mitochondrial n_1 Tax_Cicer arietinum RepID_UPI00032AAD6D	AT5G24120.1	SIGE, SIG5, ATSIG5 | sigma factor E |	Medtr3g090900.3	RNA polymerase sigma factor
Ca21931	Ca5	29655827	29659141	-0.486427	3.45751	-4.81734	7.07552e-05	0.0114676	1.6815	PREDICTED: F-box protein At5g39450 n_1 Tax_Cicer arietinum RepID_UPI00032A948F	AT5G39450.1	F-box family protein | negative regulation of cellular process, negative regulation of macromolecule metabolic process	Medtr3g096670.1	F-box plant protein%2C putative
Ca22216	Ca5	34008786	34012565	-0.777073	1.51377	-5.23986	2.46436e-05	0.0068053	2.58702	PREDICTED: disease resistance protein RPM1-like n_1 Tax_Cicer arietinum RepID_UPI00032A655B	AT3G07040.1	RPM1, RPS3 | NB-ARC domain-containing. defense response, plant-type hypersensitive response	Medtr3g056585.1	LRR and NB-ARC domain disease resistance protein
Ca23061	Ca5	50717125	50720061	-1.45235	5.96677	-5.42136	1.57172e-05	0.0054635	3.08436	PREDICTED: probable folate-biopterin transporter 8 - chloroplastic n_1 Tax_Cicer arietinum RepID_UPI00032AD028	AT2G33280.1	Major facilitator superfamily protein, response to abscisic acid, response to salt stress, response to water deprivation	Medtr3g008470.1	folate/biopterin transporter
Ca01905	Ca6	609365	609634	-2.11134	3.71767	-11.1307	8.16017e-11	1.2481e-06	14.3639	Uncharacterized protein n_1 Tax_Medicago truncatula RepID_G7JHI6_MEDTR	#N/A	#N/A	Medtr4g083110.1	hypothetical protein
Ca01894	Ca6	713596	721917	-0.935877	2.55866	-4.73514	8.69479e-05	0.0129113	1.53012	PREDICTED: peroxisomal (S)-2-hydroxy-acid oxidase GLO1-like n_1 Tax_Cicer arietinum RepID_UPI00032A51C3	AT3G14420.6	Aldolase-type TIM barrel family protein, Encodes a glycolate oxidase that modulates reactive oxygen species-mediated signal transduction during nonhost resistance. defense response to bacterium, hydrogen peroxide biosynthetic process, oxidative photosynthetic carbon pathway	Medtr2g070420.1	peroxisomal (S)-2-hydroxy-acid oxidase GLO1
Ca02139	Ca6	2742380	2745623	-0.466885	4.29898	-5.97136	4.0905e-06	0.00272018	4.3851	Polymerase/histidinol phosphatase-like protein n_2 Tax_Papilionoideae RepID_A0A072UN52_MEDTR	AT2G13840.1	Polymerase/histidinol phosphatase-like	Medtr4g094258.2	polymerase/histidinol phosphatase-like protein
Ca02341	Ca6	4582838	4587239	-0.447985	2.8683	-4.58147	0.00012787	0.0161634	1.15653	Uncharacterized protein n_8 Tax_Phaseoleae RepID_I1KLI3_SOYBN	AT3G09010.1	Protein kinase superfamily protein. defense response to bacterium, defense response to fungus, glycosyl compound metabolic process, phosphorylation, phyllome development, response to alcohol, response to chitin, response to molecule of bacterial origin, response to organic cyclic compound, response to osmotic stress, response to water deprivation, secondary metabolic process, signal transduction,…	Medtr2g013210.2	receptor-like kinase
Ca02586	Ca6	7122056	7127563	-0.356632	4.66592	-4.65528	0.000106239	0.0143799	1.24731	PREDICTED: mitochondrial protein import protein ZIM17 n_1 Tax_Cicer arietinum RepID_UPI00032ACD16	#N/A	#N/A	Medtr4g045783.2	DNL zinc finger protein
Ca02914	Ca6	10061557	10063630	-1.03061	3.8251	-4.83471	6.77408e-05	0.0113458	1.70706	PREDICTED: expansin-like A2 n_1 Tax_Cicer arietinum RepID_UPI00032A6F37	AT4G38400.1	ATEXLA2, EXPL2, ATEXPL2, ATHEXP BETA 2.2, plant-type cell wall loosening, unidimensional cell growth,sexual reproduction	Medtr4g075790.2	expansin A1
Ca03079	Ca6	12002781	12004787	0.852556	4.32377	5.95052	4.3023e-06	0.00274182	4.33752	PREDICTED: uncharacterized protein At2g39920 isoform X1 n_2 Tax_Cicer arietinum RepID_UPI00032A9015	AT2G39920.2	HAD superfamily, subfamily IIIB acid	Medtr3g070090.1	acid phosphatase-like protein
Ca03228	Ca6	13623472	13626981	-0.621311	3.15566	-5.01936	4.26832e-05	0.00906722	2.17578	PREDICTED: transcription factor bHLH68 n_1 Tax_Cicer arietinum RepID_UPI00032A89F6	AT4G29100.1	basic helix-loop-helix (bHLH) DNA-binding. regulation of transcription, DNA-templated, response to abscisic acid	Medtr8g103065.1	BHLH transcription factor-like protein
Ca03290	Ca6	14180788	14182071	-1.97178	1.12808	-4.7387	8.61742e-05	0.0129113	1.32307	PREDICTED: uncharacterized protein LOC101500241 n_1 Tax_Cicer arietinum RepID_UPI00032A6349	AT5G56840.1	myb-like transcription factor family, regulation of transcription, DNA-templated	Medtr8g101650.1	MYB-like transcription factor family protein
Ca03319	Ca6	14311213	14318255	0.642919	4.67481	5.14684	3.10587e-05	0.00730835	2.42997	PREDICTED: auxin response factor 19-like isoform X1 n_2 Tax_Cicer arietinum RepID_UPI00032ACE85	AT1G19220.1	ARF19, IAA22, ARF11 | auxin response factor. Encodes an auxin response factor that contains the conserved VP1-B3 DNA-binding domain at its N-terminus and the Aux/IAA-like domains III and IV present in most ARFs at its C-terminus. The protein interacts with IAA1 (yeast two hybrid) and other auxin response elements such as ER7 and ER9 (yeast one hybrid). ARF19 protein can complement many aspects of…	Medtr8g101360.1	auxin response factor 2
Ca03490	Ca6	15677657	15683602	-0.370685	5.05339	-5.11099	3.39602e-05	0.00787003	2.34014	PREDICTED: glutathione S-transferase T1-like n_1 Tax_Cicer arietinum RepID_UPI00032A7A2B	AT5G41210.1	ATGSTT1, GST10, GSTT1 | glutathione S-transferase. toxin catabolic process, glutathione metabolic process	Medtr8g098420.2	glutathione S-transferase theta
Ca03860	Ca6	16344613	16361226	-0.638324	4.22229	-4.79829	7.42139e-05	0.0114676	1.60294	PREDICTED: random slug protein 5-like isoform X1 n_1 Tax_Cicer arietinum RepID_UPI00032A5313	AT1G01630.1	Sec14p-like phosphatidylinositol transfer. fatty acid metabolic process, plant epidermis development, plant organ morphogenesis	Medtr8g096180.2	polyphosphoinositide-binding protein
Ca03518	Ca6	16421027	16427327	0.544685	2.6428	4.61272	0.000118218	0.015085	1.23963	PREDICTED: respiratory burst oxidase homolog protein D-like n_1 Tax_Cicer arietinum RepID_UPI00032A9B18	AT5G47910.1	RBOHD, ATRBOHD | respiratory burst oxidase. carbohydrate homeostasis, cellular response to hypoxia, defense response, defense response to fungus, negative regulation of programmed cell death, osmosensory signaling pathway, reactive oxygen species metabolic process, response to heat, response to wounding	Medtr8g095520.1	respiratory burst oxidase-like protein D
Ca03714	Ca6	18747722	18750226	-2.51033	4.94973	-7.25545	2.00913e-07	0.000512161	7.26771	Heat shock cognate 70 kDa protein n_231 Tax_cellular organisms RepID_HSP7C_PETHY	AT3G12580.1	HSP70, ATHSP70 | heat shock protein 70.protein folding, response to bacterium, response to heat, response to temperature stimulus, response to virus	Medtr4g063710.1	heat shock cognate 70 kDa protein
Ca04158	Ca6	24354310	24360695	1.10231	2.41797	5.47736	1.36874e-05	0.00536791	3.23952	Putative serine/threonine-protein kinase n_10 Tax_Papilionoideae RepID_A0A0B2RDJ7_GLYSO	AT4G00710.1	BSK3 | BR-signaling kinase 3 | brassinosteroid mediated signaling pathway, protein phosphorylation	Medtr4g020070.2	LRR receptor-like kinase
Ca04516	Ca6	31440749	31441520	-2.22759	6.64531	-5.43312	1.52668e-05	0.0054635	3.11174	Non-specific lipid-transfer protein n_2 Tax_Cicer arietinum RepID_NLTP_CICAR	AT2G38540.1	LP1, LTP1, ATLTP1 | lipid transfer protein. lipid transport, calmodulin binding	Medtr4g428370.1	Lipid transfer protein
Ca05485	Ca6	46902533	46907631	-0.321178	6.50616	-4.69185	9.69213e-05	0.0137269	1.33329	PREDICTED: heat shock 70 kDa protein 15-like n_1 Tax_Cicer arietinum RepID_UPI00032A6C71	AT1G79920.1	Heat shock protein 70 (Hsp 70) family. cell differentiation, cell division, cellular protein localization, developmental growth, positive regulation of cellular process, regulation of multicellular organismal process, response to heat, root development, tissue development	Medtr4g012050.1	heat shock 70 kDa protein
Ca05486	Ca6	46915649	46920912	-0.491256	6.92986	-5.75084	6.9938e-06	0.00345065	3.86415	PREDICTED: heat shock 70 kDa protein 15-like n_1 Tax_Cicer arietinum RepID_UPI00032A6C71	AT1G79930.1	HSP91 | heat shock protein 91 | response to heat	Medtr4g012050.1	heat shock 70 kDa protein
Ca05684	Ca6	50455123	50458502	-0.915486	3.81181	-5.37542	1.76079e-05	0.00583131	3.00104	PREDICTED: transcription factor bHLH122 n_1 Tax_Cicer arietinum RepID_UPI00064143B2	#N/A	#N/A	Medtr4g065870.3	transcription factor bHLH122-like protein
Ca06643	Ca6	63922458	63924906	-1.03512	3.53143	-4.96737	4.86039e-05	0.00941078	2.04562	PREDICTED: xyloglucan endotransglucosylase/hydrolase 2 n_1 Tax_Cicer arietinum RepID_UPI00032A957C	AT3G23730.1	XTH16 | xyloglucan endotransglucosylase/hydrolase. cell wall biogenesis, xyloglucan metabolic process,	Medtr8g081040.1	xyloglucan endotransglucosylase/hydrolase family protein
Ca06742	Ca6	64774944	64776804	0.860225	5.32036	5.83215	5.7356e-06	0.00313307	4.05491	PREDICTED: butyrate--CoA ligase AAE11 - peroxisomal-like n_1 Tax_Cicer arietinum RepID_UPI00032AC765	AT1G65890.1	AAE12 | acyl activating enzyme 12 | alpha-amino acid metabolic process, response to inorganic substance, response to jasmonic acid, response to wounding	Medtr3g064420.1	long-chain acyl-CoA synthetase
Ca06701	Ca6	65133924	65138060	-0.991861	4.16853	-6.39379	1.48526e-06	0.00174747	5.35753	Glutamine synthetase PR-1 n_10 Tax_Pentapetalae RepID_GLNA1_PHAVU	AT5G16570.1	GLN1;4 | glutamine synthetase 1;4 |Encodes a cytosolic glutamine synthetase, the enzyme has high affinity for the substrate ammonium. nitrate assimilation, glutamine biosynthetic process	Medtr3g065250.1	glutamine synthetase domain protein
Ca06717	Ca6	65277851	65281262	0.855321	2.13039	5.20801	2.66734e-05	0.00686927	2.57838	PREDICTED: TATA-box-binding protein-like n_1 Tax_Cicer arietinum RepID_UPI00032A67D9	#N/A	#N/A	#N/A	#N/A
Ca15275	Ca7	2617623	2622335	-0.337189	2.76342	-4.61699	0.000116958	0.015085	1.24343	Uncharacterized protein n_2 Tax_Citrus clementina RepID_V4TGU2_9ROSI	AT2G18390.1	TTN5, HAL, ARL2, ATARLC1 | ADP-ribosylation. positive regulation of microtubule polymerization, protein folding.	Medtr8g077540.4	ADP-ribosylation factor-like protein A1D
Ca15497	Ca7	4968029	4977081	0.682253	4.6707	5.23425	2.4989e-05	0.0068053	2.63928	Kinesin-like calmodulin-binding protein n_2 Tax_Papilionoideae RepID_G7L7W2_MEDTR	AT5G65930.3	ZWI | kinesin-like calmodulin-binding.	Medtr8g072430.1	kinesin-like calmodulin-binding protein
Ca16250	Ca7	15803575	15810166	0.743574	2.33935	4.62675	0.000114128	0.0150482	1.28364	Plasma-membrane choline transporter family protein n_2 Tax_Papilionoideae RepID_A0A072TQG6_MEDTR	AT3G15380.1	| Plasma-membrane choline transporter. choline transport, ion homeostasis, leaf development, lipid homeostasis, plasmodesma organization, plasmodesmata-mediated intercellular transport, procambium histogenesis, protein transport, regulation of auxin polar transport, regulation of endocytosis, regulation of unidimensional cell growth, root development, transmembrane transport, vesicle-mediated tra…	Medtr8g059125.1	plasma-membrane choline transporter family protein
Ca16810	Ca7	23505431	23507112	-0.822003	3.38413	-5.3086	2.0778e-05	0.00635598	2.85151	PREDICTED: uncharacterized protein LOC101498004 n_1 Tax_Cicer arietinum RepID_UPI00032A95FE	AT1G72510.2	Protein of unknown function (DUF1677). cell differentiation, defense response, developmental growth, jasmonic acid mediated signaling pathway, plant epidermis development, response to chitin, response to wounding, root morphogenesis	Medtr8g021190.1	DUF1677 family protein
Ca17266	Ca7	31088737	31092661	0.602255	5.08627	4.81411	7.13296e-05	0.0114676	1.62553	PREDICTED: ribosome production factor 1 n_1 Tax_Cicer arietinum RepID_UPI00032A948E	AT4G01560.1	MEE49 | Ribosomal RNA processing Brix. embryo development ending in seed dormancy, maturation of 5.8S rRNA, maturation of LSU-rRNA, rRNA processing	Medtr8g023820.1	ribosome production factor-like protein
Ca17299	Ca7	31644338	31648917	0.574435	4.7359	4.96231	4.92228e-05	0.00941078	1.98595	Endoplasmic reticulum-type calcium-transporting ATPase n_4 Tax_Papilionoideae RepID_A0A072TP30_MEDTR	AT4G00900.1	ECA2, ATECA2 | ER-type Ca2+-ATPase 2 | calcium ion transmembrane transport, cellular calcium ion homeostasis, ion transmembrane transport, anatomical structure maturation, calcium ion transport, catabolic process, cell differentiation, defense response to other organism, plant organ morphogenesis, small molecule metabolic process	Medtr8g027160.1	endoplasmic reticulum-type calcium-transporting ATPase
Ca17551	Ca7	35537886	35543149	-0.62843	2.775	-4.75017	8.37316e-05	0.0126799	1.56027	PREDICTED: glyoxylate/hydroxypyruvate reductase HPR3-like n_1 Tax_Cicer arietinum RepID_UPI00032A598D	AT1G12550.1	D-isomer specific 2-hydroxyacid dehydrogenase. Encodes a hydroxypyruvate reductase that reduces HP to glycerate and shows even more activity with glyoxylate, a more upstream intermediate of the photorespiratory cycle. It is likely targeted to the chloroplast where it could provide a compensatory bypass for the reduction of HP and glyoxylate within this compartment. Together with HPPR2 and TAT1 in…	Medtr8g033390.1	D-isomer specific 2-hydroxyacid dehydrogenase domain protein
Ca18298	Ca7	46362380	46370818	0.581105	3.99616	4.72441	8.93199e-05	0.013136	1.43341	PREDICTED: putative inactive cadmium/zinc-transporting ATPase HMA3 n_1 Tax_Cicer arietinum RepID_UPI00032A65B1	AT2G19110.1	HMA4, ATHMA4 | heavy metal atpase 4 | cadmium ion transport, metal ion transport, response to cadmium ion, response to cobalt ion, response to metal ion, response to zinc ion, zinc ion homeostasis, zinc ion transport	Medtr4g127580.1	heavy metal transporting P-type ATPase%2C putative
Ca18732	Ca7	50594166	50596343	-1.57811	0.99783	-4.96254	4.91939e-05	0.00941078	1.68612	Equilibrative nucleoside transporter 6 n_2 Tax_Papilionoideae RepID_G7JE40_MEDTR	AT1G02630.1	Nucleoside transporter family protein, nucleoside transmembrane transport, plant-type secondary cell wall biogenesis, positive regulation of cellular biosynthetic process, positive regulation of gene expression, secondary metabolic process	Medtr4g114710.1	equilibrative nucleoside transporter 6
Ca18976	Ca7	52820982	52823287	-2.0055	3.76218	-5.98786	3.9304e-06	0.00272018	4.43061	PREDICTED: two-component response regulator ARR5-like n_1 Tax_Cicer arietinum RepID_UPI00032A95CD	#N/A	#N/A	Medtr4g106590.1	two-component response regulator ARR3-like protein
Ca00130	Ca8	892380	898580	-1.17684	6.12528	-4.97911	4.71979e-05	0.00941078	2.02277	PREDICTED: 4-coumarate--CoA ligase 2 n_1 Tax_Cicer arietinum RepID_UPI00032AC19A	AT1G65060.2	4CL3 | 4-coumarate	Medtr5g007640.1	4-coumarate:CoA ligase-like protein
Ca00136	Ca8	911654	929938	-2.85232	5.47798	-6.67067	7.73145e-07	0.00131392	5.98214	PREDICTED: chalcone synthase 1-like n_1 Tax_Cicer arietinum RepID_UPI00032A760D	AT5G13930.1	CHS, TT4, ATCHS | Chalcone and stilbene. auxin polar transport, chalcone biosynthetic process, flavonoid biosynthetic process, regulation of anthocyanin biosynthetic process, response to UV-B, response to auxin, response to gravity, response to jasmonic acid, response to oxidative stress, response to wounding	Medtr2g058470.1	chalcone and stilbene synthase family protein
Ca00225	Ca8	1536734	1540410	-0.668373	5.23742	-6.41124	1.42501e-06	0.00174747	5.39452	SGT1-2-like protein n_2 Tax_Papilionoideae RepID_G7KBZ4_MEDTR	#N/A	#N/A	Medtr5g009930.1	SGT1-2
Ca00257	Ca8	1788967	1790789	-1.24039	3.34844	-6.83884	5.2242e-07	0.00114149	6.32782	PREDICTED: heat stress transcription factor B-2b n_1 Tax_Cicer arietinum RepID_UPI00032A77C9	AT4G11660.1	AT-HSFB2B, HSFB2B | winged-helix DNA-binding, cellular response to hypoxia, negative regulation of transcription, DNA-templated	Medtr5g010680.3	heat shock transcription factor B2A
Ca00305	Ca8	2159070	2162828	-0.703262	5.90718	-6.61567	8.79554e-07	0.00134528	5.85834	Stress-inducible protein - putative n_3 Tax_Papilionoideae RepID_G7KG90_MEDTR	AT1G62740.1	Hop2 | stress-inducible protein, putative. response to cadmium ion	Medtr5g012030.1	stress-inducible protein%2C putative
Ca00370	Ca8	2684242	2685656	-0.396266	4.78161	-5.03365	4.1187e-05	0.0088726	2.15602	PREDICTED: probable BOI-related E3 ubiquitin-protein ligase 2 isoform X1 n_2 Tax_Cicer arietinum RepID_UPI000641328B	AT5G47050.1	SBP (S-ribonuclease binding protein). inorganic ion homeostasis, response to inorganic substance, response to light stimulus	Medtr5g013690.1	SBP (S-ribonuclease-binding protein) family protein
Ca00422	Ca8	3131446	3134732	-0.952472	1.30356	-5.92493	4.57767e-06	0.00280062	3.9357	PREDICTED: LRR receptor-like serine/threonine-protein kinase HSL2 n_1 Tax_Cicer arietinum RepID_UPI00032ABF95	AT5G65710.1	HSL2 | HAESA-like 2 | Encodes a protein controlling the separation step of floral organ abscission.Necessary for pathogen-triggered leaf abscission.defense response to Gram-negative bacterium, lateral root morphogenesis, leaf abscission, regulation of gene expression, protein phosphorylation	Medtr5g014720.1	LRR receptor-like kinase family protein
Ca00469	Ca8	3529045	3532824	-0.453103	5.42	-5.2283	2.53614e-05	0.0068053	2.62162	Phototropic-responsive NPH3 family protein n_2 Tax_Papilionoideae RepID_G7K3U5_MEDTR	AT2G14820.1	NPY2 | Phototropic-responsive NPH3 family. Involved in auxin-mediated organogenesis. positive gravitropism, protein ubiquitination	Medtr5g015790.1	phototropic-responsive NPH3 family protein
Ca00531	Ca8	4079280	4080437	-0.851802	1.76124	-4.89757	5.78752e-05	0.0103077	1.87448	Uncharacterized protein n_2 Tax_Papilionoideae RepID_G7K6P5_MEDTR	AT5G67020.1	unknown protein; BEST Arabidopsis thaliana. defense response to other organism, response to fungus, response to wounding	Medtr5g017410.1	hypothetical protein
Ca00574	Ca8	4460031	4461989	-0.836283	4.08222	-5.77803	6.54455e-06	0.00333663	3.93849	PREDICTED: pentatricopeptide repeat-containing protein At2g29760 - chloroplastic-like n_1 Tax_Cicer arietinum RepID_UPI000640EDCC	AT2G29760.1	OTP81 | Tetratricopeptide repeat (TPR)-like. ORGANELLE TRANSCRIPT PROCESSING 81, OTP81, QED1. chloroplast RNA processing	Medtr5g018690.1	PPR containing protein
Ca01122	Ca8	9406330	9411702	-1.11674	1.94226	-4.841	6.66826e-05	0.0113323	1.75981	PREDICTED: PHD finger protein At1g33420-like n_1 Tax_Cicer arietinum RepID_UPI00032A7CF1	AT1G33420.1	RING/FYVE/PHD zinc finger superfamily, cytokinesis, meristem development, negative regulation of cellular process, organic substance catabolic process, phyllome development, plant organ formation, positive regulation of macromolecule metabolic process, regulation of developmental process, regulation of multicellular organismal process	Medtr1g076990.3	PHD finger plant-like protein
Ca01797	Ca8	18815656	18822461	0.680892	4.88001	5.2021	2.70685e-05	0.00686927	2.55979	PREDICTED: post-GPI attachment to proteins factor 3 n_1 Tax_Cicer arietinum RepID_UPI00032AD312	AT5G62130.1	Per1-like family protein | cellular response to light stimulus, chromatin organization, regulation of developmental process, regulation of signal transduction, response to blue light, response to red or far red light,	Medtr6g465410.1	post-GPI attachment-like factor-protein
Ca31647	Scaffold0583	8101	11346	-0.720711	2.41371	-4.56687	0.000132642	0.016361	1.1419	PREDICTED: putative disease resistance RPP13-like protein 1 n_1 Tax_Cicer arietinum RepID_UPI00032AA2B7	AT3G14470.1	NB-ARC domain-containing disease resistance. defense response	Medtr1g047800.1	disease resistance protein (CC-NBS-LRR class) family protein
Ca32636	Scaffold1884	92694	95595	-4.39568	2.44127	-5.06536	3.80525e-05	0.00831447	2.26195	Putative uncharacterized protein n_13 Tax_Mesangiospermae RepID_F6HUM9_VITVI	AT5G52640.1	HSP81-1, ATHS83, HSP81.1, HSP83, ATHSP90.1, cellular response to heat, chaperone-mediated protein folding, defense response to bacterium, protein folding, protein stabilization	Medtr6g452990.1	heat shock protein 81-2
Ca33123	Scaffold4878	695365	697484	-0.523022	2.14961	-5.42528	1.55653e-05	0.0054635	3.10261	PREDICTED: uncharacterized protein LOC101492183 isoform X1 n_1 Tax_Cicer arietinum RepID_UPI00032AB3F8	#N/A		#N/A	#N/A
